# Supplementary material for: Computational modeling and quantitative physiology reveal central parameters for brassinosteroid-regulated early cell physiological processes linked to elongation growth of the Arabidopsis root
Source: eLife. 2022 Sep 7;11:e73031. doi: 10.7554/eLife.73031 (PMC9525061; doi:10.7554/eLife.73031)
Supplement: Appendix 1—figure 1—source data 1. [file elife-73031-app1-fig1-data1.xlsx]

## Sheet: 31.08.15 Calibration
Threshold 30/254
pH=4.8	488	561	Ratio 488/561		pH=5,2	488	561	Ratio 488/561		pH=5,6	488	561	Ratio 488/561		pH=6.0	488	561	Ratio 488/561		pH=6,4	488	561	Ratio 488/561
1	4.718	54.776	0.0861326		1	12.093	60.421	0.200146		1	23.931	57.999	0.412611		1	42.325	57.186	0.740129		1	76.492	68.22	1.12125
2	8.507	54.938	0.154847		2	16.229	62.421	0.259993		2	48.938	59.522	0.822183		2	67.862	65.768	1.03184		2	38.873	58.408	0.665542
3	3.808	51.942	0.0733125		3	12.459	56.313	0.221246		3	21.713	57.154	0.379903		3	46.448	49.341	0.941367		3	25.623	47.683	0.537361
4	5.054	67.427	0.0749551		4	11.677	61.356	0.190316		4	23.035	55.978	0.411501		4				1.55531	4	70.869	54.37	1.30346
5	6.243	50.913	0.122621		5	10.567	52.903	0.199743		5	37.64	55.117	0.682911		5	24.195	56.11	0.431207		5	67.022	68.93	0.97232
6	5.271	50.656	0.104055		6	8.851	50.837	0.174105		6	27.377	49.63	0.551622		6	19.402	55.876	0.347233		6	41.265	58.055	0.710791
7	6.259	51.657	0.121165		7	10.097	50.654	0.199333		7	12.215	45.521	0.268338		7	52.494	54.996	0.954506		7	34.27	65.289	0.524897
8	6.521	58.48	0.111508		8	6.324	49.092	0.128819		8	52.42	55.884	0.938014		8	47.257	68.089	0.694047		8	74.267	55.767	1.33174
9	5.239	49.687	0.10544		9	8.762	49.901	0.175588		9	11.835	53.369	0.221758		9	54.042	56.469	0.957021		9	59.784	57.127	1.04651
10	9.015	56.303	0.160116		10	11.371	54.98	0.206821		10	16.211	57.132	0.283746		10	71.964	67.891	1.05999		10	35.686	46.435	0.768515
11	7.833	49.131	0.159431		11	9.909	54.062	0.18329		11	32.555	54.427	0.598141		11	32.466	51.08	0.635591		11	87.97	50.866	1.72945
12	6.946	62.423	0.111273		12	7.776	53.347	0.145763		12	15.539	52.008	0.298781		12	52.883	70.883	0.74606		12	47.035	54.382	0.8649
13	5.714	47.543	0.120186		13	10.382	56.235	0.184618		13	45.372	52.975	0.856479		13	42.677	59.912	0.712328		13	44.315	76.847	0.576665
14	6.111	45.683	0.13377		14	10.109	57.025	0.177273		14	28.423	66.474	0.427581		14	56.29	66.095	0.851653		14	41.426	48.993	0.845549
15	3.75	53.732	0.0697908		15	10.473	49.833	0.210162		15	36.043	53.636	0.671993		15				1.50188	15	46.262	60.716	0.761941
average	6.06593	53.6861	0.113907		average	10.4719	54.6253	0.190481		average	28.8831	55.1217	0.510969		average	46.9465	59.9766	0.777152		average	52.7439	58.1392	0.917393
Stnd-Der.			0.0298934		Stnd-Der.			0.0307555		Stnd-Der.			0.235385		Stnd-Der.			0.219693		Stnd-Der.			0.339783
pH=6,8	488	561	Ratio 488/561		pH=7,2	488	561	Ratio 488/561		pH=7,6	488	561	Ratio 488/561		pH=8,0	488	561	Ratio 488/561
1	78.648	65.042	1.20919		1	92.525	56.979	1.62384		1	66.939	59.345	1.12796		1	91.504	69.735	1.31217
2	77.677	71.176	1.09134		2	67.016	67.11	0.998599		2	87.512	55.723	1.57048		2	83.736	60.197	1.39103
3	55.028	65.423	0.841111		3	92.555	70.966	1.30422		3	41.391	53.49	0.773808		3	107.222	72.532	1.47827
4	82.718	62.059	1.33289		4	91.763	52.593	1.74478		4	92.234	70.707	1.30445		4	119.853	66.326	1.80703
5	78.935	65.431	1.20639		5	73.451	54.247	1.35401		5	65.228	54.355	1.20004		5	63.525	74.793	0.849344
6	62.954	56.205	1.12008		6				1.94219	6	100.576	63.262	1.58983		6	50.699	53.47	0.948177
7	48.075	51.269	0.937701		7	59.639	63.185	0.943879		7	57.507	58.353	0.985502		7	87.649	71.742	1.22173
8	61.484	60.109	1.02288		8	72.827	58.16	1.25218		8	63.95	53.161	1.20295		8	111.251	71.08	1.56515
9	46.292	64.179	0.721295		9	69.304	61.241	1.13166		9	94.421	69.723	1.35423		9	107.391	72.63	1.4786
10	84.412	57.492	1.46824		10	95.484	68.266	1.39871		10	107.554	64.191	1.67553		10	36.15	51.005	0.708754
11	79.572	57.381	1.38673		11	77.143	65.519	1.17741		11	42.02	65.482	0.641703		11	37.679	53.773	0.700705
12	72.906	57.281	1.27278		12	56.501	54.179	1.04286		12	86.834	67.937	1.27815		12	65.749	50.313	1.3068
13	79.618	54.12	1.47114		13	57.668	58.67	0.982921		13	87.203	54.995	1.58565		13			#DIV/0!
14	47.769	57.799	0.826468		14				2.05151	14	86.035	67.994	1.26533		14			#DIV/0!
15	60.648	61.475	0.986547		15	97.017	62.736	1.54643		15	79.963	74.273	1.07661		15			#DIV/0!
average	67.7824	60.4294	1.12632		average	77.1456	61.0655	1.26935		average	77.2911	62.1994	1.24215		average	80.2007	63.9663	1.23065
Stnd-Der.			0.236553		Stnd-Der.			0.257208		Stnd-Der.			0.297883		Stnd-Der.			0.354651
			pH	Ratio	SD
			4.8	0.113907	0.0298934
			5.2	0.190481	0.0307555
			5.6	0.510969	0.235385
			6	0.777152	0.219693
			6.4	0.917393	0.339783
			6.8	1.12632	0.236553
			7.2	1.26935	0.257208
			7.6	1.24215	0.297883
			8	1.23065	0.354651
			MS	0.269864	0.0791756
			corr. pH	5.50872	0.227826
				eGFP	mRFP
			4.8	6.06593	53.6861
			5.2	10.4719	54.6253
			5.6	28.8831	55.1217
			6	46.9465	59.9766
			6.4	52.7439	58.1392
			6.8	67.7824	60.4294
			7.2	77.1456	61.0655
			7.6	77.2911	62.1994
			8	80.2007	63.9663

## Sheet: FigS1_A
Threshold 30/254; Calibrated with CC from 31.8. (at Elongation zone/transition zone)
Average pH in the elongation zone of Col-0
31.08.2015						08.09.2015						09.09.2015
EZ	488	561	Ratio 488/561	pH		EZ	488	561	Ratio 488/561	pH		EZ	488	561	Ratio 488/561	pH
1	35.798	71.739	0.499003	5.63364		1	26.491	59.789	0.443075	5.54908		1	26.989	66.924	0.403278	5.48669
2	48.22	77.451	0.622587	5.81398		2	18.536	58.449	0.317131	5.3418		2	17.327	51.832	0.334292	5.37202
3	44.525	70.747	0.629355	5.82379		3	47.087	74.328	0.633503	5.8298		3	26.646	47.544	0.560449	5.72389
4	36.032	62.947	0.572418	5.74129		4	16.022	55.088	0.290844	5.29383		4	15.519	51.145	0.303431	5.31707
5	22.654	73.317	0.308987	5.32716		5	19.982	65.077	0.307052	5.32366		5	14.717	52.325	0.281261	5.27578
6	26.096	60.868	0.428731	5.52685		6	16.219	53.339	0.304074	5.31824		6	24.201	45.568	0.531096	5.68102
7	40.038	81.858	0.489115	5.6189		7	25.958	54.053	0.480232	5.60559		7	10.882	50.929	0.21367	5.13744
8	16.73	58.908	0.284002	5.28097		8	29.225	59.53	0.490929	5.62161		8	17.543	45.929	0.381959	5.45226					WT Col-0
9	17.842	52.447	0.340191	5.38223		9	15.487	58.138	0.266383	5.24708		9	16.513	59.191	0.278978	5.27143				31.8.	5.37003
10	8.167	51.483	0.158635	5.00469		10	29.298	56.55	0.51809	5.6619		10	14.103	42.161	0.334503	5.37239				8.9.	5.44398
11	15.778	64.277	0.245469	5.20519		11	12.098	48.532	0.249279	5.21297		11	11.978	44.487	0.269247	5.25267				9.9.	5.38384
12	9.827	61.748	0.159147	5.00604		12	11.488	67.741	0.169587	5.03303		12	62.568	57.145	1.0949		1.0949			average	5.39928
13	19.474	64.357	0.302593	5.31554		13	36.188	61.112	0.592159	5.76992		13	10.419	43.933	0.237157	5.18799				Stnd-Der.	0.0393213
14	9.046	59.16	0.152907	4.98942		14	32.616	60.155	0.542199	5.69728		14	10.175	45.318	0.224524	5.16118
15	6.146	53.169	0.115594	4.88071		15	12.479	56.42	0.22118	5.15394		15	26.168	49.212	0.53174	5.68197
average	23.7582	64.2984	0.353916	5.37003		average	23.2783	59.2201	0.388381	5.44398		average	20.3832	50.2429	0.398699	5.38384
Stnd-Der.			0.176369	0.314775		Stnd-Der.			0.146972	0.245513		Stnd-Der.			0.223492	0.196701

## Sheet: FigS1_B
Average pH after 1h in response to NaVO4 (1h MS as negative control)
01.09.2015													09.09.2015
1h MS	488	561	Ratio 488/561	pH		500 µM NaVO4	488	561	Ratio 488/561	pH			1h MS	488	561	Ratio 488/561	pH		500 µM NaVO4	488	561	Ratio 488/561	pH
1	23.3	54.54	0.427209	5.52447		1	72.028	56.15	1.28278	8			1	57.081	51.08	1.11748		1.11748	1	64.833	49.206	1.31758	8
2	28.025	65.279	0.429311	5.52775		2	60.389	59.19	1.02026	6.49041			2	16.381	45.877	0.357063	5.41097		2	70.458	50.962	1.38256	8
3	19.985	56.838	0.351613	5.40176		3	115.98	62.972	1.84177	8			3	22.847	50.218	0.454956	5.56731		3	37.982	47.174	0.805147	6.08718
4	20.175	63.489	0.317772	5.34294		4	67.812	53.838	1.25956	7.94162			4	7.572	43.859	0.172644	5.04075		4	43.83	52.188	0.839848	6.14327
5	22.829	59.572	0.383217	5.45432		5	83.159	44.781	1.85702	8			5	13.06	42.142	0.309905	5.32882		5	76.139	46.816	1.62635	8
6	15.703	55.362	0.283642	5.28029		6	97.776	66.575	1.46866	8			6	18.512	52.787	0.350692	5.4002		6	47.439	44.793	1.05907	6.58739
7	26.826	67.185	0.399286	5.4803		7	106.626	67.004	1.59134	8			7	18.554	44.954	0.412733	5.50172		7	47.599	47.769	0.996441	6.43644
8	23.667	65.763	0.359883	5.41571		8	59.463	68.073	0.873518	6.19995			8	22.751	41.257	0.551446	5.71078		8	46.099	44.612	1.03333	6.5217
9	20.066	60.59	0.331177	5.36659		9	76.857	63.948	1.20187	7.16875			9	17.194	58.828	0.292276	5.2965		9	56.409	50.458	1.11794	6.76603
10	35.285	63.362	0.55688	5.7187		10	56.418	70.207	0.803595				10	20.313	45.324	0.448173	5.55692		10	42.128	47.641	0.88428	6.21863
11	22.821	64.531	0.353644	5.4052		11	83.382	61.286	1.36054	8			11	15.039	46.438	0.323851	5.35373		11	62.546	42.96	1.45591	8
12	15.382	63.915	0.240663	5.19529		12	90.266	60.599	1.48956	8			12	8.413	46.457	0.181092	5.06168		12	58.852	47.67	1.23457	7.46756
13	19.811	64.746	0.30598	5.32171		13	99.762	54.943	1.81574	8			13	11.749	42.848	0.274202	5.26226		13	57.135	46.796	1.22094	7.32202
14	35.132	62.741	0.559953	5.72317		14	80.895	55.519	1.45707	8			14	16.359	49.636	0.329579	5.3638		14	54.96	50.47	1.08896	6.67215
15	26.501	57.218	0.463158	5.5798		15	69.831	59.819	1.16737	6.96859			15	25.025	46.735	0.535466	5.68743		15	65.424	44.614	1.46645	8
average	23.7005	61.6754	0.384226	5.4492		average	81.3763	60.3269	1.36604	7.62638			average	19.39	47.2293	0.407437	5.39592		average	55.4555	47.6086	1.16863	7.08149
Stnd-Der.			0.0916901	0.148866		Stnd-Der.			0.329247	0.639889			Stnd-Der.			0.225346	0.200725		Stnd-Der.			0.24578	0.769012
									1h MS	1h 500 µM NaVO4
								1.9.	5.4492	7.62638
								9.9.	5.39592	7.08149
								average	5.42256	7.35394
								Stnd-Der.	0.0376752	0.385294
