# Supplementary material for: Computational modeling and quantitative physiology reveal central parameters for brassinosteroid-regulated early cell physiological processes linked to elongation growth of the Arabidopsis root
Source: eLife. 2022 Sep 7;11:e73031. doi: 10.7554/eLife.73031 (PMC9525061; doi:10.7554/eLife.73031)
Supplement: Appendix 1—figure 4—source data 1. [file elife-73031-app1-fig4-data1.xlsx]

## Sheet: Sheet1
	Scaled sensitivites of the pH change 60 min after stimulating with 10 nM BL. Shown are the results of 10 structurally identical models with independent parameterizations.
	Model Parameters
Model #	Values[Kd].InitialValue	Values[k_off BL_BRI1_BAK1].InitialValue	Values[Ki BIK1].InitialValue	Values[Ki BKI1].InitialValue	Values[factor bri1].InitialValue	Values[factor bir3].InitialValue	Values[ratio AHA1:AHA2].InitialValue	Values[BRI1 [#/um2]].InitialValue	Values[AHA2 [molecules per um2]].InitialValue	Values[dose BL].InitialValue	Values[rel_affinity_BIR3].InitialValue	(111 Phosphorylation of BKI1).k1	(14 Transphosphorylation of BAK1 by BRI1).k1	(01 P-ATPase pump activity).k	(01 P-ATPase pump activity).Inhibition_AHACT	(02 Proton leak).k	(17 Phorylation of BRI1 to inhibit signaling).k	(17 Phorylation of BRI1 to inhibit signaling).K	(d5 Dephosphorylation of BKI1_pY211).k	(d4 Dephosphorylation of BL_BRI1pppS891_BAK1p).k	(15 Phosphorylation of P-ATPase C-terminus).k	(15 Phosphorylation of P-ATPase C-terminus).K	(d7 Dephosphorylation of ATPase C-terminus).k1	(12 Autophosphorylation of BRI1).k1	(13 Interaction BAK1 and BRI1).k1	(13 Interaction BAK1 and BRI1).k2	(d6 Dephosphorylation of BIK1p).k1	(10 Phosphorylation of BIK1).k1	(07 Interaction of BIR3 and BAK1).k	(06 Interaction of BRI1 and BIR3).k	(06 Interaction of BRI1 and BIR3).Kd	(09 Ligand Binding).k1	(03 K influx).k	(03 K influx).Kd	(05 K efflux).k	(16 CNGC10 activation).k	(16 CNGC10 activation).k2	(16 CNGC10 activation).Km	(08 BL influx).k	(04 K efflux).k	(04 K efflux).Keq
3	0.000151707	-0.0221843	0.000266119	-3.76e-05	2.26113	-2.93569	0.613871	2.26137	1.22775	0.0170572	-0.000271427	-0.000185625	0.000321672	1.22795	-1.00676	-0.830737	-0.591225	3.6e-05	-8.54e-06	1.46e-06	0.630838	-0.630213	-0.63033	-0.000183351	-0.000345703	-0.000124085	0	0	-0.000199847	-0.0588154	0.00861477	0.0171232	-3.95e-05	9.14e-05	0.000164148	-0.000150181	2.02e-05	-0.000233463	-0.000219895	0.00018454	2.03e-05
6	0.00025233	-0.0128176	0.000203094	-0.000347347	2.33069	-3.0403	0.61096	2.33044	1.2224	0.00749624	0.000446475	-0.000157657	-2.03e-05	1.22405	-1.00399	-0.827644	-0.601185	-5.55e-06	-0.000121525	0.000378887	0.630514	-0.628578	-0.630852	-0.000147526	-0.00132628	0.000380237	0	0	5.82e-05	-0.057381	0.000337258	0.00798655	-5.84e-05	0.000293998	-0.000255011	-0.000180399	-0.000164502	-0.000368255	-0.000248867	0.000182135	-0.00020821
14	-0.251946	-0.497321	-0.000390742	-0.00779314	0.909642	-0.349521	-0.323679	0.909864	-0.649857	0.478543	0.267848	-0.00138064	-0.00922509	1.48099	-0.780102	-1.00887	-0.923666	0.000501246	-0.00239367	0.000460738	2.12272	-0.00730947	-2.14151	-0.0117507	0.273035	-0.000166476	-0.0120087	-0.00814836	7.62e-05	-0.00162238	0.301254	0.227335	-0.000194427	-0.0049638	-0.00115446	-0.0114492	-0.011695	-0.0112745	-0.0114573	-3.2e-05	-0.000507996
23	-0.00013362	-0.00518227	-0.00144697	-0.000349764	2.5373	-3.31231	0.596318	2.53823	1.19344	-0.00166029	-0.00048971	-0.000770185	-0.00164664	1.19405	-0.982391	-0.791179	-0.622358	-0.000710681	-0.00127828	-4.95e-07	0.625096	-0.626926	-0.626785	-0.000231036	-0.0014624	-0.00144602	0	0	-0.00120985	-0.000192923	0.000414644	-0.000772141	-0.00163506	-0.00102935	-0.000693174	0.000433773	-0.000744982	-0.00177598	-0.000869228	-0.000567442	-0.00128999
34	0.000110655	-0.0219916	-0.000128037	0.000101163	2.25836	-2.93189	0.613902	2.25817	1.22772	0.017149	-4.77e-05	-0.000133135	-0.000117383	1.22739	-1.00616	-0.830923	-0.590547	0.000469183	-0.000128292	6.04e-06	0.630498	-0.630474	-0.630361	-8.63e-05	-0.000461685	-0.000508946	0	0	8.04e-05	-0.0588711	0.00869887	0.017396	0.000512547	-0.000209638	-1.04e-05	0.000103013	4.51e-05	0.000140377	-7.37e-05	-6.57e-05	-0.000449606
38	0.000248304	-0.0128171	-0.0001164	3.56e-05	2.32721	-3.03562	0.611703	2.32706	1.22315	0.00823649	-0.000294324	7.56e-05	0.000145852	1.22388	-1.00313	-0.827595	-0.600022	3.78e-05	-0.000203742	-8.52e-05	0.630145	-0.628601	-0.629997	8.41e-05	-0.00140697	-0.000193808	0	0	0.000106529	-0.0573435	-0.000411724	0.00850089	0.000348362	8.59e-05	6.42e-05	5.01e-05	1.93e-07	0.000811304	5.13e-05	0.000199957	3.09e-05
40	-0.000480182	-0.00441921	-0.000856971	-0.00106113	2.53707	-3.31135	0.597061	2.53775	1.19417	0.000143721	-0.000777209	-0.00105085	-0.000702389	1.19373	-0.981775	-0.791292	-0.62342	-0.000885122	0.000959956	1e-05	0.626015	-0.627349	-0.627282	-0.000895881	-0.000815903	-0.000477728	0	0	-0.00101099	0.000148351	0.000686056	-0.000975753	-0.00101086	0.000552736	-0.00105266	-0.00110535	-0.000394244	-0.000154746	-0.000769845	-0.00105267	-0.000154806
45	-0.0014035	-0.00469183	-0.00231356	-0.000818004	2.53649	-3.31197	0.595516	2.53659	1.19347	-0.00202981	-0.000222266	-0.00153985	-0.00189455	1.19372	-0.982553	-0.792505	-0.623799	-0.0012719	-0.00152956	-0.000559665	0.62508	-0.627887	-0.628863	-0.0012593	-0.00128693	-0.00211818	0	0	-0.00161555	-0.00125514	-7.25e-05	-0.0015464	-0.000416966	-0.00116164	-0.00111117	-0.00115685	-0.00114995	-0.000384424	-0.00100495	-0.000964945	-0.00204725
47	-0.00048167	-0.0219405	9.21e-05	-0.000156993	2.26382	-2.93963	0.61393	2.26343	1.22724	0.0171772	-0.000405263	3.19e-05	-0.000203212	1.22889	-1.00786	-0.831659	-0.591915	-2.84e-05	-0.000346835	-2.15e-07	0.631659	-0.630576	-0.631764	-0.000131769	-0.000766115	-0.000370351	0	0	0.000295303	-0.0595262	0.0082733	0.0171197	-0.000187886	-0.000264622	-0.000334119	-0.000334953	-3.5e-05	-0.000297823	5.6e-05	-0.00022756	0.000449222
50	0.000178467	-0.0226388	0.000176664	0.00019696	2.25656	-2.9291	0.614227	2.25647	1.22787	0.017688	0.000343635	0.000335415	0.0001656	1.22788	-1.00598	-0.829999	-0.589933	0.000565811	0.000277247	8.47e-06	0.630693	-0.630258	-0.629931	0.000230461	-0.000132678	0.000205623	0	0	6.71e-05	-0.0590307	0.00871689	0.0182735	-5.46e-05	0.000591309	0.000428637	0.000282147	-5.02e-05	0.00039858	3.82e-05	0.000231391	0.000363932
