# Supplementary material for: Computational modeling and quantitative physiology reveal central parameters for brassinosteroid-regulated early cell physiological processes linked to elongation growth of the Arabidopsis root
Source: eLife. 2022 Sep 7;11:e73031. doi: 10.7554/eLife.73031 (PMC9525061; doi:10.7554/eLife.73031)
Supplement: Appendix 1—figure 5—source data 1. [file elife-73031-app1-fig5-data1.xlsx]

## Sheet: Appendix1 Fig.6
BL [nM]	Data Fig6 MZ	Err Fig6 MZ	Data Fig4 EE	Err Fig4 EE
0	5.66138	0.0217849
			5.4223	0.022696			Values that are shown in Appendix1 Fig. 6
0.1	5.63695	0.0176792
			5.37126	0.00942125
1	5.58105	0.0216162
			5.23145	0.0266463
5	5.44157	0.120849					Values are based on the simulations from Fig 4A / Fig. 6A
			5.10704	0.052579
10	5.42394	0.119902									Erros is standart deviation
			5.07598	0.00869929
Simulation results of 10 models (structurally identical but independent parameterizations). Numbers correspond to the number of the model (internal numbering)
Dose-Response behavior
		Modell #
	BL [nM]	3	6	14	23	34	38	40	45	47	50				mean	standard deviation
	0	5.43694	5.43116	5.35568	5.42505	5.43214	5.43776	5.42776	5.42512	5.4295	5.43649				5.4223	0.022696
	0.1	5.38236	5.3766	5.34998	5.36475	5.37753	5.38308	5.36746	5.36484	5.37523	5.38191				5.37126	0.00942125
	1	5.23587	5.22703	5.30446	5.20661	5.23104	5.23358	5.20931	5.20664	5.22889	5.23548				5.23145	0.0266463
	5	5.09953	5.09103	5.26166	5.07473	5.09465	5.09769	5.07746	5.07476	5.09235	5.09903				5.10704	0.052579
	10	5.08781	5.08092	5.06268	5.06645	5.08287	5.08755	5.06917	5.06647	5.08057	5.08718				5.07598	0.00869929
	50	5.06365	5.06157	5.00938	5.074	5.05855	5.06803	5.07653	5.07384	5.0562	5.06271				5.06009	0.0182042
	100	5.03822	5.03651	5.00824	5.07298	5.03314	5.04298	5.07533	5.07263	5.03082	5.03731				5.04555	0.0207167
Simulation results of 10 models (structurally identical but independent parameterizations). Numbers correspond to the number of the model (internal numbering)
	BL [nM]	3	6	14	23	34	38	40	45	47	50				mean	standard deviation
	0	5.6744	5.66869	5.59409	5.66266	5.66966	5.67521	5.66534	5.66273	5.66706	5.67396				5.66138	0.0217849
	0.1	5.64921	5.64372	5.58369	5.63492	5.64446	5.65021	5.6376	5.63499	5.64195	5.64877				5.63695	0.0176792
	1	5.59493	5.58917	5.51507	5.58019	5.59028	5.59569	5.58287	5.58023	5.58761	5.59449				5.58105	0.0216162
	5	5.48627	5.48319	5.06142	5.48209	5.48139	5.48975	5.48477	5.4821	5.47904	5.48564				5.44157	0.120849
	10	5.46333	5.46373	5.04708	5.47181	5.4584	5.47025	5.47443	5.47176	5.45606	5.46257				5.42394	0.119902
	50	5.4206	5.42842	5.07819	5.46425	5.41567	5.43949	5.4664	5.46373	5.43113	5.41975				5.40276	0.104655
	100	5.40259	5.41212	5.08325	5.45618	5.39772	5.4187	5.45799	5.45532	5.39537	5.4018				5.3881	0.0995572
Statistics for Appendix1 Fig. 6
The groups are compared seperately (e.g. meristem 0 BL vs. Elongation zone 0 BL)
meristem 0 BL vs. elongation zone 0 BL
Data is not normally distrubuted (Shapiro-Wilk Test), two-tailed Wilcoxon Test needs to be applied
meristem 0,1 BL vs. elongation zone 0,1 BL
Data is not normally distrubuted (Shapiro-Wilk Test), two-tailed Wilcoxon Test needs to be applied
meristem 1 BL vs. elongation zone 1 BL
Data is not normally distrubuted (Shapiro-Wilk Test), two-tailed Wilcoxon Test needs to be applied
meristem 5 BL vs. elongation zone 5 BL
Data is not normally distrubuted (Shapiro-Wilk Test), two-tailed Wilcoxon Test needs to be applied
meristem 10 BL vs. elongation zone 10 BL
Data is not normally distrubuted (Shapiro-Wilk Test), two-tailed Wilcoxon Test needs to be applied
