# Supplementary material for: Computational modeling and quantitative physiology reveal central parameters for brassinosteroid-regulated early cell physiological processes linked to elongation growth of the Arabidopsis root
Source: eLife. 2022 Sep 7;11:e73031. doi: 10.7554/eLife.73031 (PMC9525061; doi:10.7554/eLife.73031)
Supplement: Appendix 1—figure 6—source data 1. [file elife-73031-app1-fig6-data1.xlsx]

## Sheet: 9A
Fitted pH response 20 min after stimulating with 10 nM BL for BIR3 and BIR3 & BRI1 overexpression
Shown are the results of 10 models (structurally identical, independent parameterizations).
		Model #
		3	6	14	23	34	38	40	45	47	50
	BIR3 overexpression	-0.00198477	-0.00205394	0.00102912	-0.00241427	-0.00197289	-0.00208429	-0.0024118	-0.00237393	-0.00197811	-0.00196547
	BIR3 & BRI1 overexpression	-0.383387	-0.374205	-0.415693	-0.371745	-0.383267	-0.374072	-0.371798	-0.371836	-0.383403	-0.383178

## Sheet: 9B
Scan of pH change 20 min after stimulating with 10 nM BL at differend BIR3 expression levels.
Shown are the results of 10 models (structurally identical, independent parameterizations).
		Model #
	x-fold BIR3 expression	3	6	14	23	34	38	40	45	47	50
	0	-0.612851	-0.616132	-0.498594	-0.627753	-0.612782	-0.615909	-0.627733	-0.627787	-0.61297	-0.612623
	1	-0.342073	-0.342615	-0.39435	-0.334072	-0.342119	-0.342552	-0.334078	-0.334128	-0.342135	-0.342031
	2	-0.003023	-0.00210356	-0.206121	-0.00244432	-0.00300951	-0.00213402	-0.00244456	-0.00240759	-0.00299753	-0.00301359
	3	-0.0024437	-0.00207367	-0.105695	-0.00242185	-0.00243134	-0.00210406	-0.00242047	-0.00238363	-0.00242846	-0.00242843
	4	-0.00226871	-0.00206509	-0.0783156	-0.00241735	-0.00225664	-0.00209545	-0.00241563	-0.00237885	-0.00225657	-0.00225162
	5	-0.0021851	-0.00206123	-0.0776732	-0.00241589	-0.00217314	-0.0020916	-0.00241401	-0.00237724	-0.00217443	-0.00216705
	6	-0.00213648	-0.00205913	-0.0722698	-0.00241507	-0.00212463	-0.00208949	-0.00241317	-0.00237647	-0.00212671	-0.00211792
	7	-0.00210495	-0.00205782	-0.0606605	-0.00241463	-0.00209315	-0.00208818	-0.0024127	-0.00237602	-0.00209576	-0.0020861
	8	-0.00208299	-0.00205696	-0.051871	-0.00241436	-0.00207123	-0.00208732	-0.0024124	-0.0023757	-0.00207421	-0.00206386
	9	-0.00206691	-0.00205638	-0.0449813	-0.0024142	-0.00205518	-0.00208675	-0.00241223	-0.00237552	-0.00205843	-0.0020476
	10	-0.0020547	-0.00205592	-0.0394398	-0.00241409	-0.00204299	-0.00208629	-0.00241211	-0.0023754	-0.00204644	-0.00203526
	11	-0.00204516	-0.00205559	-0.0348932	-0.00241401	-0.00203346	-0.00208597	-0.00241202	-0.00237531	-0.00203707	-0.00202559
	12	-0.00203749	-0.00205535	-0.0311025	-0.00241395	-0.00202583	-0.00208571	-0.00241195	-0.00237521	-0.0020296	-0.00201786
	13	-0.00203127	-0.00205506	-0.0279003	-0.0024139	-0.0020196	-0.00208545	-0.00241191	-0.0023752	-0.00202347	-0.00201156
	14	-0.0020261	-0.00205498	-0.0251651	-0.00241387	-0.00201445	-0.00208533	-0.00241187	-0.00237516	-0.00201841	-0.00200635
	15	-0.00202183	-0.00205485	-0.0228065	-0.00241385	-0.00201013	-0.00208495	-0.00241184	-0.00237513	-0.00201417	-0.00200197
	16	-0.00201813	-0.00205473	-0.020756	-0.00241382	-0.00200649	-0.00208514	-0.00241182	-0.00237511	-0.00201057	-0.00199828
	17	-0.00201497	-0.00205466	-0.0189605	-0.00241381	-0.00200333	-0.00208517	-0.0024118	-0.00237509	-0.00200749	-0.0019951
	18	-0.00201225	-0.00205457	-0.017378	-0.00241379	-0.00200073	-0.00208494	-0.00241178	-0.00237507	-0.00200483	-0.00199233
	19	-0.00200992	-0.00205451	-0.0159753	-0.00241378	-0.00199826	-0.00208486	-0.00241176	-0.00237506	-0.00200252	-0.00199002
	20	-0.00200778	-0.00205447	-0.0147256	-0.00241376	-0.00199621	-0.00208481	-0.00241188	-0.00237512	-0.00200049	-0.00198785
	21	-0.00200598	-0.00205441	-0.013607	-0.00241378	-0.00199439	-0.00208477	-0.00241177	-0.00237503	-0.0019987	-0.001986
	22	-0.00200436	-0.00205437	-0.0126013	-0.00241378	-0.00199275	-0.00208466	-0.00241176	-0.00237514	-0.00199711	-0.00198436
	23	-0.00200323	-0.00205441	-0.0116936	-0.00241378	-0.00199131	-0.00208468	-0.00241177	-0.00237502	-0.00199569	-0.00198289
	24	-0.00200162	-0.00205431	-0.0108715	-0.00241379	-0.00199002	-0.00208464	-0.00241177	-0.00237503	-0.00199451	-0.00198159
	25	-0.00200042	-0.00205421	-0.0101243	-0.00241373	-0.00198887	-0.00208464	-0.00241178	-0.00237503	-0.00199328	-0.00198073
	26	-0.00199941	-0.00205423	-0.00944304	-0.00241372	-0.00198781	-0.00208459	-0.00241171	-0.00237503	-0.00199228	-0.00197931
	27	-0.00199847	-0.00205421	-0.0088202	-0.00241381	-0.00198686	-0.00208456	-0.00241171	-0.00237503	-0.0019913	-0.00197839
	28	-0.0019976	-0.0020542	-0.00824915	-0.00241371	-0.001986	-0.00208455	-0.00241183	-0.00237498	-0.00199048	-0.00197747
	29	-0.0019968	-0.00205422	-0.00772428	-0.0024137	-0.00198522	-0.00208453	-0.00241169	-0.00237498	-0.00198971	-0.00197676
	30	-0.00199617	-0.00205416	-0.0072407	-0.00241375	-0.00198454	-0.00208452	-0.00241164	-0.00237511	-0.00198904	-0.00197598

## Sheet: 9C
Time-course simulations of the pH change in response to 10 nM BL at different BIR3 expression levels
Shown are the results of 10 models (structurally identical, independent parameterizations).
The models were stimulated at Time = 86400 s (=24h), which represents time = 0 min in Fig. 9C.
0-fold expression of BIR3													1-fold expression of BIR3												10-fold expression of BIR3											10-fold expression of BIR3
	Model #												Model #												Model #												Model #
Time [s]	3	6	14	23	34	38	40	45	47	50		Time [s]	3	6	14	23	34	38	40	45	47	50		Time [s]	3	6	14	23	34	38	40	45	47	50		Time [s]	3	6	14	23	34	38	40	45	47	50
86000	-0.00198395	-0.0020541	0.00155481	-0.00241373	-0.00197236	-0.00208426	-0.00241163	-0.002375	-0.00197718	-0.00196379		86000	-0.00198395	-0.00205409	0.0015548	-0.00241366	-0.0019724	-0.00208422	-0.00241166	-0.00237495	-0.00197717	-0.00196371		86000	-0.00198397	-0.00205411	0.0015548	-0.00241367	-0.00197241	-0.00208424	-0.00241166	-0.00237495	-0.00197717	-0.00196373		86000	-0.00198398	-0.00205412	0.0015548	-0.00241367	-0.00197241	-0.00208425	-0.00241166	-0.002375	-0.00197718	-0.00196372
86001	-0.00198395	-0.0020541	0.00155481	-0.00241373	-0.00197236	-0.00208426	-0.00241163	-0.002375	-0.00197718	-0.00196379		86001	-0.00198395	-0.00205409	0.0015548	-0.00241366	-0.0019724	-0.00208422	-0.00241166	-0.00237495	-0.00197717	-0.00196371		86001	-0.00198397	-0.00205411	0.0015548	-0.00241367	-0.00197241	-0.00208424	-0.00241166	-0.00237495	-0.00197717	-0.00196373		86001	-0.00198398	-0.00205412	0.0015548	-0.00241367	-0.00197241	-0.00208425	-0.00241166	-0.002375	-0.00197718	-0.00196372
86002	-0.00198395	-0.0020541	0.00155481	-0.00241373	-0.00197236	-0.00208426	-0.00241163	-0.002375	-0.00197719	-0.00196379		86002	-0.00198395	-0.00205409	0.0015548	-0.00241366	-0.0019724	-0.00208422	-0.00241166	-0.00237495	-0.00197717	-0.00196371		86002	-0.00198397	-0.00205411	0.0015548	-0.00241367	-0.00197241	-0.00208424	-0.00241166	-0.00237495	-0.00197717	-0.00196373		86002	-0.00198398	-0.00205412	0.0015548	-0.00241367	-0.00197241	-0.00208425	-0.00241166	-0.002375	-0.00197718	-0.00196372
86003	-0.00198395	-0.0020541	0.00155481	-0.00241373	-0.00197236	-0.00208426	-0.00241163	-0.002375	-0.00197719	-0.00196379		86003	-0.00198395	-0.00205409	0.0015548	-0.00241366	-0.0019724	-0.00208422	-0.00241166	-0.00237495	-0.00197717	-0.00196371		86003	-0.00198397	-0.00205411	0.0015548	-0.00241367	-0.00197241	-0.00208424	-0.00241166	-0.00237495	-0.00197717	-0.00196373		86003	-0.00198398	-0.00205412	0.0015548	-0.00241367	-0.00197241	-0.00208425	-0.00241166	-0.002375	-0.00197718	-0.00196372
86004	-0.00198395	-0.0020541	0.00155481	-0.00241373	-0.00197236	-0.00208426	-0.00241163	-0.002375	-0.00197719	-0.00196379		86004	-0.00198395	-0.00205409	0.0015548	-0.00241366	-0.0019724	-0.00208422	-0.00241166	-0.00237495	-0.00197717	-0.00196371		86004	-0.00198397	-0.00205411	0.0015548	-0.00241367	-0.00197241	-0.00208424	-0.00241166	-0.00237495	-0.00197717	-0.00196373		86004	-0.00198398	-0.00205412	0.0015548	-0.00241367	-0.00197241	-0.00208425	-0.00241166	-0.002375	-0.00197718	-0.00196372
86005	-0.00198395	-0.0020541	0.00155481	-0.00241373	-0.00197236	-0.00208426	-0.00241163	-0.002375	-0.00197719	-0.00196379		86005	-0.00198395	-0.00205409	0.0015548	-0.00241366	-0.0019724	-0.00208422	-0.00241166	-0.00237495	-0.00197717	-0.00196371		86005	-0.00198397	-0.00205411	0.0015548	-0.00241367	-0.00197241	-0.00208424	-0.00241166	-0.00237495	-0.00197717	-0.00196373		86005	-0.00198398	-0.00205412	0.0015548	-0.00241367	-0.00197241	-0.00208425	-0.00241166	-0.002375	-0.00197718	-0.00196372
86006	-0.00198395	-0.0020541	0.00155481	-0.00241373	-0.00197236	-0.00208426	-0.00241163	-0.002375	-0.00197719	-0.00196379		86006	-0.00198395	-0.00205409	0.0015548	-0.00241366	-0.0019724	-0.00208422	-0.00241166	-0.00237495	-0.00197717	-0.00196371		86006	-0.00198397	-0.00205411	0.0015548	-0.00241367	-0.00197241	-0.00208424	-0.00241166	-0.00237495	-0.00197717	-0.00196373		86006	-0.00198398	-0.00205412	0.0015548	-0.00241367	-0.00197241	-0.00208425	-0.00241166	-0.002375	-0.00197718	-0.00196372
86007	-0.00198395	-0.0020541	0.00155481	-0.00241373	-0.00197236	-0.00208426	-0.00241163	-0.002375	-0.00197719	-0.00196379		86007	-0.00198395	-0.00205409	0.0015548	-0.00241366	-0.0019724	-0.00208422	-0.00241166	-0.00237495	-0.00197717	-0.00196371		86007	-0.00198397	-0.00205411	0.0015548	-0.00241367	-0.00197241	-0.00208424	-0.00241166	-0.00237495	-0.00197717	-0.00196373		86007	-0.00198398	-0.00205412	0.0015548	-0.00241367	-0.00197241	-0.00208425	-0.00241166	-0.002375	-0.00197718	-0.00196372
86008	-0.00198395	-0.0020541	0.00155481	-0.00241373	-0.00197236	-0.00208426	-0.00241163	-0.002375	-0.00197719	-0.00196379		86008	-0.00198395	-0.00205409	0.0015548	-0.00241366	-0.0019724	-0.00208422	-0.00241166	-0.00237495	-0.00197717	-0.00196371		86008	-0.00198397	-0.00205411	0.0015548	-0.00241367	-0.00197241	-0.00208424	-0.00241166	-0.00237495	-0.00197717	-0.00196373		86008	-0.00198398	-0.00205412	0.0015548	-0.00241367	-0.00197241	-0.00208425	-0.00241166	-0.002375	-0.00197718	-0.00196372
86009	-0.00198395	-0.0020541	0.00155481	-0.00241373	-0.00197236	-0.00208426	-0.00241163	-0.002375	-0.00197719	-0.00196379		86009	-0.00198395	-0.00205409	0.0015548	-0.00241366	-0.0019724	-0.00208422	-0.00241166	-0.00237495	-0.00197717	-0.00196371		86009	-0.00198397	-0.00205411	0.0015548	-0.00241367	-0.00197241	-0.00208424	-0.00241166	-0.00237495	-0.00197717	-0.00196373		86009	-0.00198398	-0.00205412	0.0015548	-0.00241367	-0.00197241	-0.00208425	-0.00241166	-0.002375	-0.00197718	-0.00196372
86010	-0.00198395	-0.0020541	0.00155481	-0.00241373	-0.00197236	-0.00208426	-0.00241163	-0.002375	-0.00197719	-0.00196379		86010	-0.00198395	-0.00205409	0.0015548	-0.00241366	-0.0019724	-0.00208422	-0.00241166	-0.00237495	-0.00197717	-0.00196371		86010	-0.00198397	-0.00205411	0.0015548	-0.00241367	-0.00197241	-0.00208424	-0.00241166	-0.00237495	-0.00197717	-0.00196373		86010	-0.00198398	-0.00205412	0.0015548	-0.00241367	-0.00197241	-0.00208425	-0.00241166	-0.002375	-0.00197718	-0.00196372
86011	-0.00198395	-0.0020541	0.00155481	-0.00241373	-0.00197236	-0.00208426	-0.00241163	-0.002375	-0.00197719	-0.00196379		86011	-0.00198395	-0.00205409	0.0015548	-0.00241366	-0.0019724	-0.00208422	-0.00241166	-0.00237495	-0.00197717	-0.00196371		86011	-0.00198397	-0.00205411	0.0015548	-0.00241367	-0.00197241	-0.00208424	-0.00241166	-0.00237495	-0.00197717	-0.00196373		86011	-0.00198398	-0.00205412	0.0015548	-0.00241367	-0.00197241	-0.00208425	-0.00241166	-0.002375	-0.00197718	-0.00196372
86012	-0.00198395	-0.0020541	0.00155481	-0.00241373	-0.00197236	-0.00208426	-0.00241163	-0.002375	-0.00197719	-0.00196379		86012	-0.00198395	-0.00205409	0.0015548	-0.00241366	-0.0019724	-0.00208422	-0.00241166	-0.00237495	-0.00197717	-0.00196371		86012	-0.00198397	-0.00205411	0.0015548	-0.00241367	-0.00197241	-0.00208424	-0.00241166	-0.00237495	-0.00197717	-0.00196373		86012	-0.00198398	-0.00205412	0.0015548	-0.00241367	-0.00197241	-0.00208425	-0.00241166	-0.002375	-0.00197718	-0.00196372
86013	-0.00198395	-0.0020541	0.00155481	-0.00241373	-0.00197236	-0.00208426	-0.00241163	-0.002375	-0.00197719	-0.00196379		86013	-0.00198395	-0.00205409	0.0015548	-0.00241366	-0.0019724	-0.00208422	-0.00241166	-0.00237495	-0.00197717	-0.00196371		86013	-0.00198397	-0.00205411	0.0015548	-0.00241367	-0.00197241	-0.00208424	-0.00241166	-0.00237495	-0.00197717	-0.00196373		86013	-0.00198398	-0.00205412	0.0015548	-0.00241367	-0.00197241	-0.00208425	-0.00241165	-0.002375	-0.00197718	-0.00196372
86014	-0.00198395	-0.0020541	0.00155481	-0.00241373	-0.00197236	-0.00208426	-0.00241163	-0.002375	-0.00197719	-0.00196379		86014	-0.00198395	-0.00205409	0.0015548	-0.00241366	-0.0019724	-0.00208422	-0.00241166	-0.00237495	-0.00197717	-0.00196371		86014	-0.00198397	-0.00205411	0.0015548	-0.00241367	-0.00197241	-0.00208424	-0.00241166	-0.00237495	-0.00197717	-0.00196373		86014	-0.00198398	-0.00205412	0.0015548	-0.00241367	-0.00197241	-0.00208425	-0.00241165	-0.002375	-0.00197718	-0.00196372
86015	-0.00198395	-0.0020541	0.00155481	-0.00241373	-0.00197236	-0.00208426	-0.00241163	-0.002375	-0.00197719	-0.00196379		86015	-0.00198395	-0.00205409	0.0015548	-0.00241366	-0.0019724	-0.00208422	-0.00241166	-0.00237495	-0.00197717	-0.00196371		86015	-0.00198397	-0.00205411	0.0015548	-0.00241367	-0.00197241	-0.00208424	-0.00241166	-0.00237495	-0.00197717	-0.00196373		86015	-0.00198398	-0.00205412	0.0015548	-0.00241367	-0.00197241	-0.00208425	-0.00241165	-0.002375	-0.00197718	-0.00196372
86016	-0.00198395	-0.0020541	0.00155481	-0.00241373	-0.00197236	-0.00208426	-0.00241163	-0.002375	-0.00197719	-0.00196379		86016	-0.00198395	-0.00205409	0.0015548	-0.00241366	-0.0019724	-0.00208422	-0.00241166	-0.00237495	-0.00197717	-0.00196371		86016	-0.00198397	-0.00205411	0.0015548	-0.00241367	-0.00197241	-0.00208424	-0.00241166	-0.00237495	-0.00197717	-0.00196373		86016	-0.00198398	-0.00205412	0.0015548	-0.00241367	-0.00197241	-0.00208425	-0.00241165	-0.002375	-0.00197718	-0.00196372
86017	-0.00198395	-0.0020541	0.00155481	-0.00241373	-0.00197236	-0.00208426	-0.00241163	-0.002375	-0.00197719	-0.00196379		86017	-0.00198395	-0.00205409	0.0015548	-0.00241366	-0.0019724	-0.00208422	-0.00241166	-0.00237495	-0.00197717	-0.00196371		86017	-0.00198397	-0.00205411	0.0015548	-0.00241367	-0.00197241	-0.00208424	-0.00241166	-0.00237495	-0.00197717	-0.00196373		86017	-0.00198398	-0.00205412	0.0015548	-0.00241367	-0.00197241	-0.00208425	-0.00241165	-0.002375	-0.00197718	-0.00196372
86018	-0.00198395	-0.0020541	0.00155481	-0.00241373	-0.00197236	-0.00208426	-0.00241163	-0.002375	-0.00197719	-0.00196379		86018	-0.00198395	-0.00205409	0.0015548	-0.00241366	-0.0019724	-0.00208422	-0.00241166	-0.00237495	-0.00197717	-0.00196371		86018	-0.00198397	-0.00205411	0.0015548	-0.00241367	-0.00197241	-0.00208424	-0.00241166	-0.00237495	-0.00197717	-0.00196373		86018	-0.00198398	-0.00205412	0.0015548	-0.00241367	-0.00197241	-0.00208425	-0.00241165	-0.002375	-0.00197718	-0.00196372
86019	-0.00198395	-0.0020541	0.00155481	-0.00241373	-0.00197236	-0.00208426	-0.00241163	-0.002375	-0.00197719	-0.00196379		86019	-0.00198395	-0.00205409	0.0015548	-0.00241366	-0.0019724	-0.00208422	-0.00241166	-0.00237495	-0.00197717	-0.00196371		86019	-0.00198397	-0.00205411	0.0015548	-0.00241367	-0.00197241	-0.00208424	-0.00241166	-0.00237495	-0.00197717	-0.00196373		86019	-0.00198398	-0.00205412	0.0015548	-0.00241367	-0.00197241	-0.00208425	-0.00241165	-0.002375	-0.00197718	-0.00196372
86020	-0.00198395	-0.0020541	0.00155481	-0.00241373	-0.00197236	-0.00208426	-0.00241163	-0.002375	-0.00197719	-0.00196379		86020	-0.00198395	-0.00205409	0.0015548	-0.00241366	-0.0019724	-0.00208422	-0.00241166	-0.00237495	-0.00197717	-0.00196371		86020	-0.00198397	-0.00205411	0.0015548	-0.00241367	-0.00197241	-0.00208424	-0.00241166	-0.00237495	-0.00197717	-0.00196373		86020	-0.00198398	-0.00205412	0.0015548	-0.00241367	-0.00197241	-0.00208425	-0.00241165	-0.002375	-0.00197718	-0.00196372
86021	-0.00198395	-0.0020541	0.00155481	-0.00241373	-0.00197236	-0.00208426	-0.00241163	-0.002375	-0.00197719	-0.00196379		86021	-0.00198395	-0.00205409	0.0015548	-0.00241366	-0.0019724	-0.00208422	-0.00241166	-0.00237495	-0.00197717	-0.00196371		86021	-0.00198397	-0.00205411	0.0015548	-0.00241367	-0.00197241	-0.00208424	-0.00241166	-0.00237495	-0.00197717	-0.00196373		86021	-0.00198398	-0.00205412	0.0015548	-0.00241367	-0.00197241	-0.00208425	-0.00241165	-0.002375	-0.00197718	-0.00196372
86022	-0.00198395	-0.0020541	0.00155481	-0.00241373	-0.00197236	-0.00208426	-0.00241163	-0.002375	-0.00197719	-0.00196379		86022	-0.00198395	-0.00205409	0.0015548	-0.00241366	-0.0019724	-0.00208422	-0.00241166	-0.00237495	-0.00197717	-0.00196371		86022	-0.00198397	-0.00205411	0.0015548	-0.00241367	-0.00197241	-0.00208424	-0.00241166	-0.00237495	-0.00197717	-0.00196373		86022	-0.00198398	-0.00205412	0.0015548	-0.00241367	-0.00197241	-0.00208425	-0.00241165	-0.002375	-0.00197718	-0.00196372
86023	-0.00198395	-0.0020541	0.00155481	-0.00241373	-0.00197236	-0.00208426	-0.00241163	-0.002375	-0.00197719	-0.00196379		86023	-0.00198395	-0.00205409	0.0015548	-0.00241366	-0.0019724	-0.00208422	-0.00241166	-0.00237495	-0.00197717	-0.00196371		86023	-0.00198397	-0.00205411	0.0015548	-0.00241367	-0.00197241	-0.00208424	-0.00241166	-0.00237495	-0.00197717	-0.00196373		86023	-0.00198398	-0.00205412	0.0015548	-0.00241367	-0.00197241	-0.00208425	-0.00241165	-0.002375	-0.00197718	-0.00196372
86024	-0.00198395	-0.0020541	0.00155481	-0.00241373	-0.00197236	-0.00208426	-0.00241163	-0.002375	-0.00197719	-0.00196379		86024	-0.00198395	-0.00205409	0.0015548	-0.00241366	-0.0019724	-0.00208422	-0.00241166	-0.00237495	-0.00197717	-0.00196371		86024	-0.00198397	-0.00205411	0.0015548	-0.00241367	-0.00197241	-0.00208424	-0.00241166	-0.00237495	-0.00197717	-0.00196373		86024	-0.00198398	-0.00205412	0.0015548	-0.00241367	-0.00197241	-0.00208425	-0.00241165	-0.002375	-0.00197718	-0.00196372
86025	-0.00198395	-0.0020541	0.00155481	-0.00241373	-0.00197236	-0.00208426	-0.00241163	-0.002375	-0.00197719	-0.00196379		86025	-0.00198395	-0.00205409	0.0015548	-0.00241366	-0.0019724	-0.00208422	-0.00241166	-0.00237495	-0.00197717	-0.00196371		86025	-0.00198397	-0.00205411	0.0015548	-0.00241367	-0.00197241	-0.00208424	-0.00241166	-0.00237495	-0.00197717	-0.00196373		86025	-0.00198398	-0.00205412	0.0015548	-0.00241367	-0.00197241	-0.00208425	-0.00241165	-0.002375	-0.00197718	-0.00196372
86026	-0.00198395	-0.0020541	0.00155481	-0.00241373	-0.00197236	-0.00208426	-0.00241163	-0.002375	-0.00197719	-0.00196379		86026	-0.00198395	-0.00205409	0.0015548	-0.00241366	-0.0019724	-0.00208422	-0.00241166	-0.00237495	-0.00197717	-0.00196371		86026	-0.00198397	-0.00205411	0.0015548	-0.00241367	-0.00197241	-0.00208424	-0.00241166	-0.00237495	-0.00197717	-0.00196373		86026	-0.00198398	-0.00205412	0.0015548	-0.00241367	-0.00197241	-0.00208425	-0.00241165	-0.002375	-0.00197718	-0.00196372
86027	-0.00198395	-0.0020541	0.00155481	-0.00241373	-0.00197236	-0.00208426	-0.00241163	-0.002375	-0.00197719	-0.00196379		86027	-0.00198395	-0.00205409	0.0015548	-0.00241366	-0.0019724	-0.00208422	-0.00241166	-0.00237495	-0.00197717	-0.00196371		86027	-0.00198397	-0.00205411	0.0015548	-0.00241367	-0.00197241	-0.00208424	-0.00241166	-0.00237495	-0.00197717	-0.00196373		86027	-0.00198398	-0.00205412	0.0015548	-0.00241367	-0.00197241	-0.00208425	-0.00241165	-0.002375	-0.00197718	-0.00196372
86028	-0.00198395	-0.0020541	0.00155481	-0.00241373	-0.00197236	-0.00208426	-0.00241163	-0.002375	-0.00197719	-0.00196379		86028	-0.00198395	-0.00205409	0.0015548	-0.00241366	-0.0019724	-0.00208422	-0.00241166	-0.00237495	-0.00197717	-0.00196371		86028	-0.00198397	-0.00205411	0.0015548	-0.00241367	-0.00197241	-0.00208424	-0.00241166	-0.00237495	-0.00197717	-0.00196373		86028	-0.00198398	-0.00205412	0.0015548	-0.00241367	-0.00197241	-0.00208425	-0.00241165	-0.002375	-0.00197718	-0.00196372
86029	-0.00198395	-0.0020541	0.00155481	-0.00241373	-0.00197236	-0.00208426	-0.00241163	-0.002375	-0.00197719	-0.00196379		86029	-0.00198395	-0.00205409	0.0015548	-0.00241366	-0.0019724	-0.00208422	-0.00241166	-0.00237495	-0.00197717	-0.00196371		86029	-0.00198397	-0.00205411	0.0015548	-0.00241367	-0.00197241	-0.00208424	-0.00241166	-0.00237495	-0.00197717	-0.00196373		86029	-0.00198398	-0.00205412	0.0015548	-0.00241367	-0.00197241	-0.00208425	-0.00241165	-0.002375	-0.00197718	-0.00196372
86030	-0.00198395	-0.0020541	0.00155481	-0.00241373	-0.00197236	-0.00208426	-0.00241163	-0.002375	-0.00197719	-0.00196379		86030	-0.00198395	-0.00205409	0.0015548	-0.00241366	-0.0019724	-0.00208422	-0.00241166	-0.00237495	-0.00197717	-0.00196371		86030	-0.00198397	-0.00205411	0.0015548	-0.00241367	-0.00197241	-0.00208424	-0.00241166	-0.00237495	-0.00197717	-0.00196373		86030	-0.00198398	-0.00205412	0.0015548	-0.00241367	-0.00197241	-0.00208425	-0.00241165	-0.002375	-0.00197718	-0.00196372
86031	-0.00198395	-0.0020541	0.00155481	-0.00241373	-0.00197236	-0.00208426	-0.00241163	-0.002375	-0.00197719	-0.00196379		86031	-0.00198395	-0.00205409	0.0015548	-0.00241366	-0.0019724	-0.00208422	-0.00241166	-0.00237495	-0.00197717	-0.00196371		86031	-0.00198397	-0.00205411	0.0015548	-0.00241367	-0.00197241	-0.00208424	-0.00241166	-0.00237495	-0.00197717	-0.00196373		86031	-0.00198398	-0.00205412	0.0015548	-0.00241367	-0.00197241	-0.00208425	-0.00241165	-0.002375	-0.00197718	-0.00196372
86032	-0.00198395	-0.0020541	0.00155481	-0.00241373	-0.00197236	-0.00208426	-0.00241163	-0.002375	-0.00197719	-0.00196379		86032	-0.00198395	-0.00205409	0.0015548	-0.00241366	-0.0019724	-0.00208422	-0.00241166	-0.00237495	-0.00197717	-0.00196371		86032	-0.00198397	-0.00205411	0.0015548	-0.00241367	-0.00197241	-0.00208424	-0.00241166	-0.00237495	-0.00197717	-0.00196373		86032	-0.00198398	-0.00205412	0.0015548	-0.00241367	-0.00197241	-0.00208425	-0.00241165	-0.002375	-0.00197718	-0.00196372
86033	-0.00198395	-0.0020541	0.00155481	-0.00241373	-0.00197236	-0.00208426	-0.00241163	-0.002375	-0.00197719	-0.00196379		86033	-0.00198395	-0.00205409	0.0015548	-0.00241366	-0.0019724	-0.00208422	-0.00241166	-0.00237495	-0.00197717	-0.00196371		86033	-0.00198397	-0.00205411	0.0015548	-0.00241367	-0.00197241	-0.00208424	-0.00241166	-0.00237495	-0.00197717	-0.00196373		86033	-0.00198398	-0.00205412	0.0015548	-0.00241367	-0.00197241	-0.00208425	-0.00241165	-0.002375	-0.00197718	-0.00196372
86034	-0.00198395	-0.0020541	0.00155481	-0.00241373	-0.00197236	-0.00208426	-0.00241163	-0.002375	-0.00197719	-0.00196379		86034	-0.00198395	-0.00205409	0.0015548	-0.00241366	-0.0019724	-0.00208422	-0.00241166	-0.00237495	-0.00197717	-0.00196371		86034	-0.00198397	-0.00205411	0.0015548	-0.00241367	-0.00197241	-0.00208424	-0.00241166	-0.00237495	-0.00197717	-0.00196373		86034	-0.00198398	-0.00205412	0.0015548	-0.00241367	-0.00197241	-0.00208425	-0.00241165	-0.002375	-0.00197718	-0.00196372
86035	-0.00198395	-0.0020541	0.00155481	-0.00241373	-0.00197236	-0.00208426	-0.00241163	-0.002375	-0.00197719	-0.00196379		86035	-0.00198395	-0.00205409	0.0015548	-0.00241366	-0.0019724	-0.00208422	-0.00241166	-0.00237495	-0.00197717	-0.00196371		86035	-0.00198397	-0.00205411	0.0015548	-0.00241367	-0.00197241	-0.00208424	-0.00241166	-0.00237495	-0.00197717	-0.00196373		86035	-0.00198398	-0.00205412	0.0015548	-0.00241367	-0.00197241	-0.00208425	-0.00241165	-0.002375	-0.00197718	-0.00196372
86036	-0.00198395	-0.0020541	0.00155481	-0.00241373	-0.00197236	-0.00208426	-0.00241163	-0.002375	-0.00197719	-0.00196379		86036	-0.00198395	-0.00205409	0.0015548	-0.00241366	-0.0019724	-0.00208422	-0.00241166	-0.00237495	-0.00197717	-0.00196371		86036	-0.00198397	-0.00205411	0.0015548	-0.00241367	-0.00197241	-0.00208424	-0.00241166	-0.00237495	-0.00197717	-0.00196373		86036	-0.00198398	-0.00205412	0.0015548	-0.00241367	-0.00197241	-0.00208425	-0.00241165	-0.002375	-0.00197718	-0.00196372
86037	-0.00198395	-0.0020541	0.00155481	-0.00241373	-0.00197236	-0.00208426	-0.00241163	-0.002375	-0.00197719	-0.00196379		86037	-0.00198395	-0.00205409	0.0015548	-0.00241366	-0.0019724	-0.00208422	-0.00241166	-0.00237495	-0.00197717	-0.00196371		86037	-0.00198397	-0.00205411	0.0015548	-0.00241367	-0.00197241	-0.00208424	-0.00241166	-0.00237495	-0.00197717	-0.00196373		86037	-0.00198398	-0.00205412	0.0015548	-0.00241367	-0.00197241	-0.00208425	-0.00241165	-0.002375	-0.00197718	-0.00196372
86038	-0.00198395	-0.0020541	0.00155481	-0.00241373	-0.00197236	-0.00208426	-0.00241163	-0.002375	-0.00197719	-0.00196379		86038	-0.00198395	-0.00205409	0.0015548	-0.00241366	-0.0019724	-0.00208422	-0.00241166	-0.00237495	-0.00197717	-0.00196371		86038	-0.00198397	-0.00205411	0.0015548	-0.00241367	-0.00197241	-0.00208424	-0.00241166	-0.00237495	-0.00197717	-0.00196373		86038	-0.00198398	-0.00205412	0.0015548	-0.00241367	-0.00197241	-0.00208425	-0.00241165	-0.002375	-0.00197718	-0.00196372
86039	-0.00198395	-0.0020541	0.00155481	-0.00241373	-0.00197236	-0.00208426	-0.00241163	-0.002375	-0.00197719	-0.00196379		86039	-0.00198395	-0.00205409	0.0015548	-0.00241366	-0.0019724	-0.00208422	-0.00241166	-0.00237495	-0.00197717	-0.00196371		86039	-0.00198397	-0.00205411	0.0015548	-0.00241367	-0.00197241	-0.00208424	-0.00241166	-0.00237495	-0.00197717	-0.00196373		86039	-0.00198398	-0.00205412	0.0015548	-0.00241367	-0.00197241	-0.00208425	-0.00241165	-0.002375	-0.00197718	-0.00196372
86040	-0.00198395	-0.0020541	0.00155481	-0.00241373	-0.00197236	-0.00208426	-0.00241163	-0.002375	-0.00197719	-0.00196379		86040	-0.00198395	-0.00205409	0.0015548	-0.00241366	-0.0019724	-0.00208422	-0.00241166	-0.00237495	-0.00197717	-0.00196371		86040	-0.00198397	-0.00205411	0.0015548	-0.00241367	-0.00197241	-0.00208424	-0.00241166	-0.00237495	-0.00197717	-0.00196373		86040	-0.00198398	-0.00205412	0.0015548	-0.00241367	-0.00197241	-0.00208425	-0.00241165	-0.002375	-0.00197718	-0.00196372
86041	-0.00198395	-0.0020541	0.00155481	-0.00241373	-0.00197236	-0.00208426	-0.00241163	-0.002375	-0.00197719	-0.00196379		86041	-0.00198395	-0.00205409	0.0015548	-0.00241366	-0.0019724	-0.00208422	-0.00241166	-0.00237495	-0.00197717	-0.00196371		86041	-0.00198397	-0.00205411	0.0015548	-0.00241367	-0.00197241	-0.00208424	-0.00241166	-0.00237495	-0.00197717	-0.00196373		86041	-0.00198398	-0.00205412	0.0015548	-0.00241367	-0.00197241	-0.00208425	-0.00241165	-0.002375	-0.00197718	-0.00196372
86042	-0.00198395	-0.0020541	0.00155481	-0.00241373	-0.00197236	-0.00208426	-0.00241163	-0.002375	-0.00197719	-0.00196379		86042	-0.00198395	-0.00205409	0.0015548	-0.00241366	-0.0019724	-0.00208422	-0.00241166	-0.00237495	-0.00197717	-0.00196371		86042	-0.00198397	-0.00205411	0.0015548	-0.00241367	-0.00197241	-0.00208424	-0.00241166	-0.00237495	-0.00197717	-0.00196373		86042	-0.00198398	-0.00205412	0.0015548	-0.00241367	-0.00197241	-0.00208425	-0.00241165	-0.002375	-0.00197718	-0.00196372
86043	-0.00198395	-0.0020541	0.00155481	-0.00241373	-0.00197236	-0.00208426	-0.00241163	-0.002375	-0.00197719	-0.00196379		86043	-0.00198395	-0.00205409	0.0015548	-0.00241366	-0.0019724	-0.00208422	-0.00241166	-0.00237495	-0.00197717	-0.00196371		86043	-0.00198397	-0.00205411	0.0015548	-0.00241367	-0.00197241	-0.00208424	-0.00241166	-0.00237495	-0.00197717	-0.00196373		86043	-0.00198398	-0.00205412	0.0015548	-0.00241367	-0.00197241	-0.00208425	-0.00241165	-0.002375	-0.00197718	-0.00196372
86044	-0.00198395	-0.0020541	0.00155481	-0.00241373	-0.00197236	-0.00208426	-0.00241163	-0.002375	-0.00197719	-0.00196379		86044	-0.00198395	-0.00205409	0.0015548	-0.00241366	-0.0019724	-0.00208422	-0.00241166	-0.00237495	-0.00197717	-0.00196371		86044	-0.00198397	-0.00205411	0.0015548	-0.00241367	-0.00197241	-0.00208424	-0.00241166	-0.00237495	-0.00197717	-0.00196373		86044	-0.00198398	-0.00205412	0.0015548	-0.00241367	-0.00197241	-0.00208425	-0.00241165	-0.002375	-0.00197718	-0.00196372
86045	-0.00198395	-0.0020541	0.00155481	-0.00241373	-0.00197236	-0.00208426	-0.00241163	-0.002375	-0.00197719	-0.00196379		86045	-0.00198395	-0.00205409	0.0015548	-0.00241366	-0.0019724	-0.00208422	-0.00241166	-0.00237495	-0.00197717	-0.00196371		86045	-0.00198397	-0.00205411	0.0015548	-0.00241367	-0.00197241	-0.00208424	-0.00241166	-0.00237495	-0.00197717	-0.00196373		86045	-0.00198398	-0.00205412	0.0015548	-0.00241367	-0.00197241	-0.00208425	-0.00241165	-0.002375	-0.00197718	-0.00196372
86046	-0.00198395	-0.0020541	0.00155481	-0.00241373	-0.00197236	-0.00208426	-0.00241163	-0.002375	-0.00197719	-0.00196379		86046	-0.00198395	-0.00205409	0.0015548	-0.00241366	-0.0019724	-0.00208422	-0.00241166	-0.00237495	-0.00197717	-0.00196371		86046	-0.00198397	-0.00205411	0.0015548	-0.00241367	-0.00197241	-0.00208424	-0.00241166	-0.00237495	-0.00197717	-0.00196373		86046	-0.00198398	-0.00205412	0.0015548	-0.00241367	-0.00197241	-0.00208425	-0.00241165	-0.002375	-0.00197718	-0.00196372
86047	-0.00198395	-0.0020541	0.00155481	-0.00241373	-0.00197236	-0.00208426	-0.00241163	-0.002375	-0.00197719	-0.00196379		86047	-0.00198395	-0.00205409	0.0015548	-0.00241366	-0.0019724	-0.00208422	-0.00241166	-0.00237495	-0.00197717	-0.00196371		86047	-0.00198397	-0.00205411	0.0015548	-0.00241367	-0.00197241	-0.00208424	-0.00241166	-0.00237495	-0.00197717	-0.00196373		86047	-0.00198398	-0.00205412	0.0015548	-0.00241367	-0.00197241	-0.00208425	-0.00241165	-0.002375	-0.00197718	-0.00196372
86048	-0.00198395	-0.0020541	0.00155481	-0.00241373	-0.00197236	-0.00208426	-0.00241163	-0.002375	-0.00197719	-0.00196379		86048	-0.00198395	-0.00205409	0.0015548	-0.00241366	-0.0019724	-0.00208422	-0.00241166	-0.00237495	-0.00197717	-0.00196371		86048	-0.00198397	-0.00205411	0.0015548	-0.00241367	-0.00197241	-0.00208424	-0.00241166	-0.00237495	-0.00197717	-0.00196373		86048	-0.00198398	-0.00205412	0.0015548	-0.00241367	-0.00197241	-0.00208425	-0.00241165	-0.002375	-0.00197718	-0.00196372
86049	-0.00198395	-0.0020541	0.00155481	-0.00241373	-0.00197236	-0.00208426	-0.00241163	-0.002375	-0.00197719	-0.00196379		86049	-0.00198395	-0.00205409	0.0015548	-0.00241366	-0.0019724	-0.00208422	-0.00241166	-0.00237495	-0.00197717	-0.00196371		86049	-0.00198397	-0.00205411	0.0015548	-0.00241367	-0.00197241	-0.00208424	-0.00241166	-0.00237495	-0.00197717	-0.00196373		86049	-0.00198398	-0.00205412	0.0015548	-0.00241367	-0.00197241	-0.00208425	-0.00241165	-0.002375	-0.00197718	-0.00196372
86050	-0.00198395	-0.0020541	0.00155481	-0.00241373	-0.00197236	-0.00208426	-0.00241163	-0.002375	-0.00197719	-0.00196379		86050	-0.00198395	-0.00205409	0.0015548	-0.00241366	-0.0019724	-0.00208422	-0.00241166	-0.00237495	-0.00197717	-0.00196371		86050	-0.00198397	-0.00205411	0.0015548	-0.00241367	-0.00197241	-0.00208424	-0.00241166	-0.00237495	-0.00197717	-0.00196373		86050	-0.00198398	-0.00205412	0.0015548	-0.00241367	-0.00197241	-0.00208425	-0.00241165	-0.002375	-0.00197718	-0.00196372
86051	-0.00198395	-0.0020541	0.00155481	-0.00241373	-0.00197236	-0.00208426	-0.00241163	-0.002375	-0.00197719	-0.00196379		86051	-0.00198395	-0.00205409	0.0015548	-0.00241366	-0.0019724	-0.00208422	-0.00241166	-0.00237495	-0.00197717	-0.00196371		86051	-0.00198397	-0.00205411	0.0015548	-0.00241367	-0.00197241	-0.00208424	-0.00241166	-0.00237495	-0.00197717	-0.00196373		86051	-0.00198398	-0.00205412	0.0015548	-0.00241367	-0.00197241	-0.00208425	-0.00241165	-0.002375	-0.00197718	-0.00196372
86052	-0.00198395	-0.0020541	0.00155481	-0.00241373	-0.00197236	-0.00208426	-0.00241163	-0.002375	-0.00197719	-0.00196379		86052	-0.00198395	-0.00205409	0.0015548	-0.00241366	-0.0019724	-0.00208422	-0.00241166	-0.00237495	-0.00197717	-0.00196371		86052	-0.00198397	-0.00205411	0.0015548	-0.00241367	-0.00197241	-0.00208424	-0.00241166	-0.00237495	-0.00197717	-0.00196373		86052	-0.00198398	-0.00205412	0.0015548	-0.00241367	-0.00197241	-0.00208425	-0.00241165	-0.002375	-0.00197718	-0.00196372
86053	-0.00198395	-0.0020541	0.00155481	-0.00241373	-0.00197236	-0.00208426	-0.00241163	-0.002375	-0.00197719	-0.00196379		86053	-0.00198395	-0.00205409	0.0015548	-0.00241366	-0.0019724	-0.00208422	-0.00241166	-0.00237495	-0.00197717	-0.00196371		86053	-0.00198397	-0.00205411	0.0015548	-0.00241367	-0.00197241	-0.00208424	-0.00241166	-0.00237495	-0.00197717	-0.00196373		86053	-0.00198398	-0.00205412	0.0015548	-0.00241367	-0.00197241	-0.00208425	-0.00241165	-0.002375	-0.00197718	-0.00196372
86054	-0.00198395	-0.0020541	0.00155481	-0.00241373	-0.00197236	-0.00208426	-0.00241163	-0.002375	-0.00197719	-0.00196379		86054	-0.00198395	-0.00205409	0.0015548	-0.00241366	-0.0019724	-0.00208422	-0.00241166	-0.00237495	-0.00197717	-0.00196371		86054	-0.00198397	-0.00205411	0.0015548	-0.00241367	-0.00197241	-0.00208424	-0.00241166	-0.00237495	-0.00197717	-0.00196373		86054	-0.00198398	-0.00205412	0.0015548	-0.00241367	-0.00197241	-0.00208425	-0.00241165	-0.002375	-0.00197718	-0.00196372
86055	-0.00198395	-0.0020541	0.00155481	-0.00241373	-0.00197236	-0.00208426	-0.00241163	-0.002375	-0.00197719	-0.00196379		86055	-0.00198395	-0.00205409	0.0015548	-0.00241366	-0.0019724	-0.00208422	-0.00241166	-0.00237495	-0.00197717	-0.00196371		86055	-0.00198397	-0.00205411	0.0015548	-0.00241367	-0.00197241	-0.00208424	-0.00241166	-0.00237495	-0.00197717	-0.00196373		86055	-0.00198398	-0.00205412	0.0015548	-0.00241367	-0.00197241	-0.00208425	-0.00241165	-0.002375	-0.00197718	-0.00196372
86056	-0.00198395	-0.0020541	0.00155481	-0.00241373	-0.00197236	-0.00208426	-0.00241163	-0.002375	-0.00197719	-0.00196379		86056	-0.00198395	-0.00205409	0.0015548	-0.00241366	-0.0019724	-0.00208422	-0.00241166	-0.00237495	-0.00197717	-0.00196371		86056	-0.00198397	-0.00205411	0.0015548	-0.00241367	-0.00197241	-0.00208424	-0.00241166	-0.00237495	-0.00197717	-0.00196373		86056	-0.00198398	-0.00205412	0.0015548	-0.00241367	-0.00197241	-0.00208425	-0.00241165	-0.002375	-0.00197718	-0.00196372
86057	-0.00198395	-0.0020541	0.00155481	-0.00241373	-0.00197236	-0.00208426	-0.00241163	-0.002375	-0.00197719	-0.00196379		86057	-0.00198395	-0.00205409	0.0015548	-0.00241366	-0.0019724	-0.00208422	-0.00241166	-0.00237495	-0.00197717	-0.00196371		86057	-0.00198397	-0.00205411	0.0015548	-0.00241367	-0.00197241	-0.00208424	-0.00241166	-0.00237495	-0.00197717	-0.00196373		86057	-0.00198398	-0.00205412	0.0015548	-0.00241367	-0.00197241	-0.00208425	-0.00241165	-0.002375	-0.00197718	-0.00196372
86058	-0.00198395	-0.0020541	0.00155481	-0.00241373	-0.00197236	-0.00208426	-0.00241163	-0.002375	-0.00197719	-0.00196379		86058	-0.00198395	-0.00205409	0.0015548	-0.00241366	-0.0019724	-0.00208422	-0.00241166	-0.00237495	-0.00197717	-0.00196371		86058	-0.00198397	-0.00205411	0.0015548	-0.00241367	-0.00197241	-0.00208424	-0.00241166	-0.00237495	-0.00197717	-0.00196373		86058	-0.00198398	-0.00205412	0.0015548	-0.00241367	-0.00197241	-0.00208425	-0.00241165	-0.002375	-0.00197718	-0.00196372
86059	-0.00198395	-0.0020541	0.00155481	-0.00241373	-0.00197236	-0.00208426	-0.00241163	-0.002375	-0.00197719	-0.00196379		86059	-0.00198395	-0.00205409	0.0015548	-0.00241366	-0.0019724	-0.00208422	-0.00241166	-0.00237495	-0.00197717	-0.00196371		86059	-0.00198397	-0.00205411	0.0015548	-0.00241367	-0.00197241	-0.00208424	-0.00241166	-0.00237495	-0.00197717	-0.00196373		86059	-0.00198398	-0.00205412	0.0015548	-0.00241367	-0.00197241	-0.00208425	-0.00241165	-0.002375	-0.00197718	-0.00196372
86060	-0.00198395	-0.0020541	0.00155481	-0.00241373	-0.00197236	-0.00208426	-0.00241163	-0.002375	-0.00197719	-0.00196379		86060	-0.00198395	-0.00205409	0.0015548	-0.00241366	-0.0019724	-0.00208422	-0.00241166	-0.00237495	-0.00197717	-0.00196371		86060	-0.00198397	-0.00205411	0.0015548	-0.00241367	-0.00197241	-0.00208424	-0.00241166	-0.00237495	-0.00197717	-0.00196373		86060	-0.00198398	-0.00205412	0.0015548	-0.00241367	-0.00197241	-0.00208425	-0.00241165	-0.002375	-0.00197718	-0.00196372
86061	-0.00198395	-0.0020541	0.00155481	-0.00241373	-0.00197236	-0.00208426	-0.00241163	-0.002375	-0.00197719	-0.00196379		86061	-0.00198395	-0.00205409	0.0015548	-0.00241366	-0.0019724	-0.00208422	-0.00241166	-0.00237495	-0.00197717	-0.00196371		86061	-0.00198397	-0.00205411	0.0015548	-0.00241367	-0.00197241	-0.00208424	-0.00241166	-0.00237495	-0.00197717	-0.00196373		86061	-0.00198398	-0.00205412	0.0015548	-0.00241367	-0.00197241	-0.00208425	-0.00241165	-0.002375	-0.00197718	-0.00196372
86062	-0.00198395	-0.0020541	0.00155481	-0.00241373	-0.00197236	-0.00208426	-0.00241163	-0.002375	-0.00197719	-0.00196379		86062	-0.00198395	-0.00205409	0.0015548	-0.00241366	-0.0019724	-0.00208422	-0.00241166	-0.00237495	-0.00197717	-0.00196371		86062	-0.00198397	-0.00205411	0.0015548	-0.00241367	-0.00197241	-0.00208424	-0.00241166	-0.00237495	-0.00197717	-0.00196373		86062	-0.00198398	-0.00205412	0.0015548	-0.00241367	-0.00197241	-0.00208425	-0.00241165	-0.002375	-0.00197718	-0.00196372
86063	-0.00198395	-0.0020541	0.00155481	-0.00241373	-0.00197236	-0.00208426	-0.00241163	-0.002375	-0.00197719	-0.00196379		86063	-0.00198395	-0.00205409	0.0015548	-0.00241366	-0.0019724	-0.00208422	-0.00241166	-0.00237495	-0.00197717	-0.00196371		86063	-0.00198397	-0.00205411	0.0015548	-0.00241367	-0.00197241	-0.00208424	-0.00241166	-0.00237495	-0.00197717	-0.00196373		86063	-0.00198398	-0.00205412	0.0015548	-0.00241367	-0.00197241	-0.00208425	-0.00241165	-0.002375	-0.00197718	-0.00196372
86064	-0.00198395	-0.0020541	0.00155481	-0.00241373	-0.00197236	-0.00208426	-0.00241163	-0.002375	-0.00197719	-0.00196379		86064	-0.00198395	-0.00205409	0.0015548	-0.00241366	-0.0019724	-0.00208422	-0.00241166	-0.00237495	-0.00197717	-0.00196371		86064	-0.00198397	-0.00205411	0.0015548	-0.00241367	-0.00197241	-0.00208424	-0.00241166	-0.00237495	-0.00197717	-0.00196373		86064	-0.00198398	-0.00205412	0.0015548	-0.00241367	-0.00197241	-0.00208425	-0.00241165	-0.002375	-0.00197718	-0.00196372
86065	-0.00198395	-0.0020541	0.00155481	-0.00241373	-0.00197236	-0.00208426	-0.00241163	-0.002375	-0.00197719	-0.00196379		86065	-0.00198395	-0.00205409	0.0015548	-0.00241366	-0.0019724	-0.00208422	-0.00241166	-0.00237495	-0.00197717	-0.00196371		86065	-0.00198397	-0.00205411	0.0015548	-0.00241367	-0.00197241	-0.00208424	-0.00241166	-0.00237495	-0.00197717	-0.00196373		86065	-0.00198398	-0.00205412	0.0015548	-0.00241367	-0.00197241	-0.00208425	-0.00241165	-0.002375	-0.00197718	-0.00196372
86066	-0.00198395	-0.0020541	0.00155481	-0.00241373	-0.00197236	-0.00208426	-0.00241163	-0.002375	-0.00197719	-0.00196379		86066	-0.00198395	-0.00205409	0.0015548	-0.00241366	-0.0019724	-0.00208422	-0.00241166	-0.00237495	-0.00197717	-0.00196371		86066	-0.00198397	-0.00205411	0.0015548	-0.00241367	-0.00197241	-0.00208424	-0.00241166	-0.00237495	-0.00197717	-0.00196373		86066	-0.00198398	-0.00205412	0.0015548	-0.00241367	-0.00197241	-0.00208425	-0.00241165	-0.002375	-0.00197718	-0.00196372
86067	-0.00198395	-0.0020541	0.00155481	-0.00241373	-0.00197236	-0.00208426	-0.00241163	-0.002375	-0.00197719	-0.00196379		86067	-0.00198395	-0.00205409	0.0015548	-0.00241366	-0.0019724	-0.00208422	-0.00241166	-0.00237495	-0.00197717	-0.00196371		86067	-0.00198397	-0.00205411	0.0015548	-0.00241367	-0.00197241	-0.00208424	-0.00241166	-0.00237495	-0.00197717	-0.00196373		86067	-0.00198398	-0.00205412	0.0015548	-0.00241367	-0.00197241	-0.00208425	-0.00241165	-0.002375	-0.00197718	-0.00196372
86068	-0.00198395	-0.0020541	0.00155481	-0.00241373	-0.00197236	-0.00208426	-0.00241163	-0.002375	-0.00197719	-0.00196379		86068	-0.00198395	-0.00205409	0.0015548	-0.00241366	-0.0019724	-0.00208422	-0.00241166	-0.00237495	-0.00197717	-0.00196371		86068	-0.00198397	-0.00205411	0.0015548	-0.00241367	-0.00197241	-0.00208424	-0.00241166	-0.00237495	-0.00197717	-0.00196373		86068	-0.00198398	-0.00205412	0.0015548	-0.00241367	-0.00197241	-0.00208425	-0.00241165	-0.002375	-0.00197718	-0.00196372
86069	-0.00198395	-0.0020541	0.00155481	-0.00241373	-0.00197236	-0.00208426	-0.00241163	-0.002375	-0.00197719	-0.00196379		86069	-0.00198395	-0.00205409	0.0015548	-0.00241366	-0.0019724	-0.00208422	-0.00241166	-0.00237495	-0.00197717	-0.00196371		86069	-0.00198397	-0.00205411	0.0015548	-0.00241367	-0.00197241	-0.00208424	-0.00241166	-0.00237495	-0.00197717	-0.00196373		86069	-0.00198398	-0.00205412	0.0015548	-0.00241367	-0.00197241	-0.00208425	-0.00241165	-0.002375	-0.00197718	-0.00196372
86070	-0.00198395	-0.0020541	0.00155481	-0.00241373	-0.00197236	-0.00208426	-0.00241163	-0.002375	-0.00197719	-0.00196379		86070	-0.00198395	-0.00205409	0.0015548	-0.00241366	-0.0019724	-0.00208422	-0.00241166	-0.00237495	-0.00197717	-0.00196371		86070	-0.00198397	-0.00205411	0.0015548	-0.00241367	-0.00197241	-0.00208424	-0.00241166	-0.00237495	-0.00197717	-0.00196373		86070	-0.00198398	-0.00205412	0.0015548	-0.00241367	-0.00197241	-0.00208425	-0.00241165	-0.002375	-0.00197718	-0.00196372
86071	-0.00198395	-0.0020541	0.00155481	-0.00241373	-0.00197236	-0.00208426	-0.00241163	-0.002375	-0.00197719	-0.00196379		86071	-0.00198395	-0.00205409	0.0015548	-0.00241366	-0.0019724	-0.00208422	-0.00241166	-0.00237495	-0.00197717	-0.00196371		86071	-0.00198397	-0.00205411	0.0015548	-0.00241367	-0.00197241	-0.00208424	-0.00241166	-0.00237495	-0.00197717	-0.00196373		86071	-0.00198398	-0.00205412	0.0015548	-0.00241367	-0.00197241	-0.00208425	-0.00241165	-0.002375	-0.00197718	-0.00196372
86072	-0.00198395	-0.0020541	0.00155481	-0.00241373	-0.00197236	-0.00208426	-0.00241163	-0.002375	-0.00197719	-0.00196379		86072	-0.00198395	-0.00205409	0.0015548	-0.00241366	-0.0019724	-0.00208422	-0.00241166	-0.00237495	-0.00197717	-0.00196371		86072	-0.00198397	-0.00205411	0.0015548	-0.00241367	-0.00197241	-0.00208424	-0.00241166	-0.00237495	-0.00197717	-0.00196373		86072	-0.00198398	-0.00205412	0.0015548	-0.00241367	-0.00197241	-0.00208425	-0.00241165	-0.002375	-0.00197718	-0.00196372
86073	-0.00198395	-0.0020541	0.00155481	-0.00241373	-0.00197236	-0.00208426	-0.00241163	-0.002375	-0.00197719	-0.00196379		86073	-0.00198395	-0.00205409	0.0015548	-0.00241366	-0.0019724	-0.00208422	-0.00241166	-0.00237495	-0.00197717	-0.00196371		86073	-0.00198397	-0.00205411	0.0015548	-0.00241367	-0.00197241	-0.00208424	-0.00241166	-0.00237495	-0.00197717	-0.00196373		86073	-0.00198398	-0.00205412	0.0015548	-0.00241367	-0.00197241	-0.00208425	-0.00241165	-0.002375	-0.00197718	-0.00196372
86074	-0.00198395	-0.0020541	0.00155481	-0.00241373	-0.00197236	-0.00208426	-0.00241163	-0.002375	-0.00197719	-0.00196379		86074	-0.00198395	-0.00205409	0.0015548	-0.00241366	-0.0019724	-0.00208422	-0.00241166	-0.00237495	-0.00197717	-0.00196371		86074	-0.00198397	-0.00205411	0.0015548	-0.00241367	-0.00197241	-0.00208424	-0.00241166	-0.00237495	-0.00197717	-0.00196373		86074	-0.00198398	-0.00205412	0.0015548	-0.00241367	-0.00197241	-0.00208425	-0.00241165	-0.002375	-0.00197718	-0.00196372
86075	-0.00198395	-0.0020541	0.00155481	-0.00241373	-0.00197236	-0.00208426	-0.00241163	-0.002375	-0.00197719	-0.00196379		86075	-0.00198395	-0.00205409	0.0015548	-0.00241366	-0.0019724	-0.00208422	-0.00241166	-0.00237495	-0.00197717	-0.00196371		86075	-0.00198397	-0.00205411	0.0015548	-0.00241367	-0.00197241	-0.00208424	-0.00241166	-0.00237495	-0.00197717	-0.00196373		86075	-0.00198398	-0.00205412	0.0015548	-0.00241367	-0.00197241	-0.00208425	-0.00241165	-0.002375	-0.00197718	-0.00196372
86076	-0.00198395	-0.0020541	0.00155481	-0.00241373	-0.00197236	-0.00208426	-0.00241163	-0.002375	-0.00197719	-0.00196379		86076	-0.00198395	-0.00205409	0.0015548	-0.00241366	-0.0019724	-0.00208422	-0.00241166	-0.00237495	-0.00197717	-0.00196371		86076	-0.00198397	-0.00205411	0.0015548	-0.00241367	-0.00197241	-0.00208424	-0.00241166	-0.00237495	-0.00197717	-0.00196373		86076	-0.00198398	-0.00205412	0.0015548	-0.00241367	-0.00197241	-0.00208425	-0.00241165	-0.002375	-0.00197718	-0.00196372
86077	-0.00198395	-0.0020541	0.00155481	-0.00241373	-0.00197236	-0.00208426	-0.00241163	-0.002375	-0.00197719	-0.00196379		86077	-0.00198395	-0.00205409	0.0015548	-0.00241366	-0.0019724	-0.00208422	-0.00241166	-0.00237495	-0.00197717	-0.00196371		86077	-0.00198397	-0.00205411	0.0015548	-0.00241367	-0.00197241	-0.00208424	-0.00241166	-0.00237495	-0.00197717	-0.00196373		86077	-0.00198398	-0.00205412	0.0015548	-0.00241367	-0.00197241	-0.00208425	-0.00241165	-0.002375	-0.00197718	-0.00196372
86078	-0.00198395	-0.0020541	0.00155481	-0.00241373	-0.00197236	-0.00208426	-0.00241163	-0.002375	-0.00197719	-0.00196379		86078	-0.00198395	-0.00205409	0.0015548	-0.00241366	-0.0019724	-0.00208422	-0.00241166	-0.00237495	-0.00197717	-0.00196371		86078	-0.00198397	-0.00205411	0.0015548	-0.00241367	-0.00197241	-0.00208424	-0.00241166	-0.00237495	-0.00197717	-0.00196373		86078	-0.00198398	-0.00205412	0.0015548	-0.00241367	-0.00197241	-0.00208425	-0.00241165	-0.002375	-0.00197718	-0.00196372
86079	-0.00198395	-0.0020541	0.00155481	-0.00241373	-0.00197236	-0.00208426	-0.00241163	-0.002375	-0.00197719	-0.00196379		86079	-0.00198395	-0.00205409	0.0015548	-0.00241366	-0.0019724	-0.00208422	-0.00241166	-0.00237495	-0.00197717	-0.00196371		86079	-0.00198397	-0.00205411	0.0015548	-0.00241367	-0.00197241	-0.00208424	-0.00241166	-0.00237495	-0.00197717	-0.00196373		86079	-0.00198398	-0.00205412	0.0015548	-0.00241367	-0.00197241	-0.00208425	-0.00241165	-0.002375	-0.00197718	-0.00196372
86080	-0.00198395	-0.0020541	0.00155481	-0.00241373	-0.00197236	-0.00208426	-0.00241163	-0.002375	-0.00197719	-0.00196379		86080	-0.00198395	-0.00205409	0.0015548	-0.00241366	-0.0019724	-0.00208422	-0.00241166	-0.00237495	-0.00197717	-0.00196371		86080	-0.00198397	-0.00205411	0.0015548	-0.00241367	-0.00197241	-0.00208424	-0.00241166	-0.00237495	-0.00197717	-0.00196373		86080	-0.00198398	-0.00205412	0.0015548	-0.00241367	-0.00197241	-0.00208425	-0.00241165	-0.002375	-0.00197718	-0.00196372
86081	-0.00198395	-0.0020541	0.00155481	-0.00241373	-0.00197236	-0.00208426	-0.00241163	-0.002375	-0.00197719	-0.00196379		86081	-0.00198395	-0.00205409	0.0015548	-0.00241366	-0.0019724	-0.00208422	-0.00241166	-0.00237495	-0.00197717	-0.00196371		86081	-0.00198397	-0.00205411	0.0015548	-0.00241367	-0.00197241	-0.00208424	-0.00241166	-0.00237495	-0.00197717	-0.00196373		86081	-0.00198398	-0.00205412	0.0015548	-0.00241367	-0.00197241	-0.00208425	-0.00241165	-0.002375	-0.00197718	-0.00196372
86082	-0.00198395	-0.0020541	0.00155481	-0.00241373	-0.00197236	-0.00208426	-0.00241163	-0.002375	-0.00197719	-0.00196379		86082	-0.00198395	-0.00205409	0.0015548	-0.00241366	-0.0019724	-0.00208422	-0.00241166	-0.00237495	-0.00197717	-0.00196371		86082	-0.00198397	-0.00205411	0.0015548	-0.00241367	-0.00197241	-0.00208424	-0.00241166	-0.00237495	-0.00197717	-0.00196373		86082	-0.00198398	-0.00205412	0.0015548	-0.00241367	-0.00197241	-0.00208425	-0.00241165	-0.002375	-0.00197718	-0.00196372
86083	-0.00198395	-0.0020541	0.00155481	-0.00241373	-0.00197236	-0.00208426	-0.00241163	-0.002375	-0.00197719	-0.00196379		86083	-0.00198395	-0.00205409	0.0015548	-0.00241366	-0.0019724	-0.00208422	-0.00241166	-0.00237495	-0.00197717	-0.00196371		86083	-0.00198397	-0.00205411	0.0015548	-0.00241367	-0.00197241	-0.00208424	-0.00241166	-0.00237495	-0.00197717	-0.00196373		86083	-0.00198398	-0.00205412	0.0015548	-0.00241367	-0.00197241	-0.00208425	-0.00241165	-0.002375	-0.00197718	-0.00196372
86084	-0.00198395	-0.0020541	0.00155481	-0.00241373	-0.00197236	-0.00208426	-0.00241163	-0.002375	-0.00197719	-0.00196379		86084	-0.00198395	-0.00205409	0.0015548	-0.00241366	-0.0019724	-0.00208422	-0.00241166	-0.00237495	-0.00197717	-0.00196371		86084	-0.00198397	-0.00205411	0.0015548	-0.00241367	-0.00197241	-0.00208424	-0.00241166	-0.00237495	-0.00197717	-0.00196373		86084	-0.00198398	-0.00205412	0.0015548	-0.00241367	-0.00197241	-0.00208425	-0.00241165	-0.002375	-0.00197718	-0.00196372
86085	-0.00198395	-0.0020541	0.00155481	-0.00241373	-0.00197236	-0.00208426	-0.00241163	-0.002375	-0.00197719	-0.00196379		86085	-0.00198395	-0.00205409	0.0015548	-0.00241366	-0.0019724	-0.00208422	-0.00241166	-0.00237495	-0.00197717	-0.00196371		86085	-0.00198397	-0.00205411	0.0015548	-0.00241367	-0.00197241	-0.00208424	-0.00241166	-0.00237495	-0.00197717	-0.00196373		86085	-0.00198398	-0.00205412	0.0015548	-0.00241367	-0.00197241	-0.00208425	-0.00241165	-0.002375	-0.00197718	-0.00196372
86086	-0.00198395	-0.0020541	0.00155481	-0.00241373	-0.00197236	-0.00208426	-0.00241163	-0.002375	-0.00197719	-0.00196379		86086	-0.00198395	-0.00205409	0.0015548	-0.00241366	-0.0019724	-0.00208422	-0.00241166	-0.00237495	-0.00197717	-0.00196371		86086	-0.00198397	-0.00205411	0.0015548	-0.00241367	-0.00197241	-0.00208424	-0.00241166	-0.00237495	-0.00197717	-0.00196373		86086	-0.00198398	-0.00205412	0.0015548	-0.00241367	-0.00197241	-0.00208425	-0.00241165	-0.002375	-0.00197718	-0.00196372
86087	-0.00198395	-0.0020541	0.00155481	-0.00241373	-0.00197236	-0.00208426	-0.00241163	-0.002375	-0.00197719	-0.00196379		86087	-0.00198395	-0.00205409	0.0015548	-0.00241366	-0.0019724	-0.00208422	-0.00241166	-0.00237495	-0.00197717	-0.00196371		86087	-0.00198397	-0.00205411	0.0015548	-0.00241367	-0.00197241	-0.00208424	-0.00241166	-0.00237495	-0.00197717	-0.00196373		86087	-0.00198398	-0.00205412	0.0015548	-0.00241367	-0.00197241	-0.00208425	-0.00241165	-0.002375	-0.00197718	-0.00196372
86088	-0.00198395	-0.0020541	0.00155481	-0.00241373	-0.00197236	-0.00208426	-0.00241163	-0.002375	-0.00197719	-0.00196379		86088	-0.00198395	-0.00205409	0.0015548	-0.00241366	-0.0019724	-0.00208422	-0.00241166	-0.00237495	-0.00197717	-0.00196371		86088	-0.00198397	-0.00205411	0.0015548	-0.00241367	-0.00197241	-0.00208424	-0.00241166	-0.00237495	-0.00197717	-0.00196373		86088	-0.00198398	-0.00205412	0.0015548	-0.00241367	-0.00197241	-0.00208425	-0.00241165	-0.002375	-0.00197718	-0.00196372
86089	-0.00198395	-0.0020541	0.00155481	-0.00241373	-0.00197236	-0.00208426	-0.00241163	-0.002375	-0.00197719	-0.00196379		86089	-0.00198395	-0.00205409	0.0015548	-0.00241366	-0.0019724	-0.00208422	-0.00241166	-0.00237495	-0.00197717	-0.00196371		86089	-0.00198397	-0.00205411	0.0015548	-0.00241367	-0.00197241	-0.00208424	-0.00241166	-0.00237495	-0.00197717	-0.00196373		86089	-0.00198398	-0.00205412	0.0015548	-0.00241367	-0.00197241	-0.00208425	-0.00241165	-0.002375	-0.00197718	-0.00196372
86090	-0.00198395	-0.0020541	0.00155481	-0.00241373	-0.00197236	-0.00208426	-0.00241163	-0.002375	-0.00197719	-0.00196379		86090	-0.00198395	-0.00205409	0.0015548	-0.00241366	-0.0019724	-0.00208422	-0.00241166	-0.00237495	-0.00197717	-0.00196371		86090	-0.00198397	-0.00205411	0.0015548	-0.00241367	-0.00197241	-0.00208424	-0.00241166	-0.00237495	-0.00197717	-0.00196373		86090	-0.00198398	-0.00205412	0.0015548	-0.00241367	-0.00197241	-0.00208425	-0.00241165	-0.002375	-0.00197718	-0.00196372
86091	-0.00198395	-0.0020541	0.00155481	-0.00241373	-0.00197236	-0.00208426	-0.00241163	-0.002375	-0.00197719	-0.00196379		86091	-0.00198395	-0.00205409	0.0015548	-0.00241366	-0.0019724	-0.00208422	-0.00241166	-0.00237495	-0.00197717	-0.00196371		86091	-0.00198397	-0.00205411	0.0015548	-0.00241367	-0.00197241	-0.00208424	-0.00241166	-0.00237495	-0.00197717	-0.00196373		86091	-0.00198398	-0.00205412	0.0015548	-0.00241367	-0.00197241	-0.00208425	-0.00241165	-0.002375	-0.00197718	-0.00196372
86092	-0.00198395	-0.0020541	0.00155481	-0.00241373	-0.00197236	-0.00208426	-0.00241163	-0.002375	-0.00197719	-0.00196379		86092	-0.00198395	-0.00205409	0.0015548	-0.00241366	-0.0019724	-0.00208422	-0.00241166	-0.00237495	-0.00197717	-0.00196371		86092	-0.00198397	-0.00205411	0.0015548	-0.00241367	-0.00197241	-0.00208424	-0.00241166	-0.00237495	-0.00197717	-0.00196373		86092	-0.00198398	-0.00205412	0.0015548	-0.00241367	-0.00197241	-0.00208425	-0.00241165	-0.002375	-0.00197718	-0.00196372
86093	-0.00198395	-0.0020541	0.00155481	-0.00241373	-0.00197236	-0.00208426	-0.00241163	-0.002375	-0.00197719	-0.00196379		86093	-0.00198395	-0.00205409	0.0015548	-0.00241366	-0.0019724	-0.00208422	-0.00241166	-0.00237495	-0.00197717	-0.00196371		86093	-0.00198397	-0.00205411	0.0015548	-0.00241367	-0.00197241	-0.00208424	-0.00241166	-0.00237495	-0.00197717	-0.00196373		86093	-0.00198398	-0.00205412	0.0015548	-0.00241367	-0.00197241	-0.00208425	-0.00241165	-0.002375	-0.00197718	-0.00196372
86094	-0.00198395	-0.0020541	0.00155481	-0.00241373	-0.00197236	-0.00208426	-0.00241163	-0.002375	-0.00197719	-0.00196379		86094	-0.00198395	-0.00205409	0.0015548	-0.00241366	-0.0019724	-0.00208422	-0.00241166	-0.00237495	-0.00197717	-0.00196371		86094	-0.00198397	-0.00205411	0.0015548	-0.00241367	-0.00197241	-0.00208424	-0.00241166	-0.00237495	-0.00197717	-0.00196373		86094	-0.00198398	-0.00205412	0.0015548	-0.00241367	-0.00197241	-0.00208425	-0.00241165	-0.002375	-0.00197718	-0.00196372
86095	-0.00198395	-0.0020541	0.00155481	-0.00241373	-0.00197236	-0.00208426	-0.00241163	-0.002375	-0.00197719	-0.00196379		86095	-0.00198395	-0.00205409	0.0015548	-0.00241366	-0.0019724	-0.00208422	-0.00241166	-0.00237495	-0.00197717	-0.00196371		86095	-0.00198397	-0.00205411	0.0015548	-0.00241367	-0.00197241	-0.00208424	-0.00241166	-0.00237495	-0.00197717	-0.00196373		86095	-0.00198398	-0.00205412	0.0015548	-0.00241367	-0.00197241	-0.00208425	-0.00241165	-0.002375	-0.00197718	-0.00196372
86096	-0.00198395	-0.0020541	0.00155481	-0.00241373	-0.00197236	-0.00208426	-0.00241163	-0.002375	-0.00197719	-0.00196379		86096	-0.00198395	-0.00205409	0.0015548	-0.00241366	-0.0019724	-0.00208422	-0.00241166	-0.00237495	-0.00197717	-0.00196371		86096	-0.00198397	-0.00205411	0.0015548	-0.00241367	-0.00197241	-0.00208424	-0.00241166	-0.00237495	-0.00197717	-0.00196373		86096	-0.00198398	-0.00205412	0.0015548	-0.00241367	-0.00197241	-0.00208425	-0.00241165	-0.002375	-0.00197718	-0.00196372
86097	-0.00198395	-0.0020541	0.00155481	-0.00241373	-0.00197236	-0.00208426	-0.00241163	-0.002375	-0.00197719	-0.00196379		86097	-0.00198395	-0.00205409	0.0015548	-0.00241366	-0.0019724	-0.00208422	-0.00241166	-0.00237495	-0.00197717	-0.00196371		86097	-0.00198397	-0.00205411	0.0015548	-0.00241367	-0.00197241	-0.00208424	-0.00241166	-0.00237495	-0.00197717	-0.00196373		86097	-0.00198398	-0.00205412	0.0015548	-0.00241367	-0.00197241	-0.00208425	-0.00241165	-0.002375	-0.00197718	-0.00196372
86098	-0.00198395	-0.0020541	0.00155481	-0.00241373	-0.00197236	-0.00208426	-0.00241163	-0.002375	-0.00197719	-0.00196379		86098	-0.00198395	-0.00205409	0.0015548	-0.00241366	-0.0019724	-0.00208422	-0.00241166	-0.00237495	-0.00197717	-0.00196371		86098	-0.00198397	-0.00205411	0.0015548	-0.00241367	-0.00197241	-0.00208424	-0.00241166	-0.00237495	-0.00197717	-0.00196373		86098	-0.00198398	-0.00205412	0.0015548	-0.00241367	-0.00197241	-0.00208425	-0.00241165	-0.002375	-0.00197718	-0.00196372
86099	-0.00198395	-0.0020541	0.00155481	-0.00241373	-0.00197236	-0.00208426	-0.00241163	-0.002375	-0.00197719	-0.00196379		86099	-0.00198395	-0.00205409	0.0015548	-0.00241366	-0.0019724	-0.00208422	-0.00241166	-0.00237495	-0.00197717	-0.00196371		86099	-0.00198397	-0.00205411	0.0015548	-0.00241367	-0.00197241	-0.00208424	-0.00241166	-0.00237495	-0.00197717	-0.00196373		86099	-0.00198398	-0.00205412	0.0015548	-0.00241367	-0.00197241	-0.00208425	-0.00241165	-0.002375	-0.00197718	-0.00196372
86100	-0.00198395	-0.0020541	0.00155481	-0.00241373	-0.00197236	-0.00208426	-0.00241163	-0.002375	-0.00197719	-0.00196379		86100	-0.00198395	-0.00205409	0.0015548	-0.00241366	-0.0019724	-0.00208422	-0.00241166	-0.00237495	-0.00197717	-0.00196371		86100	-0.00198397	-0.00205411	0.0015548	-0.00241367	-0.00197241	-0.00208424	-0.00241166	-0.00237495	-0.00197717	-0.00196373		86100	-0.00198398	-0.00205412	0.0015548	-0.00241367	-0.00197241	-0.00208425	-0.00241165	-0.002375	-0.00197718	-0.00196372
86101	-0.00198395	-0.0020541	0.00155481	-0.00241373	-0.00197236	-0.00208426	-0.00241163	-0.002375	-0.00197719	-0.00196379		86101	-0.00198395	-0.00205409	0.0015548	-0.00241366	-0.0019724	-0.00208422	-0.00241166	-0.00237495	-0.00197717	-0.00196371		86101	-0.00198397	-0.00205411	0.0015548	-0.00241367	-0.00197241	-0.00208424	-0.00241166	-0.00237495	-0.00197717	-0.00196373		86101	-0.00198398	-0.00205412	0.0015548	-0.00241367	-0.00197241	-0.00208425	-0.00241165	-0.002375	-0.00197718	-0.00196372
86102	-0.00198395	-0.0020541	0.00155481	-0.00241373	-0.00197236	-0.00208426	-0.00241163	-0.002375	-0.00197719	-0.00196379		86102	-0.00198395	-0.00205409	0.0015548	-0.00241366	-0.0019724	-0.00208422	-0.00241166	-0.00237495	-0.00197717	-0.00196371		86102	-0.00198397	-0.00205411	0.0015548	-0.00241367	-0.00197241	-0.00208424	-0.00241166	-0.00237495	-0.00197717	-0.00196373		86102	-0.00198398	-0.00205412	0.0015548	-0.00241367	-0.00197241	-0.00208425	-0.00241165	-0.002375	-0.00197718	-0.00196372
86103	-0.00198395	-0.0020541	0.00155481	-0.00241373	-0.00197236	-0.00208426	-0.00241163	-0.002375	-0.00197719	-0.00196379		86103	-0.00198395	-0.00205409	0.0015548	-0.00241366	-0.0019724	-0.00208422	-0.00241166	-0.00237495	-0.00197717	-0.00196371		86103	-0.00198397	-0.00205411	0.0015548	-0.00241367	-0.00197241	-0.00208424	-0.00241166	-0.00237495	-0.00197717	-0.00196373		86103	-0.00198398	-0.00205412	0.0015548	-0.00241367	-0.00197241	-0.00208425	-0.00241165	-0.002375	-0.00197718	-0.00196372
86104	-0.00198395	-0.0020541	0.00155481	-0.00241373	-0.00197236	-0.00208426	-0.00241163	-0.002375	-0.00197719	-0.00196379		86104	-0.00198395	-0.00205409	0.0015548	-0.00241366	-0.0019724	-0.00208422	-0.00241166	-0.00237495	-0.00197717	-0.00196371		86104	-0.00198397	-0.00205411	0.0015548	-0.00241367	-0.00197241	-0.00208424	-0.00241166	-0.00237495	-0.00197717	-0.00196373		86104	-0.00198398	-0.00205412	0.0015548	-0.00241367	-0.00197241	-0.00208425	-0.00241165	-0.002375	-0.00197718	-0.00196372
86105	-0.00198395	-0.0020541	0.00155481	-0.00241373	-0.00197236	-0.00208426	-0.00241163	-0.002375	-0.00197719	-0.00196379		86105	-0.00198395	-0.00205409	0.0015548	-0.00241366	-0.0019724	-0.00208422	-0.00241166	-0.00237495	-0.00197717	-0.00196371		86105	-0.00198397	-0.00205411	0.0015548	-0.00241367	-0.00197241	-0.00208424	-0.00241166	-0.00237495	-0.00197717	-0.00196373		86105	-0.00198398	-0.00205412	0.0015548	-0.00241367	-0.00197241	-0.00208425	-0.00241165	-0.002375	-0.00197718	-0.00196372
86106	-0.00198395	-0.0020541	0.00155481	-0.00241373	-0.00197236	-0.00208426	-0.00241163	-0.002375	-0.00197719	-0.00196379		86106	-0.00198395	-0.00205409	0.0015548	-0.00241366	-0.0019724	-0.00208422	-0.00241166	-0.00237495	-0.00197717	-0.00196371		86106	-0.00198397	-0.00205411	0.0015548	-0.00241367	-0.00197241	-0.00208424	-0.00241166	-0.00237495	-0.00197717	-0.00196373		86106	-0.00198398	-0.00205412	0.0015548	-0.00241367	-0.00197241	-0.00208425	-0.00241165	-0.002375	-0.00197718	-0.00196372
86107	-0.00198395	-0.0020541	0.00155481	-0.00241373	-0.00197236	-0.00208426	-0.00241163	-0.002375	-0.00197719	-0.00196379		86107	-0.00198395	-0.00205409	0.0015548	-0.00241366	-0.0019724	-0.00208422	-0.00241166	-0.00237495	-0.00197717	-0.00196371		86107	-0.00198397	-0.00205411	0.0015548	-0.00241367	-0.00197241	-0.00208424	-0.00241166	-0.00237495	-0.00197717	-0.00196373		86107	-0.00198398	-0.00205412	0.0015548	-0.00241367	-0.00197241	-0.00208425	-0.00241165	-0.002375	-0.00197718	-0.00196372
86108	-0.00198395	-0.0020541	0.00155481	-0.00241373	-0.00197236	-0.00208426	-0.00241163	-0.002375	-0.00197719	-0.00196379		86108	-0.00198395	-0.00205409	0.0015548	-0.00241366	-0.0019724	-0.00208422	-0.00241166	-0.00237495	-0.00197717	-0.00196371		86108	-0.00198397	-0.00205411	0.0015548	-0.00241367	-0.00197241	-0.00208424	-0.00241166	-0.00237495	-0.00197717	-0.00196373		86108	-0.00198398	-0.00205412	0.0015548	-0.00241367	-0.00197241	-0.00208425	-0.00241165	-0.002375	-0.00197718	-0.00196372
86109	-0.00198395	-0.0020541	0.00155481	-0.00241373	-0.00197236	-0.00208426	-0.00241163	-0.002375	-0.00197719	-0.00196379		86109	-0.00198395	-0.00205409	0.0015548	-0.00241366	-0.0019724	-0.00208422	-0.00241166	-0.00237495	-0.00197717	-0.00196371		86109	-0.00198397	-0.00205411	0.0015548	-0.00241367	-0.00197241	-0.00208424	-0.00241166	-0.00237495	-0.00197717	-0.00196373		86109	-0.00198398	-0.00205412	0.0015548	-0.00241367	-0.00197241	-0.00208425	-0.00241165	-0.002375	-0.00197718	-0.00196372
86110	-0.00198395	-0.0020541	0.00155481	-0.00241373	-0.00197236	-0.00208426	-0.00241163	-0.002375	-0.00197719	-0.00196379		86110	-0.00198395	-0.00205409	0.0015548	-0.00241366	-0.0019724	-0.00208422	-0.00241166	-0.00237495	-0.00197717	-0.00196371		86110	-0.00198397	-0.00205411	0.0015548	-0.00241367	-0.00197241	-0.00208424	-0.00241166	-0.00237495	-0.00197717	-0.00196373		86110	-0.00198398	-0.00205412	0.0015548	-0.00241367	-0.00197241	-0.00208425	-0.00241165	-0.002375	-0.00197718	-0.00196372
86111	-0.00198395	-0.0020541	0.00155481	-0.00241373	-0.00197236	-0.00208426	-0.00241163	-0.002375	-0.00197719	-0.00196379		86111	-0.00198395	-0.00205409	0.0015548	-0.00241366	-0.0019724	-0.00208422	-0.00241166	-0.00237495	-0.00197717	-0.00196371		86111	-0.00198397	-0.00205411	0.0015548	-0.00241367	-0.00197241	-0.00208424	-0.00241166	-0.00237495	-0.00197717	-0.00196373		86111	-0.00198398	-0.00205412	0.0015548	-0.00241367	-0.00197241	-0.00208425	-0.00241165	-0.002375	-0.00197718	-0.00196372
86112	-0.00198395	-0.0020541	0.00155481	-0.00241373	-0.00197236	-0.00208426	-0.00241163	-0.002375	-0.00197719	-0.00196379		86112	-0.00198395	-0.00205409	0.0015548	-0.00241366	-0.0019724	-0.00208422	-0.00241166	-0.00237495	-0.00197717	-0.00196371		86112	-0.00198397	-0.00205411	0.0015548	-0.00241367	-0.00197241	-0.00208424	-0.00241166	-0.00237495	-0.00197717	-0.00196373		86112	-0.00198398	-0.00205412	0.0015548	-0.00241367	-0.00197241	-0.00208425	-0.00241165	-0.002375	-0.00197718	-0.00196372
86113	-0.00198395	-0.0020541	0.00155481	-0.00241373	-0.00197236	-0.00208426	-0.00241163	-0.002375	-0.00197719	-0.00196379		86113	-0.00198395	-0.00205409	0.0015548	-0.00241366	-0.0019724	-0.00208422	-0.00241166	-0.00237495	-0.00197717	-0.00196371		86113	-0.00198397	-0.00205411	0.0015548	-0.00241367	-0.00197241	-0.00208424	-0.00241166	-0.00237495	-0.00197717	-0.00196373		86113	-0.00198398	-0.00205412	0.0015548	-0.00241367	-0.00197241	-0.00208425	-0.00241165	-0.002375	-0.00197718	-0.00196372
86114	-0.00198395	-0.0020541	0.00155481	-0.00241373	-0.00197236	-0.00208426	-0.00241163	-0.002375	-0.00197719	-0.00196379		86114	-0.00198395	-0.00205409	0.0015548	-0.00241366	-0.0019724	-0.00208422	-0.00241166	-0.00237495	-0.00197717	-0.00196371		86114	-0.00198397	-0.00205411	0.0015548	-0.00241367	-0.00197241	-0.00208424	-0.00241166	-0.00237495	-0.00197717	-0.00196373		86114	-0.00198398	-0.00205412	0.0015548	-0.00241367	-0.00197241	-0.00208425	-0.00241165	-0.002375	-0.00197718	-0.00196372
86115	-0.00198395	-0.0020541	0.00155481	-0.00241373	-0.00197236	-0.00208426	-0.00241163	-0.002375	-0.00197719	-0.00196379		86115	-0.00198395	-0.00205409	0.0015548	-0.00241366	-0.0019724	-0.00208422	-0.00241166	-0.00237495	-0.00197717	-0.00196371		86115	-0.00198397	-0.00205411	0.0015548	-0.00241367	-0.00197241	-0.00208424	-0.00241166	-0.00237495	-0.00197717	-0.00196373		86115	-0.00198398	-0.00205412	0.0015548	-0.00241367	-0.00197241	-0.00208425	-0.00241165	-0.002375	-0.00197718	-0.00196372
86116	-0.00198395	-0.0020541	0.00155481	-0.00241373	-0.00197236	-0.00208426	-0.00241163	-0.002375	-0.00197719	-0.00196379		86116	-0.00198395	-0.00205409	0.0015548	-0.00241366	-0.0019724	-0.00208422	-0.00241166	-0.00237495	-0.00197717	-0.00196371		86116	-0.00198397	-0.00205411	0.0015548	-0.00241367	-0.00197241	-0.00208424	-0.00241166	-0.00237495	-0.00197717	-0.00196373		86116	-0.00198398	-0.00205412	0.0015548	-0.00241367	-0.00197241	-0.00208425	-0.00241165	-0.002375	-0.00197718	-0.00196372
86117	-0.00198395	-0.0020541	0.00155481	-0.00241373	-0.00197236	-0.00208426	-0.00241163	-0.002375	-0.00197719	-0.00196379		86117	-0.00198395	-0.00205409	0.0015548	-0.00241366	-0.0019724	-0.00208422	-0.00241166	-0.00237495	-0.00197717	-0.00196371		86117	-0.00198397	-0.00205411	0.0015548	-0.00241367	-0.00197241	-0.00208424	-0.00241166	-0.00237495	-0.00197717	-0.00196373		86117	-0.00198398	-0.00205412	0.0015548	-0.00241367	-0.00197241	-0.00208425	-0.00241165	-0.002375	-0.00197718	-0.00196372
86118	-0.00198395	-0.0020541	0.00155481	-0.00241373	-0.00197236	-0.00208426	-0.00241163	-0.002375	-0.00197719	-0.00196379		86118	-0.00198395	-0.00205409	0.0015548	-0.00241366	-0.0019724	-0.00208422	-0.00241166	-0.00237495	-0.00197717	-0.00196371		86118	-0.00198397	-0.00205411	0.0015548	-0.00241367	-0.00197241	-0.00208424	-0.00241166	-0.00237495	-0.00197717	-0.00196373		86118	-0.00198398	-0.00205412	0.0015548	-0.00241367	-0.00197241	-0.00208425	-0.00241165	-0.002375	-0.00197718	-0.00196372
86119	-0.00198395	-0.0020541	0.00155481	-0.00241373	-0.00197236	-0.00208426	-0.00241163	-0.002375	-0.00197719	-0.00196379		86119	-0.00198395	-0.00205409	0.0015548	-0.00241366	-0.0019724	-0.00208422	-0.00241166	-0.00237495	-0.00197717	-0.00196371		86119	-0.00198397	-0.00205411	0.0015548	-0.00241367	-0.00197241	-0.00208424	-0.00241166	-0.00237495	-0.00197717	-0.00196373		86119	-0.00198398	-0.00205412	0.0015548	-0.00241367	-0.00197241	-0.00208425	-0.00241165	-0.002375	-0.00197718	-0.00196372
86120	-0.00198395	-0.0020541	0.00155481	-0.00241373	-0.00197236	-0.00208426	-0.00241163	-0.002375	-0.00197719	-0.00196379		86120	-0.00198395	-0.00205409	0.0015548	-0.00241366	-0.0019724	-0.00208422	-0.00241166	-0.00237495	-0.00197717	-0.00196371		86120	-0.00198397	-0.00205411	0.0015548	-0.00241367	-0.00197241	-0.00208424	-0.00241166	-0.00237495	-0.00197717	-0.00196373		86120	-0.00198398	-0.00205412	0.0015548	-0.00241367	-0.00197241	-0.00208425	-0.00241165	-0.002375	-0.00197718	-0.00196372
86121	-0.00198395	-0.0020541	0.00155481	-0.00241373	-0.00197236	-0.00208426	-0.00241163	-0.002375	-0.00197719	-0.00196379		86121	-0.00198395	-0.00205409	0.0015548	-0.00241366	-0.0019724	-0.00208422	-0.00241166	-0.00237495	-0.00197717	-0.00196371		86121	-0.00198397	-0.00205411	0.0015548	-0.00241367	-0.00197241	-0.00208424	-0.00241166	-0.00237495	-0.00197717	-0.00196373		86121	-0.00198398	-0.00205412	0.0015548	-0.00241367	-0.00197241	-0.00208425	-0.00241165	-0.002375	-0.00197718	-0.00196372
86122	-0.00198395	-0.0020541	0.00155481	-0.00241373	-0.00197236	-0.00208426	-0.00241163	-0.002375	-0.00197719	-0.00196379		86122	-0.00198395	-0.00205409	0.0015548	-0.00241366	-0.0019724	-0.00208422	-0.00241166	-0.00237495	-0.00197717	-0.00196371		86122	-0.00198397	-0.00205411	0.0015548	-0.00241367	-0.00197241	-0.00208424	-0.00241166	-0.00237495	-0.00197717	-0.00196373		86122	-0.00198398	-0.00205412	0.0015548	-0.00241367	-0.00197241	-0.00208425	-0.00241165	-0.002375	-0.00197718	-0.00196372
86123	-0.00198395	-0.0020541	0.00155481	-0.00241373	-0.00197236	-0.00208426	-0.00241163	-0.002375	-0.00197719	-0.00196379		86123	-0.00198395	-0.00205409	0.0015548	-0.00241366	-0.0019724	-0.00208422	-0.00241166	-0.00237495	-0.00197717	-0.00196371		86123	-0.00198397	-0.00205411	0.0015548	-0.00241367	-0.00197241	-0.00208424	-0.00241166	-0.00237495	-0.00197717	-0.00196373		86123	-0.00198398	-0.00205412	0.0015548	-0.00241367	-0.00197241	-0.00208425	-0.00241165	-0.002375	-0.00197718	-0.00196372
86124	-0.00198395	-0.0020541	0.00155481	-0.00241373	-0.00197236	-0.00208426	-0.00241163	-0.002375	-0.00197719	-0.00196379		86124	-0.00198395	-0.00205409	0.0015548	-0.00241366	-0.0019724	-0.00208422	-0.00241166	-0.00237495	-0.00197717	-0.00196371		86124	-0.00198397	-0.00205411	0.0015548	-0.00241367	-0.00197241	-0.00208424	-0.00241166	-0.00237495	-0.00197717	-0.00196373		86124	-0.00198398	-0.00205412	0.0015548	-0.00241367	-0.00197241	-0.00208425	-0.00241165	-0.002375	-0.00197718	-0.00196372
86125	-0.00198395	-0.0020541	0.00155481	-0.00241373	-0.00197236	-0.00208426	-0.00241163	-0.002375	-0.00197719	-0.00196379		86125	-0.00198395	-0.00205409	0.0015548	-0.00241366	-0.0019724	-0.00208422	-0.00241166	-0.00237495	-0.00197717	-0.00196371		86125	-0.00198397	-0.00205411	0.0015548	-0.00241367	-0.00197241	-0.00208424	-0.00241166	-0.00237495	-0.00197717	-0.00196373		86125	-0.00198398	-0.00205412	0.0015548	-0.00241367	-0.00197241	-0.00208425	-0.00241165	-0.002375	-0.00197718	-0.00196372
86126	-0.00198395	-0.0020541	0.00155481	-0.00241373	-0.00197236	-0.00208426	-0.00241163	-0.002375	-0.00197719	-0.00196379		86126	-0.00198395	-0.00205409	0.0015548	-0.00241366	-0.0019724	-0.00208422	-0.00241166	-0.00237495	-0.00197717	-0.00196371		86126	-0.00198397	-0.00205411	0.0015548	-0.00241367	-0.00197241	-0.00208424	-0.00241166	-0.00237495	-0.00197717	-0.00196373		86126	-0.00198398	-0.00205412	0.0015548	-0.00241367	-0.00197241	-0.00208425	-0.00241165	-0.002375	-0.00197718	-0.00196372
86127	-0.00198395	-0.0020541	0.00155481	-0.00241373	-0.00197236	-0.00208426	-0.00241163	-0.002375	-0.00197719	-0.00196379		86127	-0.00198395	-0.00205409	0.0015548	-0.00241366	-0.0019724	-0.00208422	-0.00241166	-0.00237495	-0.00197717	-0.00196371		86127	-0.00198397	-0.00205411	0.0015548	-0.00241367	-0.00197241	-0.00208424	-0.00241166	-0.00237495	-0.00197717	-0.00196373		86127	-0.00198398	-0.00205412	0.0015548	-0.00241367	-0.00197241	-0.00208425	-0.00241165	-0.002375	-0.00197718	-0.00196372
86128	-0.00198395	-0.0020541	0.00155481	-0.00241373	-0.00197236	-0.00208426	-0.00241163	-0.002375	-0.00197719	-0.00196379		86128	-0.00198395	-0.00205409	0.0015548	-0.00241366	-0.0019724	-0.00208422	-0.00241166	-0.00237495	-0.00197717	-0.00196371		86128	-0.00198397	-0.00205411	0.0015548	-0.00241367	-0.00197241	-0.00208424	-0.00241166	-0.00237495	-0.00197717	-0.00196373		86128	-0.00198398	-0.00205412	0.0015548	-0.00241367	-0.00197241	-0.00208425	-0.00241165	-0.002375	-0.00197718	-0.00196372
86129	-0.00198395	-0.0020541	0.00155481	-0.00241373	-0.00197236	-0.00208426	-0.00241163	-0.002375	-0.00197719	-0.00196379		86129	-0.00198395	-0.00205409	0.0015548	-0.00241366	-0.0019724	-0.00208422	-0.00241166	-0.00237495	-0.00197717	-0.00196371		86129	-0.00198397	-0.00205411	0.0015548	-0.00241367	-0.00197241	-0.00208424	-0.00241166	-0.00237495	-0.00197717	-0.00196373		86129	-0.00198398	-0.00205412	0.0015548	-0.00241367	-0.00197241	-0.00208425	-0.00241165	-0.002375	-0.00197718	-0.00196372
86130	-0.00198395	-0.0020541	0.00155481	-0.00241373	-0.00197236	-0.00208426	-0.00241163	-0.002375	-0.00197719	-0.00196379		86130	-0.00198395	-0.00205409	0.0015548	-0.00241366	-0.0019724	-0.00208422	-0.00241166	-0.00237495	-0.00197717	-0.00196371		86130	-0.00198397	-0.00205411	0.0015548	-0.00241367	-0.00197241	-0.00208424	-0.00241166	-0.00237495	-0.00197717	-0.00196373		86130	-0.00198398	-0.00205412	0.0015548	-0.00241367	-0.00197241	-0.00208425	-0.00241165	-0.002375	-0.00197718	-0.00196372
86131	-0.00198395	-0.0020541	0.00155481	-0.00241373	-0.00197236	-0.00208426	-0.00241163	-0.002375	-0.00197719	-0.00196379		86131	-0.00198395	-0.00205409	0.0015548	-0.00241366	-0.0019724	-0.00208422	-0.00241166	-0.00237495	-0.00197717	-0.00196371		86131	-0.00198397	-0.00205411	0.0015548	-0.00241367	-0.00197241	-0.00208424	-0.00241166	-0.00237495	-0.00197717	-0.00196373		86131	-0.00198398	-0.00205412	0.0015548	-0.00241367	-0.00197241	-0.00208425	-0.00241165	-0.002375	-0.00197718	-0.00196372
86132	-0.00198395	-0.0020541	0.00155481	-0.00241373	-0.00197236	-0.00208426	-0.00241163	-0.002375	-0.00197719	-0.00196379		86132	-0.00198395	-0.00205409	0.0015548	-0.00241366	-0.0019724	-0.00208422	-0.00241166	-0.00237495	-0.00197717	-0.00196371		86132	-0.00198397	-0.00205411	0.0015548	-0.00241367	-0.00197241	-0.00208424	-0.00241166	-0.00237495	-0.00197717	-0.00196373		86132	-0.00198398	-0.00205412	0.0015548	-0.00241367	-0.00197241	-0.00208425	-0.00241165	-0.002375	-0.00197718	-0.00196372
86133	-0.00198395	-0.0020541	0.00155481	-0.00241373	-0.00197236	-0.00208426	-0.00241163	-0.002375	-0.00197719	-0.00196379		86133	-0.00198395	-0.00205409	0.0015548	-0.00241366	-0.0019724	-0.00208422	-0.00241166	-0.00237495	-0.00197717	-0.00196371		86133	-0.00198397	-0.00205411	0.0015548	-0.00241367	-0.00197241	-0.00208424	-0.00241166	-0.00237495	-0.00197717	-0.00196373		86133	-0.00198398	-0.00205412	0.0015548	-0.00241367	-0.00197241	-0.00208425	-0.00241165	-0.002375	-0.00197718	-0.00196372
86134	-0.00198395	-0.0020541	0.00155481	-0.00241373	-0.00197236	-0.00208426	-0.00241163	-0.002375	-0.00197719	-0.00196379		86134	-0.00198395	-0.00205409	0.0015548	-0.00241366	-0.0019724	-0.00208422	-0.00241166	-0.00237495	-0.00197717	-0.00196371		86134	-0.00198397	-0.00205411	0.0015548	-0.00241367	-0.00197241	-0.00208424	-0.00241166	-0.00237495	-0.00197717	-0.00196373		86134	-0.00198398	-0.00205412	0.0015548	-0.00241367	-0.00197241	-0.00208425	-0.00241165	-0.002375	-0.00197718	-0.00196372
86135	-0.00198395	-0.0020541	0.00155481	-0.00241373	-0.00197236	-0.00208426	-0.00241163	-0.002375	-0.00197719	-0.00196379		86135	-0.00198395	-0.00205409	0.0015548	-0.00241366	-0.0019724	-0.00208422	-0.00241166	-0.00237495	-0.00197717	-0.00196371		86135	-0.00198397	-0.00205411	0.0015548	-0.00241367	-0.00197241	-0.00208424	-0.00241166	-0.00237495	-0.00197717	-0.00196373		86135	-0.00198398	-0.00205412	0.0015548	-0.00241367	-0.00197241	-0.00208425	-0.00241165	-0.002375	-0.00197718	-0.00196372
86136	-0.00198395	-0.0020541	0.00155481	-0.00241373	-0.00197236	-0.00208426	-0.00241163	-0.002375	-0.00197719	-0.00196379		86136	-0.00198395	-0.00205409	0.0015548	-0.00241366	-0.0019724	-0.00208422	-0.00241166	-0.00237495	-0.00197717	-0.00196371		86136	-0.00198397	-0.00205411	0.0015548	-0.00241367	-0.00197241	-0.00208424	-0.00241166	-0.00237495	-0.00197717	-0.00196373		86136	-0.00198398	-0.00205412	0.0015548	-0.00241367	-0.00197241	-0.00208425	-0.00241165	-0.002375	-0.00197718	-0.00196372
86137	-0.00198395	-0.0020541	0.00155481	-0.00241373	-0.00197236	-0.00208426	-0.00241163	-0.002375	-0.00197719	-0.00196379		86137	-0.00198395	-0.00205409	0.0015548	-0.00241366	-0.0019724	-0.00208422	-0.00241166	-0.00237495	-0.00197717	-0.00196371		86137	-0.00198397	-0.00205411	0.0015548	-0.00241367	-0.00197241	-0.00208424	-0.00241166	-0.00237495	-0.00197717	-0.00196373		86137	-0.00198398	-0.00205412	0.0015548	-0.00241367	-0.00197241	-0.00208425	-0.00241165	-0.002375	-0.00197718	-0.00196372
86138	-0.00198395	-0.0020541	0.00155481	-0.00241373	-0.00197236	-0.00208426	-0.00241163	-0.002375	-0.00197719	-0.00196379		86138	-0.00198395	-0.00205409	0.0015548	-0.00241366	-0.0019724	-0.00208422	-0.00241166	-0.00237495	-0.00197717	-0.00196371		86138	-0.00198397	-0.00205411	0.0015548	-0.00241367	-0.00197241	-0.00208424	-0.00241166	-0.00237495	-0.00197717	-0.00196373		86138	-0.00198398	-0.00205412	0.0015548	-0.00241367	-0.00197241	-0.00208425	-0.00241165	-0.002375	-0.00197718	-0.00196372
86139	-0.00198395	-0.0020541	0.00155481	-0.00241373	-0.00197236	-0.00208426	-0.00241163	-0.002375	-0.00197719	-0.00196379		86139	-0.00198395	-0.00205409	0.0015548	-0.00241366	-0.0019724	-0.00208422	-0.00241166	-0.00237495	-0.00197717	-0.00196371		86139	-0.00198397	-0.00205411	0.0015548	-0.00241367	-0.00197241	-0.00208424	-0.00241166	-0.00237495	-0.00197717	-0.00196373		86139	-0.00198398	-0.00205412	0.0015548	-0.00241367	-0.00197241	-0.00208425	-0.00241165	-0.002375	-0.00197718	-0.00196372
86140	-0.00198395	-0.0020541	0.00155481	-0.00241373	-0.00197236	-0.00208426	-0.00241163	-0.002375	-0.00197719	-0.00196379		86140	-0.00198395	-0.00205409	0.0015548	-0.00241366	-0.0019724	-0.00208422	-0.00241166	-0.00237495	-0.00197717	-0.00196371		86140	-0.00198397	-0.00205411	0.0015548	-0.00241367	-0.00197241	-0.00208424	-0.00241166	-0.00237495	-0.00197717	-0.00196373		86140	-0.00198398	-0.00205412	0.0015548	-0.00241367	-0.00197241	-0.00208425	-0.00241165	-0.002375	-0.00197718	-0.00196372
86141	-0.00198395	-0.0020541	0.00155481	-0.00241373	-0.00197236	-0.00208426	-0.00241163	-0.002375	-0.00197719	-0.00196379		86141	-0.00198395	-0.00205409	0.0015548	-0.00241366	-0.0019724	-0.00208422	-0.00241166	-0.00237495	-0.00197717	-0.00196371		86141	-0.00198397	-0.00205411	0.0015548	-0.00241367	-0.00197241	-0.00208424	-0.00241166	-0.00237495	-0.00197717	-0.00196373		86141	-0.00198398	-0.00205412	0.0015548	-0.00241367	-0.00197241	-0.00208425	-0.00241165	-0.002375	-0.00197718	-0.00196372
86142	-0.00198395	-0.0020541	0.00155481	-0.00241373	-0.00197236	-0.00208426	-0.00241163	-0.002375	-0.00197719	-0.00196379		86142	-0.00198395	-0.00205409	0.0015548	-0.00241366	-0.0019724	-0.00208422	-0.00241166	-0.00237495	-0.00197717	-0.00196371		86142	-0.00198397	-0.00205411	0.0015548	-0.00241367	-0.00197241	-0.00208424	-0.00241166	-0.00237495	-0.00197717	-0.00196373		86142	-0.00198398	-0.00205412	0.0015548	-0.00241367	-0.00197241	-0.00208425	-0.00241165	-0.002375	-0.00197718	-0.00196372
86143	-0.00198395	-0.0020541	0.00155481	-0.00241373	-0.00197236	-0.00208426	-0.00241163	-0.002375	-0.00197719	-0.00196379		86143	-0.00198395	-0.00205409	0.0015548	-0.00241366	-0.0019724	-0.00208422	-0.00241166	-0.00237495	-0.00197717	-0.00196371		86143	-0.00198397	-0.00205411	0.0015548	-0.00241367	-0.00197241	-0.00208424	-0.00241166	-0.00237495	-0.00197717	-0.00196373		86143	-0.00198398	-0.00205412	0.0015548	-0.00241367	-0.00197241	-0.00208425	-0.00241165	-0.002375	-0.00197718	-0.00196372
86144	-0.00198395	-0.0020541	0.00155481	-0.00241373	-0.00197236	-0.00208426	-0.00241163	-0.002375	-0.00197719	-0.00196379		86144	-0.00198395	-0.00205409	0.0015548	-0.00241366	-0.0019724	-0.00208422	-0.00241166	-0.00237495	-0.00197717	-0.00196371		86144	-0.00198397	-0.00205411	0.0015548	-0.00241367	-0.00197241	-0.00208424	-0.00241166	-0.00237495	-0.00197717	-0.00196373		86144	-0.00198398	-0.00205412	0.0015548	-0.00241367	-0.00197241	-0.00208425	-0.00241165	-0.002375	-0.00197718	-0.00196372
86145	-0.00198395	-0.0020541	0.00155481	-0.00241373	-0.00197236	-0.00208426	-0.00241163	-0.002375	-0.00197719	-0.00196379		86145	-0.00198395	-0.00205409	0.0015548	-0.00241366	-0.0019724	-0.00208422	-0.00241166	-0.00237495	-0.00197717	-0.00196371		86145	-0.00198397	-0.00205411	0.0015548	-0.00241367	-0.00197241	-0.00208424	-0.00241166	-0.00237495	-0.00197717	-0.00196373		86145	-0.00198398	-0.00205412	0.0015548	-0.00241367	-0.00197241	-0.00208425	-0.00241165	-0.002375	-0.00197718	-0.00196372
86146	-0.00198395	-0.0020541	0.00155481	-0.00241373	-0.00197236	-0.00208426	-0.00241163	-0.002375	-0.00197719	-0.00196379		86146	-0.00198395	-0.00205409	0.0015548	-0.00241366	-0.0019724	-0.00208422	-0.00241166	-0.00237495	-0.00197717	-0.00196371		86146	-0.00198397	-0.00205411	0.0015548	-0.00241367	-0.00197241	-0.00208424	-0.00241166	-0.00237495	-0.00197717	-0.00196373		86146	-0.00198398	-0.00205412	0.0015548	-0.00241367	-0.00197241	-0.00208425	-0.00241165	-0.002375	-0.00197718	-0.00196372
86147	-0.00198395	-0.0020541	0.00155481	-0.00241373	-0.00197236	-0.00208426	-0.00241163	-0.002375	-0.00197719	-0.00196379		86147	-0.00198395	-0.00205409	0.0015548	-0.00241366	-0.0019724	-0.00208422	-0.00241166	-0.00237495	-0.00197717	-0.00196371		86147	-0.00198397	-0.00205411	0.0015548	-0.00241367	-0.00197241	-0.00208424	-0.00241166	-0.00237495	-0.00197717	-0.00196373		86147	-0.00198398	-0.00205412	0.0015548	-0.00241367	-0.00197241	-0.00208425	-0.00241165	-0.002375	-0.00197718	-0.00196372
86148	-0.00198395	-0.0020541	0.00155481	-0.00241373	-0.00197236	-0.00208426	-0.00241163	-0.002375	-0.00197719	-0.00196379		86148	-0.00198395	-0.00205409	0.0015548	-0.00241366	-0.0019724	-0.00208422	-0.00241166	-0.00237495	-0.00197717	-0.00196371		86148	-0.00198397	-0.00205411	0.0015548	-0.00241367	-0.00197241	-0.00208424	-0.00241166	-0.00237495	-0.00197717	-0.00196373		86148	-0.00198398	-0.00205412	0.0015548	-0.00241367	-0.00197241	-0.00208425	-0.00241165	-0.002375	-0.00197718	-0.00196372
86149	-0.00198395	-0.0020541	0.00155481	-0.00241373	-0.00197236	-0.00208426	-0.00241163	-0.002375	-0.00197719	-0.00196379		86149	-0.00198395	-0.00205409	0.0015548	-0.00241366	-0.0019724	-0.00208422	-0.00241166	-0.00237495	-0.00197717	-0.00196371		86149	-0.00198397	-0.00205411	0.0015548	-0.00241367	-0.00197241	-0.00208424	-0.00241166	-0.00237495	-0.00197717	-0.00196373		86149	-0.00198398	-0.00205412	0.0015548	-0.00241367	-0.00197241	-0.00208425	-0.00241165	-0.002375	-0.00197718	-0.00196372
86150	-0.00198395	-0.0020541	0.00155481	-0.00241373	-0.00197236	-0.00208426	-0.00241163	-0.002375	-0.00197719	-0.00196379		86150	-0.00198395	-0.00205409	0.0015548	-0.00241366	-0.0019724	-0.00208422	-0.00241166	-0.00237495	-0.00197717	-0.00196371		86150	-0.00198397	-0.00205411	0.0015548	-0.00241367	-0.00197241	-0.00208424	-0.00241166	-0.00237495	-0.00197717	-0.00196373		86150	-0.00198398	-0.00205412	0.0015548	-0.00241367	-0.00197241	-0.00208425	-0.00241165	-0.002375	-0.00197718	-0.00196372
86151	-0.00198395	-0.0020541	0.00155481	-0.00241373	-0.00197236	-0.00208426	-0.00241163	-0.002375	-0.00197719	-0.00196379		86151	-0.00198395	-0.00205409	0.0015548	-0.00241366	-0.0019724	-0.00208422	-0.00241166	-0.00237495	-0.00197717	-0.00196371		86151	-0.00198397	-0.00205411	0.0015548	-0.00241367	-0.00197241	-0.00208424	-0.00241166	-0.00237495	-0.00197717	-0.00196373		86151	-0.00198398	-0.00205412	0.0015548	-0.00241367	-0.00197241	-0.00208425	-0.00241165	-0.002375	-0.00197718	-0.00196372
86152	-0.00198395	-0.0020541	0.00155481	-0.00241373	-0.00197236	-0.00208426	-0.00241163	-0.002375	-0.00197719	-0.00196379		86152	-0.00198395	-0.00205409	0.0015548	-0.00241366	-0.0019724	-0.00208422	-0.00241166	-0.00237495	-0.00197717	-0.00196371		86152	-0.00198397	-0.00205411	0.0015548	-0.00241367	-0.00197241	-0.00208424	-0.00241166	-0.00237495	-0.00197717	-0.00196373		86152	-0.00198398	-0.00205412	0.0015548	-0.00241367	-0.00197241	-0.00208425	-0.00241165	-0.002375	-0.00197718	-0.00196372
86153	-0.00198395	-0.0020541	0.00155481	-0.00241373	-0.00197236	-0.00208426	-0.00241163	-0.002375	-0.00197719	-0.00196379		86153	-0.00198395	-0.00205409	0.0015548	-0.00241366	-0.0019724	-0.00208422	-0.00241166	-0.00237495	-0.00197717	-0.00196371		86153	-0.00198397	-0.00205411	0.0015548	-0.00241367	-0.00197241	-0.00208424	-0.00241166	-0.00237495	-0.00197717	-0.00196373		86153	-0.00198398	-0.00205412	0.0015548	-0.00241367	-0.00197241	-0.00208425	-0.00241165	-0.002375	-0.00197718	-0.00196372
86154	-0.00198395	-0.0020541	0.00155481	-0.00241373	-0.00197236	-0.00208426	-0.00241163	-0.002375	-0.00197719	-0.00196379		86154	-0.00198395	-0.00205409	0.0015548	-0.00241366	-0.0019724	-0.00208422	-0.00241166	-0.00237495	-0.00197717	-0.00196371		86154	-0.00198397	-0.00205411	0.0015548	-0.00241367	-0.00197241	-0.00208424	-0.00241166	-0.00237495	-0.00197717	-0.00196373		86154	-0.00198398	-0.00205412	0.0015548	-0.00241367	-0.00197241	-0.00208425	-0.00241165	-0.002375	-0.00197718	-0.00196372
86155	-0.00198395	-0.0020541	0.00155481	-0.00241373	-0.00197236	-0.00208426	-0.00241163	-0.002375	-0.00197719	-0.00196379		86155	-0.00198395	-0.00205409	0.0015548	-0.00241366	-0.0019724	-0.00208422	-0.00241166	-0.00237495	-0.00197717	-0.00196371		86155	-0.00198397	-0.00205411	0.0015548	-0.00241367	-0.00197241	-0.00208424	-0.00241166	-0.00237495	-0.00197717	-0.00196373		86155	-0.00198398	-0.00205412	0.0015548	-0.00241367	-0.00197241	-0.00208425	-0.00241165	-0.002375	-0.00197718	-0.00196372
86156	-0.00198395	-0.0020541	0.00155481	-0.00241373	-0.00197236	-0.00208426	-0.00241163	-0.002375	-0.00197719	-0.00196379		86156	-0.00198395	-0.00205409	0.0015548	-0.00241366	-0.0019724	-0.00208422	-0.00241166	-0.00237495	-0.00197717	-0.00196371		86156	-0.00198397	-0.00205411	0.0015548	-0.00241367	-0.00197241	-0.00208424	-0.00241166	-0.00237495	-0.00197717	-0.00196373		86156	-0.00198398	-0.00205412	0.0015548	-0.00241367	-0.00197241	-0.00208425	-0.00241165	-0.002375	-0.00197718	-0.00196372
86157	-0.00198395	-0.0020541	0.00155481	-0.00241373	-0.00197236	-0.00208426	-0.00241163	-0.002375	-0.00197719	-0.00196379		86157	-0.00198395	-0.00205409	0.0015548	-0.00241366	-0.0019724	-0.00208422	-0.00241166	-0.00237495	-0.00197717	-0.00196371		86157	-0.00198397	-0.00205411	0.0015548	-0.00241367	-0.00197241	-0.00208424	-0.00241166	-0.00237495	-0.00197717	-0.00196373		86157	-0.00198398	-0.00205412	0.0015548	-0.00241367	-0.00197241	-0.00208425	-0.00241165	-0.002375	-0.00197718	-0.00196372
86158	-0.00198395	-0.0020541	0.00155481	-0.00241373	-0.00197236	-0.00208426	-0.00241163	-0.002375	-0.00197719	-0.00196379		86158	-0.00198395	-0.00205409	0.0015548	-0.00241366	-0.0019724	-0.00208422	-0.00241166	-0.00237495	-0.00197717	-0.00196371		86158	-0.00198397	-0.00205411	0.0015548	-0.00241367	-0.00197241	-0.00208424	-0.00241166	-0.00237495	-0.00197717	-0.00196373		86158	-0.00198398	-0.00205412	0.0015548	-0.00241367	-0.00197241	-0.00208425	-0.00241165	-0.002375	-0.00197718	-0.00196372
86159	-0.00198395	-0.0020541	0.00155481	-0.00241373	-0.00197236	-0.00208426	-0.00241163	-0.002375	-0.00197719	-0.00196379		86159	-0.00198395	-0.00205409	0.0015548	-0.00241366	-0.0019724	-0.00208422	-0.00241166	-0.00237495	-0.00197717	-0.00196371		86159	-0.00198397	-0.00205411	0.0015548	-0.00241367	-0.00197241	-0.00208424	-0.00241166	-0.00237495	-0.00197717	-0.00196373		86159	-0.00198398	-0.00205412	0.0015548	-0.00241367	-0.00197241	-0.00208425	-0.00241165	-0.002375	-0.00197718	-0.00196372
86160	-0.00198395	-0.0020541	0.00155481	-0.00241373	-0.00197236	-0.00208426	-0.00241163	-0.002375	-0.00197719	-0.00196379		86160	-0.00198395	-0.00205409	0.0015548	-0.00241366	-0.0019724	-0.00208422	-0.00241166	-0.00237495	-0.00197717	-0.00196371		86160	-0.00198397	-0.00205411	0.0015548	-0.00241367	-0.00197241	-0.00208424	-0.00241166	-0.00237495	-0.00197717	-0.00196373		86160	-0.00198398	-0.00205412	0.0015548	-0.00241367	-0.00197241	-0.00208425	-0.00241165	-0.002375	-0.00197718	-0.00196372
86161	-0.00198395	-0.0020541	0.00155481	-0.00241373	-0.00197236	-0.00208426	-0.00241163	-0.002375	-0.00197719	-0.00196379		86161	-0.00198395	-0.00205409	0.0015548	-0.00241366	-0.0019724	-0.00208422	-0.00241166	-0.00237495	-0.00197717	-0.00196371		86161	-0.00198397	-0.00205411	0.0015548	-0.00241367	-0.00197241	-0.00208424	-0.00241166	-0.00237495	-0.00197717	-0.00196373		86161	-0.00198398	-0.00205412	0.0015548	-0.00241367	-0.00197241	-0.00208425	-0.00241165	-0.002375	-0.00197718	-0.00196372
86162	-0.00198395	-0.0020541	0.00155481	-0.00241373	-0.00197236	-0.00208426	-0.00241163	-0.002375	-0.00197719	-0.00196379		86162	-0.00198395	-0.00205409	0.0015548	-0.00241366	-0.0019724	-0.00208422	-0.00241166	-0.00237495	-0.00197717	-0.00196371		86162	-0.00198397	-0.00205411	0.0015548	-0.00241367	-0.00197241	-0.00208424	-0.00241166	-0.00237495	-0.00197717	-0.00196373		86162	-0.00198398	-0.00205412	0.0015548	-0.00241367	-0.00197241	-0.00208425	-0.00241165	-0.002375	-0.00197718	-0.00196372
86163	-0.00198395	-0.0020541	0.00155481	-0.00241373	-0.00197236	-0.00208426	-0.00241163	-0.002375	-0.00197719	-0.00196379		86163	-0.00198395	-0.00205409	0.0015548	-0.00241366	-0.0019724	-0.00208422	-0.00241166	-0.00237495	-0.00197717	-0.00196371		86163	-0.00198397	-0.00205411	0.0015548	-0.00241367	-0.00197241	-0.00208424	-0.00241166	-0.00237495	-0.00197717	-0.00196373		86163	-0.00198398	-0.00205412	0.0015548	-0.00241367	-0.00197241	-0.00208425	-0.00241165	-0.002375	-0.00197718	-0.00196372
86164	-0.00198395	-0.0020541	0.00155481	-0.00241373	-0.00197236	-0.00208426	-0.00241163	-0.002375	-0.00197719	-0.00196379		86164	-0.00198395	-0.00205409	0.0015548	-0.00241366	-0.0019724	-0.00208422	-0.00241166	-0.00237495	-0.00197717	-0.00196371		86164	-0.00198397	-0.00205411	0.0015548	-0.00241367	-0.00197241	-0.00208424	-0.00241166	-0.00237495	-0.00197717	-0.00196373		86164	-0.00198398	-0.00205412	0.0015548	-0.00241367	-0.00197241	-0.00208425	-0.00241165	-0.002375	-0.00197718	-0.00196372
86165	-0.00198395	-0.0020541	0.00155481	-0.00241373	-0.00197236	-0.00208426	-0.00241163	-0.002375	-0.00197719	-0.00196379		86165	-0.00198395	-0.00205409	0.0015548	-0.00241366	-0.0019724	-0.00208422	-0.00241166	-0.00237495	-0.00197717	-0.00196371		86165	-0.00198397	-0.00205411	0.0015548	-0.00241367	-0.00197241	-0.00208424	-0.00241166	-0.00237495	-0.00197717	-0.00196373		86165	-0.00198398	-0.00205412	0.0015548	-0.00241367	-0.00197241	-0.00208425	-0.00241165	-0.002375	-0.00197718	-0.00196372
86166	-0.00198395	-0.0020541	0.00155481	-0.00241373	-0.00197236	-0.00208426	-0.00241163	-0.002375	-0.00197719	-0.00196379		86166	-0.00198395	-0.00205409	0.0015548	-0.00241366	-0.0019724	-0.00208422	-0.00241166	-0.00237495	-0.00197717	-0.00196371		86166	-0.00198397	-0.00205411	0.0015548	-0.00241367	-0.00197241	-0.00208424	-0.00241166	-0.00237495	-0.00197717	-0.00196373		86166	-0.00198398	-0.00205412	0.0015548	-0.00241367	-0.00197241	-0.00208425	-0.00241165	-0.002375	-0.00197718	-0.00196372
86167	-0.00198395	-0.0020541	0.00155481	-0.00241373	-0.00197236	-0.00208426	-0.00241163	-0.002375	-0.00197719	-0.00196379		86167	-0.00198395	-0.00205409	0.0015548	-0.00241366	-0.0019724	-0.00208422	-0.00241166	-0.00237495	-0.00197717	-0.00196371		86167	-0.00198397	-0.00205411	0.0015548	-0.00241367	-0.00197241	-0.00208424	-0.00241166	-0.00237495	-0.00197717	-0.00196373		86167	-0.00198398	-0.00205412	0.0015548	-0.00241367	-0.00197241	-0.00208425	-0.00241165	-0.002375	-0.00197718	-0.00196372
86168	-0.00198395	-0.0020541	0.00155481	-0.00241373	-0.00197236	-0.00208426	-0.00241163	-0.002375	-0.00197719	-0.00196379		86168	-0.00198395	-0.00205409	0.0015548	-0.00241366	-0.0019724	-0.00208422	-0.00241166	-0.00237495	-0.00197717	-0.00196371		86168	-0.00198397	-0.00205411	0.0015548	-0.00241367	-0.00197241	-0.00208424	-0.00241166	-0.00237495	-0.00197717	-0.00196373		86168	-0.00198398	-0.00205412	0.0015548	-0.00241367	-0.00197241	-0.00208425	-0.00241165	-0.002375	-0.00197718	-0.00196372
86169	-0.00198395	-0.0020541	0.00155481	-0.00241373	-0.00197236	-0.00208426	-0.00241163	-0.002375	-0.00197719	-0.00196379		86169	-0.00198395	-0.00205409	0.0015548	-0.00241366	-0.0019724	-0.00208422	-0.00241166	-0.00237495	-0.00197717	-0.00196371		86169	-0.00198397	-0.00205411	0.0015548	-0.00241367	-0.00197241	-0.00208424	-0.00241166	-0.00237495	-0.00197717	-0.00196373		86169	-0.00198398	-0.00205412	0.0015548	-0.00241367	-0.00197241	-0.00208425	-0.00241165	-0.002375	-0.00197718	-0.00196372
86170	-0.00198395	-0.0020541	0.00155481	-0.00241373	-0.00197236	-0.00208426	-0.00241163	-0.002375	-0.00197719	-0.00196379		86170	-0.00198395	-0.00205409	0.0015548	-0.00241366	-0.0019724	-0.00208422	-0.00241166	-0.00237495	-0.00197717	-0.00196371		86170	-0.00198397	-0.00205411	0.0015548	-0.00241367	-0.00197241	-0.00208424	-0.00241166	-0.00237495	-0.00197717	-0.00196373		86170	-0.00198398	-0.00205412	0.0015548	-0.00241367	-0.00197241	-0.00208425	-0.00241165	-0.002375	-0.00197718	-0.00196372
86171	-0.00198395	-0.0020541	0.00155481	-0.00241373	-0.00197236	-0.00208426	-0.00241163	-0.002375	-0.00197719	-0.00196379		86171	-0.00198395	-0.00205409	0.0015548	-0.00241366	-0.0019724	-0.00208422	-0.00241166	-0.00237495	-0.00197717	-0.00196371		86171	-0.00198397	-0.00205411	0.0015548	-0.00241367	-0.00197241	-0.00208424	-0.00241166	-0.00237495	-0.00197717	-0.00196373		86171	-0.00198398	-0.00205412	0.0015548	-0.00241367	-0.00197241	-0.00208425	-0.00241165	-0.002375	-0.00197718	-0.00196372
86172	-0.00198395	-0.0020541	0.00155481	-0.00241373	-0.00197236	-0.00208426	-0.00241163	-0.002375	-0.00197719	-0.00196379		86172	-0.00198395	-0.00205409	0.0015548	-0.00241366	-0.0019724	-0.00208422	-0.00241166	-0.00237495	-0.00197717	-0.00196371		86172	-0.00198397	-0.00205411	0.0015548	-0.00241367	-0.00197241	-0.00208424	-0.00241166	-0.00237495	-0.00197717	-0.00196373		86172	-0.00198398	-0.00205412	0.0015548	-0.00241367	-0.00197241	-0.00208425	-0.00241165	-0.002375	-0.00197718	-0.00196372
86173	-0.00198395	-0.0020541	0.00155481	-0.00241373	-0.00197236	-0.00208426	-0.00241163	-0.002375	-0.00197719	-0.00196379		86173	-0.00198395	-0.00205409	0.0015548	-0.00241366	-0.0019724	-0.00208422	-0.00241166	-0.00237495	-0.00197717	-0.00196371		86173	-0.00198397	-0.00205411	0.0015548	-0.00241367	-0.00197241	-0.00208424	-0.00241166	-0.00237495	-0.00197717	-0.00196373		86173	-0.00198398	-0.00205412	0.0015548	-0.00241367	-0.00197241	-0.00208425	-0.00241165	-0.002375	-0.00197718	-0.00196372
86174	-0.00198395	-0.0020541	0.00155481	-0.00241373	-0.00197236	-0.00208426	-0.00241163	-0.002375	-0.00197719	-0.00196379		86174	-0.00198395	-0.00205409	0.0015548	-0.00241366	-0.0019724	-0.00208422	-0.00241166	-0.00237495	-0.00197717	-0.00196371		86174	-0.00198397	-0.00205411	0.0015548	-0.00241367	-0.00197241	-0.00208424	-0.00241166	-0.00237495	-0.00197717	-0.00196373		86174	-0.00198398	-0.00205412	0.0015548	-0.00241367	-0.00197241	-0.00208425	-0.00241165	-0.002375	-0.00197718	-0.00196372
86175	-0.00198395	-0.0020541	0.00155481	-0.00241373	-0.00197236	-0.00208426	-0.00241163	-0.002375	-0.00197719	-0.00196379		86175	-0.00198395	-0.00205409	0.0015548	-0.00241366	-0.0019724	-0.00208422	-0.00241166	-0.00237495	-0.00197717	-0.00196371		86175	-0.00198397	-0.00205411	0.0015548	-0.00241367	-0.00197241	-0.00208424	-0.00241166	-0.00237495	-0.00197717	-0.00196373		86175	-0.00198398	-0.00205412	0.0015548	-0.00241367	-0.00197241	-0.00208425	-0.00241165	-0.002375	-0.00197718	-0.00196372
86176	-0.00198395	-0.0020541	0.00155481	-0.00241373	-0.00197236	-0.00208426	-0.00241163	-0.002375	-0.00197719	-0.00196379		86176	-0.00198395	-0.00205409	0.0015548	-0.00241366	-0.0019724	-0.00208422	-0.00241166	-0.00237495	-0.00197717	-0.00196371		86176	-0.00198397	-0.00205411	0.0015548	-0.00241367	-0.00197241	-0.00208424	-0.00241166	-0.00237495	-0.00197717	-0.00196373		86176	-0.00198398	-0.00205412	0.0015548	-0.00241367	-0.00197241	-0.00208425	-0.00241165	-0.002375	-0.00197718	-0.00196372
86177	-0.00198395	-0.0020541	0.00155481	-0.00241373	-0.00197236	-0.00208426	-0.00241163	-0.002375	-0.00197719	-0.00196379		86177	-0.00198395	-0.00205409	0.0015548	-0.00241366	-0.0019724	-0.00208422	-0.00241166	-0.00237495	-0.00197717	-0.00196371		86177	-0.00198397	-0.00205411	0.0015548	-0.00241367	-0.00197241	-0.00208424	-0.00241166	-0.00237495	-0.00197717	-0.00196373		86177	-0.00198398	-0.00205412	0.0015548	-0.00241367	-0.00197241	-0.00208425	-0.00241165	-0.002375	-0.00197718	-0.00196372
86178	-0.00198395	-0.0020541	0.00155481	-0.00241373	-0.00197236	-0.00208426	-0.00241163	-0.002375	-0.00197719	-0.00196379		86178	-0.00198395	-0.00205409	0.0015548	-0.00241366	-0.0019724	-0.00208422	-0.00241166	-0.00237495	-0.00197717	-0.00196371		86178	-0.00198397	-0.00205411	0.0015548	-0.00241367	-0.00197241	-0.00208424	-0.00241166	-0.00237495	-0.00197717	-0.00196373		86178	-0.00198398	-0.00205412	0.0015548	-0.00241367	-0.00197241	-0.00208425	-0.00241165	-0.002375	-0.00197718	-0.00196372
86179	-0.00198395	-0.0020541	0.00155481	-0.00241373	-0.00197236	-0.00208426	-0.00241163	-0.002375	-0.00197719	-0.00196379		86179	-0.00198395	-0.00205409	0.0015548	-0.00241366	-0.0019724	-0.00208422	-0.00241166	-0.00237495	-0.00197717	-0.00196371		86179	-0.00198397	-0.00205411	0.0015548	-0.00241367	-0.00197241	-0.00208424	-0.00241166	-0.00237495	-0.00197717	-0.00196373		86179	-0.00198398	-0.00205412	0.0015548	-0.00241367	-0.00197241	-0.00208425	-0.00241165	-0.002375	-0.00197718	-0.00196372
86180	-0.00198395	-0.0020541	0.00155481	-0.00241373	-0.00197236	-0.00208426	-0.00241163	-0.002375	-0.00197719	-0.00196379		86180	-0.00198395	-0.00205409	0.0015548	-0.00241366	-0.0019724	-0.00208422	-0.00241166	-0.00237495	-0.00197717	-0.00196371		86180	-0.00198397	-0.00205411	0.0015548	-0.00241367	-0.00197241	-0.00208424	-0.00241166	-0.00237495	-0.00197717	-0.00196373		86180	-0.00198398	-0.00205412	0.0015548	-0.00241367	-0.00197241	-0.00208425	-0.00241165	-0.002375	-0.00197718	-0.00196372
86181	-0.00198395	-0.0020541	0.00155481	-0.00241373	-0.00197236	-0.00208426	-0.00241163	-0.002375	-0.00197719	-0.00196379		86181	-0.00198395	-0.00205409	0.0015548	-0.00241366	-0.0019724	-0.00208422	-0.00241166	-0.00237495	-0.00197717	-0.00196371		86181	-0.00198397	-0.00205411	0.0015548	-0.00241367	-0.00197241	-0.00208424	-0.00241166	-0.00237495	-0.00197717	-0.00196373		86181	-0.00198398	-0.00205412	0.0015548	-0.00241367	-0.00197241	-0.00208425	-0.00241165	-0.002375	-0.00197718	-0.00196372
86182	-0.00198395	-0.0020541	0.00155481	-0.00241373	-0.00197236	-0.00208426	-0.00241163	-0.002375	-0.00197719	-0.00196379		86182	-0.00198395	-0.00205409	0.0015548	-0.00241366	-0.0019724	-0.00208422	-0.00241166	-0.00237495	-0.00197717	-0.00196371		86182	-0.00198397	-0.00205411	0.0015548	-0.00241367	-0.00197241	-0.00208424	-0.00241166	-0.00237495	-0.00197717	-0.00196373		86182	-0.00198398	-0.00205412	0.0015548	-0.00241367	-0.00197241	-0.00208425	-0.00241165	-0.002375	-0.00197718	-0.00196372
86183	-0.00198395	-0.0020541	0.00155481	-0.00241373	-0.00197236	-0.00208426	-0.00241163	-0.002375	-0.00197719	-0.00196379		86183	-0.00198395	-0.00205409	0.0015548	-0.00241366	-0.0019724	-0.00208422	-0.00241166	-0.00237495	-0.00197717	-0.00196371		86183	-0.00198397	-0.00205411	0.0015548	-0.00241367	-0.00197241	-0.00208424	-0.00241166	-0.00237495	-0.00197717	-0.00196373		86183	-0.00198398	-0.00205412	0.0015548	-0.00241367	-0.00197241	-0.00208425	-0.00241165	-0.002375	-0.00197718	-0.00196372
86184	-0.00198395	-0.0020541	0.00155481	-0.00241373	-0.00197236	-0.00208426	-0.00241163	-0.002375	-0.00197719	-0.00196379		86184	-0.00198395	-0.00205409	0.0015548	-0.00241366	-0.0019724	-0.00208422	-0.00241166	-0.00237495	-0.00197717	-0.00196371		86184	-0.00198397	-0.00205411	0.0015548	-0.00241367	-0.00197241	-0.00208424	-0.00241166	-0.00237495	-0.00197717	-0.00196373		86184	-0.00198398	-0.00205412	0.0015548	-0.00241367	-0.00197241	-0.00208425	-0.00241165	-0.002375	-0.00197718	-0.00196372
86185	-0.00198395	-0.0020541	0.00155481	-0.00241373	-0.00197236	-0.00208426	-0.00241163	-0.002375	-0.00197719	-0.00196379		86185	-0.00198395	-0.00205409	0.0015548	-0.00241366	-0.0019724	-0.00208422	-0.00241166	-0.00237495	-0.00197717	-0.00196371		86185	-0.00198397	-0.00205411	0.0015548	-0.00241367	-0.00197241	-0.00208424	-0.00241166	-0.00237495	-0.00197717	-0.00196373		86185	-0.00198398	-0.00205412	0.0015548	-0.00241367	-0.00197241	-0.00208425	-0.00241165	-0.002375	-0.00197718	-0.00196372
86186	-0.00198395	-0.0020541	0.00155481	-0.00241373	-0.00197236	-0.00208426	-0.00241163	-0.002375	-0.00197719	-0.00196379		86186	-0.00198395	-0.00205409	0.0015548	-0.00241366	-0.0019724	-0.00208422	-0.00241166	-0.00237495	-0.00197717	-0.00196371		86186	-0.00198397	-0.00205411	0.0015548	-0.00241367	-0.00197241	-0.00208424	-0.00241166	-0.00237495	-0.00197717	-0.00196373		86186	-0.00198398	-0.00205412	0.0015548	-0.00241367	-0.00197241	-0.00208425	-0.00241165	-0.002375	-0.00197718	-0.00196372
86187	-0.00198395	-0.0020541	0.00155481	-0.00241373	-0.00197236	-0.00208426	-0.00241163	-0.002375	-0.00197719	-0.00196379		86187	-0.00198395	-0.00205409	0.0015548	-0.00241366	-0.0019724	-0.00208422	-0.00241166	-0.00237495	-0.00197717	-0.00196371		86187	-0.00198397	-0.00205411	0.0015548	-0.00241367	-0.00197241	-0.00208424	-0.00241166	-0.00237495	-0.00197717	-0.00196373		86187	-0.00198398	-0.00205412	0.0015548	-0.00241367	-0.00197241	-0.00208425	-0.00241165	-0.002375	-0.00197718	-0.00196372
86188	-0.00198395	-0.0020541	0.00155481	-0.00241373	-0.00197236	-0.00208426	-0.00241163	-0.002375	-0.00197719	-0.00196379		86188	-0.00198395	-0.00205409	0.0015548	-0.00241366	-0.0019724	-0.00208422	-0.00241166	-0.00237495	-0.00197717	-0.00196371		86188	-0.00198397	-0.00205411	0.0015548	-0.00241367	-0.00197241	-0.00208424	-0.00241166	-0.00237495	-0.00197717	-0.00196373		86188	-0.00198398	-0.00205412	0.0015548	-0.00241367	-0.00197241	-0.00208425	-0.00241165	-0.002375	-0.00197718	-0.00196372
86189	-0.00198395	-0.0020541	0.00155481	-0.00241373	-0.00197236	-0.00208426	-0.00241163	-0.002375	-0.00197719	-0.00196379		86189	-0.00198395	-0.00205409	0.0015548	-0.00241366	-0.0019724	-0.00208422	-0.00241166	-0.00237495	-0.00197717	-0.00196371		86189	-0.00198397	-0.00205411	0.0015548	-0.00241367	-0.00197241	-0.00208424	-0.00241166	-0.00237495	-0.00197717	-0.00196373		86189	-0.00198398	-0.00205412	0.0015548	-0.00241367	-0.00197241	-0.00208425	-0.00241165	-0.002375	-0.00197718	-0.00196372
86190	-0.00198395	-0.0020541	0.00155481	-0.00241373	-0.00197236	-0.00208426	-0.00241163	-0.002375	-0.00197719	-0.00196379		86190	-0.00198395	-0.00205409	0.0015548	-0.00241366	-0.0019724	-0.00208422	-0.00241166	-0.00237495	-0.00197717	-0.00196371		86190	-0.00198397	-0.00205411	0.0015548	-0.00241367	-0.00197241	-0.00208424	-0.00241166	-0.00237495	-0.00197717	-0.00196373		86190	-0.00198398	-0.00205412	0.0015548	-0.00241367	-0.00197241	-0.00208425	-0.00241165	-0.002375	-0.00197718	-0.00196372
86191	-0.00198395	-0.0020541	0.00155481	-0.00241373	-0.00197236	-0.00208426	-0.00241163	-0.002375	-0.00197719	-0.00196379		86191	-0.00198395	-0.00205409	0.0015548	-0.00241366	-0.0019724	-0.00208422	-0.00241166	-0.00237495	-0.00197717	-0.00196371		86191	-0.00198397	-0.00205411	0.0015548	-0.00241367	-0.00197241	-0.00208424	-0.00241166	-0.00237495	-0.00197717	-0.00196373		86191	-0.00198398	-0.00205412	0.0015548	-0.00241367	-0.00197241	-0.00208425	-0.00241165	-0.002375	-0.00197718	-0.00196372
86192	-0.00198395	-0.0020541	0.00155481	-0.00241373	-0.00197236	-0.00208426	-0.00241163	-0.002375	-0.00197719	-0.00196379		86192	-0.00198395	-0.00205409	0.0015548	-0.00241366	-0.0019724	-0.00208422	-0.00241166	-0.00237495	-0.00197717	-0.00196371		86192	-0.00198397	-0.00205411	0.0015548	-0.00241367	-0.00197241	-0.00208424	-0.00241166	-0.00237495	-0.00197717	-0.00196373		86192	-0.00198398	-0.00205412	0.0015548	-0.00241367	-0.00197241	-0.00208425	-0.00241165	-0.002375	-0.00197718	-0.00196372
86193	-0.00198395	-0.0020541	0.00155481	-0.00241373	-0.00197236	-0.00208426	-0.00241163	-0.002375	-0.00197719	-0.00196379		86193	-0.00198395	-0.00205409	0.0015548	-0.00241366	-0.0019724	-0.00208422	-0.00241166	-0.00237495	-0.00197717	-0.00196371		86193	-0.00198397	-0.00205411	0.0015548	-0.00241367	-0.00197241	-0.00208424	-0.00241166	-0.00237495	-0.00197717	-0.00196373		86193	-0.00198398	-0.00205412	0.0015548	-0.00241367	-0.00197241	-0.00208425	-0.00241165	-0.002375	-0.00197718	-0.00196372
86194	-0.00198395	-0.0020541	0.00155481	-0.00241373	-0.00197236	-0.00208426	-0.00241163	-0.002375	-0.00197719	-0.00196379		86194	-0.00198395	-0.00205409	0.0015548	-0.00241366	-0.0019724	-0.00208422	-0.00241166	-0.00237495	-0.00197717	-0.00196371		86194	-0.00198397	-0.00205411	0.0015548	-0.00241367	-0.00197241	-0.00208424	-0.00241166	-0.00237495	-0.00197717	-0.00196373		86194	-0.00198398	-0.00205412	0.0015548	-0.00241367	-0.00197241	-0.00208425	-0.00241165	-0.002375	-0.00197718	-0.00196372
86195	-0.00198395	-0.0020541	0.00155481	-0.00241373	-0.00197236	-0.00208426	-0.00241163	-0.002375	-0.00197719	-0.00196379		86195	-0.00198395	-0.00205409	0.0015548	-0.00241366	-0.0019724	-0.00208422	-0.00241166	-0.00237495	-0.00197717	-0.00196371		86195	-0.00198397	-0.00205411	0.0015548	-0.00241367	-0.00197241	-0.00208424	-0.00241166	-0.00237495	-0.00197717	-0.00196373		86195	-0.00198398	-0.00205412	0.0015548	-0.00241367	-0.00197241	-0.00208425	-0.00241165	-0.002375	-0.00197718	-0.00196372
86196	-0.00198395	-0.0020541	0.00155481	-0.00241373	-0.00197236	-0.00208426	-0.00241163	-0.002375	-0.00197719	-0.00196379		86196	-0.00198395	-0.00205409	0.0015548	-0.00241366	-0.0019724	-0.00208422	-0.00241166	-0.00237495	-0.00197717	-0.00196371		86196	-0.00198397	-0.00205411	0.0015548	-0.00241367	-0.00197241	-0.00208424	-0.00241166	-0.00237495	-0.00197717	-0.00196373		86196	-0.00198398	-0.00205412	0.0015548	-0.00241367	-0.00197241	-0.00208425	-0.00241165	-0.002375	-0.00197718	-0.00196372
86197	-0.00198395	-0.0020541	0.00155481	-0.00241373	-0.00197236	-0.00208426	-0.00241163	-0.002375	-0.00197719	-0.00196379		86197	-0.00198395	-0.00205409	0.0015548	-0.00241366	-0.0019724	-0.00208422	-0.00241166	-0.00237495	-0.00197717	-0.00196371		86197	-0.00198397	-0.00205411	0.0015548	-0.00241367	-0.00197241	-0.00208424	-0.00241166	-0.00237495	-0.00197717	-0.00196373		86197	-0.00198398	-0.00205412	0.0015548	-0.00241367	-0.00197241	-0.00208425	-0.00241165	-0.002375	-0.00197718	-0.00196372
86198	-0.00198395	-0.0020541	0.00155481	-0.00241373	-0.00197236	-0.00208426	-0.00241163	-0.002375	-0.00197719	-0.00196379		86198	-0.00198395	-0.00205409	0.0015548	-0.00241366	-0.0019724	-0.00208422	-0.00241166	-0.00237495	-0.00197717	-0.00196371		86198	-0.00198397	-0.00205411	0.0015548	-0.00241367	-0.00197241	-0.00208424	-0.00241166	-0.00237495	-0.00197717	-0.00196373		86198	-0.00198398	-0.00205412	0.0015548	-0.00241367	-0.00197241	-0.00208425	-0.00241165	-0.002375	-0.00197718	-0.00196372
86199	-0.00198395	-0.0020541	0.00155481	-0.00241373	-0.00197236	-0.00208426	-0.00241163	-0.002375	-0.00197719	-0.00196379		86199	-0.00198395	-0.00205409	0.0015548	-0.00241366	-0.0019724	-0.00208422	-0.00241166	-0.00237495	-0.00197717	-0.00196371		86199	-0.00198397	-0.00205411	0.0015548	-0.00241367	-0.00197241	-0.00208424	-0.00241166	-0.00237495	-0.00197717	-0.00196373		86199	-0.00198398	-0.00205412	0.0015548	-0.00241367	-0.00197241	-0.00208425	-0.00241165	-0.002375	-0.00197718	-0.00196372
86200	-0.00198395	-0.0020541	0.00155481	-0.00241373	-0.00197236	-0.00208426	-0.00241163	-0.002375	-0.00197719	-0.00196379		86200	-0.00198395	-0.00205409	0.0015548	-0.00241366	-0.0019724	-0.00208422	-0.00241166	-0.00237495	-0.00197717	-0.00196371		86200	-0.00198397	-0.00205411	0.0015548	-0.00241367	-0.00197241	-0.00208424	-0.00241166	-0.00237495	-0.00197717	-0.00196373		86200	-0.00198398	-0.00205412	0.0015548	-0.00241367	-0.00197241	-0.00208425	-0.00241165	-0.002375	-0.00197718	-0.00196372
86201	-0.00198395	-0.0020541	0.00155481	-0.00241373	-0.00197236	-0.00208426	-0.00241163	-0.002375	-0.00197719	-0.00196379		86201	-0.00198395	-0.00205409	0.0015548	-0.00241366	-0.0019724	-0.00208422	-0.00241166	-0.00237495	-0.00197717	-0.00196371		86201	-0.00198397	-0.00205411	0.0015548	-0.00241367	-0.00197241	-0.00208424	-0.00241166	-0.00237495	-0.00197717	-0.00196373		86201	-0.00198398	-0.00205412	0.0015548	-0.00241367	-0.00197241	-0.00208425	-0.00241165	-0.002375	-0.00197718	-0.00196372
86202	-0.00198395	-0.0020541	0.00155481	-0.00241373	-0.00197236	-0.00208426	-0.00241163	-0.002375	-0.00197719	-0.00196379		86202	-0.00198395	-0.00205409	0.0015548	-0.00241366	-0.0019724	-0.00208422	-0.00241166	-0.00237495	-0.00197717	-0.00196371		86202	-0.00198397	-0.00205411	0.0015548	-0.00241367	-0.00197241	-0.00208424	-0.00241166	-0.00237495	-0.00197717	-0.00196373		86202	-0.00198398	-0.00205412	0.0015548	-0.00241367	-0.00197241	-0.00208425	-0.00241165	-0.002375	-0.00197718	-0.00196372
86203	-0.00198395	-0.0020541	0.00155481	-0.00241373	-0.00197236	-0.00208426	-0.00241163	-0.002375	-0.00197719	-0.00196379		86203	-0.00198395	-0.00205409	0.0015548	-0.00241366	-0.0019724	-0.00208422	-0.00241166	-0.00237495	-0.00197717	-0.00196371		86203	-0.00198397	-0.00205411	0.0015548	-0.00241367	-0.00197241	-0.00208424	-0.00241166	-0.00237495	-0.00197717	-0.00196373		86203	-0.00198398	-0.00205412	0.0015548	-0.00241367	-0.00197241	-0.00208425	-0.00241165	-0.002375	-0.00197718	-0.00196372
86204	-0.00198395	-0.0020541	0.00155481	-0.00241373	-0.00197236	-0.00208426	-0.00241163	-0.002375	-0.00197719	-0.00196379		86204	-0.00198395	-0.00205409	0.0015548	-0.00241366	-0.0019724	-0.00208422	-0.00241166	-0.00237495	-0.00197717	-0.00196371		86204	-0.00198397	-0.00205411	0.0015548	-0.00241367	-0.00197241	-0.00208424	-0.00241166	-0.00237495	-0.00197717	-0.00196373		86204	-0.00198398	-0.00205412	0.0015548	-0.00241367	-0.00197241	-0.00208425	-0.00241165	-0.002375	-0.00197718	-0.00196372
86205	-0.00198395	-0.0020541	0.00155481	-0.00241373	-0.00197236	-0.00208426	-0.00241163	-0.002375	-0.00197719	-0.00196379		86205	-0.00198395	-0.00205409	0.0015548	-0.00241366	-0.0019724	-0.00208422	-0.00241166	-0.00237495	-0.00197717	-0.00196371		86205	-0.00198397	-0.00205411	0.0015548	-0.00241367	-0.00197241	-0.00208424	-0.00241166	-0.00237495	-0.00197717	-0.00196373		86205	-0.00198398	-0.00205412	0.0015548	-0.00241367	-0.00197241	-0.00208425	-0.00241165	-0.002375	-0.00197718	-0.00196372
86206	-0.00198395	-0.0020541	0.00155481	-0.00241373	-0.00197236	-0.00208426	-0.00241163	-0.002375	-0.00197719	-0.00196379		86206	-0.00198395	-0.00205409	0.0015548	-0.00241366	-0.0019724	-0.00208422	-0.00241166	-0.00237495	-0.00197717	-0.00196371		86206	-0.00198397	-0.00205411	0.0015548	-0.00241367	-0.00197241	-0.00208424	-0.00241166	-0.00237495	-0.00197717	-0.00196373		86206	-0.00198398	-0.00205412	0.0015548	-0.00241367	-0.00197241	-0.00208425	-0.00241165	-0.002375	-0.00197718	-0.00196372
86207	-0.00198395	-0.0020541	0.00155481	-0.00241373	-0.00197236	-0.00208426	-0.00241163	-0.002375	-0.00197719	-0.00196379		86207	-0.00198395	-0.00205409	0.0015548	-0.00241366	-0.0019724	-0.00208422	-0.00241166	-0.00237495	-0.00197717	-0.00196371		86207	-0.00198397	-0.00205411	0.0015548	-0.00241367	-0.00197241	-0.00208424	-0.00241166	-0.00237495	-0.00197717	-0.00196373		86207	-0.00198398	-0.00205412	0.0015548	-0.00241367	-0.00197241	-0.00208425	-0.00241165	-0.002375	-0.00197718	-0.00196372
86208	-0.00198395	-0.0020541	0.00155481	-0.00241373	-0.00197236	-0.00208426	-0.00241163	-0.002375	-0.00197719	-0.00196379		86208	-0.00198395	-0.00205409	0.0015548	-0.00241366	-0.0019724	-0.00208422	-0.00241166	-0.00237495	-0.00197717	-0.00196371		86208	-0.00198397	-0.00205411	0.0015548	-0.00241367	-0.00197241	-0.00208424	-0.00241166	-0.00237495	-0.00197717	-0.00196373		86208	-0.00198398	-0.00205412	0.0015548	-0.00241367	-0.00197241	-0.00208425	-0.00241165	-0.002375	-0.00197718	-0.00196372
86209	-0.00198395	-0.0020541	0.00155481	-0.00241373	-0.00197236	-0.00208426	-0.00241163	-0.002375	-0.00197719	-0.00196379		86209	-0.00198395	-0.00205409	0.0015548	-0.00241366	-0.0019724	-0.00208422	-0.00241166	-0.00237495	-0.00197717	-0.00196371		86209	-0.00198397	-0.00205411	0.0015548	-0.00241367	-0.00197241	-0.00208424	-0.00241166	-0.00237495	-0.00197717	-0.00196373		86209	-0.00198398	-0.00205412	0.0015548	-0.00241367	-0.00197241	-0.00208425	-0.00241165	-0.002375	-0.00197718	-0.00196372
86210	-0.00198395	-0.0020541	0.00155481	-0.00241373	-0.00197236	-0.00208426	-0.00241163	-0.002375	-0.00197719	-0.00196379		86210	-0.00198395	-0.00205409	0.0015548	-0.00241366	-0.0019724	-0.00208422	-0.00241166	-0.00237495	-0.00197717	-0.00196371		86210	-0.00198397	-0.00205411	0.0015548	-0.00241367	-0.00197241	-0.00208424	-0.00241166	-0.00237495	-0.00197717	-0.00196373		86210	-0.00198398	-0.00205412	0.0015548	-0.00241367	-0.00197241	-0.00208425	-0.00241165	-0.002375	-0.00197718	-0.00196372
86211	-0.00198395	-0.0020541	0.00155481	-0.00241373	-0.00197236	-0.00208426	-0.00241163	-0.002375	-0.00197719	-0.00196379		86211	-0.00198395	-0.00205409	0.0015548	-0.00241366	-0.0019724	-0.00208422	-0.00241166	-0.00237495	-0.00197717	-0.00196371		86211	-0.00198397	-0.00205411	0.0015548	-0.00241367	-0.00197241	-0.00208424	-0.00241166	-0.00237495	-0.00197717	-0.00196373		86211	-0.00198398	-0.00205412	0.0015548	-0.00241367	-0.00197241	-0.00208425	-0.00241165	-0.002375	-0.00197718	-0.00196372
86212	-0.00198395	-0.0020541	0.00155481	-0.00241373	-0.00197236	-0.00208426	-0.00241163	-0.002375	-0.00197719	-0.00196379		86212	-0.00198395	-0.00205409	0.0015548	-0.00241366	-0.0019724	-0.00208422	-0.00241166	-0.00237495	-0.00197717	-0.00196371		86212	-0.00198397	-0.00205411	0.0015548	-0.00241367	-0.00197241	-0.00208424	-0.00241166	-0.00237495	-0.00197717	-0.00196373		86212	-0.00198398	-0.00205412	0.0015548	-0.00241367	-0.00197241	-0.00208425	-0.00241165	-0.002375	-0.00197718	-0.00196372
86213	-0.00198395	-0.0020541	0.00155481	-0.00241373	-0.00197236	-0.00208426	-0.00241163	-0.002375	-0.00197719	-0.00196379		86213	-0.00198395	-0.00205409	0.0015548	-0.00241366	-0.0019724	-0.00208422	-0.00241166	-0.00237495	-0.00197717	-0.00196371		86213	-0.00198397	-0.00205411	0.0015548	-0.00241367	-0.00197241	-0.00208424	-0.00241166	-0.00237495	-0.00197717	-0.00196373		86213	-0.00198398	-0.00205412	0.0015548	-0.00241367	-0.00197241	-0.00208425	-0.00241165	-0.002375	-0.00197718	-0.00196372
86214	-0.00198395	-0.0020541	0.00155481	-0.00241373	-0.00197236	-0.00208426	-0.00241163	-0.002375	-0.00197719	-0.00196379		86214	-0.00198395	-0.00205409	0.0015548	-0.00241366	-0.0019724	-0.00208422	-0.00241166	-0.00237495	-0.00197717	-0.00196371		86214	-0.00198397	-0.00205411	0.0015548	-0.00241367	-0.00197241	-0.00208424	-0.00241166	-0.00237495	-0.00197717	-0.00196373		86214	-0.00198398	-0.00205412	0.0015548	-0.00241367	-0.00197241	-0.00208425	-0.00241165	-0.002375	-0.00197718	-0.00196372
86215	-0.00198395	-0.0020541	0.00155481	-0.00241373	-0.00197236	-0.00208426	-0.00241163	-0.002375	-0.00197719	-0.00196379		86215	-0.00198395	-0.00205409	0.0015548	-0.00241366	-0.0019724	-0.00208422	-0.00241166	-0.00237495	-0.00197717	-0.00196371		86215	-0.00198397	-0.00205411	0.0015548	-0.00241367	-0.00197241	-0.00208424	-0.00241166	-0.00237495	-0.00197717	-0.00196373		86215	-0.00198398	-0.00205412	0.0015548	-0.00241367	-0.00197241	-0.00208425	-0.00241165	-0.002375	-0.00197718	-0.00196372
86216	-0.00198395	-0.0020541	0.00155481	-0.00241373	-0.00197236	-0.00208426	-0.00241163	-0.002375	-0.00197719	-0.00196379		86216	-0.00198395	-0.00205409	0.0015548	-0.00241366	-0.0019724	-0.00208422	-0.00241166	-0.00237495	-0.00197717	-0.00196371		86216	-0.00198397	-0.00205411	0.0015548	-0.00241367	-0.00197241	-0.00208424	-0.00241166	-0.00237495	-0.00197717	-0.00196373		86216	-0.00198398	-0.00205412	0.0015548	-0.00241367	-0.00197241	-0.00208425	-0.00241165	-0.002375	-0.00197718	-0.00196372
86217	-0.00198395	-0.0020541	0.00155481	-0.00241373	-0.00197236	-0.00208426	-0.00241163	-0.002375	-0.00197719	-0.00196379		86217	-0.00198395	-0.00205409	0.0015548	-0.00241366	-0.0019724	-0.00208422	-0.00241166	-0.00237495	-0.00197717	-0.00196371		86217	-0.00198397	-0.00205411	0.0015548	-0.00241367	-0.00197241	-0.00208424	-0.00241166	-0.00237495	-0.00197717	-0.00196373		86217	-0.00198398	-0.00205412	0.0015548	-0.00241367	-0.00197241	-0.00208425	-0.00241165	-0.002375	-0.00197718	-0.00196372
86218	-0.00198395	-0.0020541	0.00155481	-0.00241373	-0.00197236	-0.00208426	-0.00241163	-0.002375	-0.00197719	-0.00196379		86218	-0.00198395	-0.00205409	0.0015548	-0.00241366	-0.0019724	-0.00208422	-0.00241166	-0.00237495	-0.00197717	-0.00196371		86218	-0.00198397	-0.00205411	0.0015548	-0.00241367	-0.00197241	-0.00208424	-0.00241166	-0.00237495	-0.00197717	-0.00196373		86218	-0.00198398	-0.00205412	0.0015548	-0.00241367	-0.00197241	-0.00208425	-0.00241165	-0.002375	-0.00197718	-0.00196372
86219	-0.00198395	-0.0020541	0.00155481	-0.00241373	-0.00197236	-0.00208426	-0.00241163	-0.002375	-0.00197719	-0.00196379		86219	-0.00198395	-0.00205409	0.0015548	-0.00241366	-0.0019724	-0.00208422	-0.00241166	-0.00237495	-0.00197717	-0.00196371		86219	-0.00198397	-0.00205411	0.0015548	-0.00241367	-0.00197241	-0.00208424	-0.00241166	-0.00237495	-0.00197717	-0.00196373		86219	-0.00198398	-0.00205412	0.0015548	-0.00241367	-0.00197241	-0.00208425	-0.00241165	-0.002375	-0.00197718	-0.00196372
86220	-0.00198395	-0.0020541	0.00155481	-0.00241373	-0.00197236	-0.00208426	-0.00241163	-0.002375	-0.00197719	-0.00196379		86220	-0.00198395	-0.00205409	0.0015548	-0.00241366	-0.0019724	-0.00208422	-0.00241166	-0.00237495	-0.00197717	-0.00196371		86220	-0.00198397	-0.00205411	0.0015548	-0.00241367	-0.00197241	-0.00208424	-0.00241166	-0.00237495	-0.00197717	-0.00196373		86220	-0.00198398	-0.00205412	0.0015548	-0.00241367	-0.00197241	-0.00208425	-0.00241165	-0.002375	-0.00197718	-0.00196372
86221	-0.00198395	-0.0020541	0.00155481	-0.00241373	-0.00197236	-0.00208426	-0.00241163	-0.002375	-0.00197719	-0.00196379		86221	-0.00198395	-0.00205409	0.0015548	-0.00241366	-0.0019724	-0.00208422	-0.00241166	-0.00237495	-0.00197717	-0.00196371		86221	-0.00198397	-0.00205411	0.0015548	-0.00241367	-0.00197241	-0.00208424	-0.00241166	-0.00237495	-0.00197717	-0.00196373		86221	-0.00198398	-0.00205412	0.0015548	-0.00241367	-0.00197241	-0.00208425	-0.00241165	-0.002375	-0.00197718	-0.00196372
86222	-0.00198395	-0.0020541	0.00155481	-0.00241373	-0.00197236	-0.00208426	-0.00241163	-0.002375	-0.00197719	-0.00196379		86222	-0.00198395	-0.00205409	0.0015548	-0.00241366	-0.0019724	-0.00208422	-0.00241166	-0.00237495	-0.00197717	-0.00196371		86222	-0.00198397	-0.00205411	0.0015548	-0.00241367	-0.00197241	-0.00208424	-0.00241166	-0.00237495	-0.00197717	-0.00196373		86222	-0.00198398	-0.00205412	0.0015548	-0.00241367	-0.00197241	-0.00208425	-0.00241165	-0.002375	-0.00197718	-0.00196372
86223	-0.00198395	-0.0020541	0.00155481	-0.00241373	-0.00197236	-0.00208426	-0.00241163	-0.002375	-0.00197719	-0.00196379		86223	-0.00198395	-0.00205409	0.0015548	-0.00241366	-0.0019724	-0.00208422	-0.00241166	-0.00237495	-0.00197717	-0.00196371		86223	-0.00198397	-0.00205411	0.0015548	-0.00241367	-0.00197241	-0.00208424	-0.00241166	-0.00237495	-0.00197717	-0.00196373		86223	-0.00198398	-0.00205412	0.0015548	-0.00241367	-0.00197241	-0.00208425	-0.00241165	-0.002375	-0.00197718	-0.00196372
86224	-0.00198395	-0.0020541	0.00155481	-0.00241373	-0.00197236	-0.00208426	-0.00241163	-0.002375	-0.00197719	-0.00196379		86224	-0.00198395	-0.00205409	0.0015548	-0.00241366	-0.0019724	-0.00208422	-0.00241166	-0.00237495	-0.00197717	-0.00196371		86224	-0.00198397	-0.00205411	0.0015548	-0.00241367	-0.00197241	-0.00208424	-0.00241166	-0.00237495	-0.00197717	-0.00196373		86224	-0.00198398	-0.00205412	0.0015548	-0.00241367	-0.00197241	-0.00208425	-0.00241165	-0.002375	-0.00197718	-0.00196372
86225	-0.00198395	-0.0020541	0.00155481	-0.00241373	-0.00197236	-0.00208426	-0.00241163	-0.002375	-0.00197719	-0.00196379		86225	-0.00198395	-0.00205409	0.0015548	-0.00241366	-0.0019724	-0.00208422	-0.00241166	-0.00237495	-0.00197717	-0.00196371		86225	-0.00198397	-0.00205411	0.0015548	-0.00241367	-0.00197241	-0.00208424	-0.00241166	-0.00237495	-0.00197717	-0.00196373		86225	-0.00198398	-0.00205412	0.0015548	-0.00241367	-0.00197241	-0.00208425	-0.00241165	-0.002375	-0.00197718	-0.00196372
86226	-0.00198395	-0.0020541	0.00155481	-0.00241373	-0.00197236	-0.00208426	-0.00241163	-0.002375	-0.00197719	-0.00196379		86226	-0.00198395	-0.00205409	0.0015548	-0.00241366	-0.0019724	-0.00208422	-0.00241166	-0.00237495	-0.00197717	-0.00196371		86226	-0.00198397	-0.00205411	0.0015548	-0.00241367	-0.00197241	-0.00208424	-0.00241166	-0.00237495	-0.00197717	-0.00196373		86226	-0.00198398	-0.00205412	0.0015548	-0.00241367	-0.00197241	-0.00208425	-0.00241165	-0.002375	-0.00197718	-0.00196372
86227	-0.00198395	-0.0020541	0.00155481	-0.00241373	-0.00197236	-0.00208426	-0.00241163	-0.002375	-0.00197719	-0.00196379		86227	-0.00198395	-0.00205409	0.0015548	-0.00241366	-0.0019724	-0.00208422	-0.00241166	-0.00237495	-0.00197717	-0.00196371		86227	-0.00198397	-0.00205411	0.0015548	-0.00241367	-0.00197241	-0.00208424	-0.00241166	-0.00237495	-0.00197717	-0.00196373		86227	-0.00198398	-0.00205412	0.0015548	-0.00241367	-0.00197241	-0.00208425	-0.00241165	-0.002375	-0.00197718	-0.00196372
86228	-0.00198395	-0.0020541	0.00155481	-0.00241373	-0.00197236	-0.00208426	-0.00241163	-0.002375	-0.00197719	-0.00196379		86228	-0.00198395	-0.00205409	0.0015548	-0.00241366	-0.0019724	-0.00208422	-0.00241166	-0.00237495	-0.00197717	-0.00196371		86228	-0.00198397	-0.00205411	0.0015548	-0.00241367	-0.00197241	-0.00208424	-0.00241166	-0.00237495	-0.00197717	-0.00196373		86228	-0.00198398	-0.00205412	0.0015548	-0.00241367	-0.00197241	-0.00208425	-0.00241165	-0.002375	-0.00197718	-0.00196372
86229	-0.00198395	-0.0020541	0.00155481	-0.00241373	-0.00197236	-0.00208426	-0.00241163	-0.002375	-0.00197719	-0.00196379		86229	-0.00198395	-0.00205409	0.0015548	-0.00241366	-0.0019724	-0.00208422	-0.00241166	-0.00237495	-0.00197717	-0.00196371		86229	-0.00198397	-0.00205411	0.0015548	-0.00241367	-0.00197241	-0.00208424	-0.00241166	-0.00237495	-0.00197717	-0.00196373		86229	-0.00198398	-0.00205412	0.0015548	-0.00241367	-0.00197241	-0.00208425	-0.00241165	-0.002375	-0.00197718	-0.00196372
86230	-0.00198395	-0.0020541	0.00155481	-0.00241373	-0.00197236	-0.00208426	-0.00241163	-0.002375	-0.00197719	-0.00196379		86230	-0.00198395	-0.00205409	0.0015548	-0.00241366	-0.0019724	-0.00208422	-0.00241166	-0.00237495	-0.00197717	-0.00196371		86230	-0.00198397	-0.00205411	0.0015548	-0.00241367	-0.00197241	-0.00208424	-0.00241166	-0.00237495	-0.00197717	-0.00196373		86230	-0.00198398	-0.00205412	0.0015548	-0.00241367	-0.00197241	-0.00208425	-0.00241165	-0.002375	-0.00197718	-0.00196372
86231	-0.00198395	-0.0020541	0.00155481	-0.00241373	-0.00197236	-0.00208426	-0.00241163	-0.002375	-0.00197719	-0.00196379		86231	-0.00198395	-0.00205409	0.0015548	-0.00241366	-0.0019724	-0.00208422	-0.00241166	-0.00237495	-0.00197717	-0.00196371		86231	-0.00198397	-0.00205411	0.0015548	-0.00241367	-0.00197241	-0.00208424	-0.00241166	-0.00237495	-0.00197717	-0.00196373		86231	-0.00198398	-0.00205412	0.0015548	-0.00241367	-0.00197241	-0.00208425	-0.00241165	-0.002375	-0.00197718	-0.00196372
86232	-0.00198395	-0.0020541	0.00155481	-0.00241373	-0.00197236	-0.00208426	-0.00241163	-0.002375	-0.00197719	-0.00196379		86232	-0.00198395	-0.00205409	0.0015548	-0.00241366	-0.0019724	-0.00208422	-0.00241166	-0.00237495	-0.00197717	-0.00196371		86232	-0.00198397	-0.00205411	0.0015548	-0.00241367	-0.00197241	-0.00208424	-0.00241166	-0.00237495	-0.00197717	-0.00196373		86232	-0.00198398	-0.00205412	0.0015548	-0.00241367	-0.00197241	-0.00208425	-0.00241165	-0.002375	-0.00197718	-0.00196372
86233	-0.00198395	-0.0020541	0.00155481	-0.00241373	-0.00197236	-0.00208426	-0.00241163	-0.002375	-0.00197719	-0.00196379		86233	-0.00198395	-0.00205409	0.0015548	-0.00241366	-0.0019724	-0.00208422	-0.00241166	-0.00237495	-0.00197717	-0.00196371		86233	-0.00198397	-0.00205411	0.0015548	-0.00241367	-0.00197241	-0.00208424	-0.00241166	-0.00237495	-0.00197717	-0.00196373		86233	-0.00198398	-0.00205412	0.0015548	-0.00241367	-0.00197241	-0.00208425	-0.00241165	-0.002375	-0.00197718	-0.00196372
86234	-0.00198395	-0.0020541	0.00155481	-0.00241373	-0.00197236	-0.00208426	-0.00241163	-0.002375	-0.00197719	-0.00196379		86234	-0.00198395	-0.00205409	0.0015548	-0.00241366	-0.0019724	-0.00208422	-0.00241166	-0.00237495	-0.00197717	-0.00196371		86234	-0.00198397	-0.00205411	0.0015548	-0.00241367	-0.00197241	-0.00208424	-0.00241166	-0.00237495	-0.00197717	-0.00196373		86234	-0.00198398	-0.00205412	0.0015548	-0.00241367	-0.00197241	-0.00208425	-0.00241165	-0.002375	-0.00197718	-0.00196372
86235	-0.00198395	-0.0020541	0.00155481	-0.00241373	-0.00197236	-0.00208426	-0.00241163	-0.002375	-0.00197719	-0.00196379		86235	-0.00198395	-0.00205409	0.0015548	-0.00241366	-0.0019724	-0.00208422	-0.00241166	-0.00237495	-0.00197717	-0.00196371		86235	-0.00198397	-0.00205411	0.0015548	-0.00241367	-0.00197241	-0.00208424	-0.00241166	-0.00237495	-0.00197717	-0.00196373		86235	-0.00198398	-0.00205412	0.0015548	-0.00241367	-0.00197241	-0.00208425	-0.00241165	-0.002375	-0.00197718	-0.00196372
86236	-0.00198395	-0.0020541	0.00155481	-0.00241373	-0.00197236	-0.00208426	-0.00241163	-0.002375	-0.00197719	-0.00196379		86236	-0.00198395	-0.00205409	0.0015548	-0.00241366	-0.0019724	-0.00208422	-0.00241166	-0.00237495	-0.00197717	-0.00196371		86236	-0.00198397	-0.00205411	0.0015548	-0.00241367	-0.00197241	-0.00208424	-0.00241166	-0.00237495	-0.00197717	-0.00196373		86236	-0.00198398	-0.00205412	0.0015548	-0.00241367	-0.00197241	-0.00208425	-0.00241165	-0.002375	-0.00197718	-0.00196372
86237	-0.00198395	-0.0020541	0.00155481	-0.00241373	-0.00197236	-0.00208426	-0.00241163	-0.002375	-0.00197719	-0.00196379		86237	-0.00198395	-0.00205409	0.0015548	-0.00241366	-0.0019724	-0.00208422	-0.00241166	-0.00237495	-0.00197717	-0.00196371		86237	-0.00198397	-0.00205411	0.0015548	-0.00241367	-0.00197241	-0.00208424	-0.00241166	-0.00237495	-0.00197717	-0.00196373		86237	-0.00198398	-0.00205412	0.0015548	-0.00241367	-0.00197241	-0.00208425	-0.00241165	-0.002375	-0.00197718	-0.00196372
86238	-0.00198395	-0.0020541	0.00155481	-0.00241373	-0.00197236	-0.00208426	-0.00241163	-0.002375	-0.00197719	-0.00196379		86238	-0.00198395	-0.00205409	0.0015548	-0.00241366	-0.0019724	-0.00208422	-0.00241166	-0.00237495	-0.00197717	-0.00196371		86238	-0.00198397	-0.00205411	0.0015548	-0.00241367	-0.00197241	-0.00208424	-0.00241166	-0.00237495	-0.00197717	-0.00196373		86238	-0.00198398	-0.00205412	0.0015548	-0.00241367	-0.00197241	-0.00208425	-0.00241165	-0.002375	-0.00197718	-0.00196372
86239	-0.00198395	-0.0020541	0.00155481	-0.00241373	-0.00197236	-0.00208426	-0.00241163	-0.002375	-0.00197719	-0.00196379		86239	-0.00198395	-0.00205409	0.0015548	-0.00241366	-0.0019724	-0.00208422	-0.00241166	-0.00237495	-0.00197717	-0.00196371		86239	-0.00198397	-0.00205411	0.0015548	-0.00241367	-0.00197241	-0.00208424	-0.00241166	-0.00237495	-0.00197717	-0.00196373		86239	-0.00198398	-0.00205412	0.0015548	-0.00241367	-0.00197241	-0.00208425	-0.00241165	-0.002375	-0.00197718	-0.00196372
86240	-0.00198395	-0.0020541	0.00155481	-0.00241373	-0.00197236	-0.00208426	-0.00241163	-0.002375	-0.00197719	-0.00196379		86240	-0.00198395	-0.00205409	0.0015548	-0.00241366	-0.0019724	-0.00208422	-0.00241166	-0.00237495	-0.00197717	-0.00196371		86240	-0.00198397	-0.00205411	0.0015548	-0.00241367	-0.00197241	-0.00208424	-0.00241166	-0.00237495	-0.00197717	-0.00196373		86240	-0.00198398	-0.00205412	0.0015548	-0.00241367	-0.00197241	-0.00208425	-0.00241165	-0.002375	-0.00197718	-0.00196372
86241	-0.00198395	-0.0020541	0.00155481	-0.00241373	-0.00197236	-0.00208426	-0.00241163	-0.002375	-0.00197719	-0.00196379		86241	-0.00198395	-0.00205409	0.0015548	-0.00241366	-0.0019724	-0.00208422	-0.00241166	-0.00237495	-0.00197717	-0.00196371		86241	-0.00198397	-0.00205411	0.0015548	-0.00241367	-0.00197241	-0.00208424	-0.00241166	-0.00237495	-0.00197717	-0.00196373		86241	-0.00198398	-0.00205412	0.0015548	-0.00241367	-0.00197241	-0.00208425	-0.00241165	-0.00237499	-0.00197718	-0.00196372
86242	-0.00198395	-0.0020541	0.00155481	-0.00241373	-0.00197236	-0.00208426	-0.00241163	-0.002375	-0.00197719	-0.00196379		86242	-0.00198395	-0.00205409	0.0015548	-0.00241366	-0.0019724	-0.00208422	-0.00241166	-0.00237495	-0.00197717	-0.00196371		86242	-0.00198397	-0.00205411	0.0015548	-0.00241367	-0.00197241	-0.00208424	-0.00241166	-0.00237495	-0.00197717	-0.00196373		86242	-0.00198398	-0.00205412	0.0015548	-0.00241367	-0.00197241	-0.00208425	-0.00241165	-0.00237499	-0.00197718	-0.00196372
86243	-0.00198395	-0.0020541	0.00155481	-0.00241373	-0.00197236	-0.00208426	-0.00241163	-0.002375	-0.00197719	-0.00196379		86243	-0.00198395	-0.00205409	0.0015548	-0.00241366	-0.0019724	-0.00208422	-0.00241166	-0.00237495	-0.00197717	-0.00196371		86243	-0.00198397	-0.00205411	0.0015548	-0.00241367	-0.00197241	-0.00208424	-0.00241166	-0.00237495	-0.00197717	-0.00196373		86243	-0.00198398	-0.00205412	0.0015548	-0.00241367	-0.00197241	-0.00208425	-0.00241165	-0.00237499	-0.00197718	-0.00196372
86244	-0.00198395	-0.0020541	0.00155481	-0.00241373	-0.00197236	-0.00208426	-0.00241163	-0.002375	-0.00197719	-0.00196379		86244	-0.00198395	-0.00205409	0.0015548	-0.00241366	-0.0019724	-0.00208422	-0.00241166	-0.00237495	-0.00197717	-0.00196371		86244	-0.00198397	-0.00205411	0.0015548	-0.00241367	-0.00197241	-0.00208424	-0.00241166	-0.00237495	-0.00197717	-0.00196373		86244	-0.00198398	-0.00205412	0.0015548	-0.00241367	-0.00197241	-0.00208425	-0.00241165	-0.00237499	-0.00197718	-0.00196372
86245	-0.00198395	-0.0020541	0.00155481	-0.00241373	-0.00197236	-0.00208426	-0.00241163	-0.002375	-0.00197719	-0.00196379		86245	-0.00198395	-0.00205409	0.0015548	-0.00241366	-0.0019724	-0.00208422	-0.00241166	-0.00237495	-0.00197717	-0.00196371		86245	-0.00198397	-0.00205411	0.0015548	-0.00241367	-0.00197241	-0.00208424	-0.00241166	-0.00237495	-0.00197717	-0.00196373		86245	-0.00198398	-0.00205412	0.0015548	-0.00241367	-0.00197241	-0.00208425	-0.00241165	-0.00237499	-0.00197718	-0.00196372
86246	-0.00198395	-0.0020541	0.00155481	-0.00241373	-0.00197236	-0.00208426	-0.00241163	-0.002375	-0.00197719	-0.00196379		86246	-0.00198395	-0.00205409	0.0015548	-0.00241366	-0.0019724	-0.00208422	-0.00241166	-0.00237495	-0.00197717	-0.00196371		86246	-0.00198397	-0.00205411	0.0015548	-0.00241367	-0.00197241	-0.00208424	-0.00241166	-0.00237495	-0.00197717	-0.00196373		86246	-0.00198398	-0.00205412	0.0015548	-0.00241367	-0.00197241	-0.00208425	-0.00241165	-0.00237499	-0.00197718	-0.00196372
86247	-0.00198395	-0.0020541	0.00155481	-0.00241373	-0.00197236	-0.00208426	-0.00241163	-0.002375	-0.00197719	-0.00196379		86247	-0.00198395	-0.00205409	0.0015548	-0.00241366	-0.0019724	-0.00208422	-0.00241166	-0.00237495	-0.00197717	-0.00196371		86247	-0.00198397	-0.00205411	0.0015548	-0.00241367	-0.00197241	-0.00208424	-0.00241166	-0.00237495	-0.00197717	-0.00196373		86247	-0.00198398	-0.00205412	0.0015548	-0.00241367	-0.00197241	-0.00208425	-0.00241165	-0.00237499	-0.00197718	-0.00196372
86248	-0.00198395	-0.0020541	0.00155481	-0.00241373	-0.00197236	-0.00208426	-0.00241163	-0.002375	-0.00197719	-0.00196379		86248	-0.00198395	-0.00205409	0.0015548	-0.00241366	-0.0019724	-0.00208422	-0.00241166	-0.00237495	-0.00197717	-0.00196371		86248	-0.00198397	-0.00205411	0.0015548	-0.00241367	-0.00197241	-0.00208424	-0.00241166	-0.00237495	-0.00197717	-0.00196373		86248	-0.00198398	-0.00205412	0.0015548	-0.00241367	-0.00197241	-0.00208425	-0.00241165	-0.00237499	-0.00197718	-0.00196372
86249	-0.00198395	-0.0020541	0.00155481	-0.00241373	-0.00197236	-0.00208426	-0.00241163	-0.002375	-0.00197719	-0.00196379		86249	-0.00198395	-0.00205409	0.0015548	-0.00241366	-0.0019724	-0.00208422	-0.00241166	-0.00237495	-0.00197717	-0.00196371		86249	-0.00198397	-0.00205411	0.0015548	-0.00241367	-0.00197241	-0.00208424	-0.00241166	-0.00237495	-0.00197717	-0.00196373		86249	-0.00198398	-0.00205412	0.0015548	-0.00241367	-0.00197241	-0.00208425	-0.00241165	-0.00237499	-0.00197718	-0.00196372
86250	-0.00198395	-0.0020541	0.00155481	-0.00241373	-0.00197236	-0.00208426	-0.00241163	-0.002375	-0.00197719	-0.00196379		86250	-0.00198395	-0.00205409	0.0015548	-0.00241366	-0.0019724	-0.00208422	-0.00241166	-0.00237495	-0.00197717	-0.00196371		86250	-0.00198397	-0.00205411	0.0015548	-0.00241367	-0.00197241	-0.00208424	-0.00241166	-0.00237495	-0.00197717	-0.00196373		86250	-0.00198398	-0.00205412	0.0015548	-0.00241367	-0.00197241	-0.00208425	-0.00241165	-0.00237499	-0.00197718	-0.00196372
86251	-0.00198395	-0.0020541	0.00155481	-0.00241373	-0.00197236	-0.00208426	-0.00241163	-0.002375	-0.00197719	-0.00196379		86251	-0.00198395	-0.00205409	0.0015548	-0.00241366	-0.0019724	-0.00208422	-0.00241166	-0.00237495	-0.00197717	-0.00196371		86251	-0.00198397	-0.00205411	0.0015548	-0.00241367	-0.00197241	-0.00208424	-0.00241166	-0.00237495	-0.00197717	-0.00196373		86251	-0.00198398	-0.00205412	0.0015548	-0.00241367	-0.00197241	-0.00208425	-0.00241165	-0.00237499	-0.00197718	-0.00196372
86252	-0.00198395	-0.0020541	0.00155481	-0.00241373	-0.00197236	-0.00208426	-0.00241163	-0.002375	-0.00197719	-0.00196379		86252	-0.00198395	-0.00205409	0.0015548	-0.00241366	-0.0019724	-0.00208422	-0.00241166	-0.00237495	-0.00197717	-0.00196371		86252	-0.00198397	-0.00205411	0.0015548	-0.00241367	-0.00197241	-0.00208424	-0.00241166	-0.00237495	-0.00197717	-0.00196373		86252	-0.00198398	-0.00205412	0.0015548	-0.00241367	-0.00197241	-0.00208425	-0.00241165	-0.00237499	-0.00197718	-0.00196372
86253	-0.00198395	-0.0020541	0.00155481	-0.00241373	-0.00197236	-0.00208426	-0.00241163	-0.002375	-0.00197719	-0.00196379		86253	-0.00198395	-0.00205409	0.0015548	-0.00241366	-0.0019724	-0.00208422	-0.00241166	-0.00237495	-0.00197717	-0.00196371		86253	-0.00198397	-0.00205411	0.0015548	-0.00241367	-0.00197241	-0.00208424	-0.00241166	-0.00237495	-0.00197717	-0.00196373		86253	-0.00198398	-0.00205412	0.0015548	-0.00241367	-0.00197241	-0.00208425	-0.00241165	-0.00237499	-0.00197718	-0.00196372
86254	-0.00198395	-0.0020541	0.00155481	-0.00241373	-0.00197236	-0.00208426	-0.00241163	-0.002375	-0.00197719	-0.00196379		86254	-0.00198395	-0.00205409	0.0015548	-0.00241366	-0.0019724	-0.00208422	-0.00241166	-0.00237495	-0.00197717	-0.00196371		86254	-0.00198397	-0.00205411	0.0015548	-0.00241367	-0.00197241	-0.00208424	-0.00241166	-0.00237495	-0.00197717	-0.00196373		86254	-0.00198398	-0.00205412	0.0015548	-0.00241367	-0.00197241	-0.00208425	-0.00241165	-0.00237499	-0.00197718	-0.00196372
86255	-0.00198395	-0.0020541	0.00155481	-0.00241373	-0.00197236	-0.00208426	-0.00241163	-0.002375	-0.00197719	-0.00196379		86255	-0.00198395	-0.00205409	0.0015548	-0.00241366	-0.0019724	-0.00208422	-0.00241166	-0.00237495	-0.00197717	-0.00196371		86255	-0.00198397	-0.00205411	0.0015548	-0.00241367	-0.00197241	-0.00208424	-0.00241166	-0.00237495	-0.00197717	-0.00196373		86255	-0.00198398	-0.00205412	0.0015548	-0.00241367	-0.00197241	-0.00208425	-0.00241165	-0.00237499	-0.00197718	-0.00196372
86256	-0.00198395	-0.0020541	0.00155481	-0.00241373	-0.00197236	-0.00208426	-0.00241163	-0.002375	-0.00197719	-0.00196379		86256	-0.00198395	-0.00205409	0.0015548	-0.00241366	-0.0019724	-0.00208422	-0.00241166	-0.00237495	-0.00197717	-0.00196371		86256	-0.00198397	-0.00205411	0.0015548	-0.00241367	-0.00197241	-0.00208424	-0.00241166	-0.00237495	-0.00197717	-0.00196373		86256	-0.00198398	-0.00205412	0.0015548	-0.00241367	-0.00197241	-0.00208425	-0.00241165	-0.00237499	-0.00197718	-0.00196372
86257	-0.00198395	-0.0020541	0.00155481	-0.00241373	-0.00197236	-0.00208426	-0.00241163	-0.002375	-0.00197719	-0.00196379		86257	-0.00198395	-0.00205409	0.0015548	-0.00241366	-0.0019724	-0.00208422	-0.00241166	-0.00237495	-0.00197717	-0.00196371		86257	-0.00198397	-0.00205411	0.0015548	-0.00241367	-0.00197241	-0.00208424	-0.00241166	-0.00237495	-0.00197717	-0.00196373		86257	-0.00198398	-0.00205412	0.0015548	-0.00241367	-0.00197241	-0.00208425	-0.00241165	-0.00237499	-0.00197718	-0.00196372
86258	-0.00198395	-0.0020541	0.00155481	-0.00241373	-0.00197236	-0.00208426	-0.00241163	-0.002375	-0.00197719	-0.00196379		86258	-0.00198395	-0.00205409	0.0015548	-0.00241366	-0.0019724	-0.00208422	-0.00241166	-0.00237495	-0.00197717	-0.00196371		86258	-0.00198397	-0.00205411	0.0015548	-0.00241367	-0.00197241	-0.00208424	-0.00241166	-0.00237495	-0.00197717	-0.00196373		86258	-0.00198398	-0.00205412	0.0015548	-0.00241367	-0.00197241	-0.00208425	-0.00241165	-0.00237499	-0.00197718	-0.00196372
86259	-0.00198395	-0.0020541	0.00155481	-0.00241373	-0.00197236	-0.00208426	-0.00241163	-0.002375	-0.00197719	-0.00196379		86259	-0.00198395	-0.00205409	0.0015548	-0.00241366	-0.0019724	-0.00208422	-0.00241166	-0.00237495	-0.00197717	-0.00196371		86259	-0.00198397	-0.00205411	0.0015548	-0.00241367	-0.00197241	-0.00208424	-0.00241166	-0.00237495	-0.00197717	-0.00196373		86259	-0.00198398	-0.00205412	0.0015548	-0.00241367	-0.00197241	-0.00208425	-0.00241165	-0.00237499	-0.00197718	-0.00196372
86260	-0.00198395	-0.0020541	0.00155481	-0.00241373	-0.00197236	-0.00208426	-0.00241163	-0.002375	-0.00197719	-0.00196379		86260	-0.00198395	-0.00205409	0.0015548	-0.00241366	-0.0019724	-0.00208422	-0.00241166	-0.00237495	-0.00197717	-0.00196371		86260	-0.00198397	-0.00205411	0.0015548	-0.00241367	-0.00197241	-0.00208424	-0.00241166	-0.00237495	-0.00197717	-0.00196373		86260	-0.00198398	-0.00205412	0.0015548	-0.00241367	-0.00197241	-0.00208425	-0.00241165	-0.00237499	-0.00197718	-0.00196372
86261	-0.00198395	-0.0020541	0.00155481	-0.00241373	-0.00197236	-0.00208426	-0.00241163	-0.002375	-0.00197719	-0.00196379		86261	-0.00198395	-0.00205409	0.0015548	-0.00241366	-0.0019724	-0.00208422	-0.00241166	-0.00237495	-0.00197717	-0.00196371		86261	-0.00198397	-0.00205411	0.0015548	-0.00241367	-0.00197241	-0.00208424	-0.00241166	-0.00237495	-0.00197717	-0.00196373		86261	-0.00198398	-0.00205412	0.0015548	-0.00241367	-0.00197241	-0.00208425	-0.00241165	-0.00237499	-0.00197718	-0.00196372
86262	-0.00198395	-0.0020541	0.00155481	-0.00241373	-0.00197236	-0.00208426	-0.00241163	-0.002375	-0.00197719	-0.00196379		86262	-0.00198395	-0.00205409	0.0015548	-0.00241366	-0.0019724	-0.00208422	-0.00241166	-0.00237495	-0.00197717	-0.00196371		86262	-0.00198397	-0.00205411	0.0015548	-0.00241367	-0.00197241	-0.00208424	-0.00241166	-0.00237495	-0.00197717	-0.00196373		86262	-0.00198398	-0.00205412	0.0015548	-0.00241367	-0.00197241	-0.00208425	-0.00241165	-0.00237499	-0.00197718	-0.00196372
86263	-0.00198395	-0.0020541	0.00155481	-0.00241373	-0.00197236	-0.00208426	-0.00241163	-0.002375	-0.00197719	-0.00196379		86263	-0.00198395	-0.00205409	0.0015548	-0.00241366	-0.0019724	-0.00208422	-0.00241166	-0.00237495	-0.00197717	-0.00196371		86263	-0.00198397	-0.00205411	0.0015548	-0.00241367	-0.00197241	-0.00208424	-0.00241166	-0.00237495	-0.00197717	-0.00196373		86263	-0.00198398	-0.00205412	0.0015548	-0.00241367	-0.00197241	-0.00208425	-0.00241165	-0.00237499	-0.00197718	-0.00196372
86264	-0.00198395	-0.0020541	0.00155481	-0.00241373	-0.00197236	-0.00208426	-0.00241163	-0.002375	-0.00197719	-0.00196379		86264	-0.00198395	-0.00205409	0.0015548	-0.00241366	-0.0019724	-0.00208422	-0.00241166	-0.00237495	-0.00197717	-0.00196371		86264	-0.00198397	-0.00205411	0.0015548	-0.00241367	-0.00197241	-0.00208424	-0.00241166	-0.00237495	-0.00197717	-0.00196373		86264	-0.00198398	-0.00205412	0.0015548	-0.00241367	-0.00197241	-0.00208425	-0.00241165	-0.00237499	-0.00197718	-0.00196372
86265	-0.00198395	-0.0020541	0.00155481	-0.00241373	-0.00197236	-0.00208426	-0.00241163	-0.002375	-0.00197719	-0.00196379		86265	-0.00198395	-0.00205409	0.0015548	-0.00241366	-0.0019724	-0.00208422	-0.00241166	-0.00237495	-0.00197717	-0.00196371		86265	-0.00198397	-0.00205411	0.0015548	-0.00241367	-0.00197241	-0.00208424	-0.00241166	-0.00237495	-0.00197717	-0.00196373		86265	-0.00198398	-0.00205412	0.0015548	-0.00241367	-0.00197241	-0.00208425	-0.00241165	-0.00237499	-0.00197718	-0.00196372
86266	-0.00198395	-0.0020541	0.00155481	-0.00241373	-0.00197236	-0.00208426	-0.00241163	-0.002375	-0.00197719	-0.00196379		86266	-0.00198395	-0.00205409	0.0015548	-0.00241366	-0.0019724	-0.00208422	-0.00241166	-0.00237495	-0.00197717	-0.00196371		86266	-0.00198397	-0.00205411	0.0015548	-0.00241367	-0.00197241	-0.00208424	-0.00241166	-0.00237495	-0.00197717	-0.00196373		86266	-0.00198398	-0.00205412	0.0015548	-0.00241367	-0.00197241	-0.00208425	-0.00241165	-0.00237499	-0.00197718	-0.00196372
86267	-0.00198395	-0.0020541	0.00155481	-0.00241373	-0.00197236	-0.00208426	-0.00241163	-0.002375	-0.00197719	-0.00196379		86267	-0.00198395	-0.00205409	0.0015548	-0.00241366	-0.0019724	-0.00208422	-0.00241166	-0.00237495	-0.00197717	-0.00196371		86267	-0.00198397	-0.00205411	0.0015548	-0.00241367	-0.00197241	-0.00208424	-0.00241166	-0.00237495	-0.00197717	-0.00196373		86267	-0.00198398	-0.00205412	0.0015548	-0.00241367	-0.00197241	-0.00208425	-0.00241165	-0.00237499	-0.00197718	-0.00196372
86268	-0.00198395	-0.0020541	0.00155481	-0.00241373	-0.00197236	-0.00208426	-0.00241163	-0.002375	-0.00197719	-0.00196379		86268	-0.00198395	-0.00205409	0.0015548	-0.00241366	-0.0019724	-0.00208422	-0.00241166	-0.00237495	-0.00197717	-0.00196371		86268	-0.00198397	-0.00205411	0.0015548	-0.00241367	-0.00197241	-0.00208424	-0.00241166	-0.00237495	-0.00197717	-0.00196373		86268	-0.00198398	-0.00205412	0.0015548	-0.00241367	-0.00197241	-0.00208425	-0.00241165	-0.00237499	-0.00197718	-0.00196372
86269	-0.00198395	-0.0020541	0.00155481	-0.00241373	-0.00197236	-0.00208426	-0.00241163	-0.002375	-0.00197719	-0.00196379		86269	-0.00198395	-0.00205409	0.0015548	-0.00241366	-0.0019724	-0.00208422	-0.00241166	-0.00237495	-0.00197717	-0.00196371		86269	-0.00198397	-0.00205411	0.0015548	-0.00241367	-0.00197241	-0.00208424	-0.00241166	-0.00237495	-0.00197717	-0.00196373		86269	-0.00198398	-0.00205412	0.0015548	-0.00241367	-0.00197241	-0.00208425	-0.00241165	-0.00237499	-0.00197718	-0.00196372
86270	-0.00198395	-0.0020541	0.00155481	-0.00241373	-0.00197236	-0.00208426	-0.00241163	-0.002375	-0.00197719	-0.00196379		86270	-0.00198395	-0.00205409	0.0015548	-0.00241366	-0.0019724	-0.00208422	-0.00241166	-0.00237495	-0.00197717	-0.00196371		86270	-0.00198397	-0.00205411	0.0015548	-0.00241367	-0.00197241	-0.00208424	-0.00241166	-0.00237495	-0.00197717	-0.00196373		86270	-0.00198398	-0.00205412	0.0015548	-0.00241367	-0.00197241	-0.00208425	-0.00241165	-0.00237499	-0.00197718	-0.00196372
86271	-0.00198395	-0.0020541	0.00155481	-0.00241373	-0.00197236	-0.00208426	-0.00241163	-0.002375	-0.00197719	-0.00196379		86271	-0.00198395	-0.00205409	0.0015548	-0.00241366	-0.0019724	-0.00208422	-0.00241166	-0.00237495	-0.00197717	-0.00196371		86271	-0.00198397	-0.00205411	0.0015548	-0.00241367	-0.00197241	-0.00208424	-0.00241166	-0.00237495	-0.00197717	-0.00196373		86271	-0.00198398	-0.00205412	0.0015548	-0.00241367	-0.00197241	-0.00208425	-0.00241165	-0.00237499	-0.00197718	-0.00196372
86272	-0.00198395	-0.0020541	0.00155481	-0.00241373	-0.00197236	-0.00208426	-0.00241163	-0.002375	-0.00197719	-0.00196379		86272	-0.00198395	-0.00205409	0.0015548	-0.00241366	-0.0019724	-0.00208422	-0.00241166	-0.00237495	-0.00197717	-0.00196371		86272	-0.00198397	-0.00205411	0.0015548	-0.00241367	-0.00197241	-0.00208424	-0.00241166	-0.00237495	-0.00197717	-0.00196373		86272	-0.00198398	-0.00205412	0.0015548	-0.00241367	-0.00197241	-0.00208425	-0.00241165	-0.00237499	-0.00197718	-0.00196372
86273	-0.00198395	-0.0020541	0.00155481	-0.00241373	-0.00197236	-0.00208426	-0.00241163	-0.002375	-0.00197719	-0.00196379		86273	-0.00198395	-0.00205409	0.0015548	-0.00241366	-0.0019724	-0.00208422	-0.00241166	-0.00237495	-0.00197717	-0.00196371		86273	-0.00198397	-0.00205411	0.0015548	-0.00241367	-0.00197241	-0.00208424	-0.00241166	-0.00237495	-0.00197717	-0.00196373		86273	-0.00198398	-0.00205412	0.0015548	-0.00241367	-0.00197241	-0.00208425	-0.00241165	-0.00237499	-0.00197718	-0.00196372
86274	-0.00198395	-0.0020541	0.00155481	-0.00241373	-0.00197236	-0.00208426	-0.00241163	-0.002375	-0.00197719	-0.00196379		86274	-0.00198395	-0.00205409	0.0015548	-0.00241366	-0.0019724	-0.00208422	-0.00241166	-0.00237495	-0.00197717	-0.00196371		86274	-0.00198397	-0.00205411	0.0015548	-0.00241367	-0.00197241	-0.00208424	-0.00241166	-0.00237495	-0.00197717	-0.00196373		86274	-0.00198398	-0.00205412	0.0015548	-0.00241367	-0.00197241	-0.00208425	-0.00241165	-0.00237499	-0.00197718	-0.00196372
86275	-0.00198395	-0.0020541	0.00155481	-0.00241373	-0.00197236	-0.00208426	-0.00241163	-0.002375	-0.00197719	-0.00196379		86275	-0.00198395	-0.00205409	0.0015548	-0.00241366	-0.0019724	-0.00208422	-0.00241166	-0.00237495	-0.00197717	-0.00196371		86275	-0.00198397	-0.00205411	0.0015548	-0.00241367	-0.00197241	-0.00208424	-0.00241166	-0.00237495	-0.00197717	-0.00196373		86275	-0.00198398	-0.00205412	0.0015548	-0.00241367	-0.00197241	-0.00208425	-0.00241165	-0.00237499	-0.00197718	-0.00196372
86276	-0.00198395	-0.0020541	0.00155481	-0.00241373	-0.00197236	-0.00208426	-0.00241163	-0.002375	-0.00197719	-0.00196379		86276	-0.00198395	-0.00205409	0.0015548	-0.00241366	-0.0019724	-0.00208422	-0.00241166	-0.00237495	-0.00197717	-0.00196371		86276	-0.00198397	-0.00205411	0.0015548	-0.00241367	-0.00197241	-0.00208424	-0.00241166	-0.00237495	-0.00197717	-0.00196373		86276	-0.00198398	-0.00205412	0.0015548	-0.00241367	-0.00197241	-0.00208425	-0.00241165	-0.00237499	-0.00197718	-0.00196372
86277	-0.00198395	-0.0020541	0.00155481	-0.00241373	-0.00197236	-0.00208426	-0.00241163	-0.002375	-0.00197719	-0.00196379		86277	-0.00198395	-0.00205409	0.0015548	-0.00241366	-0.0019724	-0.00208422	-0.00241166	-0.00237495	-0.00197717	-0.00196371		86277	-0.00198397	-0.00205411	0.0015548	-0.00241367	-0.00197241	-0.00208424	-0.00241166	-0.00237495	-0.00197717	-0.00196374		86277	-0.00198398	-0.00205412	0.0015548	-0.00241367	-0.00197241	-0.00208425	-0.00241165	-0.00237499	-0.00197718	-0.00196372
86278	-0.00198395	-0.0020541	0.00155481	-0.00241373	-0.00197236	-0.00208426	-0.00241163	-0.002375	-0.00197719	-0.00196379		86278	-0.00198395	-0.00205409	0.0015548	-0.00241366	-0.0019724	-0.00208422	-0.00241166	-0.00237495	-0.00197717	-0.00196371		86278	-0.00198397	-0.00205411	0.0015548	-0.00241367	-0.00197241	-0.00208424	-0.00241166	-0.00237495	-0.00197717	-0.00196374		86278	-0.00198398	-0.00205412	0.0015548	-0.00241367	-0.00197241	-0.00208425	-0.00241165	-0.00237499	-0.00197718	-0.00196372
86279	-0.00198395	-0.0020541	0.00155481	-0.00241373	-0.00197236	-0.00208426	-0.00241163	-0.002375	-0.00197719	-0.00196379		86279	-0.00198395	-0.00205409	0.0015548	-0.00241366	-0.0019724	-0.00208422	-0.00241166	-0.00237495	-0.00197717	-0.00196371		86279	-0.00198397	-0.00205411	0.0015548	-0.00241367	-0.00197241	-0.00208424	-0.00241166	-0.00237495	-0.00197717	-0.00196374		86279	-0.00198398	-0.00205412	0.0015548	-0.00241367	-0.00197241	-0.00208425	-0.00241165	-0.00237499	-0.00197718	-0.00196372
86280	-0.00198395	-0.0020541	0.00155481	-0.00241373	-0.00197236	-0.00208426	-0.00241163	-0.002375	-0.00197719	-0.00196379		86280	-0.00198395	-0.00205409	0.0015548	-0.00241366	-0.0019724	-0.00208422	-0.00241166	-0.00237495	-0.00197717	-0.00196371		86280	-0.00198397	-0.00205411	0.0015548	-0.00241367	-0.00197241	-0.00208424	-0.00241166	-0.00237495	-0.00197717	-0.00196374		86280	-0.00198398	-0.00205412	0.0015548	-0.00241367	-0.00197241	-0.00208425	-0.00241165	-0.00237499	-0.00197718	-0.00196372
86281	-0.00198395	-0.0020541	0.00155481	-0.00241373	-0.00197236	-0.00208426	-0.00241163	-0.002375	-0.00197719	-0.00196379		86281	-0.00198395	-0.00205409	0.0015548	-0.00241366	-0.0019724	-0.00208422	-0.00241166	-0.00237495	-0.00197717	-0.00196371		86281	-0.00198397	-0.00205411	0.0015548	-0.00241367	-0.00197241	-0.00208424	-0.00241166	-0.00237495	-0.00197717	-0.00196374		86281	-0.00198398	-0.00205412	0.0015548	-0.00241367	-0.00197241	-0.00208425	-0.00241165	-0.00237499	-0.00197718	-0.00196372
86282	-0.00198395	-0.0020541	0.00155481	-0.00241373	-0.00197236	-0.00208426	-0.00241163	-0.002375	-0.00197719	-0.00196379		86282	-0.00198395	-0.00205409	0.0015548	-0.00241366	-0.0019724	-0.00208422	-0.00241166	-0.00237495	-0.00197717	-0.00196371		86282	-0.00198397	-0.00205411	0.0015548	-0.00241367	-0.00197241	-0.00208424	-0.00241166	-0.00237495	-0.00197717	-0.00196374		86282	-0.00198398	-0.00205412	0.0015548	-0.00241367	-0.00197241	-0.00208425	-0.00241165	-0.00237499	-0.00197718	-0.00196372
86283	-0.00198395	-0.0020541	0.00155481	-0.00241373	-0.00197236	-0.00208426	-0.00241163	-0.002375	-0.00197719	-0.00196379		86283	-0.00198395	-0.00205409	0.0015548	-0.00241366	-0.0019724	-0.00208422	-0.00241166	-0.00237495	-0.00197717	-0.00196371		86283	-0.00198397	-0.00205411	0.0015548	-0.00241367	-0.00197241	-0.00208424	-0.00241166	-0.00237495	-0.00197717	-0.00196374		86283	-0.00198398	-0.00205412	0.0015548	-0.00241367	-0.00197241	-0.00208425	-0.00241165	-0.00237499	-0.00197718	-0.00196372
86284	-0.00198395	-0.0020541	0.00155481	-0.00241373	-0.00197236	-0.00208426	-0.00241163	-0.002375	-0.00197719	-0.00196379		86284	-0.00198395	-0.00205409	0.0015548	-0.00241366	-0.0019724	-0.00208422	-0.00241166	-0.00237495	-0.00197717	-0.00196371		86284	-0.00198397	-0.00205411	0.0015548	-0.00241367	-0.00197241	-0.00208424	-0.00241166	-0.00237495	-0.00197717	-0.00196374		86284	-0.00198398	-0.00205412	0.0015548	-0.00241367	-0.00197241	-0.00208425	-0.00241165	-0.00237499	-0.00197718	-0.00196372
86285	-0.00198395	-0.0020541	0.00155481	-0.00241373	-0.00197236	-0.00208426	-0.00241163	-0.002375	-0.00197719	-0.00196379		86285	-0.00198395	-0.00205409	0.0015548	-0.00241366	-0.0019724	-0.00208422	-0.00241166	-0.00237495	-0.00197717	-0.00196371		86285	-0.00198397	-0.00205411	0.0015548	-0.00241367	-0.00197241	-0.00208424	-0.00241166	-0.00237495	-0.00197717	-0.00196374		86285	-0.00198398	-0.00205412	0.0015548	-0.00241367	-0.00197241	-0.00208425	-0.00241165	-0.00237499	-0.00197718	-0.00196372
86286	-0.00198395	-0.0020541	0.00155481	-0.00241373	-0.00197236	-0.00208426	-0.00241163	-0.002375	-0.00197719	-0.00196379		86286	-0.00198395	-0.00205409	0.0015548	-0.00241366	-0.0019724	-0.00208422	-0.00241166	-0.00237495	-0.00197717	-0.00196371		86286	-0.00198397	-0.00205411	0.0015548	-0.00241367	-0.00197241	-0.00208424	-0.00241166	-0.00237495	-0.00197717	-0.00196374		86286	-0.00198398	-0.00205412	0.0015548	-0.00241367	-0.00197241	-0.00208425	-0.00241165	-0.00237499	-0.00197718	-0.00196372
86287	-0.00198395	-0.0020541	0.00155481	-0.00241373	-0.00197236	-0.00208426	-0.00241163	-0.002375	-0.00197719	-0.00196379		86287	-0.00198395	-0.00205409	0.0015548	-0.00241366	-0.0019724	-0.00208422	-0.00241166	-0.00237495	-0.00197717	-0.00196371		86287	-0.00198397	-0.00205411	0.0015548	-0.00241367	-0.00197241	-0.00208424	-0.00241166	-0.00237495	-0.00197717	-0.00196374		86287	-0.00198398	-0.00205412	0.0015548	-0.00241367	-0.00197241	-0.00208425	-0.00241165	-0.00237499	-0.00197718	-0.00196372
86288	-0.00198395	-0.0020541	0.00155481	-0.00241373	-0.00197236	-0.00208426	-0.00241163	-0.002375	-0.00197719	-0.00196379		86288	-0.00198395	-0.00205409	0.0015548	-0.00241366	-0.0019724	-0.00208422	-0.00241166	-0.00237495	-0.00197717	-0.00196371		86288	-0.00198397	-0.00205411	0.0015548	-0.00241367	-0.00197241	-0.00208424	-0.00241166	-0.00237495	-0.00197717	-0.00196374		86288	-0.00198398	-0.00205412	0.0015548	-0.00241367	-0.00197241	-0.00208425	-0.00241165	-0.00237499	-0.00197718	-0.00196372
86289	-0.00198395	-0.0020541	0.00155481	-0.00241373	-0.00197236	-0.00208426	-0.00241163	-0.002375	-0.00197719	-0.00196379		86289	-0.00198395	-0.00205409	0.0015548	-0.00241366	-0.0019724	-0.00208422	-0.00241166	-0.00237495	-0.00197717	-0.00196371		86289	-0.00198397	-0.00205411	0.0015548	-0.00241367	-0.00197241	-0.00208424	-0.00241166	-0.00237495	-0.00197717	-0.00196374		86289	-0.00198398	-0.00205412	0.0015548	-0.00241367	-0.00197241	-0.00208425	-0.00241165	-0.00237499	-0.00197718	-0.00196372
86290	-0.00198395	-0.0020541	0.00155481	-0.00241373	-0.00197236	-0.00208426	-0.00241163	-0.002375	-0.00197719	-0.00196379		86290	-0.00198395	-0.00205409	0.0015548	-0.00241366	-0.0019724	-0.00208422	-0.00241166	-0.00237495	-0.00197717	-0.00196371		86290	-0.00198397	-0.00205411	0.0015548	-0.00241367	-0.00197241	-0.00208424	-0.00241166	-0.00237495	-0.00197717	-0.00196374		86290	-0.00198398	-0.00205412	0.0015548	-0.00241367	-0.00197241	-0.00208425	-0.00241165	-0.00237499	-0.00197718	-0.00196372
86291	-0.00198395	-0.0020541	0.00155481	-0.00241373	-0.00197236	-0.00208426	-0.00241163	-0.002375	-0.00197719	-0.00196379		86291	-0.00198395	-0.00205409	0.0015548	-0.00241366	-0.0019724	-0.00208422	-0.00241166	-0.00237495	-0.00197717	-0.00196371		86291	-0.00198397	-0.00205411	0.0015548	-0.00241367	-0.00197241	-0.00208424	-0.00241166	-0.00237495	-0.00197717	-0.00196374		86291	-0.00198398	-0.00205412	0.0015548	-0.00241367	-0.00197241	-0.00208425	-0.00241165	-0.00237499	-0.00197718	-0.00196372
86292	-0.00198395	-0.0020541	0.00155481	-0.00241373	-0.00197236	-0.00208426	-0.00241163	-0.002375	-0.00197719	-0.00196379		86292	-0.00198395	-0.00205409	0.0015548	-0.00241366	-0.0019724	-0.00208422	-0.00241166	-0.00237495	-0.00197717	-0.00196371		86292	-0.00198397	-0.00205411	0.0015548	-0.00241367	-0.00197241	-0.00208424	-0.00241166	-0.00237495	-0.00197717	-0.00196374		86292	-0.00198398	-0.00205412	0.0015548	-0.00241367	-0.00197241	-0.00208425	-0.00241165	-0.00237499	-0.00197718	-0.00196372
86293	-0.00198395	-0.0020541	0.00155481	-0.00241373	-0.00197236	-0.00208426	-0.00241163	-0.002375	-0.00197719	-0.00196379		86293	-0.00198395	-0.00205409	0.0015548	-0.00241366	-0.0019724	-0.00208422	-0.00241166	-0.00237495	-0.00197717	-0.00196371		86293	-0.00198397	-0.00205411	0.0015548	-0.00241367	-0.00197241	-0.00208424	-0.00241166	-0.00237495	-0.00197717	-0.00196374		86293	-0.00198398	-0.00205412	0.0015548	-0.00241367	-0.00197241	-0.00208425	-0.00241165	-0.00237499	-0.00197718	-0.00196372
86294	-0.00198395	-0.0020541	0.00155481	-0.00241373	-0.00197236	-0.00208426	-0.00241163	-0.002375	-0.00197719	-0.00196379		86294	-0.00198395	-0.00205409	0.0015548	-0.00241366	-0.0019724	-0.00208422	-0.00241166	-0.00237495	-0.00197717	-0.00196371		86294	-0.00198397	-0.00205411	0.0015548	-0.00241367	-0.00197241	-0.00208424	-0.00241166	-0.00237495	-0.00197717	-0.00196374		86294	-0.00198398	-0.00205412	0.0015548	-0.00241367	-0.00197241	-0.00208425	-0.00241165	-0.00237499	-0.00197718	-0.00196372
86295	-0.00198395	-0.0020541	0.00155481	-0.00241373	-0.00197236	-0.00208426	-0.00241163	-0.002375	-0.00197719	-0.00196379		86295	-0.00198395	-0.00205409	0.0015548	-0.00241366	-0.0019724	-0.00208422	-0.00241166	-0.00237495	-0.00197717	-0.00196371		86295	-0.00198397	-0.00205411	0.0015548	-0.00241367	-0.00197241	-0.00208424	-0.00241166	-0.00237495	-0.00197717	-0.00196374		86295	-0.00198398	-0.00205412	0.0015548	-0.00241367	-0.00197241	-0.00208425	-0.00241165	-0.00237499	-0.00197718	-0.00196372
86296	-0.00198395	-0.0020541	0.00155481	-0.00241373	-0.00197236	-0.00208426	-0.00241163	-0.002375	-0.00197719	-0.00196379		86296	-0.00198395	-0.00205409	0.0015548	-0.00241366	-0.0019724	-0.00208422	-0.00241166	-0.00237495	-0.00197717	-0.00196371		86296	-0.00198397	-0.00205411	0.0015548	-0.00241367	-0.00197241	-0.00208424	-0.00241166	-0.00237495	-0.00197717	-0.00196374		86296	-0.00198398	-0.00205412	0.0015548	-0.00241367	-0.00197241	-0.00208425	-0.00241165	-0.00237499	-0.00197718	-0.00196372
86297	-0.00198395	-0.0020541	0.00155481	-0.00241373	-0.00197236	-0.00208426	-0.00241163	-0.002375	-0.00197719	-0.00196379		86297	-0.00198395	-0.00205409	0.0015548	-0.00241366	-0.0019724	-0.00208422	-0.00241166	-0.00237495	-0.00197717	-0.00196371		86297	-0.00198397	-0.00205411	0.0015548	-0.00241367	-0.00197241	-0.00208424	-0.00241166	-0.00237495	-0.00197717	-0.00196374		86297	-0.00198398	-0.00205412	0.0015548	-0.00241367	-0.00197241	-0.00208425	-0.00241165	-0.00237499	-0.00197718	-0.00196372
86298	-0.00198395	-0.0020541	0.00155481	-0.00241373	-0.00197236	-0.00208426	-0.00241163	-0.002375	-0.00197719	-0.00196379		86298	-0.00198395	-0.00205409	0.0015548	-0.00241366	-0.0019724	-0.00208422	-0.00241166	-0.00237495	-0.00197717	-0.00196371		86298	-0.00198397	-0.00205411	0.0015548	-0.00241367	-0.00197241	-0.00208424	-0.00241166	-0.00237495	-0.00197717	-0.00196374		86298	-0.00198398	-0.00205412	0.0015548	-0.00241367	-0.00197241	-0.00208425	-0.00241165	-0.00237499	-0.00197718	-0.00196372
86299	-0.00198395	-0.0020541	0.00155481	-0.00241373	-0.00197236	-0.00208426	-0.00241163	-0.002375	-0.00197719	-0.00196379		86299	-0.00198395	-0.00205409	0.0015548	-0.00241366	-0.0019724	-0.00208422	-0.00241166	-0.00237495	-0.00197717	-0.00196371		86299	-0.00198397	-0.00205411	0.0015548	-0.00241367	-0.00197241	-0.00208424	-0.00241166	-0.00237495	-0.00197717	-0.00196374		86299	-0.00198398	-0.00205412	0.0015548	-0.00241367	-0.00197241	-0.00208425	-0.00241165	-0.00237499	-0.00197718	-0.00196372
86300	-0.00198395	-0.0020541	0.00155481	-0.00241373	-0.00197236	-0.00208426	-0.00241163	-0.002375	-0.00197719	-0.00196379		86300	-0.00198395	-0.00205409	0.0015548	-0.00241366	-0.0019724	-0.00208422	-0.00241166	-0.00237495	-0.00197717	-0.00196371		86300	-0.00198397	-0.00205411	0.0015548	-0.00241367	-0.00197241	-0.00208424	-0.00241166	-0.00237495	-0.00197717	-0.00196374		86300	-0.00198398	-0.00205412	0.0015548	-0.00241367	-0.00197241	-0.00208425	-0.00241165	-0.00237499	-0.00197718	-0.00196372
86301	-0.00198395	-0.0020541	0.00155481	-0.00241373	-0.00197236	-0.00208426	-0.00241163	-0.002375	-0.00197719	-0.00196379		86301	-0.00198395	-0.00205409	0.0015548	-0.00241366	-0.0019724	-0.00208422	-0.00241166	-0.00237495	-0.00197717	-0.00196371		86301	-0.00198397	-0.00205411	0.0015548	-0.00241367	-0.00197241	-0.00208424	-0.00241166	-0.00237495	-0.00197717	-0.00196374		86301	-0.00198398	-0.00205412	0.0015548	-0.00241367	-0.00197241	-0.00208425	-0.00241165	-0.00237499	-0.00197718	-0.00196372
86302	-0.00198395	-0.0020541	0.00155481	-0.00241373	-0.00197236	-0.00208426	-0.00241163	-0.002375	-0.00197719	-0.00196379		86302	-0.00198395	-0.00205409	0.0015548	-0.00241366	-0.0019724	-0.00208422	-0.00241166	-0.00237495	-0.00197717	-0.00196371		86302	-0.00198397	-0.00205411	0.0015548	-0.00241367	-0.00197241	-0.00208424	-0.00241166	-0.00237495	-0.00197717	-0.00196374		86302	-0.00198398	-0.00205412	0.0015548	-0.00241367	-0.00197241	-0.00208425	-0.00241165	-0.00237499	-0.00197718	-0.00196372
86303	-0.00198395	-0.0020541	0.00155481	-0.00241373	-0.00197236	-0.00208426	-0.00241163	-0.002375	-0.00197719	-0.00196379		86303	-0.00198395	-0.00205409	0.0015548	-0.00241366	-0.0019724	-0.00208422	-0.00241166	-0.00237495	-0.00197717	-0.00196371		86303	-0.00198397	-0.00205411	0.0015548	-0.00241367	-0.00197241	-0.00208424	-0.00241166	-0.00237495	-0.00197717	-0.00196374		86303	-0.00198398	-0.00205412	0.0015548	-0.00241367	-0.00197241	-0.00208425	-0.00241165	-0.00237499	-0.00197718	-0.00196372
86304	-0.00198395	-0.0020541	0.00155481	-0.00241373	-0.00197236	-0.00208426	-0.00241163	-0.002375	-0.00197719	-0.00196379		86304	-0.00198395	-0.00205409	0.0015548	-0.00241366	-0.0019724	-0.00208422	-0.00241166	-0.00237495	-0.00197717	-0.00196371		86304	-0.00198397	-0.00205411	0.0015548	-0.00241367	-0.00197241	-0.00208424	-0.00241166	-0.00237495	-0.00197717	-0.00196374		86304	-0.00198398	-0.00205412	0.0015548	-0.00241367	-0.00197241	-0.00208425	-0.00241165	-0.00237499	-0.00197718	-0.00196372
86305	-0.00198395	-0.0020541	0.00155481	-0.00241373	-0.00197236	-0.00208426	-0.00241163	-0.002375	-0.00197719	-0.00196379		86305	-0.00198395	-0.00205409	0.0015548	-0.00241366	-0.0019724	-0.00208422	-0.00241166	-0.00237495	-0.00197717	-0.00196371		86305	-0.00198397	-0.00205411	0.0015548	-0.00241367	-0.00197241	-0.00208424	-0.00241166	-0.00237495	-0.00197717	-0.00196374		86305	-0.00198398	-0.00205412	0.0015548	-0.00241367	-0.00197241	-0.00208425	-0.00241165	-0.00237499	-0.00197718	-0.00196372
86306	-0.00198395	-0.0020541	0.00155481	-0.00241373	-0.00197236	-0.00208426	-0.00241163	-0.002375	-0.00197719	-0.00196379		86306	-0.00198395	-0.00205409	0.0015548	-0.00241366	-0.0019724	-0.00208422	-0.00241166	-0.00237495	-0.00197717	-0.00196371		86306	-0.00198397	-0.00205411	0.0015548	-0.00241367	-0.00197241	-0.00208424	-0.00241166	-0.00237495	-0.00197717	-0.00196374		86306	-0.00198398	-0.00205412	0.0015548	-0.00241367	-0.00197241	-0.00208425	-0.00241165	-0.00237499	-0.00197718	-0.00196372
86307	-0.00198395	-0.0020541	0.00155481	-0.00241373	-0.00197236	-0.00208426	-0.00241163	-0.002375	-0.00197719	-0.00196379		86307	-0.00198395	-0.00205409	0.0015548	-0.00241366	-0.0019724	-0.00208422	-0.00241166	-0.00237495	-0.00197717	-0.00196371		86307	-0.00198397	-0.00205411	0.0015548	-0.00241367	-0.00197241	-0.00208424	-0.00241166	-0.00237495	-0.00197717	-0.00196374		86307	-0.00198398	-0.00205412	0.0015548	-0.00241367	-0.00197241	-0.00208425	-0.00241165	-0.00237499	-0.00197718	-0.00196372
86308	-0.00198395	-0.0020541	0.00155481	-0.00241373	-0.00197236	-0.00208426	-0.00241163	-0.002375	-0.00197719	-0.00196379		86308	-0.00198395	-0.00205409	0.0015548	-0.00241366	-0.0019724	-0.00208422	-0.00241166	-0.00237495	-0.00197717	-0.00196371		86308	-0.00198397	-0.00205411	0.0015548	-0.00241367	-0.00197241	-0.00208424	-0.00241166	-0.00237495	-0.00197717	-0.00196374		86308	-0.00198398	-0.00205412	0.0015548	-0.00241367	-0.00197241	-0.00208425	-0.00241165	-0.00237499	-0.00197718	-0.00196372
86309	-0.00198395	-0.0020541	0.00155481	-0.00241373	-0.00197236	-0.00208426	-0.00241163	-0.002375	-0.00197719	-0.00196379		86309	-0.00198395	-0.00205409	0.0015548	-0.00241366	-0.0019724	-0.00208422	-0.00241166	-0.00237495	-0.00197717	-0.00196371		86309	-0.00198397	-0.00205411	0.0015548	-0.00241367	-0.00197241	-0.00208424	-0.00241166	-0.00237495	-0.00197717	-0.00196374		86309	-0.00198398	-0.00205412	0.0015548	-0.00241367	-0.00197241	-0.00208425	-0.00241165	-0.00237499	-0.00197718	-0.00196372
86310	-0.00198395	-0.0020541	0.00155481	-0.00241373	-0.00197236	-0.00208426	-0.00241163	-0.002375	-0.00197719	-0.00196379		86310	-0.00198395	-0.00205409	0.0015548	-0.00241366	-0.0019724	-0.00208422	-0.00241166	-0.00237495	-0.00197717	-0.00196371		86310	-0.00198397	-0.00205411	0.0015548	-0.00241367	-0.00197241	-0.00208424	-0.00241166	-0.00237495	-0.00197717	-0.00196374		86310	-0.00198398	-0.00205412	0.0015548	-0.00241367	-0.00197241	-0.00208425	-0.00241165	-0.00237499	-0.00197718	-0.00196372
86311	-0.00198395	-0.0020541	0.00155481	-0.00241373	-0.00197236	-0.00208426	-0.00241163	-0.002375	-0.00197719	-0.00196379		86311	-0.00198395	-0.00205409	0.0015548	-0.00241366	-0.0019724	-0.00208422	-0.00241166	-0.00237495	-0.00197717	-0.00196371		86311	-0.00198397	-0.00205411	0.0015548	-0.00241367	-0.00197241	-0.00208424	-0.00241166	-0.00237495	-0.00197717	-0.00196374		86311	-0.00198398	-0.00205412	0.0015548	-0.00241367	-0.00197241	-0.00208425	-0.00241165	-0.00237499	-0.00197718	-0.00196372
86312	-0.00198395	-0.0020541	0.00155481	-0.00241373	-0.00197236	-0.00208426	-0.00241163	-0.002375	-0.00197719	-0.00196379		86312	-0.00198395	-0.00205409	0.0015548	-0.00241366	-0.0019724	-0.00208422	-0.00241166	-0.00237495	-0.00197717	-0.00196371		86312	-0.00198397	-0.00205411	0.0015548	-0.00241367	-0.00197241	-0.00208424	-0.00241166	-0.00237495	-0.00197717	-0.00196374		86312	-0.00198398	-0.00205412	0.0015548	-0.00241367	-0.00197241	-0.00208425	-0.00241165	-0.00237499	-0.00197718	-0.00196372
86313	-0.00198395	-0.0020541	0.00155481	-0.00241373	-0.00197236	-0.00208426	-0.00241163	-0.002375	-0.00197719	-0.00196379		86313	-0.00198395	-0.00205409	0.0015548	-0.00241366	-0.0019724	-0.00208422	-0.00241166	-0.00237495	-0.00197717	-0.00196371		86313	-0.00198397	-0.00205411	0.0015548	-0.00241367	-0.00197241	-0.00208424	-0.00241166	-0.00237495	-0.00197717	-0.00196374		86313	-0.00198398	-0.00205412	0.0015548	-0.00241367	-0.00197241	-0.00208425	-0.00241165	-0.00237499	-0.00197718	-0.00196372
86314	-0.00198395	-0.0020541	0.00155481	-0.00241373	-0.00197236	-0.00208426	-0.00241163	-0.002375	-0.00197719	-0.00196379		86314	-0.00198395	-0.00205409	0.0015548	-0.00241366	-0.0019724	-0.00208422	-0.00241166	-0.00237495	-0.00197717	-0.00196371		86314	-0.00198397	-0.00205411	0.0015548	-0.00241367	-0.00197241	-0.00208424	-0.00241166	-0.00237495	-0.00197717	-0.00196374		86314	-0.00198398	-0.00205412	0.0015548	-0.00241367	-0.00197241	-0.00208425	-0.00241165	-0.00237499	-0.00197718	-0.00196372
86315	-0.00198395	-0.0020541	0.00155481	-0.00241373	-0.00197236	-0.00208426	-0.00241163	-0.002375	-0.00197719	-0.00196379		86315	-0.00198395	-0.00205409	0.0015548	-0.00241366	-0.0019724	-0.00208422	-0.00241166	-0.00237495	-0.00197717	-0.00196371		86315	-0.00198397	-0.00205411	0.0015548	-0.00241367	-0.00197241	-0.00208424	-0.00241166	-0.00237495	-0.00197717	-0.00196374		86315	-0.00198398	-0.00205412	0.0015548	-0.00241367	-0.00197241	-0.00208425	-0.00241165	-0.00237499	-0.00197718	-0.00196372
86316	-0.00198395	-0.0020541	0.00155481	-0.00241373	-0.00197236	-0.00208426	-0.00241163	-0.002375	-0.00197719	-0.00196379		86316	-0.00198395	-0.00205409	0.0015548	-0.00241366	-0.0019724	-0.00208422	-0.00241166	-0.00237495	-0.00197717	-0.00196371		86316	-0.00198397	-0.00205411	0.0015548	-0.00241367	-0.00197241	-0.00208424	-0.00241166	-0.00237495	-0.00197717	-0.00196374		86316	-0.00198398	-0.00205412	0.0015548	-0.00241367	-0.00197241	-0.00208425	-0.00241165	-0.00237499	-0.00197718	-0.00196372
86317	-0.00198395	-0.0020541	0.00155481	-0.00241373	-0.00197236	-0.00208426	-0.00241163	-0.002375	-0.00197719	-0.00196379		86317	-0.00198395	-0.00205409	0.0015548	-0.00241366	-0.0019724	-0.00208422	-0.00241166	-0.00237495	-0.00197717	-0.00196371		86317	-0.00198397	-0.00205411	0.0015548	-0.00241367	-0.00197241	-0.00208424	-0.00241166	-0.00237495	-0.00197717	-0.00196374		86317	-0.00198398	-0.00205412	0.0015548	-0.00241367	-0.00197241	-0.00208425	-0.00241165	-0.00237499	-0.00197718	-0.00196372
86318	-0.00198395	-0.0020541	0.00155481	-0.00241373	-0.00197236	-0.00208426	-0.00241163	-0.002375	-0.00197719	-0.00196379		86318	-0.00198395	-0.00205409	0.0015548	-0.00241366	-0.0019724	-0.00208422	-0.00241166	-0.00237495	-0.00197717	-0.00196371		86318	-0.00198397	-0.00205411	0.0015548	-0.00241367	-0.00197241	-0.00208424	-0.00241166	-0.00237495	-0.00197717	-0.00196374		86318	-0.00198398	-0.00205412	0.0015548	-0.00241367	-0.00197241	-0.00208425	-0.00241165	-0.00237499	-0.00197718	-0.00196372
86319	-0.00198395	-0.0020541	0.00155481	-0.00241373	-0.00197236	-0.00208426	-0.00241163	-0.002375	-0.00197719	-0.00196379		86319	-0.00198395	-0.00205409	0.0015548	-0.00241366	-0.0019724	-0.00208422	-0.00241166	-0.00237495	-0.00197717	-0.00196371		86319	-0.00198397	-0.00205411	0.0015548	-0.00241367	-0.00197241	-0.00208424	-0.00241166	-0.00237495	-0.00197717	-0.00196374		86319	-0.00198398	-0.00205412	0.0015548	-0.00241367	-0.00197241	-0.00208425	-0.00241165	-0.00237499	-0.00197718	-0.00196372
86320	-0.00198395	-0.0020541	0.00155481	-0.00241373	-0.00197236	-0.00208426	-0.00241163	-0.002375	-0.00197719	-0.00196379		86320	-0.00198395	-0.00205409	0.0015548	-0.00241366	-0.0019724	-0.00208422	-0.00241166	-0.00237495	-0.00197717	-0.00196371		86320	-0.00198397	-0.00205411	0.0015548	-0.00241367	-0.00197241	-0.00208424	-0.00241166	-0.00237495	-0.00197717	-0.00196374		86320	-0.00198398	-0.00205412	0.0015548	-0.00241367	-0.00197241	-0.00208425	-0.00241165	-0.00237499	-0.00197718	-0.00196372
86321	-0.00198395	-0.0020541	0.00155481	-0.00241373	-0.00197236	-0.00208426	-0.00241163	-0.002375	-0.00197719	-0.00196379		86321	-0.00198395	-0.00205409	0.0015548	-0.00241366	-0.0019724	-0.00208422	-0.00241166	-0.00237495	-0.00197717	-0.00196371		86321	-0.00198397	-0.00205411	0.0015548	-0.00241367	-0.00197241	-0.00208424	-0.00241166	-0.00237495	-0.00197717	-0.00196374		86321	-0.00198398	-0.00205412	0.0015548	-0.00241367	-0.00197241	-0.00208425	-0.00241165	-0.00237499	-0.00197718	-0.00196372
86322	-0.00198395	-0.0020541	0.00155481	-0.00241373	-0.00197236	-0.00208426	-0.00241163	-0.002375	-0.00197719	-0.00196379		86322	-0.00198395	-0.00205409	0.0015548	-0.00241366	-0.0019724	-0.00208422	-0.00241166	-0.00237495	-0.00197717	-0.00196371		86322	-0.00198397	-0.00205411	0.0015548	-0.00241367	-0.00197241	-0.00208424	-0.00241166	-0.00237495	-0.00197717	-0.00196374		86322	-0.00198398	-0.00205412	0.0015548	-0.00241367	-0.00197241	-0.00208425	-0.00241165	-0.00237499	-0.00197718	-0.00196372
86323	-0.00198395	-0.0020541	0.00155481	-0.00241373	-0.00197236	-0.00208426	-0.00241163	-0.002375	-0.00197719	-0.00196379		86323	-0.00198395	-0.00205409	0.0015548	-0.00241366	-0.0019724	-0.00208422	-0.00241166	-0.00237495	-0.00197717	-0.00196371		86323	-0.00198397	-0.00205411	0.0015548	-0.00241367	-0.00197241	-0.00208424	-0.00241166	-0.00237495	-0.00197717	-0.00196374		86323	-0.00198398	-0.00205412	0.0015548	-0.00241367	-0.00197241	-0.00208425	-0.00241165	-0.00237499	-0.00197718	-0.00196372
86324	-0.00198395	-0.0020541	0.00155481	-0.00241373	-0.00197236	-0.00208426	-0.00241163	-0.002375	-0.00197719	-0.00196379		86324	-0.00198395	-0.00205409	0.0015548	-0.00241366	-0.0019724	-0.00208422	-0.00241166	-0.00237495	-0.00197717	-0.00196371		86324	-0.00198397	-0.00205411	0.0015548	-0.00241367	-0.00197241	-0.00208424	-0.00241166	-0.00237495	-0.00197717	-0.00196374		86324	-0.00198398	-0.00205412	0.0015548	-0.00241367	-0.00197241	-0.00208425	-0.00241165	-0.00237499	-0.00197718	-0.00196372
86325	-0.00198395	-0.0020541	0.00155481	-0.00241373	-0.00197236	-0.00208426	-0.00241163	-0.002375	-0.00197719	-0.00196379		86325	-0.00198395	-0.00205409	0.0015548	-0.00241366	-0.0019724	-0.00208422	-0.00241166	-0.00237495	-0.00197717	-0.00196371		86325	-0.00198397	-0.00205411	0.0015548	-0.00241367	-0.00197241	-0.00208424	-0.00241166	-0.00237495	-0.00197717	-0.00196374		86325	-0.00198398	-0.00205412	0.0015548	-0.00241367	-0.00197241	-0.00208425	-0.00241165	-0.00237499	-0.00197718	-0.00196372
86326	-0.00198395	-0.0020541	0.00155481	-0.00241373	-0.00197236	-0.00208426	-0.00241163	-0.002375	-0.00197719	-0.00196379		86326	-0.00198395	-0.00205409	0.0015548	-0.00241366	-0.0019724	-0.00208422	-0.00241166	-0.00237495	-0.00197717	-0.00196371		86326	-0.00198397	-0.00205411	0.0015548	-0.00241367	-0.00197241	-0.00208424	-0.00241166	-0.00237495	-0.00197717	-0.00196374		86326	-0.00198398	-0.00205412	0.0015548	-0.00241367	-0.00197241	-0.00208425	-0.00241165	-0.00237499	-0.00197718	-0.00196372
86327	-0.00198395	-0.0020541	0.00155481	-0.00241373	-0.00197236	-0.00208426	-0.00241163	-0.002375	-0.00197719	-0.00196379		86327	-0.00198395	-0.00205409	0.0015548	-0.00241366	-0.0019724	-0.00208422	-0.00241166	-0.00237495	-0.00197717	-0.00196371		86327	-0.00198397	-0.00205411	0.0015548	-0.00241367	-0.00197241	-0.00208424	-0.00241166	-0.00237495	-0.00197717	-0.00196374		86327	-0.00198398	-0.00205412	0.0015548	-0.00241367	-0.00197241	-0.00208425	-0.00241165	-0.00237499	-0.00197718	-0.00196372
86328	-0.00198395	-0.0020541	0.00155481	-0.00241373	-0.00197236	-0.00208426	-0.00241163	-0.002375	-0.00197719	-0.00196379		86328	-0.00198395	-0.00205409	0.0015548	-0.00241366	-0.0019724	-0.00208422	-0.00241166	-0.00237495	-0.00197717	-0.00196371		86328	-0.00198397	-0.00205411	0.0015548	-0.00241367	-0.00197241	-0.00208424	-0.00241166	-0.00237495	-0.00197717	-0.00196374		86328	-0.00198398	-0.00205412	0.0015548	-0.00241367	-0.00197241	-0.00208425	-0.00241165	-0.00237499	-0.00197718	-0.00196372
86329	-0.00198395	-0.0020541	0.00155481	-0.00241373	-0.00197236	-0.00208426	-0.00241163	-0.002375	-0.00197719	-0.00196379		86329	-0.00198395	-0.00205409	0.0015548	-0.00241366	-0.0019724	-0.00208422	-0.00241166	-0.00237495	-0.00197717	-0.00196371		86329	-0.00198397	-0.00205411	0.0015548	-0.00241367	-0.00197241	-0.00208424	-0.00241166	-0.00237495	-0.00197717	-0.00196374		86329	-0.00198398	-0.00205412	0.0015548	-0.00241367	-0.00197241	-0.00208425	-0.00241165	-0.00237499	-0.00197718	-0.00196372
86330	-0.00198395	-0.0020541	0.00155481	-0.00241373	-0.00197236	-0.00208426	-0.00241163	-0.002375	-0.00197719	-0.00196379		86330	-0.00198395	-0.00205409	0.0015548	-0.00241366	-0.0019724	-0.00208422	-0.00241166	-0.00237495	-0.00197717	-0.00196371		86330	-0.00198397	-0.00205411	0.0015548	-0.00241367	-0.00197241	-0.00208424	-0.00241166	-0.00237495	-0.00197717	-0.00196374		86330	-0.00198398	-0.00205412	0.0015548	-0.00241367	-0.00197241	-0.00208425	-0.00241165	-0.00237499	-0.00197718	-0.00196372
86331	-0.00198395	-0.0020541	0.00155481	-0.00241373	-0.00197236	-0.00208426	-0.00241163	-0.002375	-0.00197719	-0.00196379		86331	-0.00198395	-0.00205409	0.0015548	-0.00241366	-0.0019724	-0.00208422	-0.00241166	-0.00237495	-0.00197717	-0.00196371		86331	-0.00198397	-0.00205411	0.0015548	-0.00241367	-0.00197241	-0.00208424	-0.00241166	-0.00237495	-0.00197717	-0.00196374		86331	-0.00198398	-0.00205412	0.0015548	-0.00241367	-0.00197241	-0.00208425	-0.00241165	-0.00237499	-0.00197718	-0.00196372
86332	-0.00198395	-0.0020541	0.00155481	-0.00241373	-0.00197236	-0.00208426	-0.00241163	-0.002375	-0.00197719	-0.00196379		86332	-0.00198395	-0.00205409	0.0015548	-0.00241366	-0.0019724	-0.00208422	-0.00241166	-0.00237495	-0.00197717	-0.00196371		86332	-0.00198397	-0.00205411	0.0015548	-0.00241367	-0.00197241	-0.00208424	-0.00241166	-0.00237495	-0.00197717	-0.00196374		86332	-0.00198398	-0.00205412	0.0015548	-0.00241367	-0.00197241	-0.00208425	-0.00241165	-0.00237499	-0.00197718	-0.00196372
86333	-0.00198395	-0.0020541	0.00155481	-0.00241373	-0.00197236	-0.00208426	-0.00241163	-0.002375	-0.00197719	-0.00196379		86333	-0.00198395	-0.00205409	0.0015548	-0.00241366	-0.0019724	-0.00208422	-0.00241166	-0.00237495	-0.00197717	-0.00196371		86333	-0.00198397	-0.00205411	0.0015548	-0.00241367	-0.00197241	-0.00208424	-0.00241166	-0.00237495	-0.00197717	-0.00196374		86333	-0.00198398	-0.00205412	0.0015548	-0.00241367	-0.00197241	-0.00208425	-0.00241165	-0.00237499	-0.00197718	-0.00196372
86334	-0.00198395	-0.0020541	0.00155481	-0.00241373	-0.00197236	-0.00208426	-0.00241163	-0.002375	-0.00197719	-0.00196379		86334	-0.00198395	-0.00205409	0.0015548	-0.00241366	-0.0019724	-0.00208422	-0.00241166	-0.00237495	-0.00197717	-0.00196371		86334	-0.00198397	-0.00205411	0.0015548	-0.00241367	-0.00197241	-0.00208424	-0.00241166	-0.00237495	-0.00197717	-0.00196374		86334	-0.00198398	-0.00205412	0.0015548	-0.00241367	-0.00197241	-0.00208425	-0.00241165	-0.00237499	-0.00197718	-0.00196372
86335	-0.00198395	-0.0020541	0.00155481	-0.00241373	-0.00197236	-0.00208426	-0.00241163	-0.002375	-0.00197719	-0.00196379		86335	-0.00198395	-0.00205409	0.0015548	-0.00241366	-0.0019724	-0.00208422	-0.00241166	-0.00237495	-0.00197717	-0.00196371		86335	-0.00198397	-0.00205411	0.0015548	-0.00241367	-0.00197241	-0.00208424	-0.00241166	-0.00237495	-0.00197717	-0.00196374		86335	-0.00198398	-0.00205412	0.0015548	-0.00241367	-0.00197241	-0.00208425	-0.00241165	-0.00237499	-0.00197718	-0.00196372
86336	-0.00198395	-0.0020541	0.00155481	-0.00241373	-0.00197236	-0.00208426	-0.00241163	-0.002375	-0.00197719	-0.00196379		86336	-0.00198395	-0.00205409	0.0015548	-0.00241366	-0.0019724	-0.00208422	-0.00241166	-0.00237495	-0.00197717	-0.00196371		86336	-0.00198397	-0.00205411	0.0015548	-0.00241367	-0.00197241	-0.00208424	-0.00241166	-0.00237495	-0.00197717	-0.00196374		86336	-0.00198398	-0.00205412	0.0015548	-0.00241367	-0.00197241	-0.00208425	-0.00241165	-0.00237499	-0.00197718	-0.00196372
86337	-0.00198395	-0.0020541	0.00155481	-0.00241373	-0.00197236	-0.00208426	-0.00241163	-0.002375	-0.00197719	-0.00196379		86337	-0.00198395	-0.00205409	0.0015548	-0.00241366	-0.0019724	-0.00208422	-0.00241166	-0.00237495	-0.00197717	-0.00196371		86337	-0.00198397	-0.00205411	0.0015548	-0.00241367	-0.00197241	-0.00208424	-0.00241166	-0.00237495	-0.00197717	-0.00196374		86337	-0.00198398	-0.00205412	0.0015548	-0.00241367	-0.00197241	-0.00208425	-0.00241165	-0.00237499	-0.00197718	-0.00196372
86338	-0.00198395	-0.0020541	0.00155481	-0.00241373	-0.00197236	-0.00208426	-0.00241163	-0.002375	-0.00197719	-0.00196379		86338	-0.00198395	-0.00205409	0.0015548	-0.00241366	-0.0019724	-0.00208422	-0.00241166	-0.00237495	-0.00197717	-0.00196371		86338	-0.00198397	-0.00205411	0.0015548	-0.00241367	-0.00197241	-0.00208424	-0.00241166	-0.00237495	-0.00197717	-0.00196374		86338	-0.00198398	-0.00205412	0.0015548	-0.00241367	-0.00197241	-0.00208425	-0.00241165	-0.00237499	-0.00197718	-0.00196372
86339	-0.00198395	-0.0020541	0.00155481	-0.00241373	-0.00197236	-0.00208426	-0.00241163	-0.002375	-0.00197719	-0.00196379		86339	-0.00198395	-0.00205409	0.0015548	-0.00241366	-0.0019724	-0.00208422	-0.00241166	-0.00237495	-0.00197717	-0.00196371		86339	-0.00198397	-0.00205411	0.0015548	-0.00241367	-0.00197241	-0.00208424	-0.00241166	-0.00237495	-0.00197717	-0.00196374		86339	-0.00198398	-0.00205412	0.0015548	-0.00241367	-0.00197241	-0.00208425	-0.00241165	-0.00237499	-0.00197718	-0.00196372
86340	-0.00198395	-0.0020541	0.00155481	-0.00241373	-0.00197236	-0.00208426	-0.00241163	-0.002375	-0.00197719	-0.00196379		86340	-0.00198395	-0.00205409	0.0015548	-0.00241366	-0.0019724	-0.00208422	-0.00241166	-0.00237495	-0.00197717	-0.00196371		86340	-0.00198397	-0.00205411	0.0015548	-0.00241367	-0.00197241	-0.00208424	-0.00241166	-0.00237495	-0.00197717	-0.00196374		86340	-0.00198398	-0.00205412	0.0015548	-0.00241367	-0.00197241	-0.00208425	-0.00241165	-0.00237499	-0.00197718	-0.00196372
86341	-0.00198395	-0.0020541	0.00155481	-0.00241373	-0.00197236	-0.00208426	-0.00241163	-0.002375	-0.00197719	-0.00196379		86341	-0.00198395	-0.00205409	0.0015548	-0.00241366	-0.0019724	-0.00208422	-0.00241166	-0.00237495	-0.00197717	-0.00196371		86341	-0.00198397	-0.00205411	0.0015548	-0.00241367	-0.00197241	-0.00208424	-0.00241166	-0.00237495	-0.00197717	-0.00196374		86341	-0.00198398	-0.00205412	0.0015548	-0.00241367	-0.00197241	-0.00208425	-0.00241165	-0.00237499	-0.00197718	-0.00196372
86342	-0.00198395	-0.0020541	0.00155481	-0.00241373	-0.00197236	-0.00208426	-0.00241163	-0.002375	-0.00197719	-0.00196379		86342	-0.00198395	-0.00205409	0.0015548	-0.00241366	-0.0019724	-0.00208422	-0.00241166	-0.00237495	-0.00197717	-0.00196371		86342	-0.00198397	-0.00205411	0.0015548	-0.00241367	-0.00197241	-0.00208424	-0.00241166	-0.00237495	-0.00197717	-0.00196374		86342	-0.00198398	-0.00205412	0.0015548	-0.00241367	-0.00197241	-0.00208425	-0.00241165	-0.00237499	-0.00197718	-0.00196372
86343	-0.00198395	-0.0020541	0.00155481	-0.00241373	-0.00197236	-0.00208426	-0.00241163	-0.002375	-0.00197719	-0.00196379		86343	-0.00198395	-0.00205409	0.0015548	-0.00241366	-0.0019724	-0.00208422	-0.00241166	-0.00237495	-0.00197717	-0.00196371		86343	-0.00198397	-0.00205411	0.0015548	-0.00241367	-0.00197241	-0.00208424	-0.00241166	-0.00237495	-0.00197717	-0.00196374		86343	-0.00198398	-0.00205412	0.0015548	-0.00241367	-0.00197241	-0.00208425	-0.00241165	-0.00237499	-0.00197718	-0.00196372
86344	-0.00198395	-0.0020541	0.00155481	-0.00241373	-0.00197236	-0.00208426	-0.00241163	-0.002375	-0.00197719	-0.00196379		86344	-0.00198395	-0.00205409	0.0015548	-0.00241366	-0.0019724	-0.00208422	-0.00241166	-0.00237495	-0.00197717	-0.00196371		86344	-0.00198397	-0.00205411	0.0015548	-0.00241367	-0.00197241	-0.00208424	-0.00241166	-0.00237495	-0.00197717	-0.00196374		86344	-0.00198398	-0.00205412	0.0015548	-0.00241367	-0.00197241	-0.00208425	-0.00241165	-0.00237499	-0.00197718	-0.00196372
86345	-0.00198395	-0.0020541	0.00155481	-0.00241373	-0.00197236	-0.00208426	-0.00241163	-0.002375	-0.00197719	-0.00196379		86345	-0.00198395	-0.00205409	0.0015548	-0.00241366	-0.0019724	-0.00208422	-0.00241166	-0.00237495	-0.00197717	-0.00196371		86345	-0.00198397	-0.00205411	0.0015548	-0.00241367	-0.00197241	-0.00208424	-0.00241166	-0.00237495	-0.00197717	-0.00196374		86345	-0.00198398	-0.00205412	0.0015548	-0.00241367	-0.00197241	-0.00208425	-0.00241165	-0.00237499	-0.00197718	-0.00196372
86346	-0.00198395	-0.0020541	0.00155481	-0.00241373	-0.00197236	-0.00208426	-0.00241163	-0.002375	-0.00197719	-0.00196379		86346	-0.00198395	-0.00205409	0.0015548	-0.00241366	-0.0019724	-0.00208422	-0.00241166	-0.00237495	-0.00197717	-0.00196371		86346	-0.00198397	-0.00205411	0.0015548	-0.00241367	-0.00197241	-0.00208424	-0.00241166	-0.00237495	-0.00197717	-0.00196374		86346	-0.00198398	-0.00205412	0.0015548	-0.00241367	-0.00197241	-0.00208425	-0.00241165	-0.00237499	-0.00197718	-0.00196372
86347	-0.00198395	-0.0020541	0.00155481	-0.00241373	-0.00197236	-0.00208426	-0.00241163	-0.002375	-0.00197719	-0.00196379		86347	-0.00198395	-0.00205409	0.0015548	-0.00241366	-0.0019724	-0.00208422	-0.00241166	-0.00237495	-0.00197717	-0.00196371		86347	-0.00198397	-0.00205411	0.0015548	-0.00241367	-0.00197241	-0.00208424	-0.00241166	-0.00237495	-0.00197717	-0.00196374		86347	-0.00198398	-0.00205412	0.0015548	-0.00241367	-0.00197241	-0.00208425	-0.00241165	-0.00237499	-0.00197718	-0.00196372
86348	-0.00198395	-0.0020541	0.00155481	-0.00241373	-0.00197236	-0.00208426	-0.00241163	-0.002375	-0.00197719	-0.00196379		86348	-0.00198395	-0.00205409	0.0015548	-0.00241366	-0.0019724	-0.00208422	-0.00241166	-0.00237495	-0.00197717	-0.00196371		86348	-0.00198397	-0.00205411	0.0015548	-0.00241367	-0.00197241	-0.00208424	-0.00241166	-0.00237495	-0.00197717	-0.00196374		86348	-0.00198398	-0.00205412	0.0015548	-0.00241367	-0.00197241	-0.00208425	-0.00241165	-0.00237499	-0.00197718	-0.00196372
86349	-0.00198395	-0.0020541	0.00155481	-0.00241373	-0.00197236	-0.00208426	-0.00241163	-0.002375	-0.00197719	-0.00196379		86349	-0.00198395	-0.00205409	0.0015548	-0.00241366	-0.0019724	-0.00208422	-0.00241166	-0.00237495	-0.00197717	-0.00196371		86349	-0.00198397	-0.00205411	0.0015548	-0.00241367	-0.00197241	-0.00208424	-0.00241166	-0.00237495	-0.00197717	-0.00196374		86349	-0.00198398	-0.00205412	0.0015548	-0.00241367	-0.00197241	-0.00208425	-0.00241165	-0.00237499	-0.00197718	-0.00196372
86350	-0.00198395	-0.0020541	0.00155481	-0.00241373	-0.00197236	-0.00208426	-0.00241163	-0.002375	-0.00197719	-0.00196379		86350	-0.00198395	-0.00205409	0.0015548	-0.00241366	-0.0019724	-0.00208422	-0.00241166	-0.00237495	-0.00197717	-0.00196371		86350	-0.00198397	-0.00205411	0.0015548	-0.00241367	-0.00197241	-0.00208424	-0.00241166	-0.00237495	-0.00197717	-0.00196374		86350	-0.00198398	-0.00205412	0.0015548	-0.00241367	-0.00197241	-0.00208425	-0.00241165	-0.00237499	-0.00197718	-0.00196372
86351	-0.00198395	-0.0020541	0.00155481	-0.00241373	-0.00197236	-0.00208426	-0.00241163	-0.002375	-0.00197719	-0.00196379		86351	-0.00198395	-0.00205409	0.0015548	-0.00241366	-0.0019724	-0.00208422	-0.00241166	-0.00237495	-0.00197717	-0.00196371		86351	-0.00198397	-0.00205411	0.0015548	-0.00241367	-0.00197241	-0.00208424	-0.00241166	-0.00237495	-0.00197717	-0.00196374		86351	-0.00198398	-0.00205412	0.0015548	-0.00241367	-0.00197241	-0.00208425	-0.00241165	-0.00237499	-0.00197718	-0.00196372
86352	-0.00198395	-0.0020541	0.00155481	-0.00241373	-0.00197236	-0.00208426	-0.00241163	-0.002375	-0.00197719	-0.00196379		86352	-0.00198395	-0.00205409	0.0015548	-0.00241366	-0.0019724	-0.00208422	-0.00241166	-0.00237495	-0.00197717	-0.00196371		86352	-0.00198397	-0.00205411	0.0015548	-0.00241367	-0.00197241	-0.00208424	-0.00241166	-0.00237495	-0.00197717	-0.00196374		86352	-0.00198398	-0.00205412	0.0015548	-0.00241367	-0.00197241	-0.00208425	-0.00241165	-0.00237499	-0.00197718	-0.00196372
86353	-0.00198395	-0.0020541	0.00155481	-0.00241373	-0.00197236	-0.00208426	-0.00241163	-0.002375	-0.00197719	-0.00196379		86353	-0.00198395	-0.00205409	0.0015548	-0.00241366	-0.0019724	-0.00208422	-0.00241166	-0.00237495	-0.00197717	-0.00196371		86353	-0.00198397	-0.00205411	0.0015548	-0.00241367	-0.00197241	-0.00208424	-0.00241166	-0.00237495	-0.00197717	-0.00196374		86353	-0.00198398	-0.00205412	0.0015548	-0.00241367	-0.00197241	-0.00208425	-0.00241165	-0.00237499	-0.00197718	-0.00196372
86354	-0.00198395	-0.0020541	0.00155481	-0.00241373	-0.00197236	-0.00208426	-0.00241163	-0.002375	-0.00197719	-0.00196379		86354	-0.00198395	-0.00205409	0.0015548	-0.00241366	-0.0019724	-0.00208422	-0.00241166	-0.00237495	-0.00197717	-0.00196371		86354	-0.00198397	-0.00205411	0.0015548	-0.00241367	-0.00197241	-0.00208424	-0.00241166	-0.00237495	-0.00197717	-0.00196374		86354	-0.00198398	-0.00205412	0.0015548	-0.00241367	-0.00197241	-0.00208425	-0.00241165	-0.00237499	-0.00197718	-0.00196372
86355	-0.00198395	-0.0020541	0.00155481	-0.00241373	-0.00197236	-0.00208426	-0.00241163	-0.002375	-0.00197719	-0.00196379		86355	-0.00198395	-0.00205409	0.0015548	-0.00241366	-0.0019724	-0.00208422	-0.00241166	-0.00237495	-0.00197717	-0.00196371		86355	-0.00198397	-0.00205411	0.0015548	-0.00241367	-0.00197241	-0.00208424	-0.00241166	-0.00237495	-0.00197717	-0.00196374		86355	-0.00198398	-0.00205412	0.0015548	-0.00241367	-0.00197241	-0.00208425	-0.00241165	-0.00237499	-0.00197718	-0.00196372
86356	-0.00198395	-0.0020541	0.00155481	-0.00241373	-0.00197236	-0.00208426	-0.00241163	-0.002375	-0.00197719	-0.00196379		86356	-0.00198395	-0.00205409	0.0015548	-0.00241366	-0.0019724	-0.00208422	-0.00241166	-0.00237495	-0.00197717	-0.00196371		86356	-0.00198397	-0.00205411	0.0015548	-0.00241367	-0.00197241	-0.00208424	-0.00241166	-0.00237495	-0.00197717	-0.00196374		86356	-0.00198398	-0.00205412	0.0015548	-0.00241367	-0.00197241	-0.00208425	-0.00241165	-0.00237499	-0.00197718	-0.00196372
86357	-0.00198395	-0.0020541	0.00155481	-0.00241373	-0.00197236	-0.00208426	-0.00241163	-0.002375	-0.00197719	-0.00196379		86357	-0.00198395	-0.00205409	0.0015548	-0.00241366	-0.0019724	-0.00208422	-0.00241166	-0.00237495	-0.00197717	-0.00196371		86357	-0.00198397	-0.00205411	0.0015548	-0.00241367	-0.00197241	-0.00208424	-0.00241166	-0.00237495	-0.00197717	-0.00196374		86357	-0.00198398	-0.00205412	0.0015548	-0.00241367	-0.00197241	-0.00208425	-0.00241165	-0.00237499	-0.00197718	-0.00196372
86358	-0.00198395	-0.0020541	0.00155481	-0.00241373	-0.00197236	-0.00208426	-0.00241163	-0.002375	-0.00197719	-0.00196379		86358	-0.00198395	-0.00205409	0.0015548	-0.00241366	-0.0019724	-0.00208422	-0.00241166	-0.00237495	-0.00197717	-0.00196371		86358	-0.00198397	-0.00205411	0.0015548	-0.00241367	-0.00197241	-0.00208424	-0.00241166	-0.00237495	-0.00197717	-0.00196374		86358	-0.00198398	-0.00205412	0.0015548	-0.00241367	-0.00197241	-0.00208425	-0.00241165	-0.00237499	-0.00197718	-0.00196372
86359	-0.00198395	-0.0020541	0.00155481	-0.00241373	-0.00197236	-0.00208426	-0.00241163	-0.002375	-0.00197719	-0.00196379		86359	-0.00198395	-0.00205409	0.0015548	-0.00241366	-0.0019724	-0.00208422	-0.00241166	-0.00237495	-0.00197717	-0.00196371		86359	-0.00198397	-0.00205411	0.0015548	-0.00241367	-0.00197241	-0.00208424	-0.00241166	-0.00237495	-0.00197717	-0.00196374		86359	-0.00198398	-0.00205412	0.0015548	-0.00241367	-0.00197241	-0.00208425	-0.00241165	-0.00237499	-0.00197718	-0.00196372
86360	-0.00198395	-0.0020541	0.00155481	-0.00241373	-0.00197236	-0.00208426	-0.00241163	-0.002375	-0.00197719	-0.00196379		86360	-0.00198395	-0.00205409	0.0015548	-0.00241366	-0.0019724	-0.00208422	-0.00241166	-0.00237495	-0.00197717	-0.00196371		86360	-0.00198397	-0.00205411	0.0015548	-0.00241367	-0.00197241	-0.00208424	-0.00241166	-0.00237495	-0.00197717	-0.00196374		86360	-0.00198398	-0.00205412	0.0015548	-0.00241367	-0.00197241	-0.00208425	-0.00241165	-0.00237499	-0.00197718	-0.00196372
86361	-0.00198395	-0.0020541	0.00155481	-0.00241373	-0.00197236	-0.00208426	-0.00241163	-0.002375	-0.00197719	-0.00196379		86361	-0.00198395	-0.00205409	0.0015548	-0.00241366	-0.0019724	-0.00208422	-0.00241166	-0.00237495	-0.00197717	-0.00196371		86361	-0.00198397	-0.00205411	0.0015548	-0.00241367	-0.00197241	-0.00208424	-0.00241166	-0.00237495	-0.00197717	-0.00196374		86361	-0.00198398	-0.00205412	0.0015548	-0.00241367	-0.00197241	-0.00208425	-0.00241165	-0.00237499	-0.00197718	-0.00196372
86362	-0.00198395	-0.0020541	0.00155481	-0.00241373	-0.00197236	-0.00208426	-0.00241163	-0.002375	-0.00197719	-0.00196379		86362	-0.00198395	-0.00205409	0.0015548	-0.00241366	-0.0019724	-0.00208422	-0.00241166	-0.00237495	-0.00197717	-0.00196371		86362	-0.00198397	-0.00205411	0.0015548	-0.00241367	-0.00197241	-0.00208424	-0.00241166	-0.00237495	-0.00197717	-0.00196374		86362	-0.00198398	-0.00205412	0.0015548	-0.00241367	-0.00197241	-0.00208425	-0.00241165	-0.00237499	-0.00197718	-0.00196372
86363	-0.00198395	-0.0020541	0.00155481	-0.00241373	-0.00197236	-0.00208426	-0.00241163	-0.002375	-0.00197719	-0.00196379		86363	-0.00198395	-0.00205409	0.0015548	-0.00241366	-0.0019724	-0.00208422	-0.00241166	-0.00237495	-0.00197717	-0.00196371		86363	-0.00198397	-0.00205411	0.0015548	-0.00241367	-0.00197241	-0.00208424	-0.00241166	-0.00237495	-0.00197717	-0.00196374		86363	-0.00198398	-0.00205412	0.0015548	-0.00241367	-0.00197241	-0.00208425	-0.00241165	-0.00237499	-0.00197718	-0.00196372
86364	-0.00198395	-0.0020541	0.00155481	-0.00241373	-0.00197236	-0.00208426	-0.00241163	-0.002375	-0.00197719	-0.00196379		86364	-0.00198395	-0.00205409	0.0015548	-0.00241366	-0.0019724	-0.00208422	-0.00241166	-0.00237495	-0.00197717	-0.00196371		86364	-0.00198397	-0.00205411	0.0015548	-0.00241367	-0.00197241	-0.00208424	-0.00241166	-0.00237495	-0.00197717	-0.00196374		86364	-0.00198398	-0.00205412	0.0015548	-0.00241367	-0.00197241	-0.00208425	-0.00241165	-0.00237499	-0.00197718	-0.00196372
86365	-0.00198395	-0.0020541	0.00155481	-0.00241373	-0.00197236	-0.00208426	-0.00241163	-0.002375	-0.00197719	-0.00196379		86365	-0.00198395	-0.00205409	0.0015548	-0.00241366	-0.0019724	-0.00208422	-0.00241166	-0.00237495	-0.00197717	-0.00196371		86365	-0.00198397	-0.00205411	0.0015548	-0.00241367	-0.00197241	-0.00208424	-0.00241166	-0.00237495	-0.00197717	-0.00196374		86365	-0.00198398	-0.00205412	0.0015548	-0.00241367	-0.00197241	-0.00208425	-0.00241165	-0.00237499	-0.00197718	-0.00196372
86366	-0.00198395	-0.0020541	0.00155481	-0.00241373	-0.00197236	-0.00208426	-0.00241163	-0.002375	-0.00197719	-0.00196379		86366	-0.00198395	-0.00205409	0.0015548	-0.00241366	-0.0019724	-0.00208422	-0.00241166	-0.00237495	-0.00197717	-0.00196371		86366	-0.00198397	-0.00205411	0.0015548	-0.00241367	-0.00197241	-0.00208424	-0.00241166	-0.00237495	-0.00197717	-0.00196374		86366	-0.00198398	-0.00205412	0.0015548	-0.00241367	-0.00197241	-0.00208425	-0.00241165	-0.00237499	-0.00197718	-0.00196372
86367	-0.00198395	-0.0020541	0.00155481	-0.00241373	-0.00197236	-0.00208426	-0.00241163	-0.002375	-0.00197719	-0.00196379		86367	-0.00198395	-0.00205409	0.0015548	-0.00241366	-0.0019724	-0.00208422	-0.00241166	-0.00237495	-0.00197717	-0.00196371		86367	-0.00198397	-0.00205411	0.0015548	-0.00241367	-0.00197241	-0.00208424	-0.00241166	-0.00237495	-0.00197717	-0.00196374		86367	-0.00198398	-0.00205412	0.0015548	-0.00241367	-0.00197241	-0.00208425	-0.00241165	-0.00237499	-0.00197718	-0.00196372
86368	-0.00198395	-0.0020541	0.00155481	-0.00241373	-0.00197236	-0.00208426	-0.00241163	-0.002375	-0.00197719	-0.00196379		86368	-0.00198395	-0.00205409	0.0015548	-0.00241366	-0.0019724	-0.00208422	-0.00241166	-0.00237495	-0.00197717	-0.00196371		86368	-0.00198397	-0.00205411	0.0015548	-0.00241367	-0.00197241	-0.00208424	-0.00241166	-0.00237495	-0.00197717	-0.00196374		86368	-0.00198398	-0.00205412	0.0015548	-0.00241367	-0.00197241	-0.00208425	-0.00241165	-0.00237499	-0.00197718	-0.00196372
86369	-0.00198395	-0.0020541	0.00155481	-0.00241373	-0.00197236	-0.00208426	-0.00241163	-0.002375	-0.00197719	-0.00196379		86369	-0.00198395	-0.00205409	0.0015548	-0.00241366	-0.0019724	-0.00208422	-0.00241166	-0.00237495	-0.00197717	-0.00196371		86369	-0.00198397	-0.00205411	0.0015548	-0.00241367	-0.00197241	-0.00208424	-0.00241166	-0.00237495	-0.00197717	-0.00196374		86369	-0.00198398	-0.00205412	0.0015548	-0.00241367	-0.00197241	-0.00208425	-0.00241165	-0.00237499	-0.00197718	-0.00196372
86370	-0.00198395	-0.0020541	0.00155481	-0.00241373	-0.00197236	-0.00208426	-0.00241163	-0.002375	-0.00197719	-0.00196379		86370	-0.00198395	-0.00205409	0.0015548	-0.00241366	-0.0019724	-0.00208422	-0.00241166	-0.00237495	-0.00197717	-0.00196371		86370	-0.00198397	-0.00205411	0.0015548	-0.00241367	-0.00197241	-0.00208424	-0.00241166	-0.00237495	-0.00197717	-0.00196374		86370	-0.00198398	-0.00205412	0.0015548	-0.00241367	-0.00197241	-0.00208425	-0.00241165	-0.00237499	-0.00197718	-0.00196372
86371	-0.00198395	-0.0020541	0.00155481	-0.00241373	-0.00197236	-0.00208426	-0.00241163	-0.002375	-0.00197719	-0.00196379		86371	-0.00198395	-0.00205409	0.0015548	-0.00241366	-0.0019724	-0.00208422	-0.00241166	-0.00237495	-0.00197717	-0.00196371		86371	-0.00198397	-0.00205411	0.0015548	-0.00241367	-0.00197241	-0.00208424	-0.00241166	-0.00237495	-0.00197717	-0.00196374		86371	-0.00198398	-0.00205412	0.0015548	-0.00241367	-0.00197241	-0.00208425	-0.00241165	-0.00237499	-0.00197718	-0.00196372
86372	-0.00198395	-0.0020541	0.00155481	-0.00241373	-0.00197236	-0.00208426	-0.00241163	-0.002375	-0.00197719	-0.00196379		86372	-0.00198395	-0.00205409	0.0015548	-0.00241366	-0.0019724	-0.00208422	-0.00241166	-0.00237495	-0.00197717	-0.00196371		86372	-0.00198397	-0.00205411	0.0015548	-0.00241367	-0.00197241	-0.00208424	-0.00241166	-0.00237495	-0.00197717	-0.00196374		86372	-0.00198398	-0.00205412	0.0015548	-0.00241367	-0.00197241	-0.00208425	-0.00241165	-0.00237499	-0.00197718	-0.00196372
86373	-0.00198395	-0.0020541	0.00155481	-0.00241373	-0.00197236	-0.00208426	-0.00241163	-0.002375	-0.00197719	-0.00196379		86373	-0.00198395	-0.00205409	0.0015548	-0.00241366	-0.0019724	-0.00208422	-0.00241166	-0.00237495	-0.00197717	-0.00196371		86373	-0.00198397	-0.00205411	0.0015548	-0.00241367	-0.00197241	-0.00208424	-0.00241166	-0.00237495	-0.00197717	-0.00196374		86373	-0.00198398	-0.00205412	0.0015548	-0.00241367	-0.00197241	-0.00208425	-0.00241165	-0.00237499	-0.00197718	-0.00196372
86374	-0.00198395	-0.0020541	0.00155481	-0.00241373	-0.00197236	-0.00208426	-0.00241163	-0.002375	-0.00197719	-0.00196379		86374	-0.00198395	-0.00205409	0.0015548	-0.00241366	-0.0019724	-0.00208422	-0.00241166	-0.00237495	-0.00197717	-0.00196371		86374	-0.00198397	-0.00205411	0.0015548	-0.00241367	-0.00197241	-0.00208424	-0.00241166	-0.00237495	-0.00197717	-0.00196374		86374	-0.00198398	-0.00205412	0.0015548	-0.00241367	-0.00197241	-0.00208425	-0.00241165	-0.00237499	-0.00197718	-0.00196372
86375	-0.00198395	-0.0020541	0.00155481	-0.00241373	-0.00197236	-0.00208426	-0.00241163	-0.002375	-0.00197719	-0.00196379		86375	-0.00198395	-0.00205409	0.0015548	-0.00241366	-0.0019724	-0.00208422	-0.00241166	-0.00237495	-0.00197717	-0.00196371		86375	-0.00198397	-0.00205411	0.0015548	-0.00241367	-0.00197241	-0.00208424	-0.00241166	-0.00237495	-0.00197717	-0.00196374		86375	-0.00198398	-0.00205412	0.0015548	-0.00241367	-0.00197241	-0.00208425	-0.00241165	-0.00237499	-0.00197718	-0.00196372
86376	-0.00198395	-0.0020541	0.00155481	-0.00241373	-0.00197236	-0.00208426	-0.00241163	-0.002375	-0.00197719	-0.00196379		86376	-0.00198395	-0.00205409	0.0015548	-0.00241366	-0.0019724	-0.00208422	-0.00241166	-0.00237495	-0.00197717	-0.00196371		86376	-0.00198397	-0.00205411	0.0015548	-0.00241367	-0.00197241	-0.00208424	-0.00241166	-0.00237495	-0.00197717	-0.00196374		86376	-0.00198398	-0.00205412	0.0015548	-0.00241367	-0.00197241	-0.00208425	-0.00241165	-0.00237499	-0.00197718	-0.00196372
86377	-0.00198395	-0.0020541	0.00155481	-0.00241373	-0.00197236	-0.00208426	-0.00241163	-0.002375	-0.00197719	-0.00196379		86377	-0.00198395	-0.00205409	0.0015548	-0.00241366	-0.0019724	-0.00208422	-0.00241166	-0.00237495	-0.00197717	-0.00196371		86377	-0.00198397	-0.00205411	0.0015548	-0.00241367	-0.00197241	-0.00208424	-0.00241166	-0.00237495	-0.00197717	-0.00196374		86377	-0.00198398	-0.00205412	0.0015548	-0.00241367	-0.00197241	-0.00208425	-0.00241165	-0.00237499	-0.00197718	-0.00196372
86378	-0.00198395	-0.0020541	0.00155481	-0.00241373	-0.00197236	-0.00208426	-0.00241163	-0.002375	-0.00197719	-0.00196379		86378	-0.00198395	-0.00205409	0.0015548	-0.00241366	-0.0019724	-0.00208422	-0.00241166	-0.00237495	-0.00197717	-0.00196371		86378	-0.00198397	-0.00205411	0.0015548	-0.00241367	-0.00197241	-0.00208424	-0.00241166	-0.00237495	-0.00197717	-0.00196374		86378	-0.00198398	-0.00205412	0.0015548	-0.00241367	-0.00197241	-0.00208425	-0.00241165	-0.00237499	-0.00197718	-0.00196372
86379	-0.00198395	-0.0020541	0.00155481	-0.00241373	-0.00197236	-0.00208426	-0.00241163	-0.002375	-0.00197719	-0.00196379		86379	-0.00198395	-0.00205409	0.0015548	-0.00241366	-0.0019724	-0.00208422	-0.00241166	-0.00237495	-0.00197717	-0.00196371		86379	-0.00198397	-0.00205411	0.0015548	-0.00241367	-0.00197241	-0.00208424	-0.00241166	-0.00237495	-0.00197717	-0.00196374		86379	-0.00198398	-0.00205412	0.0015548	-0.00241367	-0.00197241	-0.00208425	-0.00241165	-0.00237499	-0.00197718	-0.00196372
86380	-0.00198395	-0.0020541	0.00155481	-0.00241373	-0.00197236	-0.00208426	-0.00241163	-0.002375	-0.00197719	-0.00196379		86380	-0.00198395	-0.00205409	0.0015548	-0.00241366	-0.0019724	-0.00208422	-0.00241166	-0.00237495	-0.00197717	-0.00196371		86380	-0.00198397	-0.00205411	0.0015548	-0.00241367	-0.00197241	-0.00208424	-0.00241166	-0.00237495	-0.00197717	-0.00196374		86380	-0.00198398	-0.00205412	0.0015548	-0.00241367	-0.00197241	-0.00208425	-0.00241165	-0.00237499	-0.00197718	-0.00196372
86381	-0.00198395	-0.0020541	0.00155481	-0.00241373	-0.00197236	-0.00208426	-0.00241163	-0.002375	-0.00197719	-0.00196379		86381	-0.00198395	-0.00205409	0.0015548	-0.00241366	-0.0019724	-0.00208422	-0.00241166	-0.00237495	-0.00197717	-0.00196371		86381	-0.00198397	-0.00205411	0.0015548	-0.00241367	-0.00197241	-0.00208424	-0.00241166	-0.00237495	-0.00197717	-0.00196374		86381	-0.00198398	-0.00205412	0.0015548	-0.00241367	-0.00197241	-0.00208425	-0.00241165	-0.00237499	-0.00197718	-0.00196372
86382	-0.00198395	-0.0020541	0.00155481	-0.00241373	-0.00197236	-0.00208426	-0.00241163	-0.002375	-0.00197719	-0.00196379		86382	-0.00198395	-0.00205409	0.0015548	-0.00241366	-0.0019724	-0.00208422	-0.00241166	-0.00237495	-0.00197717	-0.00196371		86382	-0.00198397	-0.00205411	0.0015548	-0.00241367	-0.00197241	-0.00208424	-0.00241166	-0.00237495	-0.00197717	-0.00196374		86382	-0.00198398	-0.00205412	0.0015548	-0.00241367	-0.00197241	-0.00208425	-0.00241165	-0.00237499	-0.00197718	-0.00196372
86383	-0.00198395	-0.0020541	0.00155481	-0.00241373	-0.00197236	-0.00208426	-0.00241163	-0.002375	-0.00197719	-0.00196379		86383	-0.00198395	-0.00205409	0.0015548	-0.00241366	-0.0019724	-0.00208422	-0.00241166	-0.00237495	-0.00197717	-0.00196371		86383	-0.00198397	-0.00205411	0.0015548	-0.00241367	-0.00197241	-0.00208424	-0.00241166	-0.00237495	-0.00197717	-0.00196374		86383	-0.00198398	-0.00205412	0.0015548	-0.00241367	-0.00197241	-0.00208425	-0.00241165	-0.00237499	-0.00197718	-0.00196372
86384	-0.00198395	-0.0020541	0.00155481	-0.00241373	-0.00197236	-0.00208426	-0.00241163	-0.002375	-0.00197719	-0.00196379		86384	-0.00198395	-0.00205409	0.0015548	-0.00241366	-0.0019724	-0.00208422	-0.00241166	-0.00237495	-0.00197717	-0.00196371		86384	-0.00198397	-0.00205411	0.0015548	-0.00241367	-0.00197241	-0.00208424	-0.00241166	-0.00237495	-0.00197717	-0.00196374		86384	-0.00198398	-0.00205412	0.0015548	-0.00241367	-0.00197241	-0.00208425	-0.00241165	-0.00237499	-0.00197718	-0.00196372
86385	-0.00198395	-0.0020541	0.00155481	-0.00241373	-0.00197236	-0.00208426	-0.00241163	-0.002375	-0.00197719	-0.00196379		86385	-0.00198395	-0.00205409	0.0015548	-0.00241366	-0.0019724	-0.00208422	-0.00241166	-0.00237495	-0.00197717	-0.00196371		86385	-0.00198397	-0.00205411	0.0015548	-0.00241367	-0.00197241	-0.00208424	-0.00241166	-0.00237495	-0.00197717	-0.00196374		86385	-0.00198398	-0.00205412	0.0015548	-0.00241367	-0.00197241	-0.00208425	-0.00241165	-0.00237499	-0.00197718	-0.00196372
86386	-0.00198395	-0.0020541	0.00155481	-0.00241373	-0.00197236	-0.00208426	-0.00241163	-0.002375	-0.00197719	-0.00196379		86386	-0.00198395	-0.00205409	0.0015548	-0.00241366	-0.0019724	-0.00208422	-0.00241166	-0.00237495	-0.00197717	-0.00196371		86386	-0.00198397	-0.00205411	0.0015548	-0.00241367	-0.00197241	-0.00208424	-0.00241166	-0.00237495	-0.00197717	-0.00196374		86386	-0.00198398	-0.00205412	0.0015548	-0.00241367	-0.00197241	-0.00208425	-0.00241165	-0.00237499	-0.00197718	-0.00196372
86387	-0.00198395	-0.0020541	0.00155481	-0.00241373	-0.00197236	-0.00208426	-0.00241163	-0.002375	-0.00197719	-0.00196379		86387	-0.00198395	-0.00205409	0.0015548	-0.00241366	-0.0019724	-0.00208422	-0.00241166	-0.00237495	-0.00197717	-0.00196371		86387	-0.00198397	-0.00205411	0.0015548	-0.00241367	-0.00197241	-0.00208424	-0.00241166	-0.00237495	-0.00197717	-0.00196374		86387	-0.00198398	-0.00205412	0.0015548	-0.00241367	-0.00197241	-0.00208425	-0.00241165	-0.00237499	-0.00197718	-0.00196372
86388	-0.00198395	-0.0020541	0.00155481	-0.00241373	-0.00197236	-0.00208426	-0.00241163	-0.002375	-0.00197719	-0.00196379		86388	-0.00198395	-0.00205409	0.0015548	-0.00241366	-0.0019724	-0.00208422	-0.00241166	-0.00237495	-0.00197717	-0.00196371		86388	-0.00198397	-0.00205411	0.0015548	-0.00241367	-0.00197241	-0.00208424	-0.00241166	-0.00237495	-0.00197717	-0.00196374		86388	-0.00198398	-0.00205412	0.0015548	-0.00241367	-0.00197241	-0.00208425	-0.00241165	-0.00237499	-0.00197718	-0.00196372
86389	-0.00198395	-0.0020541	0.00155481	-0.00241373	-0.00197236	-0.00208426	-0.00241163	-0.002375	-0.00197719	-0.00196379		86389	-0.00198395	-0.00205409	0.0015548	-0.00241366	-0.0019724	-0.00208422	-0.00241166	-0.00237495	-0.00197717	-0.00196371		86389	-0.00198397	-0.00205411	0.0015548	-0.00241367	-0.00197241	-0.00208424	-0.00241166	-0.00237495	-0.00197717	-0.00196374		86389	-0.00198398	-0.00205412	0.0015548	-0.00241367	-0.00197241	-0.00208425	-0.00241165	-0.00237499	-0.00197718	-0.00196372
86390	-0.00198395	-0.0020541	0.00155481	-0.00241373	-0.00197236	-0.00208426	-0.00241163	-0.002375	-0.00197719	-0.00196379		86390	-0.00198395	-0.00205409	0.0015548	-0.00241366	-0.0019724	-0.00208422	-0.00241166	-0.00237495	-0.00197717	-0.00196371		86390	-0.00198397	-0.00205411	0.0015548	-0.00241367	-0.00197241	-0.00208424	-0.00241166	-0.00237495	-0.00197717	-0.00196374		86390	-0.00198398	-0.00205412	0.0015548	-0.00241367	-0.00197241	-0.00208425	-0.00241165	-0.00237499	-0.00197718	-0.00196372
86391	-0.00198395	-0.0020541	0.00155481	-0.00241373	-0.00197236	-0.00208426	-0.00241163	-0.002375	-0.00197719	-0.00196379		86391	-0.00198395	-0.00205409	0.0015548	-0.00241366	-0.0019724	-0.00208422	-0.00241166	-0.00237495	-0.00197717	-0.00196371		86391	-0.00198397	-0.00205411	0.0015548	-0.00241367	-0.00197241	-0.00208424	-0.00241166	-0.00237495	-0.00197717	-0.00196374		86391	-0.00198398	-0.00205412	0.0015548	-0.00241367	-0.00197241	-0.00208425	-0.00241165	-0.00237499	-0.00197718	-0.00196372
86392	-0.00198395	-0.0020541	0.00155481	-0.00241373	-0.00197236	-0.00208426	-0.00241163	-0.002375	-0.00197719	-0.00196379		86392	-0.00198395	-0.00205409	0.0015548	-0.00241366	-0.0019724	-0.00208422	-0.00241166	-0.00237495	-0.00197717	-0.00196371		86392	-0.00198397	-0.00205411	0.0015548	-0.00241367	-0.00197241	-0.00208424	-0.00241166	-0.00237495	-0.00197717	-0.00196374		86392	-0.00198398	-0.00205412	0.0015548	-0.00241367	-0.00197241	-0.00208425	-0.00241165	-0.00237499	-0.00197718	-0.00196372
86393	-0.00198395	-0.0020541	0.00155481	-0.00241373	-0.00197236	-0.00208426	-0.00241163	-0.002375	-0.00197719	-0.00196379		86393	-0.00198395	-0.00205409	0.0015548	-0.00241366	-0.0019724	-0.00208422	-0.00241166	-0.00237495	-0.00197717	-0.00196371		86393	-0.00198397	-0.00205411	0.0015548	-0.00241367	-0.00197241	-0.00208424	-0.00241166	-0.00237495	-0.00197717	-0.00196374		86393	-0.00198398	-0.00205412	0.0015548	-0.00241367	-0.00197241	-0.00208425	-0.00241165	-0.00237499	-0.00197718	-0.00196372
86394	-0.00198395	-0.0020541	0.00155481	-0.00241373	-0.00197236	-0.00208426	-0.00241163	-0.002375	-0.00197719	-0.00196379		86394	-0.00198395	-0.00205409	0.0015548	-0.00241366	-0.0019724	-0.00208422	-0.00241166	-0.00237495	-0.00197717	-0.00196371		86394	-0.00198397	-0.00205411	0.0015548	-0.00241367	-0.00197241	-0.00208424	-0.00241166	-0.00237495	-0.00197717	-0.00196374		86394	-0.00198398	-0.00205412	0.0015548	-0.00241367	-0.00197241	-0.00208425	-0.00241165	-0.00237499	-0.00197718	-0.00196372
86395	-0.00198395	-0.0020541	0.00155481	-0.00241373	-0.00197236	-0.00208426	-0.00241163	-0.002375	-0.00197719	-0.00196379		86395	-0.00198395	-0.00205409	0.0015548	-0.00241366	-0.0019724	-0.00208422	-0.00241166	-0.00237495	-0.00197717	-0.00196371		86395	-0.00198397	-0.00205411	0.0015548	-0.00241367	-0.00197241	-0.00208424	-0.00241166	-0.00237495	-0.00197717	-0.00196374		86395	-0.00198398	-0.00205412	0.0015548	-0.00241367	-0.00197241	-0.00208425	-0.00241165	-0.00237499	-0.00197718	-0.00196372
86396	-0.00198395	-0.0020541	0.00155481	-0.00241373	-0.00197236	-0.00208426	-0.00241163	-0.002375	-0.00197719	-0.00196379		86396	-0.00198395	-0.00205409	0.0015548	-0.00241366	-0.0019724	-0.00208422	-0.00241166	-0.00237495	-0.00197717	-0.00196371		86396	-0.00198397	-0.00205411	0.0015548	-0.00241367	-0.00197241	-0.00208424	-0.00241166	-0.00237495	-0.00197717	-0.00196374		86396	-0.00198398	-0.00205412	0.0015548	-0.00241367	-0.00197241	-0.00208425	-0.00241165	-0.00237499	-0.00197718	-0.00196372
86397	-0.00198395	-0.0020541	0.00155481	-0.00241373	-0.00197236	-0.00208426	-0.00241163	-0.002375	-0.00197719	-0.00196379		86397	-0.00198395	-0.00205409	0.0015548	-0.00241366	-0.0019724	-0.00208422	-0.00241166	-0.00237495	-0.00197717	-0.00196371		86397	-0.00198397	-0.00205411	0.0015548	-0.00241367	-0.00197241	-0.00208424	-0.00241166	-0.00237495	-0.00197717	-0.00196374		86397	-0.00198398	-0.00205412	0.0015548	-0.00241367	-0.00197241	-0.00208425	-0.00241165	-0.00237499	-0.00197718	-0.00196372
86398	-0.00198395	-0.0020541	0.00155481	-0.00241373	-0.00197236	-0.00208426	-0.00241163	-0.002375	-0.00197719	-0.00196379		86398	-0.00198395	-0.00205409	0.0015548	-0.00241366	-0.0019724	-0.00208422	-0.00241166	-0.00237495	-0.00197717	-0.00196371		86398	-0.00198397	-0.00205411	0.0015548	-0.00241367	-0.00197241	-0.00208424	-0.00241166	-0.00237495	-0.00197717	-0.00196374		86398	-0.00198398	-0.00205412	0.0015548	-0.00241367	-0.00197241	-0.00208425	-0.00241165	-0.00237499	-0.00197718	-0.00196372
86399	-0.00198395	-0.0020541	0.00155481	-0.00241373	-0.00197236	-0.00208426	-0.00241163	-0.002375	-0.00197719	-0.00196379		86399	-0.00198395	-0.00205409	0.0015548	-0.00241366	-0.0019724	-0.00208422	-0.00241166	-0.00237495	-0.00197717	-0.00196371		86399	-0.00198397	-0.00205411	0.0015548	-0.00241367	-0.00197241	-0.00208424	-0.00241166	-0.00237495	-0.00197717	-0.00196374		86399	-0.00198398	-0.00205412	0.0015548	-0.00241367	-0.00197241	-0.00208425	-0.00241165	-0.00237499	-0.00197718	-0.00196372
86400	-0.00198395	-0.0020541	0.00155481	-0.00241373	-0.00197236	-0.00208426	-0.00241163	-0.002375	-0.00197719	-0.00196379		86400	-0.00198395	-0.00205409	0.0015548	-0.00241366	-0.0019724	-0.00208422	-0.00241166	-0.00237495	-0.00197717	-0.00196371		86400	-0.00198397	-0.00205411	0.0015548	-0.00241367	-0.00197241	-0.00208424	-0.00241166	-0.00237495	-0.00197717	-0.00196374		86400	-0.00198398	-0.00205412	0.0015548	-0.00241367	-0.00197241	-0.00208425	-0.00241165	-0.00237499	-0.00197718	-0.00196372
86401	-0.0020399	-0.00210452	0.00155339	-0.00243206	-0.00198176	-0.00214709	-0.00243873	-0.00241678	-0.00203938	-0.00196795		86401	-0.00199726	-0.00206545	0.00155465	-0.00241779	-0.00197458	-0.0020992	-0.00241767	-0.00238424	-0.0019924	-0.0019647		86401	-0.00198397	-0.00205411	0.0015548	-0.00241367	-0.00197241	-0.00208424	-0.00241166	-0.00237495	-0.00197717	-0.00196374		86401	-0.00198398	-0.00205412	0.0015548	-0.00241367	-0.00197241	-0.00208425	-0.00241165	-0.00237499	-0.00197718	-0.00196372
86402	-0.00222075	-0.00228452	0.00154864	-0.00255362	-0.00204871	-0.00233477	-0.00259395	-0.00260079	-0.00222354	-0.00199809		86402	-0.00204235	-0.0021082	0.00155364	-0.00244285	-0.00198876	-0.00214568	-0.00245078	-0.00242675	-0.00203906	-0.00197145		86402	-0.00198397	-0.00205411	0.00155475	-0.00241367	-0.00197241	-0.00208424	-0.00241166	-0.00237495	-0.00197717	-0.00196374		86402	-0.00198398	-0.00205412	0.0015548	-0.00241367	-0.00197241	-0.00208425	-0.00241165	-0.00237499	-0.00197718	-0.00196372
86403	-0.00251163	-0.0025785	0.00154036	-0.00282648	-0.00222923	-0.00263323	-0.00289209	-0.0029134	-0.00251632	-0.00208497		86403	-0.00211784	-0.0021818	0.00155119	-0.00250029	-0.00202408	-0.00222229	-0.00251966	-0.00250493	-0.00211567	-0.00198921		86403	-0.00198397	-0.00205411	0.00155464	-0.00241367	-0.00197241	-0.00208424	-0.00241166	-0.00237495	-0.00197717	-0.00196374		86403	-0.00198398	-0.00205412	0.0015548	-0.00241367	-0.00197241	-0.00208425	-0.00241165	-0.00237499	-0.00197718	-0.00196372
86404	-0.00290046	-0.00297306	0.00152836	-0.00322748	-0.0025459	-0.00303068	-0.00330567	-0.00333547	-0.00290642	-0.00226537		86404	-0.00222225	-0.00228472	0.00154686	-0.00259366	-0.00208696	-0.00232769	-0.00262375	-0.00261629	-0.00222091	-0.0020229		86404	-0.00198397	-0.00205411	0.00155442	-0.00241367	-0.00197241	-0.00208424	-0.00241166	-0.00237495	-0.00197717	-0.00196374		86404	-0.00198398	-0.00205412	0.0015548	-0.00241367	-0.00197241	-0.00208425	-0.00241165	-0.00237499	-0.00197718	-0.00196372
86405	-0.00337723	-0.0034575	0.00151245	-0.00373213	-0.00297956	-0.00351705	-0.00381819	-0.00385393	-0.0033841	-0.00257032		86405	-0.0023543	-0.00241535	0.00154034	-0.00272173	-0.00218094	-0.00246037	-0.00276036	-0.00275859	-0.00235356	-0.00207712		86405	-0.00198397	-0.00205411	0.00155408	-0.00241367	-0.00197241	-0.00208424	-0.00241166	-0.00237495	-0.00197717	-0.00196374		86405	-0.00198398	-0.00205412	0.00155479	-0.00241367	-0.00197241	-0.00208425	-0.00241165	-0.00237499	-0.00197718	-0.00196372
86406	-0.00393335	-0.00402282	0.0014924	-0.00432638	-0.00350679	-0.00408364	-0.00441806	-0.00445824	-0.00394093	-0.00300661		86406	-0.00251276	-0.00257176	0.00153138	-0.00288176	-0.00230677	-0.00261849	-0.00292707	-0.00292993	-0.00251247	-0.00215598		86406	-0.00198397	-0.00205411	0.00155357	-0.00241367	-0.00197241	-0.00208424	-0.00241166	-0.00237495	-0.00197717	-0.00196374		86406	-0.00198398	-0.00205412	0.00155478	-0.00241367	-0.00197241	-0.00208425	-0.00241165	-0.00237499	-0.00197718	-0.00196372
86407	-0.00456137	-0.00466125	0.00146799	-0.00499999	-0.00411336	-0.00472287	-0.00509589	-0.00513955	-0.00456953	-0.00355694		86407	-0.00269649	-0.00275264	0.0015198	-0.00307118	-0.00246326	-0.00280084	-0.00312188	-0.00312865	-0.00269653	-0.00226275		86407	-0.00198397	-0.00205411	0.00155289	-0.00241367	-0.00197241	-0.00208424	-0.00241166	-0.00237495	-0.00197717	-0.00196374		86407	-0.00198398	-0.00205412	0.00155477	-0.00241367	-0.00197241	-0.00208425	-0.00241165	-0.00237499	-0.00197718	-0.00196372
86408	-0.00525475	-0.005366	0.00143895	-0.00574462	-0.00479002	-0.00542807	-0.0058438	-0.00589025	-0.00526341	-0.00419824		86408	-0.00290443	-0.00295696	0.00150543	-0.00328789	-0.00264846	-0.00300643	-0.00334307	-0.0033532	-0.0029047	-0.0023995		86408	-0.00198397	-0.00205411	0.001552	-0.00241367	-0.00197241	-0.00208424	-0.00241166	-0.00237495	-0.00197718	-0.00196374		86408	-0.00198398	-0.00205412	0.00155475	-0.00241367	-0.00197241	-0.00208425	-0.00241165	-0.00237499	-0.00197718	-0.00196372
86409	-0.00600772	-0.00613113	0.00140501	-0.00655323	-0.00552962	-0.00619337	-0.006655	-0.00670376	-0.00601682	-0.00491339		86409	-0.00313556	-0.00318375	0.00148811	-0.00353012	-0.00286032	-0.00323432	-0.00358913	-0.00360217	-0.00313599	-0.00256703		86409	-0.00198397	-0.00205411	0.00155089	-0.00241367	-0.00197241	-0.00208424	-0.00241166	-0.00237495	-0.00197718	-0.00196374		86409	-0.00198398	-0.00205412	0.00155473	-0.00241367	-0.00197241	-0.00208425	-0.00241165	-0.00237499	-0.00197718	-0.00196372
86410	-0.00681514	-0.00695135	0.00136588	-0.00741974	-0.00632618	-0.00701355	-0.00752358	-0.00757426	-0.00682467	-0.00569153		86410	-0.00338892	-0.00343209	0.0014677	-0.00379633	-0.00309706	-0.00348363	-0.00385867	-0.00387428	-0.00338945	-0.00276493		86410	-0.00198397	-0.00205411	0.00154954	-0.00241367	-0.00197241	-0.00208424	-0.00241166	-0.00237495	-0.00197718	-0.00196374		86410	-0.00198398	-0.00205412	0.0015547	-0.00241367	-0.00197241	-0.00208425	-0.00241165	-0.00237499	-0.00197718	-0.00196372
86411	-0.00767246	-0.00782197	0.00132122	-0.00833883	-0.00717455	-0.00788395	-0.00844434	-0.00849666	-0.00768238	-0.00652531		86411	-0.00366359	-0.00370113	0.00144408	-0.00408515	-0.00335717	-0.00375351	-0.0041504	-0.00416831	-0.00366418	-0.0029919		86411	-0.00198397	-0.00205411	0.00154793	-0.00241367	-0.00197241	-0.00208424	-0.00241166	-0.00237495	-0.00197718	-0.00196374		86411	-0.00198398	-0.00205412	0.00155467	-0.00241367	-0.00197241	-0.00208425	-0.00241165	-0.00237499	-0.00197718	-0.00196372
86412	-0.00857557	-0.00873879	0.00127068	-0.00930583	-0.00807024	-0.00880041	-0.00941269	-0.00946642	-0.00858587	-0.00740914		86412	-0.00395871	-0.00399005	0.0014171	-0.00439534	-0.00363939	-0.00404314	-0.00446316	-0.00448312	-0.00395931	-0.00324614		86412	-0.00198397	-0.00205411	0.00154604	-0.00241367	-0.00197241	-0.00208424	-0.00241166	-0.00237495	-0.00197718	-0.00196374		86412	-0.00198398	-0.00205412	0.00155464	-0.00241367	-0.00197241	-0.00208425	-0.00241165	-0.00237499	-0.00197718	-0.00196372
86413	-0.00952078	-0.00969805	0.00121387	-0.0103166	-0.00900927	-0.00975918	-0.0104245	-0.0104795	-0.00953147	-0.00833838		86413	-0.00427344	-0.00429806	0.00138663	-0.00472573	-0.00394258	-0.00435177	-0.00479585	-0.00481767	-0.00427403	-0.00352572		86413	-0.00198398	-0.00205411	0.00154387	-0.00241367	-0.00197241	-0.00208424	-0.00241166	-0.00237495	-0.00197718	-0.00196374		86413	-0.00198398	-0.00205412	0.00155459	-0.00241367	-0.00197241	-0.00208425	-0.00241165	-0.00237499	-0.00197718	-0.00196372
86414	-0.0105048	-0.0106963	0.00115035	-0.0113673	-0.00998809	-0.0107569	-0.0114762	-0.0115322	-0.0105158	-0.00930905		86414	-0.00460699	-0.00462441	0.00135255	-0.00507527	-0.00426574	-0.00467865	-0.00514744	-0.00517094	-0.00460754	-0.00382878		86414	-0.00198398	-0.00205411	0.0015414	-0.00241367	-0.00197241	-0.00208424	-0.00241166	-0.00237495	-0.00197718	-0.00196374		86414	-0.00198398	-0.00205412	0.00155454	-0.00241367	-0.00197241	-0.00208425	-0.00241165	-0.00237499	-0.00197718	-0.00196372
86415	-0.0115245	-0.0117306	0.00107965	-0.0124548	-0.0110035	-0.0117905	-0.0125644	-0.0126213	-0.011536	-0.0103176		86415	-0.00495862	-0.00496838	0.0013147	-0.00544295	-0.00460795	-0.00502307	-0.00551698	-0.00554202	-0.00495911	-0.00415368		86415	-0.00198398	-0.00205411	0.00153861	-0.00241367	-0.00197241	-0.00208424	-0.00241166	-0.00237495	-0.00197718	-0.00196374		86415	-0.00198398	-0.00205412	0.00155449	-0.00241367	-0.00197241	-0.00208425	-0.00241165	-0.00237499	-0.00197718	-0.00196372
86416	-0.0125773	-0.012798	0.00100124	-0.013576	-0.0120527	-0.0128571	-0.0136861	-0.0137439	-0.0125891	-0.0113611		86416	-0.00532759	-0.0053293	0.00127295	-0.00582786	-0.00496837	-0.00538436	-0.00590356	-0.00593001	-0.00532802	-0.00449897		86416	-0.00198398	-0.00205411	0.00153551	-0.00241367	-0.00197241	-0.00208424	-0.00241166	-0.00237495	-0.00197718	-0.00196374		86416	-0.00198398	-0.00205412	0.00155443	-0.00241367	-0.00197241	-0.00208425	-0.00241165	-0.00237499	-0.00197718	-0.00196372
86417	-0.0136606	-0.0138961	0.000914547	-0.0147282	-0.0131329	-0.0139544	-0.0148388	-0.0148973	-0.0136728	-0.0124365		86417	-0.00571323	-0.00570652	0.00122713	-0.00622912	-0.00534619	-0.00576188	-0.00630633	-0.00633409	-0.00571357	-0.00486342		86417	-0.00198398	-0.00205411	0.00153207	-0.00241367	-0.00197242	-0.00208424	-0.00241166	-0.00237495	-0.00197719	-0.00196374		86417	-0.00198398	-0.00205412	0.00155436	-0.00241367	-0.00197241	-0.00208425	-0.00241165	-0.00237499	-0.00197718	-0.00196372
86418	-0.0147722	-0.0150224	0.000818914	-0.0159089	-0.014242	-0.0150799	-0.0160198	-0.016079	-0.0147848	-0.0135415		86418	-0.00611487	-0.00609939	0.00117711	-0.00664592	-0.00574068	-0.006155	-0.00672451	-0.00675347	-0.00611512	-0.00524595		86418	-0.00198398	-0.00205411	0.00152828	-0.00241367	-0.00197242	-0.00208424	-0.00241166	-0.00237495	-0.00197719	-0.00196374		86418	-0.00198398	-0.00205412	0.00155428	-0.00241367	-0.00197241	-0.00208425	-0.00241165	-0.00237499	-0.00197718	-0.00196372
86419	-0.0159099	-0.016175	0.000713612	-0.0171159	-0.0153776	-0.0162315	-0.017227	-0.0172868	-0.0159228	-0.0146738		86419	-0.00653189	-0.00650733	0.00112271	-0.00707748	-0.00615112	-0.00656312	-0.00715732	-0.0071874	-0.00653204	-0.00564562		86419	-0.00198399	-0.00205411	0.00152415	-0.00241367	-0.00197242	-0.00208424	-0.00241166	-0.00237495	-0.00197719	-0.00196374		86419	-0.00198398	-0.00205412	0.0015542	-0.00241367	-0.00197241	-0.00208425	-0.00241165	-0.00237499	-0.00197718	-0.00196372
86420	-0.0170718	-0.0173517	0.000597827	-0.0183471	-0.0165378	-0.0174074	-0.0184584	-0.0185187	-0.0170851	-0.0158312		86420	-0.00696368	-0.00692977	0.00106377	-0.00752308	-0.00657686	-0.00698568	-0.00760407	-0.00763519	-0.00696372	-0.00606159		86420	-0.00198399	-0.00205411	0.00151967	-0.00241367	-0.00197242	-0.00208424	-0.00241166	-0.00237495	-0.00197719	-0.00196375		86420	-0.00198398	-0.00205412	0.00155411	-0.00241367	-0.00197241	-0.00208425	-0.00241165	-0.00237499	-0.00197718	-0.00196372
86421	-0.0182562	-0.018551	0.000470634	-0.0196006	-0.0177209	-0.0186056	-0.0197121	-0.0197728	-0.0182699	-0.0170119		86421	-0.00740966	-0.00736613	0.0010001	-0.00798203	-0.00701727	-0.00742213	-0.00806407	-0.00809616	-0.00740959	-0.00649309		86421	-0.00198399	-0.00205411	0.00151482	-0.00241367	-0.00197242	-0.00208424	-0.00241166	-0.00237495	-0.0019772	-0.00196375		86421	-0.00198398	-0.00205412	0.00155402	-0.00241367	-0.00197241	-0.00208425	-0.00241165	-0.00237499	-0.00197718	-0.00196372
86422	-0.0194614	-0.019771	0.000330964	-0.0208748	-0.018925	-0.0198247	-0.0209863	-0.0210475	-0.0194755	-0.0182142		86422	-0.00786929	-0.00781591	0.000931511	-0.00845368	-0.00747174	-0.00787194	-0.00853669	-0.00856968	-0.0078691	-0.0069394		86422	-0.00198399	-0.00205411	0.0015096	-0.00241367	-0.00197243	-0.00208424	-0.00241166	-0.00237495	-0.0019772	-0.00196375		86422	-0.00198398	-0.00205412	0.00155391	-0.00241367	-0.00197241	-0.00208425	-0.00241165	-0.00237499	-0.00197718	-0.00196372
86423	-0.0206859	-0.0210103	0.000177626	-0.0221681	-0.0201488	-0.021063	-0.0222795	-0.0223411	-0.0207005	-0.0194364		86423	-0.00834202	-0.00827859	0.000857813	-0.00893743	-0.0079397	-0.00833461	-0.00902131	-0.00905515	-0.00834171	-0.00739988		86423	-0.001984	-0.00205411	0.00150401	-0.00241367	-0.00197243	-0.00208424	-0.00241166	-0.00237495	-0.0019772	-0.00196375		86423	-0.00198398	-0.00205412	0.0015538	-0.00241367	-0.00197241	-0.00208425	-0.00241165	-0.00237499	-0.00197718	-0.00196372
86424	-0.0219284	-0.0222675	9.28199e-06	-0.0234789	-0.0213907	-0.0223191	-0.0235903	-0.0236523	-0.0219434	-0.0206772		86424	-0.00882735	-0.00875368	0.000778796	-0.00943267	-0.00842061	-0.00880965	-0.00951737	-0.00955201	-0.00882693	-0.0078739		86424	-0.001984	-0.00205411	0.00149804	-0.00241367	-0.00197243	-0.00208424	-0.00241166	-0.00237495	-0.0019772	-0.00196375		86424	-0.00198398	-0.00205412	0.00155368	-0.00241367	-0.00197241	-0.00208425	-0.00241165	-0.00237499	-0.00197718	-0.00196372
86425	-0.0231875	-0.0235412	-0.000175765	-0.024806	-0.0226494	-0.0235918	-0.0249173	-0.0249796	-0.0232029	-0.021935		86425	-0.00932479	-0.00924071	0.000694239	-0.00993888	-0.00891396	-0.0092966	-0.0100243	-0.0100597	-0.00932425	-0.00836089		86425	-0.001984	-0.00205411	0.00149169	-0.00241367	-0.00197244	-0.00208424	-0.00241166	-0.00237495	-0.00197721	-0.00196376		86425	-0.00198398	-0.00205412	0.00155355	-0.00241367	-0.00197241	-0.00208425	-0.00241165	-0.00237499	-0.00197718	-0.00196372
86426	-0.024462	-0.0248303	-0.000379288	-0.0261481	-0.0239238	-0.0248799	-0.0262592	-0.0263219	-0.0244778	-0.0232088		86426	-0.00983387	-0.00973923	0.000603912	-0.0104555	-0.00941923	-0.009795	-0.0105416	-0.0105777	-0.00983322	-0.0088603		86426	-0.00198401	-0.00205411	0.00148495	-0.00241367	-0.00197244	-0.00208424	-0.00241166	-0.00237495	-0.00197721	-0.00196376		86426	-0.00198398	-0.00205412	0.00155341	-0.00241367	-0.00197241	-0.00208425	-0.00241165	-0.00237499	-0.00197718	-0.00196372
86427	-0.0257509	-0.0261337	-0.000603389	-0.0275041	-0.0252127	-0.0261821	-0.027615	-0.0276779	-0.0257671	-0.0244973		86427	-0.0103541	-0.0102488	0.000507569	-0.0109821	-0.00993597	-0.0103044	-0.0110688	-0.0111056	-0.0103534	-0.0093716		86427	-0.00198401	-0.00205411	0.00147782	-0.00241367	-0.00197244	-0.00208424	-0.00241166	-0.00237495	-0.00197722	-0.00196376		86427	-0.00198398	-0.00205412	0.00155327	-0.00241367	-0.00197241	-0.00208425	-0.00241165	-0.00237499	-0.00197718	-0.00196372
86428	-0.027053	-0.0274502	-0.000850763	-0.0288728	-0.026515	-0.0274976	-0.0289835	-0.0290467	-0.0270697	-0.0257994		86428	-0.0108852	-0.010769	0.000404954	-0.0115181	-0.0104637	-0.0108245	-0.0116054	-0.0116428	-0.0108843	-0.0098943		86428	-0.00198402	-0.00205411	0.0014703	-0.00241367	-0.00197245	-0.00208424	-0.00241166	-0.00237495	-0.00197722	-0.00196377		86428	-0.00198398	-0.00205412	0.00155311	-0.00241367	-0.00197241	-0.00208425	-0.00241165	-0.00237499	-0.00197718	-0.00196372
86429	-0.0283675	-0.028779	-0.00112436	-0.0302533	-0.0278297	-0.0288252	-0.0303638	-0.0304272	-0.0283846	-0.0271142		86429	-0.0114265	-0.0112995	0.000295793	-0.0120631	-0.011002	-0.0113547	-0.0121509	-0.0121889	-0.0114255	-0.0104279		86429	-0.00198402	-0.00205411	0.00146239	-0.00241367	-0.00197245	-0.00208424	-0.00241166	-0.00237495	-0.00197723	-0.00196377		86429	-0.00198398	-0.00205412	0.00155295	-0.00241367	-0.00197241	-0.00208425	-0.00241165	-0.00237499	-0.00197718	-0.00196372
86430	-0.0296934	-0.030119	-0.0014281	-0.0316446	-0.029156	-0.0301641	-0.0317549	-0.0318185	-0.0297109	-0.0284406		86430	-0.0119778	-0.0118398	0.000179798	-0.0126167	-0.0115505	-0.0118948	-0.012705	-0.0127436	-0.0119767	-0.0109721		86430	-0.00198403	-0.00205411	0.00145408	-0.00241367	-0.00197246	-0.00208424	-0.00241166	-0.00237495	-0.00197723	-0.00196377		86430	-0.00198398	-0.00205412	0.00155278	-0.00241367	-0.00197241	-0.00208425	-0.00241165	-0.00237499	-0.00197718	-0.00196372
86431	-0.0310299	-0.0314695	-0.00176641	-0.033046	-0.0304929	-0.0315135	-0.0331559	-0.0332197	-0.0310478	-0.0297779		86431	-0.0125387	-0.0123896	5.66631e-05	-0.0131784	-0.0121087	-0.0124443	-0.0132672	-0.0133063	-0.0125375	-0.0115263		86431	-0.00198403	-0.00205411	0.00144537	-0.00241367	-0.00197246	-0.00208424	-0.00241166	-0.00237495	-0.00197724	-0.00196378		86431	-0.00198398	-0.00205412	0.0015526	-0.00241367	-0.00197241	-0.00208425	-0.00241165	-0.00237499	-0.00197718	-0.00196372
86432	-0.0323761	-0.0328297	-0.00214503	-0.0344565	-0.0318398	-0.0328726	-0.0345662	-0.0346302	-0.0323945	-0.0311252		86432	-0.0131087	-0.0129485	-7.3937e-05	-0.0137479	-0.0126763	-0.0130029	-0.0138371	-0.0138767	-0.0131074	-0.0120901		86432	-0.00198404	-0.00205411	0.00143626	-0.00241367	-0.00197247	-0.00208424	-0.00241166	-0.00237495	-0.00197724	-0.00196378		86432	-0.00198398	-0.00205412	0.00155242	-0.00241367	-0.00197241	-0.00208425	-0.00241165	-0.00237499	-0.00197718	-0.00196372
86433	-0.0337314	-0.0341988	-0.00257116	-0.0358755	-0.0331957	-0.0342406	-0.0359848	-0.036049	-0.0337502	-0.0324818		86433	-0.0136875	-0.0135161	-0.000212347	-0.0143248	-0.0132528	-0.0135703	-0.0144144	-0.0144545	-0.0136861	-0.0126632		86433	-0.00198405	-0.00205411	0.00142675	-0.00241367	-0.00197247	-0.00208424	-0.00241166	-0.00237495	-0.00197725	-0.00196379		86433	-0.00198398	-0.00205412	0.00155222	-0.00241367	-0.00197241	-0.00208425	-0.00241165	-0.00237499	-0.00197718	-0.00196372
86434	-0.035095	-0.0355761	-0.00305439	-0.0373022	-0.0345601	-0.0356167	-0.0374112	-0.0374755	-0.0351142	-0.0338469		86434	-0.0142749	-0.0140922	-0.000358933	-0.0149087	-0.013838	-0.0141461	-0.0149987	-0.0150393	-0.0142734	-0.0132451		86434	-0.00198405	-0.00205411	0.00141685	-0.00241367	-0.00197248	-0.00208424	-0.00241166	-0.00237495	-0.00197726	-0.00196379		86434	-0.00198398	-0.00205412	0.00155202	-0.00241367	-0.00197241	-0.00208425	-0.00241165	-0.00237499	-0.00197718	-0.00196372
86435	-0.0364663	-0.0369609	-0.00360673	-0.038736	-0.0359323	-0.0370005	-0.0388446	-0.0389091	-0.036486	-0.0352198		86435	-0.0148703	-0.0146765	-0.000514086	-0.0154994	-0.0144315	-0.0147299	-0.0155896	-0.0156307	-0.0148688	-0.0138356		86435	-0.00198406	-0.00205411	0.00140654	-0.00241367	-0.00197248	-0.00208424	-0.00241166	-0.00237495	-0.00197726	-0.0019638		86435	-0.00198398	-0.00205412	0.00155181	-0.00241367	-0.00197241	-0.00208425	-0.00241165	-0.00237499	-0.00197718	-0.00196372
86436	-0.0378447	-0.0383528	-0.00424534	-0.0401762	-0.0373116	-0.0383912	-0.0402845	-0.0403491	-0.0378648	-0.0366		86436	-0.0154736	-0.0152685	-0.000678222	-0.0160964	-0.015033	-0.0153216	-0.0161869	-0.0162284	-0.015472	-0.0144343		86436	-0.00198407	-0.00205411	0.00139583	-0.00241367	-0.00197249	-0.00208424	-0.00241166	-0.00237495	-0.00197727	-0.0019638		86436	-0.00198398	-0.00205412	0.00155159	-0.00241367	-0.00197241	-0.00208425	-0.00241165	-0.00237499	-0.00197718	-0.00196372
86437	-0.0392295	-0.039751	-0.00499444	-0.0416223	-0.0386975	-0.0397883	-0.0417302	-0.0417949	-0.0392501	-0.0379869		86437	-0.0160844	-0.015868	-0.000851785	-0.0166995	-0.0156421	-0.0159208	-0.0167903	-0.0168321	-0.0160827	-0.0150408		86437	-0.00198407	-0.00205411	0.00138472	-0.00241367	-0.0019725	-0.00208424	-0.00241166	-0.00237495	-0.00197728	-0.00196381		86437	-0.00198398	-0.00205412	0.00155136	-0.00241367	-0.00197241	-0.00208425	-0.00241165	-0.00237499	-0.00197718	-0.00196372
86438	-0.0406204	-0.041155	-0.0058897	-0.0430738	-0.0400893	-0.0411912	-0.0431813	-0.0432461	-0.0406414	-0.0393798		86438	-0.0167025	-0.0164748	-0.00103525	-0.0173083	-0.0162586	-0.0165271	-0.0173994	-0.0174416	-0.0167006	-0.0156549		86438	-0.00198408	-0.00205411	0.00137321	-0.00241367	-0.0019725	-0.00208424	-0.00241166	-0.00237495	-0.00197728	-0.00196382		86438	-0.00198398	-0.00205412	0.00155112	-0.00241367	-0.00197241	-0.00208425	-0.00241165	-0.00237499	-0.00197718	-0.00196372
86439	-0.0420167	-0.0425644	-0.00698639	-0.04453	-0.0414867	-0.0425995	-0.0446372	-0.0447021	-0.0420382	-0.0407784		86439	-0.0173274	-0.0170885	-0.00122913	-0.0179226	-0.0168821	-0.0171404	-0.0180139	-0.0180565	-0.0173255	-0.0162762		86439	-0.00198409	-0.00205411	0.0013613	-0.00241367	-0.00197251	-0.00208424	-0.00241166	-0.00237495	-0.00197729	-0.00196382		86439	-0.00198398	-0.00205412	0.00155087	-0.00241367	-0.00197241	-0.00208425	-0.00241165	-0.00237499	-0.00197718	-0.00196372
86440	-0.043418	-0.0439786	-0.00832497	-0.0459906	-0.0428891	-0.0440125	-0.0460974	-0.0461624	-0.0434399	-0.042182		86440	-0.017959	-0.0177088	-0.00143395	-0.0185421	-0.0175123	-0.0177603	-0.0186336	-0.0186766	-0.0179571	-0.0169044		86440	-0.0019841	-0.00205411	0.00134899	-0.00241367	-0.00197252	-0.00208424	-0.00241166	-0.00237495	-0.0019773	-0.00196383		86440	-0.00198398	-0.00205412	0.00155062	-0.00241367	-0.00197241	-0.00208425	-0.00241165	-0.00237499	-0.00197718	-0.00196372
86441	-0.0448237	-0.0453972	-0.00972609	-0.0474552	-0.0442961	-0.04543	-0.0475615	-0.0476266	-0.0448461	-0.0435902		86441	-0.018597	-0.0183356	-0.00165032	-0.0191666	-0.0181491	-0.0183866	-0.0192583	-0.0193016	-0.018595	-0.0175392		86441	-0.00198411	-0.00205411	0.00133628	-0.00241367	-0.00197253	-0.00208424	-0.00241166	-0.00237495	-0.00197731	-0.00196384		86441	-0.00198398	-0.00205412	0.00155036	-0.00241367	-0.00197241	-0.00208425	-0.00241165	-0.00237499	-0.00197718	-0.00196372
86442	-0.0462336	-0.0468197	-0.0111262	-0.0489231	-0.0457072	-0.0468515	-0.0490291	-0.0490942	-0.0462564	-0.0450026		86442	-0.0192412	-0.0189685	-0.00187886	-0.0197958	-0.0187921	-0.0190191	-0.0198876	-0.0199313	-0.0192391	-0.0181804		86442	-0.00198412	-0.00205411	0.00132318	-0.00241367	-0.00197254	-0.00208424	-0.00241166	-0.00237495	-0.00197732	-0.00196385		86442	-0.00198398	-0.00205412	0.00155009	-0.00241367	-0.00197241	-0.00208425	-0.00241165	-0.00237499	-0.00197718	-0.00196372
86443	-0.0476472	-0.0482458	-0.0125226	-0.0503942	-0.047122	-0.0482765	-0.0504997	-0.0505649	-0.0476704	-0.0464188		86443	-0.0198912	-0.0196073	-0.00212025	-0.0204294	-0.019441	-0.0196575	-0.0205214	-0.0205654	-0.019889	-0.0188278		86443	-0.00198413	-0.00205411	0.00130968	-0.00241367	-0.00197254	-0.00208424	-0.00241166	-0.00237495	-0.00197733	-0.00196385		86443	-0.00198398	-0.00205412	0.00154981	-0.00241367	-0.00197241	-0.00208425	-0.00241165	-0.00237499	-0.00197718	-0.00196372
86444	-0.0490641	-0.0496751	-0.0139149	-0.0518679	-0.0485402	-0.0497047	-0.051973	-0.0520383	-0.0490877	-0.0478384		86444	-0.0205468	-0.0202518	-0.00237521	-0.0210673	-0.0200957	-0.0203015	-0.0211594	-0.0212037	-0.0205446	-0.019481		86444	-0.00198414	-0.00205411	0.00129578	-0.00241367	-0.00197255	-0.00208424	-0.00241166	-0.00237495	-0.00197734	-0.00196386		86444	-0.00198398	-0.00205412	0.00154952	-0.00241367	-0.00197241	-0.00208425	-0.00241165	-0.00237499	-0.00197718	-0.00196372
86445	-0.0504839	-0.0511072	-0.0153027	-0.053344	-0.0499613	-0.0511357	-0.0534487	-0.053514	-0.050508	-0.0492609		86445	-0.0212079	-0.0209018	-0.00264454	-0.0217092	-0.0207559	-0.020951	-0.0218014	-0.021846	-0.0212057	-0.0201398		86445	-0.00198415	-0.00205411	0.0012815	-0.00241367	-0.00197256	-0.00208424	-0.00241166	-0.00237495	-0.00197735	-0.00196387		86445	-0.00198398	-0.00205412	0.00154922	-0.00241367	-0.00197242	-0.00208425	-0.00241165	-0.00237499	-0.00197718	-0.00196372
86446	-0.0519063	-0.0525418	-0.0166859	-0.0548221	-0.0513851	-0.0525692	-0.0549263	-0.0549917	-0.0519309	-0.0506862		86446	-0.0218741	-0.021557	-0.0029291	-0.0223549	-0.0214214	-0.0216057	-0.0224471	-0.022492	-0.0218719	-0.0208039		86446	-0.00198416	-0.00205411	0.00126682	-0.00241367	-0.00197257	-0.00208424	-0.00241166	-0.00237495	-0.00197736	-0.00196388		86446	-0.00198398	-0.00205412	0.00154892	-0.00241367	-0.00197242	-0.00208425	-0.00241165	-0.00237499	-0.00197718	-0.00196372
86447	-0.053331	-0.0539786	-0.0180647	-0.0563019	-0.0528111	-0.0540049	-0.0564057	-0.0564711	-0.053356	-0.0521138		86447	-0.0225454	-0.0222172	-0.00322981	-0.0230041	-0.0220918	-0.0222654	-0.0230965	-0.0231416	-0.022543	-0.0214733		86447	-0.00198417	-0.00205411	0.00125175	-0.00241367	-0.00197258	-0.00208424	-0.00241166	-0.00237495	-0.00197737	-0.00196389		86447	-0.00198398	-0.00205412	0.0015486	-0.00241367	-0.00197242	-0.00208425	-0.00241165	-0.00237499	-0.00197718	-0.00196373
86448	-0.0547577	-0.0554172	-0.0194389	-0.057783	-0.0542392	-0.0554424	-0.0578864	-0.0579518	-0.0547831	-0.0535434		86448	-0.0232214	-0.0228822	-0.0035477	-0.0236568	-0.0227672	-0.0229299	-0.0237493	-0.0237947	-0.023219	-0.0221475		86448	-0.00198418	-0.00205411	0.00123629	-0.00241367	-0.00197259	-0.00208424	-0.00241166	-0.00237495	-0.00197738	-0.0019639		86448	-0.00198398	-0.00205412	0.00154828	-0.00241367	-0.00197242	-0.00208425	-0.00241165	-0.00237499	-0.00197718	-0.00196373
86449	-0.056186	-0.0568574	-0.0208086	-0.0592653	-0.055669	-0.0568815	-0.0593682	-0.0594337	-0.0562119	-0.0549748		86449	-0.0239019	-0.0235519	-0.00388387	-0.0243127	-0.0234471	-0.023599	-0.0244052	-0.0244509	-0.0238995	-0.0228265		86449	-0.00198419	-0.00205411	0.00122045	-0.00241367	-0.00197261	-0.00208424	-0.00241166	-0.00237495	-0.00197739	-0.00196391		86449	-0.00198398	-0.00205412	0.00154795	-0.00241367	-0.00197242	-0.00208425	-0.00241165	-0.00237499	-0.00197718	-0.00196373
86450	-0.0576158	-0.0582988	-0.0221737	-0.0607484	-0.0571002	-0.0583219	-0.0608508	-0.0609164	-0.0576421	-0.0564076		86450	-0.0245868	-0.0242259	-0.00423955	-0.0249717	-0.0241315	-0.0242725	-0.0250642	-0.0251101	-0.0245844	-0.02351		86450	-0.0019842	-0.00205411	0.00120422	-0.00241367	-0.00197262	-0.00208424	-0.00241166	-0.00237495	-0.0019774	-0.00196392		86450	-0.00198398	-0.00205412	0.00154762	-0.00241367	-0.00197242	-0.00208425	-0.00241165	-0.00237499	-0.00197718	-0.00196373
86451	-0.0590467	-0.0597413	-0.0235344	-0.0622321	-0.0585326	-0.0597634	-0.0623341	-0.0623996	-0.0590735	-0.0578416		86451	-0.0252759	-0.0249042	-0.00461604	-0.0256335	-0.0248201	-0.0249503	-0.0257261	-0.0257722	-0.0252734	-0.0241979		86451	-0.00198422	-0.00205411	0.00118762	-0.00241367	-0.00197263	-0.00208424	-0.00241166	-0.00237495	-0.00197742	-0.00196393		86451	-0.00198398	-0.00205412	0.00154727	-0.00241367	-0.00197242	-0.00208425	-0.00241165	-0.00237499	-0.00197718	-0.00196373
86452	-0.0604786	-0.0611846	-0.0248905	-0.0637161	-0.0599659	-0.0612056	-0.0638176	-0.0638832	-0.0605058	-0.0592766		86452	-0.0259689	-0.0255866	-0.00501481	-0.026298	-0.0255127	-0.0256321	-0.0263906	-0.026437	-0.0259664	-0.0248898		86452	-0.00198423	-0.00205411	0.00117063	-0.00241367	-0.00197264	-0.00208424	-0.00241166	-0.00237495	-0.00197743	-0.00196394		86452	-0.00198398	-0.00205412	0.00154692	-0.00241367	-0.00197242	-0.00208425	-0.00241165	-0.00237499	-0.00197718	-0.00196373
86453	-0.0619111	-0.0626285	-0.0262422	-0.0652002	-0.0613999	-0.0626484	-0.0653013	-0.0653669	-0.0619387	-0.0607123		86453	-0.0266658	-0.0262728	-0.00543752	-0.0269651	-0.0262093	-0.0263178	-0.0270577	-0.0271043	-0.0266633	-0.0255857		86453	-0.00198424	-0.00205411	0.00115327	-0.00241367	-0.00197265	-0.00208424	-0.00241166	-0.00237495	-0.00197744	-0.00196395		86453	-0.00198398	-0.00205412	0.00154656	-0.00241367	-0.00197242	-0.00208425	-0.00241165	-0.00237499	-0.00197718	-0.00196373
86454	-0.0633441	-0.0640727	-0.0275894	-0.0666843	-0.0628344	-0.0640915	-0.0667849	-0.0668505	-0.0633721	-0.0621484		86454	-0.0273663	-0.0269627	-0.00588589	-0.0276346	-0.0269095	-0.0270071	-0.0277272	-0.027774	-0.0273638	-0.0262854		86454	-0.00198426	-0.00205411	0.00113553	-0.00241367	-0.00197267	-0.00208425	-0.00241166	-0.00237495	-0.00197746	-0.00196397		86454	-0.00198398	-0.00205412	0.00154619	-0.00241366	-0.00197242	-0.00208425	-0.00241165	-0.00237499	-0.00197718	-0.00196373
86455	-0.0647773	-0.065517	-0.0289322	-0.068168	-0.0642691	-0.0655348	-0.0682682	-0.0683338	-0.0648058	-0.0635848		86455	-0.0280703	-0.0276562	-0.00636192	-0.0283063	-0.0276132	-0.0277001	-0.0283989	-0.028446	-0.0280678	-0.0269887		86455	-0.00198427	-0.00205411	0.00111742	-0.00241367	-0.00197268	-0.00208425	-0.00241166	-0.00237495	-0.00197747	-0.00196398		86455	-0.00198398	-0.00205412	0.00154581	-0.00241366	-0.00197242	-0.00208425	-0.00241165	-0.00237499	-0.00197718	-0.00196373
86456	-0.0662105	-0.0669612	-0.0302706	-0.0696513	-0.0657039	-0.066978	-0.069751	-0.0698166	-0.0662394	-0.0650213		86456	-0.0287776	-0.0283531	-0.00686791	-0.0289802	-0.0283203	-0.0283964	-0.0290727	-0.02912	-0.0287751	-0.0276954		86456	-0.00198429	-0.00205411	0.00109894	-0.00241367	-0.00197269	-0.00208425	-0.00241166	-0.00237495	-0.00197748	-0.00196399		86456	-0.00198398	-0.00205412	0.00154543	-0.00241366	-0.00197242	-0.00208425	-0.00241165	-0.00237499	-0.00197718	-0.00196373
86457	-0.0676436	-0.0684052	-0.0316047	-0.0711339	-0.0671385	-0.068421	-0.0712331	-0.0712988	-0.067673	-0.0664577		86457	-0.0294881	-0.0290533	-0.00740624	-0.029656	-0.0290306	-0.029096	-0.0297485	-0.029796	-0.0294856	-0.0284053		86457	-0.0019843	-0.00205411	0.00108009	-0.00241367	-0.00197271	-0.00208425	-0.00241166	-0.00237495	-0.0019775	-0.001964		86457	-0.00198398	-0.00205412	0.00154503	-0.00241366	-0.00197242	-0.00208425	-0.00241165	-0.00237499	-0.00197718	-0.00196373
86458	-0.0690764	-0.0698488	-0.0329343	-0.0726156	-0.0685728	-0.0698635	-0.0727144	-0.07278	-0.0691062	-0.0678938		86458	-0.0302016	-0.0297565	-0.00797959	-0.0303337	-0.029744	-0.0297986	-0.0304262	-0.0304738	-0.0301991	-0.0291184		86458	-0.00198432	-0.00205411	0.00106088	-0.00241367	-0.00197272	-0.00208425	-0.00241166	-0.00237495	-0.00197751	-0.00196402		86458	-0.00198398	-0.00205412	0.00154463	-0.00241366	-0.00197242	-0.00208425	-0.00241165	-0.00237499	-0.00197718	-0.00196373
86459	-0.0705087	-0.0712917	-0.0342597	-0.0740964	-0.0700066	-0.0713055	-0.0741947	-0.0742603	-0.0705389	-0.0693294		86459	-0.0309179	-0.0304627	-0.00859117	-0.0310131	-0.0304603	-0.0305042	-0.0311056	-0.0311534	-0.0309154	-0.0298345		86459	-0.00198433	-0.00205411	0.00104131	-0.00241367	-0.00197274	-0.00208425	-0.00241166	-0.00237495	-0.00197753	-0.00196403		86459	-0.00198398	-0.00205412	0.00154422	-0.00241366	-0.00197242	-0.00208425	-0.00241165	-0.00237499	-0.00197718	-0.00196373
86460	-0.0719403	-0.0727339	-0.0355808	-0.0755759	-0.0714398	-0.0727467	-0.0756738	-0.0757394	-0.0719709	-0.0707643		86460	-0.031637	-0.0311716	-0.00924462	-0.0316941	-0.0311793	-0.0312126	-0.0317865	-0.0318345	-0.0316345	-0.0305533		86460	-0.00198435	-0.00205411	0.00102138	-0.00241367	-0.00197275	-0.00208425	-0.00241166	-0.00237495	-0.00197754	-0.00196405		86460	-0.00198398	-0.00205412	0.00154381	-0.00241366	-0.00197242	-0.00208425	-0.00241165	-0.00237499	-0.00197718	-0.00196373
86461	-0.0733712	-0.0741752	-0.0368976	-0.0770542	-0.0728722	-0.0741869	-0.0771516	-0.0772172	-0.0734022	-0.0721984		86461	-0.0323587	-0.0318833	-0.00994406	-0.0323767	-0.031901	-0.0319237	-0.032469	-0.0325172	-0.0323562	-0.0312749		86461	-0.00198437	-0.00205411	0.00100109	-0.00241367	-0.00197277	-0.00208425	-0.00241166	-0.00237495	-0.00197756	-0.00196406		86461	-0.00198398	-0.00205412	0.00154338	-0.00241366	-0.00197242	-0.00208425	-0.00241165	-0.00237499	-0.00197718	-0.00196373
86462	-0.074801	-0.0756154	-0.0382101	-0.078531	-0.0743036	-0.0756261	-0.0786279	-0.0786935	-0.0748325	-0.0736316		86462	-0.0330828	-0.0325975	-0.0106942	-0.0330606	-0.0326251	-0.0326373	-0.0331528	-0.0332012	-0.0330803	-0.031999		86462	-0.00198438	-0.00205411	0.000980452	-0.00241367	-0.00197278	-0.00208425	-0.00241166	-0.00237495	-0.00197758	-0.00196408		86462	-0.00198398	-0.00205412	0.00154295	-0.00241366	-0.00197242	-0.00208425	-0.00241165	-0.00237499	-0.00197718	-0.00196373
86463	-0.0762298	-0.0770544	-0.0395184	-0.0800062	-0.0757339	-0.0770642	-0.0801027	-0.0801683	-0.0762616	-0.0750638		86463	-0.0338093	-0.0333141	-0.0115004	-0.0337457	-0.0333517	-0.0333533	-0.033838	-0.0338865	-0.0338068	-0.0327255		86463	-0.0019844	-0.00205411	0.000959462	-0.00241367	-0.0019728	-0.00208425	-0.00241166	-0.00237495	-0.00197759	-0.00196409		86463	-0.00198398	-0.00205412	0.00154252	-0.00241366	-0.00197242	-0.00208425	-0.00241165	-0.00237499	-0.00197718	-0.00196373
86464	-0.0776573	-0.078492	-0.0408226	-0.0814782	-0.077163	-0.0785008	-0.0815724	-0.0816354	-0.0776896	-0.0764946		86464	-0.0345379	-0.034033	-0.012369	-0.0344321	-0.0340804	-0.0340716	-0.0345242	-0.0345729	-0.0345355	-0.0334543		86464	-0.00198442	-0.00205411	0.000938125	-0.00241367	-0.00197282	-0.00208425	-0.00241166	-0.00237495	-0.00197761	-0.00196411		86464	-0.00198398	-0.00205412	0.00154207	-0.00241366	-0.00197242	-0.00208425	-0.00241165	-0.00237499	-0.00197718	-0.00196373
86465	-0.0790835	-0.0799283	-0.0421225	-0.0828915	-0.0785908	-0.0799361	-0.0829826	-0.0830439	-0.0791162	-0.0779242		86465	-0.0352687	-0.0347541	-0.0133075	-0.0351195	-0.0348113	-0.0347921	-0.0352116	-0.0352604	-0.0352662	-0.0341853		86465	-0.00198444	-0.00205411	0.000916443	-0.00241367	-0.00197284	-0.00208425	-0.00241166	-0.00237495	-0.00197763	-0.00196413		86465	-0.00198398	-0.00205412	0.00154162	-0.00241366	-0.00197242	-0.00208425	-0.00241165	-0.00237499	-0.00197718	-0.00196373
86466	-0.0805082	-0.0813551	-0.0434183	-0.0842962	-0.080017	-0.0813629	-0.0843868	-0.0844481	-0.0805413	-0.0793523		86466	-0.0360014	-0.0354772	-0.0143244	-0.035808	-0.0355442	-0.0355146	-0.0358999	-0.0359489	-0.035999	-0.0349183		86466	-0.00198445	-0.00205411	0.00089442	-0.00241367	-0.00197285	-0.00208425	-0.00241166	-0.00237495	-0.00197765	-0.00196414		86466	-0.00198398	-0.00205412	0.00154116	-0.00241366	-0.00197242	-0.00208425	-0.00241165	-0.00237499	-0.00197718	-0.00196373
86467	-0.0818962	-0.082725	-0.04471	-0.0856988	-0.081428	-0.082732	-0.0857889	-0.0858502	-0.0819279	-0.0807785		86467	-0.036736	-0.0362023	-0.0154297	-0.0364973	-0.036279	-0.0362391	-0.0365892	-0.0366383	-0.0367336	-0.0356532		86467	-0.00198447	-0.00205412	0.000872059	-0.00241367	-0.00197287	-0.00208425	-0.00241166	-0.00237495	-0.00197767	-0.00196416		86467	-0.00198398	-0.00205412	0.00154069	-0.00241366	-0.00197242	-0.00208425	-0.00241165	-0.00237499	-0.00197718	-0.00196373
86468	-0.0832525	-0.0840911	-0.0459976	-0.0870993	-0.0827866	-0.0840971	-0.087189	-0.0872502	-0.0832847	-0.0821551		86468	-0.0374723	-0.0369293	-0.0166338	-0.0371874	-0.0370155	-0.0369654	-0.0372792	-0.0373285	-0.03747	-0.03639		86468	-0.00198449	-0.00205412	0.000849362	-0.00241367	-0.00197289	-0.00208425	-0.00241166	-0.00237495	-0.00197768	-0.00196418		86468	-0.00198398	-0.00205412	0.00154022	-0.00241366	-0.00197242	-0.00208425	-0.00241165	-0.00237499	-0.00197718	-0.00196373
86469	-0.0846071	-0.0854553	-0.0472812	-0.0884976	-0.0841427	-0.0854604	-0.0885868	-0.088648	-0.0846396	-0.083513		86469	-0.0382103	-0.0376579	-0.0179366	-0.0378782	-0.0377537	-0.0376935	-0.0379699	-0.0380194	-0.038208	-0.0371284		86469	-0.00198451	-0.00205412	0.000826332	-0.00241367	-0.00197291	-0.00208425	-0.00241166	-0.00237495	-0.0019777	-0.00196419		86469	-0.00198398	-0.00205412	0.00153974	-0.00241366	-0.00197242	-0.00208425	-0.00241165	-0.00237499	-0.00197718	-0.00196373
86470	-0.0859597	-0.0868175	-0.0485606	-0.0898935	-0.0854969	-0.0868216	-0.0899823	-0.0900435	-0.0859927	-0.084869		86470	-0.0389498	-0.0383882	-0.01929	-0.0385697	-0.0384935	-0.0384232	-0.0386613	-0.0387109	-0.0389475	-0.0378685		86470	-0.00198453	-0.00205412	0.000802973	-0.00241367	-0.00197293	-0.00208425	-0.00241166	-0.00237495	-0.00197772	-0.00196421		86470	-0.00198398	-0.00205412	0.00153925	-0.00241366	-0.00197242	-0.00208425	-0.00241165	-0.00237499	-0.00197718	-0.00196373
86471	-0.0873104	-0.0881776	-0.0498361	-0.0912871	-0.0868491	-0.0881809	-0.0913754	-0.0914366	-0.0873438	-0.086223		86471	-0.0396908	-0.03912	-0.020651	-0.0392618	-0.0392348	-0.0391544	-0.0393533	-0.039403	-0.0396885	-0.0386101		86471	-0.00198455	-0.00205412	0.000779288	-0.00241367	-0.00197295	-0.00208425	-0.00241166	-0.00237495	-0.00197774	-0.00196423		86471	-0.00198398	-0.00205412	0.00153875	-0.00241366	-0.00197242	-0.00208425	-0.00241165	-0.00237499	-0.00197718	-0.00196373
86472	-0.088659	-0.0895357	-0.0511075	-0.0926782	-0.0881993	-0.089538	-0.0927661	-0.0928273	-0.0886928	-0.087575		86472	-0.0404331	-0.0398533	-0.0220111	-0.0399543	-0.0399774	-0.039887	-0.0400457	-0.0400956	-0.0404309	-0.039353		86472	-0.00198457	-0.00205412	0.00075528	-0.00241367	-0.00197297	-0.00208425	-0.00241166	-0.00237495	-0.00197776	-0.00196425		86472	-0.00198398	-0.00205412	0.00153825	-0.00241366	-0.00197242	-0.00208425	-0.00241165	-0.00237499	-0.00197718	-0.00196373
86473	-0.0900055	-0.0908914	-0.052375	-0.0940667	-0.0895474	-0.0908928	-0.0941542	-0.0942153	-0.0900397	-0.0889248		86473	-0.0411766	-0.0405879	-0.0233682	-0.0406473	-0.0407213	-0.040621	-0.0407386	-0.0407885	-0.0411745	-0.0400973		86473	-0.00198459	-0.00205412	0.000730951	-0.00241367	-0.00197299	-0.00208425	-0.00241166	-0.00237495	-0.00197779	-0.00196427		86473	-0.00198398	-0.00205412	0.00153774	-0.00241366	-0.00197242	-0.00208425	-0.00241165	-0.00237499	-0.00197719	-0.00196373
86474	-0.0913497	-0.0922449	-0.0536385	-0.0954527	-0.0908932	-0.0922454	-0.0955396	-0.0956008	-0.0913843	-0.0902725		86474	-0.0419214	-0.0413238	-0.0247218	-0.0413406	-0.0414664	-0.0413563	-0.0414318	-0.0414819	-0.0419193	-0.0408428		86474	-0.00198462	-0.00205412	0.000706305	-0.00241367	-0.00197301	-0.00208425	-0.00241166	-0.00237495	-0.00197781	-0.00196429		86474	-0.00198398	-0.00205412	0.00153723	-0.00241366	-0.00197242	-0.00208425	-0.00241165	-0.00237499	-0.00197719	-0.00196373
86475	-0.0926917	-0.093596	-0.0548981	-0.0968359	-0.0922367	-0.0935956	-0.0969224	-0.0969835	-0.0927267	-0.0916178		86475	-0.0426672	-0.0420608	-0.0260715	-0.0420342	-0.0422126	-0.0420927	-0.0421253	-0.0421755	-0.0426651	-0.0415894		86475	-0.00198464	-0.00205412	0.000681346	-0.00241367	-0.00197303	-0.00208425	-0.00241166	-0.00237495	-0.00197783	-0.00196431		86475	-0.00198398	-0.00205412	0.00153671	-0.00241366	-0.00197242	-0.00208425	-0.00241165	-0.00237499	-0.00197719	-0.00196373
86476	-0.0940313	-0.0949447	-0.0561538	-0.0982163	-0.0935779	-0.0949433	-0.0983024	-0.0983635	-0.0940667	-0.0929607		86476	-0.043414	-0.0427989	-0.0274172	-0.042728	-0.0429598	-0.0428302	-0.042819	-0.0428693	-0.043412	-0.0423371		86476	-0.00198466	-0.00205412	0.000656075	-0.00241367	-0.00197305	-0.00208425	-0.00241166	-0.00237495	-0.00197785	-0.00196433		86476	-0.00198398	-0.00205412	0.00153618	-0.00241366	-0.00197242	-0.00208425	-0.00241165	-0.00237499	-0.00197719	-0.00196373
86477	-0.0953685	-0.0962908	-0.0574056	-0.099594	-0.0949166	-0.0962885	-0.0996796	-0.0997406	-0.0954042	-0.0943013		86477	-0.0441617	-0.0435381	-0.0287587	-0.043422	-0.043708	-0.0435687	-0.0435128	-0.0435633	-0.0441598	-0.0430857		86477	-0.00198468	-0.00205412	0.000630497	-0.00241367	-0.00197307	-0.00208425	-0.00241166	-0.00237495	-0.00197787	-0.00196435		86477	-0.00198399	-0.00205412	0.00153565	-0.00241366	-0.00197242	-0.00208425	-0.00241165	-0.00237499	-0.00197719	-0.00196373
86478	-0.0967032	-0.0976344	-0.0586536	-0.100969	-0.0962528	-0.0976312	-0.101054	-0.101115	-0.0967393	-0.0956393		86478	-0.0449102	-0.0442781	-0.0300961	-0.0441161	-0.0444569	-0.0443081	-0.0442068	-0.0442574	-0.0449084	-0.0438352		86478	-0.00198471	-0.00205412	0.000604614	-0.00241367	-0.0019731	-0.00208425	-0.00241166	-0.00237495	-0.0019779	-0.00196438		86478	-0.00198399	-0.00205412	0.00153511	-0.00241366	-0.00197242	-0.00208425	-0.00241165	-0.00237499	-0.00197719	-0.00196373
86479	-0.0980353	-0.0989753	-0.0598977	-0.102341	-0.0975865	-0.0989712	-0.102425	-0.102486	-0.0980718	-0.0969747		86479	-0.0456595	-0.045019	-0.0314292	-0.0448102	-0.0452067	-0.0450484	-0.0449008	-0.0449515	-0.0456577	-0.0445855		86479	-0.00198473	-0.00205412	0.00057843	-0.00241367	-0.00197312	-0.00208425	-0.00241166	-0.00237495	-0.00197792	-0.0019644		86479	-0.00198399	-0.00205412	0.00153456	-0.00241366	-0.00197242	-0.00208425	-0.00241165	-0.00237499	-0.00197719	-0.00196373
86480	-0.0993648	-0.100313	-0.061138	-0.103709	-0.0989175	-0.100309	-0.103794	-0.103855	-0.0994017	-0.0983075		86480	-0.0464095	-0.0457606	-0.0327582	-0.0455044	-0.0459572	-0.0457894	-0.0455948	-0.0456456	-0.0464078	-0.0453365		86480	-0.00198476	-0.00205412	0.000551947	-0.00241368	-0.00197314	-0.00208425	-0.00241166	-0.00237495	-0.00197794	-0.00196442		86480	-0.00198399	-0.00205412	0.001534	-0.00241366	-0.00197242	-0.00208425	-0.00241165	-0.00237499	-0.00197719	-0.00196373
86481	-0.100692	-0.101649	-0.0623745	-0.105075	-0.100246	-0.101643	-0.105159	-0.10522	-0.100729	-0.0996377		86481	-0.0471601	-0.046503	-0.0340829	-0.0461984	-0.0467082	-0.0465312	-0.0462887	-0.0463396	-0.0471584	-0.0460882		86481	-0.00198478	-0.00205412	0.000525169	-0.00241368	-0.00197317	-0.00208425	-0.00241166	-0.00237495	-0.00197797	-0.00196444		86481	-0.00198399	-0.00205412	0.00153344	-0.00241366	-0.00197242	-0.00208425	-0.00241165	-0.00237499	-0.00197719	-0.00196373
86482	-0.102016	-0.102982	-0.0636073	-0.106438	-0.101572	-0.102975	-0.106521	-0.106582	-0.102053	-0.100965		86482	-0.0479112	-0.047246	-0.0354034	-0.0468923	-0.0474599	-0.0472735	-0.0469825	-0.0470335	-0.0479096	-0.0468404		86482	-0.0019848	-0.00205412	0.000498099	-0.00241368	-0.00197319	-0.00208426	-0.00241166	-0.00237495	-0.00197799	-0.00196447		86482	-0.00198399	-0.00205412	0.00153288	-0.00241366	-0.00197242	-0.00208425	-0.00241165	-0.00237499	-0.00197719	-0.00196373
86483	-0.103337	-0.104311	-0.0648363	-0.107797	-0.102894	-0.104304	-0.10788	-0.107941	-0.103375	-0.10229		86483	-0.0486628	-0.0479895	-0.0367198	-0.0475861	-0.048212	-0.0480165	-0.0476761	-0.0477272	-0.0486612	-0.0475931		86483	-0.00198483	-0.00205412	0.00047074	-0.00241368	-0.00197321	-0.00208426	-0.00241166	-0.00237495	-0.00197801	-0.00196449		86483	-0.00198399	-0.00205412	0.00153231	-0.00241366	-0.00197242	-0.00208425	-0.00241165	-0.00237499	-0.00197719	-0.00196373
86484	-0.104655	-0.105638	-0.0660615	-0.109154	-0.104214	-0.10563	-0.109236	-0.109297	-0.104694	-0.103611		86484	-0.0494147	-0.0487335	-0.0380319	-0.0482797	-0.0489645	-0.0487599	-0.0483695	-0.0484208	-0.0494133	-0.0483463		86484	-0.00198486	-0.00205412	0.000443096	-0.00241368	-0.00197324	-0.00208426	-0.00241166	-0.00237495	-0.00197804	-0.00196451		86484	-0.00198399	-0.00205412	0.00153173	-0.00241366	-0.00197242	-0.00208425	-0.00241165	-0.00237499	-0.00197719	-0.00196373
86485	-0.105971	-0.106962	-0.0672831	-0.110507	-0.105532	-0.106953	-0.110589	-0.11065	-0.10601	-0.10493		86485	-0.0501671	-0.049478	-0.0393399	-0.048973	-0.0497174	-0.0495037	-0.0490627	-0.049114	-0.0501657	-0.0490998		86485	-0.00198488	-0.00205412	0.000415169	-0.00241368	-0.00197326	-0.00208426	-0.00241166	-0.00237495	-0.00197807	-0.00196454		86485	-0.00198399	-0.00205412	0.00153115	-0.00241366	-0.00197242	-0.00208425	-0.00241165	-0.00237499	-0.00197719	-0.00196373
86486	-0.107284	-0.108283	-0.068501	-0.111857	-0.106846	-0.108273	-0.111938	-0.111999	-0.107323	-0.106246		86486	-0.0509197	-0.0502228	-0.0406438	-0.049666	-0.0504706	-0.0502479	-0.0497556	-0.049807	-0.0509184	-0.0498537		86486	-0.00198491	-0.00205412	0.000386961	-0.00241368	-0.00197329	-0.00208426	-0.00241166	-0.00237495	-0.00197809	-0.00196456		86486	-0.00198399	-0.00205412	0.00153056	-0.00241366	-0.00197242	-0.00208425	-0.00241165	-0.00237499	-0.00197719	-0.00196373
86487	-0.108594	-0.109601	-0.0697152	-0.113203	-0.108157	-0.10959	-0.113285	-0.113345	-0.108633	-0.107559		86487	-0.0516725	-0.0509679	-0.0419435	-0.0503587	-0.051224	-0.0509924	-0.0504481	-0.0504996	-0.0516713	-0.0506078		86487	-0.00198493	-0.00205412	0.000358477	-0.00241368	-0.00197332	-0.00208426	-0.00241166	-0.00237495	-0.00197812	-0.00196459		86487	-0.00198399	-0.00205412	0.00152996	-0.00241366	-0.00197242	-0.00208425	-0.00241165	-0.00237499	-0.00197719	-0.00196373
86488	-0.1099	-0.110916	-0.0709258	-0.114547	-0.109465	-0.110904	-0.114628	-0.114688	-0.10994	-0.108869		86488	-0.0524255	-0.0517133	-0.0432392	-0.051051	-0.0519775	-0.0517372	-0.0511402	-0.0511918	-0.0524243	-0.051362		86488	-0.00198496	-0.00205412	0.00032972	-0.00241368	-0.00197334	-0.00208426	-0.00241166	-0.00237495	-0.00197814	-0.00196461		86488	-0.00198399	-0.00205412	0.00152936	-0.00241366	-0.00197242	-0.00208425	-0.00241165	-0.00237499	-0.00197719	-0.00196373
86489	-0.111204	-0.112228	-0.0721327	-0.115887	-0.110771	-0.112215	-0.115967	-0.116028	-0.111244	-0.110176		86489	-0.0531785	-0.0524588	-0.0445307	-0.0517429	-0.0527312	-0.0524821	-0.051832	-0.0518836	-0.0531775	-0.0521165		86489	-0.00198499	-0.00205412	0.000300692	-0.00241368	-0.00197337	-0.00208426	-0.00241166	-0.00237495	-0.00197817	-0.00196464		86489	-0.00198399	-0.00205412	0.00152875	-0.00241366	-0.00197242	-0.00208425	-0.00241165	-0.00237499	-0.00197719	-0.00196373
86490	-0.112505	-0.113537	-0.0733361	-0.117223	-0.112073	-0.113523	-0.117303	-0.117364	-0.112546	-0.11148		86490	-0.0539317	-0.0532045	-0.0458182	-0.0524343	-0.053485	-0.0532272	-0.0525232	-0.052575	-0.0539307	-0.0528709		86490	-0.00198502	-0.00205413	0.000271397	-0.00241368	-0.0019734	-0.00208426	-0.00241166	-0.00237495	-0.0019782	-0.00196467		86490	-0.00198399	-0.00205412	0.00152814	-0.00241366	-0.00197242	-0.00208425	-0.00241165	-0.00237499	-0.00197719	-0.00196373
86491	-0.113803	-0.114842	-0.0745359	-0.118557	-0.113372	-0.114828	-0.118636	-0.118697	-0.113844	-0.112781		86491	-0.0546848	-0.0539503	-0.0471016	-0.0531252	-0.0542387	-0.0539724	-0.053214	-0.0532659	-0.0546839	-0.0536254		86491	-0.00198505	-0.00205413	0.000241837	-0.00241368	-0.00197342	-0.00208426	-0.00241166	-0.00237495	-0.00197823	-0.00196469		86491	-0.00198399	-0.00205412	0.00152752	-0.00241366	-0.00197242	-0.00208425	-0.00241165	-0.00237499	-0.00197719	-0.00196373
86492	-0.115097	-0.116145	-0.0757321	-0.119886	-0.114668	-0.11613	-0.119965	-0.120026	-0.115138	-0.114079		86492	-0.0554378	-0.054696	-0.048381	-0.0538156	-0.0549924	-0.0547176	-0.0539042	-0.0539562	-0.0554371	-0.0543799		86492	-0.00198507	-0.00205413	0.000212017	-0.00241368	-0.00197345	-0.00208426	-0.00241166	-0.00237495	-0.00197825	-0.00196472		86492	-0.00198399	-0.00205412	0.0015269	-0.00241366	-0.00197242	-0.00208425	-0.00241165	-0.00237499	-0.00197719	-0.00196373
86493	-0.116388	-0.117444	-0.0769248	-0.121213	-0.115961	-0.117428	-0.121291	-0.121352	-0.11643	-0.115374		86493	-0.0561908	-0.0554418	-0.0496564	-0.0545054	-0.055746	-0.0554627	-0.0545939	-0.0546459	-0.0561901	-0.0551343		86493	-0.0019851	-0.00205413	0.000181938	-0.00241368	-0.00197348	-0.00208426	-0.00241166	-0.00237495	-0.00197828	-0.00196475		86493	-0.00198399	-0.00205412	0.00152627	-0.00241366	-0.00197242	-0.00208425	-0.00241165	-0.00237499	-0.00197719	-0.00196373
86494	-0.117677	-0.11874	-0.0780873	-0.122535	-0.117251	-0.118723	-0.122614	-0.122674	-0.117719	-0.116665		86494	-0.0569436	-0.0561875	-0.0509278	-0.0551947	-0.0564995	-0.0562078	-0.055283	-0.0553351	-0.056943	-0.0558885		86494	-0.00198513	-0.00205413	0.000151604	-0.00241368	-0.00197351	-0.00208426	-0.00241166	-0.00237495	-0.00197831	-0.00196478		86494	-0.00198399	-0.00205412	0.00152564	-0.00241366	-0.00197242	-0.00208425	-0.00241165	-0.00237499	-0.00197719	-0.00196373
86495	-0.118962	-0.120032	-0.0792075	-0.123855	-0.118537	-0.120015	-0.123933	-0.123993	-0.119004	-0.117953		86495	-0.0576962	-0.0569331	-0.0521953	-0.0558833	-0.0572527	-0.0569528	-0.0559715	-0.0560237	-0.0576957	-0.0566426		86495	-0.00198516	-0.00205413	0.000121018	-0.00241368	-0.00197354	-0.00208426	-0.00241166	-0.00237495	-0.00197834	-0.0019648		86495	-0.00198399	-0.00205412	0.001525	-0.00241366	-0.00197243	-0.00208425	-0.00241165	-0.00237499	-0.00197719	-0.00196373
86496	-0.120244	-0.121322	-0.0803246	-0.125171	-0.11982	-0.121303	-0.125248	-0.125309	-0.120286	-0.119238		86496	-0.0584485	-0.0576785	-0.0534588	-0.0565713	-0.0580057	-0.0576976	-0.0566593	-0.0567116	-0.0584481	-0.0573964		86496	-0.00198519	-0.00205413	9.01829e-05	-0.00241368	-0.00197357	-0.00208426	-0.00241166	-0.00237495	-0.00197837	-0.00196483		86496	-0.00198399	-0.00205412	0.00152435	-0.00241366	-0.00197243	-0.00208425	-0.00241165	-0.00237499	-0.00197719	-0.00196373
86497	-0.121522	-0.122608	-0.0814383	-0.126483	-0.1211	-0.122589	-0.12656	-0.12662	-0.121565	-0.12052		86497	-0.0592006	-0.0584237	-0.0547184	-0.0572586	-0.0587585	-0.0584422	-0.0573464	-0.0573988	-0.0592003	-0.05815		86497	-0.00198522	-0.00205413	5.91017e-05	-0.00241368	-0.0019736	-0.00208426	-0.00241166	-0.00237495	-0.0019784	-0.00196486		86497	-0.00198399	-0.00205412	0.0015237	-0.00241366	-0.00197243	-0.00208425	-0.00241165	-0.00237499	-0.00197719	-0.00196374
86498	-0.122797	-0.123891	-0.0825485	-0.127792	-0.122377	-0.123871	-0.127869	-0.127929	-0.122841	-0.121798		86498	-0.0599523	-0.0591686	-0.0559742	-0.0579452	-0.0595109	-0.0591865	-0.0580329	-0.0580853	-0.0599521	-0.0589033		86498	-0.00198525	-0.00205413	2.77773e-05	-0.00241368	-0.00197363	-0.00208426	-0.00241166	-0.00237495	-0.00197843	-0.00196489		86498	-0.00198399	-0.00205412	0.00152305	-0.00241366	-0.00197243	-0.00208425	-0.00241165	-0.00237499	-0.00197719	-0.00196374
86499	-0.124069	-0.12517	-0.0836553	-0.129097	-0.123651	-0.125149	-0.129173	-0.129234	-0.124113	-0.123074		86499	-0.0607036	-0.0599132	-0.057226	-0.058631	-0.0602629	-0.0599306	-0.0587186	-0.0587711	-0.0607035	-0.0596561		86499	-0.00198529	-0.00205413	-3.78719e-06	-0.00241368	-0.00197366	-0.00208426	-0.00241166	-0.00237495	-0.00197846	-0.00196492		86499	-0.00198399	-0.00205412	0.00152239	-0.00241366	-0.00197243	-0.00208425	-0.00241165	-0.00237499	-0.00197719	-0.00196374
86500	-0.125338	-0.126446	-0.0847587	-0.130399	-0.124921	-0.126425	-0.130475	-0.130535	-0.125382	-0.124345		86500	-0.0614545	-0.0606576	-0.058474	-0.0593161	-0.0610146	-0.0606743	-0.0594035	-0.0594561	-0.0614545	-0.0604086		86500	-0.00198532	-0.00205413	-3.55889e-05	-0.00241368	-0.00197369	-0.00208427	-0.00241166	-0.00237495	-0.00197849	-0.00196495		86500	-0.00198399	-0.00205412	0.00152172	-0.00241366	-0.00197243	-0.00208425	-0.00241165	-0.00237499	-0.00197719	-0.00196374
86501	-0.126604	-0.127719	-0.0858587	-0.131697	-0.126188	-0.127697	-0.131772	-0.131832	-0.126648	-0.125614		86501	-0.062205	-0.0614015	-0.0597182	-0.0600004	-0.0617657	-0.0614177	-0.0600877	-0.0601403	-0.0622051	-0.0611607		86501	-0.00198535	-0.00205413	-6.76249e-05	-0.00241368	-0.00197372	-0.00208427	-0.00241166	-0.00237495	-0.00197852	-0.00196498		86501	-0.00198399	-0.00205412	0.00152105	-0.00241366	-0.00197243	-0.00208425	-0.00241165	-0.00237499	-0.00197719	-0.00196374
86502	-0.127866	-0.128988	-0.0869554	-0.132991	-0.127451	-0.128965	-0.133066	-0.133126	-0.127911	-0.126879		86502	-0.062955	-0.062145	-0.0609586	-0.060684	-0.0625164	-0.0621606	-0.060771	-0.0608237	-0.0629552	-0.0619123		86502	-0.00198538	-0.00205413	-9.98923e-05	-0.00241368	-0.00197375	-0.00208427	-0.00241166	-0.00237495	-0.00197855	-0.00196501		86502	-0.00198399	-0.00205412	0.00152037	-0.00241366	-0.00197243	-0.00208425	-0.00241165	-0.00237499	-0.00197719	-0.00196374
86503	-0.129125	-0.130254	-0.0880488	-0.134282	-0.128712	-0.13023	-0.134357	-0.134417	-0.12917	-0.128141		86503	-0.0637044	-0.0628881	-0.0621952	-0.0613667	-0.0632666	-0.0629031	-0.0614535	-0.0615063	-0.0637047	-0.0626633		86503	-0.00198542	-0.00205413	-0.000132388	-0.00241368	-0.00197378	-0.00208427	-0.00241166	-0.00237495	-0.00197859	-0.00196504		86503	-0.00198399	-0.00205412	0.00151969	-0.00241366	-0.00197243	-0.00208425	-0.00241165	-0.00237499	-0.00197719	-0.00196374
86504	-0.13038	-0.131517	-0.0891389	-0.13557	-0.129968	-0.131492	-0.135644	-0.135704	-0.130426	-0.1294		86504	-0.0644533	-0.0636306	-0.063428	-0.0620485	-0.0640162	-0.0636451	-0.0621352	-0.0621881	-0.0644537	-0.0634138		86504	-0.00198545	-0.00205413	-0.00016511	-0.00241368	-0.00197382	-0.00208427	-0.00241166	-0.00237495	-0.00197862	-0.00196508		86504	-0.00198399	-0.00205412	0.00151901	-0.00241366	-0.00197243	-0.00208425	-0.00241165	-0.00237499	-0.00197719	-0.00196374
86505	-0.131632	-0.132776	-0.0902256	-0.136853	-0.131222	-0.132751	-0.136927	-0.136987	-0.131678	-0.130655		86505	-0.0652015	-0.0643727	-0.0646571	-0.0627295	-0.0647652	-0.0643865	-0.062816	-0.062869	-0.0652021	-0.0641638		86505	-0.00198548	-0.00205413	-0.000198054	-0.00241368	-0.00197385	-0.00208427	-0.00241166	-0.00237495	-0.00197865	-0.00196511		86505	-0.00198399	-0.00205412	0.00151832	-0.00241366	-0.00197243	-0.00208425	-0.00241165	-0.00237499	-0.00197719	-0.00196374
86506	-0.132881	-0.134031	-0.0913091	-0.138133	-0.132472	-0.134006	-0.138207	-0.138267	-0.132927	-0.131906		86506	-0.0659492	-0.0651142	-0.0658825	-0.0634096	-0.0655136	-0.0651274	-0.063496	-0.063549	-0.0659499	-0.0649131		86506	-0.00198552	-0.00205414	-0.000231218	-0.00241368	-0.00197388	-0.00208427	-0.00241166	-0.00237495	-0.00197868	-0.00196514		86506	-0.00198399	-0.00205412	0.00151763	-0.00241366	-0.00197243	-0.00208425	-0.00241165	-0.00237499	-0.0019772	-0.00196374
86507	-0.134126	-0.135284	-0.0923893	-0.13941	-0.133719	-0.135257	-0.139483	-0.139543	-0.134173	-0.133155		86507	-0.0666962	-0.0658551	-0.0671041	-0.0640888	-0.0662614	-0.0658678	-0.064175	-0.064228	-0.0666969	-0.0656617		86507	-0.00198555	-0.00205414	-0.000264599	-0.00241368	-0.00197391	-0.00208427	-0.00241166	-0.00237495	-0.00197872	-0.00196517		86507	-0.00198399	-0.00205412	0.00151693	-0.00241366	-0.00197243	-0.00208425	-0.00241165	-0.00237499	-0.0019772	-0.00196374
86508	-0.135368	-0.136532	-0.0934663	-0.140682	-0.134962	-0.136505	-0.140755	-0.140815	-0.135415	-0.1344		86508	-0.0674424	-0.0665953	-0.0683221	-0.064767	-0.0670084	-0.0666075	-0.0648531	-0.0649062	-0.0674433	-0.0664097		86508	-0.00198558	-0.00205414	-0.000298194	-0.00241368	-0.00197395	-0.00208427	-0.00241166	-0.00237495	-0.00197875	-0.00196521		86508	-0.00198399	-0.00205412	0.00151622	-0.00241366	-0.00197243	-0.00208425	-0.00241165	-0.00237499	-0.0019772	-0.00196374
86509	-0.136607	-0.137778	-0.0945401	-0.141952	-0.136202	-0.13775	-0.142024	-0.142084	-0.136654	-0.135641		86509	-0.068188	-0.067335	-0.0695365	-0.0654444	-0.0677547	-0.0673465	-0.0655303	-0.0655834	-0.068189	-0.0671569		86509	-0.00198562	-0.00205414	-0.000332001	-0.00241368	-0.00197398	-0.00208427	-0.00241166	-0.00237495	-0.00197879	-0.00196524		86509	-0.001984	-0.00205412	0.00151552	-0.00241366	-0.00197243	-0.00208425	-0.00241165	-0.00237499	-0.0019772	-0.00196374
86510	-0.137842	-0.13902	-0.0956107	-0.143217	-0.137439	-0.138991	-0.143289	-0.143349	-0.137889	-0.136879		86510	-0.0689328	-0.0680739	-0.0707472	-0.0661207	-0.0685003	-0.0680849	-0.0662065	-0.0662597	-0.0689339	-0.0679034		86510	-0.00198565	-0.00205414	-0.000366017	-0.00241368	-0.00197402	-0.00208427	-0.00241166	-0.00237495	-0.00197882	-0.00196527		86510	-0.001984	-0.00205412	0.0015148	-0.00241366	-0.00197243	-0.00208425	-0.00241165	-0.00237499	-0.0019772	-0.00196374
86511	-0.139073	-0.140258	-0.096678	-0.144479	-0.138672	-0.140229	-0.14455	-0.14461	-0.139121	-0.138114		86511	-0.0696768	-0.0688122	-0.0719543	-0.0667961	-0.0692451	-0.0688226	-0.0668817	-0.066935	-0.0696781	-0.0686492		86511	-0.00198569	-0.00205414	-0.000400238	-0.00241368	-0.00197405	-0.00208427	-0.00241166	-0.00237495	-0.00197886	-0.00196531		86511	-0.001984	-0.00205412	0.00151409	-0.00241366	-0.00197243	-0.00208425	-0.00241165	-0.00237499	-0.0019772	-0.00196374
86512	-0.140302	-0.141493	-0.0977422	-0.145737	-0.139901	-0.141463	-0.145808	-0.145868	-0.14035	-0.139345		86512	-0.07042	-0.0695497	-0.0731578	-0.0674705	-0.0699891	-0.0695595	-0.0675559	-0.0676093	-0.0704214	-0.0693941		86512	-0.00198573	-0.00205414	-0.000434663	-0.00241368	-0.00197409	-0.00208427	-0.00241166	-0.00237495	-0.00197889	-0.00196534		86512	-0.001984	-0.00205412	0.00151336	-0.00241366	-0.00197243	-0.00208425	-0.00241165	-0.00237499	-0.0019772	-0.00196374
86513	-0.141527	-0.142725	-0.0988033	-0.146992	-0.141128	-0.142694	-0.147062	-0.147122	-0.141575	-0.140573		86513	-0.0711624	-0.0702864	-0.0743577	-0.0681439	-0.0707322	-0.0702957	-0.0682292	-0.0682826	-0.0711639	-0.0701382		86513	-0.00198576	-0.00205414	-0.000469288	-0.00241368	-0.00197412	-0.00208427	-0.00241166	-0.00237495	-0.00197893	-0.00196538		86513	-0.001984	-0.00205412	0.00151264	-0.00241366	-0.00197243	-0.00208425	-0.00241165	-0.00237499	-0.0019772	-0.00196374
86514	-0.142748	-0.143953	-0.0998612	-0.148243	-0.14235	-0.143921	-0.148313	-0.148372	-0.142797	-0.141797		86514	-0.0719039	-0.0710223	-0.0755541	-0.0688163	-0.0714745	-0.0710311	-0.0689014	-0.0689549	-0.0719055	-0.0708815		86514	-0.0019858	-0.00205414	-0.000504111	-0.00241368	-0.00197416	-0.00208427	-0.00241166	-0.00237495	-0.00197896	-0.00196541		86514	-0.001984	-0.00205412	0.00151191	-0.00241366	-0.00197243	-0.00208425	-0.00241165	-0.00237499	-0.0019772	-0.00196374
86515	-0.143966	-0.145177	-0.100916	-0.14949	-0.14357	-0.145145	-0.14956	-0.149619	-0.144015	-0.143018		86515	-0.0726445	-0.0717574	-0.0767469	-0.0694877	-0.0722159	-0.0717656	-0.0695726	-0.0696261	-0.0726462	-0.0716238		86515	-0.00198584	-0.00205414	-0.000539129	-0.00241368	-0.00197419	-0.00208428	-0.00241166	-0.00237495	-0.001979	-0.00196545		86515	-0.001984	-0.00205412	0.00151118	-0.00241366	-0.00197243	-0.00208425	-0.00241165	-0.00237499	-0.0019772	-0.00196374
86516	-0.145181	-0.146398	-0.101968	-0.150733	-0.144786	-0.146365	-0.150803	-0.150862	-0.14523	-0.144236		86516	-0.0733842	-0.0724917	-0.0779193	-0.070158	-0.0729564	-0.0724994	-0.0702427	-0.0702963	-0.0733861	-0.0723653		86516	-0.00198587	-0.00205414	-0.00057434	-0.00241368	-0.00197423	-0.00208428	-0.00241166	-0.00237496	-0.00197903	-0.00196549		86516	-0.001984	-0.00205412	0.00151044	-0.00241366	-0.00197243	-0.00208425	-0.00241165	-0.00237499	-0.0019772	-0.00196374
86517	-0.146392	-0.147616	-0.103016	-0.151973	-0.145998	-0.147582	-0.152043	-0.152102	-0.146442	-0.14545		86517	-0.0741229	-0.0732251	-0.0790398	-0.0708273	-0.073696	-0.0732322	-0.0709118	-0.0709655	-0.0741249	-0.0731059		86517	-0.00198591	-0.00205414	-0.00060974	-0.00241368	-0.00197427	-0.00208428	-0.00241166	-0.00237496	-0.00197907	-0.00196552		86517	-0.001984	-0.00205412	0.00150969	-0.00241366	-0.00197243	-0.00208425	-0.00241165	-0.00237499	-0.0019772	-0.00196374
86518	-0.1476	-0.14883	-0.104062	-0.15321	-0.147207	-0.148796	-0.153279	-0.153338	-0.14765	-0.146661		86518	-0.0748607	-0.0739577	-0.0801571	-0.0714955	-0.0744346	-0.0739642	-0.0715798	-0.0716336	-0.0748629	-0.0738455		86518	-0.00198595	-0.00205414	-0.000645328	-0.00241368	-0.0019743	-0.00208428	-0.00241166	-0.00237496	-0.00197911	-0.00196556		86518	-0.001984	-0.00205412	0.00150895	-0.00241366	-0.00197243	-0.00208425	-0.00241165	-0.00237499	-0.0019772	-0.00196374
86519	-0.148804	-0.150041	-0.105104	-0.154442	-0.148413	-0.150006	-0.154511	-0.15457	-0.148854	-0.147868		86519	-0.0755976	-0.0746893	-0.0812709	-0.0721626	-0.0751722	-0.0746953	-0.0722468	-0.0723006	-0.0755998	-0.0745841		86519	-0.00198599	-0.00205414	-0.0006811	-0.00241368	-0.00197434	-0.00208428	-0.00241166	-0.00237496	-0.00197915	-0.0019656		86519	-0.001984	-0.00205412	0.0015082	-0.00241366	-0.00197243	-0.00208425	-0.00241165	-0.00237499	-0.0019772	-0.00196374
86520	-0.150005	-0.151248	-0.106144	-0.155671	-0.149615	-0.151212	-0.155739	-0.155799	-0.150056	-0.149072		86520	-0.0763334	-0.0754199	-0.0823812	-0.0728287	-0.0759089	-0.0754254	-0.0729127	-0.0729665	-0.0763358	-0.0753217		86520	-0.00198603	-0.00205415	-0.000717055	-0.00241368	-0.00197438	-0.00208428	-0.00241166	-0.00237496	-0.00197918	-0.00196563		86520	-0.001984	-0.00205412	0.00150744	-0.00241366	-0.00197243	-0.00208425	-0.00241165	-0.00237499	-0.0019772	-0.00196374
86521	-0.151202	-0.152452	-0.10718	-0.156897	-0.150814	-0.152415	-0.156964	-0.157024	-0.151253	-0.150272		86521	-0.0770682	-0.0761497	-0.0834882	-0.0734936	-0.0766445	-0.0761546	-0.0735775	-0.0736314	-0.0770707	-0.0760583		86521	-0.00198606	-0.00205415	-0.000753189	-0.00241368	-0.00197442	-0.00208428	-0.00241166	-0.00237496	-0.00197922	-0.00196567		86521	-0.001984	-0.00205412	0.00150669	-0.00241366	-0.00197244	-0.00208425	-0.00241165	-0.00237499	-0.0019772	-0.00196374
86522	-0.152397	-0.153652	-0.108214	-0.158118	-0.152009	-0.153615	-0.158186	-0.158245	-0.152448	-0.151469		86522	-0.077802	-0.0768784	-0.0845918	-0.0741575	-0.0773791	-0.0768828	-0.0742411	-0.0742951	-0.0778046	-0.0767939		86522	-0.0019861	-0.00205415	-0.000789499	-0.00241368	-0.00197446	-0.00208428	-0.00241166	-0.00237496	-0.00197926	-0.00196571		86522	-0.001984	-0.00205412	0.00150592	-0.00241366	-0.00197244	-0.00208425	-0.00241165	-0.00237499	-0.0019772	-0.00196375
86523	-0.153587	-0.154849	-0.109244	-0.159337	-0.153201	-0.154811	-0.159404	-0.159463	-0.153639	-0.152662		86523	-0.0785347	-0.0776062	-0.085692	-0.0748202	-0.0781126	-0.07761	-0.0749037	-0.0749577	-0.0785375	-0.0775284		86523	-0.00198614	-0.00205415	-0.000825985	-0.00241368	-0.0019745	-0.00208428	-0.00241166	-0.00237496	-0.0019793	-0.00196575		86523	-0.001984	-0.00205412	0.00150516	-0.00241366	-0.00197244	-0.00208425	-0.00241165	-0.00237499	-0.0019772	-0.00196375
86524	-0.154774	-0.156042	-0.110271	-0.160551	-0.15439	-0.156004	-0.160618	-0.160677	-0.154826	-0.153852		86524	-0.0792663	-0.0783329	-0.0867889	-0.0754818	-0.0788451	-0.0783362	-0.0755651	-0.0756192	-0.0792692	-0.0782619		86524	-0.00198618	-0.00205415	-0.000862642	-0.00241368	-0.00197454	-0.00208428	-0.00241166	-0.00237496	-0.00197934	-0.00196579		86524	-0.001984	-0.00205412	0.00150439	-0.00241366	-0.00197244	-0.00208425	-0.00241165	-0.00237499	-0.0019772	-0.00196375
86525	-0.155958	-0.157232	-0.111296	-0.161762	-0.155575	-0.157193	-0.161828	-0.161887	-0.15601	-0.155039		86525	-0.0799967	-0.0790586	-0.0878824	-0.0761423	-0.0795765	-0.0790614	-0.0762254	-0.0762795	-0.0799999	-0.0789942		86525	-0.00198622	-0.00205415	-0.000899469	-0.00241368	-0.00197457	-0.00208428	-0.00241166	-0.00237496	-0.00197938	-0.00196583		86525	-0.001984	-0.00205412	0.00150361	-0.00241366	-0.00197244	-0.00208425	-0.00241165	-0.00237499	-0.0019772	-0.00196375
86526	-0.157138	-0.158418	-0.112318	-0.162969	-0.156756	-0.158379	-0.163035	-0.163094	-0.157191	-0.156222		86526	-0.0807257	-0.0797832	-0.0889726	-0.0768016	-0.0803067	-0.0797855	-0.0768846	-0.0769387	-0.0807293	-0.0797255		86526	-0.00198626	-0.00205415	-0.000936463	-0.00241368	-0.00197461	-0.00208428	-0.00241166	-0.00237496	-0.00197942	-0.00196587		86526	-0.001984	-0.00205412	0.00150284	-0.00241366	-0.00197244	-0.00208425	-0.00241165	-0.00237499	-0.0019772	-0.00196375
86527	-0.158315	-0.159601	-0.113336	-0.164173	-0.157935	-0.159561	-0.164238	-0.164297	-0.158368	-0.157401		86527	-0.081428	-0.0805068	-0.0900596	-0.0774598	-0.0810328	-0.0805085	-0.0775426	-0.0775968	-0.0814309	-0.0804556		86527	-0.00198631	-0.00205415	-0.000973621	-0.00241368	-0.00197465	-0.00208429	-0.00241166	-0.00237496	-0.00197946	-0.00196591		86527	-0.001984	-0.00205412	0.00150206	-0.00241366	-0.00197244	-0.00208425	-0.00241165	-0.00237499	-0.0019772	-0.00196375
86528	-0.159489	-0.160781	-0.114352	-0.165373	-0.159109	-0.16074	-0.165438	-0.165497	-0.159542	-0.158578		86528	-0.0820912	-0.0812225	-0.0911432	-0.0781168	-0.0817099	-0.0812247	-0.0781995	-0.0782537	-0.0820941	-0.0811757		86528	-0.00198635	-0.00205415	-0.00101094	-0.00241368	-0.0019747	-0.00208429	-0.00241166	-0.00237496	-0.0019795	-0.00196595		86528	-0.001984	-0.00205412	0.00150127	-0.00241366	-0.00197244	-0.00208425	-0.00241165	-0.00237499	-0.0019772	-0.00196375
86529	-0.160659	-0.161957	-0.115365	-0.166569	-0.160281	-0.161915	-0.166634	-0.166693	-0.160712	-0.159751		86529	-0.0827521	-0.0818867	-0.0922236	-0.0787727	-0.0823718	-0.0818901	-0.0788552	-0.0789095	-0.0827551	-0.0818445		86529	-0.00198639	-0.00205415	-0.00104842	-0.00241368	-0.00197474	-0.00208429	-0.00241166	-0.00237496	-0.00197954	-0.00196599		86529	-0.001984	-0.00205412	0.00150048	-0.00241366	-0.00197244	-0.00208425	-0.00241165	-0.00237499	-0.00197721	-0.00196375
86530	-0.161826	-0.163129	-0.116375	-0.167762	-0.161449	-0.163087	-0.167827	-0.167886	-0.161879	-0.16092		86530	-0.0834119	-0.082542	-0.0933008	-0.0794274	-0.0830323	-0.0825448	-0.0795097	-0.0795641	-0.083415	-0.0825061		86530	-0.00198643	-0.00205415	-0.00108606	-0.00241368	-0.00197478	-0.00208429	-0.00241166	-0.00237496	-0.00197958	-0.00196603		86530	-0.00198401	-0.00205412	0.00149969	-0.00241366	-0.00197244	-0.00208425	-0.00241165	-0.00237499	-0.00197721	-0.00196375
86531	-0.162989	-0.164298	-0.117382	-0.168951	-0.162613	-0.164255	-0.169016	-0.169075	-0.163043	-0.162086		86531	-0.0840704	-0.0831961	-0.0943747	-0.080081	-0.0836917	-0.0831984	-0.0801631	-0.0802175	-0.0840737	-0.0831665		86531	-0.00198647	-0.00205416	-0.00112385	-0.00241368	-0.00197482	-0.00208429	-0.00241166	-0.00237496	-0.00197962	-0.00196607		86531	-0.00198401	-0.00205412	0.0014989	-0.00241366	-0.00197244	-0.00208425	-0.00241165	-0.00237499	-0.00197721	-0.00196375
86532	-0.164149	-0.165464	-0.118386	-0.170137	-0.163774	-0.16542	-0.170201	-0.17026	-0.164203	-0.163249		86532	-0.0847278	-0.083849	-0.0954455	-0.0807333	-0.0843499	-0.0838508	-0.0808152	-0.0808697	-0.0847312	-0.0838258		86532	-0.00198651	-0.00205416	-0.0011618	-0.00241368	-0.00197486	-0.00208429	-0.00241166	-0.00237496	-0.00197966	-0.00196611		86532	-0.00198401	-0.00205412	0.0014981	-0.00241366	-0.00197244	-0.00208425	-0.00241165	-0.00237499	-0.00197721	-0.00196375
86533	-0.165305	-0.166626	-0.119387	-0.171319	-0.164932	-0.166582	-0.171383	-0.171442	-0.16536	-0.164408		86533	-0.085384	-0.0845008	-0.096513	-0.0813828	-0.0850069	-0.0845021	-0.0814631	-0.0815152	-0.0853876	-0.0844838		86533	-0.00198656	-0.00205416	-0.0011999	-0.00241368	-0.0019749	-0.00208429	-0.00241166	-0.00237496	-0.0019797	-0.00196615		86533	-0.00198401	-0.00205412	0.0014973	-0.00241366	-0.00197244	-0.00208425	-0.00241165	-0.00237499	-0.00197721	-0.00196375
86534	-0.166459	-0.167785	-0.120386	-0.172498	-0.166087	-0.16774	-0.172561	-0.17262	-0.166513	-0.165563		86534	-0.0860389	-0.0851515	-0.0975774	-0.0819907	-0.0856627	-0.0851523	-0.0820644	-0.0821099	-0.0860427	-0.0851406		86534	-0.0019866	-0.00205416	-0.00123814	-0.00241368	-0.00197494	-0.00208429	-0.00241167	-0.00237496	-0.00197974	-0.00196619		86534	-0.00198401	-0.00205412	0.00149649	-0.00241366	-0.00197244	-0.00208425	-0.00241165	-0.00237499	-0.00197721	-0.00196375
86535	-0.167608	-0.16894	-0.121382	-0.173673	-0.167238	-0.168895	-0.173736	-0.173794	-0.167663	-0.166716		86535	-0.0866927	-0.085801	-0.0986386	-0.0825747	-0.0863173	-0.0858013	-0.0826481	-0.0826931	-0.0866966	-0.0857962		86535	-0.00198664	-0.00205416	-0.00127653	-0.00241368	-0.00197499	-0.00208429	-0.00241167	-0.00237496	-0.00197979	-0.00196624		86535	-0.00198401	-0.00205412	0.00149568	-0.00241366	-0.00197244	-0.00208425	-0.00241165	-0.00237499	-0.00197721	-0.00196375
86536	-0.168755	-0.170092	-0.122375	-0.174844	-0.168385	-0.170047	-0.174907	-0.174966	-0.16881	-0.167865		86536	-0.0873452	-0.0864493	-0.0996967	-0.0831573	-0.0869707	-0.0864491	-0.0832304	-0.0832755	-0.0873493	-0.0864505		86536	-0.00198669	-0.00205416	-0.00131507	-0.00241368	-0.00197503	-0.00208429	-0.00241167	-0.00237496	-0.00197983	-0.00196628		86536	-0.00198401	-0.00205412	0.00149487	-0.00241366	-0.00197244	-0.00208425	-0.00241165	-0.00237499	-0.00197721	-0.00196375
86537	-0.169898	-0.171241	-0.123365	-0.176012	-0.169529	-0.171195	-0.176075	-0.176133	-0.169953	-0.169011		86537	-0.0879965	-0.0870964	-0.100752	-0.0837386	-0.0876228	-0.0870958	-0.0838116	-0.0838566	-0.0880007	-0.0871037		86537	-0.00198673	-0.00205416	-0.00135375	-0.00241368	-0.00197507	-0.00208429	-0.00241167	-0.00237496	-0.00197987	-0.00196632		86537	-0.00198401	-0.00205412	0.00149406	-0.00241366	-0.00197244	-0.00208425	-0.00241165	-0.00237499	-0.00197721	-0.00196375
86538	-0.171037	-0.172386	-0.124352	-0.177177	-0.17067	-0.172339	-0.177239	-0.177297	-0.171093	-0.170153		86538	-0.0886465	-0.0877424	-0.101804	-0.0843187	-0.0882737	-0.0877412	-0.0843916	-0.0844367	-0.0886509	-0.0877556		86538	-0.00198677	-0.00205416	-0.00139256	-0.00241368	-0.00197512	-0.0020843	-0.00241167	-0.00237496	-0.00197992	-0.00196637		86538	-0.00198401	-0.00205412	0.00149324	-0.00241366	-0.00197244	-0.00208425	-0.00241165	-0.00237499	-0.00197721	-0.00196375
86539	-0.172174	-0.173528	-0.125337	-0.178338	-0.171808	-0.17348	-0.178399	-0.178458	-0.17223	-0.171292		86539	-0.0892953	-0.0883871	-0.102852	-0.0848977	-0.0889233	-0.0883854	-0.0849703	-0.0850155	-0.0892998	-0.0884062		86539	-0.00198682	-0.00205416	-0.00143152	-0.00241368	-0.00197516	-0.0020843	-0.00241167	-0.00237496	-0.00197996	-0.00196641		86539	-0.00198401	-0.00205412	0.00149242	-0.00241366	-0.00197244	-0.00208425	-0.00241165	-0.00237499	-0.00197721	-0.00196375
86540	-0.173307	-0.174667	-0.126319	-0.179495	-0.172942	-0.174618	-0.179557	-0.179615	-0.173363	-0.172427		86540	-0.0899428	-0.0890306	-0.103898	-0.0854754	-0.0895716	-0.0890285	-0.0855479	-0.0855931	-0.0899474	-0.0890555		86540	-0.00198686	-0.00205416	-0.0014706	-0.00241368	-0.0019752	-0.0020843	-0.00241167	-0.00237496	-0.00198	-0.00196645		86540	-0.00198401	-0.00205412	0.00149159	-0.00241366	-0.00197245	-0.00208425	-0.00241165	-0.00237499	-0.00197721	-0.00196375
86541	-0.174436	-0.175802	-0.127298	-0.180649	-0.174073	-0.175753	-0.18071	-0.180768	-0.174493	-0.17356		86541	-0.090589	-0.0896729	-0.104941	-0.086052	-0.0902187	-0.0896703	-0.0861243	-0.0861696	-0.0905937	-0.0897036		86541	-0.00198691	-0.00205416	-0.00150983	-0.00241368	-0.00197525	-0.0020843	-0.00241167	-0.00237496	-0.00198005	-0.0019665		86541	-0.00198401	-0.00205412	0.00149076	-0.00241366	-0.00197245	-0.00208425	-0.00241165	-0.00237499	-0.00197721	-0.00196375
86542	-0.175563	-0.176933	-0.128274	-0.1818	-0.1752	-0.176884	-0.18186	-0.181919	-0.17562	-0.174688		86542	-0.0912339	-0.0903139	-0.10598	-0.0866274	-0.0908644	-0.0903108	-0.0866995	-0.0867448	-0.0912388	-0.0903503		86542	-0.00198695	-0.00205417	-0.00154918	-0.00241368	-0.00197529	-0.0020843	-0.00241167	-0.00237496	-0.00198009	-0.00196654		86542	-0.00198401	-0.00205412	0.00148993	-0.00241366	-0.00197245	-0.00208425	-0.00241165	-0.00237499	-0.00197721	-0.00196376
86543	-0.176686	-0.178062	-0.129248	-0.182947	-0.176325	-0.178012	-0.183007	-0.183065	-0.176743	-0.175814		86543	-0.0918775	-0.0909537	-0.107017	-0.0872016	-0.0915089	-0.0909501	-0.0872735	-0.0873189	-0.0918826	-0.0909958		86543	-0.001987	-0.00205417	-0.00158866	-0.00241368	-0.00197534	-0.0020843	-0.00241167	-0.00237496	-0.00198014	-0.00196659		86543	-0.00198401	-0.00205412	0.0014891	-0.00241366	-0.00197245	-0.00208425	-0.00241165	-0.00237499	-0.00197721	-0.00196376
86544	-0.177806	-0.179187	-0.130219	-0.18409	-0.177446	-0.179136	-0.18415	-0.184208	-0.177863	-0.176936		86544	-0.0925198	-0.0915922	-0.108051	-0.0877745	-0.092152	-0.0915882	-0.0878464	-0.0878917	-0.092525	-0.0916399		86544	-0.00198705	-0.00205417	-0.00162827	-0.00241368	-0.00197538	-0.0020843	-0.00241167	-0.00237496	-0.00198018	-0.00196663		86544	-0.00198401	-0.00205412	0.00148826	-0.00241366	-0.00197245	-0.00208425	-0.00241165	-0.00237499	-0.00197721	-0.00196376
86545	-0.178922	-0.180309	-0.131188	-0.18523	-0.178563	-0.180257	-0.18529	-0.185348	-0.17898	-0.178055		86545	-0.0931607	-0.0922295	-0.109081	-0.0883463	-0.0927938	-0.0922249	-0.088418	-0.0884634	-0.0931661	-0.0922828		86545	-0.00198709	-0.00205417	-0.001668	-0.00241368	-0.00197543	-0.0020843	-0.00241167	-0.00237496	-0.00198023	-0.00196668		86545	-0.00198401	-0.00205412	0.00148742	-0.00241366	-0.00197245	-0.00208425	-0.00241165	-0.00237499	-0.00197721	-0.00196376
86546	-0.180035	-0.181427	-0.132153	-0.186367	-0.179677	-0.181375	-0.186426	-0.186484	-0.180093	-0.179171		86546	-0.0938004	-0.0928655	-0.110109	-0.0889169	-0.0934343	-0.0928605	-0.0889884	-0.0890338	-0.0938059	-0.0929243		86546	-0.00198714	-0.00205417	-0.00170786	-0.00241368	-0.00197547	-0.0020843	-0.00241167	-0.00237496	-0.00198027	-0.00196672		86546	-0.00198401	-0.00205412	0.00148658	-0.00241366	-0.00197245	-0.00208425	-0.00241165	-0.00237499	-0.00197721	-0.00196376
86547	-0.181145	-0.182542	-0.133117	-0.1875	-0.180788	-0.18249	-0.187559	-0.187617	-0.181203	-0.180283		86547	-0.0944387	-0.0935002	-0.111133	-0.0894862	-0.0940735	-0.0934947	-0.0895575	-0.0896031	-0.0944444	-0.0935644		86547	-0.00198718	-0.00205417	-0.00174783	-0.00241368	-0.00197552	-0.0020843	-0.00241167	-0.00237496	-0.00198032	-0.00196677		86547	-0.00198401	-0.00205412	0.00148574	-0.00241366	-0.00197245	-0.00208425	-0.00241165	-0.00237499	-0.00197722	-0.00196376
86548	-0.182252	-0.183654	-0.134077	-0.18863	-0.181896	-0.183601	-0.188689	-0.188747	-0.18231	-0.181392		86548	-0.0950757	-0.0941336	-0.112155	-0.0900544	-0.0947113	-0.0941276	-0.0901255	-0.0901711	-0.0950815	-0.0942033		86548	-0.00198723	-0.00205417	-0.00178793	-0.00241368	-0.00197557	-0.00208431	-0.00241167	-0.00237496	-0.00198036	-0.00196681		86548	-0.00198402	-0.00205412	0.00148489	-0.00241366	-0.00197245	-0.00208425	-0.00241165	-0.00237499	-0.00197722	-0.00196376
86549	-0.183355	-0.184762	-0.135035	-0.189756	-0.183001	-0.184709	-0.189815	-0.189873	-0.183414	-0.182498		86549	-0.0957113	-0.0947657	-0.113174	-0.0906213	-0.0953478	-0.0947593	-0.0906923	-0.0907379	-0.0957173	-0.0948407		86549	-0.00198728	-0.00205417	-0.00182814	-0.00241368	-0.00197561	-0.00208431	-0.00241167	-0.00237496	-0.00198041	-0.00196686		86549	-0.00198402	-0.00205412	0.00148404	-0.00241366	-0.00197245	-0.00208425	-0.00241165	-0.00237499	-0.00197722	-0.00196376
86550	-0.184455	-0.185868	-0.13599	-0.190879	-0.184102	-0.185813	-0.190937	-0.190995	-0.184514	-0.1836		86550	-0.0963455	-0.0953965	-0.11419	-0.091187	-0.0959829	-0.0953896	-0.0912579	-0.0913035	-0.0963517	-0.0954769		86550	-0.00198733	-0.00205417	-0.00186847	-0.00241368	-0.00197566	-0.00208431	-0.00241167	-0.00237496	-0.00198045	-0.00196691		86550	-0.00198402	-0.00205412	0.00148318	-0.00241366	-0.00197245	-0.00208425	-0.00241165	-0.00237499	-0.00197722	-0.00196376
86551	-0.185552	-0.186969	-0.136943	-0.191999	-0.1852	-0.186915	-0.192057	-0.192114	-0.185611	-0.1847		86551	-0.0969784	-0.096026	-0.115203	-0.0917516	-0.0966166	-0.0960186	-0.0918222	-0.0918679	-0.0969847	-0.0961116		86551	-0.00198737	-0.00205417	-0.00190891	-0.00241368	-0.00197571	-0.00208431	-0.00241167	-0.00237496	-0.0019805	-0.00196695		86551	-0.00198402	-0.00205412	0.00148233	-0.00241366	-0.00197245	-0.00208425	-0.00241165	-0.00237499	-0.00197722	-0.00196376
86552	-0.186645	-0.188068	-0.137893	-0.193115	-0.186294	-0.188013	-0.193172	-0.19323	-0.186705	-0.185796		86552	-0.09761	-0.0966542	-0.116213	-0.0923149	-0.097249	-0.0966463	-0.0923853	-0.0924311	-0.0976164	-0.096745		86552	-0.00198742	-0.00205418	-0.00194946	-0.00241368	-0.00197575	-0.00208431	-0.00241167	-0.00237496	-0.00198055	-0.001967		86552	-0.00198402	-0.00205412	0.00148147	-0.00241366	-0.00197245	-0.00208425	-0.00241165	-0.00237499	-0.00197722	-0.00196376
86553	-0.187736	-0.189163	-0.138841	-0.194228	-0.187386	-0.189108	-0.194285	-0.194343	-0.187796	-0.186888		86553	-0.0982401	-0.097281	-0.11722	-0.0928769	-0.09788	-0.0972727	-0.0929473	-0.092993	-0.0982467	-0.097377		86553	-0.00198747	-0.00205418	-0.00199012	-0.00241368	-0.0019758	-0.00208431	-0.00241167	-0.00237496	-0.0019806	-0.00196705		86553	-0.00198402	-0.00205412	0.00148061	-0.00241366	-0.00197245	-0.00208425	-0.00241165	-0.00237499	-0.00197722	-0.00196376
86554	-0.188823	-0.190256	-0.139786	-0.195337	-0.188474	-0.190199	-0.195394	-0.195452	-0.188883	-0.187978		86554	-0.0988689	-0.0979065	-0.118225	-0.0934378	-0.0985096	-0.0978978	-0.093508	-0.0935538	-0.0988756	-0.0980077		86554	-0.00198752	-0.00205418	-0.00203088	-0.00241368	-0.00197585	-0.00208431	-0.00241167	-0.00237496	-0.00198064	-0.0019671		86554	-0.00198402	-0.00205412	0.00147974	-0.00241366	-0.00197245	-0.00208425	-0.00241165	-0.00237499	-0.00197722	-0.00196376
86555	-0.189907	-0.191345	-0.140728	-0.196443	-0.189559	-0.191288	-0.1965	-0.196558	-0.189967	-0.189064		86555	-0.0994963	-0.0985307	-0.119226	-0.0939975	-0.0991379	-0.0985215	-0.0940675	-0.0941133	-0.0995032	-0.0986369		86555	-0.00198757	-0.00205418	-0.00207176	-0.00241368	-0.0019759	-0.00208431	-0.00241167	-0.00237496	-0.00198069	-0.00196715		86555	-0.00198402	-0.00205412	0.00147888	-0.00241366	-0.00197245	-0.00208425	-0.00241165	-0.00237499	-0.00197722	-0.00196376
86556	-0.190987	-0.19243	-0.141668	-0.197546	-0.190641	-0.192373	-0.197603	-0.19766	-0.191048	-0.190147		86556	-0.100122	-0.0991535	-0.120225	-0.0945559	-0.0997647	-0.0991439	-0.0946257	-0.0946716	-0.100129	-0.0992648		86556	-0.00198762	-0.00205418	-0.00211273	-0.00241368	-0.00197595	-0.00208431	-0.00241167	-0.00237496	-0.00198074	-0.00196719		86556	-0.00198402	-0.00205412	0.00147801	-0.00241366	-0.00197245	-0.00208425	-0.00241165	-0.00237499	-0.00197722	-0.00196376
86557	-0.192065	-0.193513	-0.142605	-0.198646	-0.19172	-0.193455	-0.198702	-0.198759	-0.192126	-0.191227		86557	-0.100747	-0.099775	-0.121221	-0.0951131	-0.10039	-0.0997649	-0.0951828	-0.0952287	-0.100754	-0.0998912		86557	-0.00198767	-0.00205418	-0.00215381	-0.00241368	-0.001976	-0.00208431	-0.00241167	-0.00237496	-0.00198079	-0.00196724		86557	-0.00198402	-0.00205412	0.00147713	-0.00241366	-0.00197246	-0.00208425	-0.00241165	-0.00237499	-0.00197722	-0.00196376
86558	-0.193139	-0.194592	-0.14354	-0.199742	-0.192795	-0.194533	-0.199798	-0.199855	-0.1932	-0.192304		86558	-0.10137	-0.100395	-0.122214	-0.0956691	-0.101014	-0.100385	-0.0957386	-0.0957846	-0.101377	-0.100516		86558	-0.00198771	-0.00205418	-0.00219499	-0.00241369	-0.00197604	-0.00208432	-0.00241167	-0.00237496	-0.00198083	-0.00196729		86558	-0.00198402	-0.00205412	0.00147626	-0.00241366	-0.00197246	-0.00208425	-0.00241165	-0.00237499	-0.00197722	-0.00196377
86559	-0.194211	-0.195668	-0.144473	-0.200835	-0.193867	-0.195609	-0.20089	-0.200948	-0.194272	-0.193377		86559	-0.101992	-0.101014	-0.123204	-0.0962239	-0.101637	-0.101003	-0.0962933	-0.0963393	-0.101999	-0.10114		86559	-0.00198776	-0.00205418	-0.00223627	-0.00241369	-0.00197609	-0.00208432	-0.00241167	-0.00237496	-0.00198088	-0.00196734		86559	-0.00198402	-0.00205412	0.00147538	-0.00241366	-0.00197246	-0.00208425	-0.00241165	-0.00237499	-0.00197722	-0.00196377
86560	-0.195279	-0.196741	-0.145402	-0.201924	-0.194936	-0.196681	-0.20198	-0.202037	-0.19534	-0.194448		86560	-0.102612	-0.101631	-0.124192	-0.0967775	-0.102258	-0.10162	-0.0968467	-0.0968927	-0.10262	-0.101762		86560	-0.00198781	-0.00205418	-0.00227764	-0.00241369	-0.00197614	-0.00208432	-0.00241167	-0.00237496	-0.00198093	-0.00196739		86560	-0.00198402	-0.00205412	0.0014745	-0.00241366	-0.00197246	-0.00208425	-0.00241165	-0.00237499	-0.00197722	-0.00196377
86561	-0.196344	-0.197811	-0.14633	-0.203011	-0.196002	-0.197751	-0.203066	-0.203123	-0.196405	-0.195515		86561	-0.103231	-0.102247	-0.125177	-0.0973299	-0.102878	-0.102236	-0.0973989	-0.097445	-0.103239	-0.102383		86561	-0.00198786	-0.00205419	-0.00231911	-0.00241369	-0.00197619	-0.00208432	-0.00241167	-0.00237496	-0.00198098	-0.00196744		86561	-0.00198402	-0.00205412	0.00147362	-0.00241366	-0.00197246	-0.00208425	-0.00241165	-0.00237499	-0.00197722	-0.00196377
86562	-0.197405	-0.198877	-0.147255	-0.204094	-0.197065	-0.198817	-0.204148	-0.204206	-0.197467	-0.196579		86562	-0.103849	-0.102862	-0.126159	-0.097881	-0.103496	-0.10285	-0.0979499	-0.097996	-0.103857	-0.103003		86562	-0.00198792	-0.00205419	-0.00236067	-0.00241369	-0.00197624	-0.00208432	-0.00241167	-0.00237496	-0.00198103	-0.00196749		86562	-0.00198402	-0.00205412	0.00147274	-0.00241366	-0.00197246	-0.00208425	-0.00241165	-0.00237499	-0.00197722	-0.00196377
86563	-0.198464	-0.199941	-0.148177	-0.205174	-0.198125	-0.19988	-0.205228	-0.205285	-0.198526	-0.19764		86563	-0.104465	-0.103475	-0.127138	-0.098431	-0.104113	-0.103463	-0.0984996	-0.0985458	-0.104473	-0.103621		86563	-0.00198797	-0.00205419	-0.00240233	-0.00241369	-0.00197629	-0.00208432	-0.00241167	-0.00237496	-0.00198108	-0.00196754		86563	-0.00198402	-0.00205412	0.00147185	-0.00241366	-0.00197246	-0.00208425	-0.00241165	-0.00237499	-0.00197723	-0.00196377
86564	-0.19952	-0.201001	-0.149098	-0.20625	-0.199182	-0.200939	-0.206304	-0.206362	-0.199582	-0.198698		86564	-0.10508	-0.104087	-0.128115	-0.0989797	-0.104729	-0.104074	-0.0990482	-0.0990944	-0.105088	-0.104237		86564	-0.00198802	-0.00205419	-0.00244407	-0.00241369	-0.00197634	-0.00208432	-0.00241167	-0.00237496	-0.00198113	-0.00196759		86564	-0.00198403	-0.00205412	0.00147096	-0.00241366	-0.00197246	-0.00208425	-0.00241165	-0.00237499	-0.00197723	-0.00196377
86565	-0.200572	-0.202058	-0.150015	-0.207324	-0.200235	-0.201996	-0.207377	-0.207435	-0.200635	-0.199753		86565	-0.105693	-0.104698	-0.129089	-0.0995272	-0.105343	-0.104684	-0.0995955	-0.0996418	-0.105702	-0.104852		86565	-0.00198807	-0.00205419	-0.00248591	-0.00241369	-0.00197639	-0.00208432	-0.00241167	-0.00237496	-0.00198118	-0.00196764		86565	-0.00198403	-0.00205412	0.00147007	-0.00241366	-0.00197246	-0.00208425	-0.00241165	-0.00237499	-0.00197723	-0.00196377
86566	-0.201621	-0.203112	-0.15093	-0.208394	-0.201286	-0.203049	-0.208447	-0.208505	-0.201684	-0.200804		86566	-0.106305	-0.105307	-0.13006	-0.100073	-0.105956	-0.105293	-0.100142	-0.100188	-0.106314	-0.105466		86566	-0.00198812	-0.00205419	-0.00252783	-0.00241369	-0.00197644	-0.00208433	-0.00241167	-0.00237496	-0.00198123	-0.00196769		86566	-0.00198403	-0.00205412	0.00146918	-0.00241366	-0.00197246	-0.00208425	-0.00241165	-0.00237499	-0.00197723	-0.00196377
86567	-0.202668	-0.204163	-0.151843	-0.209461	-0.202333	-0.2041	-0.209514	-0.209571	-0.202731	-0.201853		86567	-0.106915	-0.105915	-0.131029	-0.100619	-0.106567	-0.1059	-0.100687	-0.100733	-0.106924	-0.106078		86567	-0.00198817	-0.00205419	-0.00256983	-0.00241369	-0.0019765	-0.00208433	-0.00241167	-0.00237496	-0.00198128	-0.00196774		86567	-0.00198403	-0.00205412	0.00146828	-0.00241366	-0.00197246	-0.00208425	-0.00241165	-0.00237499	-0.00197723	-0.00196377
86568	-0.203711	-0.205211	-0.152754	-0.210525	-0.203377	-0.205147	-0.210578	-0.210635	-0.203774	-0.202898		86568	-0.107524	-0.106521	-0.131994	-0.101162	-0.107177	-0.106506	-0.10123	-0.101277	-0.107534	-0.106689		86568	-0.00198822	-0.00205419	-0.00261192	-0.00241369	-0.00197655	-0.00208433	-0.00241167	-0.00237496	-0.00198133	-0.0019678		86568	-0.00198403	-0.00205412	0.00146739	-0.00241366	-0.00197246	-0.00208425	-0.00241165	-0.00237499	-0.00197723	-0.00196377
86569	-0.204751	-0.206256	-0.153662	-0.211585	-0.204418	-0.206191	-0.211638	-0.211695	-0.204815	-0.203941		86569	-0.108132	-0.107126	-0.132958	-0.101705	-0.107786	-0.107111	-0.101773	-0.101819	-0.108141	-0.107299		86569	-0.00198827	-0.00205419	-0.00265409	-0.00241369	-0.0019766	-0.00208433	-0.00241167	-0.00237496	-0.00198138	-0.00196785		86569	-0.00198403	-0.00205412	0.00146649	-0.00241366	-0.00197246	-0.00208425	-0.00241165	-0.00237499	-0.00197723	-0.00196377
86570	-0.205788	-0.207297	-0.154568	-0.212643	-0.205456	-0.207233	-0.212695	-0.212752	-0.205852	-0.20498		86570	-0.108738	-0.10773	-0.133918	-0.102247	-0.108393	-0.107714	-0.102314	-0.102361	-0.108748	-0.107907		86570	-0.00198833	-0.0020542	-0.00269634	-0.00241369	-0.00197665	-0.00208433	-0.00241167	-0.00237496	-0.00198143	-0.0019679		86570	-0.00198403	-0.00205412	0.00146558	-0.00241366	-0.00197246	-0.00208425	-0.00241165	-0.00237499	-0.00197723	-0.00196377
86571	-0.206822	-0.208336	-0.155471	-0.213697	-0.206492	-0.208271	-0.213749	-0.213806	-0.206886	-0.206016		86571	-0.109343	-0.108332	-0.134876	-0.102787	-0.108998	-0.108316	-0.102854	-0.102901	-0.109353	-0.108513		86571	-0.00198838	-0.0020542	-0.00273867	-0.00241369	-0.0019767	-0.00208433	-0.00241167	-0.00237496	-0.00198148	-0.00196795		86571	-0.00198403	-0.00205412	0.00146468	-0.00241366	-0.00197246	-0.00208425	-0.00241165	-0.00237499	-0.00197723	-0.00196377
86572	-0.207853	-0.209372	-0.156372	-0.214748	-0.207524	-0.209306	-0.2148	-0.214857	-0.207918	-0.207049		86572	-0.109946	-0.108933	-0.135832	-0.103326	-0.109602	-0.108916	-0.103393	-0.10344	-0.109956	-0.109118		86572	-0.00198843	-0.0020542	-0.00278108	-0.00241369	-0.00197675	-0.00208433	-0.00241167	-0.00237497	-0.00198154	-0.001968		86572	-0.00198403	-0.00205412	0.00146377	-0.00241366	-0.00197247	-0.00208425	-0.00241165	-0.00237499	-0.00197723	-0.00196377
86573	-0.208881	-0.210404	-0.157271	-0.215796	-0.208553	-0.210338	-0.215848	-0.215905	-0.208946	-0.20808		86573	-0.110548	-0.109532	-0.136785	-0.103864	-0.110205	-0.109515	-0.103931	-0.103977	-0.110558	-0.109722		86573	-0.00198849	-0.0020542	-0.00282356	-0.00241369	-0.00197681	-0.00208433	-0.00241167	-0.00237497	-0.00198159	-0.00196806		86573	-0.00198403	-0.00205412	0.00146287	-0.00241366	-0.00197247	-0.00208425	-0.00241165	-0.00237499	-0.00197723	-0.00196378
86574	-0.209906	-0.211434	-0.158167	-0.216841	-0.209579	-0.211367	-0.216892	-0.216949	-0.209971	-0.209107		86574	-0.111149	-0.11013	-0.137735	-0.1044	-0.110806	-0.110113	-0.104467	-0.104514	-0.111159	-0.110324		86574	-0.00198854	-0.0020542	-0.00286612	-0.00241369	-0.00197686	-0.00208433	-0.00241167	-0.00237497	-0.00198164	-0.00196811		86574	-0.00198403	-0.00205412	0.00146196	-0.00241366	-0.00197247	-0.00208425	-0.00241165	-0.00237499	-0.00197723	-0.00196378
86575	-0.210929	-0.21246	-0.159061	-0.217883	-0.210602	-0.212393	-0.217934	-0.217991	-0.210994	-0.210131		86575	-0.111748	-0.110727	-0.138683	-0.104936	-0.111406	-0.110709	-0.105003	-0.105049	-0.111758	-0.110925		86575	-0.00198859	-0.0020542	-0.00290875	-0.00241369	-0.00197691	-0.00208434	-0.00241167	-0.00237497	-0.00198169	-0.00196816		86575	-0.00198403	-0.00205412	0.00146104	-0.00241366	-0.00197247	-0.00208425	-0.00241165	-0.00237499	-0.00197723	-0.00196378
86576	-0.211948	-0.213484	-0.159953	-0.218922	-0.211622	-0.213416	-0.218972	-0.219029	-0.212013	-0.211152		86576	-0.112345	-0.111322	-0.139628	-0.10547	-0.112005	-0.111304	-0.105537	-0.105583	-0.112355	-0.111525		86576	-0.00198865	-0.0020542	-0.00295145	-0.00241369	-0.00197696	-0.00208434	-0.00241167	-0.00237497	-0.00198174	-0.00196821		86576	-0.00198403	-0.00205412	0.00146013	-0.00241366	-0.00197247	-0.00208425	-0.00241165	-0.00237499	-0.00197723	-0.00196378
86577	-0.212964	-0.214504	-0.160842	-0.219958	-0.212639	-0.214436	-0.220008	-0.220065	-0.213029	-0.212171		86577	-0.112941	-0.111916	-0.14057	-0.106003	-0.112602	-0.111897	-0.10607	-0.106116	-0.112952	-0.112123		86577	-0.0019887	-0.0020542	-0.00299422	-0.00241369	-0.00197702	-0.00208434	-0.00241167	-0.00237497	-0.0019818	-0.00196827		86577	-0.00198403	-0.00205412	0.00145921	-0.00241366	-0.00197247	-0.00208425	-0.00241165	-0.00237499	-0.00197724	-0.00196378
86578	-0.213977	-0.215522	-0.16173	-0.22099	-0.213653	-0.215453	-0.22104	-0.221097	-0.214043	-0.213186		86578	-0.113536	-0.112508	-0.14151	-0.106535	-0.113197	-0.112489	-0.106601	-0.106648	-0.113547	-0.112719		86578	-0.00198875	-0.00205421	-0.00303707	-0.00241369	-0.00197707	-0.00208434	-0.00241167	-0.00237497	-0.00198185	-0.00196832		86578	-0.00198404	-0.00205412	0.00145829	-0.00241366	-0.00197247	-0.00208425	-0.00241165	-0.00237499	-0.00197724	-0.00196378
86579	-0.214987	-0.216536	-0.162615	-0.22202	-0.214664	-0.216467	-0.22207	-0.222126	-0.215053	-0.214198		86579	-0.114129	-0.113099	-0.142448	-0.107066	-0.113791	-0.11308	-0.107132	-0.107178	-0.11414	-0.113314		86579	-0.00198881	-0.00205421	-0.00307998	-0.00241369	-0.00197713	-0.00208434	-0.00241167	-0.00237497	-0.0019819	-0.00196838		86579	-0.00198404	-0.00205412	0.00145737	-0.00241366	-0.00197247	-0.00208425	-0.00241165	-0.00237499	-0.00197724	-0.00196378
86580	-0.215994	-0.217548	-0.163497	-0.223046	-0.215673	-0.217478	-0.223096	-0.223153	-0.216061	-0.215208		86580	-0.114721	-0.113689	-0.143383	-0.107595	-0.114384	-0.113669	-0.107661	-0.107708	-0.114732	-0.113908		86580	-0.00198886	-0.00205421	-0.00312295	-0.00241369	-0.00197718	-0.00208434	-0.00241167	-0.00237497	-0.00198196	-0.00196843		86580	-0.00198404	-0.00205412	0.00145645	-0.00241366	-0.00197247	-0.00208425	-0.00241165	-0.00237499	-0.00197724	-0.00196378
86581	-0.216999	-0.218556	-0.164378	-0.22407	-0.216678	-0.218486	-0.224119	-0.224176	-0.217065	-0.216214		86581	-0.115311	-0.114277	-0.144316	-0.108123	-0.114975	-0.114257	-0.108189	-0.108236	-0.115322	-0.1145		86581	-0.00198892	-0.00205421	-0.00316599	-0.00241369	-0.00197723	-0.00208434	-0.00241167	-0.00237497	-0.00198201	-0.00196848		86581	-0.00198404	-0.00205412	0.00145553	-0.00241366	-0.00197247	-0.00208425	-0.00241165	-0.00237499	-0.00197724	-0.00196378
86582	-0.218	-0.219562	-0.165256	-0.22509	-0.21768	-0.219492	-0.225139	-0.225196	-0.218067	-0.217218		86582	-0.1159	-0.114864	-0.145246	-0.10865	-0.115565	-0.114844	-0.108716	-0.108763	-0.115912	-0.115091		86582	-0.00198897	-0.00205421	-0.0032091	-0.00241369	-0.00197729	-0.00208434	-0.00241168	-0.00237497	-0.00198206	-0.00196854		86582	-0.00198404	-0.00205412	0.0014546	-0.00241366	-0.00197247	-0.00208425	-0.00241165	-0.00237499	-0.00197724	-0.00196378
86583	-0.218999	-0.220565	-0.166132	-0.226108	-0.21868	-0.220494	-0.226157	-0.226213	-0.219066	-0.218218		86583	-0.116488	-0.115449	-0.146173	-0.109176	-0.116153	-0.115429	-0.109242	-0.109289	-0.116499	-0.11568		86583	-0.00198903	-0.00205421	-0.00325226	-0.00241369	-0.00197734	-0.00208435	-0.00241168	-0.00237497	-0.00198212	-0.00196859		86583	-0.00198404	-0.00205412	0.00145368	-0.00241366	-0.00197247	-0.00208425	-0.00241165	-0.00237499	-0.00197724	-0.00196378
86584	-0.219994	-0.221565	-0.167006	-0.227122	-0.219676	-0.221493	-0.227171	-0.227227	-0.220062	-0.219216		86584	-0.117074	-0.116033	-0.147098	-0.109701	-0.11674	-0.116012	-0.109766	-0.109813	-0.117085	-0.116268		86584	-0.00198908	-0.00205421	-0.00329549	-0.00241369	-0.0019774	-0.00208435	-0.00241168	-0.00237497	-0.00198217	-0.00196865		86584	-0.00198404	-0.00205412	0.00145275	-0.00241366	-0.00197247	-0.00208425	-0.00241165	-0.00237499	-0.00197724	-0.00196378
86585	-0.220987	-0.222562	-0.167877	-0.228134	-0.22067	-0.22249	-0.228182	-0.228239	-0.221055	-0.220211		86585	-0.117658	-0.116616	-0.148021	-0.110225	-0.117325	-0.116594	-0.11029	-0.110337	-0.11767	-0.116854		86585	-0.00198914	-0.00205421	-0.00333877	-0.00241369	-0.00197745	-0.00208435	-0.00241168	-0.00237497	-0.00198222	-0.0019687		86585	-0.00198404	-0.00205412	0.00145182	-0.00241366	-0.00197248	-0.00208425	-0.00241165	-0.00237499	-0.00197724	-0.00196378
86586	-0.221977	-0.223556	-0.168746	-0.229142	-0.221661	-0.223484	-0.22919	-0.229247	-0.222045	-0.221203		86586	-0.118241	-0.117197	-0.148941	-0.110747	-0.117909	-0.117175	-0.110812	-0.110859	-0.118253	-0.117439		86586	-0.00198919	-0.00205422	-0.00338212	-0.00241369	-0.00197751	-0.00208435	-0.00241168	-0.00237497	-0.00198228	-0.00196876		86586	-0.00198404	-0.00205412	0.00145088	-0.00241366	-0.00197248	-0.00208425	-0.00241165	-0.00237499	-0.00197724	-0.00196379
86587	-0.222964	-0.224547	-0.169614	-0.230148	-0.222649	-0.224474	-0.230196	-0.230252	-0.223032	-0.222192		86587	-0.118823	-0.117777	-0.149859	-0.111268	-0.118492	-0.117755	-0.111333	-0.11138	-0.118835	-0.118023		86587	-0.00198925	-0.00205422	-0.00342552	-0.00241369	-0.00197756	-0.00208435	-0.00241168	-0.00237497	-0.00198233	-0.00196881		86587	-0.00198404	-0.00205412	0.00144995	-0.00241366	-0.00197248	-0.00208425	-0.00241165	-0.00237499	-0.00197724	-0.00196379
86588	-0.223948	-0.225536	-0.170478	-0.231151	-0.223634	-0.225462	-0.231198	-0.231255	-0.224016	-0.223178		86588	-0.119403	-0.118355	-0.150774	-0.111788	-0.119073	-0.118333	-0.111853	-0.1119	-0.119416	-0.118605		86588	-0.0019893	-0.00205422	-0.00346898	-0.00241369	-0.00197762	-0.00208435	-0.00241168	-0.00237497	-0.00198239	-0.00196887		86588	-0.00198404	-0.00205412	0.00144901	-0.00241366	-0.00197248	-0.00208425	-0.00241165	-0.00237499	-0.00197724	-0.00196379
86589	-0.22493	-0.226521	-0.171341	-0.23215	-0.224617	-0.226447	-0.232198	-0.232254	-0.224998	-0.224161		86589	-0.119982	-0.118932	-0.151687	-0.112307	-0.119653	-0.118909	-0.112372	-0.112419	-0.119995	-0.119185		86589	-0.00198936	-0.00205422	-0.00351249	-0.00241369	-0.00197767	-0.00208435	-0.00241168	-0.00237497	-0.00198244	-0.00196893		86589	-0.00198404	-0.00205412	0.00144808	-0.00241366	-0.00197248	-0.00208425	-0.00241165	-0.00237499	-0.00197724	-0.00196379
86590	-0.225908	-0.227504	-0.172202	-0.233147	-0.225596	-0.22743	-0.233194	-0.233251	-0.225977	-0.225142		86590	-0.12056	-0.119508	-0.152598	-0.112825	-0.120231	-0.119484	-0.112889	-0.112936	-0.120572	-0.119764		86590	-0.00198942	-0.00205422	-0.00355606	-0.00241369	-0.00197773	-0.00208435	-0.00241168	-0.00237497	-0.0019825	-0.00196898		86590	-0.00198404	-0.00205412	0.00144714	-0.00241366	-0.00197248	-0.00208425	-0.00241165	-0.00237499	-0.00197724	-0.00196379
86591	-0.226884	-0.228484	-0.17306	-0.234141	-0.226573	-0.228409	-0.234188	-0.234244	-0.226953	-0.22612		86591	-0.121136	-0.120082	-0.153506	-0.113341	-0.120808	-0.120058	-0.113406	-0.113453	-0.121148	-0.120342		86591	-0.00198947	-0.00205422	-0.00359968	-0.00241369	-0.00197779	-0.00208436	-0.00241168	-0.00237497	-0.00198255	-0.00196904		86591	-0.00198405	-0.00205412	0.0014462	-0.00241366	-0.00197248	-0.00208425	-0.00241165	-0.00237499	-0.00197725	-0.00196379
86592	-0.227857	-0.229461	-0.173917	-0.235132	-0.227547	-0.229386	-0.235179	-0.235235	-0.227926	-0.227095		86592	-0.12171	-0.120654	-0.154412	-0.113857	-0.121383	-0.12063	-0.113921	-0.113968	-0.121723	-0.120918		86592	-0.00198953	-0.00205422	-0.00364335	-0.00241369	-0.00197784	-0.00208436	-0.00241168	-0.00237497	-0.00198261	-0.0019691		86592	-0.00198405	-0.00205412	0.00144525	-0.00241366	-0.00197248	-0.00208425	-0.00241165	-0.00237499	-0.00197725	-0.00196379
86593	-0.228827	-0.230435	-0.174771	-0.23612	-0.228518	-0.230359	-0.236167	-0.236223	-0.228896	-0.228067		86593	-0.122283	-0.121226	-0.155316	-0.114371	-0.121957	-0.121201	-0.114435	-0.114482	-0.122296	-0.121493		86593	-0.00198959	-0.00205423	-0.00368706	-0.00241369	-0.0019779	-0.00208436	-0.00241168	-0.00237497	-0.00198266	-0.00196915		86593	-0.00198405	-0.00205412	0.00144431	-0.00241366	-0.00197248	-0.00208425	-0.00241165	-0.00237499	-0.00197725	-0.00196379
86594	-0.229795	-0.231406	-0.175623	-0.237106	-0.229486	-0.23133	-0.237152	-0.237208	-0.229864	-0.229036		86594	-0.122855	-0.121796	-0.156217	-0.114884	-0.122529	-0.121771	-0.114948	-0.114995	-0.122868	-0.122067		86594	-0.00198964	-0.00205423	-0.00373083	-0.00241369	-0.00197795	-0.00208436	-0.00241168	-0.00237497	-0.00198272	-0.00196921		86594	-0.00198405	-0.00205412	0.00144336	-0.00241366	-0.00197248	-0.00208425	-0.00241165	-0.00237499	-0.00197725	-0.00196379
86595	-0.230759	-0.232375	-0.176473	-0.238088	-0.230452	-0.232299	-0.238134	-0.23819	-0.230829	-0.230003		86595	-0.123425	-0.122364	-0.157116	-0.115396	-0.1231	-0.122339	-0.115459	-0.115507	-0.123439	-0.122639		86595	-0.0019897	-0.00205423	-0.00377465	-0.00241369	-0.00197801	-0.00208436	-0.00241168	-0.00237497	-0.00198278	-0.00196927		86595	-0.00198405	-0.00205412	0.00144242	-0.00241366	-0.00197248	-0.00208425	-0.00241165	-0.00237499	-0.00197725	-0.00196379
86596	-0.231721	-0.233341	-0.177321	-0.239068	-0.231414	-0.233264	-0.239113	-0.239169	-0.231791	-0.230967		86596	-0.123994	-0.122931	-0.158012	-0.115906	-0.12367	-0.122906	-0.11597	-0.116017	-0.124007	-0.123209		86596	-0.00198976	-0.00205423	-0.00381851	-0.00241369	-0.00197807	-0.00208436	-0.00241168	-0.00237497	-0.00198283	-0.00196932		86596	-0.00198405	-0.00205412	0.00144147	-0.00241366	-0.00197248	-0.00208425	-0.00241165	-0.00237499	-0.00197725	-0.00196379
86597	-0.232681	-0.234304	-0.178167	-0.240045	-0.232375	-0.234227	-0.24009	-0.240146	-0.23275	-0.231928		86597	-0.124561	-0.123497	-0.158906	-0.116416	-0.124238	-0.123471	-0.116479	-0.116527	-0.124575	-0.123778		86597	-0.00198982	-0.00205423	-0.00386242	-0.00241369	-0.00197813	-0.00208436	-0.00241168	-0.00237497	-0.00198289	-0.00196938		86597	-0.00198405	-0.00205412	0.00144052	-0.00241366	-0.00197248	-0.00208425	-0.00241165	-0.00237499	-0.00197725	-0.00196379
86598	-0.233637	-0.235264	-0.17901	-0.241019	-0.233332	-0.235187	-0.241064	-0.24112	-0.233707	-0.232886		86598	-0.125127	-0.124061	-0.159798	-0.116924	-0.124805	-0.124035	-0.116988	-0.117035	-0.125141	-0.124346		86598	-0.00198987	-0.00205423	-0.00390637	-0.00241369	-0.00197818	-0.00208437	-0.00241168	-0.00237497	-0.00198294	-0.00196944		86598	-0.00198405	-0.00205412	0.00143957	-0.00241366	-0.00197249	-0.00208425	-0.00241165	-0.00237499	-0.00197725	-0.00196379
86599	-0.234591	-0.236222	-0.179852	-0.24199	-0.234286	-0.236144	-0.242035	-0.242091	-0.234661	-0.233842		86599	-0.125692	-0.124624	-0.160688	-0.117432	-0.12537	-0.124598	-0.117495	-0.117542	-0.125706	-0.124912		86599	-0.00198993	-0.00205423	-0.00395037	-0.00241369	-0.00197824	-0.00208437	-0.00241168	-0.00237497	-0.001983	-0.0019695		86599	-0.00198405	-0.00205412	0.00143861	-0.00241366	-0.00197249	-0.00208425	-0.00241165	-0.00237499	-0.00197725	-0.0019638
86600	-0.235542	-0.237177	-0.180692	-0.242958	-0.235238	-0.237098	-0.243003	-0.243059	-0.235612	-0.234795		86600	-0.126255	-0.125186	-0.161575	-0.117938	-0.125934	-0.125159	-0.118001	-0.118048	-0.126269	-0.125477		86600	-0.00198999	-0.00205423	-0.0039944	-0.00241369	-0.0019783	-0.00208437	-0.00241168	-0.00237497	-0.00198306	-0.00196956		86600	-0.00198405	-0.00205412	0.00143766	-0.00241366	-0.00197249	-0.00208425	-0.00241165	-0.00237499	-0.00197725	-0.0019638
86601	-0.23649	-0.238129	-0.181529	-0.243924	-0.236187	-0.23805	-0.243968	-0.244024	-0.236561	-0.235745		86601	-0.126816	-0.125746	-0.16246	-0.118443	-0.126497	-0.125719	-0.118506	-0.118553	-0.126831	-0.126041		86601	-0.00199005	-0.00205424	-0.00403848	-0.00241369	-0.00197836	-0.00208437	-0.00241168	-0.00237497	-0.00198312	-0.00196961		86601	-0.00198405	-0.00205412	0.0014367	-0.00241366	-0.00197249	-0.00208425	-0.00241165	-0.00237499	-0.00197725	-0.0019638
86602	-0.237436	-0.239079	-0.182365	-0.244887	-0.237134	-0.238999	-0.244931	-0.244987	-0.237506	-0.236692		86602	-0.127377	-0.126305	-0.163343	-0.118947	-0.127058	-0.126278	-0.119009	-0.119057	-0.127391	-0.126603		86602	-0.00199011	-0.00205424	-0.0040826	-0.00241369	-0.00197841	-0.00208437	-0.00241168	-0.00237497	-0.00198317	-0.00196967		86602	-0.00198405	-0.00205412	0.00143575	-0.00241366	-0.00197249	-0.00208425	-0.00241165	-0.00237499	-0.00197725	-0.0019638
86603	-0.238379	-0.240025	-0.183198	-0.245847	-0.238078	-0.239946	-0.24589	-0.245946	-0.23845	-0.237637		86603	-0.127935	-0.126862	-0.164224	-0.119449	-0.127617	-0.126835	-0.119512	-0.119559	-0.12795	-0.127163		86603	-0.00199016	-0.00205424	-0.00412676	-0.0024137	-0.00197847	-0.00208437	-0.00241168	-0.00237497	-0.00198323	-0.00196973		86603	-0.00198406	-0.00205412	0.00143479	-0.00241366	-0.00197249	-0.00208425	-0.00241165	-0.00237499	-0.00197726	-0.0019638
86604	-0.239319	-0.24097	-0.184029	-0.246804	-0.239019	-0.240889	-0.246847	-0.246903	-0.23939	-0.238579		86604	-0.128493	-0.127418	-0.165102	-0.119951	-0.128176	-0.12739	-0.120013	-0.120061	-0.128508	-0.127722		86604	-0.00199022	-0.00205424	-0.00417096	-0.0024137	-0.00197853	-0.00208437	-0.00241168	-0.00237497	-0.00198329	-0.00196979		86604	-0.00198406	-0.00205412	0.00143383	-0.00241366	-0.00197249	-0.00208425	-0.00241165	-0.00237499	-0.00197726	-0.0019638
86605	-0.240256	-0.241911	-0.184859	-0.247759	-0.239957	-0.24183	-0.247802	-0.247858	-0.240328	-0.239519		86605	-0.129049	-0.127973	-0.165978	-0.120451	-0.128732	-0.127945	-0.120513	-0.120561	-0.129064	-0.12828		86605	-0.00199028	-0.00205424	-0.00421519	-0.0024137	-0.00197859	-0.00208438	-0.00241168	-0.00237497	-0.00198334	-0.00196985		86605	-0.00198406	-0.00205412	0.00143287	-0.00241366	-0.00197249	-0.00208425	-0.00241165	-0.00237499	-0.00197726	-0.0019638
86606	-0.241191	-0.24285	-0.185686	-0.24871	-0.240893	-0.242769	-0.248753	-0.248809	-0.241263	-0.240456		86606	-0.129603	-0.128526	-0.166852	-0.120951	-0.129288	-0.128497	-0.121013	-0.12106	-0.129619	-0.128836		86606	-0.00199034	-0.00205424	-0.00425946	-0.0024137	-0.00197865	-0.00208438	-0.00241168	-0.00237497	-0.0019834	-0.00196991		86606	-0.00198406	-0.00205412	0.0014319	-0.00241366	-0.00197249	-0.00208425	-0.00241165	-0.00237499	-0.00197726	-0.0019638
86607	-0.242124	-0.243786	-0.186512	-0.24966	-0.241826	-0.243704	-0.249702	-0.249758	-0.242196	-0.24139		86607	-0.130157	-0.129078	-0.167723	-0.121449	-0.129842	-0.129049	-0.121511	-0.121558	-0.130172	-0.129391		86607	-0.0019904	-0.00205424	-0.00430377	-0.0024137	-0.00197871	-0.00208438	-0.00241168	-0.00237497	-0.00198346	-0.00196997		86607	-0.00198406	-0.00205412	0.00143094	-0.00241366	-0.00197249	-0.00208425	-0.00241165	-0.00237499	-0.00197726	-0.0019638
86608	-0.243054	-0.244719	-0.187335	-0.250606	-0.242757	-0.244637	-0.250649	-0.250704	-0.243126	-0.242321		86608	-0.130708	-0.129629	-0.168593	-0.121946	-0.130394	-0.129599	-0.122008	-0.122055	-0.130724	-0.129945		86608	-0.00199046	-0.00205425	-0.00434811	-0.0024137	-0.00197876	-0.00208438	-0.00241168	-0.00237497	-0.00198352	-0.00197003		86608	-0.00198406	-0.00205412	0.00142997	-0.00241366	-0.00197249	-0.00208425	-0.00241165	-0.00237499	-0.00197726	-0.0019638
86609	-0.243981	-0.24565	-0.188156	-0.25155	-0.243685	-0.245568	-0.251592	-0.251648	-0.244053	-0.24325		86609	-0.131259	-0.130178	-0.16946	-0.122442	-0.130946	-0.130148	-0.122503	-0.122551	-0.131275	-0.130497		86609	-0.00199052	-0.00205425	-0.00439248	-0.0024137	-0.00197882	-0.00208438	-0.00241168	-0.00237497	-0.00198358	-0.00197009		86609	-0.00198406	-0.00205412	0.00142901	-0.00241366	-0.0019725	-0.00208425	-0.00241165	-0.00237499	-0.00197726	-0.0019638
86610	-0.244905	-0.246578	-0.188976	-0.252491	-0.24461	-0.246496	-0.252533	-0.252589	-0.244978	-0.244177		86610	-0.131808	-0.130725	-0.170325	-0.122937	-0.131495	-0.130695	-0.122998	-0.123046	-0.131824	-0.131048		86610	-0.00199058	-0.00205425	-0.00443689	-0.0024137	-0.00197888	-0.00208438	-0.00241168	-0.00237497	-0.00198363	-0.00197014		86610	-0.00198406	-0.00205412	0.00142804	-0.00241366	-0.0019725	-0.00208425	-0.00241165	-0.00237499	-0.00197726	-0.00196381
86611	-0.245827	-0.247504	-0.189793	-0.253429	-0.245533	-0.247421	-0.253471	-0.253527	-0.2459	-0.2451		86611	-0.132355	-0.131272	-0.171188	-0.12343	-0.132044	-0.131241	-0.123492	-0.123539	-0.132372	-0.131597		86611	-0.00199064	-0.00205425	-0.00448133	-0.0024137	-0.00197894	-0.00208438	-0.00241168	-0.00237498	-0.00198369	-0.0019702		86611	-0.00198406	-0.00205412	0.00142707	-0.00241366	-0.0019725	-0.00208425	-0.00241165	-0.00237499	-0.00197726	-0.00196381
86612	-0.246747	-0.248427	-0.190609	-0.254365	-0.246453	-0.248344	-0.254407	-0.254462	-0.246819	-0.246022		86612	-0.132901	-0.131817	-0.172049	-0.123923	-0.132591	-0.131786	-0.123984	-0.124032	-0.132918	-0.132145		86612	-0.0019907	-0.00205425	-0.0045258	-0.0024137	-0.001979	-0.00208439	-0.00241168	-0.00237498	-0.00198375	-0.00197026		86612	-0.00198406	-0.00205412	0.0014261	-0.00241366	-0.0019725	-0.00208425	-0.00241165	-0.00237499	-0.00197726	-0.00196381
86613	-0.247663	-0.249348	-0.191422	-0.255298	-0.247371	-0.249264	-0.25534	-0.255395	-0.247736	-0.24694		86613	-0.133446	-0.13236	-0.172907	-0.124414	-0.133136	-0.132329	-0.124475	-0.124523	-0.133463	-0.132691		86613	-0.00199076	-0.00205425	-0.00457029	-0.0024137	-0.00197906	-0.00208439	-0.00241168	-0.00237498	-0.00198381	-0.00197033		86613	-0.00198406	-0.00205412	0.00142513	-0.00241366	-0.0019725	-0.00208425	-0.00241165	-0.00237499	-0.00197726	-0.00196381
86614	-0.248578	-0.250266	-0.192234	-0.256229	-0.248286	-0.250181	-0.25627	-0.256325	-0.248651	-0.247856		86614	-0.13399	-0.132903	-0.173764	-0.124905	-0.133681	-0.132871	-0.124966	-0.125013	-0.134006	-0.133237		86614	-0.00199082	-0.00205425	-0.00461482	-0.0024137	-0.00197912	-0.00208439	-0.00241168	-0.00237498	-0.00198387	-0.00197039		86614	-0.00198407	-0.00205412	0.00142415	-0.00241366	-0.0019725	-0.00208425	-0.00241165	-0.00237499	-0.00197726	-0.00196381
86615	-0.249489	-0.251181	-0.193043	-0.257156	-0.249199	-0.251096	-0.257198	-0.257253	-0.249563	-0.24877		86615	-0.134532	-0.133444	-0.174618	-0.125394	-0.134223	-0.133412	-0.125455	-0.125503	-0.134549	-0.13378		86615	-0.00199088	-0.00205426	-0.00465938	-0.0024137	-0.00197918	-0.00208439	-0.00241168	-0.00237498	-0.00198393	-0.00197045		86615	-0.00198407	-0.00205412	0.00142318	-0.00241366	-0.0019725	-0.00208425	-0.00241165	-0.00237499	-0.00197727	-0.00196381
86616	-0.250398	-0.252094	-0.193851	-0.258082	-0.250109	-0.252008	-0.258123	-0.258178	-0.250472	-0.249681		86616	-0.135072	-0.133983	-0.17547	-0.125882	-0.134765	-0.133951	-0.125943	-0.125991	-0.135089	-0.134323		86616	-0.00199094	-0.00205426	-0.00470396	-0.0024137	-0.00197924	-0.00208439	-0.00241168	-0.00237498	-0.00198399	-0.00197051		86616	-0.00198407	-0.00205412	0.00142221	-0.00241366	-0.0019725	-0.00208425	-0.00241165	-0.00237499	-0.00197727	-0.00196381
86617	-0.251305	-0.253004	-0.194657	-0.259004	-0.251016	-0.252918	-0.259045	-0.2591	-0.251379	-0.250589		86617	-0.135612	-0.134521	-0.17632	-0.126369	-0.135305	-0.134489	-0.12643	-0.126478	-0.135629	-0.134864		86617	-0.001991	-0.00205426	-0.00474857	-0.0024137	-0.0019793	-0.00208439	-0.00241168	-0.00237498	-0.00198405	-0.00197057		86617	-0.00198407	-0.00205412	0.00142123	-0.00241366	-0.0019725	-0.00208425	-0.00241165	-0.00237499	-0.00197727	-0.00196381
86618	-0.252209	-0.253912	-0.195461	-0.259924	-0.251921	-0.253826	-0.259965	-0.26002	-0.252283	-0.251495		86618	-0.136149	-0.135058	-0.177168	-0.126855	-0.135843	-0.135026	-0.126916	-0.126964	-0.136167	-0.135403		86618	-0.00199106	-0.00205426	-0.00479321	-0.0024137	-0.00197936	-0.00208439	-0.00241168	-0.00237498	-0.00198411	-0.00197063		86618	-0.00198407	-0.00205412	0.00142025	-0.00241366	-0.0019725	-0.00208425	-0.00241165	-0.00237499	-0.00197727	-0.00196381
86619	-0.253111	-0.254817	-0.196263	-0.260842	-0.252823	-0.25473	-0.260882	-0.260938	-0.253185	-0.252398		86619	-0.136686	-0.135594	-0.178014	-0.12734	-0.136381	-0.135561	-0.1274	-0.127448	-0.136703	-0.135941		86619	-0.00199112	-0.00205426	-0.00483787	-0.0024137	-0.00197942	-0.0020844	-0.00241168	-0.00237498	-0.00198417	-0.00197069		86619	-0.00198407	-0.00205412	0.00141927	-0.00241366	-0.0019725	-0.00208425	-0.00241165	-0.00237499	-0.00197727	-0.00196381
86620	-0.25401	-0.25572	-0.197063	-0.261757	-0.253723	-0.255633	-0.261797	-0.261852	-0.254084	-0.253299		86620	-0.137221	-0.136128	-0.178858	-0.127824	-0.136917	-0.136095	-0.127884	-0.127932	-0.137239	-0.136478		86620	-0.00199118	-0.00205426	-0.00488255	-0.0024137	-0.00197948	-0.0020844	-0.00241169	-0.00237498	-0.00198423	-0.00197075		86620	-0.00198407	-0.00205412	0.00141829	-0.00241366	-0.00197251	-0.00208425	-0.00241165	-0.00237499	-0.00197727	-0.00196381
86621	-0.254907	-0.25662	-0.197861	-0.262669	-0.254621	-0.256533	-0.262709	-0.262764	-0.254981	-0.254197		86621	-0.137755	-0.13666	-0.1797	-0.128307	-0.137451	-0.136627	-0.128367	-0.128415	-0.137773	-0.137013		86621	-0.00199124	-0.00205426	-0.00492726	-0.0024137	-0.00197954	-0.0020844	-0.00241169	-0.00237498	-0.00198429	-0.00197081		86621	-0.00198407	-0.00205412	0.00141731	-0.00241366	-0.00197251	-0.00208425	-0.00241165	-0.00237499	-0.00197727	-0.00196382
86622	-0.255801	-0.257517	-0.198657	-0.263579	-0.255516	-0.25743	-0.263619	-0.263674	-0.255875	-0.255093		86622	-0.138287	-0.137192	-0.180539	-0.128788	-0.137984	-0.137158	-0.128848	-0.128896	-0.138305	-0.137548		86622	-0.0019913	-0.00205427	-0.00497199	-0.0024137	-0.00197961	-0.0020844	-0.00241169	-0.00237498	-0.00198435	-0.00197087		86622	-0.00198407	-0.00205412	0.00141633	-0.00241366	-0.00197251	-0.00208425	-0.00241165	-0.00237499	-0.00197727	-0.00196382
86623	-0.256693	-0.258413	-0.199452	-0.264486	-0.256408	-0.258325	-0.264526	-0.264581	-0.256767	-0.255987		86623	-0.138818	-0.137722	-0.181377	-0.129269	-0.138516	-0.137688	-0.129329	-0.129377	-0.138836	-0.13808		86623	-0.00199137	-0.00205427	-0.00501674	-0.0024137	-0.00197967	-0.0020844	-0.00241169	-0.00237498	-0.00198441	-0.00197094		86623	-0.00198407	-0.00205412	0.00141535	-0.00241366	-0.00197251	-0.00208425	-0.00241165	-0.00237499	-0.00197727	-0.00196382
86624	-0.257582	-0.259305	-0.200244	-0.265391	-0.257298	-0.259217	-0.26543	-0.265486	-0.257657	-0.256878		86624	-0.139348	-0.138251	-0.182213	-0.129748	-0.139047	-0.138217	-0.129808	-0.129856	-0.139366	-0.138612		86624	-0.00199143	-0.00205427	-0.00506151	-0.0024137	-0.00197973	-0.0020844	-0.00241169	-0.00237498	-0.00198447	-0.001971		86624	-0.00198407	-0.00205412	0.00141437	-0.00241366	-0.00197251	-0.00208425	-0.00241165	-0.00237499	-0.00197727	-0.00196382
86625	-0.258469	-0.260196	-0.201035	-0.266294	-0.258186	-0.260107	-0.266332	-0.266388	-0.258544	-0.257766		86625	-0.139876	-0.138778	-0.183046	-0.130227	-0.139576	-0.138744	-0.130286	-0.130334	-0.139895	-0.139141		86625	-0.00199149	-0.00205427	-0.0051063	-0.0024137	-0.00197979	-0.0020844	-0.00241169	-0.00237498	-0.00198453	-0.00197106		86625	-0.00198408	-0.00205412	0.00141338	-0.00241366	-0.00197251	-0.00208425	-0.00241165	-0.00237499	-0.00197727	-0.00196382
86626	-0.259353	-0.261084	-0.201824	-0.267193	-0.259071	-0.260995	-0.267232	-0.267287	-0.259428	-0.258652		86626	-0.140403	-0.139304	-0.183878	-0.130704	-0.140103	-0.139269	-0.130764	-0.130812	-0.140422	-0.13967		86626	-0.00199155	-0.00205427	-0.00515111	-0.0024137	-0.00197985	-0.00208441	-0.00241169	-0.00237498	-0.00198459	-0.00197112		86626	-0.00198408	-0.00205412	0.00141239	-0.00241366	-0.00197251	-0.00208425	-0.00241165	-0.00237499	-0.00197728	-0.00196382
86627	-0.260235	-0.261969	-0.202611	-0.268091	-0.259954	-0.26188	-0.268129	-0.268184	-0.26031	-0.259536		86627	-0.140928	-0.139829	-0.184707	-0.13118	-0.14063	-0.139794	-0.13124	-0.131288	-0.140947	-0.140197		86627	-0.00199161	-0.00205427	-0.00519594	-0.0024137	-0.00197991	-0.00208441	-0.00241169	-0.00237498	-0.00198465	-0.00197118		86627	-0.00198408	-0.00205412	0.00141141	-0.00241366	-0.00197251	-0.00208425	-0.00241165	-0.00237499	-0.00197728	-0.00196382
86628	-0.261115	-0.262852	-0.203396	-0.268985	-0.260834	-0.262762	-0.269024	-0.269079	-0.26119	-0.260417		86628	-0.141453	-0.140352	-0.185535	-0.131656	-0.141155	-0.140317	-0.131715	-0.131763	-0.141472	-0.140723		86628	-0.00199168	-0.00205428	-0.00524079	-0.0024137	-0.00197997	-0.00208441	-0.00241169	-0.00237498	-0.00198471	-0.00197125		86628	-0.00198408	-0.00205412	0.00141042	-0.00241366	-0.00197251	-0.00208425	-0.00241165	-0.00237499	-0.00197728	-0.00196382
86629	-0.261992	-0.263733	-0.20418	-0.269878	-0.261712	-0.263642	-0.269916	-0.269971	-0.262068	-0.261296		86629	-0.141976	-0.140875	-0.18636	-0.13213	-0.141678	-0.140839	-0.132189	-0.132237	-0.141995	-0.141248		86629	-0.00199174	-0.00205428	-0.00528566	-0.0024137	-0.00198004	-0.00208441	-0.00241169	-0.00237498	-0.00198477	-0.00197131		86629	-0.00198408	-0.00205412	0.00140943	-0.00241366	-0.00197251	-0.00208425	-0.00241165	-0.00237499	-0.00197728	-0.00196382
86630	-0.262867	-0.264611	-0.204961	-0.270768	-0.262588	-0.26452	-0.270806	-0.270861	-0.262943	-0.262172		86630	-0.142497	-0.141395	-0.187183	-0.132603	-0.142201	-0.141359	-0.132662	-0.13271	-0.142517	-0.141771		86630	-0.0019918	-0.00205428	-0.00533054	-0.0024137	-0.0019801	-0.00208441	-0.00241169	-0.00237498	-0.00198483	-0.00197137		86630	-0.00198408	-0.00205412	0.00140844	-0.00241366	-0.00197251	-0.00208425	-0.00241165	-0.00237499	-0.00197728	-0.00196382
86631	-0.263739	-0.265487	-0.205741	-0.271655	-0.263461	-0.265396	-0.271693	-0.271748	-0.263815	-0.263046		86631	-0.143017	-0.141915	-0.188005	-0.133075	-0.142722	-0.141879	-0.133134	-0.133182	-0.143037	-0.142293		86631	-0.00199186	-0.00205428	-0.00537544	-0.0024137	-0.00198016	-0.00208441	-0.00241169	-0.00237498	-0.00198489	-0.00197143		86631	-0.00198408	-0.00205412	0.00140745	-0.00241366	-0.00197252	-0.00208425	-0.00241165	-0.00237499	-0.00197728	-0.00196382
86632	-0.264609	-0.26636	-0.206519	-0.27254	-0.264332	-0.266269	-0.272578	-0.272633	-0.264685	-0.263918		86632	-0.143536	-0.142433	-0.188824	-0.133546	-0.143241	-0.142397	-0.133604	-0.133653	-0.143556	-0.142813		86632	-0.00199192	-0.00205428	-0.00542035	-0.0024137	-0.00198022	-0.00208442	-0.00241169	-0.00237498	-0.00198495	-0.0019715		86632	-0.00198408	-0.00205412	0.00140646	-0.00241366	-0.00197252	-0.00208425	-0.00241165	-0.00237499	-0.00197728	-0.00196383
86633	-0.265477	-0.267231	-0.207295	-0.273423	-0.2652	-0.267139	-0.27346	-0.273515	-0.265553	-0.264787		86633	-0.144054	-0.14295	-0.189642	-0.134016	-0.14376	-0.142913	-0.134074	-0.134122	-0.144074	-0.143332		86633	-0.00199199	-0.00205428	-0.00546528	-0.0024137	-0.00198028	-0.00208442	-0.00241169	-0.00237498	-0.00198501	-0.00197156		86633	-0.00198408	-0.00205412	0.00140547	-0.00241366	-0.00197252	-0.00208425	-0.00241165	-0.00237499	-0.00197728	-0.00196383
86634	-0.266342	-0.2681	-0.20807	-0.274303	-0.266066	-0.268008	-0.27434	-0.274395	-0.266419	-0.265654		86634	-0.14457	-0.143465	-0.190457	-0.134485	-0.144276	-0.143428	-0.134543	-0.134591	-0.14459	-0.14385		86634	-0.00199205	-0.00205428	-0.00551022	-0.0024137	-0.00198035	-0.00208442	-0.00241169	-0.00237498	-0.00198508	-0.00197162		86634	-0.00198408	-0.00205412	0.00140447	-0.00241366	-0.00197252	-0.00208425	-0.00241165	-0.00237499	-0.00197728	-0.00196383
86635	-0.267205	-0.268966	-0.208842	-0.275181	-0.26693	-0.268874	-0.275218	-0.275273	-0.267282	-0.266519		86635	-0.145085	-0.14398	-0.191271	-0.134953	-0.144792	-0.143942	-0.135011	-0.135059	-0.145105	-0.144367		86635	-0.00199211	-0.00205429	-0.00555518	-0.0024137	-0.00198041	-0.00208442	-0.00241169	-0.00237498	-0.00198514	-0.00197169		86635	-0.00198409	-0.00205412	0.00140348	-0.00241366	-0.00197252	-0.00208425	-0.00241165	-0.00237499	-0.00197728	-0.00196383
86636	-0.268066	-0.26983	-0.209613	-0.276056	-0.267791	-0.269737	-0.276093	-0.276148	-0.268143	-0.267381		86636	-0.145598	-0.144492	-0.192083	-0.135419	-0.145306	-0.144455	-0.135477	-0.135526	-0.145619	-0.144882		86636	-0.00199218	-0.00205429	-0.00560015	-0.0024137	-0.00198047	-0.00208442	-0.00241169	-0.00237498	-0.0019852	-0.00197175		86636	-0.00198409	-0.00205412	0.00140249	-0.00241366	-0.00197252	-0.00208425	-0.00241165	-0.00237499	-0.00197729	-0.00196383
86637	-0.268924	-0.270692	-0.210382	-0.276929	-0.26865	-0.270598	-0.276966	-0.27702	-0.269001	-0.268241		86637	-0.14611	-0.145004	-0.192892	-0.135885	-0.145819	-0.144966	-0.135943	-0.135991	-0.146131	-0.145396		86637	-0.00199224	-0.00205429	-0.00564513	-0.0024137	-0.00198054	-0.00208442	-0.00241169	-0.00237498	-0.00198526	-0.00197181		86637	-0.00198409	-0.00205412	0.00140149	-0.00241366	-0.00197252	-0.00208425	-0.00241165	-0.00237499	-0.00197729	-0.00196383
86638	-0.26978	-0.271551	-0.211149	-0.2778	-0.269507	-0.271457	-0.277836	-0.277891	-0.269857	-0.269099		86638	-0.146621	-0.145514	-0.1937	-0.13635	-0.146331	-0.145476	-0.136408	-0.136456	-0.146642	-0.145908		86638	-0.0019923	-0.00205429	-0.00569012	-0.0024137	-0.0019806	-0.00208442	-0.00241169	-0.00237498	-0.00198532	-0.00197188		86638	-0.00198409	-0.00205412	0.00140049	-0.00241366	-0.00197252	-0.00208425	-0.00241165	-0.00237499	-0.00197729	-0.00196383
86639	-0.270634	-0.272408	-0.211915	-0.278668	-0.270362	-0.272314	-0.278704	-0.278759	-0.270711	-0.269954		86639	-0.147131	-0.146023	-0.194506	-0.136814	-0.146841	-0.145985	-0.136871	-0.13692	-0.147152	-0.146419		86639	-0.00199237	-0.00205429	-0.00573512	-0.0024137	-0.00198066	-0.00208443	-0.00241169	-0.00237498	-0.00198538	-0.00197194		86639	-0.00198409	-0.00205412	0.00139949	-0.00241366	-0.00197252	-0.00208425	-0.00241165	-0.00237499	-0.00197729	-0.00196383
86640	-0.271485	-0.273263	-0.212679	-0.279534	-0.271214	-0.273168	-0.27957	-0.279625	-0.271563	-0.270807		86640	-0.147639	-0.146531	-0.19531	-0.137276	-0.14735	-0.146493	-0.137334	-0.137382	-0.14766	-0.146929		86640	-0.00199243	-0.00205429	-0.00578013	-0.00241371	-0.00198072	-0.00208443	-0.00241169	-0.00237498	-0.00198545	-0.001972		86640	-0.00198409	-0.00205412	0.0013985	-0.00241366	-0.00197252	-0.00208425	-0.00241165	-0.00237499	-0.00197729	-0.00196383
86641	-0.272334	-0.274115	-0.213441	-0.280398	-0.272064	-0.27402	-0.280433	-0.280488	-0.272412	-0.271658		86641	-0.148146	-0.147038	-0.196112	-0.137738	-0.147858	-0.146999	-0.137795	-0.137844	-0.148167	-0.147438		86641	-0.00199249	-0.0020543	-0.00582515	-0.00241371	-0.00198079	-0.00208443	-0.00241169	-0.00237498	-0.00198551	-0.00197207		86641	-0.00198409	-0.00205412	0.0013975	-0.00241366	-0.00197253	-0.00208425	-0.00241165	-0.00237499	-0.00197729	-0.00196383
86642	-0.273181	-0.274965	-0.214201	-0.281259	-0.272911	-0.27487	-0.281294	-0.281349	-0.273259	-0.272506		86642	-0.148652	-0.147543	-0.196912	-0.138198	-0.148365	-0.147504	-0.138256	-0.138304	-0.148673	-0.147945		86642	-0.00199256	-0.0020543	-0.00587018	-0.00241371	-0.00198085	-0.00208443	-0.00241169	-0.00237498	-0.00198557	-0.00197213		86642	-0.00198409	-0.00205412	0.0013965	-0.00241366	-0.00197253	-0.00208425	-0.00241165	-0.00237499	-0.00197729	-0.00196384
86643	-0.274026	-0.275813	-0.21496	-0.282118	-0.273757	-0.275718	-0.282153	-0.282208	-0.274104	-0.273352		86643	-0.149156	-0.148047	-0.197711	-0.138658	-0.14887	-0.148007	-0.138715	-0.138764	-0.149178	-0.148451		86643	-0.00199262	-0.0020543	-0.00591522	-0.00241371	-0.00198091	-0.00208443	-0.00241169	-0.00237498	-0.00198563	-0.0019722		86643	-0.00198409	-0.00205412	0.0013955	-0.00241366	-0.00197253	-0.00208425	-0.00241165	-0.00237499	-0.00197729	-0.00196384
86644	-0.274868	-0.276659	-0.215717	-0.282974	-0.2746	-0.276563	-0.283009	-0.283064	-0.274947	-0.274196		86644	-0.149659	-0.148549	-0.198507	-0.139117	-0.149374	-0.14851	-0.139174	-0.139222	-0.149681	-0.148956		86644	-0.00199268	-0.0020543	-0.00596027	-0.00241371	-0.00198098	-0.00208443	-0.00241169	-0.00237498	-0.0019857	-0.00197226		86644	-0.00198409	-0.00205412	0.0013945	-0.00241366	-0.00197253	-0.00208425	-0.00241165	-0.00237499	-0.00197729	-0.00196384
86645	-0.275708	-0.277502	-0.216472	-0.283829	-0.27544	-0.277406	-0.283864	-0.283918	-0.275787	-0.275038		86645	-0.150161	-0.149051	-0.199301	-0.139574	-0.149876	-0.149011	-0.139631	-0.139679	-0.150183	-0.149459		86645	-0.00199275	-0.0020543	-0.00600533	-0.00241371	-0.00198104	-0.00208444	-0.00241169	-0.00237499	-0.00198576	-0.00197233		86645	-0.0019841	-0.00205412	0.00139349	-0.00241366	-0.00197253	-0.00208425	-0.00241165	-0.00237499	-0.00197729	-0.00196384
86646	-0.276546	-0.278343	-0.217225	-0.284681	-0.276279	-0.278247	-0.284715	-0.28477	-0.276625	-0.275877		86646	-0.150661	-0.149551	-0.200094	-0.140031	-0.150377	-0.149511	-0.140087	-0.140136	-0.150684	-0.149961		86646	-0.00199281	-0.0020543	-0.00605039	-0.00241371	-0.00198111	-0.00208444	-0.00241169	-0.00237499	-0.00198582	-0.00197239		86646	-0.0019841	-0.00205412	0.00139249	-0.00241366	-0.00197253	-0.00208425	-0.00241165	-0.00237499	-0.00197729	-0.00196384
86647	-0.277382	-0.279182	-0.217977	-0.28553	-0.277115	-0.279085	-0.285565	-0.28562	-0.277461	-0.276714		86647	-0.151161	-0.15005	-0.200885	-0.140486	-0.150877	-0.150009	-0.140543	-0.140591	-0.151183	-0.150462		86647	-0.00199288	-0.00205431	-0.00609545	-0.00241371	-0.00198117	-0.00208444	-0.00241169	-0.00237499	-0.00198588	-0.00197245		86647	-0.0019841	-0.00205412	0.00139149	-0.00241366	-0.00197253	-0.00208425	-0.00241165	-0.00237499	-0.0019773	-0.00196384
86648	-0.278215	-0.280018	-0.218727	-0.286378	-0.27795	-0.279921	-0.286412	-0.286467	-0.278294	-0.277549		86648	-0.151658	-0.150547	-0.201674	-0.140941	-0.151376	-0.150507	-0.140997	-0.141046	-0.151681	-0.150962		86648	-0.00199294	-0.00205431	-0.00614053	-0.00241371	-0.00198123	-0.00208444	-0.00241169	-0.00237499	-0.00198595	-0.00197252		86648	-0.0019841	-0.00205412	0.00139048	-0.00241366	-0.00197253	-0.00208425	-0.00241165	-0.00237499	-0.0019773	-0.00196384
86649	-0.279047	-0.280853	-0.219476	-0.287223	-0.278782	-0.280755	-0.287257	-0.287312	-0.279126	-0.278382		86649	-0.152155	-0.151043	-0.202461	-0.141394	-0.151873	-0.151003	-0.141451	-0.141499	-0.152178	-0.15146		86649	-0.00199301	-0.00205431	-0.00618561	-0.00241371	-0.0019813	-0.00208444	-0.00241169	-0.00237499	-0.00198601	-0.00197258		86649	-0.0019841	-0.00205412	0.00138948	-0.00241366	-0.00197253	-0.00208425	-0.00241165	-0.00237499	-0.0019773	-0.00196384
86650	-0.279876	-0.281685	-0.220222	-0.288066	-0.279611	-0.281587	-0.2881	-0.288154	-0.279955	-0.279213		86650	-0.15265	-0.151538	-0.203246	-0.141847	-0.152369	-0.151497	-0.141903	-0.141952	-0.152673	-0.151957		86650	-0.00199307	-0.00205431	-0.00623069	-0.00241371	-0.00198136	-0.00208444	-0.00241169	-0.00237499	-0.00198607	-0.00197265		86650	-0.0019841	-0.00205412	0.00138847	-0.00241366	-0.00197253	-0.00208425	-0.00241165	-0.00237499	-0.0019773	-0.00196384
86651	-0.280702	-0.282515	-0.220967	-0.288907	-0.280439	-0.282417	-0.28894	-0.288995	-0.280782	-0.280041		86651	-0.153145	-0.152032	-0.20403	-0.142298	-0.152864	-0.151991	-0.142354	-0.142403	-0.153168	-0.152452		86651	-0.00199313	-0.00205431	-0.00627578	-0.00241371	-0.00198143	-0.00208445	-0.0024117	-0.00237499	-0.00198614	-0.00197271		86651	-0.0019841	-0.00205412	0.00138746	-0.00241366	-0.00197254	-0.00208425	-0.00241165	-0.00237499	-0.0019773	-0.00196384
86652	-0.281527	-0.283343	-0.221711	-0.289745	-0.281264	-0.283244	-0.289779	-0.289833	-0.281607	-0.280867		86652	-0.153637	-0.152525	-0.204811	-0.142749	-0.153358	-0.152483	-0.142805	-0.142853	-0.153661	-0.152947		86652	-0.0019932	-0.00205431	-0.00632087	-0.00241371	-0.00198149	-0.00208445	-0.0024117	-0.00237499	-0.0019862	-0.00197278		86652	-0.0019841	-0.00205412	0.00138646	-0.00241366	-0.00197254	-0.00208425	-0.00241165	-0.00237499	-0.0019773	-0.00196385
86653	-0.28235	-0.284168	-0.222453	-0.290581	-0.282087	-0.284069	-0.290615	-0.290669	-0.282429	-0.281691		86653	-0.154129	-0.153016	-0.205591	-0.143198	-0.15385	-0.152974	-0.143254	-0.143303	-0.154152	-0.15344		86653	-0.00199326	-0.00205432	-0.00636596	-0.00241371	-0.00198156	-0.00208445	-0.0024117	-0.00237499	-0.00198626	-0.00197284		86653	-0.0019841	-0.00205412	0.00138545	-0.00241366	-0.00197254	-0.00208425	-0.00241165	-0.00237499	-0.0019773	-0.00196385
86654	-0.28317	-0.284992	-0.223193	-0.291415	-0.282908	-0.284892	-0.291449	-0.291503	-0.28325	-0.282513		86654	-0.154619	-0.153506	-0.206369	-0.143647	-0.154341	-0.153464	-0.143702	-0.143751	-0.154643	-0.153932		86654	-0.00199333	-0.00205432	-0.00641106	-0.00241371	-0.00198162	-0.00208445	-0.0024117	-0.00237499	-0.00198633	-0.00197291		86654	-0.0019841	-0.00205412	0.00138444	-0.00241366	-0.00197254	-0.00208425	-0.00241165	-0.00237499	-0.0019773	-0.00196385
86655	-0.283988	-0.285813	-0.223931	-0.292247	-0.283727	-0.285713	-0.29228	-0.292335	-0.284068	-0.283333		86655	-0.155108	-0.153995	-0.207145	-0.144094	-0.154831	-0.153953	-0.14415	-0.144199	-0.155132	-0.154422		86655	-0.00199339	-0.00205432	-0.00645615	-0.00241371	-0.00198169	-0.00208445	-0.0024117	-0.00237499	-0.00198639	-0.00197298		86655	-0.00198411	-0.00205412	0.00138343	-0.00241366	-0.00197254	-0.00208425	-0.00241165	-0.00237499	-0.0019773	-0.00196385
86656	-0.284804	-0.286632	-0.224668	-0.293077	-0.284544	-0.286532	-0.29311	-0.293164	-0.284884	-0.28415		86656	-0.155596	-0.154482	-0.20792	-0.144541	-0.155319	-0.15444	-0.144596	-0.144645	-0.15562	-0.154912		86656	-0.00199346	-0.00205432	-0.00650125	-0.00241371	-0.00198175	-0.00208445	-0.0024117	-0.00237499	-0.00198645	-0.00197304		86656	-0.00198411	-0.00205412	0.00138242	-0.00241366	-0.00197254	-0.00208425	-0.00241165	-0.00237499	-0.0019773	-0.00196385
86657	-0.285618	-0.287449	-0.225403	-0.293904	-0.285358	-0.287349	-0.293937	-0.293991	-0.285698	-0.284965		86657	-0.156082	-0.154969	-0.208692	-0.144986	-0.155807	-0.154926	-0.145042	-0.145091	-0.156107	-0.1554		86657	-0.00199352	-0.00205432	-0.00654636	-0.00241371	-0.00198181	-0.00208446	-0.0024117	-0.00237499	-0.00198652	-0.00197311		86657	-0.00198411	-0.00205412	0.00138141	-0.00241366	-0.00197254	-0.00208425	-0.00241165	-0.00237499	-0.00197731	-0.00196385
86658	-0.28643	-0.288264	-0.226137	-0.29473	-0.286171	-0.288163	-0.294762	-0.294816	-0.28651	-0.285779		86658	-0.156568	-0.155454	-0.209463	-0.145431	-0.156293	-0.155411	-0.145486	-0.145535	-0.156592	-0.155886		86658	-0.00199359	-0.00205432	-0.00659146	-0.00241371	-0.00198188	-0.00208446	-0.0024117	-0.00237499	-0.00198658	-0.00197317		86658	-0.00198411	-0.00205412	0.0013804	-0.00241366	-0.00197254	-0.00208425	-0.00241165	-0.00237499	-0.00197731	-0.00196385
86659	-0.28724	-0.289076	-0.226869	-0.295553	-0.286981	-0.288976	-0.295585	-0.295639	-0.28732	-0.28659		86659	-0.157052	-0.155938	-0.210232	-0.145875	-0.156777	-0.155895	-0.14593	-0.145979	-0.157076	-0.156372		86659	-0.00199365	-0.00205433	-0.00663656	-0.00241371	-0.00198194	-0.00208446	-0.0024117	-0.00237499	-0.00198665	-0.00197324		86659	-0.00198411	-0.00205412	0.00137939	-0.00241366	-0.00197254	-0.00208425	-0.00241165	-0.00237499	-0.00197731	-0.00196385
86660	-0.288047	-0.289887	-0.227599	-0.296374	-0.287789	-0.289786	-0.296406	-0.29646	-0.288128	-0.287399		86660	-0.157535	-0.15642	-0.211	-0.146317	-0.157261	-0.156377	-0.146372	-0.146421	-0.157559	-0.156856		86660	-0.00199372	-0.00205433	-0.00668166	-0.00241371	-0.00198201	-0.00208446	-0.0024117	-0.00237499	-0.00198671	-0.0019733		86660	-0.00198411	-0.00205412	0.00137838	-0.00241366	-0.00197254	-0.00208425	-0.00241165	-0.00237499	-0.00197731	-0.00196385
86661	-0.288853	-0.290695	-0.228328	-0.297192	-0.288596	-0.290594	-0.297224	-0.297278	-0.288933	-0.288206		86661	-0.158016	-0.156902	-0.211765	-0.146759	-0.157743	-0.156858	-0.146814	-0.146863	-0.158041	-0.157339		86661	-0.00199379	-0.00205433	-0.00672676	-0.00241371	-0.00198208	-0.00208446	-0.0024117	-0.00237499	-0.00198677	-0.00197337		86661	-0.00198411	-0.00205412	0.00137736	-0.00241366	-0.00197255	-0.00208425	-0.00241165	-0.00237499	-0.00197731	-0.00196386
86662	-0.289656	-0.291502	-0.229055	-0.298009	-0.2894	-0.2914	-0.298041	-0.298095	-0.289737	-0.28901		86662	-0.158496	-0.157382	-0.212529	-0.1472	-0.158224	-0.157338	-0.147254	-0.147303	-0.158521	-0.157821		86662	-0.00199385	-0.00205433	-0.00677186	-0.00241371	-0.00198214	-0.00208446	-0.0024117	-0.00237499	-0.00198684	-0.00197344		86662	-0.00198411	-0.00205412	0.00137635	-0.00241366	-0.00197255	-0.00208425	-0.00241165	-0.00237499	-0.00197731	-0.00196386
86663	-0.290457	-0.292306	-0.22978	-0.298823	-0.290202	-0.292204	-0.298855	-0.298909	-0.290538	-0.289813		86663	-0.158975	-0.157861	-0.213291	-0.147639	-0.158704	-0.157817	-0.147694	-0.147743	-0.159001	-0.158302		86663	-0.00199392	-0.00205433	-0.00681696	-0.00241371	-0.00198221	-0.00208447	-0.0024117	-0.00237499	-0.0019869	-0.0019735		86663	-0.00198411	-0.00205412	0.00137534	-0.00241366	-0.00197255	-0.00208425	-0.00241165	-0.00237499	-0.00197731	-0.00196386
86664	-0.291256	-0.293108	-0.230504	-0.299636	-0.291001	-0.293006	-0.299667	-0.299721	-0.291338	-0.290614		86664	-0.159453	-0.158339	-0.214052	-0.148078	-0.159183	-0.158295	-0.148133	-0.148182	-0.159479	-0.158781		86664	-0.00199398	-0.00205433	-0.00686206	-0.00241371	-0.00198227	-0.00208447	-0.0024117	-0.00237499	-0.00198697	-0.00197357		86664	-0.00198411	-0.00205412	0.00137432	-0.00241366	-0.00197255	-0.00208425	-0.00241165	-0.00237499	-0.00197731	-0.00196386
86665	-0.292054	-0.293908	-0.231227	-0.300446	-0.291799	-0.293805	-0.300477	-0.300531	-0.292135	-0.291412		86665	-0.15993	-0.158815	-0.21481	-0.148516	-0.15966	-0.158771	-0.14857	-0.148619	-0.159955	-0.159259		86665	-0.00199405	-0.00205434	-0.00690715	-0.00241371	-0.00198234	-0.00208447	-0.0024117	-0.00237499	-0.00198703	-0.00197363		86665	-0.00198412	-0.00205412	0.00137331	-0.00241366	-0.00197255	-0.00208425	-0.00241165	-0.00237499	-0.00197731	-0.00196386
86666	-0.292849	-0.294706	-0.231947	-0.301254	-0.292595	-0.294603	-0.301285	-0.301339	-0.29293	-0.292209		86666	-0.160405	-0.159291	-0.215567	-0.148953	-0.160136	-0.159246	-0.149007	-0.149056	-0.160431	-0.159736		86666	-0.00199411	-0.00205434	-0.00695224	-0.00241371	-0.0019824	-0.00208447	-0.0024117	-0.00237499	-0.00198709	-0.0019737		86666	-0.00198412	-0.00205412	0.00137229	-0.00241366	-0.00197255	-0.00208425	-0.00241165	-0.00237499	-0.00197732	-0.00196386
86667	-0.293642	-0.295502	-0.232667	-0.30206	-0.293389	-0.295399	-0.302091	-0.302145	-0.293723	-0.293003		86667	-0.16088	-0.159765	-0.216322	-0.149389	-0.160611	-0.15972	-0.149443	-0.149492	-0.160905	-0.160212		86667	-0.00199418	-0.00205434	-0.00699733	-0.00241371	-0.00198247	-0.00208447	-0.0024117	-0.00237499	-0.00198716	-0.00197377		86667	-0.00198412	-0.00205412	0.00137127	-0.00241366	-0.00197255	-0.00208425	-0.00241165	-0.00237499	-0.00197732	-0.00196386
86668	-0.294433	-0.296296	-0.233384	-0.302864	-0.29418	-0.296192	-0.302895	-0.302949	-0.294515	-0.293796		86668	-0.161353	-0.160238	-0.217076	-0.149824	-0.161085	-0.160193	-0.149878	-0.149927	-0.161378	-0.160687		86668	-0.00199425	-0.00205434	-0.00704242	-0.00241371	-0.00198253	-0.00208447	-0.0024117	-0.00237499	-0.00198722	-0.00197383		86668	-0.00198412	-0.00205412	0.00137026	-0.00241366	-0.00197255	-0.00208425	-0.00241165	-0.00237499	-0.00197732	-0.00196386
86669	-0.295222	-0.297088	-0.2341	-0.303666	-0.29497	-0.296984	-0.303697	-0.303751	-0.295304	-0.294586		86669	-0.161824	-0.16071	-0.217828	-0.150258	-0.161557	-0.160664	-0.150312	-0.150361	-0.16185	-0.16116		86669	-0.00199431	-0.00205434	-0.0070875	-0.00241371	-0.0019826	-0.00208448	-0.0024117	-0.00237499	-0.00198729	-0.0019739		86669	-0.00198412	-0.00205412	0.00136924	-0.00241366	-0.00197255	-0.00208425	-0.00241165	-0.00237499	-0.00197732	-0.00196386
86670	-0.296008	-0.297878	-0.234815	-0.304466	-0.295757	-0.297773	-0.304496	-0.30455	-0.296091	-0.295374		86670	-0.162295	-0.16118	-0.218578	-0.150691	-0.162029	-0.161135	-0.150745	-0.150794	-0.162321	-0.161632		86670	-0.00199438	-0.00205434	-0.00713258	-0.00241371	-0.00198267	-0.00208448	-0.0024117	-0.00237499	-0.00198735	-0.00197397		86670	-0.00198412	-0.00205412	0.00136822	-0.00241366	-0.00197256	-0.00208425	-0.00241165	-0.00237499	-0.00197732	-0.00196386
86671	-0.296793	-0.298665	-0.235528	-0.305264	-0.296543	-0.298561	-0.305294	-0.305348	-0.296876	-0.29616		86671	-0.162764	-0.16165	-0.219326	-0.151123	-0.162499	-0.161604	-0.151177	-0.151226	-0.162791	-0.162103		86671	-0.00199444	-0.00205435	-0.00717765	-0.00241371	-0.00198273	-0.00208448	-0.0024117	-0.00237499	-0.00198742	-0.00197403		86671	-0.00198412	-0.00205412	0.0013672	-0.00241366	-0.00197256	-0.00208425	-0.00241165	-0.00237499	-0.00197732	-0.00196387
86672	-0.297576	-0.299451	-0.236239	-0.306059	-0.297326	-0.299346	-0.306089	-0.306143	-0.297659	-0.296945		86672	-0.163232	-0.162118	-0.220073	-0.151554	-0.162968	-0.162072	-0.151608	-0.151657	-0.163259	-0.162573		86672	-0.00199451	-0.00205435	-0.00722271	-0.00241371	-0.0019828	-0.00208448	-0.0024117	-0.00237499	-0.00198748	-0.0019741		86672	-0.00198412	-0.00205412	0.00136619	-0.00241366	-0.00197256	-0.00208425	-0.00241165	-0.00237499	-0.00197732	-0.00196387
86673	-0.298357	-0.300235	-0.236949	-0.306853	-0.298108	-0.30013	-0.306883	-0.306937	-0.29844	-0.297727		86673	-0.163699	-0.162585	-0.220818	-0.151984	-0.163435	-0.162539	-0.152038	-0.152087	-0.163726	-0.163041		86673	-0.00199458	-0.00205435	-0.00726778	-0.00241372	-0.00198286	-0.00208448	-0.0024117	-0.00237499	-0.00198755	-0.00197417		86673	-0.00198412	-0.00205412	0.00136517	-0.00241366	-0.00197256	-0.00208425	-0.00241165	-0.00237499	-0.00197732	-0.00196387
86674	-0.299136	-0.301017	-0.237658	-0.307645	-0.298888	-0.300911	-0.307674	-0.307728	-0.299219	-0.298507		86674	-0.164165	-0.163051	-0.221561	-0.152414	-0.163902	-0.163005	-0.152467	-0.152516	-0.164192	-0.163508		86674	-0.00199464	-0.00205435	-0.00731283	-0.00241372	-0.00198293	-0.00208448	-0.0024117	-0.00237499	-0.00198761	-0.00197424		86674	-0.00198413	-0.00205412	0.00136415	-0.00241366	-0.00197256	-0.00208425	-0.00241165	-0.00237499	-0.00197732	-0.00196387
86675	-0.299913	-0.301797	-0.238365	-0.308434	-0.299665	-0.301691	-0.308464	-0.308517	-0.299996	-0.299286		86675	-0.16463	-0.163516	-0.222303	-0.152842	-0.164367	-0.163469	-0.152895	-0.152944	-0.164657	-0.163974		86675	-0.00199471	-0.00205435	-0.00735788	-0.00241372	-0.001983	-0.00208449	-0.0024117	-0.002375	-0.00198768	-0.0019743		86675	-0.00198413	-0.00205412	0.00136313	-0.00241366	-0.00197256	-0.00208425	-0.00241165	-0.00237499	-0.00197732	-0.00196387
86676	-0.300688	-0.302574	-0.23907	-0.309222	-0.300441	-0.302468	-0.309251	-0.309305	-0.300771	-0.300062		86676	-0.165093	-0.163979	-0.223043	-0.15327	-0.164831	-0.163932	-0.153323	-0.153372	-0.165121	-0.164439		86676	-0.00199478	-0.00205435	-0.00740292	-0.00241372	-0.00198306	-0.00208449	-0.0024117	-0.002375	-0.00198774	-0.00197437		86676	-0.00198413	-0.00205412	0.00136211	-0.00241366	-0.00197256	-0.00208425	-0.00241165	-0.00237499	-0.00197733	-0.00196387
86677	-0.301461	-0.30335	-0.239774	-0.310007	-0.301214	-0.303244	-0.310036	-0.31009	-0.301544	-0.300836		86677	-0.165555	-0.164441	-0.223782	-0.153696	-0.165294	-0.164395	-0.153749	-0.153798	-0.165583	-0.164903		86677	-0.00199484	-0.00205436	-0.00744796	-0.00241372	-0.00198313	-0.00208449	-0.0024117	-0.002375	-0.00198781	-0.00197444		86677	-0.00198413	-0.00205412	0.00136108	-0.00241366	-0.00197256	-0.00208425	-0.00241165	-0.00237499	-0.00197733	-0.00196387
86678	-0.302232	-0.304124	-0.240476	-0.310791	-0.301986	-0.304017	-0.31082	-0.310873	-0.302315	-0.301609		86678	-0.166017	-0.164903	-0.224519	-0.154122	-0.165756	-0.164856	-0.154174	-0.154224	-0.166044	-0.165366		86678	-0.00199491	-0.00205436	-0.00749299	-0.00241372	-0.0019832	-0.00208449	-0.0024117	-0.002375	-0.00198787	-0.00197451		86678	-0.00198413	-0.00205412	0.00136006	-0.00241366	-0.00197256	-0.00208425	-0.00241165	-0.00237499	-0.00197733	-0.00196387
86679	-0.303001	-0.304896	-0.241177	-0.311572	-0.302756	-0.304789	-0.311601	-0.311655	-0.303085	-0.302379		86679	-0.166476	-0.165363	-0.225254	-0.154546	-0.166217	-0.165315	-0.154599	-0.154648	-0.166504	-0.165827		86679	-0.00199498	-0.00205436	-0.00753801	-0.00241372	-0.00198326	-0.00208449	-0.0024117	-0.002375	-0.00198794	-0.00197457		86679	-0.00198413	-0.00205412	0.00135904	-0.00241366	-0.00197257	-0.00208425	-0.00241165	-0.00237499	-0.00197733	-0.00196387
86680	-0.303768	-0.305666	-0.241876	-0.312352	-0.303523	-0.305559	-0.31238	-0.312434	-0.303852	-0.303147		86680	-0.166935	-0.165822	-0.225987	-0.15497	-0.166676	-0.165774	-0.155023	-0.155072	-0.166963	-0.166287		86680	-0.00199504	-0.00205436	-0.00758302	-0.00241372	-0.00198333	-0.00208449	-0.00241171	-0.002375	-0.00198801	-0.00197464		86680	-0.00198413	-0.00205412	0.00135802	-0.00241366	-0.00197257	-0.00208425	-0.00241165	-0.00237499	-0.00197733	-0.00196388
86681	-0.304534	-0.306434	-0.242574	-0.313129	-0.304289	-0.306326	-0.313158	-0.313212	-0.304617	-0.303914		86681	-0.167393	-0.166279	-0.226719	-0.155393	-0.167134	-0.166232	-0.155445	-0.155495	-0.167421	-0.166746		86681	-0.00199511	-0.00205436	-0.00762803	-0.00241372	-0.0019834	-0.0020845	-0.00241171	-0.002375	-0.00198807	-0.00197471		86681	-0.00198413	-0.00205412	0.001357	-0.00241366	-0.00197257	-0.00208425	-0.00241165	-0.00237499	-0.00197733	-0.00196388
86682	-0.305297	-0.3072	-0.243271	-0.313905	-0.305053	-0.307092	-0.313933	-0.313987	-0.305381	-0.304679		86682	-0.167849	-0.166736	-0.22745	-0.155815	-0.167591	-0.166688	-0.155867	-0.155916	-0.167877	-0.167204		86682	-0.00199518	-0.00205436	-0.00767302	-0.00241372	-0.00198346	-0.0020845	-0.00241171	-0.002375	-0.00198814	-0.00197478		86682	-0.00198413	-0.00205412	0.00135597	-0.00241366	-0.00197257	-0.00208425	-0.00241165	-0.00237499	-0.00197733	-0.00196388
86683	-0.306058	-0.307964	-0.243966	-0.314679	-0.305815	-0.307856	-0.314707	-0.31476	-0.306142	-0.305441		86683	-0.168304	-0.167191	-0.228178	-0.156236	-0.168047	-0.167143	-0.156288	-0.156337	-0.168333	-0.167661		86683	-0.00199525	-0.00205437	-0.00771801	-0.00241372	-0.00198353	-0.0020845	-0.00241171	-0.002375	-0.0019882	-0.00197484		86683	-0.00198414	-0.00205412	0.00135495	-0.00241366	-0.00197257	-0.00208425	-0.00241165	-0.00237499	-0.00197733	-0.00196388
86684	-0.306818	-0.308726	-0.244659	-0.31545	-0.306575	-0.308618	-0.315478	-0.315532	-0.306902	-0.306202		86684	-0.168758	-0.167646	-0.228906	-0.156656	-0.168502	-0.167598	-0.156708	-0.156757	-0.168787	-0.168116		86684	-0.00199531	-0.00205437	-0.00776299	-0.00241372	-0.0019836	-0.0020845	-0.00241171	-0.002375	-0.00198827	-0.00197491		86684	-0.00198414	-0.00205412	0.00135392	-0.00241366	-0.00197257	-0.00208425	-0.00241165	-0.00237499	-0.00197733	-0.00196388
86685	-0.307575	-0.309486	-0.245351	-0.31622	-0.307333	-0.309378	-0.316248	-0.316301	-0.307659	-0.306961		86685	-0.169211	-0.168099	-0.229631	-0.157075	-0.168956	-0.168051	-0.157127	-0.157176	-0.16924	-0.168571		86685	-0.00199538	-0.00205437	-0.00780796	-0.00241372	-0.00198366	-0.0020845	-0.00241171	-0.002375	-0.00198833	-0.00197498		86685	-0.00198414	-0.00205412	0.0013529	-0.00241366	-0.00197257	-0.00208425	-0.00241165	-0.00237499	-0.00197734	-0.00196388
86686	-0.308331	-0.310245	-0.246042	-0.316988	-0.308089	-0.310136	-0.317015	-0.317069	-0.308415	-0.307718		86686	-0.169663	-0.168551	-0.230355	-0.157493	-0.169408	-0.168502	-0.157545	-0.157595	-0.169692	-0.169024		86686	-0.00199545	-0.00205437	-0.00785292	-0.00241372	-0.00198373	-0.00208451	-0.00241171	-0.002375	-0.0019884	-0.00197505		86686	-0.00198414	-0.00205412	0.00135188	-0.00241366	-0.00197257	-0.00208425	-0.00241165	-0.00237499	-0.00197734	-0.00196388
86687	-0.309085	-0.311001	-0.246731	-0.317754	-0.308844	-0.310892	-0.317781	-0.317835	-0.309169	-0.308473		86687	-0.170114	-0.169002	-0.231077	-0.157911	-0.16986	-0.168953	-0.157962	-0.158012	-0.170143	-0.169476		86687	-0.00199551	-0.00205437	-0.00789787	-0.00241372	-0.0019838	-0.00208451	-0.00241171	-0.002375	-0.00198847	-0.00197512		86687	-0.00198414	-0.00205412	0.00135085	-0.00241366	-0.00197257	-0.00208425	-0.00241165	-0.00237499	-0.00197734	-0.00196388
86688	-0.309836	-0.311756	-0.247418	-0.318518	-0.309596	-0.311646	-0.318545	-0.318598	-0.309921	-0.309226		86688	-0.170563	-0.169452	-0.231798	-0.158327	-0.17031	-0.169403	-0.158379	-0.158428	-0.170592	-0.169927		86688	-0.00199558	-0.00205438	-0.00794281	-0.00241372	-0.00198387	-0.00208451	-0.00241171	-0.002375	-0.00198853	-0.00197518		86688	-0.00198414	-0.00205412	0.00134983	-0.00241366	-0.00197258	-0.00208425	-0.00241165	-0.00237499	-0.00197734	-0.00196388
86689	-0.310586	-0.312509	-0.248104	-0.31928	-0.310347	-0.312399	-0.319307	-0.31936	-0.310671	-0.309977		86689	-0.171012	-0.1699	-0.232517	-0.158743	-0.170759	-0.169851	-0.158794	-0.158844	-0.171041	-0.170377		86689	-0.00199565	-0.00205438	-0.00798774	-0.00241372	-0.00198393	-0.00208451	-0.00241171	-0.002375	-0.0019886	-0.00197525		86689	-0.00198414	-0.00205412	0.0013488	-0.00241366	-0.00197258	-0.00208425	-0.00241165	-0.00237499	-0.00197734	-0.00196389
86690	-0.311335	-0.313259	-0.248789	-0.32004	-0.311096	-0.313149	-0.320067	-0.32012	-0.31142	-0.310727		86690	-0.171459	-0.170348	-0.233235	-0.159157	-0.171207	-0.170299	-0.159209	-0.159258	-0.171488	-0.170825		86690	-0.00199572	-0.00205438	-0.00803265	-0.00241372	-0.001984	-0.00208451	-0.00241171	-0.002375	-0.00198866	-0.00197532		86690	-0.00198414	-0.00205412	0.00134777	-0.00241366	-0.00197258	-0.00208425	-0.00241165	-0.00237499	-0.00197734	-0.00196389
86691	-0.312081	-0.314008	-0.249472	-0.320798	-0.311842	-0.313898	-0.320825	-0.320878	-0.312166	-0.311474		86691	-0.171905	-0.170794	-0.233951	-0.159571	-0.171653	-0.170745	-0.159623	-0.159672	-0.171935	-0.171273		86691	-0.00199578	-0.00205438	-0.00807756	-0.00241372	-0.00198407	-0.00208451	-0.00241171	-0.002375	-0.00198873	-0.00197539		86691	-0.00198414	-0.00205412	0.00134675	-0.00241366	-0.00197258	-0.00208425	-0.00241165	-0.00237499	-0.00197734	-0.00196389
86692	-0.312825	-0.314755	-0.250154	-0.321554	-0.312587	-0.314645	-0.321581	-0.321634	-0.31291	-0.31222		86692	-0.17235	-0.17124	-0.234666	-0.159984	-0.172099	-0.17119	-0.160035	-0.160085	-0.17238	-0.171719		86692	-0.00199585	-0.00205438	-0.00812245	-0.00241372	-0.00198414	-0.00208452	-0.00241171	-0.002375	-0.0019888	-0.00197546		86692	-0.00198415	-0.00205412	0.00134572	-0.00241366	-0.00197258	-0.00208425	-0.00241165	-0.00237499	-0.00197734	-0.00196389
86693	-0.313568	-0.315501	-0.250835	-0.322309	-0.313331	-0.31539	-0.322335	-0.322389	-0.313653	-0.312964		86693	-0.172794	-0.171684	-0.235379	-0.160396	-0.172544	-0.171634	-0.160447	-0.160497	-0.172824	-0.172165		86693	-0.00199592	-0.00205438	-0.00816734	-0.00241372	-0.0019842	-0.00208452	-0.00241171	-0.002375	-0.00198886	-0.00197552		86693	-0.00198415	-0.00205412	0.00134469	-0.00241366	-0.00197258	-0.00208425	-0.00241165	-0.00237499	-0.00197734	-0.00196389
86694	-0.314309	-0.316244	-0.251514	-0.323061	-0.314072	-0.316133	-0.323088	-0.323141	-0.314394	-0.313706		86694	-0.173236	-0.172127	-0.23609	-0.160807	-0.172987	-0.172077	-0.160858	-0.160908	-0.173267	-0.172609		86694	-0.00199599	-0.00205439	-0.00821221	-0.00241372	-0.00198427	-0.00208452	-0.00241171	-0.002375	-0.00198893	-0.00197559		86694	-0.00198415	-0.00205412	0.00134366	-0.00241366	-0.00197258	-0.00208425	-0.00241165	-0.00237499	-0.00197735	-0.00196389
86695	-0.315048	-0.316986	-0.252191	-0.323812	-0.314811	-0.316874	-0.323838	-0.323892	-0.315133	-0.314446		86695	-0.173678	-0.172569	-0.2368	-0.161218	-0.173429	-0.172519	-0.161268	-0.161318	-0.173708	-0.173052		86695	-0.00199606	-0.00205439	-0.00825707	-0.00241372	-0.00198434	-0.00208452	-0.00241171	-0.002375	-0.001989	-0.00197566		86695	-0.00198415	-0.00205412	0.00134264	-0.00241366	-0.00197258	-0.00208425	-0.00241165	-0.00237499	-0.00197735	-0.00196389
86696	-0.315785	-0.317725	-0.252868	-0.324561	-0.315549	-0.317613	-0.324587	-0.32464	-0.31587	-0.315184		86696	-0.174118	-0.17301	-0.237508	-0.161627	-0.173871	-0.17296	-0.161678	-0.161727	-0.174149	-0.173494		86696	-0.00199612	-0.00205439	-0.00830191	-0.00241372	-0.00198441	-0.00208452	-0.00241171	-0.002375	-0.00198906	-0.00197573		86696	-0.00198415	-0.00205412	0.00134161	-0.00241366	-0.00197258	-0.00208425	-0.00241165	-0.00237499	-0.00197735	-0.00196389
86697	-0.31652	-0.318463	-0.253542	-0.325308	-0.316285	-0.318351	-0.325334	-0.325387	-0.316606	-0.31592		86697	-0.174558	-0.17345	-0.238215	-0.162035	-0.174311	-0.173399	-0.162086	-0.162136	-0.174589	-0.173934		86697	-0.00199619	-0.00205439	-0.00834675	-0.00241372	-0.00198447	-0.00208452	-0.00241171	-0.002375	-0.00198913	-0.0019758		86697	-0.00198415	-0.00205412	0.00134058	-0.00241366	-0.00197259	-0.00208425	-0.00241165	-0.00237499	-0.00197735	-0.0019639
86698	-0.317253	-0.319199	-0.254216	-0.326053	-0.317019	-0.319087	-0.326079	-0.326132	-0.317339	-0.316655		86698	-0.174996	-0.173888	-0.238921	-0.162443	-0.17475	-0.173838	-0.162494	-0.162543	-0.175027	-0.174374		86698	-0.00199626	-0.00205439	-0.00839157	-0.00241372	-0.00198454	-0.00208453	-0.00241171	-0.002375	-0.00198919	-0.00197587		86698	-0.00198415	-0.00205412	0.00133955	-0.00241366	-0.00197259	-0.00208425	-0.00241165	-0.00237499	-0.00197735	-0.0019639
86699	-0.317985	-0.319934	-0.254888	-0.326796	-0.317751	-0.319821	-0.326822	-0.326875	-0.318071	-0.317388		86699	-0.175433	-0.174326	-0.239624	-0.16285	-0.175187	-0.174275	-0.1629	-0.16295	-0.175464	-0.174813		86699	-0.00199633	-0.00205439	-0.00843637	-0.00241372	-0.00198461	-0.00208453	-0.00241171	-0.002375	-0.00198926	-0.00197594		86699	-0.00198415	-0.00205412	0.00133852	-0.00241366	-0.00197259	-0.00208425	-0.00241165	-0.00237499	-0.00197735	-0.0019639
86700	-0.318715	-0.320666	-0.255558	-0.327537	-0.318482	-0.320553	-0.327563	-0.327616	-0.318801	-0.318119		86700	-0.175869	-0.174763	-0.240327	-0.163256	-0.175624	-0.174712	-0.163306	-0.163356	-0.175901	-0.17525		86700	-0.0019964	-0.0020544	-0.00848117	-0.00241372	-0.00198468	-0.00208453	-0.00241171	-0.002375	-0.00198933	-0.00197601		86700	-0.00198415	-0.00205412	0.00133749	-0.00241366	-0.00197259	-0.00208425	-0.00241165	-0.00237499	-0.00197735	-0.0019639
86701	-0.319443	-0.321397	-0.256228	-0.328277	-0.31921	-0.321283	-0.328302	-0.328356	-0.319529	-0.318848		86701	-0.176304	-0.175198	-0.241028	-0.163661	-0.17606	-0.175147	-0.163711	-0.163761	-0.176336	-0.175687		86701	-0.00199646	-0.0020544	-0.00852595	-0.00241372	-0.00198475	-0.00208453	-0.00241171	-0.002375	-0.00198939	-0.00197607		86701	-0.00198416	-0.00205412	0.00133646	-0.00241366	-0.00197259	-0.00208425	-0.00241165	-0.00237499	-0.00197735	-0.0019639
86702	-0.320169	-0.322126	-0.256896	-0.329015	-0.319937	-0.322012	-0.32904	-0.329093	-0.320256	-0.319576		86702	-0.176738	-0.175632	-0.241727	-0.164065	-0.176494	-0.175581	-0.164115	-0.164165	-0.17677	-0.176122		86702	-0.00199653	-0.0020544	-0.00857071	-0.00241373	-0.00198481	-0.00208453	-0.00241171	-0.00237501	-0.00198946	-0.00197614		86702	-0.00198416	-0.00205412	0.00133543	-0.00241366	-0.00197259	-0.00208425	-0.00241165	-0.00237499	-0.00197735	-0.0019639
86703	-0.320894	-0.322853	-0.257562	-0.329751	-0.320662	-0.322739	-0.329776	-0.329829	-0.32098	-0.320302		86703	-0.177171	-0.176066	-0.242425	-0.164468	-0.176928	-0.176014	-0.164518	-0.164568	-0.177203	-0.176556		86703	-0.0019966	-0.0020544	-0.00861546	-0.00241373	-0.00198488	-0.00208454	-0.00241171	-0.00237501	-0.00198953	-0.00197621		86703	-0.00198416	-0.00205412	0.0013344	-0.00241366	-0.00197259	-0.00208425	-0.00241165	-0.00237499	-0.00197736	-0.0019639
86704	-0.321617	-0.323578	-0.258227	-0.330485	-0.321386	-0.323464	-0.33051	-0.330563	-0.321703	-0.321026		86704	-0.177603	-0.176498	-0.243121	-0.164871	-0.17736	-0.176446	-0.16492	-0.16497	-0.177635	-0.176989		86704	-0.00199667	-0.0020544	-0.0086602	-0.00241373	-0.00198495	-0.00208454	-0.00241171	-0.00237501	-0.0019896	-0.00197628		86704	-0.00198416	-0.00205412	0.00133337	-0.00241366	-0.00197259	-0.00208425	-0.00241165	-0.00237499	-0.00197736	-0.0019639
86705	-0.322338	-0.324302	-0.258891	-0.331217	-0.322107	-0.324187	-0.331242	-0.331295	-0.322424	-0.321748		86705	-0.178033	-0.176929	-0.243816	-0.165272	-0.177792	-0.176877	-0.165322	-0.165372	-0.178065	-0.177421		86705	-0.00199674	-0.00205441	-0.00870492	-0.00241373	-0.00198502	-0.00208454	-0.00241171	-0.00237501	-0.00198966	-0.00197635		86705	-0.00198416	-0.00205412	0.00133234	-0.00241366	-0.00197259	-0.00208425	-0.00241165	-0.00237499	-0.00197736	-0.0019639
86706	-0.323057	-0.325023	-0.259553	-0.331948	-0.322827	-0.324909	-0.331973	-0.332026	-0.323144	-0.322468		86706	-0.178463	-0.177359	-0.244509	-0.165673	-0.178222	-0.177307	-0.165723	-0.165772	-0.178495	-0.177852		86706	-0.0019968	-0.00205441	-0.00874963	-0.00241373	-0.00198509	-0.00208454	-0.00241171	-0.00237501	-0.00198973	-0.00197642		86706	-0.00198416	-0.00205412	0.00133131	-0.00241366	-0.0019726	-0.00208425	-0.00241165	-0.00237499	-0.00197736	-0.00196391
86707	-0.323774	-0.325744	-0.260214	-0.332677	-0.323545	-0.325628	-0.332701	-0.332754	-0.323861	-0.323187		86707	-0.178891	-0.177788	-0.245201	-0.166073	-0.178651	-0.177736	-0.166122	-0.166172	-0.178924	-0.178282		86707	-0.00199687	-0.00205441	-0.00879432	-0.00241373	-0.00198515	-0.00208454	-0.00241172	-0.00237501	-0.0019898	-0.00197649		86707	-0.00198416	-0.00205412	0.00133028	-0.00241366	-0.0019726	-0.00208425	-0.00241165	-0.00237499	-0.00197736	-0.00196391
86708	-0.32449	-0.326462	-0.260874	-0.333404	-0.324261	-0.326347	-0.333428	-0.333481	-0.324577	-0.323904		86708	-0.179319	-0.178216	-0.245892	-0.166472	-0.179079	-0.178164	-0.166521	-0.166571	-0.179351	-0.178711		86708	-0.00199694	-0.00205441	-0.008839	-0.00241373	-0.00198522	-0.00208454	-0.00241172	-0.00237501	-0.00198986	-0.00197656		86708	-0.00198416	-0.00205412	0.00132925	-0.00241366	-0.0019726	-0.00208425	-0.00241165	-0.00237499	-0.00197736	-0.00196391
86709	-0.325204	-0.327178	-0.261532	-0.334129	-0.324976	-0.327063	-0.334153	-0.334206	-0.325292	-0.324619		86709	-0.179745	-0.178643	-0.246581	-0.16687	-0.179506	-0.178591	-0.166919	-0.166969	-0.179778	-0.179139		86709	-0.00199701	-0.00205441	-0.00888366	-0.00241373	-0.00198529	-0.00208455	-0.00241172	-0.00237501	-0.00198993	-0.00197663		86709	-0.00198417	-0.00205412	0.00132822	-0.00241366	-0.0019726	-0.00208425	-0.00241165	-0.00237499	-0.00197736	-0.00196391
86710	-0.325917	-0.327893	-0.26219	-0.334853	-0.325689	-0.327777	-0.334877	-0.33493	-0.326004	-0.325333		86710	-0.18017	-0.179069	-0.247268	-0.167267	-0.179932	-0.179016	-0.167316	-0.167366	-0.180203	-0.179565		86710	-0.00199708	-0.00205441	-0.00892831	-0.00241373	-0.00198536	-0.00208455	-0.00241172	-0.00237501	-0.00199	-0.0019767		86710	-0.00198417	-0.00205412	0.00132719	-0.00241366	-0.0019726	-0.00208425	-0.00241165	-0.00237499	-0.00197736	-0.00196391
86711	-0.326627	-0.328606	-0.262845	-0.335574	-0.3264	-0.32849	-0.335598	-0.335651	-0.326715	-0.326044		86711	-0.180595	-0.179494	-0.247955	-0.167664	-0.180357	-0.179441	-0.167713	-0.167763	-0.180628	-0.179991		86711	-0.00199715	-0.00205442	-0.00897294	-0.00241373	-0.00198543	-0.00208455	-0.00241172	-0.00237501	-0.00199006	-0.00197677		86711	-0.00198417	-0.00205412	0.00132615	-0.00241366	-0.0019726	-0.00208425	-0.00241165	-0.00237499	-0.00197737	-0.00196391
86712	-0.327336	-0.329318	-0.2635	-0.336294	-0.327109	-0.329201	-0.336318	-0.336371	-0.327424	-0.326754		86712	-0.181018	-0.179918	-0.248639	-0.168059	-0.180781	-0.179865	-0.168108	-0.168158	-0.181051	-0.180415		86712	-0.00199722	-0.00205442	-0.00901755	-0.00241373	-0.0019855	-0.00208455	-0.00241172	-0.00237501	-0.00199013	-0.00197684		86712	-0.00198417	-0.00205412	0.00132512	-0.00241366	-0.0019726	-0.00208425	-0.00241165	-0.00237499	-0.00197737	-0.00196391
86713	-0.328043	-0.330027	-0.264153	-0.337013	-0.327817	-0.329911	-0.337036	-0.337089	-0.328131	-0.327463		86713	-0.18144	-0.18034	-0.249322	-0.168454	-0.181203	-0.180287	-0.168503	-0.168553	-0.181473	-0.180839		86713	-0.00199728	-0.00205442	-0.00906215	-0.00241373	-0.00198557	-0.00208455	-0.00241172	-0.00237501	-0.0019902	-0.00197691		86713	-0.00198417	-0.00205412	0.00132409	-0.00241366	-0.0019726	-0.00208425	-0.00241165	-0.00237499	-0.00197737	-0.00196391
86714	-0.328749	-0.330735	-0.264804	-0.337729	-0.328523	-0.330618	-0.337753	-0.337806	-0.328837	-0.328169		86714	-0.181861	-0.180762	-0.250004	-0.168848	-0.181625	-0.180709	-0.168897	-0.168947	-0.181894	-0.181261		86714	-0.00199735	-0.00205442	-0.00910673	-0.00241373	-0.00198563	-0.00208456	-0.00241172	-0.00237501	-0.00199027	-0.00197697		86714	-0.00198417	-0.00205412	0.00132306	-0.00241366	-0.00197261	-0.00208425	-0.00241165	-0.00237499	-0.00197737	-0.00196392
86715	-0.329452	-0.331442	-0.265455	-0.338444	-0.329227	-0.331324	-0.338467	-0.33852	-0.32954	-0.328874		86715	-0.182281	-0.181183	-0.250685	-0.169241	-0.182046	-0.181129	-0.16929	-0.16934	-0.182314	-0.181682		86715	-0.00199742	-0.00205442	-0.00915129	-0.00241373	-0.0019857	-0.00208456	-0.00241172	-0.00237501	-0.00199033	-0.00197704		86715	-0.00198417	-0.00205412	0.00132202	-0.00241366	-0.00197261	-0.00208425	-0.00241165	-0.00237499	-0.00197737	-0.00196392
86716	-0.330155	-0.332146	-0.266104	-0.339157	-0.32993	-0.332029	-0.33918	-0.339233	-0.330243	-0.329577		86716	-0.1827	-0.181602	-0.251364	-0.169634	-0.182465	-0.181549	-0.169682	-0.169732	-0.182734	-0.182103		86716	-0.00199749	-0.00205443	-0.00919584	-0.00241373	-0.00198577	-0.00208456	-0.00241172	-0.00237501	-0.0019904	-0.00197711		86716	-0.00198417	-0.00205412	0.00132099	-0.00241366	-0.00197261	-0.00208425	-0.00241165	-0.00237499	-0.00197737	-0.00196392
86717	-0.330855	-0.332849	-0.266752	-0.339868	-0.330631	-0.332731	-0.339891	-0.339944	-0.330943	-0.330279		86717	-0.183118	-0.182021	-0.252041	-0.170025	-0.182884	-0.181967	-0.170074	-0.170123	-0.183152	-0.182522		86717	-0.00199756	-0.00205443	-0.00924037	-0.00241373	-0.00198584	-0.00208456	-0.00241172	-0.00237501	-0.00199047	-0.00197718		86717	-0.00198417	-0.00205412	0.00131996	-0.00241366	-0.00197261	-0.00208425	-0.00241165	-0.00237499	-0.00197737	-0.00196392
86718	-0.331554	-0.33355	-0.267398	-0.340578	-0.33133	-0.333432	-0.340601	-0.340654	-0.331642	-0.330979		86718	-0.183535	-0.182438	-0.252717	-0.170416	-0.183301	-0.182384	-0.170464	-0.170514	-0.183569	-0.18294		86718	-0.00199763	-0.00205443	-0.00928488	-0.00241373	-0.00198591	-0.00208456	-0.00241172	-0.00237501	-0.00199054	-0.00197725		86718	-0.00198418	-0.00205412	0.00131892	-0.00241366	-0.00197261	-0.00208425	-0.00241165	-0.00237499	-0.00197737	-0.00196392
86719	-0.332251	-0.33425	-0.268043	-0.341286	-0.332028	-0.334132	-0.341309	-0.341362	-0.332339	-0.331677		86719	-0.18395	-0.182855	-0.253392	-0.170806	-0.183718	-0.182801	-0.170854	-0.170904	-0.183985	-0.183357		86719	-0.0019977	-0.00205443	-0.00932937	-0.00241373	-0.00198598	-0.00208457	-0.00241172	-0.00237501	-0.0019906	-0.00197732		86719	-0.00198418	-0.00205412	0.00131789	-0.00241366	-0.00197261	-0.00208425	-0.00241165	-0.00237499	-0.00197737	-0.00196392
86720	-0.332946	-0.334948	-0.268687	-0.341992	-0.332724	-0.334829	-0.342015	-0.342068	-0.333035	-0.332374		86720	-0.184365	-0.18327	-0.254065	-0.171195	-0.184133	-0.183216	-0.171243	-0.171293	-0.1844	-0.183774		86720	-0.00199777	-0.00205443	-0.00937385	-0.00241373	-0.00198605	-0.00208457	-0.00241172	-0.00237501	-0.00199067	-0.00197739		86720	-0.00198418	-0.00205412	0.00131685	-0.00241366	-0.00197261	-0.00208425	-0.00241165	-0.00237499	-0.00197738	-0.00196392
86721	-0.33364	-0.335644	-0.26933	-0.342697	-0.333418	-0.335525	-0.342719	-0.342772	-0.333729	-0.333069		86721	-0.184779	-0.183685	-0.254737	-0.171583	-0.184548	-0.18363	-0.171631	-0.171681	-0.184813	-0.184189		86721	-0.00199784	-0.00205444	-0.00941831	-0.00241373	-0.00198612	-0.00208457	-0.00241172	-0.00237501	-0.00199074	-0.00197746		86721	-0.00198418	-0.00205412	0.00131582	-0.00241366	-0.00197261	-0.00208425	-0.00241165	-0.00237499	-0.00197738	-0.00196392
86722	-0.334332	-0.336338	-0.269971	-0.3434	-0.334111	-0.336219	-0.343422	-0.343475	-0.334421	-0.333762		86722	-0.185192	-0.184098	-0.255408	-0.17197	-0.184961	-0.184044	-0.172018	-0.172068	-0.185226	-0.184603		86722	-0.0019979	-0.00205444	-0.00946275	-0.00241373	-0.00198618	-0.00208457	-0.00241172	-0.00237501	-0.00199081	-0.00197753		86722	-0.00198418	-0.00205412	0.00131479	-0.00241366	-0.00197261	-0.00208425	-0.00241165	-0.00237499	-0.00197738	-0.00196393
86723	-0.335023	-0.337031	-0.270611	-0.344101	-0.334802	-0.336912	-0.344123	-0.344176	-0.335112	-0.334453		86723	-0.185603	-0.184511	-0.256077	-0.172357	-0.185374	-0.184456	-0.172404	-0.172454	-0.185638	-0.185016		86723	-0.00199797	-0.00205444	-0.00950718	-0.00241373	-0.00198625	-0.00208457	-0.00241172	-0.00237501	-0.00199087	-0.0019776		86723	-0.00198418	-0.00205412	0.00131375	-0.00241366	-0.00197262	-0.00208425	-0.00241165	-0.00237499	-0.00197738	-0.00196393
86724	-0.335711	-0.337722	-0.27125	-0.3448	-0.335491	-0.337603	-0.344822	-0.344875	-0.335801	-0.335143		86724	-0.186014	-0.184922	-0.256745	-0.172742	-0.185785	-0.184867	-0.17279	-0.17284	-0.186049	-0.185428		86724	-0.00199804	-0.00205444	-0.00955158	-0.00241373	-0.00198632	-0.00208457	-0.00241172	-0.00237501	-0.00199094	-0.00197767		86724	-0.00198418	-0.00205412	0.00131272	-0.00241366	-0.00197262	-0.00208425	-0.00241165	-0.00237499	-0.00197738	-0.00196393
86725	-0.336399	-0.338412	-0.271887	-0.345498	-0.336179	-0.338292	-0.34552	-0.345573	-0.336488	-0.335832		86725	-0.186424	-0.185333	-0.257411	-0.173127	-0.186195	-0.185278	-0.173175	-0.173225	-0.186459	-0.185839		86725	-0.00199811	-0.00205444	-0.00959597	-0.00241373	-0.00198639	-0.00208458	-0.00241172	-0.00237501	-0.00199101	-0.00197774		86725	-0.00198418	-0.00205412	0.00131168	-0.00241366	-0.00197262	-0.00208425	-0.00241165	-0.00237499	-0.00197738	-0.00196393
86726	-0.337084	-0.3391	-0.272524	-0.346194	-0.336865	-0.33898	-0.346216	-0.346269	-0.337174	-0.336518		86726	-0.186832	-0.185742	-0.258076	-0.173511	-0.186605	-0.185687	-0.173559	-0.173609	-0.186868	-0.186249		86726	-0.00199818	-0.00205444	-0.00964034	-0.00241373	-0.00198646	-0.00208458	-0.00241172	-0.00237501	-0.00199108	-0.00197781		86726	-0.00198419	-0.00205412	0.00131065	-0.00241366	-0.00197262	-0.00208425	-0.00241165	-0.00237499	-0.00197738	-0.00196393
86727	-0.337768	-0.339786	-0.273159	-0.346889	-0.337549	-0.339666	-0.346911	-0.346964	-0.337858	-0.337203		86727	-0.18724	-0.18615	-0.25874	-0.173895	-0.187013	-0.186095	-0.173942	-0.173992	-0.187275	-0.186658		86727	-0.00199825	-0.00205445	-0.00968469	-0.00241373	-0.00198653	-0.00208458	-0.00241172	-0.00237501	-0.00199114	-0.00197788		86727	-0.00198419	-0.00205412	0.00130961	-0.00241366	-0.00197262	-0.00208425	-0.00241165	-0.00237498	-0.00197738	-0.00196393
86728	-0.338451	-0.340471	-0.273792	-0.347582	-0.338232	-0.340351	-0.347603	-0.347656	-0.33854	-0.337887		86728	-0.187647	-0.186558	-0.259402	-0.174277	-0.18742	-0.186503	-0.174325	-0.174375	-0.187682	-0.187066		86728	-0.00199832	-0.00205445	-0.00972902	-0.00241373	-0.0019866	-0.00208458	-0.00241172	-0.00237502	-0.00199121	-0.00197795		86728	-0.00198419	-0.00205412	0.00130858	-0.00241366	-0.00197262	-0.00208425	-0.00241165	-0.00237498	-0.00197739	-0.00196393
86729	-0.339131	-0.341154	-0.274425	-0.348273	-0.338913	-0.341034	-0.348295	-0.348347	-0.339221	-0.338569		86729	-0.188052	-0.186964	-0.260063	-0.174659	-0.187826	-0.186909	-0.174706	-0.174756	-0.188088	-0.187473		86729	-0.00199839	-0.00205445	-0.00977333	-0.00241373	-0.00198667	-0.00208458	-0.00241172	-0.00237502	-0.00199128	-0.00197802		86729	-0.00198419	-0.00205412	0.00130754	-0.00241366	-0.00197262	-0.00208425	-0.00241165	-0.00237498	-0.00197739	-0.00196393
86730	-0.339811	-0.341836	-0.275056	-0.348963	-0.339593	-0.341715	-0.348984	-0.349037	-0.3399	-0.339249		86730	-0.188457	-0.18737	-0.260723	-0.17504	-0.188232	-0.187314	-0.175087	-0.175137	-0.188493	-0.187879		86730	-0.00199846	-0.00205445	-0.00981762	-0.00241374	-0.00198674	-0.00208459	-0.00241172	-0.00237502	-0.00199135	-0.00197809		86730	-0.00198419	-0.00205412	0.00130651	-0.00241366	-0.00197262	-0.00208425	-0.00241165	-0.00237498	-0.00197739	-0.00196393
86731	-0.340488	-0.342516	-0.275686	-0.349651	-0.340271	-0.342395	-0.349672	-0.349725	-0.340578	-0.339928		86731	-0.188861	-0.187774	-0.261381	-0.17542	-0.188636	-0.187719	-0.175467	-0.175517	-0.188897	-0.188284		86731	-0.00199853	-0.00205445	-0.00986189	-0.00241374	-0.00198681	-0.00208459	-0.00241172	-0.00237502	-0.00199142	-0.00197816		86731	-0.00198419	-0.00205412	0.00130547	-0.00241366	-0.00197263	-0.00208425	-0.00241165	-0.00237498	-0.00197739	-0.00196394
86732	-0.341164	-0.343194	-0.276315	-0.350337	-0.340948	-0.343073	-0.350358	-0.350411	-0.341254	-0.340605		86732	-0.189263	-0.188178	-0.262038	-0.175799	-0.189039	-0.188122	-0.175846	-0.175896	-0.189299	-0.188688		86732	-0.0019986	-0.00205446	-0.00990614	-0.00241374	-0.00198687	-0.00208459	-0.00241172	-0.00237502	-0.00199148	-0.00197823		86732	-0.00198419	-0.00205412	0.00130443	-0.00241366	-0.00197263	-0.00208425	-0.00241165	-0.00237498	-0.00197739	-0.00196394
86733	-0.341839	-0.343871	-0.276942	-0.351022	-0.341623	-0.343749	-0.351043	-0.351096	-0.341929	-0.34128		86733	-0.189665	-0.18858	-0.262694	-0.176178	-0.189442	-0.188524	-0.176225	-0.176275	-0.189701	-0.18909		86733	-0.00199867	-0.00205446	-0.00995038	-0.00241374	-0.00198694	-0.00208459	-0.00241173	-0.00237502	-0.00199155	-0.0019783		86733	-0.00198419	-0.00205412	0.0013034	-0.00241366	-0.00197263	-0.00208425	-0.00241165	-0.00237498	-0.00197739	-0.00196394
86734	-0.342511	-0.344546	-0.277568	-0.351705	-0.342296	-0.344424	-0.351726	-0.351779	-0.342602	-0.341954		86734	-0.190066	-0.188982	-0.263348	-0.176555	-0.189843	-0.188926	-0.176602	-0.176652	-0.190102	-0.189492		86734	-0.00199874	-0.00205446	-0.00999459	-0.00241374	-0.00198701	-0.00208459	-0.00241173	-0.00237502	-0.00199162	-0.00197837		86734	-0.0019842	-0.00205412	0.00130236	-0.00241366	-0.00197263	-0.00208425	-0.00241165	-0.00237498	-0.00197739	-0.00196394
86735	-0.343183	-0.34522	-0.278194	-0.352387	-0.342968	-0.345097	-0.352408	-0.35246	-0.343273	-0.342626		86735	-0.190465	-0.189382	-0.264001	-0.176932	-0.190243	-0.189326	-0.176979	-0.177029	-0.190502	-0.189893		86735	-0.0019988	-0.00205446	-0.0100388	-0.00241374	-0.00198708	-0.0020846	-0.00241173	-0.00237502	-0.00199169	-0.00197844		86735	-0.0019842	-0.00205412	0.00130133	-0.00241366	-0.00197263	-0.00208425	-0.00241165	-0.00237498	-0.00197739	-0.00196394
86736	-0.343852	-0.345892	-0.278817	-0.353067	-0.343638	-0.345769	-0.353088	-0.35314	-0.343943	-0.343297		86736	-0.190864	-0.189782	-0.264653	-0.177309	-0.190642	-0.189726	-0.177355	-0.177405	-0.190901	-0.190293		86736	-0.00199887	-0.00205446	-0.010083	-0.00241374	-0.00198715	-0.0020846	-0.00241173	-0.00237502	-0.00199175	-0.00197851		86736	-0.0019842	-0.00205412	0.00130029	-0.00241366	-0.00197263	-0.00208425	-0.00241165	-0.00237498	-0.00197739	-0.00196394
86737	-0.344521	-0.346562	-0.27944	-0.353745	-0.344306	-0.346439	-0.353766	-0.353818	-0.344611	-0.343966		86737	-0.191262	-0.19018	-0.265303	-0.177684	-0.191041	-0.190124	-0.17773	-0.177781	-0.191299	-0.190692		86737	-0.00199894	-0.00205447	-0.0101271	-0.00241374	-0.00198722	-0.0020846	-0.00241173	-0.00237502	-0.00199182	-0.00197858		86737	-0.0019842	-0.00205412	0.00129925	-0.00241366	-0.00197263	-0.00208425	-0.00241165	-0.00237498	-0.0019774	-0.00196394
86738	-0.345187	-0.347231	-0.280061	-0.354422	-0.344974	-0.347108	-0.354443	-0.354495	-0.345278	-0.344634		86738	-0.191659	-0.190578	-0.265952	-0.178058	-0.191438	-0.190522	-0.178105	-0.178155	-0.191696	-0.19109		86738	-0.00199901	-0.00205447	-0.0101712	-0.00241374	-0.00198729	-0.0020846	-0.00241173	-0.00237502	-0.00199189	-0.00197866		86738	-0.0019842	-0.00205412	0.00129822	-0.00241366	-0.00197263	-0.00208425	-0.00241165	-0.00237498	-0.0019774	-0.00196394
86739	-0.345852	-0.347898	-0.280681	-0.355098	-0.345639	-0.347775	-0.355118	-0.35517	-0.345943	-0.3453		86739	-0.192054	-0.190975	-0.2666	-0.178432	-0.191835	-0.190918	-0.178478	-0.178529	-0.192092	-0.191488		86739	-0.00199908	-0.00205447	-0.0102154	-0.00241374	-0.00198736	-0.0020846	-0.00241173	-0.00237502	-0.00199196	-0.00197873		86739	-0.0019842	-0.00205412	0.00129718	-0.00241366	-0.00197264	-0.00208425	-0.00241165	-0.00237498	-0.0019774	-0.00196395
86740	-0.346516	-0.348564	-0.2813	-0.355771	-0.346303	-0.348441	-0.355791	-0.355844	-0.346607	-0.345965		86740	-0.192449	-0.19137	-0.267246	-0.178805	-0.19223	-0.191314	-0.178851	-0.178902	-0.192486	-0.191884		86740	-0.00199915	-0.00205447	-0.0102594	-0.00241374	-0.00198743	-0.0020846	-0.00241173	-0.00237502	-0.00199203	-0.0019788		86740	-0.0019842	-0.00205412	0.00129615	-0.00241366	-0.00197264	-0.00208425	-0.00241165	-0.00237498	-0.0019774	-0.00196395
86741	-0.347178	-0.349228	-0.281918	-0.356443	-0.346966	-0.349105	-0.356463	-0.356516	-0.347269	-0.346628		86741	-0.192843	-0.191765	-0.267891	-0.179178	-0.192625	-0.191708	-0.179224	-0.179274	-0.19288	-0.192279		86741	-0.00199922	-0.00205447	-0.0103035	-0.00241374	-0.0019875	-0.00208461	-0.00241173	-0.00237502	-0.0019921	-0.00197887		86741	-0.0019842	-0.00205412	0.00129511	-0.00241366	-0.00197264	-0.00208425	-0.00241165	-0.00237498	-0.0019774	-0.00196395
86742	-0.347838	-0.349891	-0.282535	-0.357114	-0.347626	-0.349767	-0.357134	-0.357186	-0.347929	-0.347289		86742	-0.193236	-0.192159	-0.268535	-0.179549	-0.193018	-0.192102	-0.179595	-0.179645	-0.193273	-0.192673		86742	-0.00199929	-0.00205447	-0.0103476	-0.00241374	-0.00198757	-0.00208461	-0.00241173	-0.00237502	-0.00199216	-0.00197894		86742	-0.00198421	-0.00205412	0.00129407	-0.00241366	-0.00197264	-0.00208425	-0.00241165	-0.00237498	-0.0019774	-0.00196395
86743	-0.348497	-0.350552	-0.28315	-0.357783	-0.348286	-0.350428	-0.357803	-0.357855	-0.348588	-0.347949		86743	-0.193628	-0.192552	-0.269177	-0.17992	-0.193411	-0.192495	-0.179965	-0.180016	-0.193666	-0.193066		86743	-0.00199936	-0.00205448	-0.0103916	-0.00241374	-0.00198764	-0.00208461	-0.00241173	-0.00237502	-0.00199223	-0.00197901		86743	-0.00198421	-0.00205412	0.00129303	-0.00241366	-0.00197264	-0.00208425	-0.00241165	-0.00237498	-0.0019774	-0.00196395
86744	-0.349155	-0.351212	-0.283764	-0.358451	-0.348944	-0.351088	-0.35847	-0.358522	-0.349246	-0.348607		86744	-0.194019	-0.192944	-0.269819	-0.18029	-0.193802	-0.192886	-0.180335	-0.180386	-0.194057	-0.193458		86744	-0.00199943	-0.00205448	-0.0104356	-0.00241374	-0.00198771	-0.00208461	-0.00241173	-0.00237502	-0.0019923	-0.00197908		86744	-0.00198421	-0.00205412	0.001292	-0.00241366	-0.00197264	-0.00208425	-0.00241165	-0.00237498	-0.0019774	-0.00196395
86745	-0.349811	-0.35187	-0.284377	-0.359116	-0.3496	-0.351746	-0.359136	-0.359188	-0.349902	-0.349264		86745	-0.194409	-0.193335	-0.270459	-0.180659	-0.194193	-0.193277	-0.180704	-0.180755	-0.194447	-0.19385		86745	-0.0019995	-0.00205448	-0.0104796	-0.00241374	-0.00198778	-0.00208461	-0.00241173	-0.00237502	-0.00199237	-0.00197915		86745	-0.00198421	-0.00205412	0.00129096	-0.00241366	-0.00197264	-0.00208425	-0.00241165	-0.00237498	-0.00197741	-0.00196395
86746	-0.350465	-0.352527	-0.284989	-0.359781	-0.350255	-0.352402	-0.3598	-0.359853	-0.350556	-0.34992		86746	-0.194798	-0.193725	-0.271097	-0.181027	-0.194582	-0.193667	-0.181073	-0.181123	-0.194836	-0.19424		86746	-0.00199957	-0.00205448	-0.0105236	-0.00241374	-0.00198785	-0.00208462	-0.00241173	-0.00237502	-0.00199244	-0.00197922		86746	-0.00198421	-0.00205412	0.00128992	-0.00241366	-0.00197264	-0.00208425	-0.00241165	-0.00237498	-0.00197741	-0.00196396
86747	-0.351118	-0.353182	-0.2856	-0.360444	-0.350908	-0.353057	-0.360463	-0.360515	-0.351209	-0.350574		86747	-0.195186	-0.194114	-0.271735	-0.181395	-0.194971	-0.194056	-0.18144	-0.181491	-0.195224	-0.194629		86747	-0.00199964	-0.00205448	-0.0105675	-0.00241374	-0.00198792	-0.00208462	-0.00241173	-0.00237502	-0.0019925	-0.00197929		86747	-0.00198421	-0.00205412	0.00128889	-0.00241366	-0.00197265	-0.00208425	-0.00241165	-0.00237498	-0.00197741	-0.00196396
86748	-0.351769	-0.353836	-0.286209	-0.361105	-0.35156	-0.35371	-0.361124	-0.361177	-0.351861	-0.351226		86748	-0.195573	-0.194502	-0.272371	-0.181762	-0.195359	-0.194444	-0.181807	-0.181857	-0.195612	-0.195018		86748	-0.00199971	-0.00205449	-0.0106114	-0.00241374	-0.00198799	-0.00208462	-0.00241173	-0.00237502	-0.00199257	-0.00197936		86748	-0.00198421	-0.00205412	0.00128785	-0.00241366	-0.00197265	-0.00208425	-0.00241165	-0.00237498	-0.00197741	-0.00196396
86749	-0.352419	-0.354488	-0.286817	-0.361765	-0.352211	-0.354362	-0.361784	-0.361836	-0.352511	-0.351877		86749	-0.195959	-0.194889	-0.273006	-0.182128	-0.195746	-0.194831	-0.182173	-0.182223	-0.195998	-0.195405		86749	-0.00199978	-0.00205449	-0.0106553	-0.00241374	-0.00198806	-0.00208462	-0.00241173	-0.00237502	-0.00199264	-0.00197943		86749	-0.00198421	-0.00205412	0.00128681	-0.00241366	-0.00197265	-0.00208425	-0.00241165	-0.00237498	-0.00197741	-0.00196396
86750	-0.353068	-0.355138	-0.287425	-0.362423	-0.35286	-0.355013	-0.362442	-0.362494	-0.35316	-0.352526		86750	-0.196344	-0.195275	-0.273639	-0.182493	-0.196132	-0.195217	-0.182538	-0.182589	-0.196383	-0.195792		86750	-0.00199985	-0.00205449	-0.0106992	-0.00241374	-0.00198813	-0.00208462	-0.00241173	-0.00237502	-0.00199271	-0.0019795		86750	-0.00198422	-0.00205412	0.00128578	-0.00241366	-0.00197265	-0.00208425	-0.00241165	-0.00237498	-0.00197741	-0.00196396
86751	-0.353715	-0.355788	-0.288031	-0.36308	-0.353507	-0.355662	-0.363099	-0.363151	-0.353807	-0.353174		86751	-0.196729	-0.195661	-0.274271	-0.182858	-0.196517	-0.195603	-0.182903	-0.182953	-0.196768	-0.196177		86751	-0.00199992	-0.00205449	-0.0107431	-0.00241374	-0.0019882	-0.00208463	-0.00241173	-0.00237502	-0.00199278	-0.00197957		86751	-0.00198422	-0.00205412	0.00128474	-0.00241366	-0.00197265	-0.00208425	-0.00241165	-0.00237498	-0.00197741	-0.00196396
86752	-0.35436	-0.356435	-0.288635	-0.363735	-0.354153	-0.356309	-0.363754	-0.363806	-0.354452	-0.353821		86752	-0.197112	-0.196045	-0.274903	-0.183222	-0.196901	-0.195987	-0.183266	-0.183317	-0.197151	-0.196562		86752	-0.00199999	-0.00205449	-0.0107869	-0.00241374	-0.00198827	-0.00208463	-0.00241173	-0.00237502	-0.00199285	-0.00197964		86752	-0.00198422	-0.00205412	0.0012837	-0.00241366	-0.00197265	-0.00208425	-0.00241165	-0.00237498	-0.00197741	-0.00196396
86753	-0.355004	-0.357082	-0.289239	-0.364389	-0.354797	-0.356955	-0.364408	-0.36446	-0.355096	-0.354466		86753	-0.197495	-0.196429	-0.275532	-0.183585	-0.197284	-0.19637	-0.183629	-0.18368	-0.197534	-0.196946		86753	-0.00200006	-0.0020545	-0.0108307	-0.00241374	-0.00198834	-0.00208463	-0.00241173	-0.00237503	-0.00199291	-0.00197971		86753	-0.00198422	-0.00205412	0.00128266	-0.00241366	-0.00197265	-0.00208425	-0.00241165	-0.00237498	-0.00197742	-0.00196396
86754	-0.355647	-0.357726	-0.289841	-0.365042	-0.35544	-0.3576	-0.36506	-0.365112	-0.355739	-0.355109		86754	-0.197876	-0.196811	-0.276161	-0.183947	-0.197666	-0.196753	-0.183992	-0.184042	-0.197916	-0.197328		86754	-0.00200013	-0.0020545	-0.0108745	-0.00241374	-0.00198841	-0.00208463	-0.00241173	-0.00237503	-0.00199298	-0.00197979		86754	-0.00198422	-0.00205412	0.00128163	-0.00241366	-0.00197265	-0.00208425	-0.00241165	-0.00237498	-0.00197742	-0.00196397
86755	-0.356288	-0.35837	-0.290443	-0.365692	-0.356082	-0.358243	-0.365711	-0.365763	-0.35638	-0.355752		86755	-0.198257	-0.197193	-0.276788	-0.184309	-0.198047	-0.197134	-0.184353	-0.184404	-0.198296	-0.19771		86755	-0.0020002	-0.0020545	-0.0109183	-0.00241374	-0.00198847	-0.00208463	-0.00241173	-0.00237503	-0.00199305	-0.00197986		86755	-0.00198422	-0.00205412	0.00128059	-0.00241366	-0.00197266	-0.00208425	-0.00241165	-0.00237498	-0.00197742	-0.00196397
86756	-0.356927	-0.359011	-0.291043	-0.366342	-0.356722	-0.358884	-0.36636	-0.366412	-0.35702	-0.356392		86756	-0.198637	-0.197574	-0.277414	-0.184669	-0.198427	-0.197515	-0.184714	-0.184764	-0.198676	-0.198091		86756	-0.00200027	-0.0020545	-0.010962	-0.00241374	-0.00198854	-0.00208464	-0.00241173	-0.00237503	-0.00199312	-0.00197993		86756	-0.00198422	-0.00205412	0.00127955	-0.00241366	-0.00197266	-0.00208425	-0.00241165	-0.00237498	-0.00197742	-0.00196397
86757	-0.357566	-0.359652	-0.291642	-0.36699	-0.357361	-0.359524	-0.367008	-0.36706	-0.357658	-0.357031		86757	-0.199015	-0.197954	-0.278039	-0.18503	-0.198807	-0.197895	-0.185074	-0.185124	-0.199055	-0.198471		86757	-0.00200034	-0.0020545	-0.0110057	-0.00241375	-0.00198861	-0.00208464	-0.00241174	-0.00237503	-0.00199319	-0.00198		86757	-0.00198422	-0.00205412	0.00127851	-0.00241366	-0.00197266	-0.00208425	-0.00241165	-0.00237498	-0.00197742	-0.00196397
86758	-0.358202	-0.360291	-0.29224	-0.367636	-0.357998	-0.360163	-0.367654	-0.367706	-0.358295	-0.357669		86758	-0.199393	-0.198332	-0.278663	-0.185389	-0.199185	-0.198274	-0.185433	-0.185484	-0.199433	-0.19885		86758	-0.00200041	-0.00205451	-0.0110495	-0.00241375	-0.00198868	-0.00208464	-0.00241174	-0.00237503	-0.00199326	-0.00198007		86758	-0.00198423	-0.00205412	0.00127747	-0.00241366	-0.00197266	-0.00208425	-0.00241165	-0.00237498	-0.00197742	-0.00196397
86759	-0.358838	-0.360928	-0.292837	-0.368281	-0.358634	-0.3608	-0.368299	-0.368351	-0.358931	-0.358305		86759	-0.19977	-0.19871	-0.279285	-0.185747	-0.199563	-0.198651	-0.185792	-0.185842	-0.19981	-0.199228		86759	-0.00200048	-0.00205451	-0.0110931	-0.00241375	-0.00198875	-0.00208464	-0.00241174	-0.00237503	-0.00199333	-0.00198014		86759	-0.00198423	-0.00205412	0.00127644	-0.00241366	-0.00197266	-0.00208425	-0.00241165	-0.00237498	-0.00197742	-0.00196397
86760	-0.359472	-0.361564	-0.293432	-0.368925	-0.359268	-0.361436	-0.368942	-0.368994	-0.359565	-0.35894		86760	-0.200146	-0.199088	-0.279907	-0.186105	-0.199939	-0.199028	-0.186149	-0.1862	-0.200186	-0.199606		86760	-0.00200055	-0.00205451	-0.0111368	-0.00241375	-0.00198882	-0.00208464	-0.00241174	-0.00237503	-0.00199339	-0.00198021		86760	-0.00198423	-0.00205412	0.0012754	-0.00241366	-0.00197266	-0.00208425	-0.00241165	-0.00237498	-0.00197742	-0.00196397
86761	-0.360104	-0.362199	-0.294027	-0.369567	-0.359901	-0.362071	-0.369584	-0.369636	-0.360197	-0.359574		86761	-0.200521	-0.199464	-0.280527	-0.186462	-0.200315	-0.199405	-0.186507	-0.186557	-0.200562	-0.199982		86761	-0.00200062	-0.00205451	-0.0111804	-0.00241375	-0.00198889	-0.00208465	-0.00241174	-0.00237503	-0.00199346	-0.00198028		86761	-0.00198423	-0.00205412	0.00127436	-0.00241366	-0.00197266	-0.00208425	-0.00241165	-0.00237498	-0.00197743	-0.00196397
86762	-0.360735	-0.362832	-0.29462	-0.370207	-0.360532	-0.362704	-0.370224	-0.370277	-0.360828	-0.360206		86762	-0.200895	-0.199839	-0.281145	-0.186819	-0.20069	-0.19978	-0.186863	-0.186913	-0.200936	-0.200357		86762	-0.00200069	-0.00205451	-0.011224	-0.00241375	-0.00198896	-0.00208465	-0.00241174	-0.00237503	-0.00199353	-0.00198035		86762	-0.00198423	-0.00205412	0.00127332	-0.00241366	-0.00197266	-0.00208425	-0.00241165	-0.00237498	-0.00197743	-0.00196398
86763	-0.361365	-0.363464	-0.295213	-0.370846	-0.361163	-0.363335	-0.370864	-0.370916	-0.361458	-0.360836		86763	-0.201269	-0.200214	-0.281763	-0.187175	-0.201064	-0.200154	-0.187218	-0.187269	-0.201309	-0.200732		86763	-0.00200076	-0.00205452	-0.0112676	-0.00241375	-0.00198903	-0.00208465	-0.00241174	-0.00237503	-0.0019936	-0.00198042		86763	-0.00198423	-0.00205412	0.00127229	-0.00241366	-0.00197267	-0.00208425	-0.00241165	-0.00237498	-0.00197743	-0.00196398
86764	-0.361993	-0.364094	-0.295804	-0.371484	-0.361791	-0.363965	-0.371501	-0.371553	-0.362086	-0.361465		86764	-0.201641	-0.200587	-0.282379	-0.18753	-0.201437	-0.200527	-0.187573	-0.187624	-0.201682	-0.201106		86764	-0.00200083	-0.00205452	-0.0113112	-0.00241375	-0.0019891	-0.00208465	-0.00241174	-0.00237503	-0.00199367	-0.0019805		86764	-0.00198423	-0.00205412	0.00127125	-0.00241366	-0.00197267	-0.00208425	-0.00241165	-0.00237498	-0.00197743	-0.00196398
86765	-0.36262	-0.364723	-0.296394	-0.37212	-0.362418	-0.364594	-0.372137	-0.37219	-0.362713	-0.362093		86765	-0.202013	-0.20096	-0.282995	-0.187884	-0.201809	-0.2009	-0.187927	-0.187978	-0.202054	-0.201478		86765	-0.0020009	-0.00205452	-0.0113547	-0.00241375	-0.00198917	-0.00208465	-0.00241174	-0.00237503	-0.00199374	-0.00198057		86765	-0.00198423	-0.00205412	0.00127021	-0.00241366	-0.00197267	-0.00208425	-0.00241165	-0.00237498	-0.00197743	-0.00196398
86766	-0.363245	-0.365351	-0.296983	-0.372755	-0.363044	-0.365221	-0.372772	-0.372824	-0.363339	-0.36272		86766	-0.202383	-0.201331	-0.283609	-0.188237	-0.20218	-0.201272	-0.188281	-0.188331	-0.202424	-0.20185		86766	-0.00200097	-0.00205452	-0.0113983	-0.00241375	-0.00198924	-0.00208465	-0.00241174	-0.00237503	-0.00199381	-0.00198064		86766	-0.00198424	-0.00205412	0.00126917	-0.00241366	-0.00197267	-0.00208425	-0.00241165	-0.00237498	-0.00197743	-0.00196398
86767	-0.363869	-0.365977	-0.297571	-0.373389	-0.363669	-0.365847	-0.373405	-0.373458	-0.363963	-0.363345		86767	-0.202753	-0.201702	-0.284222	-0.18859	-0.202551	-0.201642	-0.188633	-0.188684	-0.202794	-0.202221		86767	-0.00200104	-0.00205452	-0.0114417	-0.00241375	-0.00198931	-0.00208466	-0.00241174	-0.00237503	-0.00199387	-0.00198071		86767	-0.00198424	-0.00205412	0.00126814	-0.00241366	-0.00197267	-0.00208425	-0.00241165	-0.00237498	-0.00197743	-0.00196398
86768	-0.364492	-0.366602	-0.298158	-0.374021	-0.364292	-0.366472	-0.374037	-0.374089	-0.364586	-0.363968		86768	-0.203122	-0.202072	-0.284833	-0.188942	-0.20292	-0.202012	-0.188985	-0.189036	-0.203163	-0.202591		86768	-0.00200111	-0.00205453	-0.0114852	-0.00241375	-0.00198938	-0.00208466	-0.00241174	-0.00237503	-0.00199394	-0.00198078		86768	-0.00198424	-0.00205412	0.0012671	-0.00241366	-0.00197267	-0.00208425	-0.00241165	-0.00237498	-0.00197743	-0.00196398
86769	-0.365113	-0.367225	-0.298743	-0.374651	-0.364914	-0.367095	-0.374668	-0.37472	-0.365207	-0.36459		86769	-0.20349	-0.202441	-0.285444	-0.189293	-0.203288	-0.202381	-0.189337	-0.189387	-0.203531	-0.20296		86769	-0.00200118	-0.00205453	-0.0115287	-0.00241375	-0.00198945	-0.00208466	-0.00241174	-0.00237503	-0.00199401	-0.00198085		86769	-0.00198424	-0.00205412	0.00126606	-0.00241366	-0.00197267	-0.00208425	-0.00241165	-0.00237498	-0.00197744	-0.00196398
86770	-0.365733	-0.367847	-0.299328	-0.375281	-0.365534	-0.367717	-0.375297	-0.375349	-0.365827	-0.365211		86770	-0.203857	-0.20281	-0.286053	-0.189644	-0.203656	-0.202749	-0.189687	-0.189738	-0.203899	-0.203328		86770	-0.00200125	-0.00205453	-0.0115721	-0.00241375	-0.00198952	-0.00208466	-0.00241174	-0.00237503	-0.00199408	-0.00198092		86770	-0.00198424	-0.00205412	0.00126502	-0.00241366	-0.00197267	-0.00208425	-0.00241165	-0.00237498	-0.00197744	-0.00196399
86771	-0.366352	-0.368468	-0.299911	-0.375908	-0.366153	-0.368337	-0.375925	-0.375977	-0.366446	-0.36583		86771	-0.204223	-0.203177	-0.286661	-0.189994	-0.204023	-0.203117	-0.190037	-0.190088	-0.204265	-0.203696		86771	-0.00200132	-0.00205453	-0.0116155	-0.00241375	-0.00198959	-0.00208466	-0.00241174	-0.00237503	-0.00199415	-0.00198099		86771	-0.00198424	-0.00205412	0.00126398	-0.00241366	-0.00197268	-0.00208425	-0.00241165	-0.00237498	-0.00197744	-0.00196399
86772	-0.366969	-0.369087	-0.300494	-0.376535	-0.36677	-0.368956	-0.376551	-0.376603	-0.367063	-0.366449		86772	-0.204588	-0.203544	-0.287268	-0.190343	-0.204389	-0.203483	-0.190386	-0.190437	-0.20463	-0.204062		86772	-0.00200139	-0.00205453	-0.0116589	-0.00241375	-0.00198966	-0.00208467	-0.00241174	-0.00237503	-0.00199422	-0.00198106		86772	-0.00198424	-0.00205412	0.00126295	-0.00241366	-0.00197268	-0.00208425	-0.00241165	-0.00237498	-0.00197744	-0.00196399
86773	-0.367585	-0.369705	-0.301075	-0.37716	-0.367387	-0.369574	-0.377176	-0.377228	-0.367679	-0.367065		86773	-0.204953	-0.203909	-0.287874	-0.190691	-0.204754	-0.203849	-0.190734	-0.190785	-0.204995	-0.204428		86773	-0.00200146	-0.00205453	-0.0117022	-0.00241375	-0.00198973	-0.00208467	-0.00241174	-0.00237503	-0.00199429	-0.00198114		86773	-0.00198424	-0.00205412	0.00126191	-0.00241366	-0.00197268	-0.00208425	-0.00241165	-0.00237498	-0.00197744	-0.00196399
86774	-0.368199	-0.370321	-0.301655	-0.377784	-0.368001	-0.37019	-0.377799	-0.377851	-0.368293	-0.367681		86774	-0.205316	-0.204274	-0.288478	-0.191039	-0.205118	-0.204213	-0.191082	-0.191133	-0.205359	-0.204793		86774	-0.00200153	-0.00205454	-0.0117456	-0.00241375	-0.0019898	-0.00208467	-0.00241174	-0.00237503	-0.00199436	-0.00198121		86774	-0.00198425	-0.00205412	0.00126087	-0.00241366	-0.00197268	-0.00208425	-0.00241165	-0.00237498	-0.00197744	-0.00196399
86775	-0.368812	-0.370936	-0.302234	-0.378406	-0.368615	-0.370805	-0.378422	-0.378474	-0.368906	-0.368294		86775	-0.205679	-0.204638	-0.289082	-0.191386	-0.205481	-0.204577	-0.191429	-0.19148	-0.205722	-0.205157		86775	-0.0020016	-0.00205454	-0.0117889	-0.00241375	-0.00198988	-0.00208467	-0.00241174	-0.00237503	-0.00199442	-0.00198128		86775	-0.00198425	-0.00205412	0.00125983	-0.00241366	-0.00197268	-0.00208425	-0.00241165	-0.00237498	-0.00197744	-0.00196399
86776	-0.369424	-0.37155	-0.302812	-0.379027	-0.369227	-0.371418	-0.379042	-0.379094	-0.369518	-0.368907		86776	-0.206041	-0.205001	-0.289684	-0.191733	-0.205844	-0.20494	-0.191775	-0.191826	-0.206083	-0.20552		86776	-0.00200167	-0.00205454	-0.0118322	-0.00241375	-0.00198995	-0.00208467	-0.00241174	-0.00237503	-0.00199449	-0.00198135		86776	-0.00198425	-0.00205412	0.0012588	-0.00241366	-0.00197268	-0.00208425	-0.00241165	-0.00237498	-0.00197744	-0.00196399
86777	-0.370034	-0.372162	-0.303389	-0.379646	-0.369838	-0.372031	-0.379662	-0.379714	-0.370129	-0.369518		86777	-0.206402	-0.205363	-0.290285	-0.192078	-0.206205	-0.205302	-0.192121	-0.192172	-0.206445	-0.205882		86777	-0.00200174	-0.00205454	-0.0118754	-0.00241375	-0.00199002	-0.00208468	-0.00241174	-0.00237503	-0.00199456	-0.00198142		86777	-0.00198425	-0.00205412	0.00125776	-0.00241366	-0.00197268	-0.00208425	-0.00241165	-0.00237498	-0.00197745	-0.001964
86778	-0.370643	-0.372774	-0.303965	-0.380264	-0.370447	-0.372641	-0.38028	-0.380332	-0.370738	-0.370128		86778	-0.206762	-0.205724	-0.290885	-0.192423	-0.206566	-0.205663	-0.192466	-0.192516	-0.206805	-0.206243		86778	-0.00200181	-0.00205454	-0.0119186	-0.00241375	-0.00199009	-0.00208468	-0.00241174	-0.00237504	-0.00199463	-0.00198149		86778	-0.00198425	-0.00205412	0.00125672	-0.00241366	-0.00197269	-0.00208425	-0.00241165	-0.00237498	-0.00197745	-0.001964
86779	-0.371251	-0.373383	-0.30454	-0.380881	-0.371055	-0.373251	-0.380896	-0.380948	-0.371345	-0.370737		86779	-0.207121	-0.206085	-0.291484	-0.192767	-0.206926	-0.206024	-0.19281	-0.192861	-0.207164	-0.206603		86779	-0.00200188	-0.00205455	-0.0119619	-0.00241375	-0.00199016	-0.00208468	-0.00241174	-0.00237504	-0.0019947	-0.00198156		86779	-0.00198425	-0.00205412	0.00125568	-0.00241366	-0.00197269	-0.00208425	-0.00241165	-0.00237498	-0.00197745	-0.001964
86780	-0.371857	-0.373992	-0.305114	-0.381497	-0.371662	-0.373859	-0.381512	-0.381564	-0.371952	-0.371344		86780	-0.20748	-0.206444	-0.292082	-0.193111	-0.207285	-0.206383	-0.193153	-0.193204	-0.207523	-0.206963		86780	-0.00200195	-0.00205455	-0.012005	-0.00241375	-0.00199023	-0.00208468	-0.00241174	-0.00237504	-0.00199477	-0.00198163		86780	-0.00198425	-0.00205412	0.00125464	-0.00241366	-0.00197269	-0.00208425	-0.00241165	-0.00237498	-0.00197745	-0.001964
86781	-0.372462	-0.374599	-0.305687	-0.382111	-0.372267	-0.374466	-0.382126	-0.382178	-0.372557	-0.37195		86781	-0.207837	-0.206803	-0.292678	-0.193454	-0.207643	-0.206742	-0.193496	-0.193547	-0.20788	-0.207322		86781	-0.00200202	-0.00205455	-0.0120482	-0.00241375	-0.0019903	-0.00208468	-0.00241175	-0.00237504	-0.00199484	-0.00198171		86781	-0.00198426	-0.00205412	0.00125361	-0.00241366	-0.00197269	-0.00208425	-0.00241165	-0.00237498	-0.00197745	-0.001964
86782	-0.373066	-0.375204	-0.306259	-0.382723	-0.372872	-0.375071	-0.382738	-0.38279	-0.373161	-0.372555		86782	-0.208194	-0.207161	-0.293274	-0.193796	-0.208	-0.2071	-0.193838	-0.193889	-0.208237	-0.207679		86782	-0.00200209	-0.00205455	-0.0120913	-0.00241375	-0.00199037	-0.00208469	-0.00241175	-0.00237504	-0.00199491	-0.00198178		86782	-0.00198426	-0.00205412	0.00125257	-0.00241366	-0.00197269	-0.00208425	-0.00241165	-0.00237498	-0.00197745	-0.001964
86783	-0.373668	-0.375809	-0.306829	-0.383335	-0.373474	-0.375676	-0.38335	-0.383402	-0.373763	-0.373158		86783	-0.20855	-0.207518	-0.293868	-0.194137	-0.208356	-0.207457	-0.194179	-0.19423	-0.208593	-0.208036		86783	-0.00200216	-0.00205455	-0.0121345	-0.00241376	-0.00199044	-0.00208469	-0.00241175	-0.00237504	-0.00199497	-0.00198185		86783	-0.00198426	-0.00205412	0.00125153	-0.00241366	-0.00197269	-0.00208425	-0.00241165	-0.00237498	-0.00197745	-0.001964
86784	-0.374269	-0.376412	-0.307399	-0.383945	-0.374076	-0.376278	-0.38396	-0.384012	-0.374364	-0.37376		86784	-0.208905	-0.207874	-0.294461	-0.194478	-0.208712	-0.207813	-0.19452	-0.194571	-0.208948	-0.208393		86784	-0.00200223	-0.00205456	-0.0121776	-0.00241376	-0.00199051	-0.00208469	-0.00241175	-0.00237504	-0.00199504	-0.00198192		86784	-0.00198426	-0.00205412	0.00125049	-0.00241366	-0.00197269	-0.00208425	-0.00241165	-0.00237498	-0.00197745	-0.001964
86785	-0.374869	-0.377014	-0.307967	-0.384554	-0.374676	-0.37688	-0.384568	-0.38462	-0.374964	-0.37436		86785	-0.209259	-0.20823	-0.295053	-0.194818	-0.209067	-0.208168	-0.19486	-0.194911	-0.209303	-0.208748		86785	-0.0020023	-0.00205456	-0.0122206	-0.00241376	-0.00199058	-0.00208469	-0.00241175	-0.00237504	-0.00199511	-0.00198199		86785	-0.00198426	-0.00205412	0.00124946	-0.00241366	-0.00197269	-0.00208425	-0.00241165	-0.00237498	-0.00197746	-0.00196401
86786	-0.375467	-0.377614	-0.308535	-0.385161	-0.375275	-0.37748	-0.385176	-0.385227	-0.375563	-0.37496		86786	-0.209612	-0.208584	-0.295644	-0.195157	-0.209421	-0.208523	-0.195199	-0.19525	-0.209656	-0.209102		86786	-0.00200237	-0.00205456	-0.0122637	-0.00241376	-0.00199065	-0.00208469	-0.00241175	-0.00237504	-0.00199518	-0.00198206		86786	-0.00198426	-0.00205412	0.00124842	-0.00241366	-0.0019727	-0.00208425	-0.00241165	-0.00237498	-0.00197746	-0.00196401
86787	-0.376065	-0.378213	-0.309101	-0.385767	-0.375872	-0.378079	-0.385782	-0.385833	-0.37616	-0.375558		86787	-0.209965	-0.208938	-0.296234	-0.195496	-0.209774	-0.208876	-0.195538	-0.195589	-0.210009	-0.209456		86787	-0.00200244	-0.00205456	-0.0123067	-0.00241376	-0.00199072	-0.0020847	-0.00241175	-0.00237504	-0.00199525	-0.00198213		86787	-0.00198426	-0.00205412	0.00124738	-0.00241366	-0.0019727	-0.00208425	-0.00241165	-0.00237498	-0.00197746	-0.00196401
86788	-0.37666	-0.378811	-0.309667	-0.386372	-0.376469	-0.378677	-0.386386	-0.386438	-0.376756	-0.376154		86788	-0.210316	-0.209291	-0.296823	-0.195834	-0.210126	-0.209229	-0.195875	-0.195926	-0.21036	-0.209809		86788	-0.00200251	-0.00205456	-0.0123497	-0.00241376	-0.00199079	-0.0020847	-0.00241175	-0.00237504	-0.00199532	-0.0019822		86788	-0.00198426	-0.00205412	0.00124634	-0.00241366	-0.0019727	-0.00208425	-0.00241165	-0.00237498	-0.00197746	-0.00196401
86789	-0.377255	-0.379408	-0.310231	-0.386975	-0.377064	-0.379273	-0.386989	-0.387041	-0.377351	-0.37675		86789	-0.210667	-0.209643	-0.29741	-0.196171	-0.210477	-0.209581	-0.196213	-0.196264	-0.210711	-0.210161		86789	-0.00200258	-0.00205457	-0.0123926	-0.00241376	-0.00199086	-0.0020847	-0.00241175	-0.00237504	-0.00199539	-0.00198228		86789	-0.00198427	-0.00205412	0.00124531	-0.00241366	-0.0019727	-0.00208425	-0.00241165	-0.00237498	-0.00197746	-0.00196401
86790	-0.377848	-0.380003	-0.310795	-0.387577	-0.377657	-0.379868	-0.387591	-0.387643	-0.377944	-0.377344		86790	-0.211017	-0.209994	-0.297997	-0.196508	-0.210828	-0.209932	-0.196549	-0.1966	-0.211061	-0.210512		86790	-0.00200265	-0.00205457	-0.0124356	-0.00241376	-0.00199093	-0.0020847	-0.00241175	-0.00237504	-0.00199546	-0.00198235		86790	-0.00198427	-0.00205412	0.00124427	-0.00241366	-0.0019727	-0.00208425	-0.00241165	-0.00237498	-0.00197746	-0.00196401
86791	-0.37844	-0.380597	-0.311357	-0.388178	-0.37825	-0.380462	-0.388192	-0.388244	-0.378536	-0.377937		86791	-0.211366	-0.210345	-0.298582	-0.196844	-0.211177	-0.210283	-0.196885	-0.196936	-0.211411	-0.210862		86791	-0.00200273	-0.00205457	-0.0124785	-0.00241376	-0.001991	-0.0020847	-0.00241175	-0.00237504	-0.00199553	-0.00198242		86791	-0.00198427	-0.00205412	0.00124323	-0.00241366	-0.0019727	-0.00208425	-0.00241165	-0.00237498	-0.00197746	-0.00196401
86792	-0.379031	-0.38119	-0.311919	-0.388778	-0.378841	-0.381055	-0.388792	-0.388843	-0.379127	-0.378528		86792	-0.211714	-0.210695	-0.299167	-0.197179	-0.211526	-0.210632	-0.19722	-0.197271	-0.211759	-0.211211		86792	-0.0020028	-0.00205457	-0.0125214	-0.00241376	-0.00199107	-0.00208471	-0.00241175	-0.00237504	-0.00199559	-0.00198249		86792	-0.00198427	-0.00205412	0.0012422	-0.00241366	-0.0019727	-0.00208425	-0.00241165	-0.00237498	-0.00197746	-0.00196401
86793	-0.37962	-0.381781	-0.312479	-0.389376	-0.37943	-0.381646	-0.38939	-0.389442	-0.379716	-0.379119		86793	-0.212062	-0.211043	-0.29975	-0.197513	-0.211874	-0.210981	-0.197555	-0.197606	-0.212107	-0.21156		86793	-0.00200287	-0.00205457	-0.0125643	-0.00241376	-0.00199114	-0.00208471	-0.00241175	-0.00237504	-0.00199566	-0.00198256		86793	-0.00198427	-0.00205412	0.00124116	-0.00241366	-0.0019727	-0.00208425	-0.00241165	-0.00237498	-0.00197747	-0.00196402
86794	-0.380209	-0.382371	-0.313038	-0.389973	-0.380019	-0.382236	-0.389987	-0.390038	-0.380305	-0.379708		86794	-0.212408	-0.211391	-0.300332	-0.197847	-0.212221	-0.211329	-0.197888	-0.197939	-0.212453	-0.211908		86794	-0.00200294	-0.00205458	-0.0126071	-0.00241376	-0.00199121	-0.00208471	-0.00241175	-0.00237504	-0.00199573	-0.00198263		86794	-0.00198427	-0.00205412	0.00124012	-0.00241366	-0.00197271	-0.00208425	-0.00241165	-0.00237498	-0.00197747	-0.00196402
86795	-0.380795	-0.38296	-0.313597	-0.390569	-0.380606	-0.382824	-0.390582	-0.390634	-0.380892	-0.380295		86795	-0.212754	-0.211738	-0.300913	-0.198181	-0.212568	-0.211676	-0.198222	-0.198273	-0.212799	-0.212255		86795	-0.00200301	-0.00205458	-0.0126499	-0.00241376	-0.00199128	-0.00208471	-0.00241175	-0.00237504	-0.0019958	-0.0019827		86795	-0.00198427	-0.00205412	0.00123909	-0.00241366	-0.00197271	-0.00208425	-0.00241165	-0.00237498	-0.00197747	-0.00196402
86796	-0.381381	-0.383547	-0.314154	-0.391163	-0.381192	-0.383412	-0.391176	-0.391228	-0.381477	-0.380882		86796	-0.213099	-0.212085	-0.301493	-0.198513	-0.212913	-0.212022	-0.198554	-0.198605	-0.213144	-0.212601		86796	-0.00200308	-0.00205458	-0.0126927	-0.00241376	-0.00199135	-0.00208471	-0.00241175	-0.00237504	-0.00199587	-0.00198278		86796	-0.00198427	-0.00205412	0.00123805	-0.00241366	-0.00197271	-0.00208425	-0.00241165	-0.00237498	-0.00197747	-0.00196402
86797	-0.381965	-0.384134	-0.31471	-0.391756	-0.381777	-0.383998	-0.391769	-0.391821	-0.382062	-0.381467		86797	-0.213443	-0.21243	-0.302072	-0.198845	-0.213258	-0.212368	-0.198886	-0.198937	-0.213489	-0.212946		86797	-0.00200315	-0.00205458	-0.0127355	-0.00241376	-0.00199142	-0.00208472	-0.00241175	-0.00237504	-0.00199594	-0.00198285		86797	-0.00198428	-0.00205412	0.00123701	-0.00241366	-0.00197271	-0.00208425	-0.00241165	-0.00237498	-0.00197747	-0.00196402
86798	-0.382549	-0.384719	-0.315266	-0.392348	-0.382361	-0.384583	-0.392361	-0.392413	-0.382645	-0.382051		86798	-0.213787	-0.212775	-0.30265	-0.199176	-0.213602	-0.212712	-0.199217	-0.199268	-0.213832	-0.213291		86798	-0.00200322	-0.00205458	-0.0127782	-0.00241376	-0.00199149	-0.00208472	-0.00241175	-0.00237504	-0.00199601	-0.00198292		86798	-0.00198428	-0.00205412	0.00123597	-0.00241366	-0.00197271	-0.00208425	-0.00241165	-0.00237498	-0.00197747	-0.00196402
86799	-0.38313	-0.385303	-0.31582	-0.392938	-0.382943	-0.385166	-0.392951	-0.393003	-0.383227	-0.382634		86799	-0.214129	-0.213119	-0.303226	-0.199507	-0.213945	-0.213056	-0.199547	-0.199598	-0.214175	-0.213634		86799	-0.00200329	-0.00205459	-0.012821	-0.00241376	-0.00199156	-0.00208472	-0.00241175	-0.00237504	-0.00199608	-0.00198299		86799	-0.00198428	-0.00205412	0.00123494	-0.00241366	-0.00197271	-0.00208425	-0.00241165	-0.00237498	-0.00197747	-0.00196402
86800	-0.383711	-0.385885	-0.316373	-0.393528	-0.383524	-0.385749	-0.393541	-0.393592	-0.383808	-0.383215		86800	-0.214471	-0.213462	-0.303802	-0.199837	-0.214288	-0.213399	-0.199877	-0.199928	-0.214517	-0.213977		86800	-0.00200336	-0.00205459	-0.0128637	-0.00241376	-0.00199163	-0.00208472	-0.00241175	-0.00237504	-0.00199615	-0.00198306		86800	-0.00198428	-0.00205412	0.0012339	-0.00241366	-0.00197271	-0.00208425	-0.00241165	-0.00237498	-0.00197747	-0.00196403
86801	-0.384291	-0.386467	-0.316926	-0.394116	-0.384104	-0.38633	-0.394129	-0.39418	-0.384387	-0.383795		86801	-0.214812	-0.213805	-0.304376	-0.200166	-0.214629	-0.213742	-0.200206	-0.200257	-0.214858	-0.214319		86801	-0.00200343	-0.00205459	-0.0129063	-0.00241376	-0.0019917	-0.00208472	-0.00241175	-0.00237505	-0.00199622	-0.00198313		86801	-0.00198428	-0.00205412	0.00123286	-0.00241366	-0.00197272	-0.00208425	-0.00241165	-0.00237498	-0.00197748	-0.00196403
86802	-0.384869	-0.387047	-0.317477	-0.394702	-0.384682	-0.38691	-0.394715	-0.394767	-0.384966	-0.384374		86802	-0.215152	-0.214146	-0.30495	-0.200494	-0.21497	-0.214083	-0.200535	-0.200586	-0.215198	-0.214661		86802	-0.0020035	-0.00205459	-0.012949	-0.00241376	-0.00199177	-0.00208473	-0.00241175	-0.00237505	-0.00199628	-0.0019832		86802	-0.00198428	-0.00205412	0.00123183	-0.00241366	-0.00197272	-0.00208425	-0.00241165	-0.00237498	-0.00197748	-0.00196403
86803	-0.385446	-0.387626	-0.318027	-0.395288	-0.38526	-0.387488	-0.395301	-0.395352	-0.385543	-0.384952		86803	-0.215492	-0.214487	-0.305522	-0.200822	-0.21531	-0.214424	-0.200863	-0.200914	-0.215538	-0.215001		86803	-0.00200357	-0.00205459	-0.0129916	-0.00241376	-0.00199184	-0.00208473	-0.00241175	-0.00237505	-0.00199635	-0.00198328		86803	-0.00198428	-0.00205412	0.00123079	-0.00241366	-0.00197272	-0.00208425	-0.00241165	-0.00237498	-0.00197748	-0.00196403
86804	-0.386021	-0.388203	-0.318577	-0.395872	-0.385836	-0.388066	-0.395885	-0.395936	-0.386118	-0.385529		86804	-0.21583	-0.214827	-0.306094	-0.201149	-0.215649	-0.214764	-0.20119	-0.201241	-0.215877	-0.215341		86804	-0.00200364	-0.0020546	-0.0130342	-0.00241376	-0.00199191	-0.00208473	-0.00241176	-0.00237505	-0.00199642	-0.00198335		86804	-0.00198429	-0.00205412	0.00122976	-0.00241366	-0.00197272	-0.00208425	-0.00241165	-0.00237498	-0.00197748	-0.00196403
86805	-0.386596	-0.38878	-0.319125	-0.396455	-0.386411	-0.388642	-0.396468	-0.396519	-0.386693	-0.386104		86805	-0.216168	-0.215166	-0.306664	-0.201476	-0.215987	-0.215103	-0.201516	-0.201567	-0.216214	-0.21568		86805	-0.00200371	-0.0020546	-0.0130767	-0.00241376	-0.00199198	-0.00208473	-0.00241176	-0.00237505	-0.00199649	-0.00198342		86805	-0.00198429	-0.00205412	0.00122872	-0.00241366	-0.00197272	-0.00208425	-0.00241165	-0.00237498	-0.00197748	-0.00196403
86806	-0.387169	-0.389355	-0.319673	-0.397037	-0.386984	-0.389217	-0.397049	-0.397101	-0.387266	-0.386678		86806	-0.216505	-0.215504	-0.307234	-0.201802	-0.216325	-0.215441	-0.201842	-0.201893	-0.216552	-0.216018		86806	-0.00200378	-0.0020546	-0.0131193	-0.00241376	-0.00199205	-0.00208473	-0.00241176	-0.00237505	-0.00199656	-0.00198349		86806	-0.00198429	-0.00205412	0.00122768	-0.00241366	-0.00197272	-0.00208425	-0.00241165	-0.00237498	-0.00197748	-0.00196403
86807	-0.387741	-0.389929	-0.320219	-0.397617	-0.387557	-0.389791	-0.39763	-0.397681	-0.387838	-0.387251		86807	-0.216841	-0.215842	-0.307802	-0.202127	-0.216661	-0.215779	-0.202167	-0.202218	-0.216888	-0.216355		86807	-0.00200385	-0.0020546	-0.0131618	-0.00241376	-0.00199212	-0.00208474	-0.00241176	-0.00237505	-0.00199663	-0.00198356		86807	-0.00198429	-0.00205412	0.00122665	-0.00241366	-0.00197272	-0.00208425	-0.00241165	-0.00237498	-0.00197748	-0.00196404
86808	-0.388312	-0.390501	-0.320764	-0.398197	-0.388128	-0.390363	-0.398209	-0.398261	-0.388409	-0.387823		86808	-0.217177	-0.216179	-0.308369	-0.202452	-0.216997	-0.216115	-0.202492	-0.202543	-0.217223	-0.216692		86808	-0.00200392	-0.0020546	-0.0132043	-0.00241377	-0.0019922	-0.00208474	-0.00241176	-0.00237505	-0.0019967	-0.00198363		86808	-0.00198429	-0.00205412	0.00122561	-0.00241366	-0.00197272	-0.00208425	-0.00241165	-0.00237498	-0.00197749	-0.00196404
86809	-0.388882	-0.391073	-0.321309	-0.398775	-0.388698	-0.390935	-0.398787	-0.398839	-0.388979	-0.388393		86809	-0.217511	-0.216515	-0.308935	-0.202776	-0.217333	-0.216451	-0.202816	-0.202867	-0.217558	-0.217027		86809	-0.00200399	-0.00205461	-0.0132468	-0.00241377	-0.00199227	-0.00208474	-0.00241176	-0.00237505	-0.00199677	-0.00198371		86809	-0.00198429	-0.00205412	0.00122458	-0.00241366	-0.00197273	-0.00208425	-0.00241165	-0.00237498	-0.00197749	-0.00196404
86810	-0.38945	-0.391643	-0.321853	-0.399352	-0.389267	-0.391505	-0.399364	-0.399415	-0.389547	-0.388962		86810	-0.217845	-0.21685	-0.3095	-0.203099	-0.217667	-0.216787	-0.203139	-0.20319	-0.217892	-0.217362		86810	-0.00200406	-0.00205461	-0.0132892	-0.00241377	-0.00199234	-0.00208474	-0.00241176	-0.00237505	-0.00199684	-0.00198378		86810	-0.00198429	-0.00205412	0.00122354	-0.00241366	-0.00197273	-0.00208425	-0.00241165	-0.00237498	-0.00197749	-0.00196404
[truncated: 3,190 more rows]
