# Supplementary material for: Computational modeling and quantitative physiology reveal central parameters for brassinosteroid-regulated early cell physiological processes linked to elongation growth of the Arabidopsis root
Source: eLife. 2022 Sep 7;11:e73031. doi: 10.7554/eLife.73031 (PMC9525061; doi:10.7554/eLife.73031)
Supplement: Figure 4—source data 1. [file elife-73031-fig4-data1.xlsx]

## Sheet: 4A
BL [nM]	Experimental Data	Err Experimental Data	Model Data	Err Model Data
0	5.58699	0.268829	--	--		Shown values of Fig. 4A
	--		5.4223	0.0227
0.1	5.28445	0.358896	--	--
	--		5.37126	0.00942
1	5.32518	0.343652	--	--
	--		5.23145	0.02665
5	5.05356	0.312103	--	--
	--		5.10704	0.05258
10	4.92215	0.226001	--	--
	--		5.07598	0.0087
50	5.06964	0.377541	--	--
	--		5.06009	0.0182
100	5.10514	0.33725	--	--
		--	5.04555	0.02072
Simulation results of 10 models (structurally identical but independent parameterizations). Numbers correspond to the number of the model (internal numbering)
Dose-Response behavior
		Modell #
	BL [nM]	3	6	14	23	34	38	40	45	47	50				mean	standard deviation
	0	5.43694	5.43116	5.35568	5.42505	5.43214	5.43776	5.42776	5.42512	5.4295	5.43649				5.4223	0.022696
	0.1	5.38236	5.3766	5.34998	5.36475	5.37753	5.38308	5.36746	5.36484	5.37523	5.38191				5.37126	0.00942125
	1	5.23587	5.22703	5.30446	5.20661	5.23104	5.23358	5.20931	5.20664	5.22889	5.23548				5.23145	0.0266463
	5	5.09953	5.09103	5.26166	5.07473	5.09465	5.09769	5.07746	5.07476	5.09235	5.09903				5.10704	0.052579
	10	5.08781	5.08092	5.06268	5.06645	5.08287	5.08755	5.06917	5.06647	5.08057	5.08718				5.07598	0.00869929
	50	5.06365	5.06157	5.00938	5.074	5.05855	5.06803	5.07653	5.07384	5.0562	5.06271				5.06009	0.0182042
	100	5.03822	5.03651	5.00824	5.07298	5.03314	5.04298	5.07533	5.07263	5.03082	5.03731				5.04555	0.0207167
Experimental Data
	20102020 1	20102020 2	29092020											Mock	01 BL	1 BL	5 BL	10 BL	50 BL	100 BL
mock 1														5.43635	5.37669	5.60353	5.18374	4.96556	4.57329	4.66877
1	5.43635	5.40679	6.13538											5.54964	5.1493	5.283	5.43635	5.37669	5.68124	5.07821
2	5.54964	5.65573	5.80702											5.5768	4.886	5.7311	5.31482	4.96556	5.31482	5.52203
3	5.5768	5.25057	5.13903											6.14268	5.25057	5.1493	4.75908	5.00396	5.07821	5.283
4	6.14268	5.60353	5.27901											5.21749	5.0415	4.80247	5.21749	5.0415	4.84476	5.31482
5	5.21749	5.84962	5.64213											5.40679	5.58179	5.46541	5.25057	4.57329	5.0415	4.66877
6		5.46541	5.78977											5.65573	5.16834	5.87234	5.11414	5.11414	4.36423	5.18374
			5.95221											5.25057	4.83753	5.25057	4.52343	4.886	5.43635	5.46541
			5.42816											5.60353	5.01415	4.92626	4.43579	5.283	4.886	5.07821
			5.40453											5.84962	5.84082	4.75908	5.27901	4.62171	5.52203	4.18823
			5.53984		3 measurements ; all pooled, then averaged									5.46541	5.98225	5.40453	4.75902	4.57329	5.0415	5.42816
			5.64213											6.13538		5.82404	5.40453	4.75902	4.92626	5.10899
					Error is Standart Deviation									5.80702		5.27901	4.87497	4.91128	5.7545	5.01415
01 nM BL 1														5.13903		5.22493	5.19697	4.75902	5.49639	5.19697
1	5.37669		5.58179											5.27901		4.94655		5.04659	4.98082	5.07819
2	5.1493		5.16834											5.64213		5.68075		4.71778	4.79891	5.40453
3	4.886		4.83753											5.78977				5.07819	4.83753
4	5.25057		5.01415											5.95221					4.67509
5	5.0415		5.84082											5.42816
			5.98225											5.40453
														5.53984
1 nM BL 1														5.64213
1	5.60353	5.46541	5.40453
2	5.283	5.87234	5.82404											5.58699	5.28445	5.32518	5.05356	4.92215	5.06964	5.10514
3	5.7311	5.25057	5.27901											0.268829	0.358896	0.343652	0.312103	0.226001	0.377541	0.33725
4	5.1493	4.92626	5.22493
5	4.80247	4.75908	4.94655											22	11	16	14	17	18	16
			5.68075
5 nM BL
1	5.18374	5.21749	4.43579
	5.43635	5.25057	5.27901
3		5.11414	4.75902
4	5.31482	4.52343	5.40453
5	4.75908		4.87497											Statistics for experimental Data of Fig. 4A
6			5.19697
														The data is normally distributed (tested by Shapiro-Wilk Test). Variances are equal (tested with Levene Test). ANOVA is allowed.
														Reveals significant differences between groups. Tukey-HSD Post hoc test, shown below point out in which groups the differences are present.
10 nM BL 1
1	4.96556	5.11414	4.75902
2	5.37669	4.886	4.91128
3	4.96556	5.283	4.75902
4	5.00396	4.62171	5.04659
5	5.0415	4.57329	4.71778																	Connecting Letters Report
	4.57329		5.07819
																				Level				Mean
50 nM BL 1																				Mock	A			5.58699
1	4.57329	4.36423	5.7545																	01 BL	A	B	C	5.28445
2	5.68124	5.43635	5.49639																	1 BL	A	B		5.32518
3	5.31482	4.886	4.98082																	5 BL		B	C	5.05356
4	5.07821	5.52203	4.79891																	10 BL			C	4.92215
5	4.84476	5.0415	4.83753																	50 BL		B	C	5.06964
6	5.0415	4.92626	4.67509																	100 BL		B	C	5.10514
																				Same letter means no significant difference (belong to one group).
100 nM BL 1
1	4.66877	5.18374	5.42816
2	5.07821	5.46541	5.10899
3	5.52203	5.07821	5.01415
4	5.283	4.18823	5.19697
5	5.31482		5.07819
6	4.66877		5.40453
																						Exact p-Values are reported here

## Sheet: 4B
Time [min]	Experimental Data	Err Experimental Data	Model Data	Err Model Data
10	-0.40295	0.133053	--	--		Shown values of Fig. 4B
	--		-0.27762	0.03843
20	-0.34871	0.179291	--	--
	--		-0.34534	0.01682
30	-0.34235	0.180425	--	--
	--		-0.35946	0.000858486
40	-0.19696	0.206219	--	--
	--		-0.36435	0.01054
50	-0.5927	0.238607	--	--
	--		-0.36002	0.01645
60	-0.21204	0.184542	--	--
			-0.34806	0.01943
Simulation results of 10 models (structurally identical but independent parameterizations). Numbers correspond to the number of the model (internal numbering)
Time-course
	Time [min]	3	6	14	23	34	38	40	45	47	50				mean	standard deviation
	10	-0.269309	-0.268655	-0.390625	-0.254342	-0.269215	-0.268585	-0.254368	-0.25442	-0.269373	-0.268996				-0.27762	0.0384265
	20	-0.342074	-0.342616	-0.39435	-0.334073	-0.342119	-0.342552	-0.334079	-0.334128	-0.342135	-0.342033				-0.345343	0.0168173
	30	-0.35961	-0.360939	-0.35854	-0.358593	-0.359697	-0.360886	-0.358591	-0.358637	-0.359622	-0.35965				-0.359462	0.000858486
	40	-0.366248	-0.367924	-0.333284	-0.370395	-0.366352	-0.367887	-0.37039	-0.370428	-0.366193	-0.36633				-0.364354	0.0105436
	50	-0.362737	-0.364356	-0.311861	-0.370439	-0.362853	-0.364338	-0.370434	-0.37046	-0.362609	-0.362859				-0.360023	0.0164485
	60	-0.351117	-0.352291	-0.291442	-0.361011	-0.351238	-0.352292	-0.36101	-0.361025	-0.350918	-0.35127				-0.348055	0.0194255
Experimental Data
										delta pH Early Elong
Early Elong	6102020	7102020	21102020							6102020	7102020	21102020
																					3 days of measurment with several replicates for mock and BL treatment
10 min BL	5.22874	5.89339	5.07468		10 min mock	5.47111	5.83197	5.71973													each day of measurement is averaged (e.g. B48)
	4.79666	6.02787	4.64199			5.21128	5.89339	5.6406
	5.21128	5.42856	5.13883			5.11873	5.63155	5.46448													Difference is calculated between mock and BL values (B48-G48) shown in K48
	5.4019	5.06322	4.81811			5.38742	5.40121	5.1997													These differences are averaged over the days (see N48); this value is shown in the manuscript
	4.99402	5.74608	4.73332			5.60743	6.09976	5.229
	5.24588		4.77647			5.74645	6.31271	5.39106													For the errors the standart deviation of each day is calculated (for both, mock and BL)
	4.94845																				Since it is mathematically not allowed to just substract SD's, the root must be drawn from the addition of the square roots of the individual SD's.
	4.34664													BL	mock	delta pH					The same is the case for the average of these (see e.g. N49).
														Mittelwert alles
MW	5.0217	5.63182	4.8639			5.42374	5.86176	5.44076		-0.402041	-0.229942	-0.57686	-0.402947	Standardfehler alles							Since the values are based on three different days of measurement, the calculated SD can be divided by root three (3 days of replicates) (see N50)
Stabw	0.335109	0.388249	0.198016			0.236479	0.324654	0.211539		0.125452	0.183932	0.0594973	0.230454	5.13243	5.57542	-0.442995					(=corrected SD)
Stabw ^2	0.112298	0.150738	0.0392104			0.0559226	0.1054	0.044749					0.133053	0.249548	0.186251	0.435799
20 min BL	4.76878	6.45863	5.10719		20 min mock	5.49742	6.55314	5.1997
	5.29548	6.26611	4.77647			5.73646	6.0821	5.41604
	5.44404	5.53338	4.97143			5.61889	6.00936	5.41604
	5.4302	5.67838	4.85834			5.34258	6.4019	4.85834
	5.03747	5.16296	4.77647			4.82374	6.29733	5.5558
	5.016	5.40121	5.229					5.00685
MW	5.16533	5.75011	4.95315			5.40382	6.26877	5.24213		-0.23849	-0.518655	-0.28898	-0.348708	5.28953	5.61348	-0.323951
Stabw	0.26858	0.507315	0.185244			0.355637	0.224471	0.269567		0.145602	0.262255	0.0803616	0.310541	0.275232	0.30786	0.583092
Stabw ^2	0.0721351	0.257369	0.0343154			0.126478	0.0503873	0.0726666					0.179291
30 min BL	5.24588	5.72384	5.16966		30 min mock	5.70583	5.78962	4.93492
	4.92481	5.81094	5.07468			5.61889	6.29733	5.16966
	5.09907	5.76801	5.00685			5.6414	6.56619	5.16966
	4.97151	5.02848	5.13883			5.32714	6.04616	5.71973
	4.67977	5.45544	5.04125			5.73646	5.22605	5.25759
	4.79666	5.53338	4.54305			5.53555	5.345	5.00685
	5.24588
	5.17536
	5.53555
	5.38742
	5.17536
	5.03747
MW	5.10623	5.55335	4.99572			5.59421	5.87839	5.20974		-0.487985	-0.325042	-0.214013	-0.342347	5.19038	5.56078	-0.370398
Stabw	0.242241	0.292222	0.229815			0.148523	0.528138	0.276508		0.06269	0.291709	0.0929249	0.312505	0.188023	0.251996	0.440019
Stabw ^2	0.0586807	0.0853934	0.0528148			0.0220592	0.27893	0.0764568					0.180425
40 min BL	5.19349	4.76069	5.16966		40 min mock	5.52301	5.53338	5.51102
	5.34258	5.87318	4.89725			5.22874	6.06423	4.81811
	5.22874	6.04616	4.54305			5.22874	6.32794	4.81811
	5.17536	5.40121	4.89725			5.31145	6.09976	5.25759
	4.90055	5.81094	5.44051			5.35777	5.95246	4.97143
		4.91934	4.93492				5.22605	4.68853
MW	5.16814	5.46859	4.98044			5.32994	5.86731	5.0108		-0.161799	-0.39872	-0.0303616	-0.19696	5.20793	5.40696	-0.199028
Stabw	0.163098	0.533259	0.301558			0.121323	0.408647	0.313302		0.0304017	0.329772	0.133808	0.357182	0.237566	0.274904	0.512469
Stabw ^2	0.0266008	0.284365	0.0909375			0.0147193	0.166992	0.0981584					0.206219
50 min BL	5.21128	5.60758	4.59356		50 min mock	5.63021	4.95658	4.97143
	5.19349	5.50784	4.54305			5.07898	6.29733	5.36554
	4.67977	5.67838	5.00685			5.68484	6.37274	5.1997
	4.99402	4.91934	4.37721			5.4019	6.52672	5.10719
	4.92481	4.95658	4.59356			5.4302	6.06423	4.97143
	4.67977	4.76069				4.82374	6.51334
MW	4.94719	5.2384	4.62285			5.34165	6.12183	5.12306		-0.394458	-0.883423	-0.500212	-0.592698	4.95458	5.55271	-0.598138
Stabw	0.235004	0.402966	0.232315			0.331586	0.59533	0.166512		0.12304	0.389846	0.0606756	0.41328	0.220691	0.340539	0.56123
Stabw ^2	0.0552267	0.162382	0.0539703			0.10995	0.354418	0.0277262					0.238607
60 min BL	5.24588	6.1345	4.97143		60 min mock	5.72636	5.63155	5.41604
	5.24588	5.50784	4.89725			5.41616	6.26611	5.10719
	5.26271	5.22605	5.16966			5.32714	5.65514	5.5558
	5.29548	4.99295	5.00685			5.27924	6.2818	5.36554
	5.03747	5.58324	5.13883			5.17536	5.48186	4.97143
	4.87564	5.74608	4.68853			5.29548	4.91934	4.97143
MW	5.16051	5.53178	4.97876			5.36996	5.70597	5.23124		-0.209448	-0.17419	-0.25248	-0.212039	5.22368	5.43572	-0.212039
Stabw	0.167049	0.399054	0.175377			0.191122	0.51429	0.248161		0.0459672	0.308733	0.068837	0.319636	0.200144	0.222642	0.422786
Stabw ^2	0.0279054	0.159244	0.030757			0.0365277	0.264494	0.0615837					0.184542
Statistics for experimental Data of Fig. 4B
A linear mixed effect model was performed; here: measurement time was used as fixed factor and day of measurment was used as random factor. In this model a Tukey HSD test revelead that there is no influence of the day of measurement. Due to this it would be allowed to pool the values.
However this not ideal, due to the fact, that delta values have to be calculated (see above). Therefore, we have decided to continue to treat the measurement days separately.
Data is normally distributed (tested with Shapiro-Wilk Test) and variances are equal (Levene Test). ANOVA is allowed. Reveals no significant differences between groups. Tukey-HSD Post hoc test, shown below, point out comparisions between all groups. The exact p-values are reported.
																					Exact p-Values are reported here

## Sheet: 4C
Cell wall thickness (in dm) in response to 10 nM BL. Shown are the results of 10 structurally identical models with independent parameterizations.
The models were stimulated at Time = 86400 s (=24h), which represents time = 0 min in Fig. 4C.
	Model #
Time [s]	3	6	14	23	34	38	40	45	47	50
86100	3.95e-06	3.95e-06	3.95e-06	3.95e-06	3.95e-06	3.95e-06	3.95e-06	3.95e-06	3.95e-06	3.95e-06
86101	3.95e-06	3.95e-06	3.95e-06	3.95e-06	3.95e-06	3.95e-06	3.95e-06	3.95e-06	3.95e-06	3.95e-06
86102	3.95e-06	3.95e-06	3.95e-06	3.95e-06	3.95e-06	3.95e-06	3.95e-06	3.95e-06	3.95e-06	3.95e-06
86103	3.95e-06	3.95e-06	3.95e-06	3.95e-06	3.95e-06	3.95e-06	3.95e-06	3.95e-06	3.95e-06	3.95e-06
86104	3.95e-06	3.95e-06	3.95e-06	3.95e-06	3.95e-06	3.95e-06	3.95e-06	3.95e-06	3.95e-06	3.95e-06
86105	3.95e-06	3.95e-06	3.95e-06	3.95e-06	3.95e-06	3.95e-06	3.95e-06	3.95e-06	3.95e-06	3.95e-06
86106	3.95e-06	3.95e-06	3.95e-06	3.95e-06	3.95e-06	3.95e-06	3.95e-06	3.95e-06	3.95e-06	3.95e-06
86107	3.95e-06	3.95e-06	3.95e-06	3.95e-06	3.95e-06	3.95e-06	3.95e-06	3.95e-06	3.95e-06	3.95e-06
86108	3.95e-06	3.95e-06	3.95e-06	3.95e-06	3.95e-06	3.95e-06	3.95e-06	3.95e-06	3.95e-06	3.95e-06
86109	3.95e-06	3.95e-06	3.95e-06	3.95e-06	3.95e-06	3.95e-06	3.95e-06	3.95e-06	3.95e-06	3.95e-06
86110	3.95e-06	3.95e-06	3.95e-06	3.95e-06	3.95e-06	3.95e-06	3.95e-06	3.95e-06	3.95e-06	3.95e-06
86111	3.95e-06	3.95e-06	3.95e-06	3.95e-06	3.95e-06	3.95e-06	3.95e-06	3.95e-06	3.95e-06	3.95e-06
86112	3.95e-06	3.95e-06	3.95e-06	3.95e-06	3.95e-06	3.95e-06	3.95e-06	3.95e-06	3.95e-06	3.95e-06
86113	3.95e-06	3.95e-06	3.95e-06	3.95e-06	3.95e-06	3.95e-06	3.95e-06	3.95e-06	3.95e-06	3.95e-06
86114	3.95e-06	3.95e-06	3.95e-06	3.95e-06	3.95e-06	3.95e-06	3.95e-06	3.95e-06	3.95e-06	3.95e-06
86115	3.95e-06	3.95e-06	3.95e-06	3.95e-06	3.95e-06	3.95e-06	3.95e-06	3.95e-06	3.95e-06	3.95e-06
86116	3.95e-06	3.95e-06	3.95e-06	3.95e-06	3.95e-06	3.95e-06	3.95e-06	3.95e-06	3.95e-06	3.95e-06
86117	3.95e-06	3.95e-06	3.95e-06	3.95e-06	3.95e-06	3.95e-06	3.95e-06	3.95e-06	3.95e-06	3.95e-06
86118	3.95e-06	3.95e-06	3.95e-06	3.95e-06	3.95e-06	3.95e-06	3.95e-06	3.95e-06	3.95e-06	3.95e-06
86119	3.95e-06	3.95e-06	3.95e-06	3.95e-06	3.95e-06	3.95e-06	3.95e-06	3.95e-06	3.95e-06	3.95e-06
86120	3.95e-06	3.95e-06	3.95e-06	3.95e-06	3.95e-06	3.95e-06	3.95e-06	3.95e-06	3.95e-06	3.95e-06
86121	3.95e-06	3.95e-06	3.95e-06	3.95e-06	3.95e-06	3.95e-06	3.95e-06	3.95e-06	3.95e-06	3.95e-06
86122	3.95e-06	3.95e-06	3.95e-06	3.95e-06	3.95e-06	3.95e-06	3.95e-06	3.95e-06	3.95e-06	3.95e-06
86123	3.95e-06	3.95e-06	3.95e-06	3.95e-06	3.95e-06	3.95e-06	3.95e-06	3.95e-06	3.95e-06	3.95e-06
86124	3.95e-06	3.95e-06	3.95e-06	3.95e-06	3.95e-06	3.95e-06	3.95e-06	3.95e-06	3.95e-06	3.95e-06
86125	3.95e-06	3.95e-06	3.95e-06	3.95e-06	3.95e-06	3.95e-06	3.95e-06	3.95e-06	3.95e-06	3.95e-06
86126	3.95e-06	3.95e-06	3.95e-06	3.95e-06	3.95e-06	3.95e-06	3.95e-06	3.95e-06	3.95e-06	3.95e-06
86127	3.95e-06	3.95e-06	3.95e-06	3.95e-06	3.95e-06	3.95e-06	3.95e-06	3.95e-06	3.95e-06	3.95e-06
86128	3.95e-06	3.95e-06	3.95e-06	3.95e-06	3.95e-06	3.95e-06	3.95e-06	3.95e-06	3.95e-06	3.95e-06
86129	3.95e-06	3.95e-06	3.95e-06	3.95e-06	3.95e-06	3.95e-06	3.95e-06	3.95e-06	3.95e-06	3.95e-06
86130	3.95e-06	3.95e-06	3.95e-06	3.95e-06	3.95e-06	3.95e-06	3.95e-06	3.95e-06	3.95e-06	3.95e-06
86131	3.95e-06	3.95e-06	3.95e-06	3.95e-06	3.95e-06	3.95e-06	3.95e-06	3.95e-06	3.95e-06	3.95e-06
86132	3.95e-06	3.95e-06	3.95e-06	3.95e-06	3.95e-06	3.95e-06	3.95e-06	3.95e-06	3.95e-06	3.95e-06
86133	3.95e-06	3.95e-06	3.95e-06	3.95e-06	3.95e-06	3.95e-06	3.95e-06	3.95e-06	3.95e-06	3.95e-06
86134	3.95e-06	3.95e-06	3.95e-06	3.95e-06	3.95e-06	3.95e-06	3.95e-06	3.95e-06	3.95e-06	3.95e-06
86135	3.95e-06	3.95e-06	3.95e-06	3.95e-06	3.95e-06	3.95e-06	3.95e-06	3.95e-06	3.95e-06	3.95e-06
86136	3.95e-06	3.95e-06	3.95e-06	3.95e-06	3.95e-06	3.95e-06	3.95e-06	3.95e-06	3.95e-06	3.95e-06
86137	3.95e-06	3.95e-06	3.95e-06	3.95e-06	3.95e-06	3.95e-06	3.95e-06	3.95e-06	3.95e-06	3.95e-06
86138	3.95e-06	3.95e-06	3.95e-06	3.95e-06	3.95e-06	3.95e-06	3.95e-06	3.95e-06	3.95e-06	3.95e-06
86139	3.95e-06	3.95e-06	3.95e-06	3.95e-06	3.95e-06	3.95e-06	3.95e-06	3.95e-06	3.95e-06	3.95e-06
86140	3.95e-06	3.95e-06	3.95e-06	3.95e-06	3.95e-06	3.95e-06	3.95e-06	3.95e-06	3.95e-06	3.95e-06
86141	3.95e-06	3.95e-06	3.95e-06	3.95e-06	3.95e-06	3.95e-06	3.95e-06	3.95e-06	3.95e-06	3.95e-06
86142	3.95e-06	3.95e-06	3.95e-06	3.95e-06	3.95e-06	3.95e-06	3.95e-06	3.95e-06	3.95e-06	3.95e-06
86143	3.95e-06	3.95e-06	3.95e-06	3.95e-06	3.95e-06	3.95e-06	3.95e-06	3.95e-06	3.95e-06	3.95e-06
86144	3.95e-06	3.95e-06	3.95e-06	3.95e-06	3.95e-06	3.95e-06	3.95e-06	3.95e-06	3.95e-06	3.95e-06
86145	3.95e-06	3.95e-06	3.95e-06	3.95e-06	3.95e-06	3.95e-06	3.95e-06	3.95e-06	3.95e-06	3.95e-06
86146	3.95e-06	3.95e-06	3.95e-06	3.95e-06	3.95e-06	3.95e-06	3.95e-06	3.95e-06	3.95e-06	3.95e-06
86147	3.95e-06	3.95e-06	3.95e-06	3.95e-06	3.95e-06	3.95e-06	3.95e-06	3.95e-06	3.95e-06	3.95e-06
86148	3.95e-06	3.95e-06	3.95e-06	3.95e-06	3.95e-06	3.95e-06	3.95e-06	3.95e-06	3.95e-06	3.95e-06
86149	3.95e-06	3.95e-06	3.95e-06	3.95e-06	3.95e-06	3.95e-06	3.95e-06	3.95e-06	3.95e-06	3.95e-06
86150	3.95e-06	3.95e-06	3.95e-06	3.95e-06	3.95e-06	3.95e-06	3.95e-06	3.95e-06	3.95e-06	3.95e-06
86151	3.95e-06	3.95e-06	3.95e-06	3.95e-06	3.95e-06	3.95e-06	3.95e-06	3.95e-06	3.95e-06	3.95e-06
86152	3.95e-06	3.95e-06	3.95e-06	3.95e-06	3.95e-06	3.95e-06	3.95e-06	3.95e-06	3.95e-06	3.95e-06
86153	3.95e-06	3.95e-06	3.95e-06	3.95e-06	3.95e-06	3.95e-06	3.95e-06	3.95e-06	3.95e-06	3.95e-06
86154	3.95e-06	3.95e-06	3.95e-06	3.95e-06	3.95e-06	3.95e-06	3.95e-06	3.95e-06	3.95e-06	3.95e-06
86155	3.95e-06	3.95e-06	3.95e-06	3.95e-06	3.95e-06	3.95e-06	3.95e-06	3.95e-06	3.95e-06	3.95e-06
86156	3.95e-06	3.95e-06	3.95e-06	3.95e-06	3.95e-06	3.95e-06	3.95e-06	3.95e-06	3.95e-06	3.95e-06
86157	3.95e-06	3.95e-06	3.95e-06	3.95e-06	3.95e-06	3.95e-06	3.95e-06	3.95e-06	3.95e-06	3.95e-06
86158	3.95e-06	3.95e-06	3.95e-06	3.95e-06	3.95e-06	3.95e-06	3.95e-06	3.95e-06	3.95e-06	3.95e-06
86159	3.95e-06	3.95e-06	3.95e-06	3.95e-06	3.95e-06	3.95e-06	3.95e-06	3.95e-06	3.95e-06	3.95e-06
86160	3.95e-06	3.95e-06	3.95e-06	3.95e-06	3.95e-06	3.95e-06	3.95e-06	3.95e-06	3.95e-06	3.95e-06
86161	3.95e-06	3.95e-06	3.95e-06	3.95e-06	3.95e-06	3.95e-06	3.95e-06	3.95e-06	3.95e-06	3.95e-06
86162	3.95e-06	3.95e-06	3.95e-06	3.95e-06	3.95e-06	3.95e-06	3.95e-06	3.95e-06	3.95e-06	3.95e-06
86163	3.95e-06	3.95e-06	3.95e-06	3.95e-06	3.95e-06	3.95e-06	3.95e-06	3.95e-06	3.95e-06	3.95e-06
86164	3.95e-06	3.95e-06	3.95e-06	3.95e-06	3.95e-06	3.95e-06	3.95e-06	3.95e-06	3.95e-06	3.95e-06
86165	3.95e-06	3.95e-06	3.95e-06	3.95e-06	3.95e-06	3.95e-06	3.95e-06	3.95e-06	3.95e-06	3.95e-06
86166	3.95e-06	3.95e-06	3.95e-06	3.95e-06	3.95e-06	3.95e-06	3.95e-06	3.95e-06	3.95e-06	3.95e-06
86167	3.95e-06	3.95e-06	3.95e-06	3.95e-06	3.95e-06	3.95e-06	3.95e-06	3.95e-06	3.95e-06	3.95e-06
86168	3.95e-06	3.95e-06	3.95e-06	3.95e-06	3.95e-06	3.95e-06	3.95e-06	3.95e-06	3.95e-06	3.95e-06
86169	3.95e-06	3.95e-06	3.95e-06	3.95e-06	3.95e-06	3.95e-06	3.95e-06	3.95e-06	3.95e-06	3.95e-06
86170	3.95e-06	3.95e-06	3.95e-06	3.95e-06	3.95e-06	3.95e-06	3.95e-06	3.95e-06	3.95e-06	3.95e-06
86171	3.95e-06	3.95e-06	3.95e-06	3.95e-06	3.95e-06	3.95e-06	3.95e-06	3.95e-06	3.95e-06	3.95e-06
86172	3.95e-06	3.95e-06	3.95e-06	3.95e-06	3.95e-06	3.95e-06	3.95e-06	3.95e-06	3.95e-06	3.95e-06
86173	3.95e-06	3.95e-06	3.95e-06	3.95e-06	3.95e-06	3.95e-06	3.95e-06	3.95e-06	3.95e-06	3.95e-06
86174	3.95e-06	3.95e-06	3.95e-06	3.95e-06	3.95e-06	3.95e-06	3.95e-06	3.95e-06	3.95e-06	3.95e-06
86175	3.95e-06	3.95e-06	3.95e-06	3.95e-06	3.95e-06	3.95e-06	3.95e-06	3.95e-06	3.95e-06	3.95e-06
86176	3.95e-06	3.95e-06	3.95e-06	3.95e-06	3.95e-06	3.95e-06	3.95e-06	3.95e-06	3.95e-06	3.95e-06
86177	3.95e-06	3.95e-06	3.95e-06	3.95e-06	3.95e-06	3.95e-06	3.95e-06	3.95e-06	3.95e-06	3.95e-06
86178	3.95e-06	3.95e-06	3.95e-06	3.95e-06	3.95e-06	3.95e-06	3.95e-06	3.95e-06	3.95e-06	3.95e-06
86179	3.95e-06	3.95e-06	3.95e-06	3.95e-06	3.95e-06	3.95e-06	3.95e-06	3.95e-06	3.95e-06	3.95e-06
86180	3.95e-06	3.95e-06	3.95e-06	3.95e-06	3.95e-06	3.95e-06	3.95e-06	3.95e-06	3.95e-06	3.95e-06
86181	3.95e-06	3.95e-06	3.95e-06	3.95e-06	3.95e-06	3.95e-06	3.95e-06	3.95e-06	3.95e-06	3.95e-06
86182	3.95e-06	3.95e-06	3.95e-06	3.95e-06	3.95e-06	3.95e-06	3.95e-06	3.95e-06	3.95e-06	3.95e-06
86183	3.95e-06	3.95e-06	3.95e-06	3.95e-06	3.95e-06	3.95e-06	3.95e-06	3.95e-06	3.95e-06	3.95e-06
86184	3.95e-06	3.95e-06	3.95e-06	3.95e-06	3.95e-06	3.95e-06	3.95e-06	3.95e-06	3.95e-06	3.95e-06
86185	3.95e-06	3.95e-06	3.95e-06	3.95e-06	3.95e-06	3.95e-06	3.95e-06	3.95e-06	3.95e-06	3.95e-06
86186	3.95e-06	3.95e-06	3.95e-06	3.95e-06	3.95e-06	3.95e-06	3.95e-06	3.95e-06	3.95e-06	3.95e-06
86187	3.95e-06	3.95e-06	3.95e-06	3.95e-06	3.95e-06	3.95e-06	3.95e-06	3.95e-06	3.95e-06	3.95e-06
86188	3.95e-06	3.95e-06	3.95e-06	3.95e-06	3.95e-06	3.95e-06	3.95e-06	3.95e-06	3.95e-06	3.95e-06
86189	3.95e-06	3.95e-06	3.95e-06	3.95e-06	3.95e-06	3.95e-06	3.95e-06	3.95e-06	3.95e-06	3.95e-06
86190	3.95e-06	3.95e-06	3.95e-06	3.95e-06	3.95e-06	3.95e-06	3.95e-06	3.95e-06	3.95e-06	3.95e-06
86191	3.95e-06	3.95e-06	3.95e-06	3.95e-06	3.95e-06	3.95e-06	3.95e-06	3.95e-06	3.95e-06	3.95e-06
86192	3.95e-06	3.95e-06	3.95e-06	3.95e-06	3.95e-06	3.95e-06	3.95e-06	3.95e-06	3.95e-06	3.95e-06
86193	3.95e-06	3.95e-06	3.95e-06	3.95e-06	3.95e-06	3.95e-06	3.95e-06	3.95e-06	3.95e-06	3.95e-06
86194	3.95e-06	3.95e-06	3.95e-06	3.95e-06	3.95e-06	3.95e-06	3.95e-06	3.95e-06	3.95e-06	3.95e-06
86195	3.95e-06	3.95e-06	3.95e-06	3.95e-06	3.95e-06	3.95e-06	3.95e-06	3.95e-06	3.95e-06	3.95e-06
86196	3.95e-06	3.95e-06	3.95e-06	3.95e-06	3.95e-06	3.95e-06	3.95e-06	3.95e-06	3.95e-06	3.95e-06
86197	3.95e-06	3.95e-06	3.95e-06	3.95e-06	3.95e-06	3.95e-06	3.95e-06	3.95e-06	3.95e-06	3.95e-06
86198	3.95e-06	3.95e-06	3.95e-06	3.95e-06	3.95e-06	3.95e-06	3.95e-06	3.95e-06	3.95e-06	3.95e-06
86199	3.95e-06	3.95e-06	3.95e-06	3.95e-06	3.95e-06	3.95e-06	3.95e-06	3.95e-06	3.95e-06	3.95e-06
86200	3.95e-06	3.95e-06	3.95e-06	3.95e-06	3.95e-06	3.95e-06	3.95e-06	3.95e-06	3.95e-06	3.95e-06
86201	3.95e-06	3.95e-06	3.95e-06	3.95e-06	3.95e-06	3.95e-06	3.95e-06	3.95e-06	3.95e-06	3.95e-06
86202	3.95e-06	3.95e-06	3.95e-06	3.95e-06	3.95e-06	3.95e-06	3.95e-06	3.95e-06	3.95e-06	3.95e-06
86203	3.95e-06	3.95e-06	3.95e-06	3.95e-06	3.95e-06	3.95e-06	3.95e-06	3.95e-06	3.95e-06	3.95e-06
86204	3.95e-06	3.95e-06	3.95e-06	3.95e-06	3.95e-06	3.95e-06	3.95e-06	3.95e-06	3.95e-06	3.95e-06
86205	3.95e-06	3.95e-06	3.95e-06	3.95e-06	3.95e-06	3.95e-06	3.95e-06	3.95e-06	3.95e-06	3.95e-06
86206	3.95e-06	3.95e-06	3.95e-06	3.95e-06	3.95e-06	3.95e-06	3.95e-06	3.95e-06	3.95e-06	3.95e-06
86207	3.95e-06	3.95e-06	3.95e-06	3.95e-06	3.95e-06	3.95e-06	3.95e-06	3.95e-06	3.95e-06	3.95e-06
86208	3.95e-06	3.95e-06	3.95e-06	3.95e-06	3.95e-06	3.95e-06	3.95e-06	3.95e-06	3.95e-06	3.95e-06
86209	3.95e-06	3.95e-06	3.95e-06	3.95e-06	3.95e-06	3.95e-06	3.95e-06	3.95e-06	3.95e-06	3.95e-06
86210	3.95e-06	3.95e-06	3.95e-06	3.95e-06	3.95e-06	3.95e-06	3.95e-06	3.95e-06	3.95e-06	3.95e-06
86211	3.95e-06	3.95e-06	3.95e-06	3.95e-06	3.95e-06	3.95e-06	3.95e-06	3.95e-06	3.95e-06	3.95e-06
86212	3.95e-06	3.95e-06	3.95e-06	3.95e-06	3.95e-06	3.95e-06	3.95e-06	3.95e-06	3.95e-06	3.95e-06
86213	3.95e-06	3.95e-06	3.95e-06	3.95e-06	3.95e-06	3.95e-06	3.95e-06	3.95e-06	3.95e-06	3.95e-06
86214	3.95e-06	3.95e-06	3.95e-06	3.95e-06	3.95e-06	3.95e-06	3.95e-06	3.95e-06	3.95e-06	3.95e-06
86215	3.95e-06	3.95e-06	3.95e-06	3.95e-06	3.95e-06	3.95e-06	3.95e-06	3.95e-06	3.95e-06	3.95e-06
86216	3.95e-06	3.95e-06	3.95e-06	3.95e-06	3.95e-06	3.95e-06	3.95e-06	3.95e-06	3.95e-06	3.95e-06
86217	3.95e-06	3.95e-06	3.95e-06	3.95e-06	3.95e-06	3.95e-06	3.95e-06	3.95e-06	3.95e-06	3.95e-06
86218	3.95e-06	3.95e-06	3.95e-06	3.95e-06	3.95e-06	3.95e-06	3.95e-06	3.95e-06	3.95e-06	3.95e-06
86219	3.95e-06	3.95e-06	3.95e-06	3.95e-06	3.95e-06	3.95e-06	3.95e-06	3.95e-06	3.95e-06	3.95e-06
86220	3.95e-06	3.95e-06	3.95e-06	3.95e-06	3.95e-06	3.95e-06	3.95e-06	3.95e-06	3.95e-06	3.95e-06
86221	3.95e-06	3.95e-06	3.95e-06	3.95e-06	3.95e-06	3.95e-06	3.95e-06	3.95e-06	3.95e-06	3.95e-06
86222	3.95e-06	3.95e-06	3.95e-06	3.95e-06	3.95e-06	3.95e-06	3.95e-06	3.95e-06	3.95e-06	3.95e-06
86223	3.95e-06	3.95e-06	3.95e-06	3.95e-06	3.95e-06	3.95e-06	3.95e-06	3.95e-06	3.95e-06	3.95e-06
86224	3.95e-06	3.95e-06	3.95e-06	3.95e-06	3.95e-06	3.95e-06	3.95e-06	3.95e-06	3.95e-06	3.95e-06
86225	3.95e-06	3.95e-06	3.95e-06	3.95e-06	3.95e-06	3.95e-06	3.95e-06	3.95e-06	3.95e-06	3.95e-06
86226	3.95e-06	3.95e-06	3.95e-06	3.95e-06	3.95e-06	3.95e-06	3.95e-06	3.95e-06	3.95e-06	3.95e-06
86227	3.95e-06	3.95e-06	3.95e-06	3.95e-06	3.95e-06	3.95e-06	3.95e-06	3.95e-06	3.95e-06	3.95e-06
86228	3.95e-06	3.95e-06	3.95e-06	3.95e-06	3.95e-06	3.95e-06	3.95e-06	3.95e-06	3.95e-06	3.95e-06
86229	3.95e-06	3.95e-06	3.95e-06	3.95e-06	3.95e-06	3.95e-06	3.95e-06	3.95e-06	3.95e-06	3.95e-06
86230	3.95e-06	3.95e-06	3.95e-06	3.95e-06	3.95e-06	3.95e-06	3.95e-06	3.95e-06	3.95e-06	3.95e-06
86231	3.95e-06	3.95e-06	3.95e-06	3.95e-06	3.95e-06	3.95e-06	3.95e-06	3.95e-06	3.95e-06	3.95e-06
86232	3.95e-06	3.95e-06	3.95e-06	3.95e-06	3.95e-06	3.95e-06	3.95e-06	3.95e-06	3.95e-06	3.95e-06
86233	3.95e-06	3.95e-06	3.95e-06	3.95e-06	3.95e-06	3.95e-06	3.95e-06	3.95e-06	3.95e-06	3.95e-06
86234	3.95e-06	3.95e-06	3.95e-06	3.95e-06	3.95e-06	3.95e-06	3.95e-06	3.95e-06	3.95e-06	3.95e-06
86235	3.95e-06	3.95e-06	3.95e-06	3.95e-06	3.95e-06	3.95e-06	3.95e-06	3.95e-06	3.95e-06	3.95e-06
86236	3.95e-06	3.95e-06	3.95e-06	3.95e-06	3.95e-06	3.95e-06	3.95e-06	3.95e-06	3.95e-06	3.95e-06
86237	3.95e-06	3.95e-06	3.95e-06	3.95e-06	3.95e-06	3.95e-06	3.95e-06	3.95e-06	3.95e-06	3.95e-06
86238	3.95e-06	3.95e-06	3.95e-06	3.95e-06	3.95e-06	3.95e-06	3.95e-06	3.95e-06	3.95e-06	3.95e-06
86239	3.95e-06	3.95e-06	3.95e-06	3.95e-06	3.95e-06	3.95e-06	3.95e-06	3.95e-06	3.95e-06	3.95e-06
86240	3.95e-06	3.95e-06	3.95e-06	3.95e-06	3.95e-06	3.95e-06	3.95e-06	3.95e-06	3.95e-06	3.95e-06
86241	3.95e-06	3.95e-06	3.95e-06	3.95e-06	3.95e-06	3.95e-06	3.95e-06	3.95e-06	3.95e-06	3.95e-06
86242	3.95e-06	3.95e-06	3.95e-06	3.95e-06	3.95e-06	3.95e-06	3.95e-06	3.95e-06	3.95e-06	3.95e-06
86243	3.95e-06	3.95e-06	3.95e-06	3.95e-06	3.95e-06	3.95e-06	3.95e-06	3.95e-06	3.95e-06	3.95e-06
86244	3.95e-06	3.95e-06	3.95e-06	3.95e-06	3.95e-06	3.95e-06	3.95e-06	3.95e-06	3.95e-06	3.95e-06
86245	3.95e-06	3.95e-06	3.95e-06	3.95e-06	3.95e-06	3.95e-06	3.95e-06	3.95e-06	3.95e-06	3.95e-06
86246	3.95e-06	3.95e-06	3.95e-06	3.95e-06	3.95e-06	3.95e-06	3.95e-06	3.95e-06	3.95e-06	3.95e-06
86247	3.95e-06	3.95e-06	3.95e-06	3.95e-06	3.95e-06	3.95e-06	3.95e-06	3.95e-06	3.95e-06	3.95e-06
86248	3.95e-06	3.95e-06	3.95e-06	3.95e-06	3.95e-06	3.95e-06	3.95e-06	3.95e-06	3.95e-06	3.95e-06
86249	3.95e-06	3.95e-06	3.95e-06	3.95e-06	3.95e-06	3.95e-06	3.95e-06	3.95e-06	3.95e-06	3.95e-06
86250	3.95e-06	3.95e-06	3.95e-06	3.95e-06	3.95e-06	3.95e-06	3.95e-06	3.95e-06	3.95e-06	3.95e-06
86251	3.95e-06	3.95e-06	3.95e-06	3.95e-06	3.95e-06	3.95e-06	3.95e-06	3.95e-06	3.95e-06	3.95e-06
86252	3.95e-06	3.95e-06	3.95e-06	3.95e-06	3.95e-06	3.95e-06	3.95e-06	3.95e-06	3.95e-06	3.95e-06
86253	3.95e-06	3.95e-06	3.95e-06	3.95e-06	3.95e-06	3.95e-06	3.95e-06	3.95e-06	3.95e-06	3.95e-06
86254	3.95e-06	3.95e-06	3.95e-06	3.95e-06	3.95e-06	3.95e-06	3.95e-06	3.95e-06	3.95e-06	3.95e-06
86255	3.95e-06	3.95e-06	3.95e-06	3.95e-06	3.95e-06	3.95e-06	3.95e-06	3.95e-06	3.95e-06	3.95e-06
86256	3.95e-06	3.95e-06	3.95e-06	3.95e-06	3.95e-06	3.95e-06	3.95e-06	3.95e-06	3.95e-06	3.95e-06
86257	3.95e-06	3.95e-06	3.95e-06	3.95e-06	3.95e-06	3.95e-06	3.95e-06	3.95e-06	3.95e-06	3.95e-06
86258	3.95e-06	3.95e-06	3.95e-06	3.95e-06	3.95e-06	3.95e-06	3.95e-06	3.95e-06	3.95e-06	3.95e-06
86259	3.95e-06	3.95e-06	3.95e-06	3.95e-06	3.95e-06	3.95e-06	3.95e-06	3.95e-06	3.95e-06	3.95e-06
86260	3.95e-06	3.95e-06	3.95e-06	3.95e-06	3.95e-06	3.95e-06	3.95e-06	3.95e-06	3.95e-06	3.95e-06
86261	3.95e-06	3.95e-06	3.95e-06	3.95e-06	3.95e-06	3.95e-06	3.95e-06	3.95e-06	3.95e-06	3.95e-06
86262	3.95e-06	3.95e-06	3.95e-06	3.95e-06	3.95e-06	3.95e-06	3.95e-06	3.95e-06	3.95e-06	3.95e-06
86263	3.95e-06	3.95e-06	3.95e-06	3.95e-06	3.95e-06	3.95e-06	3.95e-06	3.95e-06	3.95e-06	3.95e-06
86264	3.95e-06	3.95e-06	3.95e-06	3.95e-06	3.95e-06	3.95e-06	3.95e-06	3.95e-06	3.95e-06	3.95e-06
86265	3.95e-06	3.95e-06	3.95e-06	3.95e-06	3.95e-06	3.95e-06	3.95e-06	3.95e-06	3.95e-06	3.95e-06
86266	3.95e-06	3.95e-06	3.95e-06	3.95e-06	3.95e-06	3.95e-06	3.95e-06	3.95e-06	3.95e-06	3.95e-06
86267	3.95e-06	3.95e-06	3.95e-06	3.95e-06	3.95e-06	3.95e-06	3.95e-06	3.95e-06	3.95e-06	3.95e-06
86268	3.95e-06	3.95e-06	3.95e-06	3.95e-06	3.95e-06	3.95e-06	3.95e-06	3.95e-06	3.95e-06	3.95e-06
86269	3.95e-06	3.95e-06	3.95e-06	3.95e-06	3.95e-06	3.95e-06	3.95e-06	3.95e-06	3.95e-06	3.95e-06
86270	3.95e-06	3.95e-06	3.95e-06	3.95e-06	3.95e-06	3.95e-06	3.95e-06	3.95e-06	3.95e-06	3.95e-06
86271	3.95e-06	3.95e-06	3.95e-06	3.95e-06	3.95e-06	3.95e-06	3.95e-06	3.95e-06	3.95e-06	3.95e-06
86272	3.95e-06	3.95e-06	3.95e-06	3.95e-06	3.95e-06	3.95e-06	3.95e-06	3.95e-06	3.95e-06	3.95e-06
86273	3.95e-06	3.95e-06	3.95e-06	3.95e-06	3.95e-06	3.95e-06	3.95e-06	3.95e-06	3.95e-06	3.95e-06
86274	3.95e-06	3.95e-06	3.95e-06	3.95e-06	3.95e-06	3.95e-06	3.95e-06	3.95e-06	3.95e-06	3.95e-06
86275	3.95e-06	3.95e-06	3.95e-06	3.95e-06	3.95e-06	3.95e-06	3.95e-06	3.95e-06	3.95e-06	3.95e-06
86276	3.95e-06	3.95e-06	3.95e-06	3.95e-06	3.95e-06	3.95e-06	3.95e-06	3.95e-06	3.95e-06	3.95e-06
86277	3.95e-06	3.95e-06	3.95e-06	3.95e-06	3.95e-06	3.95e-06	3.95e-06	3.95e-06	3.95e-06	3.95e-06
86278	3.95e-06	3.95e-06	3.95e-06	3.95e-06	3.95e-06	3.95e-06	3.95e-06	3.95e-06	3.95e-06	3.95e-06
86279	3.95e-06	3.95e-06	3.95e-06	3.95e-06	3.95e-06	3.95e-06	3.95e-06	3.95e-06	3.95e-06	3.95e-06
86280	3.95e-06	3.95e-06	3.95e-06	3.95e-06	3.95e-06	3.95e-06	3.95e-06	3.95e-06	3.95e-06	3.95e-06
86281	3.95e-06	3.95e-06	3.95e-06	3.95e-06	3.95e-06	3.95e-06	3.95e-06	3.95e-06	3.95e-06	3.95e-06
86282	3.95e-06	3.95e-06	3.95e-06	3.95e-06	3.95e-06	3.95e-06	3.95e-06	3.95e-06	3.95e-06	3.95e-06
86283	3.95e-06	3.95e-06	3.95e-06	3.95e-06	3.95e-06	3.95e-06	3.95e-06	3.95e-06	3.95e-06	3.95e-06
86284	3.95e-06	3.95e-06	3.95e-06	3.95e-06	3.95e-06	3.95e-06	3.95e-06	3.95e-06	3.95e-06	3.95e-06
86285	3.95e-06	3.95e-06	3.95e-06	3.95e-06	3.95e-06	3.95e-06	3.95e-06	3.95e-06	3.95e-06	3.95e-06
86286	3.95e-06	3.95e-06	3.95e-06	3.95e-06	3.95e-06	3.95e-06	3.95e-06	3.95e-06	3.95e-06	3.95e-06
86287	3.95e-06	3.95e-06	3.95e-06	3.95e-06	3.95e-06	3.95e-06	3.95e-06	3.95e-06	3.95e-06	3.95e-06
86288	3.95e-06	3.95e-06	3.95e-06	3.95e-06	3.95e-06	3.95e-06	3.95e-06	3.95e-06	3.95e-06	3.95e-06
86289	3.95e-06	3.95e-06	3.95e-06	3.95e-06	3.95e-06	3.95e-06	3.95e-06	3.95e-06	3.95e-06	3.95e-06
86290	3.95e-06	3.95e-06	3.95e-06	3.95e-06	3.95e-06	3.95e-06	3.95e-06	3.95e-06	3.95e-06	3.95e-06
86291	3.95e-06	3.95e-06	3.95e-06	3.95e-06	3.95e-06	3.95e-06	3.95e-06	3.95e-06	3.95e-06	3.95e-06
86292	3.95e-06	3.95e-06	3.95e-06	3.95e-06	3.95e-06	3.95e-06	3.95e-06	3.95e-06	3.95e-06	3.95e-06
86293	3.95e-06	3.95e-06	3.95e-06	3.95e-06	3.95e-06	3.95e-06	3.95e-06	3.95e-06	3.95e-06	3.95e-06
86294	3.95e-06	3.95e-06	3.95e-06	3.95e-06	3.95e-06	3.95e-06	3.95e-06	3.95e-06	3.95e-06	3.95e-06
86295	3.95e-06	3.95e-06	3.95e-06	3.95e-06	3.95e-06	3.95e-06	3.95e-06	3.95e-06	3.95e-06	3.95e-06
86296	3.95e-06	3.95e-06	3.95e-06	3.95e-06	3.95e-06	3.95e-06	3.95e-06	3.95e-06	3.95e-06	3.95e-06
86297	3.95e-06	3.95e-06	3.95e-06	3.95e-06	3.95e-06	3.95e-06	3.95e-06	3.95e-06	3.95e-06	3.95e-06
86298	3.95e-06	3.95e-06	3.95e-06	3.95e-06	3.95e-06	3.95e-06	3.95e-06	3.95e-06	3.95e-06	3.95e-06
86299	3.95e-06	3.95e-06	3.95e-06	3.95e-06	3.95e-06	3.95e-06	3.95e-06	3.95e-06	3.95e-06	3.95e-06
86300	3.95e-06	3.95e-06	3.95e-06	3.95e-06	3.95e-06	3.95e-06	3.95e-06	3.95e-06	3.95e-06	3.95e-06
86301	3.95e-06	3.95e-06	3.95e-06	3.95e-06	3.95e-06	3.95e-06	3.95e-06	3.95e-06	3.95e-06	3.95e-06
86302	3.95e-06	3.95e-06	3.95e-06	3.95e-06	3.95e-06	3.95e-06	3.95e-06	3.95e-06	3.95e-06	3.95e-06
86303	3.95e-06	3.95e-06	3.95e-06	3.95e-06	3.95e-06	3.95e-06	3.95e-06	3.95e-06	3.95e-06	3.95e-06
86304	3.95e-06	3.95e-06	3.95e-06	3.95e-06	3.95e-06	3.95e-06	3.95e-06	3.95e-06	3.95e-06	3.95e-06
86305	3.95e-06	3.95e-06	3.95e-06	3.95e-06	3.95e-06	3.95e-06	3.95e-06	3.95e-06	3.95e-06	3.95e-06
86306	3.95e-06	3.95e-06	3.95e-06	3.95e-06	3.95e-06	3.95e-06	3.95e-06	3.95e-06	3.95e-06	3.95e-06
86307	3.95e-06	3.95e-06	3.95e-06	3.95e-06	3.95e-06	3.95e-06	3.95e-06	3.95e-06	3.95e-06	3.95e-06
86308	3.95e-06	3.95e-06	3.95e-06	3.95e-06	3.95e-06	3.95e-06	3.95e-06	3.95e-06	3.95e-06	3.95e-06
86309	3.95e-06	3.95e-06	3.95e-06	3.95e-06	3.95e-06	3.95e-06	3.95e-06	3.95e-06	3.95e-06	3.95e-06
86310	3.95e-06	3.95e-06	3.95e-06	3.95e-06	3.95e-06	3.95e-06	3.95e-06	3.95e-06	3.95e-06	3.95e-06
86311	3.95e-06	3.95e-06	3.95e-06	3.95e-06	3.95e-06	3.95e-06	3.95e-06	3.95e-06	3.95e-06	3.95e-06
86312	3.95e-06	3.95e-06	3.95e-06	3.95e-06	3.95e-06	3.95e-06	3.95e-06	3.95e-06	3.95e-06	3.95e-06
86313	3.95e-06	3.95e-06	3.95e-06	3.95e-06	3.95e-06	3.95e-06	3.95e-06	3.95e-06	3.95e-06	3.95e-06
86314	3.95e-06	3.95e-06	3.95e-06	3.95e-06	3.95e-06	3.95e-06	3.95e-06	3.95e-06	3.95e-06	3.95e-06
86315	3.95e-06	3.95e-06	3.95e-06	3.95e-06	3.95e-06	3.95e-06	3.95e-06	3.95e-06	3.95e-06	3.95e-06
86316	3.95e-06	3.95e-06	3.95e-06	3.95e-06	3.95e-06	3.95e-06	3.95e-06	3.95e-06	3.95e-06	3.95e-06
86317	3.95e-06	3.95e-06	3.95e-06	3.95e-06	3.95e-06	3.95e-06	3.95e-06	3.95e-06	3.95e-06	3.95e-06
86318	3.95e-06	3.95e-06	3.95e-06	3.95e-06	3.95e-06	3.95e-06	3.95e-06	3.95e-06	3.95e-06	3.95e-06
86319	3.95e-06	3.95e-06	3.95e-06	3.95e-06	3.95e-06	3.95e-06	3.95e-06	3.95e-06	3.95e-06	3.95e-06
86320	3.95e-06	3.95e-06	3.95e-06	3.95e-06	3.95e-06	3.95e-06	3.95e-06	3.95e-06	3.95e-06	3.95e-06
86321	3.95e-06	3.95e-06	3.95e-06	3.95e-06	3.95e-06	3.95e-06	3.95e-06	3.95e-06	3.95e-06	3.95e-06
86322	3.95e-06	3.95e-06	3.95e-06	3.95e-06	3.95e-06	3.95e-06	3.95e-06	3.95e-06	3.95e-06	3.95e-06
86323	3.95e-06	3.95e-06	3.95e-06	3.95e-06	3.95e-06	3.95e-06	3.95e-06	3.95e-06	3.95e-06	3.95e-06
86324	3.95e-06	3.95e-06	3.95e-06	3.95e-06	3.95e-06	3.95e-06	3.95e-06	3.95e-06	3.95e-06	3.95e-06
86325	3.95e-06	3.95e-06	3.95e-06	3.95e-06	3.95e-06	3.95e-06	3.95e-06	3.95e-06	3.95e-06	3.95e-06
86326	3.95e-06	3.95e-06	3.95e-06	3.95e-06	3.95e-06	3.95e-06	3.95e-06	3.95e-06	3.95e-06	3.95e-06
86327	3.95e-06	3.95e-06	3.95e-06	3.95e-06	3.95e-06	3.95e-06	3.95e-06	3.95e-06	3.95e-06	3.95e-06
86328	3.95e-06	3.95e-06	3.95e-06	3.95e-06	3.95e-06	3.95e-06	3.95e-06	3.95e-06	3.95e-06	3.95e-06
86329	3.95e-06	3.95e-06	3.95e-06	3.95e-06	3.95e-06	3.95e-06	3.95e-06	3.95e-06	3.95e-06	3.95e-06
86330	3.95e-06	3.95e-06	3.95e-06	3.95e-06	3.95e-06	3.95e-06	3.95e-06	3.95e-06	3.95e-06	3.95e-06
86331	3.95e-06	3.95e-06	3.95e-06	3.95e-06	3.95e-06	3.95e-06	3.95e-06	3.95e-06	3.95e-06	3.95e-06
86332	3.95e-06	3.95e-06	3.95e-06	3.95e-06	3.95e-06	3.95e-06	3.95e-06	3.95e-06	3.95e-06	3.95e-06
86333	3.95e-06	3.95e-06	3.95e-06	3.95e-06	3.95e-06	3.95e-06	3.95e-06	3.95e-06	3.95e-06	3.95e-06
86334	3.95e-06	3.95e-06	3.95e-06	3.95e-06	3.95e-06	3.95e-06	3.95e-06	3.95e-06	3.95e-06	3.95e-06
86335	3.95e-06	3.95e-06	3.95e-06	3.95e-06	3.95e-06	3.95e-06	3.95e-06	3.95e-06	3.95e-06	3.95e-06
86336	3.95e-06	3.95e-06	3.95e-06	3.95e-06	3.95e-06	3.95e-06	3.95e-06	3.95e-06	3.95e-06	3.95e-06
86337	3.95e-06	3.95e-06	3.95e-06	3.95e-06	3.95e-06	3.95e-06	3.95e-06	3.95e-06	3.95e-06	3.95e-06
86338	3.95e-06	3.95e-06	3.95e-06	3.95e-06	3.95e-06	3.95e-06	3.95e-06	3.95e-06	3.95e-06	3.95e-06
86339	3.95e-06	3.95e-06	3.95e-06	3.95e-06	3.95e-06	3.95e-06	3.95e-06	3.95e-06	3.95e-06	3.95e-06
86340	3.95e-06	3.95e-06	3.95e-06	3.95e-06	3.95e-06	3.95e-06	3.95e-06	3.95e-06	3.95e-06	3.95e-06
86341	3.95e-06	3.95e-06	3.95e-06	3.95e-06	3.95e-06	3.95e-06	3.95e-06	3.95e-06	3.95e-06	3.95e-06
86342	3.95e-06	3.95e-06	3.95e-06	3.95e-06	3.95e-06	3.95e-06	3.95e-06	3.95e-06	3.95e-06	3.95e-06
86343	3.95e-06	3.95e-06	3.95e-06	3.95e-06	3.95e-06	3.95e-06	3.95e-06	3.95e-06	3.95e-06	3.95e-06
86344	3.95e-06	3.95e-06	3.95e-06	3.95e-06	3.95e-06	3.95e-06	3.95e-06	3.95e-06	3.95e-06	3.95e-06
86345	3.95e-06	3.95e-06	3.95e-06	3.95e-06	3.95e-06	3.95e-06	3.95e-06	3.95e-06	3.95e-06	3.95e-06
86346	3.95e-06	3.95e-06	3.95e-06	3.95e-06	3.95e-06	3.95e-06	3.95e-06	3.95e-06	3.95e-06	3.95e-06
86347	3.95e-06	3.95e-06	3.95e-06	3.95e-06	3.95e-06	3.95e-06	3.95e-06	3.95e-06	3.95e-06	3.95e-06
86348	3.95e-06	3.95e-06	3.95e-06	3.95e-06	3.95e-06	3.95e-06	3.95e-06	3.95e-06	3.95e-06	3.95e-06
86349	3.95e-06	3.95e-06	3.95e-06	3.95e-06	3.95e-06	3.95e-06	3.95e-06	3.95e-06	3.95e-06	3.95e-06
86350	3.95e-06	3.95e-06	3.95e-06	3.95e-06	3.95e-06	3.95e-06	3.95e-06	3.95e-06	3.95e-06	3.95e-06
86351	3.95e-06	3.95e-06	3.95e-06	3.95e-06	3.95e-06	3.95e-06	3.95e-06	3.95e-06	3.95e-06	3.95e-06
86352	3.95e-06	3.95e-06	3.95e-06	3.95e-06	3.95e-06	3.95e-06	3.95e-06	3.95e-06	3.95e-06	3.95e-06
86353	3.95e-06	3.95e-06	3.95e-06	3.95e-06	3.95e-06	3.95e-06	3.95e-06	3.95e-06	3.95e-06	3.95e-06
86354	3.95e-06	3.95e-06	3.95e-06	3.95e-06	3.95e-06	3.95e-06	3.95e-06	3.95e-06	3.95e-06	3.95e-06
86355	3.95e-06	3.95e-06	3.95e-06	3.95e-06	3.95e-06	3.95e-06	3.95e-06	3.95e-06	3.95e-06	3.95e-06
86356	3.95e-06	3.95e-06	3.95e-06	3.95e-06	3.95e-06	3.95e-06	3.95e-06	3.95e-06	3.95e-06	3.95e-06
86357	3.95e-06	3.95e-06	3.95e-06	3.95e-06	3.95e-06	3.95e-06	3.95e-06	3.95e-06	3.95e-06	3.95e-06
86358	3.95e-06	3.95e-06	3.95e-06	3.95e-06	3.95e-06	3.95e-06	3.95e-06	3.95e-06	3.95e-06	3.95e-06
86359	3.95e-06	3.95e-06	3.95e-06	3.95e-06	3.95e-06	3.95e-06	3.95e-06	3.95e-06	3.95e-06	3.95e-06
86360	3.95e-06	3.95e-06	3.95e-06	3.95e-06	3.95e-06	3.95e-06	3.95e-06	3.95e-06	3.95e-06	3.95e-06
86361	3.95e-06	3.95e-06	3.95e-06	3.95e-06	3.95e-06	3.95e-06	3.95e-06	3.95e-06	3.95e-06	3.95e-06
86362	3.95e-06	3.95e-06	3.95e-06	3.95e-06	3.95e-06	3.95e-06	3.95e-06	3.95e-06	3.95e-06	3.95e-06
86363	3.95e-06	3.95e-06	3.95e-06	3.95e-06	3.95e-06	3.95e-06	3.95e-06	3.95e-06	3.95e-06	3.95e-06
86364	3.95e-06	3.95e-06	3.95e-06	3.95e-06	3.95e-06	3.95e-06	3.95e-06	3.95e-06	3.95e-06	3.95e-06
86365	3.95e-06	3.95e-06	3.95e-06	3.95e-06	3.95e-06	3.95e-06	3.95e-06	3.95e-06	3.95e-06	3.95e-06
86366	3.95e-06	3.95e-06	3.95e-06	3.95e-06	3.95e-06	3.95e-06	3.95e-06	3.95e-06	3.95e-06	3.95e-06
86367	3.95e-06	3.95e-06	3.95e-06	3.95e-06	3.95e-06	3.95e-06	3.95e-06	3.95e-06	3.95e-06	3.95e-06
86368	3.95e-06	3.95e-06	3.95e-06	3.95e-06	3.95e-06	3.95e-06	3.95e-06	3.95e-06	3.95e-06	3.95e-06
86369	3.95e-06	3.95e-06	3.95e-06	3.95e-06	3.95e-06	3.95e-06	3.95e-06	3.95e-06	3.95e-06	3.95e-06
86370	3.95e-06	3.95e-06	3.95e-06	3.95e-06	3.95e-06	3.95e-06	3.95e-06	3.95e-06	3.95e-06	3.95e-06
86371	3.95e-06	3.95e-06	3.95e-06	3.95e-06	3.95e-06	3.95e-06	3.95e-06	3.95e-06	3.95e-06	3.95e-06
86372	3.95e-06	3.95e-06	3.95e-06	3.95e-06	3.95e-06	3.95e-06	3.95e-06	3.95e-06	3.95e-06	3.95e-06
86373	3.95e-06	3.95e-06	3.95e-06	3.95e-06	3.95e-06	3.95e-06	3.95e-06	3.95e-06	3.95e-06	3.95e-06
86374	3.95e-06	3.95e-06	3.95e-06	3.95e-06	3.95e-06	3.95e-06	3.95e-06	3.95e-06	3.95e-06	3.95e-06
86375	3.95e-06	3.95e-06	3.95e-06	3.95e-06	3.95e-06	3.95e-06	3.95e-06	3.95e-06	3.95e-06	3.95e-06
86376	3.95e-06	3.95e-06	3.95e-06	3.95e-06	3.95e-06	3.95e-06	3.95e-06	3.95e-06	3.95e-06	3.95e-06
86377	3.95e-06	3.95e-06	3.95e-06	3.95e-06	3.95e-06	3.95e-06	3.95e-06	3.95e-06	3.95e-06	3.95e-06
86378	3.95e-06	3.95e-06	3.95e-06	3.95e-06	3.95e-06	3.95e-06	3.95e-06	3.95e-06	3.95e-06	3.95e-06
86379	3.95e-06	3.95e-06	3.95e-06	3.95e-06	3.95e-06	3.95e-06	3.95e-06	3.95e-06	3.95e-06	3.95e-06
86380	3.95e-06	3.95e-06	3.95e-06	3.95e-06	3.95e-06	3.95e-06	3.95e-06	3.95e-06	3.95e-06	3.95e-06
86381	3.95e-06	3.95e-06	3.95e-06	3.95e-06	3.95e-06	3.95e-06	3.95e-06	3.95e-06	3.95e-06	3.95e-06
86382	3.95e-06	3.95e-06	3.95e-06	3.95e-06	3.95e-06	3.95e-06	3.95e-06	3.95e-06	3.95e-06	3.95e-06
86383	3.95e-06	3.95e-06	3.95e-06	3.95e-06	3.95e-06	3.95e-06	3.95e-06	3.95e-06	3.95e-06	3.95e-06
86384	3.95e-06	3.95e-06	3.95e-06	3.95e-06	3.95e-06	3.95e-06	3.95e-06	3.95e-06	3.95e-06	3.95e-06
86385	3.95e-06	3.95e-06	3.95e-06	3.95e-06	3.95e-06	3.95e-06	3.95e-06	3.95e-06	3.95e-06	3.95e-06
86386	3.95e-06	3.95e-06	3.95e-06	3.95e-06	3.95e-06	3.95e-06	3.95e-06	3.95e-06	3.95e-06	3.95e-06
86387	3.95e-06	3.95e-06	3.95e-06	3.95e-06	3.95e-06	3.95e-06	3.95e-06	3.95e-06	3.95e-06	3.95e-06
86388	3.95e-06	3.95e-06	3.95e-06	3.95e-06	3.95e-06	3.95e-06	3.95e-06	3.95e-06	3.95e-06	3.95e-06
86389	3.95e-06	3.95e-06	3.95e-06	3.95e-06	3.95e-06	3.95e-06	3.95e-06	3.95e-06	3.95e-06	3.95e-06
86390	3.95e-06	3.95e-06	3.95e-06	3.95e-06	3.95e-06	3.95e-06	3.95e-06	3.95e-06	3.95e-06	3.95e-06
86391	3.95e-06	3.95e-06	3.95e-06	3.95e-06	3.95e-06	3.95e-06	3.95e-06	3.95e-06	3.95e-06	3.95e-06
86392	3.95e-06	3.95e-06	3.95e-06	3.95e-06	3.95e-06	3.95e-06	3.95e-06	3.95e-06	3.95e-06	3.95e-06
86393	3.95e-06	3.95e-06	3.95e-06	3.95e-06	3.95e-06	3.95e-06	3.95e-06	3.95e-06	3.95e-06	3.95e-06
86394	3.95e-06	3.95e-06	3.95e-06	3.95e-06	3.95e-06	3.95e-06	3.95e-06	3.95e-06	3.95e-06	3.95e-06
86395	3.95e-06	3.95e-06	3.95e-06	3.95e-06	3.95e-06	3.95e-06	3.95e-06	3.95e-06	3.95e-06	3.95e-06
86396	3.95e-06	3.95e-06	3.95e-06	3.95e-06	3.95e-06	3.95e-06	3.95e-06	3.95e-06	3.95e-06	3.95e-06
86397	3.95e-06	3.95e-06	3.95e-06	3.95e-06	3.95e-06	3.95e-06	3.95e-06	3.95e-06	3.95e-06	3.95e-06
86398	3.95e-06	3.95e-06	3.95e-06	3.95e-06	3.95e-06	3.95e-06	3.95e-06	3.95e-06	3.95e-06	3.95e-06
86399	3.95e-06	3.95e-06	3.95e-06	3.95e-06	3.95e-06	3.95e-06	3.95e-06	3.95e-06	3.95e-06	3.95e-06
86400	3.95e-06	3.95e-06	3.95e-06	3.95e-06	3.95e-06	3.95e-06	3.95e-06	3.95e-06	3.95e-06	3.95e-06
86401	3.95e-06	3.95e-06	3.95e-06	3.95e-06	3.95e-06	3.95e-06	3.95e-06	3.95e-06	3.95e-06	3.95e-06
86402	3.95e-06	3.95e-06	3.95e-06	3.95e-06	3.95e-06	3.95e-06	3.95e-06	3.95e-06	3.95e-06	3.95e-06
86403	3.95e-06	3.95e-06	3.95e-06	3.95e-06	3.95e-06	3.95e-06	3.95e-06	3.95e-06	3.95e-06	3.95e-06
86404	3.95e-06	3.95e-06	3.95e-06	3.95e-06	3.95e-06	3.95e-06	3.95e-06	3.95e-06	3.95e-06	3.95e-06
86405	3.95e-06	3.95e-06	3.95e-06	3.95e-06	3.95e-06	3.95e-06	3.95e-06	3.95e-06	3.95e-06	3.95e-06
86406	3.95e-06	3.95e-06	3.95e-06	3.95e-06	3.95e-06	3.95e-06	3.95e-06	3.95e-06	3.95e-06	3.95e-06
86407	3.95e-06	3.95e-06	3.95e-06	3.95e-06	3.95e-06	3.95e-06	3.95e-06	3.95e-06	3.95e-06	3.95e-06
86408	3.95e-06	3.95e-06	3.95e-06	3.95e-06	3.95e-06	3.95e-06	3.95e-06	3.95e-06	3.95e-06	3.95e-06
86409	3.95e-06	3.95e-06	3.95e-06	3.95e-06	3.95e-06	3.95e-06	3.95e-06	3.95e-06	3.95e-06	3.95e-06
86410	3.95e-06	3.95e-06	3.95e-06	3.95e-06	3.95e-06	3.95e-06	3.95e-06	3.95e-06	3.95e-06	3.95e-06
86411	3.95e-06	3.95e-06	3.95e-06	3.95e-06	3.95e-06	3.95e-06	3.95e-06	3.95e-06	3.95e-06	3.95e-06
86412	3.95e-06	3.95e-06	3.95e-06	3.95e-06	3.95e-06	3.95e-06	3.95e-06	3.95e-06	3.95e-06	3.95e-06
86413	3.95e-06	3.95e-06	3.95e-06	3.95e-06	3.95e-06	3.95e-06	3.95e-06	3.95e-06	3.95e-06	3.95e-06
86414	3.95e-06	3.95e-06	3.95e-06	3.95e-06	3.95e-06	3.95e-06	3.95e-06	3.95e-06	3.95e-06	3.95e-06
86415	3.95e-06	3.95e-06	3.95e-06	3.95e-06	3.95e-06	3.95e-06	3.95e-06	3.95e-06	3.95e-06	3.95e-06
86416	3.95e-06	3.95e-06	3.95e-06	3.95e-06	3.95e-06	3.95e-06	3.95e-06	3.95e-06	3.95e-06	3.95e-06
86417	3.95e-06	3.95e-06	3.95e-06	3.95e-06	3.95e-06	3.95e-06	3.95e-06	3.95e-06	3.95e-06	3.95e-06
86418	3.95e-06	3.95e-06	3.95e-06	3.95e-06	3.95e-06	3.95e-06	3.95e-06	3.95e-06	3.95e-06	3.95e-06
86419	3.95e-06	3.95e-06	3.95e-06	3.95e-06	3.95e-06	3.95e-06	3.95e-06	3.95e-06	3.95e-06	3.95e-06
86420	3.95e-06	3.95e-06	3.95e-06	3.95e-06	3.95e-06	3.95e-06	3.95e-06	3.95e-06	3.95e-06	3.95e-06
86421	3.95e-06	3.95e-06	3.95e-06	3.95e-06	3.95e-06	3.95e-06	3.95e-06	3.95e-06	3.95e-06	3.95e-06
86422	3.95e-06	3.95e-06	3.95e-06	3.95e-06	3.95e-06	3.95e-06	3.95e-06	3.95e-06	3.95e-06	3.95e-06
86423	3.95e-06	3.95e-06	3.95e-06	3.95e-06	3.95e-06	3.95e-06	3.95e-06	3.95e-06	3.95e-06	3.95e-06
86424	3.95e-06	3.95e-06	3.95e-06	3.95e-06	3.95e-06	3.95e-06	3.95e-06	3.95e-06	3.95e-06	3.95e-06
86425	3.95e-06	3.95e-06	3.95e-06	3.95e-06	3.95e-06	3.95e-06	3.95e-06	3.95e-06	3.95e-06	3.95e-06
86426	3.95e-06	3.95e-06	3.95e-06	3.95e-06	3.95e-06	3.95e-06	3.95e-06	3.95e-06	3.95e-06	3.95e-06
86427	3.95e-06	3.95e-06	3.95e-06	3.95e-06	3.95e-06	3.95e-06	3.95e-06	3.95e-06	3.95e-06	3.95e-06
86428	3.95e-06	3.95e-06	3.95e-06	3.95e-06	3.95e-06	3.95e-06	3.95e-06	3.95e-06	3.95e-06	3.95e-06
86429	3.95e-06	3.95e-06	3.95e-06	3.95e-06	3.95e-06	3.95e-06	3.95e-06	3.95e-06	3.95e-06	3.95e-06
86430	3.95e-06	3.95e-06	3.95e-06	3.95e-06	3.95e-06	3.95e-06	3.95e-06	3.95e-06	3.95e-06	3.95e-06
86431	3.95e-06	3.95e-06	3.95e-06	3.95e-06	3.95e-06	3.95e-06	3.95e-06	3.95e-06	3.95e-06	3.95e-06
86432	3.95e-06	3.95e-06	3.95e-06	3.95e-06	3.95e-06	3.95e-06	3.95e-06	3.95e-06	3.95e-06	3.95e-06
86433	3.95e-06	3.95e-06	3.95e-06	3.95e-06	3.95e-06	3.95e-06	3.95e-06	3.95e-06	3.95e-06	3.95e-06
86434	3.95e-06	3.95e-06	3.95e-06	3.95e-06	3.95e-06	3.95e-06	3.95e-06	3.95e-06	3.95e-06	3.95e-06
86435	3.95e-06	3.95e-06	3.95e-06	3.95e-06	3.95e-06	3.95e-06	3.95e-06	3.95e-06	3.95e-06	3.95e-06
86436	3.95e-06	3.95e-06	3.95e-06	3.95e-06	3.95e-06	3.95e-06	3.95e-06	3.95e-06	3.95e-06	3.95e-06
86437	3.95e-06	3.95e-06	3.95e-06	3.95e-06	3.95e-06	3.95e-06	3.95e-06	3.95e-06	3.95e-06	3.95e-06
86438	3.95e-06	3.95e-06	3.95e-06	3.95e-06	3.95e-06	3.95e-06	3.95e-06	3.95e-06	3.95e-06	3.95e-06
86439	3.95e-06	3.95e-06	3.95e-06	3.95e-06	3.95e-06	3.95e-06	3.95e-06	3.95e-06	3.95e-06	3.95e-06
86440	3.95e-06	3.95e-06	3.95e-06	3.95e-06	3.95e-06	3.95e-06	3.95e-06	3.95e-06	3.95e-06	3.95e-06
86441	3.95e-06	3.95e-06	3.95e-06	3.95e-06	3.95e-06	3.95e-06	3.95e-06	3.95e-06	3.95e-06	3.95e-06
86442	3.95e-06	3.95e-06	3.95e-06	3.95e-06	3.95e-06	3.95e-06	3.95e-06	3.95e-06	3.95e-06	3.95e-06
86443	3.95e-06	3.95e-06	3.95e-06	3.95e-06	3.95e-06	3.95e-06	3.95e-06	3.95e-06	3.95e-06	3.95e-06
86444	3.95e-06	3.95e-06	3.95e-06	3.95e-06	3.95e-06	3.95e-06	3.95e-06	3.95e-06	3.95e-06	3.95e-06
86445	3.95e-06	3.95e-06	3.95e-06	3.95e-06	3.95e-06	3.95e-06	3.95e-06	3.95e-06	3.95e-06	3.95e-06
86446	3.95e-06	3.95e-06	3.95e-06	3.95e-06	3.95e-06	3.95e-06	3.95e-06	3.95e-06	3.95e-06	3.95e-06
86447	3.95e-06	3.95e-06	3.95e-06	3.95e-06	3.95e-06	3.95e-06	3.95e-06	3.95e-06	3.95e-06	3.95e-06
86448	3.95e-06	3.95e-06	3.95e-06	3.95e-06	3.95e-06	3.95e-06	3.95e-06	3.95e-06	3.95e-06	3.95e-06
86449	3.95e-06	3.95e-06	3.95e-06	3.95e-06	3.95e-06	3.95e-06	3.95e-06	3.95e-06	3.95e-06	3.95e-06
86450	3.95e-06	3.95e-06	3.95e-06	3.95e-06	3.95e-06	3.95e-06	3.95e-06	3.95e-06	3.95e-06	3.95e-06
86451	3.95e-06	3.95e-06	3.95e-06	3.95e-06	3.95e-06	3.95e-06	3.95e-06	3.95e-06	3.95e-06	3.95e-06
86452	3.95e-06	3.95e-06	3.95e-06	3.95e-06	3.95e-06	3.95e-06	3.95e-06	3.95e-06	3.95e-06	3.95e-06
86453	3.95e-06	3.95e-06	3.95e-06	3.95e-06	3.95e-06	3.95e-06	3.95e-06	3.95e-06	3.95e-06	3.95e-06
86454	3.95e-06	3.95e-06	3.95e-06	3.95e-06	3.95e-06	3.95e-06	3.95e-06	3.95e-06	3.95e-06	3.95e-06
86455	3.95e-06	3.95e-06	3.95e-06	3.95e-06	3.95e-06	3.95e-06	3.95e-06	3.95e-06	3.95e-06	3.95e-06
86456	3.95e-06	3.95e-06	3.95e-06	3.95e-06	3.95e-06	3.95e-06	3.95e-06	3.95e-06	3.95e-06	3.95e-06
86457	3.95e-06	3.95e-06	3.95e-06	3.95e-06	3.95e-06	3.95e-06	3.95e-06	3.95e-06	3.95e-06	3.95e-06
86458	3.95e-06	3.95e-06	3.95e-06	3.95e-06	3.95e-06	3.95e-06	3.95e-06	3.95e-06	3.95e-06	3.95e-06
86459	3.95e-06	3.95e-06	3.95e-06	3.95e-06	3.95e-06	3.95e-06	3.95e-06	3.95e-06	3.95e-06	3.95e-06
86460	3.95e-06	3.95e-06	3.95e-06	3.95e-06	3.95e-06	3.95e-06	3.95e-06	3.95e-06	3.95e-06	3.95e-06
86461	3.95e-06	3.95e-06	3.95e-06	3.95e-06	3.95e-06	3.95e-06	3.95e-06	3.95e-06	3.95e-06	3.95e-06
86462	3.95e-06	3.95e-06	3.95e-06	3.95e-06	3.95e-06	3.95e-06	3.95e-06	3.95e-06	3.95e-06	3.95e-06
86463	3.95e-06	3.95e-06	3.95e-06	3.95e-06	3.95e-06	3.95e-06	3.95e-06	3.95e-06	3.95e-06	3.95e-06
86464	3.95e-06	3.95e-06	3.95e-06	3.95e-06	3.95e-06	3.95e-06	3.95e-06	3.95e-06	3.95e-06	3.95e-06
86465	3.95e-06	3.95e-06	3.95e-06	3.95e-06	3.95e-06	3.95e-06	3.95e-06	3.95e-06	3.95e-06	3.95e-06
86466	3.95e-06	3.95e-06	3.95e-06	3.95e-06	3.95e-06	3.95e-06	3.95e-06	3.95e-06	3.95e-06	3.95e-06
86467	3.95e-06	3.95e-06	3.95e-06	3.95e-06	3.95e-06	3.95e-06	3.95e-06	3.95e-06	3.95e-06	3.95e-06
86468	3.95e-06	3.95e-06	3.95e-06	3.95e-06	3.95e-06	3.95e-06	3.95e-06	3.95e-06	3.95e-06	3.95e-06
86469	3.95e-06	3.95e-06	3.95e-06	3.95e-06	3.95e-06	3.95e-06	3.95e-06	3.95e-06	3.95e-06	3.95e-06
86470	3.95e-06	3.95e-06	3.95e-06	3.95e-06	3.95e-06	3.95e-06	3.95e-06	3.95e-06	3.95e-06	3.95e-06
86471	3.95e-06	3.95e-06	3.95e-06	3.95e-06	3.95e-06	3.95e-06	3.95e-06	3.95e-06	3.95e-06	3.95e-06
86472	3.95e-06	3.95e-06	3.95e-06	3.95e-06	3.95e-06	3.95e-06	3.95e-06	3.95e-06	3.95e-06	3.95e-06
86473	3.95e-06	3.95e-06	3.95e-06	3.95e-06	3.95e-06	3.95e-06	3.95e-06	3.95e-06	3.95e-06	3.95e-06
86474	3.95e-06	3.95e-06	3.95e-06	3.95e-06	3.95e-06	3.95e-06	3.95e-06	3.95e-06	3.95e-06	3.95e-06
86475	3.95e-06	3.95e-06	3.95e-06	3.95e-06	3.95e-06	3.95e-06	3.95e-06	3.95e-06	3.95e-06	3.95e-06
86476	3.95e-06	3.95e-06	3.95e-06	3.95e-06	3.95e-06	3.95e-06	3.95e-06	3.95e-06	3.95e-06	3.95e-06
86477	3.95e-06	3.95e-06	3.95e-06	3.95e-06	3.95e-06	3.95e-06	3.95e-06	3.95e-06	3.95e-06	3.95e-06
86478	3.95e-06	3.95e-06	3.95e-06	3.95e-06	3.95e-06	3.95e-06	3.95e-06	3.95e-06	3.95e-06	3.95e-06
86479	3.95e-06	3.95e-06	3.95e-06	3.95e-06	3.95e-06	3.95e-06	3.95e-06	3.95e-06	3.95e-06	3.95e-06
86480	3.95e-06	3.95e-06	3.95e-06	3.95e-06	3.95e-06	3.95e-06	3.95e-06	3.95e-06	3.95e-06	3.95e-06
86481	3.95e-06	3.95e-06	3.95e-06	3.95e-06	3.95e-06	3.95e-06	3.95e-06	3.95e-06	3.95e-06	3.95e-06
86482	3.95e-06	3.95e-06	3.95e-06	3.95e-06	3.95e-06	3.95e-06	3.95e-06	3.95e-06	3.95e-06	3.95e-06
86483	3.95e-06	3.95e-06	3.95e-06	3.95e-06	3.95e-06	3.95e-06	3.95e-06	3.95e-06	3.95e-06	3.95e-06
86484	3.95e-06	3.95e-06	3.95e-06	3.95e-06	3.95e-06	3.95e-06	3.95e-06	3.95e-06	3.95e-06	3.95e-06
86485	3.95e-06	3.95e-06	3.95e-06	3.95e-06	3.95e-06	3.95e-06	3.95e-06	3.95e-06	3.95e-06	3.95e-06
86486	3.95e-06	3.95e-06	3.95e-06	3.95e-06	3.95e-06	3.95e-06	3.95e-06	3.95e-06	3.95e-06	3.95e-06
86487	3.95e-06	3.95e-06	3.95e-06	3.95e-06	3.95e-06	3.95e-06	3.95e-06	3.95e-06	3.95e-06	3.95e-06
86488	3.95e-06	3.95e-06	3.95e-06	3.95e-06	3.95e-06	3.95e-06	3.95e-06	3.95e-06	3.95e-06	3.95e-06
86489	3.95e-06	3.95e-06	3.95e-06	3.95e-06	3.95e-06	3.95e-06	3.95e-06	3.95e-06	3.95e-06	3.95e-06
86490	3.95e-06	3.95e-06	3.95e-06	3.95e-06	3.95e-06	3.95e-06	3.95e-06	3.95e-06	3.95e-06	3.95e-06
86491	3.95e-06	3.95e-06	3.95e-06	3.95e-06	3.95e-06	3.95e-06	3.95e-06	3.95e-06	3.95e-06	3.95e-06
86492	3.95e-06	3.95e-06	3.95e-06	3.95e-06	3.95e-06	3.95e-06	3.95e-06	3.95e-06	3.95e-06	3.95e-06
86493	3.95e-06	3.95e-06	3.95e-06	3.95e-06	3.95e-06	3.95e-06	3.95e-06	3.95e-06	3.95e-06	3.95e-06
86494	3.95e-06	3.95e-06	3.95e-06	3.95e-06	3.95e-06	3.95e-06	3.95e-06	3.95e-06	3.95e-06	3.95e-06
86495	3.95e-06	3.95e-06	3.95e-06	3.95e-06	3.95e-06	3.95e-06	3.95e-06	3.95e-06	3.95e-06	3.95e-06
86496	3.95e-06	3.95e-06	3.95e-06	3.95e-06	3.95e-06	3.95e-06	3.95e-06	3.95e-06	3.95e-06	3.95e-06
86497	3.95e-06	3.95e-06	3.95e-06	3.95e-06	3.95e-06	3.95e-06	3.95e-06	3.95e-06	3.95e-06	3.95e-06
86498	3.95e-06	3.95e-06	3.95e-06	3.95e-06	3.95e-06	3.95e-06	3.95e-06	3.95e-06	3.95e-06	3.95e-06
86499	3.95e-06	3.95e-06	3.95e-06	3.95e-06	3.95e-06	3.95e-06	3.95e-06	3.95e-06	3.95e-06	3.95e-06
86500	3.95e-06	3.95e-06	3.95e-06	3.95e-06	3.95e-06	3.95e-06	3.95e-06	3.95e-06	3.95e-06	3.95e-06
86501	3.95e-06	3.95e-06	3.95e-06	3.95e-06	3.95e-06	3.95e-06	3.95e-06	3.95e-06	3.95e-06	3.95e-06
86502	3.95e-06	3.95e-06	3.95e-06	3.95e-06	3.95e-06	3.95e-06	3.95e-06	3.95e-06	3.95e-06	3.95e-06
86503	3.95e-06	3.95e-06	3.95e-06	3.95e-06	3.95e-06	3.95e-06	3.95e-06	3.95e-06	3.95e-06	3.95e-06
86504	3.95e-06	3.95e-06	3.95e-06	3.95e-06	3.95e-06	3.95e-06	3.95e-06	3.95e-06	3.95e-06	3.95e-06
86505	3.95e-06	3.95e-06	3.95e-06	3.95e-06	3.95e-06	3.95e-06	3.95e-06	3.95e-06	3.95e-06	3.95e-06
86506	3.95e-06	3.95e-06	3.95e-06	3.95e-06	3.95e-06	3.95e-06	3.95e-06	3.95e-06	3.95e-06	3.95e-06
86507	3.95e-06	3.95e-06	3.95e-06	3.95e-06	3.95e-06	3.95e-06	3.95e-06	3.95e-06	3.95e-06	3.95e-06
86508	3.95e-06	3.95e-06	3.95e-06	3.95e-06	3.95e-06	3.95e-06	3.95e-06	3.95e-06	3.95e-06	3.95e-06
86509	3.95e-06	3.95e-06	3.95e-06	3.95e-06	3.95e-06	3.95e-06	3.95e-06	3.95e-06	3.95e-06	3.95e-06
86510	3.95e-06	3.95e-06	3.95e-06	3.95e-06	3.95e-06	3.95e-06	3.95e-06	3.95e-06	3.95e-06	3.95e-06
86511	3.95e-06	3.95e-06	3.95e-06	3.95e-06	3.95e-06	3.95e-06	3.95e-06	3.95e-06	3.95e-06	3.95e-06
86512	3.95e-06	3.95e-06	3.95e-06	3.95e-06	3.95e-06	3.95e-06	3.95e-06	3.95e-06	3.95e-06	3.95e-06
86513	3.95e-06	3.95e-06	3.95e-06	3.95e-06	3.95e-06	3.95e-06	3.95e-06	3.95e-06	3.95e-06	3.95e-06
86514	3.95e-06	3.95e-06	3.95e-06	3.95e-06	3.95e-06	3.95e-06	3.95e-06	3.95e-06	3.95e-06	3.95e-06
86515	3.95e-06	3.95e-06	3.95e-06	3.95e-06	3.95e-06	3.95e-06	3.95e-06	3.95e-06	3.95e-06	3.95e-06
86516	3.95e-06	3.95e-06	3.95015e-06	3.95e-06	3.95e-06	3.95e-06	3.95e-06	3.95e-06	3.95e-06	3.95e-06
86517	3.95e-06	3.95e-06	3.95075e-06	3.95e-06	3.95e-06	3.95e-06	3.95e-06	3.95e-06	3.95e-06	3.95e-06
86518	3.95e-06	3.95e-06	3.95134e-06	3.95e-06	3.95e-06	3.95e-06	3.95e-06	3.95e-06	3.95e-06	3.95e-06
86519	3.95e-06	3.95e-06	3.95193e-06	3.95e-06	3.95e-06	3.95e-06	3.95e-06	3.95e-06	3.95e-06	3.95e-06
86520	3.95e-06	3.95e-06	3.95253e-06	3.95e-06	3.95e-06	3.95e-06	3.95e-06	3.95e-06	3.95e-06	3.95e-06
86521	3.95e-06	3.95e-06	3.95312e-06	3.95e-06	3.95e-06	3.95e-06	3.95e-06	3.95e-06	3.95e-06	3.95e-06
86522	3.95e-06	3.95e-06	3.95371e-06	3.95e-06	3.95e-06	3.95e-06	3.95e-06	3.95e-06	3.95e-06	3.95e-06
86523	3.95e-06	3.95e-06	3.95431e-06	3.95e-06	3.95e-06	3.95e-06	3.95e-06	3.95e-06	3.95e-06	3.95e-06
86524	3.95e-06	3.95e-06	3.9549e-06	3.95e-06	3.95e-06	3.95e-06	3.95e-06	3.95e-06	3.95e-06	3.95e-06
86525	3.95e-06	3.95e-06	3.95549e-06	3.95e-06	3.95e-06	3.95e-06	3.95e-06	3.95e-06	3.95e-06	3.95e-06
86526	3.95e-06	3.95e-06	3.95609e-06	3.95e-06	3.95e-06	3.95e-06	3.95e-06	3.95e-06	3.95e-06	3.95e-06
86527	3.95024e-06	3.95e-06	3.95668e-06	3.95e-06	3.95003e-06	3.95e-06	3.95e-06	3.95e-06	3.95025e-06	3.95e-06
86528	3.95082e-06	3.95006e-06	3.95727e-06	3.95e-06	3.95049e-06	3.95005e-06	3.95e-06	3.95e-06	3.95083e-06	3.95008e-06
86529	3.95142e-06	3.95058e-06	3.95787e-06	3.95e-06	3.95108e-06	3.95056e-06	3.95e-06	3.95e-06	3.95142e-06	3.95062e-06
86530	3.95201e-06	3.95117e-06	3.95846e-06	3.95e-06	3.95167e-06	3.95115e-06	3.95e-06	3.95e-06	3.95201e-06	3.95121e-06
86531	3.9526e-06	3.95177e-06	3.95905e-06	3.95e-06	3.95227e-06	3.95174e-06	3.95e-06	3.95e-06	3.95261e-06	3.9518e-06
86532	3.95319e-06	3.95236e-06	3.95965e-06	3.95e-06	3.95286e-06	3.95234e-06	3.95e-06	3.95e-06	3.9532e-06	3.9524e-06
86533	3.95379e-06	3.95295e-06	3.96024e-06	3.95002e-06	3.95345e-06	3.95293e-06	3.95003e-06	3.95005e-06	3.95379e-06	3.95299e-06
86534	3.95438e-06	3.95355e-06	3.96084e-06	3.9504e-06	3.95405e-06	3.95352e-06	3.95047e-06	3.95055e-06	3.95439e-06	3.95358e-06
86535	3.95497e-06	3.95414e-06	3.96143e-06	3.95099e-06	3.95464e-06	3.95411e-06	3.95106e-06	3.95115e-06	3.95498e-06	3.95417e-06
86536	3.95557e-06	3.95473e-06	3.96202e-06	3.95158e-06	3.95523e-06	3.95471e-06	3.95165e-06	3.95174e-06	3.95557e-06	3.95477e-06
86537	3.95616e-06	3.95533e-06	3.96262e-06	3.95217e-06	3.95583e-06	3.9553e-06	3.95225e-06	3.95233e-06	3.95617e-06	3.95536e-06
86538	3.95675e-06	3.95592e-06	3.96321e-06	3.95277e-06	3.95642e-06	3.95589e-06	3.95284e-06	3.95293e-06	3.95676e-06	3.95595e-06
86539	3.95735e-06	3.95651e-06	3.96381e-06	3.95336e-06	3.95701e-06	3.95649e-06	3.95343e-06	3.95352e-06	3.95735e-06	3.95655e-06
86540	3.95794e-06	3.95711e-06	3.9644e-06	3.95395e-06	3.95761e-06	3.95708e-06	3.95403e-06	3.95411e-06	3.95795e-06	3.95714e-06
86541	3.95853e-06	3.9577e-06	3.965e-06	3.95454e-06	3.9582e-06	3.95767e-06	3.95462e-06	3.95471e-06	3.95854e-06	3.95773e-06
86542	3.95913e-06	3.95829e-06	3.96559e-06	3.95514e-06	3.95879e-06	3.95827e-06	3.95521e-06	3.9553e-06	3.95913e-06	3.95833e-06
86543	3.95972e-06	3.95889e-06	3.96619e-06	3.95573e-06	3.95939e-06	3.95886e-06	3.95581e-06	3.95589e-06	3.95973e-06	3.95892e-06
86544	3.96032e-06	3.95948e-06	3.96678e-06	3.95632e-06	3.95998e-06	3.95946e-06	3.9564e-06	3.95649e-06	3.96032e-06	3.95952e-06
86545	3.96091e-06	3.96007e-06	3.96738e-06	3.95692e-06	3.96058e-06	3.96005e-06	3.95699e-06	3.95708e-06	3.96092e-06	3.96011e-06
86546	3.9615e-06	3.96067e-06	3.96797e-06	3.95751e-06	3.96117e-06	3.96064e-06	3.95759e-06	3.95767e-06	3.96151e-06	3.9607e-06
86547	3.9621e-06	3.96126e-06	3.96857e-06	3.95811e-06	3.96176e-06	3.96124e-06	3.95818e-06	3.95827e-06	3.9621e-06	3.9613e-06
86548	3.96269e-06	3.96186e-06	3.96916e-06	3.9587e-06	3.96236e-06	3.96183e-06	3.95877e-06	3.95886e-06	3.9627e-06	3.96189e-06
86549	3.96329e-06	3.96245e-06	3.96976e-06	3.95929e-06	3.96295e-06	3.96243e-06	3.95937e-06	3.95945e-06	3.96329e-06	3.96249e-06
86550	3.96388e-06	3.96305e-06	3.97035e-06	3.95989e-06	3.96355e-06	3.96302e-06	3.95996e-06	3.96005e-06	3.96389e-06	3.96308e-06
86551	3.96448e-06	3.96364e-06	3.97095e-06	3.96048e-06	3.96414e-06	3.96362e-06	3.96055e-06	3.96064e-06	3.96448e-06	3.96368e-06
86552	3.96507e-06	3.96423e-06	3.97154e-06	3.96108e-06	3.96474e-06	3.96421e-06	3.96115e-06	3.96124e-06	3.96508e-06	3.96427e-06
86553	3.96567e-06	3.96483e-06	3.97214e-06	3.96167e-06	3.96533e-06	3.9648e-06	3.96174e-06	3.96183e-06	3.96567e-06	3.96486e-06
86554	3.96626e-06	3.96542e-06	3.97274e-06	3.96226e-06	3.96593e-06	3.9654e-06	3.96234e-06	3.96243e-06	3.96627e-06	3.96546e-06
86555	3.96686e-06	3.96602e-06	3.97333e-06	3.96286e-06	3.96652e-06	3.96599e-06	3.96293e-06	3.96302e-06	3.96686e-06	3.96605e-06
86556	3.96745e-06	3.96661e-06	3.97393e-06	3.96345e-06	3.96712e-06	3.96659e-06	3.96353e-06	3.96361e-06	3.96746e-06	3.96665e-06
86557	3.96805e-06	3.96721e-06	3.97452e-06	3.96405e-06	3.96771e-06	3.96718e-06	3.96412e-06	3.96421e-06	3.96805e-06	3.96724e-06
86558	3.96864e-06	3.9678e-06	3.97512e-06	3.96464e-06	3.96831e-06	3.96778e-06	3.96472e-06	3.9648e-06	3.96865e-06	3.96784e-06
86559	3.96924e-06	3.9684e-06	3.97572e-06	3.96524e-06	3.9689e-06	3.96837e-06	3.96531e-06	3.9654e-06	3.96924e-06	3.96843e-06
86560	3.96983e-06	3.96899e-06	3.97631e-06	3.96583e-06	3.9695e-06	3.96897e-06	3.96591e-06	3.96599e-06	3.96984e-06	3.96903e-06
86561	3.97043e-06	3.96959e-06	3.97691e-06	3.96643e-06	3.97009e-06	3.96956e-06	3.9665e-06	3.96659e-06	3.97043e-06	3.96963e-06
86562	3.97102e-06	3.97018e-06	3.97751e-06	3.96702e-06	3.97069e-06	3.97016e-06	3.96709e-06	3.96718e-06	3.97103e-06	3.97022e-06
86563	3.97162e-06	3.97078e-06	3.9781e-06	3.96762e-06	3.97128e-06	3.97076e-06	3.96769e-06	3.96778e-06	3.97162e-06	3.97082e-06
86564	3.97221e-06	3.97138e-06	3.9787e-06	3.96821e-06	3.97188e-06	3.97135e-06	3.96829e-06	3.96837e-06	3.97222e-06	3.97141e-06
86565	3.97281e-06	3.97197e-06	3.9793e-06	3.96881e-06	3.97247e-06	3.97195e-06	3.96888e-06	3.96897e-06	3.97282e-06	3.97201e-06
86566	3.97341e-06	3.97257e-06	3.97989e-06	3.9694e-06	3.97307e-06	3.97254e-06	3.96948e-06	3.96956e-06	3.97341e-06	3.9726e-06
86567	3.974e-06	3.97316e-06	3.98049e-06	3.97e-06	3.97367e-06	3.97314e-06	3.97007e-06	3.97016e-06	3.97401e-06	3.9732e-06
86568	3.9746e-06	3.97376e-06	3.98109e-06	3.97059e-06	3.97426e-06	3.97374e-06	3.97067e-06	3.97075e-06	3.9746e-06	3.9738e-06
86569	3.97519e-06	3.97436e-06	3.98168e-06	3.97119e-06	3.97486e-06	3.97433e-06	3.97126e-06	3.97135e-06	3.9752e-06	3.97439e-06
86570	3.97579e-06	3.97495e-06	3.98228e-06	3.97178e-06	3.97545e-06	3.97493e-06	3.97186e-06	3.97195e-06	3.9758e-06	3.97499e-06
86571	3.97639e-06	3.97555e-06	3.98288e-06	3.97238e-06	3.97605e-06	3.97552e-06	3.97245e-06	3.97254e-06	3.97639e-06	3.97558e-06
86572	3.97698e-06	3.97614e-06	3.98348e-06	3.97298e-06	3.97665e-06	3.97612e-06	3.97305e-06	3.97314e-06	3.97699e-06	3.97618e-06
86573	3.97758e-06	3.97674e-06	3.98407e-06	3.97357e-06	3.97724e-06	3.97672e-06	3.97365e-06	3.97373e-06	3.97759e-06	3.97678e-06
86574	3.97818e-06	3.97734e-06	3.98467e-06	3.97417e-06	3.97784e-06	3.97731e-06	3.97424e-06	3.97433e-06	3.97818e-06	3.97737e-06
86575	3.97877e-06	3.97793e-06	3.98527e-06	3.97476e-06	3.97844e-06	3.97791e-06	3.97484e-06	3.97493e-06	3.97878e-06	3.97797e-06
86576	3.97937e-06	3.97853e-06	3.98587e-06	3.97536e-06	3.97903e-06	3.97851e-06	3.97543e-06	3.97552e-06	3.97938e-06	3.97857e-06
86577	3.97997e-06	3.97913e-06	3.98646e-06	3.97596e-06	3.97963e-06	3.9791e-06	3.97603e-06	3.97612e-06	3.97997e-06	3.97916e-06
86578	3.98056e-06	3.97972e-06	3.98706e-06	3.97655e-06	3.98023e-06	3.9797e-06	3.97663e-06	3.97672e-06	3.98057e-06	3.97976e-06
86579	3.98116e-06	3.98032e-06	3.98766e-06	3.97715e-06	3.98083e-06	3.9803e-06	3.97722e-06	3.97731e-06	3.98117e-06	3.98036e-06
86580	3.98176e-06	3.98092e-06	3.98826e-06	3.97775e-06	3.98142e-06	3.98089e-06	3.97782e-06	3.97791e-06	3.98176e-06	3.98095e-06
86581	3.98236e-06	3.98152e-06	3.98886e-06	3.97834e-06	3.98202e-06	3.98149e-06	3.97842e-06	3.97851e-06	3.98236e-06	3.98155e-06
86582	3.98295e-06	3.98211e-06	3.98946e-06	3.97894e-06	3.98262e-06	3.98209e-06	3.97901e-06	3.9791e-06	3.98296e-06	3.98215e-06
86583	3.98355e-06	3.98271e-06	3.99005e-06	3.97954e-06	3.98321e-06	3.98269e-06	3.97961e-06	3.9797e-06	3.98356e-06	3.98275e-06
86584	3.98415e-06	3.98331e-06	3.99065e-06	3.98013e-06	3.98381e-06	3.98328e-06	3.98021e-06	3.9803e-06	3.98415e-06	3.98334e-06
86585	3.98475e-06	3.98391e-06	3.99125e-06	3.98073e-06	3.98441e-06	3.98388e-06	3.9808e-06	3.98089e-06	3.98475e-06	3.98394e-06
86586	3.98534e-06	3.9845e-06	3.99185e-06	3.98133e-06	3.98501e-06	3.98448e-06	3.9814e-06	3.98149e-06	3.98535e-06	3.98454e-06
86587	3.98594e-06	3.9851e-06	3.99245e-06	3.98192e-06	3.9856e-06	3.98508e-06	3.982e-06	3.98209e-06	3.98595e-06	3.98514e-06
86588	3.98654e-06	3.9857e-06	3.99305e-06	3.98252e-06	3.9862e-06	3.98567e-06	3.9826e-06	3.98268e-06	3.98655e-06	3.98573e-06
86589	3.98714e-06	3.9863e-06	3.99365e-06	3.98312e-06	3.9868e-06	3.98627e-06	3.98319e-06	3.98328e-06	3.98714e-06	3.98633e-06
86590	3.98774e-06	3.98689e-06	3.99425e-06	3.98372e-06	3.9874e-06	3.98687e-06	3.98379e-06	3.98388e-06	3.98774e-06	3.98693e-06
86591	3.98833e-06	3.98749e-06	3.99484e-06	3.98431e-06	3.988e-06	3.98747e-06	3.98439e-06	3.98448e-06	3.98834e-06	3.98753e-06
86592	3.98893e-06	3.98809e-06	3.99544e-06	3.98491e-06	3.9886e-06	3.98807e-06	3.98499e-06	3.98507e-06	3.98894e-06	3.98813e-06
86593	3.98953e-06	3.98869e-06	3.99604e-06	3.98551e-06	3.98919e-06	3.98866e-06	3.98558e-06	3.98567e-06	3.98954e-06	3.98872e-06
86594	3.99013e-06	3.98929e-06	3.99664e-06	3.98611e-06	3.98979e-06	3.98926e-06	3.98618e-06	3.98627e-06	3.99013e-06	3.98932e-06
86595	3.99073e-06	3.98989e-06	3.99724e-06	3.98671e-06	3.99039e-06	3.98986e-06	3.98678e-06	3.98687e-06	3.99073e-06	3.98992e-06
86596	3.99133e-06	3.99048e-06	3.99784e-06	3.9873e-06	3.99099e-06	3.99046e-06	3.98738e-06	3.98747e-06	3.99133e-06	3.99052e-06
86597	3.99192e-06	3.99108e-06	3.99844e-06	3.9879e-06	3.99159e-06	3.99106e-06	3.98798e-06	3.98806e-06	3.99193e-06	3.99112e-06
86598	3.99252e-06	3.99168e-06	3.99904e-06	3.9885e-06	3.99219e-06	3.99166e-06	3.98857e-06	3.98866e-06	3.99253e-06	3.99172e-06
86599	3.99312e-06	3.99228e-06	3.99964e-06	3.9891e-06	3.99279e-06	3.99226e-06	3.98917e-06	3.98926e-06	3.99313e-06	3.99232e-06
86600	3.99372e-06	3.99288e-06	4.00024e-06	3.9897e-06	3.99338e-06	3.99285e-06	3.98977e-06	3.98986e-06	3.99373e-06	3.99291e-06
86601	3.99432e-06	3.99348e-06	4.00084e-06	3.9903e-06	3.99398e-06	3.99345e-06	3.99037e-06	3.99046e-06	3.99433e-06	3.99351e-06
86602	3.99492e-06	3.99408e-06	4.00144e-06	3.99089e-06	3.99458e-06	3.99405e-06	3.99097e-06	3.99106e-06	3.99493e-06	3.99411e-06
86603	3.99552e-06	3.99468e-06	4.00204e-06	3.99149e-06	3.99518e-06	3.99465e-06	3.99157e-06	3.99166e-06	3.99552e-06	3.99471e-06
86604	3.99612e-06	3.99528e-06	4.00264e-06	3.99209e-06	3.99578e-06	3.99525e-06	3.99217e-06	3.99225e-06	3.99612e-06	3.99531e-06
86605	3.99672e-06	3.99587e-06	4.00324e-06	3.99269e-06	3.99638e-06	3.99585e-06	3.99276e-06	3.99285e-06	3.99672e-06	3.99591e-06
86606	3.99732e-06	3.99647e-06	4.00384e-06	3.99329e-06	3.99698e-06	3.99645e-06	3.99336e-06	3.99345e-06	3.99732e-06	3.99651e-06
86607	3.99792e-06	3.99707e-06	4.00444e-06	3.99389e-06	3.99758e-06	3.99705e-06	3.99396e-06	3.99405e-06	3.99792e-06	3.99711e-06
86608	3.99852e-06	3.99767e-06	4.00504e-06	3.99449e-06	3.99818e-06	3.99765e-06	3.99456e-06	3.99465e-06	3.99852e-06	3.99771e-06
86609	3.99912e-06	3.99827e-06	4.00564e-06	3.99509e-06	3.99878e-06	3.99825e-06	3.99516e-06	3.99525e-06	3.99912e-06	3.99831e-06
86610	3.99972e-06	3.99887e-06	4.00625e-06	3.99569e-06	3.99938e-06	3.99885e-06	3.99576e-06	3.99585e-06	3.99972e-06	3.99891e-06
86611	4.00032e-06	3.99947e-06	4.00685e-06	3.99628e-06	3.99998e-06	3.99945e-06	3.99636e-06	3.99645e-06	4.00032e-06	3.99951e-06
86612	4.00092e-06	4.00007e-06	4.00745e-06	3.99688e-06	4.00058e-06	4.00005e-06	3.99696e-06	3.99705e-06	4.00092e-06	4.00011e-06
86613	4.00152e-06	4.00067e-06	4.00805e-06	3.99748e-06	4.00118e-06	4.00065e-06	3.99756e-06	3.99765e-06	4.00152e-06	4.00071e-06
86614	4.00212e-06	4.00127e-06	4.00865e-06	3.99808e-06	4.00178e-06	4.00125e-06	3.99816e-06	3.99825e-06	4.00212e-06	4.00131e-06
86615	4.00272e-06	4.00187e-06	4.00925e-06	3.99868e-06	4.00238e-06	4.00185e-06	3.99876e-06	3.99885e-06	4.00272e-06	4.00191e-06
86616	4.00332e-06	4.00247e-06	4.00985e-06	3.99928e-06	4.00298e-06	4.00245e-06	3.99936e-06	3.99945e-06	4.00332e-06	4.00251e-06
86617	4.00392e-06	4.00307e-06	4.01045e-06	3.99988e-06	4.00358e-06	4.00305e-06	3.99996e-06	4.00005e-06	4.00392e-06	4.00311e-06
86618	4.00452e-06	4.00367e-06	4.01106e-06	4.00048e-06	4.00418e-06	4.00365e-06	4.00056e-06	4.00065e-06	4.00452e-06	4.00371e-06
86619	4.00512e-06	4.00427e-06	4.01166e-06	4.00108e-06	4.00478e-06	4.00425e-06	4.00116e-06	4.00125e-06	4.00512e-06	4.00431e-06
86620	4.00572e-06	4.00487e-06	4.01226e-06	4.00168e-06	4.00538e-06	4.00485e-06	4.00176e-06	4.00185e-06	4.00573e-06	4.00491e-06
86621	4.00632e-06	4.00548e-06	4.01286e-06	4.00228e-06	4.00598e-06	4.00545e-06	4.00236e-06	4.00245e-06	4.00633e-06	4.00551e-06
86622	4.00692e-06	4.00608e-06	4.01346e-06	4.00288e-06	4.00658e-06	4.00605e-06	4.00296e-06	4.00305e-06	4.00693e-06	4.00611e-06
86623	4.00752e-06	4.00668e-06	4.01406e-06	4.00348e-06	4.00718e-06	4.00665e-06	4.00356e-06	4.00365e-06	4.00753e-06	4.00671e-06
86624	4.00812e-06	4.00728e-06	4.01467e-06	4.00408e-06	4.00779e-06	4.00725e-06	4.00416e-06	4.00425e-06	4.00813e-06	4.00731e-06
86625	4.00873e-06	4.00788e-06	4.01527e-06	4.00469e-06	4.00839e-06	4.00785e-06	4.00476e-06	4.00485e-06	4.00873e-06	4.00792e-06
86626	4.00933e-06	4.00848e-06	4.01587e-06	4.00529e-06	4.00899e-06	4.00846e-06	4.00536e-06	4.00545e-06	4.00933e-06	4.00852e-06
86627	4.00993e-06	4.00908e-06	4.01647e-06	4.00589e-06	4.00959e-06	4.00906e-06	4.00596e-06	4.00605e-06	4.00993e-06	4.00912e-06
86628	4.01053e-06	4.00968e-06	4.01708e-06	4.00649e-06	4.01019e-06	4.00966e-06	4.00656e-06	4.00665e-06	4.01054e-06	4.00972e-06
86629	4.01113e-06	4.01028e-06	4.01768e-06	4.00709e-06	4.01079e-06	4.01026e-06	4.00716e-06	4.00725e-06	4.01114e-06	4.01032e-06
86630	4.01173e-06	4.01089e-06	4.01828e-06	4.00769e-06	4.01139e-06	4.01086e-06	4.00776e-06	4.00785e-06	4.01174e-06	4.01092e-06
86631	4.01233e-06	4.01149e-06	4.01888e-06	4.00829e-06	4.012e-06	4.01146e-06	4.00837e-06	4.00845e-06	4.01234e-06	4.01152e-06
86632	4.01294e-06	4.01209e-06	4.01949e-06	4.00889e-06	4.0126e-06	4.01206e-06	4.00897e-06	4.00906e-06	4.01294e-06	4.01213e-06
86633	4.01354e-06	4.01269e-06	4.02009e-06	4.00949e-06	4.0132e-06	4.01267e-06	4.00957e-06	4.00966e-06	4.01354e-06	4.01273e-06
86634	4.01414e-06	4.01329e-06	4.02069e-06	4.0101e-06	4.0138e-06	4.01327e-06	4.01017e-06	4.01026e-06	4.01415e-06	4.01333e-06
86635	4.01474e-06	4.0139e-06	4.0213e-06	4.0107e-06	4.0144e-06	4.01387e-06	4.01077e-06	4.01086e-06	4.01475e-06	4.01393e-06
86636	4.01534e-06	4.0145e-06	4.0219e-06	4.0113e-06	4.01501e-06	4.01447e-06	4.01137e-06	4.01146e-06	4.01535e-06	4.01453e-06
86637	4.01595e-06	4.0151e-06	4.0225e-06	4.0119e-06	4.01561e-06	4.01507e-06	4.01197e-06	4.01206e-06	4.01595e-06	4.01514e-06
86638	4.01655e-06	4.0157e-06	4.02311e-06	4.0125e-06	4.01621e-06	4.01568e-06	4.01258e-06	4.01267e-06	4.01656e-06	4.01574e-06
86639	4.01715e-06	4.0163e-06	4.02371e-06	4.0131e-06	4.01681e-06	4.01628e-06	4.01318e-06	4.01327e-06	4.01716e-06	4.01634e-06
86640	4.01775e-06	4.01691e-06	4.02431e-06	4.01371e-06	4.01742e-06	4.01688e-06	4.01378e-06	4.01387e-06	4.01776e-06	4.01694e-06
86641	4.01836e-06	4.01751e-06	4.02492e-06	4.01431e-06	4.01802e-06	4.01748e-06	4.01438e-06	4.01447e-06	4.01836e-06	4.01755e-06
86642	4.01896e-06	4.01811e-06	4.02552e-06	4.01491e-06	4.01862e-06	4.01809e-06	4.01498e-06	4.01507e-06	4.01897e-06	4.01815e-06
86643	4.01956e-06	4.01871e-06	4.02612e-06	4.01551e-06	4.01922e-06	4.01869e-06	4.01559e-06	4.01568e-06	4.01957e-06	4.01875e-06
86644	4.02017e-06	4.01932e-06	4.02673e-06	4.01611e-06	4.01983e-06	4.01929e-06	4.01619e-06	4.01628e-06	4.02017e-06	4.01935e-06
86645	4.02077e-06	4.01992e-06	4.02733e-06	4.01672e-06	4.02043e-06	4.0199e-06	4.01679e-06	4.01688e-06	4.02077e-06	4.01996e-06
86646	4.02137e-06	4.02052e-06	4.02794e-06	4.01732e-06	4.02103e-06	4.0205e-06	4.01739e-06	4.01748e-06	4.02138e-06	4.02056e-06
86647	4.02198e-06	4.02113e-06	4.02854e-06	4.01792e-06	4.02164e-06	4.0211e-06	4.018e-06	4.01809e-06	4.02198e-06	4.02116e-06
86648	4.02258e-06	4.02173e-06	4.02914e-06	4.01852e-06	4.02224e-06	4.0217e-06	4.0186e-06	4.01869e-06	4.02258e-06	4.02177e-06
86649	4.02318e-06	4.02233e-06	4.02975e-06	4.01913e-06	4.02284e-06	4.02231e-06	4.0192e-06	4.01929e-06	4.02319e-06	4.02237e-06
86650	4.02379e-06	4.02294e-06	4.03035e-06	4.01973e-06	4.02345e-06	4.02291e-06	4.01981e-06	4.01989e-06	4.02379e-06	4.02297e-06
86651	4.02439e-06	4.02354e-06	4.03096e-06	4.02033e-06	4.02405e-06	4.02352e-06	4.02041e-06	4.0205e-06	4.02439e-06	4.02358e-06
86652	4.02499e-06	4.02414e-06	4.03156e-06	4.02094e-06	4.02465e-06	4.02412e-06	4.02101e-06	4.0211e-06	4.025e-06	4.02418e-06
86653	4.0256e-06	4.02475e-06	4.03217e-06	4.02154e-06	4.02526e-06	4.02472e-06	4.02161e-06	4.0217e-06	4.0256e-06	4.02478e-06
86654	4.0262e-06	4.02535e-06	4.03277e-06	4.02214e-06	4.02586e-06	4.02533e-06	4.02222e-06	4.02231e-06	4.02621e-06	4.02539e-06
86655	4.0268e-06	4.02595e-06	4.03338e-06	4.02275e-06	4.02646e-06	4.02593e-06	4.02282e-06	4.02291e-06	4.02681e-06	4.02599e-06
86656	4.02741e-06	4.02656e-06	4.03398e-06	4.02335e-06	4.02707e-06	4.02653e-06	4.02342e-06	4.02351e-06	4.02741e-06	4.02659e-06
86657	4.02801e-06	4.02716e-06	4.03459e-06	4.02395e-06	4.02767e-06	4.02714e-06	4.02403e-06	4.02412e-06	4.02802e-06	4.0272e-06
86658	4.02862e-06	4.02777e-06	4.03519e-06	4.02456e-06	4.02828e-06	4.02774e-06	4.02463e-06	4.02472e-06	4.02862e-06	4.0278e-06
86659	4.02922e-06	4.02837e-06	4.0358e-06	4.02516e-06	4.02888e-06	4.02835e-06	4.02524e-06	4.02532e-06	4.02923e-06	4.02841e-06
86660	4.02983e-06	4.02897e-06	4.0364e-06	4.02576e-06	4.02948e-06	4.02895e-06	4.02584e-06	4.02593e-06	4.02983e-06	4.02901e-06
86661	4.03043e-06	4.02958e-06	4.03701e-06	4.02637e-06	4.03009e-06	4.02955e-06	4.02644e-06	4.02653e-06	4.03044e-06	4.02962e-06
86662	4.03103e-06	4.03018e-06	4.03761e-06	4.02697e-06	4.03069e-06	4.03016e-06	4.02705e-06	4.02714e-06	4.03104e-06	4.03022e-06
86663	4.03164e-06	4.03079e-06	4.03822e-06	4.02758e-06	4.0313e-06	4.03076e-06	4.02765e-06	4.02774e-06	4.03164e-06	4.03082e-06
86664	4.03224e-06	4.03139e-06	4.03883e-06	4.02818e-06	4.0319e-06	4.03137e-06	4.02826e-06	4.02834e-06	4.03225e-06	4.03143e-06
86665	4.03285e-06	4.032e-06	4.03943e-06	4.02878e-06	4.03251e-06	4.03197e-06	4.02886e-06	4.02895e-06	4.03285e-06	4.03203e-06
86666	4.03345e-06	4.0326e-06	4.04004e-06	4.02939e-06	4.03311e-06	4.03258e-06	4.02946e-06	4.02955e-06	4.03346e-06	4.03264e-06
86667	4.03406e-06	4.03321e-06	4.04064e-06	4.02999e-06	4.03372e-06	4.03318e-06	4.03007e-06	4.03016e-06	4.03406e-06	4.03324e-06
86668	4.03466e-06	4.03381e-06	4.04125e-06	4.0306e-06	4.03432e-06	4.03379e-06	4.03067e-06	4.03076e-06	4.03467e-06	4.03385e-06
86669	4.03527e-06	4.03442e-06	4.04186e-06	4.0312e-06	4.03493e-06	4.03439e-06	4.03128e-06	4.03137e-06	4.03527e-06	4.03445e-06
86670	4.03587e-06	4.03502e-06	4.04246e-06	4.03181e-06	4.03553e-06	4.035e-06	4.03188e-06	4.03197e-06	4.03588e-06	4.03506e-06
86671	4.03648e-06	4.03563e-06	4.04307e-06	4.03241e-06	4.03614e-06	4.0356e-06	4.03249e-06	4.03258e-06	4.03649e-06	4.03566e-06
86672	4.03709e-06	4.03623e-06	4.04368e-06	4.03302e-06	4.03674e-06	4.03621e-06	4.03309e-06	4.03318e-06	4.03709e-06	4.03627e-06
86673	4.03769e-06	4.03684e-06	4.04428e-06	4.03362e-06	4.03735e-06	4.03681e-06	4.0337e-06	4.03379e-06	4.0377e-06	4.03688e-06
86674	4.0383e-06	4.03744e-06	4.04489e-06	4.03423e-06	4.03796e-06	4.03742e-06	4.0343e-06	4.03439e-06	4.0383e-06	4.03748e-06
86675	4.0389e-06	4.03805e-06	4.0455e-06	4.03483e-06	4.03856e-06	4.03802e-06	4.03491e-06	4.035e-06	4.03891e-06	4.03809e-06
86676	4.03951e-06	4.03866e-06	4.0461e-06	4.03544e-06	4.03917e-06	4.03863e-06	4.03551e-06	4.0356e-06	4.03951e-06	4.03869e-06
86677	4.04011e-06	4.03926e-06	4.04671e-06	4.03604e-06	4.03977e-06	4.03924e-06	4.03612e-06	4.03621e-06	4.04012e-06	4.0393e-06
86678	4.04072e-06	4.03987e-06	4.04732e-06	4.03665e-06	4.04038e-06	4.03984e-06	4.03672e-06	4.03681e-06	4.04073e-06	4.0399e-06
86679	4.04133e-06	4.04047e-06	4.04792e-06	4.03725e-06	4.04098e-06	4.04045e-06	4.03733e-06	4.03742e-06	4.04133e-06	4.04051e-06
86680	4.04193e-06	4.04108e-06	4.04853e-06	4.03786e-06	4.04159e-06	4.04105e-06	4.03793e-06	4.03802e-06	4.04194e-06	4.04112e-06
86681	4.04254e-06	4.04169e-06	4.04914e-06	4.03846e-06	4.0422e-06	4.04166e-06	4.03854e-06	4.03863e-06	4.04254e-06	4.04172e-06
86682	4.04314e-06	4.04229e-06	4.04974e-06	4.03907e-06	4.0428e-06	4.04227e-06	4.03915e-06	4.03924e-06	4.04315e-06	4.04233e-06
86683	4.04375e-06	4.0429e-06	4.05035e-06	4.03968e-06	4.04341e-06	4.04287e-06	4.03975e-06	4.03984e-06	4.04376e-06	4.04293e-06
86684	4.04436e-06	4.0435e-06	4.05096e-06	4.04028e-06	4.04402e-06	4.04348e-06	4.04036e-06	4.04045e-06	4.04436e-06	4.04354e-06
86685	4.04496e-06	4.04411e-06	4.05157e-06	4.04089e-06	4.04462e-06	4.04409e-06	4.04096e-06	4.04105e-06	4.04497e-06	4.04415e-06
86686	4.04557e-06	4.04472e-06	4.05218e-06	4.04149e-06	4.04523e-06	4.04469e-06	4.04157e-06	4.04166e-06	4.04558e-06	4.04475e-06
86687	4.04618e-06	4.04532e-06	4.05278e-06	4.0421e-06	4.04584e-06	4.0453e-06	4.04218e-06	4.04227e-06	4.04618e-06	4.04536e-06
86688	4.04678e-06	4.04593e-06	4.05339e-06	4.04271e-06	4.04644e-06	4.04591e-06	4.04278e-06	4.04287e-06	4.04679e-06	4.04597e-06
86689	4.04739e-06	4.04654e-06	4.054e-06	4.04331e-06	4.04705e-06	4.04651e-06	4.04339e-06	4.04348e-06	4.0474e-06	4.04657e-06
86690	4.048e-06	4.04715e-06	4.05461e-06	4.04392e-06	4.04766e-06	4.04712e-06	4.044e-06	4.04408e-06	4.048e-06	4.04718e-06
86691	4.04861e-06	4.04775e-06	4.05522e-06	4.04453e-06	4.04826e-06	4.04773e-06	4.0446e-06	4.04469e-06	4.04861e-06	4.04779e-06
86692	4.04921e-06	4.04836e-06	4.05582e-06	4.04513e-06	4.04887e-06	4.04833e-06	4.04521e-06	4.0453e-06	4.04922e-06	4.0484e-06
86693	4.04982e-06	4.04897e-06	4.05643e-06	4.04574e-06	4.04948e-06	4.04894e-06	4.04582e-06	4.0459e-06	4.04983e-06	4.049e-06
86694	4.05043e-06	4.04957e-06	4.05704e-06	4.04635e-06	4.05009e-06	4.04955e-06	4.04642e-06	4.04651e-06	4.05043e-06	4.04961e-06
86695	4.05104e-06	4.05018e-06	4.05765e-06	4.04695e-06	4.05069e-06	4.05016e-06	4.04703e-06	4.04712e-06	4.05104e-06	4.05022e-06
86696	4.05164e-06	4.05079e-06	4.05826e-06	4.04756e-06	4.0513e-06	4.05076e-06	4.04764e-06	4.04773e-06	4.05165e-06	4.05083e-06
86697	4.05225e-06	4.0514e-06	4.05887e-06	4.04817e-06	4.05191e-06	4.05137e-06	4.04824e-06	4.04833e-06	4.05226e-06	4.05143e-06
86698	4.05286e-06	4.052e-06	4.05948e-06	4.04878e-06	4.05252e-06	4.05198e-06	4.04885e-06	4.04894e-06	4.05287e-06	4.05204e-06
86699	4.05347e-06	4.05261e-06	4.06008e-06	4.04938e-06	4.05312e-06	4.05259e-06	4.04946e-06	4.04955e-06	4.05347e-06	4.05265e-06
86700	4.05408e-06	4.05322e-06	4.06069e-06	4.04999e-06	4.05373e-06	4.05319e-06	4.05007e-06	4.05016e-06	4.05408e-06	4.05326e-06
86701	4.05468e-06	4.05383e-06	4.0613e-06	4.0506e-06	4.05434e-06	4.0538e-06	4.05067e-06	4.05076e-06	4.05469e-06	4.05386e-06
86702	4.05529e-06	4.05444e-06	4.06191e-06	4.05121e-06	4.05495e-06	4.05441e-06	4.05128e-06	4.05137e-06	4.0553e-06	4.05447e-06
86703	4.0559e-06	4.05504e-06	4.06252e-06	4.05181e-06	4.05556e-06	4.05502e-06	4.05189e-06	4.05198e-06	4.05591e-06	4.05508e-06
86704	4.05651e-06	4.05565e-06	4.06313e-06	4.05242e-06	4.05617e-06	4.05563e-06	4.0525e-06	4.05259e-06	4.05651e-06	4.05569e-06
86705	4.05712e-06	4.05626e-06	4.06374e-06	4.05303e-06	4.05677e-06	4.05624e-06	4.0531e-06	4.05319e-06	4.05712e-06	4.0563e-06
86706	4.05773e-06	4.05687e-06	4.06435e-06	4.05364e-06	4.05738e-06	4.05684e-06	4.05371e-06	4.0538e-06	4.05773e-06	4.05691e-06
86707	4.05833e-06	4.05748e-06	4.06496e-06	4.05424e-06	4.05799e-06	4.05745e-06	4.05432e-06	4.05441e-06	4.05834e-06	4.05751e-06
86708	4.05894e-06	4.05809e-06	4.06557e-06	4.05485e-06	4.0586e-06	4.05806e-06	4.05493e-06	4.05502e-06	4.05895e-06	4.05812e-06
86709	4.05955e-06	4.05869e-06	4.06618e-06	4.05546e-06	4.05921e-06	4.05867e-06	4.05554e-06	4.05563e-06	4.05956e-06	4.05873e-06
86710	4.06016e-06	4.0593e-06	4.06679e-06	4.05607e-06	4.05982e-06	4.05928e-06	4.05614e-06	4.05623e-06	4.06017e-06	4.05934e-06
86711	4.06077e-06	4.05991e-06	4.0674e-06	4.05668e-06	4.06043e-06	4.05989e-06	4.05675e-06	4.05684e-06	4.06078e-06	4.05995e-06
86712	4.06138e-06	4.06052e-06	4.06801e-06	4.05729e-06	4.06104e-06	4.0605e-06	4.05736e-06	4.05745e-06	4.06138e-06	4.06056e-06
86713	4.06199e-06	4.06113e-06	4.06862e-06	4.05789e-06	4.06164e-06	4.06111e-06	4.05797e-06	4.05806e-06	4.06199e-06	4.06117e-06
86714	4.0626e-06	4.06174e-06	4.06923e-06	4.0585e-06	4.06225e-06	4.06171e-06	4.05858e-06	4.05867e-06	4.0626e-06	4.06178e-06
86715	4.06321e-06	4.06235e-06	4.06984e-06	4.05911e-06	4.06286e-06	4.06232e-06	4.05919e-06	4.05928e-06	4.06321e-06	4.06239e-06
86716	4.06382e-06	4.06296e-06	4.07045e-06	4.05972e-06	4.06347e-06	4.06293e-06	4.0598e-06	4.05989e-06	4.06382e-06	4.063e-06
86717	4.06443e-06	4.06357e-06	4.07106e-06	4.06033e-06	4.06408e-06	4.06354e-06	4.06041e-06	4.0605e-06	4.06443e-06	4.0636e-06
86718	4.06504e-06	4.06418e-06	4.07167e-06	4.06094e-06	4.06469e-06	4.06415e-06	4.06101e-06	4.0611e-06	4.06504e-06	4.06421e-06
86719	4.06564e-06	4.06479e-06	4.07228e-06	4.06155e-06	4.0653e-06	4.06476e-06	4.06162e-06	4.06171e-06	4.06565e-06	4.06482e-06
86720	4.06625e-06	4.0654e-06	4.07289e-06	4.06216e-06	4.06591e-06	4.06537e-06	4.06223e-06	4.06232e-06	4.06626e-06	4.06543e-06
86721	4.06686e-06	4.06601e-06	4.0735e-06	4.06277e-06	4.06652e-06	4.06598e-06	4.06284e-06	4.06293e-06	4.06687e-06	4.06604e-06
86722	4.06747e-06	4.06662e-06	4.07411e-06	4.06338e-06	4.06713e-06	4.06659e-06	4.06345e-06	4.06354e-06	4.06748e-06	4.06665e-06
86723	4.06808e-06	4.06723e-06	4.07473e-06	4.06399e-06	4.06774e-06	4.0672e-06	4.06406e-06	4.06415e-06	4.06809e-06	4.06726e-06
86724	4.06869e-06	4.06784e-06	4.07534e-06	4.0646e-06	4.06835e-06	4.06781e-06	4.06467e-06	4.06476e-06	4.0687e-06	4.06787e-06
86725	4.06931e-06	4.06845e-06	4.07595e-06	4.0652e-06	4.06896e-06	4.06842e-06	4.06528e-06	4.06537e-06	4.06931e-06	4.06848e-06
86726	4.06992e-06	4.06906e-06	4.07656e-06	4.06581e-06	4.06957e-06	4.06903e-06	4.06589e-06	4.06598e-06	4.06992e-06	4.06909e-06
86727	4.07053e-06	4.06967e-06	4.07717e-06	4.06642e-06	4.07018e-06	4.06964e-06	4.0665e-06	4.06659e-06	4.07053e-06	4.0697e-06
86728	4.07114e-06	4.07028e-06	4.07778e-06	4.06703e-06	4.07079e-06	4.07025e-06	4.06711e-06	4.0672e-06	4.07114e-06	4.07031e-06
86729	4.07175e-06	4.07089e-06	4.07839e-06	4.06764e-06	4.0714e-06	4.07086e-06	4.06772e-06	4.06781e-06	4.07175e-06	4.07093e-06
86730	4.07236e-06	4.0715e-06	4.07901e-06	4.06825e-06	4.07201e-06	4.07147e-06	4.06833e-06	4.06842e-06	4.07236e-06	4.07154e-06
86731	4.07297e-06	4.07211e-06	4.07962e-06	4.06886e-06	4.07262e-06	4.07208e-06	4.06894e-06	4.06903e-06	4.07297e-06	4.07215e-06
86732	4.07358e-06	4.07272e-06	4.08023e-06	4.06948e-06	4.07324e-06	4.0727e-06	4.06955e-06	4.06964e-06	4.07359e-06	4.07276e-06
86733	4.07419e-06	4.07333e-06	4.08084e-06	4.07009e-06	4.07385e-06	4.07331e-06	4.07016e-06	4.07025e-06	4.0742e-06	4.07337e-06
86734	4.0748e-06	4.07394e-06	4.08145e-06	4.0707e-06	4.07446e-06	4.07392e-06	4.07077e-06	4.07086e-06	4.07481e-06	4.07398e-06
86735	4.07541e-06	4.07455e-06	4.08207e-06	4.07131e-06	4.07507e-06	4.07453e-06	4.07138e-06	4.07147e-06	4.07542e-06	4.07459e-06
86736	4.07602e-06	4.07516e-06	4.08268e-06	4.07192e-06	4.07568e-06	4.07514e-06	4.07199e-06	4.07208e-06	4.07603e-06	4.0752e-06
86737	4.07664e-06	4.07578e-06	4.08329e-06	4.07253e-06	4.07629e-06	4.07575e-06	4.0726e-06	4.07269e-06	4.07664e-06	4.07581e-06
86738	4.07725e-06	4.07639e-06	4.0839e-06	4.07314e-06	4.0769e-06	4.07636e-06	4.07321e-06	4.0733e-06	4.07725e-06	4.07642e-06
86739	4.07786e-06	4.077e-06	4.08452e-06	4.07375e-06	4.07751e-06	4.07697e-06	4.07383e-06	4.07392e-06	4.07786e-06	4.07704e-06
86740	4.07847e-06	4.07761e-06	4.08513e-06	4.07436e-06	4.07813e-06	4.07758e-06	4.07444e-06	4.07453e-06	4.07848e-06	4.07765e-06
86741	4.07908e-06	4.07822e-06	4.08574e-06	4.07497e-06	4.07874e-06	4.0782e-06	4.07505e-06	4.07514e-06	4.07909e-06	4.07826e-06
86742	4.07969e-06	4.07883e-06	4.08635e-06	4.07558e-06	4.07935e-06	4.07881e-06	4.07566e-06	4.07575e-06	4.0797e-06	4.07887e-06
86743	4.08031e-06	4.07945e-06	4.08697e-06	4.07619e-06	4.07996e-06	4.07942e-06	4.07627e-06	4.07636e-06	4.08031e-06	4.07948e-06
86744	4.08092e-06	4.08006e-06	4.08758e-06	4.07681e-06	4.08057e-06	4.08003e-06	4.07688e-06	4.07697e-06	4.08092e-06	4.08009e-06
86745	4.08153e-06	4.08067e-06	4.08819e-06	4.07742e-06	4.08119e-06	4.08064e-06	4.07749e-06	4.07758e-06	4.08154e-06	4.08071e-06
86746	4.08214e-06	4.08128e-06	4.08881e-06	4.07803e-06	4.0818e-06	4.08126e-06	4.07811e-06	4.0782e-06	4.08215e-06	4.08132e-06
86747	4.08275e-06	4.08189e-06	4.08942e-06	4.07864e-06	4.08241e-06	4.08187e-06	4.07872e-06	4.07881e-06	4.08276e-06	4.08193e-06
86748	4.08337e-06	4.08251e-06	4.09003e-06	4.07925e-06	4.08302e-06	4.08248e-06	4.07933e-06	4.07942e-06	4.08337e-06	4.08254e-06
86749	4.08398e-06	4.08312e-06	4.09065e-06	4.07986e-06	4.08363e-06	4.08309e-06	4.07994e-06	4.08003e-06	4.08399e-06	4.08316e-06
86750	4.08459e-06	4.08373e-06	4.09126e-06	4.08048e-06	4.08425e-06	4.08371e-06	4.08055e-06	4.08064e-06	4.0846e-06	4.08377e-06
86751	4.0852e-06	4.08434e-06	4.09187e-06	4.08109e-06	4.08486e-06	4.08432e-06	4.08116e-06	4.08125e-06	4.08521e-06	4.08438e-06
86752	4.08582e-06	4.08496e-06	4.09249e-06	4.0817e-06	4.08547e-06	4.08493e-06	4.08178e-06	4.08187e-06	4.08582e-06	4.08499e-06
86753	4.08643e-06	4.08557e-06	4.0931e-06	4.08231e-06	4.08609e-06	4.08554e-06	4.08239e-06	4.08248e-06	4.08644e-06	4.08561e-06
86754	4.08704e-06	4.08618e-06	4.09371e-06	4.08293e-06	4.0867e-06	4.08616e-06	4.083e-06	4.08309e-06	4.08705e-06	4.08622e-06
86755	4.08766e-06	4.08679e-06	4.09433e-06	4.08354e-06	4.08731e-06	4.08677e-06	4.08361e-06	4.0837e-06	4.08766e-06	4.08683e-06
86756	4.08827e-06	4.08741e-06	4.09494e-06	4.08415e-06	4.08792e-06	4.08738e-06	4.08423e-06	4.08432e-06	4.08828e-06	4.08744e-06
86757	4.08888e-06	4.08802e-06	4.09556e-06	4.08476e-06	4.08854e-06	4.08799e-06	4.08484e-06	4.08493e-06	4.08889e-06	4.08806e-06
86758	4.0895e-06	4.08863e-06	4.09617e-06	4.08538e-06	4.08915e-06	4.08861e-06	4.08545e-06	4.08554e-06	4.0895e-06	4.08867e-06
86759	4.09011e-06	4.08925e-06	4.09679e-06	4.08599e-06	4.08976e-06	4.08922e-06	4.08606e-06	4.08615e-06	4.09012e-06	4.08928e-06
86760	4.09072e-06	4.08986e-06	4.0974e-06	4.0866e-06	4.09038e-06	4.08983e-06	4.08668e-06	4.08677e-06	4.09073e-06	4.0899e-06
86761	4.09134e-06	4.09047e-06	4.09801e-06	4.08721e-06	4.09099e-06	4.09045e-06	4.08729e-06	4.08738e-06	4.09134e-06	4.09051e-06
86762	4.09195e-06	4.09109e-06	4.09863e-06	4.08783e-06	4.0916e-06	4.09106e-06	4.0879e-06	4.08799e-06	4.09196e-06	4.09112e-06
86763	4.09256e-06	4.0917e-06	4.09924e-06	4.08844e-06	4.09222e-06	4.09168e-06	4.08852e-06	4.08861e-06	4.09257e-06	4.09174e-06
86764	4.09318e-06	4.09231e-06	4.09986e-06	4.08905e-06	4.09283e-06	4.09229e-06	4.08913e-06	4.08922e-06	4.09318e-06	4.09235e-06
86765	4.09379e-06	4.09293e-06	4.10047e-06	4.08967e-06	4.09345e-06	4.0929e-06	4.08974e-06	4.08983e-06	4.0938e-06	4.09297e-06
86766	4.09441e-06	4.09354e-06	4.10109e-06	4.09028e-06	4.09406e-06	4.09352e-06	4.09036e-06	4.09045e-06	4.09441e-06	4.09358e-06
86767	4.09502e-06	4.09416e-06	4.1017e-06	4.09089e-06	4.09467e-06	4.09413e-06	4.09097e-06	4.09106e-06	4.09503e-06	4.09419e-06
86768	4.09563e-06	4.09477e-06	4.10232e-06	4.09151e-06	4.09529e-06	4.09474e-06	4.09158e-06	4.09167e-06	4.09564e-06	4.09481e-06
86769	4.09625e-06	4.09538e-06	4.10293e-06	4.09212e-06	4.0959e-06	4.09536e-06	4.0922e-06	4.09229e-06	4.09625e-06	4.09542e-06
86770	4.09686e-06	4.096e-06	4.10355e-06	4.09273e-06	4.09652e-06	4.09597e-06	4.09281e-06	4.0929e-06	4.09687e-06	4.09604e-06
86771	4.09748e-06	4.09661e-06	4.10417e-06	4.09335e-06	4.09713e-06	4.09659e-06	4.09343e-06	4.09352e-06	4.09748e-06	4.09665e-06
86772	4.09809e-06	4.09723e-06	4.10478e-06	4.09396e-06	4.09775e-06	4.0972e-06	4.09404e-06	4.09413e-06	4.0981e-06	4.09726e-06
86773	4.09871e-06	4.09784e-06	4.1054e-06	4.09458e-06	4.09836e-06	4.09782e-06	4.09465e-06	4.09474e-06	4.09871e-06	4.09788e-06
86774	4.09932e-06	4.09846e-06	4.10601e-06	4.09519e-06	4.09898e-06	4.09843e-06	4.09527e-06	4.09536e-06	4.09933e-06	4.09849e-06
86775	4.09994e-06	4.09907e-06	4.10663e-06	4.09581e-06	4.09959e-06	4.09905e-06	4.09588e-06	4.09597e-06	4.09994e-06	4.09911e-06
86776	4.10055e-06	4.09969e-06	4.10724e-06	4.09642e-06	4.10021e-06	4.09966e-06	4.0965e-06	4.09659e-06	4.10056e-06	4.09972e-06
86777	4.10117e-06	4.1003e-06	4.10786e-06	4.09703e-06	4.10082e-06	4.10028e-06	4.09711e-06	4.0972e-06	4.10117e-06	4.10034e-06
86778	4.10178e-06	4.10092e-06	4.10848e-06	4.09765e-06	4.10144e-06	4.10089e-06	4.09772e-06	4.09782e-06	4.10179e-06	4.10095e-06
86779	4.1024e-06	4.10153e-06	4.10909e-06	4.09826e-06	4.10205e-06	4.10151e-06	4.09834e-06	4.09843e-06	4.1024e-06	4.10157e-06
86780	4.10301e-06	4.10215e-06	4.10971e-06	4.09888e-06	4.10267e-06	4.10212e-06	4.09895e-06	4.09904e-06	4.10302e-06	4.10218e-06
86781	4.10363e-06	4.10276e-06	4.11033e-06	4.09949e-06	4.10328e-06	4.10274e-06	4.09957e-06	4.09966e-06	4.10363e-06	4.1028e-06
86782	4.10424e-06	4.10338e-06	4.11094e-06	4.10011e-06	4.1039e-06	4.10335e-06	4.10018e-06	4.10027e-06	4.10425e-06	4.10341e-06
86783	4.10486e-06	4.10399e-06	4.11156e-06	4.10072e-06	4.10451e-06	4.10397e-06	4.1008e-06	4.10089e-06	4.10486e-06	4.10403e-06
86784	4.10547e-06	4.10461e-06	4.11218e-06	4.10134e-06	4.10513e-06	4.10458e-06	4.10141e-06	4.1015e-06	4.10548e-06	4.10465e-06
86785	4.10609e-06	4.10522e-06	4.11279e-06	4.10195e-06	4.10574e-06	4.1052e-06	4.10203e-06	4.10212e-06	4.1061e-06	4.10526e-06
86786	4.10671e-06	4.10584e-06	4.11341e-06	4.10257e-06	4.10636e-06	4.10581e-06	4.10264e-06	4.10274e-06	4.10671e-06	4.10588e-06
86787	4.10732e-06	4.10646e-06	4.11403e-06	4.10318e-06	4.10698e-06	4.10643e-06	4.10326e-06	4.10335e-06	4.10733e-06	4.10649e-06
86788	4.10794e-06	4.10707e-06	4.11464e-06	4.1038e-06	4.10759e-06	4.10705e-06	4.10388e-06	4.10397e-06	4.10794e-06	4.10711e-06
86789	4.10855e-06	4.10769e-06	4.11526e-06	4.10441e-06	4.10821e-06	4.10766e-06	4.10449e-06	4.10458e-06	4.10856e-06	4.10772e-06
86790	4.10917e-06	4.1083e-06	4.11588e-06	4.10503e-06	4.10882e-06	4.10828e-06	4.10511e-06	4.1052e-06	4.10918e-06	4.10834e-06
86791	4.10979e-06	4.10892e-06	4.1165e-06	4.10565e-06	4.10944e-06	4.10889e-06	4.10572e-06	4.10581e-06	4.10979e-06	4.10896e-06
86792	4.1104e-06	4.10954e-06	4.11711e-06	4.10626e-06	4.11006e-06	4.10951e-06	4.10634e-06	4.10643e-06	4.11041e-06	4.10957e-06
86793	4.11102e-06	4.11015e-06	4.11773e-06	4.10688e-06	4.11067e-06	4.11013e-06	4.10695e-06	4.10704e-06	4.11103e-06	4.11019e-06
86794	4.11164e-06	4.11077e-06	4.11835e-06	4.10749e-06	4.11129e-06	4.11074e-06	4.10757e-06	4.10766e-06	4.11164e-06	4.11081e-06
86795	4.11225e-06	4.11139e-06	4.11897e-06	4.10811e-06	4.11191e-06	4.11136e-06	4.10819e-06	4.10828e-06	4.11226e-06	4.11142e-06
86796	4.11287e-06	4.112e-06	4.11958e-06	4.10873e-06	4.11252e-06	4.11198e-06	4.1088e-06	4.10889e-06	4.11288e-06	4.11204e-06
86797	4.11349e-06	4.11262e-06	4.1202e-06	4.10934e-06	4.11314e-06	4.11259e-06	4.10942e-06	4.10951e-06	4.11349e-06	4.11266e-06
86798	4.1141e-06	4.11324e-06	4.12082e-06	4.10996e-06	4.11376e-06	4.11321e-06	4.11003e-06	4.11013e-06	4.11411e-06	4.11327e-06
86799	4.11472e-06	4.11385e-06	4.12144e-06	4.11057e-06	4.11437e-06	4.11383e-06	4.11065e-06	4.11074e-06	4.11473e-06	4.11389e-06
86800	4.11534e-06	4.11447e-06	4.12206e-06	4.11119e-06	4.11499e-06	4.11444e-06	4.11127e-06	4.11136e-06	4.11534e-06	4.11451e-06
86801	4.11596e-06	4.11509e-06	4.12267e-06	4.11181e-06	4.11561e-06	4.11506e-06	4.11188e-06	4.11198e-06	4.11596e-06	4.11512e-06
86802	4.11657e-06	4.1157e-06	4.12329e-06	4.11242e-06	4.11623e-06	4.11568e-06	4.1125e-06	4.11259e-06	4.11658e-06	4.11574e-06
86803	4.11719e-06	4.11632e-06	4.12391e-06	4.11304e-06	4.11684e-06	4.1163e-06	4.11312e-06	4.11321e-06	4.1172e-06	4.11636e-06
86804	4.11781e-06	4.11694e-06	4.12453e-06	4.11366e-06	4.11746e-06	4.11691e-06	4.11374e-06	4.11383e-06	4.11781e-06	4.11698e-06
86805	4.11843e-06	4.11756e-06	4.12515e-06	4.11428e-06	4.11808e-06	4.11753e-06	4.11435e-06	4.11444e-06	4.11843e-06	4.11759e-06
86806	4.11904e-06	4.11817e-06	4.12577e-06	4.11489e-06	4.1187e-06	4.11815e-06	4.11497e-06	4.11506e-06	4.11905e-06	4.11821e-06
86807	4.11966e-06	4.11879e-06	4.12639e-06	4.11551e-06	4.11931e-06	4.11877e-06	4.11559e-06	4.11568e-06	4.11967e-06	4.11883e-06
86808	4.12028e-06	4.11941e-06	4.127e-06	4.11613e-06	4.11993e-06	4.11938e-06	4.1162e-06	4.11629e-06	4.12028e-06	4.11945e-06
86809	4.1209e-06	4.12003e-06	4.12762e-06	4.11674e-06	4.12055e-06	4.12e-06	4.11682e-06	4.11691e-06	4.1209e-06	4.12006e-06
86810	4.12151e-06	4.12065e-06	4.12824e-06	4.11736e-06	4.12117e-06	4.12062e-06	4.11744e-06	4.11753e-06	4.12152e-06	4.12068e-06
86811	4.12213e-06	4.12126e-06	4.12886e-06	4.11798e-06	4.12178e-06	4.12124e-06	4.11806e-06	4.11815e-06	4.12214e-06	4.1213e-06
86812	4.12275e-06	4.12188e-06	4.12948e-06	4.1186e-06	4.1224e-06	4.12186e-06	4.11867e-06	4.11877e-06	4.12276e-06	4.12192e-06
86813	4.12337e-06	4.1225e-06	4.1301e-06	4.11921e-06	4.12302e-06	4.12247e-06	4.11929e-06	4.11938e-06	4.12338e-06	4.12254e-06
86814	4.12399e-06	4.12312e-06	4.13072e-06	4.11983e-06	4.12364e-06	4.12309e-06	4.11991e-06	4.12e-06	4.12399e-06	4.12316e-06
86815	4.12461e-06	4.12374e-06	4.13134e-06	4.12045e-06	4.12426e-06	4.12371e-06	4.12053e-06	4.12062e-06	4.12461e-06	4.12377e-06
86816	4.12523e-06	4.12435e-06	4.13196e-06	4.12107e-06	4.12488e-06	4.12433e-06	4.12115e-06	4.12124e-06	4.12523e-06	4.12439e-06
86817	4.12584e-06	4.12497e-06	4.13258e-06	4.12169e-06	4.1255e-06	4.12495e-06	4.12176e-06	4.12185e-06	4.12585e-06	4.12501e-06
86818	4.12646e-06	4.12559e-06	4.1332e-06	4.1223e-06	4.12611e-06	4.12557e-06	4.12238e-06	4.12247e-06	4.12647e-06	4.12563e-06
86819	4.12708e-06	4.12621e-06	4.13382e-06	4.12292e-06	4.12673e-06	4.12619e-06	4.123e-06	4.12309e-06	4.12709e-06	4.12625e-06
86820	4.1277e-06	4.12683e-06	4.13444e-06	4.12354e-06	4.12735e-06	4.1268e-06	4.12362e-06	4.12371e-06	4.12771e-06	4.12687e-06
86821	4.12832e-06	4.12745e-06	4.13506e-06	4.12416e-06	4.12797e-06	4.12742e-06	4.12424e-06	4.12433e-06	4.12833e-06	4.12749e-06
86822	4.12894e-06	4.12807e-06	4.13568e-06	4.12478e-06	4.12859e-06	4.12804e-06	4.12486e-06	4.12495e-06	4.12894e-06	4.12811e-06
86823	4.12956e-06	4.12869e-06	4.1363e-06	4.1254e-06	4.12921e-06	4.12866e-06	4.12547e-06	4.12557e-06	4.12956e-06	4.12872e-06
86824	4.13018e-06	4.12931e-06	4.13692e-06	4.12602e-06	4.12983e-06	4.12928e-06	4.12609e-06	4.12618e-06	4.13018e-06	4.12934e-06
86825	4.1308e-06	4.12993e-06	4.13754e-06	4.12663e-06	4.13045e-06	4.1299e-06	4.12671e-06	4.1268e-06	4.1308e-06	4.12996e-06
86826	4.13142e-06	4.13055e-06	4.13816e-06	4.12725e-06	4.13107e-06	4.13052e-06	4.12733e-06	4.12742e-06	4.13142e-06	4.13058e-06
86827	4.13204e-06	4.13116e-06	4.13878e-06	4.12787e-06	4.13169e-06	4.13114e-06	4.12795e-06	4.12804e-06	4.13204e-06	4.1312e-06
86828	4.13266e-06	4.13178e-06	4.1394e-06	4.12849e-06	4.13231e-06	4.13176e-06	4.12857e-06	4.12866e-06	4.13266e-06	4.13182e-06
86829	4.13328e-06	4.1324e-06	4.14002e-06	4.12911e-06	4.13293e-06	4.13238e-06	4.12919e-06	4.12928e-06	4.13328e-06	4.13244e-06
86830	4.1339e-06	4.13302e-06	4.14064e-06	4.12973e-06	4.13355e-06	4.133e-06	4.12981e-06	4.1299e-06	4.1339e-06	4.13306e-06
86831	4.13452e-06	4.13364e-06	4.14126e-06	4.13035e-06	4.13417e-06	4.13362e-06	4.13043e-06	4.13052e-06	4.13452e-06	4.13368e-06
86832	4.13514e-06	4.13426e-06	4.14189e-06	4.13097e-06	4.13479e-06	4.13424e-06	4.13105e-06	4.13114e-06	4.13514e-06	4.1343e-06
86833	4.13576e-06	4.13488e-06	4.14251e-06	4.13159e-06	4.13541e-06	4.13486e-06	4.13167e-06	4.13176e-06	4.13576e-06	4.13492e-06
86834	4.13638e-06	4.1355e-06	4.14313e-06	4.13221e-06	4.13603e-06	4.13548e-06	4.13229e-06	4.13238e-06	4.13638e-06	4.13554e-06
86835	4.137e-06	4.13612e-06	4.14375e-06	4.13283e-06	4.13665e-06	4.1361e-06	4.13291e-06	4.133e-06	4.137e-06	4.13616e-06
86836	4.13762e-06	4.13674e-06	4.14437e-06	4.13345e-06	4.13727e-06	4.13672e-06	4.13353e-06	4.13362e-06	4.13762e-06	4.13678e-06
86837	4.13824e-06	4.13736e-06	4.14499e-06	4.13407e-06	4.13789e-06	4.13734e-06	4.13415e-06	4.13424e-06	4.13824e-06	4.1374e-06
86838	4.13886e-06	4.13799e-06	4.14561e-06	4.13469e-06	4.13851e-06	4.13796e-06	4.13477e-06	4.13486e-06	4.13886e-06	4.13802e-06
86839	4.13948e-06	4.13861e-06	4.14624e-06	4.13531e-06	4.13913e-06	4.13858e-06	4.13539e-06	4.13548e-06	4.13949e-06	4.13864e-06
86840	4.1401e-06	4.13923e-06	4.14686e-06	4.13593e-06	4.13975e-06	4.1392e-06	4.13601e-06	4.1361e-06	4.14011e-06	4.13926e-06
86841	4.14072e-06	4.13985e-06	4.14748e-06	4.13655e-06	4.14037e-06	4.13982e-06	4.13663e-06	4.13672e-06	4.14073e-06	4.13989e-06
86842	4.14134e-06	4.14047e-06	4.1481e-06	4.13717e-06	4.14099e-06	4.14044e-06	4.13725e-06	4.13734e-06	4.14135e-06	4.14051e-06
86843	4.14196e-06	4.14109e-06	4.14872e-06	4.13779e-06	4.14161e-06	4.14106e-06	4.13787e-06	4.13796e-06	4.14197e-06	4.14113e-06
86844	4.14258e-06	4.14171e-06	4.14935e-06	4.13841e-06	4.14223e-06	4.14169e-06	4.13849e-06	4.13858e-06	4.14259e-06	4.14175e-06
86845	4.14321e-06	4.14233e-06	4.14997e-06	4.13903e-06	4.14286e-06	4.14231e-06	4.13911e-06	4.1392e-06	4.14321e-06	4.14237e-06
86846	4.14383e-06	4.14295e-06	4.15059e-06	4.13965e-06	4.14348e-06	4.14293e-06	4.13973e-06	4.13982e-06	4.14383e-06	4.14299e-06
86847	4.14445e-06	4.14357e-06	4.15121e-06	4.14027e-06	4.1441e-06	4.14355e-06	4.14035e-06	4.14044e-06	4.14445e-06	4.14361e-06
86848	4.14507e-06	4.1442e-06	4.15184e-06	4.14089e-06	4.14472e-06	4.14417e-06	4.14097e-06	4.14106e-06	4.14508e-06	4.14423e-06
86849	4.14569e-06	4.14482e-06	4.15246e-06	4.14152e-06	4.14534e-06	4.14479e-06	4.14159e-06	4.14168e-06	4.1457e-06	4.14486e-06
86850	4.14631e-06	4.14544e-06	4.15308e-06	4.14214e-06	4.14596e-06	4.14541e-06	4.14221e-06	4.14231e-06	4.14632e-06	4.14548e-06
86851	4.14694e-06	4.14606e-06	4.1537e-06	4.14276e-06	4.14659e-06	4.14604e-06	4.14283e-06	4.14293e-06	4.14694e-06	4.1461e-06
86852	4.14756e-06	4.14668e-06	4.15433e-06	4.14338e-06	4.14721e-06	4.14666e-06	4.14346e-06	4.14355e-06	4.14756e-06	4.14672e-06
86853	4.14818e-06	4.1473e-06	4.15495e-06	4.144e-06	4.14783e-06	4.14728e-06	4.14408e-06	4.14417e-06	4.14819e-06	4.14734e-06
86854	4.1488e-06	4.14793e-06	4.15557e-06	4.14462e-06	4.14845e-06	4.1479e-06	4.1447e-06	4.14479e-06	4.14881e-06	4.14796e-06
86855	4.14942e-06	4.14855e-06	4.1562e-06	4.14524e-06	4.14907e-06	4.14852e-06	4.14532e-06	4.14541e-06	4.14943e-06	4.14859e-06
86856	4.15005e-06	4.14917e-06	4.15682e-06	4.14587e-06	4.1497e-06	4.14915e-06	4.14594e-06	4.14603e-06	4.15005e-06	4.14921e-06
86857	4.15067e-06	4.14979e-06	4.15744e-06	4.14649e-06	4.15032e-06	4.14977e-06	4.14656e-06	4.14666e-06	4.15067e-06	4.14983e-06
86858	4.15129e-06	4.15042e-06	4.15807e-06	4.14711e-06	4.15094e-06	4.15039e-06	4.14719e-06	4.14728e-06	4.1513e-06	4.15045e-06
86859	4.15191e-06	4.15104e-06	4.15869e-06	4.14773e-06	4.15156e-06	4.15101e-06	4.14781e-06	4.1479e-06	4.15192e-06	4.15108e-06
86860	4.15254e-06	4.15166e-06	4.15931e-06	4.14835e-06	4.15219e-06	4.15164e-06	4.14843e-06	4.14852e-06	4.15254e-06	4.1517e-06
86861	4.15316e-06	4.15228e-06	4.15994e-06	4.14898e-06	4.15281e-06	4.15226e-06	4.14905e-06	4.14914e-06	4.15317e-06	4.15232e-06
86862	4.15378e-06	4.15291e-06	4.16056e-06	4.1496e-06	4.15343e-06	4.15288e-06	4.14967e-06	4.14977e-06	4.15379e-06	4.15294e-06
86863	4.15441e-06	4.15353e-06	4.16119e-06	4.15022e-06	4.15405e-06	4.1535e-06	4.1503e-06	4.15039e-06	4.15441e-06	4.15357e-06
86864	4.15503e-06	4.15415e-06	4.16181e-06	4.15084e-06	4.15468e-06	4.15413e-06	4.15092e-06	4.15101e-06	4.15503e-06	4.15419e-06
86865	4.15565e-06	4.15478e-06	4.16243e-06	4.15146e-06	4.1553e-06	4.15475e-06	4.15154e-06	4.15163e-06	4.15566e-06	4.15481e-06
86866	4.15627e-06	4.1554e-06	4.16306e-06	4.15209e-06	4.15592e-06	4.15537e-06	4.15216e-06	4.15226e-06	4.15628e-06	4.15544e-06
86867	4.1569e-06	4.15602e-06	4.16368e-06	4.15271e-06	4.15655e-06	4.156e-06	4.15279e-06	4.15288e-06	4.1569e-06	4.15606e-06
86868	4.15752e-06	4.15664e-06	4.16431e-06	4.15333e-06	4.15717e-06	4.15662e-06	4.15341e-06	4.1535e-06	4.15753e-06	4.15668e-06
86869	4.15815e-06	4.15727e-06	4.16493e-06	4.15396e-06	4.15779e-06	4.15724e-06	4.15403e-06	4.15413e-06	4.15815e-06	4.15731e-06
86870	4.15877e-06	4.15789e-06	4.16556e-06	4.15458e-06	4.15842e-06	4.15787e-06	4.15466e-06	4.15475e-06	4.15877e-06	4.15793e-06
86871	4.15939e-06	4.15852e-06	4.16618e-06	4.1552e-06	4.15904e-06	4.15849e-06	4.15528e-06	4.15537e-06	4.1594e-06	4.15855e-06
86872	4.16002e-06	4.15914e-06	4.16681e-06	4.15583e-06	4.15967e-06	4.15911e-06	4.1559e-06	4.15599e-06	4.16002e-06	4.15918e-06
86873	4.16064e-06	4.15976e-06	4.16743e-06	4.15645e-06	4.16029e-06	4.15974e-06	4.15653e-06	4.15662e-06	4.16065e-06	4.1598e-06
86874	4.16126e-06	4.16039e-06	4.16806e-06	4.15707e-06	4.16091e-06	4.16036e-06	4.15715e-06	4.15724e-06	4.16127e-06	4.16042e-06
86875	4.16189e-06	4.16101e-06	4.16868e-06	4.1577e-06	4.16154e-06	4.16098e-06	4.15777e-06	4.15786e-06	4.16189e-06	4.16105e-06
86876	4.16251e-06	4.16163e-06	4.16931e-06	4.15832e-06	4.16216e-06	4.16161e-06	4.1584e-06	4.15849e-06	4.16252e-06	4.16167e-06
86877	4.16314e-06	4.16226e-06	4.16993e-06	4.15894e-06	4.16279e-06	4.16223e-06	4.15902e-06	4.15911e-06	4.16314e-06	4.1623e-06
86878	4.16376e-06	4.16288e-06	4.17056e-06	4.15957e-06	4.16341e-06	4.16286e-06	4.15964e-06	4.15974e-06	4.16377e-06	4.16292e-06
86879	4.16439e-06	4.16351e-06	4.17118e-06	4.16019e-06	4.16403e-06	4.16348e-06	4.16027e-06	4.16036e-06	4.16439e-06	4.16354e-06
86880	4.16501e-06	4.16413e-06	4.17181e-06	4.16081e-06	4.16466e-06	4.16411e-06	4.16089e-06	4.16098e-06	4.16502e-06	4.16417e-06
86881	4.16563e-06	4.16476e-06	4.17243e-06	4.16144e-06	4.16528e-06	4.16473e-06	4.16152e-06	4.16161e-06	4.16564e-06	4.16479e-06
86882	4.16626e-06	4.16538e-06	4.17306e-06	4.16206e-06	4.16591e-06	4.16536e-06	4.16214e-06	4.16223e-06	4.16627e-06	4.16542e-06
86883	4.16688e-06	4.16601e-06	4.17369e-06	4.16269e-06	4.16653e-06	4.16598e-06	4.16276e-06	4.16286e-06	4.16689e-06	4.16604e-06
86884	4.16751e-06	4.16663e-06	4.17431e-06	4.16331e-06	4.16716e-06	4.1666e-06	4.16339e-06	4.16348e-06	4.16752e-06	4.16667e-06
86885	4.16813e-06	4.16726e-06	4.17494e-06	4.16393e-06	4.16778e-06	4.16723e-06	4.16401e-06	4.1641e-06	4.16814e-06	4.16729e-06
86886	4.16876e-06	4.16788e-06	4.17556e-06	4.16456e-06	4.16841e-06	4.16785e-06	4.16464e-06	4.16473e-06	4.16877e-06	4.16792e-06
86887	4.16938e-06	4.16851e-06	4.17619e-06	4.16518e-06	4.16903e-06	4.16848e-06	4.16526e-06	4.16535e-06	4.16939e-06	4.16854e-06
86888	4.17001e-06	4.16913e-06	4.17682e-06	4.16581e-06	4.16966e-06	4.1691e-06	4.16589e-06	4.16598e-06	4.17002e-06	4.16917e-06
86889	4.17064e-06	4.16976e-06	4.17744e-06	4.16643e-06	4.17028e-06	4.16973e-06	4.16651e-06	4.1666e-06	4.17064e-06	4.16979e-06
86890	4.17126e-06	4.17038e-06	4.17807e-06	4.16706e-06	4.17091e-06	4.17036e-06	4.16714e-06	4.16723e-06	4.17127e-06	4.17042e-06
86891	4.17189e-06	4.17101e-06	4.1787e-06	4.16768e-06	4.17153e-06	4.17098e-06	4.16776e-06	4.16785e-06	4.17189e-06	4.17104e-06
86892	4.17251e-06	4.17163e-06	4.17932e-06	4.16831e-06	4.17216e-06	4.17161e-06	4.16839e-06	4.16848e-06	4.17252e-06	4.17167e-06
86893	4.17314e-06	4.17226e-06	4.17995e-06	4.16893e-06	4.17279e-06	4.17223e-06	4.16901e-06	4.1691e-06	4.17314e-06	4.1723e-06
86894	4.17376e-06	4.17288e-06	4.18058e-06	4.16956e-06	4.17341e-06	4.17286e-06	4.16964e-06	4.16973e-06	4.17377e-06	4.17292e-06
86895	4.17439e-06	4.17351e-06	4.1812e-06	4.17018e-06	4.17404e-06	4.17348e-06	4.17026e-06	4.17035e-06	4.1744e-06	4.17355e-06
86896	4.17502e-06	4.17414e-06	4.18183e-06	4.17081e-06	4.17466e-06	4.17411e-06	4.17089e-06	4.17098e-06	4.17502e-06	4.17417e-06
86897	4.17564e-06	4.17476e-06	4.18246e-06	4.17143e-06	4.17529e-06	4.17474e-06	4.17151e-06	4.17161e-06	4.17565e-06	4.1748e-06
86898	4.17627e-06	4.17539e-06	4.18308e-06	4.17206e-06	4.17592e-06	4.17536e-06	4.17214e-06	4.17223e-06	4.17627e-06	4.17543e-06
86899	4.17689e-06	4.17601e-06	4.18371e-06	4.17269e-06	4.17654e-06	4.17599e-06	4.17276e-06	4.17286e-06	4.1769e-06	4.17605e-06
86900	4.17752e-06	4.17664e-06	4.18434e-06	4.17331e-06	4.17717e-06	4.17661e-06	4.17339e-06	4.17348e-06	4.17753e-06	4.17668e-06
86901	4.17815e-06	4.17727e-06	4.18497e-06	4.17394e-06	4.17779e-06	4.17724e-06	4.17402e-06	4.17411e-06	4.17815e-06	4.1773e-06
86902	4.17877e-06	4.17789e-06	4.18559e-06	4.17456e-06	4.17842e-06	4.17787e-06	4.17464e-06	4.17473e-06	4.17878e-06	4.17793e-06
86903	4.1794e-06	4.17852e-06	4.18622e-06	4.17519e-06	4.17905e-06	4.17849e-06	4.17527e-06	4.17536e-06	4.17941e-06	4.17856e-06
86904	4.18003e-06	4.17915e-06	4.18685e-06	4.17582e-06	4.17967e-06	4.17912e-06	4.17589e-06	4.17599e-06	4.18003e-06	4.17918e-06
86905	4.18065e-06	4.17977e-06	4.18748e-06	4.17644e-06	4.1803e-06	4.17975e-06	4.17652e-06	4.17661e-06	4.18066e-06	4.17981e-06
86906	4.18128e-06	4.1804e-06	4.18811e-06	4.17707e-06	4.18093e-06	4.18037e-06	4.17715e-06	4.17724e-06	4.18129e-06	4.18044e-06
86907	4.18191e-06	4.18103e-06	4.18873e-06	4.1777e-06	4.18156e-06	4.181e-06	4.17777e-06	4.17787e-06	4.18191e-06	4.18106e-06
86908	4.18254e-06	4.18165e-06	4.18936e-06	4.17832e-06	4.18218e-06	4.18163e-06	4.1784e-06	4.17849e-06	4.18254e-06	4.18169e-06
86909	4.18316e-06	4.18228e-06	4.18999e-06	4.17895e-06	4.18281e-06	4.18225e-06	4.17903e-06	4.17912e-06	4.18317e-06	4.18232e-06
86910	4.18379e-06	4.18291e-06	4.19062e-06	4.17958e-06	4.18344e-06	4.18288e-06	4.17965e-06	4.17975e-06	4.1838e-06	4.18295e-06
86911	4.18442e-06	4.18353e-06	4.19125e-06	4.1802e-06	4.18406e-06	4.18351e-06	4.18028e-06	4.18037e-06	4.18442e-06	4.18357e-06
86912	4.18505e-06	4.18416e-06	4.19188e-06	4.18083e-06	4.18469e-06	4.18414e-06	4.18091e-06	4.181e-06	4.18505e-06	4.1842e-06
86913	4.18567e-06	4.18479e-06	4.1925e-06	4.18146e-06	4.18532e-06	4.18476e-06	4.18153e-06	4.18163e-06	4.18568e-06	4.18483e-06
86914	4.1863e-06	4.18542e-06	4.19313e-06	4.18208e-06	4.18595e-06	4.18539e-06	4.18216e-06	4.18225e-06	4.18631e-06	4.18546e-06
86915	4.18693e-06	4.18605e-06	4.19376e-06	4.18271e-06	4.18657e-06	4.18602e-06	4.18279e-06	4.18288e-06	4.18693e-06	4.18608e-06
86916	4.18756e-06	4.18667e-06	4.19439e-06	4.18334e-06	4.1872e-06	4.18665e-06	4.18342e-06	4.18351e-06	4.18756e-06	4.18671e-06
86917	4.18818e-06	4.1873e-06	4.19502e-06	4.18396e-06	4.18783e-06	4.18727e-06	4.18404e-06	4.18414e-06	4.18819e-06	4.18734e-06
86918	4.18881e-06	4.18793e-06	4.19565e-06	4.18459e-06	4.18846e-06	4.1879e-06	4.18467e-06	4.18476e-06	4.18882e-06	4.18797e-06
86919	4.18944e-06	4.18856e-06	4.19628e-06	4.18522e-06	4.18909e-06	4.18853e-06	4.1853e-06	4.18539e-06	4.18945e-06	4.18859e-06
86920	4.19007e-06	4.18918e-06	4.19691e-06	4.18585e-06	4.18971e-06	4.18916e-06	4.18593e-06	4.18602e-06	4.19007e-06	4.18922e-06
86921	4.1907e-06	4.18981e-06	4.19754e-06	4.18648e-06	4.19034e-06	4.18979e-06	4.18655e-06	4.18665e-06	4.1907e-06	4.18985e-06
86922	4.19133e-06	4.19044e-06	4.19817e-06	4.1871e-06	4.19097e-06	4.19042e-06	4.18718e-06	4.18727e-06	4.19133e-06	4.19048e-06
86923	4.19195e-06	4.19107e-06	4.1988e-06	4.18773e-06	4.1916e-06	4.19104e-06	4.18781e-06	4.1879e-06	4.19196e-06	4.19111e-06
86924	4.19258e-06	4.1917e-06	4.19942e-06	4.18836e-06	4.19223e-06	4.19167e-06	4.18844e-06	4.18853e-06	4.19259e-06	4.19174e-06
86925	4.19321e-06	4.19233e-06	4.20005e-06	4.18899e-06	4.19286e-06	4.1923e-06	4.18907e-06	4.18916e-06	4.19322e-06	4.19236e-06
86926	4.19384e-06	4.19296e-06	4.20068e-06	4.18962e-06	4.19349e-06	4.19293e-06	4.18969e-06	4.18979e-06	4.19385e-06	4.19299e-06
86927	4.19447e-06	4.19358e-06	4.20131e-06	4.19024e-06	4.19412e-06	4.19356e-06	4.19032e-06	4.19041e-06	4.19448e-06	4.19362e-06
86928	4.1951e-06	4.19421e-06	4.20194e-06	4.19087e-06	4.19474e-06	4.19419e-06	4.19095e-06	4.19104e-06	4.1951e-06	4.19425e-06
86929	4.19573e-06	4.19484e-06	4.20257e-06	4.1915e-06	4.19537e-06	4.19482e-06	4.19158e-06	4.19167e-06	4.19573e-06	4.19488e-06
86930	4.19636e-06	4.19547e-06	4.2032e-06	4.19213e-06	4.196e-06	4.19545e-06	4.19221e-06	4.1923e-06	4.19636e-06	4.19551e-06
86931	4.19699e-06	4.1961e-06	4.20384e-06	4.19276e-06	4.19663e-06	4.19607e-06	4.19284e-06	4.19293e-06	4.19699e-06	4.19614e-06
86932	4.19762e-06	4.19673e-06	4.20447e-06	4.19339e-06	4.19726e-06	4.1967e-06	4.19346e-06	4.19356e-06	4.19762e-06	4.19677e-06
86933	4.19824e-06	4.19736e-06	4.2051e-06	4.19402e-06	4.19789e-06	4.19733e-06	4.19409e-06	4.19419e-06	4.19825e-06	4.1974e-06
86934	4.19887e-06	4.19799e-06	4.20573e-06	4.19464e-06	4.19852e-06	4.19796e-06	4.19472e-06	4.19482e-06	4.19888e-06	4.19803e-06
86935	4.1995e-06	4.19862e-06	4.20636e-06	4.19527e-06	4.19915e-06	4.19859e-06	4.19535e-06	4.19544e-06	4.19951e-06	4.19866e-06
86936	4.20013e-06	4.19925e-06	4.20699e-06	4.1959e-06	4.19978e-06	4.19922e-06	4.19598e-06	4.19607e-06	4.20014e-06	4.19929e-06
86937	4.20076e-06	4.19988e-06	4.20762e-06	4.19653e-06	4.20041e-06	4.19985e-06	4.19661e-06	4.1967e-06	4.20077e-06	4.19992e-06
86938	4.20139e-06	4.20051e-06	4.20825e-06	4.19716e-06	4.20104e-06	4.20048e-06	4.19724e-06	4.19733e-06	4.2014e-06	4.20055e-06
86939	4.20202e-06	4.20114e-06	4.20888e-06	4.19779e-06	4.20167e-06	4.20111e-06	4.19787e-06	4.19796e-06	4.20203e-06	4.20118e-06
86940	4.20265e-06	4.20177e-06	4.20951e-06	4.19842e-06	4.2023e-06	4.20174e-06	4.1985e-06	4.19859e-06	4.20266e-06	4.20181e-06
86941	4.20328e-06	4.2024e-06	4.21014e-06	4.19905e-06	4.20293e-06	4.20237e-06	4.19913e-06	4.19922e-06	4.20329e-06	4.20244e-06
86942	4.20391e-06	4.20303e-06	4.21077e-06	4.19968e-06	4.20356e-06	4.203e-06	4.19976e-06	4.19985e-06	4.20392e-06	4.20307e-06
86943	4.20454e-06	4.20366e-06	4.21141e-06	4.20031e-06	4.20419e-06	4.20363e-06	4.20039e-06	4.20048e-06	4.20455e-06	4.2037e-06
86944	4.20518e-06	4.20429e-06	4.21204e-06	4.20094e-06	4.20482e-06	4.20426e-06	4.20102e-06	4.20111e-06	4.20518e-06	4.20433e-06
86945	4.20581e-06	4.20492e-06	4.21267e-06	4.20157e-06	4.20545e-06	4.20489e-06	4.20165e-06	4.20174e-06	4.20581e-06	4.20496e-06
86946	4.20644e-06	4.20555e-06	4.2133e-06	4.2022e-06	4.20608e-06	4.20552e-06	4.20228e-06	4.20237e-06	4.20644e-06	4.20559e-06
86947	4.20707e-06	4.20618e-06	4.21393e-06	4.20283e-06	4.20671e-06	4.20615e-06	4.20291e-06	4.203e-06	4.20707e-06	4.20622e-06
86948	4.2077e-06	4.20681e-06	4.21456e-06	4.20346e-06	4.20734e-06	4.20678e-06	4.20354e-06	4.20363e-06	4.2077e-06	4.20685e-06
86949	4.20833e-06	4.20744e-06	4.2152e-06	4.20409e-06	4.20797e-06	4.20742e-06	4.20417e-06	4.20426e-06	4.20834e-06	4.20748e-06
86950	4.20896e-06	4.20807e-06	4.21583e-06	4.20472e-06	4.2086e-06	4.20805e-06	4.2048e-06	4.20489e-06	4.20897e-06	4.20811e-06
86951	4.20959e-06	4.2087e-06	4.21646e-06	4.20535e-06	4.20924e-06	4.20868e-06	4.20543e-06	4.20552e-06	4.2096e-06	4.20874e-06
86952	4.21022e-06	4.20933e-06	4.21709e-06	4.20598e-06	4.20987e-06	4.20931e-06	4.20606e-06	4.20615e-06	4.21023e-06	4.20937e-06
86953	4.21085e-06	4.20997e-06	4.21773e-06	4.20661e-06	4.2105e-06	4.20994e-06	4.20669e-06	4.20678e-06	4.21086e-06	4.21e-06
86954	4.21149e-06	4.2106e-06	4.21836e-06	4.20724e-06	4.21113e-06	4.21057e-06	4.20732e-06	4.20741e-06	4.21149e-06	4.21064e-06
86955	4.21212e-06	4.21123e-06	4.21899e-06	4.20787e-06	4.21176e-06	4.2112e-06	4.20795e-06	4.20805e-06	4.21212e-06	4.21127e-06
86956	4.21275e-06	4.21186e-06	4.21962e-06	4.2085e-06	4.21239e-06	4.21183e-06	4.20858e-06	4.20868e-06	4.21275e-06	4.2119e-06
86957	4.21338e-06	4.21249e-06	4.22026e-06	4.20914e-06	4.21302e-06	4.21247e-06	4.20921e-06	4.20931e-06	4.21339e-06	4.21253e-06
86958	4.21401e-06	4.21312e-06	4.22089e-06	4.20977e-06	4.21366e-06	4.2131e-06	4.20985e-06	4.20994e-06	4.21402e-06	4.21316e-06
86959	4.21464e-06	4.21376e-06	4.22152e-06	4.2104e-06	4.21429e-06	4.21373e-06	4.21048e-06	4.21057e-06	4.21465e-06	4.21379e-06
86960	4.21528e-06	4.21439e-06	4.22215e-06	4.21103e-06	4.21492e-06	4.21436e-06	4.21111e-06	4.2112e-06	4.21528e-06	4.21443e-06
86961	4.21591e-06	4.21502e-06	4.22279e-06	4.21166e-06	4.21555e-06	4.21499e-06	4.21174e-06	4.21183e-06	4.21591e-06	4.21506e-06
86962	4.21654e-06	4.21565e-06	4.22342e-06	4.21229e-06	4.21618e-06	4.21562e-06	4.21237e-06	4.21246e-06	4.21655e-06	4.21569e-06
86963	4.21717e-06	4.21628e-06	4.22405e-06	4.21292e-06	4.21682e-06	4.21626e-06	4.213e-06	4.2131e-06	4.21718e-06	4.21632e-06
86964	4.2178e-06	4.21692e-06	4.22469e-06	4.21356e-06	4.21745e-06	4.21689e-06	4.21363e-06	4.21373e-06	4.21781e-06	4.21695e-06
86965	4.21844e-06	4.21755e-06	4.22532e-06	4.21419e-06	4.21808e-06	4.21752e-06	4.21427e-06	4.21436e-06	4.21844e-06	4.21759e-06
86966	4.21907e-06	4.21818e-06	4.22595e-06	4.21482e-06	4.21871e-06	4.21815e-06	4.2149e-06	4.21499e-06	4.21908e-06	4.21822e-06
86967	4.2197e-06	4.21881e-06	4.22659e-06	4.21545e-06	4.21935e-06	4.21879e-06	4.21553e-06	4.21562e-06	4.21971e-06	4.21885e-06
86968	4.22034e-06	4.21945e-06	4.22722e-06	4.21608e-06	4.21998e-06	4.21942e-06	4.21616e-06	4.21626e-06	4.22034e-06	4.21948e-06
86969	4.22097e-06	4.22008e-06	4.22786e-06	4.21672e-06	4.22061e-06	4.22005e-06	4.21679e-06	4.21689e-06	4.22097e-06	4.22012e-06
86970	4.2216e-06	4.22071e-06	4.22849e-06	4.21735e-06	4.22124e-06	4.22068e-06	4.21743e-06	4.21752e-06	4.22161e-06	4.22075e-06
86971	4.22223e-06	4.22134e-06	4.22912e-06	4.21798e-06	4.22188e-06	4.22132e-06	4.21806e-06	4.21815e-06	4.22224e-06	4.22138e-06
86972	4.22287e-06	4.22198e-06	4.22976e-06	4.21861e-06	4.22251e-06	4.22195e-06	4.21869e-06	4.21879e-06	4.22287e-06	4.22201e-06
86973	4.2235e-06	4.22261e-06	4.23039e-06	4.21925e-06	4.22314e-06	4.22258e-06	4.21932e-06	4.21942e-06	4.22351e-06	4.22265e-06
86974	4.22413e-06	4.22324e-06	4.23103e-06	4.21988e-06	4.22378e-06	4.22322e-06	4.21996e-06	4.22005e-06	4.22414e-06	4.22328e-06
86975	4.22477e-06	4.22388e-06	4.23166e-06	4.22051e-06	4.22441e-06	4.22385e-06	4.22059e-06	4.22068e-06	4.22477e-06	4.22391e-06
86976	4.2254e-06	4.22451e-06	4.2323e-06	4.22114e-06	4.22504e-06	4.22448e-06	4.22122e-06	4.22132e-06	4.22541e-06	4.22455e-06
86977	4.22603e-06	4.22514e-06	4.23293e-06	4.22178e-06	4.22568e-06	4.22512e-06	4.22186e-06	4.22195e-06	4.22604e-06	4.22518e-06
86978	4.22667e-06	4.22578e-06	4.23356e-06	4.22241e-06	4.22631e-06	4.22575e-06	4.22249e-06	4.22258e-06	4.22667e-06	4.22581e-06
86979	4.2273e-06	4.22641e-06	4.2342e-06	4.22304e-06	4.22694e-06	4.22638e-06	4.22312e-06	4.22322e-06	4.22731e-06	4.22645e-06
86980	4.22794e-06	4.22704e-06	4.23483e-06	4.22368e-06	4.22758e-06	4.22702e-06	4.22376e-06	4.22385e-06	4.22794e-06	4.22708e-06
86981	4.22857e-06	4.22768e-06	4.23547e-06	4.22431e-06	4.22821e-06	4.22765e-06	4.22439e-06	4.22448e-06	4.22858e-06	4.22772e-06
86982	4.2292e-06	4.22831e-06	4.2361e-06	4.22494e-06	4.22885e-06	4.22829e-06	4.22502e-06	4.22512e-06	4.22921e-06	4.22835e-06
86983	4.22984e-06	4.22895e-06	4.23674e-06	4.22558e-06	4.22948e-06	4.22892e-06	4.22566e-06	4.22575e-06	4.22984e-06	4.22898e-06
86984	4.23047e-06	4.22958e-06	4.23737e-06	4.22621e-06	4.23011e-06	4.22955e-06	4.22629e-06	4.22638e-06	4.23048e-06	4.22962e-06
86985	4.23111e-06	4.23021e-06	4.23801e-06	4.22684e-06	4.23075e-06	4.23019e-06	4.22692e-06	4.22702e-06	4.23111e-06	4.23025e-06
86986	4.23174e-06	4.23085e-06	4.23865e-06	4.22748e-06	4.23138e-06	4.23082e-06	4.22756e-06	4.22765e-06	4.23175e-06	4.23089e-06
86987	4.23238e-06	4.23148e-06	4.23928e-06	4.22811e-06	4.23202e-06	4.23146e-06	4.22819e-06	4.22828e-06	4.23238e-06	4.23152e-06
86988	4.23301e-06	4.23212e-06	4.23992e-06	4.22875e-06	4.23265e-06	4.23209e-06	4.22882e-06	4.22892e-06	4.23302e-06	4.23216e-06
86989	4.23364e-06	4.23275e-06	4.24055e-06	4.22938e-06	4.23329e-06	4.23273e-06	4.22946e-06	4.22955e-06	4.23365e-06	4.23279e-06
86990	4.23428e-06	4.23339e-06	4.24119e-06	4.23001e-06	4.23392e-06	4.23336e-06	4.23009e-06	4.23019e-06	4.23429e-06	4.23342e-06
86991	4.23491e-06	4.23402e-06	4.24182e-06	4.23065e-06	4.23456e-06	4.23399e-06	4.23073e-06	4.23082e-06	4.23492e-06	4.23406e-06
86992	4.23555e-06	4.23466e-06	4.24246e-06	4.23128e-06	4.23519e-06	4.23463e-06	4.23136e-06	4.23146e-06	4.23556e-06	4.23469e-06
86993	4.23618e-06	4.23529e-06	4.2431e-06	4.23192e-06	4.23583e-06	4.23526e-06	4.232e-06	4.23209e-06	4.23619e-06	4.23533e-06
86994	4.23682e-06	4.23593e-06	4.24373e-06	4.23255e-06	4.23646e-06	4.2359e-06	4.23263e-06	4.23272e-06	4.23683e-06	4.23596e-06
86995	4.23745e-06	4.23656e-06	4.24437e-06	4.23319e-06	4.2371e-06	4.23653e-06	4.23327e-06	4.23336e-06	4.23746e-06	4.2366e-06
86996	4.23809e-06	4.2372e-06	4.24501e-06	4.23382e-06	4.23773e-06	4.23717e-06	4.2339e-06	4.23399e-06	4.2381e-06	4.23723e-06
86997	4.23873e-06	4.23783e-06	4.24564e-06	4.23446e-06	4.23837e-06	4.23781e-06	4.23453e-06	4.23463e-06	4.23873e-06	4.23787e-06
86998	4.23936e-06	4.23847e-06	4.24628e-06	4.23509e-06	4.239e-06	4.23844e-06	4.23517e-06	4.23526e-06	4.23937e-06	4.23851e-06
86999	4.24e-06	4.2391e-06	4.24691e-06	4.23573e-06	4.23964e-06	4.23908e-06	4.2358e-06	4.2359e-06	4.24e-06	4.23914e-06
87000	4.24063e-06	4.23974e-06	4.24755e-06	4.23636e-06	4.24027e-06	4.23971e-06	4.23644e-06	4.23653e-06	4.24064e-06	4.23978e-06
87001	4.24127e-06	4.24037e-06	4.24819e-06	4.237e-06	4.24091e-06	4.24035e-06	4.23707e-06	4.23717e-06	4.24127e-06	4.24041e-06
87002	4.2419e-06	4.24101e-06	4.24883e-06	4.23763e-06	4.24155e-06	4.24098e-06	4.23771e-06	4.2378e-06	4.24191e-06	4.24105e-06
87003	4.24254e-06	4.24165e-06	4.24946e-06	4.23827e-06	4.24218e-06	4.24162e-06	4.23835e-06	4.23844e-06	4.24255e-06	4.24168e-06
87004	4.24318e-06	4.24228e-06	4.2501e-06	4.2389e-06	4.24282e-06	4.24226e-06	4.23898e-06	4.23907e-06	4.24318e-06	4.24232e-06
87005	4.24381e-06	4.24292e-06	4.25074e-06	4.23954e-06	4.24345e-06	4.24289e-06	4.23962e-06	4.23971e-06	4.24382e-06	4.24296e-06
87006	4.24445e-06	4.24355e-06	4.25137e-06	4.24017e-06	4.24409e-06	4.24353e-06	4.24025e-06	4.24035e-06	4.24445e-06	4.24359e-06
87007	4.24509e-06	4.24419e-06	4.25201e-06	4.24081e-06	4.24473e-06	4.24416e-06	4.24089e-06	4.24098e-06	4.24509e-06	4.24423e-06
87008	4.24572e-06	4.24483e-06	4.25265e-06	4.24145e-06	4.24536e-06	4.2448e-06	4.24152e-06	4.24162e-06	4.24573e-06	4.24486e-06
87009	4.24636e-06	4.24546e-06	4.25329e-06	4.24208e-06	4.246e-06	4.24544e-06	4.24216e-06	4.24225e-06	4.24636e-06	4.2455e-06
87010	4.24699e-06	4.2461e-06	4.25392e-06	4.24272e-06	4.24664e-06	4.24607e-06	4.2428e-06	4.24289e-06	4.247e-06	4.24614e-06
87011	4.24763e-06	4.24674e-06	4.25456e-06	4.24335e-06	4.24727e-06	4.24671e-06	4.24343e-06	4.24353e-06	4.24764e-06	4.24677e-06
87012	4.24827e-06	4.24737e-06	4.2552e-06	4.24399e-06	4.24791e-06	4.24735e-06	4.24407e-06	4.24416e-06	4.24827e-06	4.24741e-06
87013	4.24891e-06	4.24801e-06	4.25584e-06	4.24463e-06	4.24855e-06	4.24798e-06	4.2447e-06	4.2448e-06	4.24891e-06	4.24805e-06
87014	4.24954e-06	4.24865e-06	4.25648e-06	4.24526e-06	4.24918e-06	4.24862e-06	4.24534e-06	4.24544e-06	4.24955e-06	4.24868e-06
87015	4.25018e-06	4.24928e-06	4.25711e-06	4.2459e-06	4.24982e-06	4.24926e-06	4.24598e-06	4.24607e-06	4.25019e-06	4.24932e-06
87016	4.25082e-06	4.24992e-06	4.25775e-06	4.24654e-06	4.25046e-06	4.24989e-06	4.24661e-06	4.24671e-06	4.25082e-06	4.24996e-06
87017	4.25145e-06	4.25056e-06	4.25839e-06	4.24717e-06	4.2511e-06	4.25053e-06	4.24725e-06	4.24734e-06	4.25146e-06	4.2506e-06
87018	4.25209e-06	4.25119e-06	4.25903e-06	4.24781e-06	4.25173e-06	4.25117e-06	4.24789e-06	4.24798e-06	4.2521e-06	4.25123e-06
87019	4.25273e-06	4.25183e-06	4.25967e-06	4.24845e-06	4.25237e-06	4.25181e-06	4.24852e-06	4.24862e-06	4.25274e-06	4.25187e-06
87020	4.25337e-06	4.25247e-06	4.26031e-06	4.24908e-06	4.25301e-06	4.25244e-06	4.24916e-06	4.24926e-06	4.25337e-06	4.25251e-06
87021	4.254e-06	4.25311e-06	4.26094e-06	4.24972e-06	4.25365e-06	4.25308e-06	4.2498e-06	4.24989e-06	4.25401e-06	4.25315e-06
87022	4.25464e-06	4.25374e-06	4.26158e-06	4.25036e-06	4.25428e-06	4.25372e-06	4.25044e-06	4.25053e-06	4.25465e-06	4.25378e-06
87023	4.25528e-06	4.25438e-06	4.26222e-06	4.25099e-06	4.25492e-06	4.25436e-06	4.25107e-06	4.25117e-06	4.25529e-06	4.25442e-06
87024	4.25592e-06	4.25502e-06	4.26286e-06	4.25163e-06	4.25556e-06	4.25499e-06	4.25171e-06	4.2518e-06	4.25592e-06	4.25506e-06
87025	4.25656e-06	4.25566e-06	4.2635e-06	4.25227e-06	4.2562e-06	4.25563e-06	4.25235e-06	4.25244e-06	4.25656e-06	4.2557e-06
87026	4.25719e-06	4.2563e-06	4.26414e-06	4.25291e-06	4.25683e-06	4.25627e-06	4.25299e-06	4.25308e-06	4.2572e-06	4.25633e-06
87027	4.25783e-06	4.25693e-06	4.26478e-06	4.25354e-06	4.25747e-06	4.25691e-06	4.25362e-06	4.25372e-06	4.25784e-06	4.25697e-06
87028	4.25847e-06	4.25757e-06	4.26542e-06	4.25418e-06	4.25811e-06	4.25755e-06	4.25426e-06	4.25435e-06	4.25848e-06	4.25761e-06
87029	4.25911e-06	4.25821e-06	4.26606e-06	4.25482e-06	4.25875e-06	4.25818e-06	4.2549e-06	4.25499e-06	4.25912e-06	4.25825e-06
87030	4.25975e-06	4.25885e-06	4.2667e-06	4.25546e-06	4.25939e-06	4.25882e-06	4.25554e-06	4.25563e-06	4.25975e-06	4.25889e-06
87031	4.26039e-06	4.25949e-06	4.26734e-06	4.2561e-06	4.26003e-06	4.25946e-06	4.25617e-06	4.25627e-06	4.26039e-06	4.25953e-06
87032	4.26102e-06	4.26013e-06	4.26798e-06	4.25673e-06	4.26067e-06	4.2601e-06	4.25681e-06	4.25691e-06	4.26103e-06	4.26016e-06
87033	4.26166e-06	4.26077e-06	4.26862e-06	4.25737e-06	4.2613e-06	4.26074e-06	4.25745e-06	4.25755e-06	4.26167e-06	4.2608e-06
87034	4.2623e-06	4.2614e-06	4.26926e-06	4.25801e-06	4.26194e-06	4.26138e-06	4.25809e-06	4.25818e-06	4.26231e-06	4.26144e-06
87035	4.26294e-06	4.26204e-06	4.2699e-06	4.25865e-06	4.26258e-06	4.26202e-06	4.25873e-06	4.25882e-06	4.26295e-06	4.26208e-06
87036	4.26358e-06	4.26268e-06	4.27054e-06	4.25929e-06	4.26322e-06	4.26266e-06	4.25937e-06	4.25946e-06	4.26359e-06	4.26272e-06
87037	4.26422e-06	4.26332e-06	4.27118e-06	4.25993e-06	4.26386e-06	4.26329e-06	4.26e-06	4.2601e-06	4.26423e-06	4.26336e-06
87038	4.26486e-06	4.26396e-06	4.27182e-06	4.26056e-06	4.2645e-06	4.26393e-06	4.26064e-06	4.26074e-06	4.26487e-06	4.264e-06
87039	4.2655e-06	4.2646e-06	4.27246e-06	4.2612e-06	4.26514e-06	4.26457e-06	4.26128e-06	4.26138e-06	4.2655e-06	4.26464e-06
87040	4.26614e-06	4.26524e-06	4.2731e-06	4.26184e-06	4.26578e-06	4.26521e-06	4.26192e-06	4.26202e-06	4.26614e-06	4.26528e-06
87041	4.26678e-06	4.26588e-06	4.27374e-06	4.26248e-06	4.26642e-06	4.26585e-06	4.26256e-06	4.26265e-06	4.26678e-06	4.26592e-06
87042	4.26742e-06	4.26652e-06	4.27438e-06	4.26312e-06	4.26706e-06	4.26649e-06	4.2632e-06	4.26329e-06	4.26742e-06	4.26656e-06
87043	4.26806e-06	4.26716e-06	4.27502e-06	4.26376e-06	4.2677e-06	4.26713e-06	4.26384e-06	4.26393e-06	4.26806e-06	4.2672e-06
87044	4.2687e-06	4.2678e-06	4.27566e-06	4.2644e-06	4.26834e-06	4.26777e-06	4.26448e-06	4.26457e-06	4.2687e-06	4.26784e-06
87045	4.26934e-06	4.26844e-06	4.2763e-06	4.26504e-06	4.26898e-06	4.26841e-06	4.26512e-06	4.26521e-06	4.26934e-06	4.26848e-06
87046	4.26998e-06	4.26908e-06	4.27694e-06	4.26568e-06	4.26962e-06	4.26905e-06	4.26576e-06	4.26585e-06	4.26998e-06	4.26911e-06
87047	4.27062e-06	4.26972e-06	4.27758e-06	4.26632e-06	4.27026e-06	4.26969e-06	4.2664e-06	4.26649e-06	4.27062e-06	4.26975e-06
87048	4.27126e-06	4.27036e-06	4.27822e-06	4.26696e-06	4.2709e-06	4.27033e-06	4.26703e-06	4.26713e-06	4.27126e-06	4.2704e-06
87049	4.2719e-06	4.271e-06	4.27887e-06	4.2676e-06	4.27154e-06	4.27097e-06	4.26767e-06	4.26777e-06	4.2719e-06	4.27104e-06
87050	4.27254e-06	4.27164e-06	4.27951e-06	4.26823e-06	4.27218e-06	4.27161e-06	4.26831e-06	4.26841e-06	4.27254e-06	4.27168e-06
87051	4.27318e-06	4.27228e-06	4.28015e-06	4.26887e-06	4.27282e-06	4.27225e-06	4.26895e-06	4.26905e-06	4.27318e-06	4.27232e-06
87052	4.27382e-06	4.27292e-06	4.28079e-06	4.26951e-06	4.27346e-06	4.27289e-06	4.26959e-06	4.26969e-06	4.27382e-06	4.27296e-06
87053	4.27446e-06	4.27356e-06	4.28143e-06	4.27015e-06	4.2741e-06	4.27353e-06	4.27023e-06	4.27033e-06	4.27447e-06	4.2736e-06
87054	4.2751e-06	4.2742e-06	4.28207e-06	4.27079e-06	4.27474e-06	4.27417e-06	4.27087e-06	4.27097e-06	4.27511e-06	4.27424e-06
87055	4.27574e-06	4.27484e-06	4.28272e-06	4.27144e-06	4.27538e-06	4.27481e-06	4.27151e-06	4.27161e-06	4.27575e-06	4.27488e-06
87056	4.27638e-06	4.27548e-06	4.28336e-06	4.27208e-06	4.27602e-06	4.27545e-06	4.27215e-06	4.27225e-06	4.27639e-06	4.27552e-06
87057	4.27702e-06	4.27612e-06	4.284e-06	4.27272e-06	4.27666e-06	4.27609e-06	4.2728e-06	4.27289e-06	4.27703e-06	4.27616e-06
87058	4.27766e-06	4.27676e-06	4.28464e-06	4.27336e-06	4.2773e-06	4.27674e-06	4.27344e-06	4.27353e-06	4.27767e-06	4.2768e-06
87059	4.27831e-06	4.2774e-06	4.28528e-06	4.274e-06	4.27794e-06	4.27738e-06	4.27408e-06	4.27417e-06	4.27831e-06	4.27744e-06
87060	4.27895e-06	4.27804e-06	4.28593e-06	4.27464e-06	4.27859e-06	4.27802e-06	4.27472e-06	4.27481e-06	4.27895e-06	4.27808e-06
87061	4.27959e-06	4.27869e-06	4.28657e-06	4.27528e-06	4.27923e-06	4.27866e-06	4.27536e-06	4.27545e-06	4.27959e-06	4.27872e-06
87062	4.28023e-06	4.27933e-06	4.28721e-06	4.27592e-06	4.27987e-06	4.2793e-06	4.276e-06	4.27609e-06	4.28024e-06	4.27937e-06
87063	4.28087e-06	4.27997e-06	4.28785e-06	4.27656e-06	4.28051e-06	4.27994e-06	4.27664e-06	4.27673e-06	4.28088e-06	4.28001e-06
87064	4.28151e-06	4.28061e-06	4.2885e-06	4.2772e-06	4.28115e-06	4.28058e-06	4.27728e-06	4.27738e-06	4.28152e-06	4.28065e-06
87065	4.28215e-06	4.28125e-06	4.28914e-06	4.27784e-06	4.28179e-06	4.28123e-06	4.27792e-06	4.27802e-06	4.28216e-06	4.28129e-06
87066	4.2828e-06	4.28189e-06	4.28978e-06	4.27848e-06	4.28244e-06	4.28187e-06	4.27856e-06	4.27866e-06	4.2828e-06	4.28193e-06
87067	4.28344e-06	4.28254e-06	4.29043e-06	4.27913e-06	4.28308e-06	4.28251e-06	4.2792e-06	4.2793e-06	4.28344e-06	4.28257e-06
87068	4.28408e-06	4.28318e-06	4.29107e-06	4.27977e-06	4.28372e-06	4.28315e-06	4.27985e-06	4.27994e-06	4.28409e-06	4.28322e-06
87069	4.28472e-06	4.28382e-06	4.29171e-06	4.28041e-06	4.28436e-06	4.28379e-06	4.28049e-06	4.28058e-06	4.28473e-06	4.28386e-06
87070	4.28537e-06	4.28446e-06	4.29236e-06	4.28105e-06	4.285e-06	4.28444e-06	4.28113e-06	4.28122e-06	4.28537e-06	4.2845e-06
87071	4.28601e-06	4.2851e-06	4.293e-06	4.28169e-06	4.28565e-06	4.28508e-06	4.28177e-06	4.28187e-06	4.28601e-06	4.28514e-06
87072	4.28665e-06	4.28575e-06	4.29364e-06	4.28233e-06	4.28629e-06	4.28572e-06	4.28241e-06	4.28251e-06	4.28666e-06	4.28578e-06
87073	4.28729e-06	4.28639e-06	4.29429e-06	4.28298e-06	4.28693e-06	4.28636e-06	4.28305e-06	4.28315e-06	4.2873e-06	4.28643e-06
87074	4.28793e-06	4.28703e-06	4.29493e-06	4.28362e-06	4.28757e-06	4.287e-06	4.2837e-06	4.28379e-06	4.28794e-06	4.28707e-06
87075	4.28858e-06	4.28767e-06	4.29557e-06	4.28426e-06	4.28822e-06	4.28765e-06	4.28434e-06	4.28443e-06	4.28858e-06	4.28771e-06
87076	4.28922e-06	4.28832e-06	4.29622e-06	4.2849e-06	4.28886e-06	4.28829e-06	4.28498e-06	4.28508e-06	4.28923e-06	4.28836e-06
87077	4.28986e-06	4.28896e-06	4.29686e-06	4.28554e-06	4.2895e-06	4.28893e-06	4.28562e-06	4.28572e-06	4.28987e-06	4.289e-06
87078	4.29051e-06	4.2896e-06	4.2975e-06	4.28619e-06	4.29014e-06	4.28958e-06	4.28627e-06	4.28636e-06	4.29051e-06	4.28964e-06
87079	4.29115e-06	4.29024e-06	4.29815e-06	4.28683e-06	4.29079e-06	4.29022e-06	4.28691e-06	4.287e-06	4.29116e-06	4.29028e-06
87080	4.29179e-06	4.29089e-06	4.29879e-06	4.28747e-06	4.29143e-06	4.29086e-06	4.28755e-06	4.28765e-06	4.2918e-06	4.29093e-06
87081	4.29244e-06	4.29153e-06	4.29944e-06	4.28811e-06	4.29207e-06	4.2915e-06	4.28819e-06	4.28829e-06	4.29244e-06	4.29157e-06
87082	4.29308e-06	4.29217e-06	4.30008e-06	4.28876e-06	4.29272e-06	4.29215e-06	4.28884e-06	4.28893e-06	4.29309e-06	4.29221e-06
87083	4.29372e-06	4.29282e-06	4.30073e-06	4.2894e-06	4.29336e-06	4.29279e-06	4.28948e-06	4.28957e-06	4.29373e-06	4.29286e-06
87084	4.29437e-06	4.29346e-06	4.30137e-06	4.29004e-06	4.294e-06	4.29343e-06	4.29012e-06	4.29022e-06	4.29437e-06	4.2935e-06
87085	4.29501e-06	4.2941e-06	4.30202e-06	4.29069e-06	4.29465e-06	4.29408e-06	4.29077e-06	4.29086e-06	4.29502e-06	4.29414e-06
87086	4.29565e-06	4.29475e-06	4.30266e-06	4.29133e-06	4.29529e-06	4.29472e-06	4.29141e-06	4.2915e-06	4.29566e-06	4.29479e-06
87087	4.2963e-06	4.29539e-06	4.3033e-06	4.29197e-06	4.29594e-06	4.29537e-06	4.29205e-06	4.29215e-06	4.2963e-06	4.29543e-06
87088	4.29694e-06	4.29604e-06	4.30395e-06	4.29261e-06	4.29658e-06	4.29601e-06	4.29269e-06	4.29279e-06	4.29695e-06	4.29607e-06
87089	4.29759e-06	4.29668e-06	4.30459e-06	4.29326e-06	4.29722e-06	4.29665e-06	4.29334e-06	4.29343e-06	4.29759e-06	4.29672e-06
87090	4.29823e-06	4.29732e-06	4.30524e-06	4.2939e-06	4.29787e-06	4.2973e-06	4.29398e-06	4.29408e-06	4.29824e-06	4.29736e-06
87091	4.29887e-06	4.29797e-06	4.30589e-06	4.29455e-06	4.29851e-06	4.29794e-06	4.29463e-06	4.29472e-06	4.29888e-06	4.29801e-06
87092	4.29952e-06	4.29861e-06	4.30653e-06	4.29519e-06	4.29916e-06	4.29859e-06	4.29527e-06	4.29536e-06	4.29952e-06	4.29865e-06
87093	4.30016e-06	4.29926e-06	4.30718e-06	4.29583e-06	4.2998e-06	4.29923e-06	4.29591e-06	4.29601e-06	4.30017e-06	4.29929e-06
87094	4.30081e-06	4.2999e-06	4.30782e-06	4.29648e-06	4.30044e-06	4.29987e-06	4.29656e-06	4.29665e-06	4.30081e-06	4.29994e-06
87095	4.30145e-06	4.30054e-06	4.30847e-06	4.29712e-06	4.30109e-06	4.30052e-06	4.2972e-06	4.2973e-06	4.30146e-06	4.30058e-06
87096	4.3021e-06	4.30119e-06	4.30911e-06	4.29776e-06	4.30173e-06	4.30116e-06	4.29784e-06	4.29794e-06	4.3021e-06	4.30123e-06
87097	4.30274e-06	4.30183e-06	4.30976e-06	4.29841e-06	4.30238e-06	4.30181e-06	4.29849e-06	4.29858e-06	4.30275e-06	4.30187e-06
87098	4.30339e-06	4.30248e-06	4.3104e-06	4.29905e-06	4.30302e-06	4.30245e-06	4.29913e-06	4.29923e-06	4.30339e-06	4.30252e-06
87099	4.30403e-06	4.30312e-06	4.31105e-06	4.2997e-06	4.30367e-06	4.3031e-06	4.29978e-06	4.29987e-06	4.30404e-06	4.30316e-06
87100	4.30468e-06	4.30377e-06	4.3117e-06	4.30034e-06	4.30431e-06	4.30374e-06	4.30042e-06	4.30052e-06	4.30468e-06	4.30381e-06
87101	4.30532e-06	4.30441e-06	4.31234e-06	4.30099e-06	4.30496e-06	4.30439e-06	4.30107e-06	4.30116e-06	4.30533e-06	4.30445e-06
87102	4.30597e-06	4.30506e-06	4.31299e-06	4.30163e-06	4.3056e-06	4.30503e-06	4.30171e-06	4.30181e-06	4.30597e-06	4.3051e-06
87103	4.30661e-06	4.3057e-06	4.31363e-06	4.30228e-06	4.30625e-06	4.30568e-06	4.30236e-06	4.30245e-06	4.30662e-06	4.30574e-06
87104	4.30726e-06	4.30635e-06	4.31428e-06	4.30292e-06	4.30689e-06	4.30632e-06	4.303e-06	4.3031e-06	4.30726e-06	4.30639e-06
87105	4.3079e-06	4.30699e-06	4.31493e-06	4.30357e-06	4.30754e-06	4.30697e-06	4.30365e-06	4.30374e-06	4.30791e-06	4.30703e-06
87106	4.30855e-06	4.30764e-06	4.31557e-06	4.30421e-06	4.30818e-06	4.30761e-06	4.30429e-06	4.30439e-06	4.30855e-06	4.30768e-06
87107	4.30919e-06	4.30829e-06	4.31622e-06	4.30486e-06	4.30883e-06	4.30826e-06	4.30494e-06	4.30503e-06	4.3092e-06	4.30832e-06
87108	4.30984e-06	4.30893e-06	4.31687e-06	4.3055e-06	4.30948e-06	4.3089e-06	4.30558e-06	4.30568e-06	4.30985e-06	4.30897e-06
87109	4.31049e-06	4.30958e-06	4.31751e-06	4.30615e-06	4.31012e-06	4.30955e-06	4.30623e-06	4.30632e-06	4.31049e-06	4.30962e-06
87110	4.31113e-06	4.31022e-06	4.31816e-06	4.30679e-06	4.31077e-06	4.3102e-06	4.30687e-06	4.30697e-06	4.31114e-06	4.31026e-06
87111	4.31178e-06	4.31087e-06	4.31881e-06	4.30744e-06	4.31141e-06	4.31084e-06	4.30752e-06	4.30761e-06	4.31178e-06	4.31091e-06
87112	4.31242e-06	4.31151e-06	4.31946e-06	4.30808e-06	4.31206e-06	4.31149e-06	4.30816e-06	4.30826e-06	4.31243e-06	4.31155e-06
87113	4.31307e-06	4.31216e-06	4.3201e-06	4.30873e-06	4.31271e-06	4.31213e-06	4.30881e-06	4.3089e-06	4.31308e-06	4.3122e-06
87114	4.31372e-06	4.31281e-06	4.32075e-06	4.30937e-06	4.31335e-06	4.31278e-06	4.30945e-06	4.30955e-06	4.31372e-06	4.31285e-06
87115	4.31436e-06	4.31345e-06	4.3214e-06	4.31002e-06	4.314e-06	4.31343e-06	4.3101e-06	4.31019e-06	4.31437e-06	4.31349e-06
87116	4.31501e-06	4.3141e-06	4.32205e-06	4.31067e-06	4.31464e-06	4.31407e-06	4.31075e-06	4.31084e-06	4.31502e-06	4.31414e-06
87117	4.31566e-06	4.31475e-06	4.32269e-06	4.31131e-06	4.31529e-06	4.31472e-06	4.31139e-06	4.31149e-06	4.31566e-06	4.31479e-06
87118	4.3163e-06	4.31539e-06	4.32334e-06	4.31196e-06	4.31594e-06	4.31537e-06	4.31204e-06	4.31213e-06	4.31631e-06	4.31543e-06
87119	4.31695e-06	4.31604e-06	4.32399e-06	4.3126e-06	4.31658e-06	4.31601e-06	4.31268e-06	4.31278e-06	4.31696e-06	4.31608e-06
87120	4.3176e-06	4.31669e-06	4.32464e-06	4.31325e-06	4.31723e-06	4.31666e-06	4.31333e-06	4.31342e-06	4.3176e-06	4.31673e-06
87121	4.31824e-06	4.31733e-06	4.32528e-06	4.3139e-06	4.31788e-06	4.31731e-06	4.31398e-06	4.31407e-06	4.31825e-06	4.31737e-06
87122	4.31889e-06	4.31798e-06	4.32593e-06	4.31454e-06	4.31853e-06	4.31795e-06	4.31462e-06	4.31472e-06	4.3189e-06	4.31802e-06
87123	4.31954e-06	4.31863e-06	4.32658e-06	4.31519e-06	4.31917e-06	4.3186e-06	4.31527e-06	4.31536e-06	4.31954e-06	4.31867e-06
87124	4.32018e-06	4.31927e-06	4.32723e-06	4.31584e-06	4.31982e-06	4.31925e-06	4.31592e-06	4.31601e-06	4.32019e-06	4.31931e-06
87125	4.32083e-06	4.31992e-06	4.32788e-06	4.31648e-06	4.32047e-06	4.31989e-06	4.31656e-06	4.31666e-06	4.32084e-06	4.31996e-06
87126	4.32148e-06	4.32057e-06	4.32853e-06	4.31713e-06	4.32111e-06	4.32054e-06	4.31721e-06	4.3173e-06	4.32149e-06	4.32061e-06
87127	4.32213e-06	4.32122e-06	4.32917e-06	4.31778e-06	4.32176e-06	4.32119e-06	4.31786e-06	4.31795e-06	4.32213e-06	4.32126e-06
87128	4.32277e-06	4.32186e-06	4.32982e-06	4.31842e-06	4.32241e-06	4.32184e-06	4.3185e-06	4.3186e-06	4.32278e-06	4.3219e-06
87129	4.32342e-06	4.32251e-06	4.33047e-06	4.31907e-06	4.32306e-06	4.32248e-06	4.31915e-06	4.31925e-06	4.32343e-06	4.32255e-06
87130	4.32407e-06	4.32316e-06	4.33112e-06	4.31972e-06	4.32371e-06	4.32313e-06	4.3198e-06	4.31989e-06	4.32408e-06	4.3232e-06
87131	4.32472e-06	4.32381e-06	4.33177e-06	4.32036e-06	4.32435e-06	4.32378e-06	4.32044e-06	4.32054e-06	4.32472e-06	4.32385e-06
87132	4.32537e-06	4.32445e-06	4.33242e-06	4.32101e-06	4.325e-06	4.32443e-06	4.32109e-06	4.32119e-06	4.32537e-06	4.32449e-06
87133	4.32601e-06	4.3251e-06	4.33307e-06	4.32166e-06	4.32565e-06	4.32508e-06	4.32174e-06	4.32184e-06	4.32602e-06	4.32514e-06
87134	4.32666e-06	4.32575e-06	4.33372e-06	4.32231e-06	4.3263e-06	4.32572e-06	4.32239e-06	4.32248e-06	4.32667e-06	4.32579e-06
87135	4.32731e-06	4.3264e-06	4.33437e-06	4.32295e-06	4.32695e-06	4.32637e-06	4.32304e-06	4.32313e-06	4.32732e-06	4.32644e-06
87136	4.32796e-06	4.32705e-06	4.33502e-06	4.3236e-06	4.32759e-06	4.32702e-06	4.32368e-06	4.32378e-06	4.32797e-06	4.32709e-06
87137	4.32861e-06	4.3277e-06	4.33566e-06	4.32425e-06	4.32824e-06	4.32767e-06	4.32433e-06	4.32443e-06	4.32861e-06	4.32773e-06
87138	4.32926e-06	4.32834e-06	4.33631e-06	4.3249e-06	4.32889e-06	4.32832e-06	4.32498e-06	4.32507e-06	4.32926e-06	4.32838e-06
87139	4.3299e-06	4.32899e-06	4.33696e-06	4.32555e-06	4.32954e-06	4.32897e-06	4.32563e-06	4.32572e-06	4.32991e-06	4.32903e-06
87140	4.33055e-06	4.32964e-06	4.33761e-06	4.32619e-06	4.33019e-06	4.32961e-06	4.32627e-06	4.32637e-06	4.33056e-06	4.32968e-06
87141	4.3312e-06	4.33029e-06	4.33826e-06	4.32684e-06	4.33084e-06	4.33026e-06	4.32692e-06	4.32702e-06	4.33121e-06	4.33033e-06
87142	4.33185e-06	4.33094e-06	4.33891e-06	4.32749e-06	4.33149e-06	4.33091e-06	4.32757e-06	4.32767e-06	4.33186e-06	4.33098e-06
87143	4.3325e-06	4.33159e-06	4.33956e-06	4.32814e-06	4.33213e-06	4.33156e-06	4.32822e-06	4.32832e-06	4.33251e-06	4.33163e-06
87144	4.33315e-06	4.33224e-06	4.34021e-06	4.32879e-06	4.33278e-06	4.33221e-06	4.32887e-06	4.32896e-06	4.33316e-06	4.33228e-06
87145	4.3338e-06	4.33288e-06	4.34086e-06	4.32944e-06	4.33343e-06	4.33286e-06	4.32952e-06	4.32961e-06	4.3338e-06	4.33292e-06
87146	4.33445e-06	4.33353e-06	4.34151e-06	4.33008e-06	4.33408e-06	4.33351e-06	4.33017e-06	4.33026e-06	4.33445e-06	4.33357e-06
87147	4.3351e-06	4.33418e-06	4.34216e-06	4.33073e-06	4.33473e-06	4.33416e-06	4.33081e-06	4.33091e-06	4.3351e-06	4.33422e-06
87148	4.33575e-06	4.33483e-06	4.34281e-06	4.33138e-06	4.33538e-06	4.33481e-06	4.33146e-06	4.33156e-06	4.33575e-06	4.33487e-06
87149	4.3364e-06	4.33548e-06	4.34347e-06	4.33203e-06	4.33603e-06	4.33546e-06	4.33211e-06	4.33221e-06	4.3364e-06	4.33552e-06
87150	4.33705e-06	4.33613e-06	4.34412e-06	4.33268e-06	4.33668e-06	4.3361e-06	4.33276e-06	4.33286e-06	4.33705e-06	4.33617e-06
87151	4.3377e-06	4.33678e-06	4.34477e-06	4.33333e-06	4.33733e-06	4.33675e-06	4.33341e-06	4.33351e-06	4.3377e-06	4.33682e-06
87152	4.33835e-06	4.33743e-06	4.34542e-06	4.33398e-06	4.33798e-06	4.3374e-06	4.33406e-06	4.33416e-06	4.33835e-06	4.33747e-06
87153	4.339e-06	4.33808e-06	4.34607e-06	4.33463e-06	4.33863e-06	4.33805e-06	4.33471e-06	4.3348e-06	4.339e-06	4.33812e-06
87154	4.33965e-06	4.33873e-06	4.34672e-06	4.33528e-06	4.33928e-06	4.3387e-06	4.33536e-06	4.33545e-06	4.33965e-06	4.33877e-06
87155	4.3403e-06	4.33938e-06	4.34737e-06	4.33593e-06	4.33993e-06	4.33935e-06	4.33601e-06	4.3361e-06	4.3403e-06	4.33942e-06
87156	4.34095e-06	4.34003e-06	4.34802e-06	4.33658e-06	4.34058e-06	4.34e-06	4.33666e-06	4.33675e-06	4.34095e-06	4.34007e-06
87157	4.3416e-06	4.34068e-06	4.34867e-06	4.33723e-06	4.34123e-06	4.34065e-06	4.33731e-06	4.3374e-06	4.3416e-06	4.34072e-06
87158	4.34225e-06	4.34133e-06	4.34932e-06	4.33788e-06	4.34188e-06	4.3413e-06	4.33796e-06	4.33805e-06	4.34225e-06	4.34137e-06
87159	4.3429e-06	4.34198e-06	4.34998e-06	4.33853e-06	4.34253e-06	4.34195e-06	4.33861e-06	4.3387e-06	4.3429e-06	4.34202e-06
87160	4.34355e-06	4.34263e-06	4.35063e-06	4.33918e-06	4.34318e-06	4.34261e-06	4.33926e-06	4.33935e-06	4.34355e-06	4.34267e-06
87161	4.3442e-06	4.34328e-06	4.35128e-06	4.33983e-06	4.34383e-06	4.34326e-06	4.33991e-06	4.34e-06	4.3442e-06	4.34332e-06
87162	4.34485e-06	4.34393e-06	4.35193e-06	4.34048e-06	4.34448e-06	4.34391e-06	4.34056e-06	4.34065e-06	4.34485e-06	4.34397e-06
87163	4.3455e-06	4.34458e-06	4.35258e-06	4.34113e-06	4.34513e-06	4.34456e-06	4.34121e-06	4.3413e-06	4.34551e-06	4.34462e-06
87164	4.34615e-06	4.34523e-06	4.35323e-06	4.34178e-06	4.34578e-06	4.34521e-06	4.34186e-06	4.34195e-06	4.34616e-06	4.34527e-06
87165	4.3468e-06	4.34589e-06	4.35389e-06	4.34243e-06	4.34643e-06	4.34586e-06	4.34251e-06	4.3426e-06	4.34681e-06	4.34592e-06
87166	4.34745e-06	4.34654e-06	4.35454e-06	4.34308e-06	4.34709e-06	4.34651e-06	4.34316e-06	4.34325e-06	4.34746e-06	4.34658e-06
87167	4.3481e-06	4.34719e-06	4.35519e-06	4.34373e-06	4.34774e-06	4.34716e-06	4.34381e-06	4.3439e-06	4.34811e-06	4.34723e-06
87168	4.34876e-06	4.34784e-06	4.35584e-06	4.34438e-06	4.34839e-06	4.34781e-06	4.34446e-06	4.34456e-06	4.34876e-06	4.34788e-06
87169	4.34941e-06	4.34849e-06	4.3565e-06	4.34503e-06	4.34904e-06	4.34846e-06	4.34511e-06	4.34521e-06	4.34941e-06	4.34853e-06
87170	4.35006e-06	4.34914e-06	4.35715e-06	4.34568e-06	4.34969e-06	4.34911e-06	4.34576e-06	4.34586e-06	4.35006e-06	4.34918e-06
87171	4.35071e-06	4.34979e-06	4.3578e-06	4.34633e-06	4.35034e-06	4.34977e-06	4.34641e-06	4.34651e-06	4.35072e-06	4.34983e-06
87172	4.35136e-06	4.35044e-06	4.35845e-06	4.34698e-06	4.35099e-06	4.35042e-06	4.34706e-06	4.34716e-06	4.35137e-06	4.35048e-06
87173	4.35201e-06	4.3511e-06	4.35911e-06	4.34763e-06	4.35165e-06	4.35107e-06	4.34771e-06	4.34781e-06	4.35202e-06	4.35114e-06
87174	4.35266e-06	4.35175e-06	4.35976e-06	4.34828e-06	4.3523e-06	4.35172e-06	4.34837e-06	4.34846e-06	4.35267e-06	4.35179e-06
87175	4.35332e-06	4.3524e-06	4.36041e-06	4.34894e-06	4.35295e-06	4.35237e-06	4.34902e-06	4.34911e-06	4.35332e-06	4.35244e-06
87176	4.35397e-06	4.35305e-06	4.36107e-06	4.34959e-06	4.3536e-06	4.35302e-06	4.34967e-06	4.34976e-06	4.35397e-06	4.35309e-06
87177	4.35462e-06	4.3537e-06	4.36172e-06	4.35024e-06	4.35425e-06	4.35368e-06	4.35032e-06	4.35042e-06	4.35463e-06	4.35374e-06
87178	4.35527e-06	4.35436e-06	4.36237e-06	4.35089e-06	4.35491e-06	4.35433e-06	4.35097e-06	4.35107e-06	4.35528e-06	4.35439e-06
87179	4.35593e-06	4.35501e-06	4.36302e-06	4.35154e-06	4.35556e-06	4.35498e-06	4.35162e-06	4.35172e-06	4.35593e-06	4.35505e-06
87180	4.35658e-06	4.35566e-06	4.36368e-06	4.35219e-06	4.35621e-06	4.35563e-06	4.35228e-06	4.35237e-06	4.35658e-06	4.3557e-06
87181	4.35723e-06	4.35631e-06	4.36433e-06	4.35285e-06	4.35686e-06	4.35629e-06	4.35293e-06	4.35302e-06	4.35724e-06	4.35635e-06
87182	4.35788e-06	4.35696e-06	4.36499e-06	4.3535e-06	4.35752e-06	4.35694e-06	4.35358e-06	4.35367e-06	4.35789e-06	4.357e-06
87183	4.35854e-06	4.35762e-06	4.36564e-06	4.35415e-06	4.35817e-06	4.35759e-06	4.35423e-06	4.35433e-06	4.35854e-06	4.35766e-06
87184	4.35919e-06	4.35827e-06	4.36629e-06	4.3548e-06	4.35882e-06	4.35824e-06	4.35488e-06	4.35498e-06	4.35919e-06	4.35831e-06
87185	4.35984e-06	4.35892e-06	4.36695e-06	4.35545e-06	4.35947e-06	4.3589e-06	4.35554e-06	4.35563e-06	4.35985e-06	4.35896e-06
87186	4.36049e-06	4.35958e-06	4.3676e-06	4.35611e-06	4.36013e-06	4.35955e-06	4.35619e-06	4.35628e-06	4.3605e-06	4.35961e-06
87187	4.36115e-06	4.36023e-06	4.36825e-06	4.35676e-06	4.36078e-06	4.3602e-06	4.35684e-06	4.35694e-06	4.36115e-06	4.36027e-06
87188	4.3618e-06	4.36088e-06	4.36891e-06	4.35741e-06	4.36143e-06	4.36085e-06	4.35749e-06	4.35759e-06	4.36181e-06	4.36092e-06
87189	4.36245e-06	4.36153e-06	4.36956e-06	4.35806e-06	4.36209e-06	4.36151e-06	4.35815e-06	4.35824e-06	4.36246e-06	4.36157e-06
87190	4.36311e-06	4.36219e-06	4.37022e-06	4.35872e-06	4.36274e-06	4.36216e-06	4.3588e-06	4.35889e-06	4.36311e-06	4.36223e-06
87191	4.36376e-06	4.36284e-06	4.37087e-06	4.35937e-06	4.36339e-06	4.36281e-06	4.35945e-06	4.35955e-06	4.36377e-06	4.36288e-06
87192	4.36441e-06	4.36349e-06	4.37153e-06	4.36002e-06	4.36405e-06	4.36347e-06	4.3601e-06	4.3602e-06	4.36442e-06	4.36353e-06
87193	4.36507e-06	4.36415e-06	4.37218e-06	4.36068e-06	4.3647e-06	4.36412e-06	4.36076e-06	4.36085e-06	4.36507e-06	4.36419e-06
87194	4.36572e-06	4.3648e-06	4.37283e-06	4.36133e-06	4.36535e-06	4.36477e-06	4.36141e-06	4.36151e-06	4.36573e-06	4.36484e-06
87195	4.36637e-06	4.36545e-06	4.37349e-06	4.36198e-06	4.36601e-06	4.36543e-06	4.36206e-06	4.36216e-06	4.36638e-06	4.36549e-06
87196	4.36703e-06	4.36611e-06	4.37414e-06	4.36264e-06	4.36666e-06	4.36608e-06	4.36272e-06	4.36281e-06	4.36703e-06	4.36615e-06
87197	4.36768e-06	4.36676e-06	4.3748e-06	4.36329e-06	4.36731e-06	4.36674e-06	4.36337e-06	4.36347e-06	4.36769e-06	4.3668e-06
87198	4.36834e-06	4.36742e-06	4.37545e-06	4.36394e-06	4.36797e-06	4.36739e-06	4.36402e-06	4.36412e-06	4.36834e-06	4.36746e-06
87199	4.36899e-06	4.36807e-06	4.37611e-06	4.3646e-06	4.36862e-06	4.36804e-06	4.36468e-06	4.36477e-06	4.369e-06	4.36811e-06
87200	4.36964e-06	4.36872e-06	4.37676e-06	4.36525e-06	4.36928e-06	4.3687e-06	4.36533e-06	4.36543e-06	4.36965e-06	4.36876e-06
87201	4.3703e-06	4.36938e-06	4.37742e-06	4.3659e-06	4.36993e-06	4.36935e-06	4.36598e-06	4.36608e-06	4.37031e-06	4.36942e-06
87202	4.37095e-06	4.37003e-06	4.37808e-06	4.36656e-06	4.37058e-06	4.37001e-06	4.36664e-06	4.36673e-06	4.37096e-06	4.37007e-06
87203	4.37161e-06	4.37069e-06	4.37873e-06	4.36721e-06	4.37124e-06	4.37066e-06	4.36729e-06	4.36739e-06	4.37161e-06	4.37073e-06
87204	4.37226e-06	4.37134e-06	4.37939e-06	4.36786e-06	4.37189e-06	4.37131e-06	4.36795e-06	4.36804e-06	4.37227e-06	4.37138e-06
87205	4.37292e-06	4.372e-06	4.38004e-06	4.36852e-06	4.37255e-06	4.37197e-06	4.3686e-06	4.3687e-06	4.37292e-06	4.37204e-06
87206	4.37357e-06	4.37265e-06	4.3807e-06	4.36917e-06	4.3732e-06	4.37262e-06	4.36925e-06	4.36935e-06	4.37358e-06	4.37269e-06
87207	4.37423e-06	4.37331e-06	4.38135e-06	4.36983e-06	4.37386e-06	4.37328e-06	4.36991e-06	4.37e-06	4.37423e-06	4.37334e-06
87208	4.37488e-06	4.37396e-06	4.38201e-06	4.37048e-06	4.37451e-06	4.37393e-06	4.37056e-06	4.37066e-06	4.37489e-06	4.374e-06
87209	4.37554e-06	4.37462e-06	4.38267e-06	4.37114e-06	4.37517e-06	4.37459e-06	4.37122e-06	4.37131e-06	4.37554e-06	4.37465e-06
87210	4.37619e-06	4.37527e-06	4.38332e-06	4.37179e-06	4.37582e-06	4.37524e-06	4.37187e-06	4.37197e-06	4.3762e-06	4.37531e-06
87211	4.37685e-06	4.37593e-06	4.38398e-06	4.37244e-06	4.37648e-06	4.3759e-06	4.37253e-06	4.37262e-06	4.37685e-06	4.37596e-06
87212	4.3775e-06	4.37658e-06	4.38463e-06	4.3731e-06	4.37713e-06	4.37655e-06	4.37318e-06	4.37328e-06	4.37751e-06	4.37662e-06
87213	4.37816e-06	4.37724e-06	4.38529e-06	4.37375e-06	4.37779e-06	4.37721e-06	4.37384e-06	4.37393e-06	4.37816e-06	4.37728e-06
87214	4.37881e-06	4.37789e-06	4.38595e-06	4.37441e-06	4.37844e-06	4.37786e-06	4.37449e-06	4.37459e-06	4.37882e-06	4.37793e-06
87215	4.37947e-06	4.37855e-06	4.3866e-06	4.37506e-06	4.3791e-06	4.37852e-06	4.37515e-06	4.37524e-06	4.37947e-06	4.37859e-06
87216	4.38012e-06	4.3792e-06	4.38726e-06	4.37572e-06	4.37975e-06	4.37917e-06	4.3758e-06	4.3759e-06	4.38013e-06	4.37924e-06
87217	4.38078e-06	4.37986e-06	4.38792e-06	4.37637e-06	4.38041e-06	4.37983e-06	4.37646e-06	4.37655e-06	4.38079e-06	4.3799e-06
87218	4.38144e-06	4.38051e-06	4.38857e-06	4.37703e-06	4.38107e-06	4.38049e-06	4.37711e-06	4.37721e-06	4.38144e-06	4.38055e-06
87219	4.38209e-06	4.38117e-06	4.38923e-06	4.37768e-06	4.38172e-06	4.38114e-06	4.37777e-06	4.37786e-06	4.3821e-06	4.38121e-06
87220	4.38275e-06	4.38182e-06	4.38989e-06	4.37834e-06	4.38238e-06	4.3818e-06	4.37842e-06	4.37852e-06	4.38275e-06	4.38186e-06
87221	4.3834e-06	4.38248e-06	4.39054e-06	4.379e-06	4.38303e-06	4.38245e-06	4.37908e-06	4.37917e-06	4.38341e-06	4.38252e-06
87222	4.38406e-06	4.38314e-06	4.3912e-06	4.37965e-06	4.38369e-06	4.38311e-06	4.37973e-06	4.37983e-06	4.38407e-06	4.38318e-06
87223	4.38472e-06	4.38379e-06	4.39186e-06	4.38031e-06	4.38435e-06	4.38377e-06	4.38039e-06	4.38048e-06	4.38472e-06	4.38383e-06
87224	4.38537e-06	4.38445e-06	4.39252e-06	4.38096e-06	4.385e-06	4.38442e-06	4.38104e-06	4.38114e-06	4.38538e-06	4.38449e-06
87225	4.38603e-06	4.38511e-06	4.39317e-06	4.38162e-06	4.38566e-06	4.38508e-06	4.3817e-06	4.3818e-06	4.38604e-06	4.38515e-06
87226	4.38669e-06	4.38576e-06	4.39383e-06	4.38227e-06	4.38632e-06	4.38573e-06	4.38236e-06	4.38245e-06	4.38669e-06	4.3858e-06
87227	4.38734e-06	4.38642e-06	4.39449e-06	4.38293e-06	4.38697e-06	4.38639e-06	4.38301e-06	4.38311e-06	4.38735e-06	4.38646e-06
87228	4.388e-06	4.38707e-06	4.39515e-06	4.38359e-06	4.38763e-06	4.38705e-06	4.38367e-06	4.38376e-06	4.38801e-06	4.38711e-06
87229	4.38866e-06	4.38773e-06	4.3958e-06	4.38424e-06	4.38829e-06	4.3877e-06	4.38432e-06	4.38442e-06	4.38866e-06	4.38777e-06
87230	4.38931e-06	4.38839e-06	4.39646e-06	4.3849e-06	4.38894e-06	4.38836e-06	4.38498e-06	4.38508e-06	4.38932e-06	4.38843e-06
87231	4.38997e-06	4.38905e-06	4.39712e-06	4.38556e-06	4.3896e-06	4.38902e-06	4.38564e-06	4.38573e-06	4.38998e-06	4.38908e-06
87232	4.39063e-06	4.3897e-06	4.39778e-06	4.38621e-06	4.39026e-06	4.38968e-06	4.38629e-06	4.38639e-06	4.39063e-06	4.38974e-06
87233	4.39128e-06	4.39036e-06	4.39844e-06	4.38687e-06	4.39091e-06	4.39033e-06	4.38695e-06	4.38705e-06	4.39129e-06	4.3904e-06
87234	4.39194e-06	4.39102e-06	4.39909e-06	4.38752e-06	4.39157e-06	4.39099e-06	4.38761e-06	4.3877e-06	4.39195e-06	4.39106e-06
87235	4.3926e-06	4.39167e-06	4.39975e-06	4.38818e-06	4.39223e-06	4.39165e-06	4.38826e-06	4.38836e-06	4.3926e-06	4.39171e-06
87236	4.39326e-06	4.39233e-06	4.40041e-06	4.38884e-06	4.39289e-06	4.3923e-06	4.38892e-06	4.38902e-06	4.39326e-06	4.39237e-06
87237	4.39391e-06	4.39299e-06	4.40107e-06	4.3895e-06	4.39354e-06	4.39296e-06	4.38958e-06	4.38967e-06	4.39392e-06	4.39303e-06
87238	4.39457e-06	4.39365e-06	4.40173e-06	4.39015e-06	4.3942e-06	4.39362e-06	4.39023e-06	4.39033e-06	4.39458e-06	4.39369e-06
87239	4.39523e-06	4.3943e-06	4.40239e-06	4.39081e-06	4.39486e-06	4.39428e-06	4.39089e-06	4.39099e-06	4.39523e-06	4.39434e-06
87240	4.39589e-06	4.39496e-06	4.40304e-06	4.39147e-06	4.39552e-06	4.39493e-06	4.39155e-06	4.39164e-06	4.39589e-06	4.395e-06
87241	4.39654e-06	4.39562e-06	4.4037e-06	4.39212e-06	4.39617e-06	4.39559e-06	4.39221e-06	4.3923e-06	4.39655e-06	4.39566e-06
87242	4.3972e-06	4.39628e-06	4.40436e-06	4.39278e-06	4.39683e-06	4.39625e-06	4.39286e-06	4.39296e-06	4.39721e-06	4.39632e-06
87243	4.39786e-06	4.39693e-06	4.40502e-06	4.39344e-06	4.39749e-06	4.39691e-06	4.39352e-06	4.39362e-06	4.39787e-06	4.39697e-06
87244	4.39852e-06	4.39759e-06	4.40568e-06	4.3941e-06	4.39815e-06	4.39757e-06	4.39418e-06	4.39427e-06	4.39852e-06	4.39763e-06
87245	4.39918e-06	4.39825e-06	4.40634e-06	4.39475e-06	4.39881e-06	4.39822e-06	4.39484e-06	4.39493e-06	4.39918e-06	4.39829e-06
87246	4.39983e-06	4.39891e-06	4.407e-06	4.39541e-06	4.39946e-06	4.39888e-06	4.39549e-06	4.39559e-06	4.39984e-06	4.39895e-06
87247	4.40049e-06	4.39957e-06	4.40766e-06	4.39607e-06	4.40012e-06	4.39954e-06	4.39615e-06	4.39625e-06	4.4005e-06	4.39961e-06
87248	4.40115e-06	4.40023e-06	4.40832e-06	4.39673e-06	4.40078e-06	4.4002e-06	4.39681e-06	4.39691e-06	4.40116e-06	4.40027e-06
87249	4.40181e-06	4.40088e-06	4.40898e-06	4.39739e-06	4.40144e-06	4.40086e-06	4.39747e-06	4.39756e-06	4.40182e-06	4.40092e-06
87250	4.40247e-06	4.40154e-06	4.40964e-06	4.39804e-06	4.4021e-06	4.40152e-06	4.39812e-06	4.39822e-06	4.40248e-06	4.40158e-06
87251	4.40313e-06	4.4022e-06	4.4103e-06	4.3987e-06	4.40276e-06	4.40217e-06	4.39878e-06	4.39888e-06	4.40313e-06	4.40224e-06
87252	4.40379e-06	4.40286e-06	4.41096e-06	4.39936e-06	4.40342e-06	4.40283e-06	4.39944e-06	4.39954e-06	4.40379e-06	4.4029e-06
87253	4.40445e-06	4.40352e-06	4.41162e-06	4.40002e-06	4.40407e-06	4.40349e-06	4.4001e-06	4.4002e-06	4.40445e-06	4.40356e-06
87254	4.4051e-06	4.40418e-06	4.41228e-06	4.40068e-06	4.40473e-06	4.40415e-06	4.40076e-06	4.40085e-06	4.40511e-06	4.40422e-06
87255	4.40576e-06	4.40484e-06	4.41294e-06	4.40133e-06	4.40539e-06	4.40481e-06	4.40142e-06	4.40151e-06	4.40577e-06	4.40488e-06
87256	4.40642e-06	4.4055e-06	4.4136e-06	4.40199e-06	4.40605e-06	4.40547e-06	4.40208e-06	4.40217e-06	4.40643e-06	4.40554e-06
87257	4.40708e-06	4.40615e-06	4.41426e-06	4.40265e-06	4.40671e-06	4.40613e-06	4.40273e-06	4.40283e-06	4.40709e-06	4.40619e-06
87258	4.40774e-06	4.40681e-06	4.41492e-06	4.40331e-06	4.40737e-06	4.40679e-06	4.40339e-06	4.40349e-06	4.40775e-06	4.40685e-06
87259	4.4084e-06	4.40747e-06	4.41558e-06	4.40397e-06	4.40803e-06	4.40745e-06	4.40405e-06	4.40415e-06	4.40841e-06	4.40751e-06
87260	4.40906e-06	4.40813e-06	4.41624e-06	4.40463e-06	4.40869e-06	4.40811e-06	4.40471e-06	4.40481e-06	4.40907e-06	4.40817e-06
87261	4.40972e-06	4.40879e-06	4.4169e-06	4.40529e-06	4.40935e-06	4.40876e-06	4.40537e-06	4.40547e-06	4.40973e-06	4.40883e-06
87262	4.41038e-06	4.40945e-06	4.41756e-06	4.40595e-06	4.41001e-06	4.40942e-06	4.40603e-06	4.40613e-06	4.41039e-06	4.40949e-06
87263	4.41104e-06	4.41011e-06	4.41822e-06	4.40661e-06	4.41067e-06	4.41008e-06	4.40669e-06	4.40678e-06	4.41105e-06	4.41015e-06
87264	4.4117e-06	4.41077e-06	4.41888e-06	4.40727e-06	4.41133e-06	4.41074e-06	4.40735e-06	4.40744e-06	4.41171e-06	4.41081e-06
87265	4.41236e-06	4.41143e-06	4.41954e-06	4.40792e-06	4.41199e-06	4.4114e-06	4.40801e-06	4.4081e-06	4.41237e-06	4.41147e-06
87266	4.41302e-06	4.41209e-06	4.4202e-06	4.40858e-06	4.41265e-06	4.41206e-06	4.40867e-06	4.40876e-06	4.41303e-06	4.41213e-06
87267	4.41368e-06	4.41275e-06	4.42086e-06	4.40924e-06	4.41331e-06	4.41272e-06	4.40933e-06	4.40942e-06	4.41369e-06	4.41279e-06
87268	4.41434e-06	4.41341e-06	4.42152e-06	4.4099e-06	4.41397e-06	4.41338e-06	4.40999e-06	4.41008e-06	4.41435e-06	4.41345e-06
87269	4.415e-06	4.41407e-06	4.42219e-06	4.41056e-06	4.41463e-06	4.41404e-06	4.41064e-06	4.41074e-06	4.41501e-06	4.41411e-06
87270	4.41566e-06	4.41473e-06	4.42285e-06	4.41122e-06	4.41529e-06	4.4147e-06	4.4113e-06	4.4114e-06	4.41567e-06	4.41477e-06
87271	4.41632e-06	4.41539e-06	4.42351e-06	4.41188e-06	4.41595e-06	4.41536e-06	4.41196e-06	4.41206e-06	4.41633e-06	4.41543e-06
87272	4.41698e-06	4.41605e-06	4.42417e-06	4.41254e-06	4.41661e-06	4.41602e-06	4.41262e-06	4.41272e-06	4.41699e-06	4.41609e-06
87273	4.41764e-06	4.41671e-06	4.42483e-06	4.4132e-06	4.41727e-06	4.41669e-06	4.41328e-06	4.41338e-06	4.41765e-06	4.41675e-06
87274	4.4183e-06	4.41737e-06	4.42549e-06	4.41386e-06	4.41793e-06	4.41735e-06	4.41394e-06	4.41404e-06	4.41831e-06	4.41741e-06
87275	4.41896e-06	4.41803e-06	4.42616e-06	4.41452e-06	4.41859e-06	4.41801e-06	4.41461e-06	4.4147e-06	4.41897e-06	4.41807e-06
87276	4.41962e-06	4.41869e-06	4.42682e-06	4.41518e-06	4.41925e-06	4.41867e-06	4.41527e-06	4.41536e-06	4.41963e-06	4.41873e-06
87277	4.42029e-06	4.41936e-06	4.42748e-06	4.41584e-06	4.41991e-06	4.41933e-06	4.41593e-06	4.41602e-06	4.42029e-06	4.4194e-06
87278	4.42095e-06	4.42002e-06	4.42814e-06	4.4165e-06	4.42057e-06	4.41999e-06	4.41659e-06	4.41668e-06	4.42095e-06	4.42006e-06
87279	4.42161e-06	4.42068e-06	4.4288e-06	4.41716e-06	4.42124e-06	4.42065e-06	4.41725e-06	4.41734e-06	4.42161e-06	4.42072e-06
87280	4.42227e-06	4.42134e-06	4.42947e-06	4.41783e-06	4.4219e-06	4.42131e-06	4.41791e-06	4.418e-06	4.42228e-06	4.42138e-06
87281	4.42293e-06	4.422e-06	4.43013e-06	4.41849e-06	4.42256e-06	4.42197e-06	4.41857e-06	4.41867e-06	4.42294e-06	4.42204e-06
87282	4.42359e-06	4.42266e-06	4.43079e-06	4.41915e-06	4.42322e-06	4.42263e-06	4.41923e-06	4.41933e-06	4.4236e-06	4.4227e-06
87283	4.42425e-06	4.42332e-06	4.43145e-06	4.41981e-06	4.42388e-06	4.4233e-06	4.41989e-06	4.41999e-06	4.42426e-06	4.42336e-06
87284	4.42491e-06	4.42398e-06	4.43211e-06	4.42047e-06	4.42454e-06	4.42396e-06	4.42055e-06	4.42065e-06	4.42492e-06	4.42402e-06
87285	4.42558e-06	4.42465e-06	4.43278e-06	4.42113e-06	4.4252e-06	4.42462e-06	4.42121e-06	4.42131e-06	4.42558e-06	4.42469e-06
87286	4.42624e-06	4.42531e-06	4.43344e-06	4.42179e-06	4.42587e-06	4.42528e-06	4.42187e-06	4.42197e-06	4.42624e-06	4.42535e-06
87287	4.4269e-06	4.42597e-06	4.4341e-06	4.42245e-06	4.42653e-06	4.42594e-06	4.42253e-06	4.42263e-06	4.42691e-06	4.42601e-06
87288	4.42756e-06	4.42663e-06	4.43477e-06	4.42311e-06	4.42719e-06	4.4266e-06	4.4232e-06	4.42329e-06	4.42757e-06	4.42667e-06
87289	4.42822e-06	4.42729e-06	4.43543e-06	4.42378e-06	4.42785e-06	4.42727e-06	4.42386e-06	4.42395e-06	4.42823e-06	4.42733e-06
87290	4.42889e-06	4.42795e-06	4.43609e-06	4.42444e-06	4.42851e-06	4.42793e-06	4.42452e-06	4.42462e-06	4.42889e-06	4.42799e-06
87291	4.42955e-06	4.42862e-06	4.43675e-06	4.4251e-06	4.42918e-06	4.42859e-06	4.42518e-06	4.42528e-06	4.42955e-06	4.42866e-06
87292	4.43021e-06	4.42928e-06	4.43742e-06	4.42576e-06	4.42984e-06	4.42925e-06	4.42584e-06	4.42594e-06	4.43022e-06	4.42932e-06
87293	4.43087e-06	4.42994e-06	4.43808e-06	4.42642e-06	4.4305e-06	4.42991e-06	4.4265e-06	4.4266e-06	4.43088e-06	4.42998e-06
87294	4.43154e-06	4.4306e-06	4.43874e-06	4.42708e-06	4.43116e-06	4.43058e-06	4.42717e-06	4.42726e-06	4.43154e-06	4.43064e-06
87295	4.4322e-06	4.43127e-06	4.43941e-06	4.42775e-06	4.43182e-06	4.43124e-06	4.42783e-06	4.42792e-06	4.4322e-06	4.43131e-06
87296	4.43286e-06	4.43193e-06	4.44007e-06	4.42841e-06	4.43249e-06	4.4319e-06	4.42849e-06	4.42859e-06	4.43287e-06	4.43197e-06
87297	4.43352e-06	4.43259e-06	4.44073e-06	4.42907e-06	4.43315e-06	4.43256e-06	4.42915e-06	4.42925e-06	4.43353e-06	4.43263e-06
87298	4.43419e-06	4.43325e-06	4.4414e-06	4.42973e-06	4.43381e-06	4.43323e-06	4.42981e-06	4.42991e-06	4.43419e-06	4.43329e-06
87299	4.43485e-06	4.43392e-06	4.44206e-06	4.43039e-06	4.43448e-06	4.43389e-06	4.43048e-06	4.43057e-06	4.43486e-06	4.43396e-06
87300	4.43551e-06	4.43458e-06	4.44273e-06	4.43106e-06	4.43514e-06	4.43455e-06	4.43114e-06	4.43124e-06	4.43552e-06	4.43462e-06
87301	4.43617e-06	4.43524e-06	4.44339e-06	4.43172e-06	4.4358e-06	4.43521e-06	4.4318e-06	4.4319e-06	4.43618e-06	4.43528e-06
87302	4.43684e-06	4.4359e-06	4.44405e-06	4.43238e-06	4.43646e-06	4.43588e-06	4.43246e-06	4.43256e-06	4.43684e-06	4.43594e-06
87303	4.4375e-06	4.43657e-06	4.44472e-06	4.43304e-06	4.43713e-06	4.43654e-06	4.43313e-06	4.43322e-06	4.43751e-06	4.43661e-06
87304	4.43816e-06	4.43723e-06	4.44538e-06	4.43371e-06	4.43779e-06	4.4372e-06	4.43379e-06	4.43389e-06	4.43817e-06	4.43727e-06
87305	4.43883e-06	4.43789e-06	4.44605e-06	4.43437e-06	4.43845e-06	4.43787e-06	4.43445e-06	4.43455e-06	4.43883e-06	4.43793e-06
87306	4.43949e-06	4.43856e-06	4.44671e-06	4.43503e-06	4.43912e-06	4.43853e-06	4.43512e-06	4.43521e-06	4.4395e-06	4.4386e-06
87307	4.44015e-06	4.43922e-06	4.44738e-06	4.4357e-06	4.43978e-06	4.43919e-06	4.43578e-06	4.43588e-06	4.44016e-06	4.43926e-06
87308	4.44082e-06	4.43988e-06	4.44804e-06	4.43636e-06	4.44044e-06	4.43986e-06	4.43644e-06	4.43654e-06	4.44082e-06	4.43992e-06
87309	4.44148e-06	4.44055e-06	4.4487e-06	4.43702e-06	4.44111e-06	4.44052e-06	4.4371e-06	4.4372e-06	4.44149e-06	4.44059e-06
87310	4.44215e-06	4.44121e-06	4.44937e-06	4.43769e-06	4.44177e-06	4.44118e-06	4.43777e-06	4.43786e-06	4.44215e-06	4.44125e-06
87311	4.44281e-06	4.44188e-06	4.45003e-06	4.43835e-06	4.44244e-06	4.44185e-06	4.43843e-06	4.43853e-06	4.44282e-06	4.44192e-06
87312	4.44347e-06	4.44254e-06	4.4507e-06	4.43901e-06	4.4431e-06	4.44251e-06	4.43909e-06	4.43919e-06	4.44348e-06	4.44258e-06
87313	4.44414e-06	4.4432e-06	4.45136e-06	4.43968e-06	4.44376e-06	4.44318e-06	4.43976e-06	4.43985e-06	4.44414e-06	4.44324e-06
87314	4.4448e-06	4.44387e-06	4.45203e-06	4.44034e-06	4.44443e-06	4.44384e-06	4.44042e-06	4.44052e-06	4.44481e-06	4.44391e-06
87315	4.44547e-06	4.44453e-06	4.45269e-06	4.441e-06	4.44509e-06	4.4445e-06	4.44109e-06	4.44118e-06	4.44547e-06	4.44457e-06
87316	4.44613e-06	4.4452e-06	4.45336e-06	4.44167e-06	4.44576e-06	4.44517e-06	4.44175e-06	4.44185e-06	4.44614e-06	4.44524e-06
87317	4.44679e-06	4.44586e-06	4.45402e-06	4.44233e-06	4.44642e-06	4.44583e-06	4.44241e-06	4.44251e-06	4.4468e-06	4.4459e-06
87318	4.44746e-06	4.44652e-06	4.45469e-06	4.44299e-06	4.44708e-06	4.4465e-06	4.44308e-06	4.44317e-06	4.44747e-06	4.44656e-06
87319	4.44812e-06	4.44719e-06	4.45535e-06	4.44366e-06	4.44775e-06	4.44716e-06	4.44374e-06	4.44384e-06	4.44813e-06	4.44723e-06
87320	4.44879e-06	4.44785e-06	4.45602e-06	4.44432e-06	4.44841e-06	4.44783e-06	4.4444e-06	4.4445e-06	4.44879e-06	4.44789e-06
87321	4.44945e-06	4.44852e-06	4.45669e-06	4.44499e-06	4.44908e-06	4.44849e-06	4.44507e-06	4.44517e-06	4.44946e-06	4.44856e-06
87322	4.45012e-06	4.44918e-06	4.45735e-06	4.44565e-06	4.44974e-06	4.44915e-06	4.44573e-06	4.44583e-06	4.45012e-06	4.44922e-06
87323	4.45078e-06	4.44985e-06	4.45802e-06	4.44631e-06	4.45041e-06	4.44982e-06	4.4464e-06	4.44649e-06	4.45079e-06	4.44989e-06
87324	4.45145e-06	4.45051e-06	4.45868e-06	4.44698e-06	4.45107e-06	4.45048e-06	4.44706e-06	4.44716e-06	4.45145e-06	4.45055e-06
87325	4.45211e-06	4.45118e-06	4.45935e-06	4.44764e-06	4.45174e-06	4.45115e-06	4.44773e-06	4.44782e-06	4.45212e-06	4.45122e-06
87326	4.45278e-06	4.45184e-06	4.46001e-06	4.44831e-06	4.4524e-06	4.45181e-06	4.44839e-06	4.44849e-06	4.45278e-06	4.45188e-06
87327	4.45344e-06	4.45251e-06	4.46068e-06	4.44897e-06	4.45307e-06	4.45248e-06	4.44906e-06	4.44915e-06	4.45345e-06	4.45255e-06
87328	4.45411e-06	4.45317e-06	4.46135e-06	4.44964e-06	4.45373e-06	4.45314e-06	4.44972e-06	4.44982e-06	4.45411e-06	4.45321e-06
87329	4.45477e-06	4.45384e-06	4.46201e-06	4.4503e-06	4.4544e-06	4.45381e-06	4.45038e-06	4.45048e-06	4.45478e-06	4.45388e-06
87330	4.45544e-06	4.4545e-06	4.46268e-06	4.45097e-06	4.45506e-06	4.45447e-06	4.45105e-06	4.45115e-06	4.45544e-06	4.45454e-06
87331	4.4561e-06	4.45517e-06	4.46335e-06	4.45163e-06	4.45573e-06	4.45514e-06	4.45171e-06	4.45181e-06	4.45611e-06	4.45521e-06
87332	4.45677e-06	4.45583e-06	4.46401e-06	4.4523e-06	4.45639e-06	4.45581e-06	4.45238e-06	4.45248e-06	4.45678e-06	4.45587e-06
87333	4.45743e-06	4.4565e-06	4.46468e-06	4.45296e-06	4.45706e-06	4.45647e-06	4.45304e-06	4.45314e-06	4.45744e-06	4.45654e-06
87334	4.4581e-06	4.45716e-06	4.46535e-06	4.45363e-06	4.45773e-06	4.45714e-06	4.45371e-06	4.45381e-06	4.45811e-06	4.4572e-06
87335	4.45877e-06	4.45783e-06	4.46601e-06	4.45429e-06	4.45839e-06	4.4578e-06	4.45438e-06	4.45447e-06	4.45877e-06	4.45787e-06
87336	4.45943e-06	4.4585e-06	4.46668e-06	4.45496e-06	4.45906e-06	4.45847e-06	4.45504e-06	4.45514e-06	4.45944e-06	4.45854e-06
87337	4.4601e-06	4.45916e-06	4.46735e-06	4.45562e-06	4.45972e-06	4.45913e-06	4.45571e-06	4.4558e-06	4.4601e-06	4.4592e-06
87338	4.46076e-06	4.45983e-06	4.46801e-06	4.45629e-06	4.46039e-06	4.4598e-06	4.45637e-06	4.45647e-06	4.46077e-06	4.45987e-06
87339	4.46143e-06	4.46049e-06	4.46868e-06	4.45695e-06	4.46106e-06	4.46047e-06	4.45704e-06	4.45713e-06	4.46144e-06	4.46053e-06
87340	4.4621e-06	4.46116e-06	4.46935e-06	4.45762e-06	4.46172e-06	4.46113e-06	4.4577e-06	4.4578e-06	4.4621e-06	4.4612e-06
87341	4.46276e-06	4.46183e-06	4.47001e-06	4.45829e-06	4.46239e-06	4.4618e-06	4.45837e-06	4.45847e-06	4.46277e-06	4.46187e-06
87342	4.46343e-06	4.46249e-06	4.47068e-06	4.45895e-06	4.46305e-06	4.46246e-06	4.45903e-06	4.45913e-06	4.46344e-06	4.46253e-06
87343	4.4641e-06	4.46316e-06	4.47135e-06	4.45962e-06	4.46372e-06	4.46313e-06	4.4597e-06	4.4598e-06	4.4641e-06	4.4632e-06
87344	4.46476e-06	4.46382e-06	4.47202e-06	4.46028e-06	4.46439e-06	4.4638e-06	4.46037e-06	4.46046e-06	4.46477e-06	4.46386e-06
87345	4.46543e-06	4.46449e-06	4.47268e-06	4.46095e-06	4.46505e-06	4.46446e-06	4.46103e-06	4.46113e-06	4.46544e-06	4.46453e-06
87346	4.4661e-06	4.46516e-06	4.47335e-06	4.46162e-06	4.46572e-06	4.46513e-06	4.4617e-06	4.4618e-06	4.4661e-06	4.4652e-06
87347	4.46676e-06	4.46582e-06	4.47402e-06	4.46228e-06	4.46639e-06	4.4658e-06	4.46236e-06	4.46246e-06	4.46677e-06	4.46586e-06
87348	4.46743e-06	4.46649e-06	4.47469e-06	4.46295e-06	4.46705e-06	4.46646e-06	4.46303e-06	4.46313e-06	4.46744e-06	4.46653e-06
87349	4.4681e-06	4.46716e-06	4.47535e-06	4.46361e-06	4.46772e-06	4.46713e-06	4.4637e-06	4.46379e-06	4.4681e-06	4.4672e-06
87350	4.46876e-06	4.46782e-06	4.47602e-06	4.46428e-06	4.46839e-06	4.4678e-06	4.46436e-06	4.46446e-06	4.46877e-06	4.46787e-06
87351	4.46943e-06	4.46849e-06	4.47669e-06	4.46495e-06	4.46905e-06	4.46846e-06	4.46503e-06	4.46513e-06	4.46944e-06	4.46853e-06
87352	4.4701e-06	4.46916e-06	4.47736e-06	4.46561e-06	4.46972e-06	4.46913e-06	4.4657e-06	4.46579e-06	4.4701e-06	4.4692e-06
87353	4.47076e-06	4.46983e-06	4.47803e-06	4.46628e-06	4.47039e-06	4.4698e-06	4.46636e-06	4.46646e-06	4.47077e-06	4.46987e-06
87354	4.47143e-06	4.47049e-06	4.47869e-06	4.46695e-06	4.47106e-06	4.47047e-06	4.46703e-06	4.46713e-06	4.47144e-06	4.47053e-06
87355	4.4721e-06	4.47116e-06	4.47936e-06	4.46761e-06	4.47172e-06	4.47113e-06	4.4677e-06	4.46779e-06	4.47211e-06	4.4712e-06
87356	4.47277e-06	4.47183e-06	4.48003e-06	4.46828e-06	4.47239e-06	4.4718e-06	4.46836e-06	4.46846e-06	4.47277e-06	4.47187e-06
87357	4.47343e-06	4.4725e-06	4.4807e-06	4.46895e-06	4.47306e-06	4.47247e-06	4.46903e-06	4.46913e-06	4.47344e-06	4.47254e-06
87358	4.4741e-06	4.47316e-06	4.48137e-06	4.46962e-06	4.47373e-06	4.47314e-06	4.4697e-06	4.4698e-06	4.47411e-06	4.4732e-06
87359	4.47477e-06	4.47383e-06	4.48204e-06	4.47028e-06	4.47439e-06	4.4738e-06	4.47037e-06	4.47046e-06	4.47478e-06	4.47387e-06
87360	4.47544e-06	4.4745e-06	4.4827e-06	4.47095e-06	4.47506e-06	4.47447e-06	4.47103e-06	4.47113e-06	4.47544e-06	4.47454e-06
87361	4.47611e-06	4.47517e-06	4.48337e-06	4.47162e-06	4.47573e-06	4.47514e-06	4.4717e-06	4.4718e-06	4.47611e-06	4.47521e-06
87362	4.47677e-06	4.47583e-06	4.48404e-06	4.47228e-06	4.4764e-06	4.47581e-06	4.47237e-06	4.47246e-06	4.47678e-06	4.47587e-06
87363	4.47744e-06	4.4765e-06	4.48471e-06	4.47295e-06	4.47706e-06	4.47647e-06	4.47303e-06	4.47313e-06	4.47745e-06	4.47654e-06
87364	4.47811e-06	4.47717e-06	4.48538e-06	4.47362e-06	4.47773e-06	4.47714e-06	4.4737e-06	4.4738e-06	4.47812e-06	4.47721e-06
87365	4.47878e-06	4.47784e-06	4.48605e-06	4.47429e-06	4.4784e-06	4.47781e-06	4.47437e-06	4.47447e-06	4.47878e-06	4.47788e-06
87366	4.47945e-06	4.47851e-06	4.48672e-06	4.47496e-06	4.47907e-06	4.47848e-06	4.47504e-06	4.47514e-06	4.47945e-06	4.47855e-06
87367	4.48011e-06	4.47917e-06	4.48739e-06	4.47562e-06	4.47974e-06	4.47915e-06	4.47571e-06	4.4758e-06	4.48012e-06	4.47921e-06
87368	4.48078e-06	4.47984e-06	4.48805e-06	4.47629e-06	4.48041e-06	4.47981e-06	4.47637e-06	4.47647e-06	4.48079e-06	4.47988e-06
87369	4.48145e-06	4.48051e-06	4.48872e-06	4.47696e-06	4.48107e-06	4.48048e-06	4.47704e-06	4.47714e-06	4.48146e-06	4.48055e-06
87370	4.48212e-06	4.48118e-06	4.48939e-06	4.47763e-06	4.48174e-06	4.48115e-06	4.47771e-06	4.47781e-06	4.48213e-06	4.48122e-06
87371	4.48279e-06	4.48185e-06	4.49006e-06	4.47829e-06	4.48241e-06	4.48182e-06	4.47838e-06	4.47847e-06	4.48279e-06	4.48189e-06
87372	4.48346e-06	4.48252e-06	4.49073e-06	4.47896e-06	4.48308e-06	4.48249e-06	4.47905e-06	4.47914e-06	4.48346e-06	4.48256e-06
87373	4.48412e-06	4.48318e-06	4.4914e-06	4.47963e-06	4.48375e-06	4.48316e-06	4.47971e-06	4.47981e-06	4.48413e-06	4.48322e-06
87374	4.48479e-06	4.48385e-06	4.49207e-06	4.4803e-06	4.48442e-06	4.48383e-06	4.48038e-06	4.48048e-06	4.4848e-06	4.48389e-06
87375	4.48546e-06	4.48452e-06	4.49274e-06	4.48097e-06	4.48509e-06	4.48449e-06	4.48105e-06	4.48115e-06	4.48547e-06	4.48456e-06
87376	4.48613e-06	4.48519e-06	4.49341e-06	4.48164e-06	4.48575e-06	4.48516e-06	4.48172e-06	4.48182e-06	4.48614e-06	4.48523e-06
87377	4.4868e-06	4.48586e-06	4.49408e-06	4.4823e-06	4.48642e-06	4.48583e-06	4.48239e-06	4.48248e-06	4.48681e-06	4.4859e-06
87378	4.48747e-06	4.48653e-06	4.49475e-06	4.48297e-06	4.48709e-06	4.4865e-06	4.48306e-06	4.48315e-06	4.48748e-06	4.48657e-06
87379	4.48814e-06	4.4872e-06	4.49542e-06	4.48364e-06	4.48776e-06	4.48717e-06	4.48372e-06	4.48382e-06	4.48815e-06	4.48724e-06
87380	4.48881e-06	4.48787e-06	4.49609e-06	4.48431e-06	4.48843e-06	4.48784e-06	4.48439e-06	4.48449e-06	4.48881e-06	4.48791e-06
87381	4.48948e-06	4.48854e-06	4.49676e-06	4.48498e-06	4.4891e-06	4.48851e-06	4.48506e-06	4.48516e-06	4.48948e-06	4.48858e-06
87382	4.49015e-06	4.48921e-06	4.49743e-06	4.48565e-06	4.48977e-06	4.48918e-06	4.48573e-06	4.48583e-06	4.49015e-06	4.48925e-06
87383	4.49082e-06	4.48987e-06	4.4981e-06	4.48632e-06	4.49044e-06	4.48985e-06	4.4864e-06	4.4865e-06	4.49082e-06	4.48991e-06
87384	4.49149e-06	4.49054e-06	4.49877e-06	4.48699e-06	4.49111e-06	4.49052e-06	4.48707e-06	4.48717e-06	4.49149e-06	4.49058e-06
87385	4.49216e-06	4.49121e-06	4.49944e-06	4.48766e-06	4.49178e-06	4.49119e-06	4.48774e-06	4.48784e-06	4.49216e-06	4.49125e-06
87386	4.49283e-06	4.49188e-06	4.50011e-06	4.48832e-06	4.49245e-06	4.49186e-06	4.48841e-06	4.4885e-06	4.49283e-06	4.49192e-06
87387	4.49349e-06	4.49255e-06	4.50078e-06	4.48899e-06	4.49312e-06	4.49253e-06	4.48908e-06	4.48917e-06	4.4935e-06	4.49259e-06
87388	4.49416e-06	4.49322e-06	4.50145e-06	4.48966e-06	4.49379e-06	4.49319e-06	4.48975e-06	4.48984e-06	4.49417e-06	4.49326e-06
87389	4.49483e-06	4.49389e-06	4.50212e-06	4.49033e-06	4.49446e-06	4.49386e-06	4.49042e-06	4.49051e-06	4.49484e-06	4.49393e-06
87390	4.4955e-06	4.49456e-06	4.50279e-06	4.491e-06	4.49513e-06	4.49453e-06	4.49109e-06	4.49118e-06	4.49551e-06	4.4946e-06
87391	4.49617e-06	4.49523e-06	4.50347e-06	4.49167e-06	4.4958e-06	4.4952e-06	4.49175e-06	4.49185e-06	4.49618e-06	4.49527e-06
87392	4.49684e-06	4.4959e-06	4.50414e-06	4.49234e-06	4.49647e-06	4.49587e-06	4.49242e-06	4.49252e-06	4.49685e-06	4.49594e-06
87393	4.49751e-06	4.49657e-06	4.50481e-06	4.49301e-06	4.49714e-06	4.49654e-06	4.49309e-06	4.49319e-06	4.49752e-06	4.49661e-06
87394	4.49819e-06	4.49724e-06	4.50548e-06	4.49368e-06	4.49781e-06	4.49721e-06	4.49376e-06	4.49386e-06	4.49819e-06	4.49728e-06
87395	4.49886e-06	4.49791e-06	4.50615e-06	4.49435e-06	4.49848e-06	4.49788e-06	4.49443e-06	4.49453e-06	4.49886e-06	4.49795e-06
87396	4.49953e-06	4.49858e-06	4.50682e-06	4.49502e-06	4.49915e-06	4.49856e-06	4.4951e-06	4.4952e-06	4.49953e-06	4.49862e-06
87397	4.5002e-06	4.49925e-06	4.50749e-06	4.49569e-06	4.49982e-06	4.49923e-06	4.49577e-06	4.49587e-06	4.5002e-06	4.49929e-06
87398	4.50087e-06	4.49992e-06	4.50816e-06	4.49636e-06	4.50049e-06	4.4999e-06	4.49644e-06	4.49654e-06	4.50087e-06	4.49996e-06
87399	4.50154e-06	4.50059e-06	4.50883e-06	4.49703e-06	4.50116e-06	4.50057e-06	4.49711e-06	4.49721e-06	4.50154e-06	4.50063e-06
87400	4.50221e-06	4.50126e-06	4.50951e-06	4.4977e-06	4.50183e-06	4.50124e-06	4.49778e-06	4.49788e-06	4.50221e-06	4.50131e-06
87401	4.50288e-06	4.50194e-06	4.51018e-06	4.49837e-06	4.5025e-06	4.50191e-06	4.49845e-06	4.49855e-06	4.50289e-06	4.50198e-06
87402	4.50355e-06	4.50261e-06	4.51085e-06	4.49904e-06	4.50317e-06	4.50258e-06	4.49912e-06	4.49922e-06	4.50356e-06	4.50265e-06
87403	4.50422e-06	4.50328e-06	4.51152e-06	4.49971e-06	4.50384e-06	4.50325e-06	4.4998e-06	4.49989e-06	4.50423e-06	4.50332e-06
87404	4.50489e-06	4.50395e-06	4.51219e-06	4.50038e-06	4.50451e-06	4.50392e-06	4.50047e-06	4.50056e-06	4.5049e-06	4.50399e-06
87405	4.50556e-06	4.50462e-06	4.51286e-06	4.50105e-06	4.50518e-06	4.50459e-06	4.50114e-06	4.50123e-06	4.50557e-06	4.50466e-06
87406	4.50623e-06	4.50529e-06	4.51354e-06	4.50172e-06	4.50586e-06	4.50526e-06	4.50181e-06	4.5019e-06	4.50624e-06	4.50533e-06
87407	4.5069e-06	4.50596e-06	4.51421e-06	4.50239e-06	4.50653e-06	4.50593e-06	4.50248e-06	4.50257e-06	4.50691e-06	4.506e-06
87408	4.50758e-06	4.50663e-06	4.51488e-06	4.50307e-06	4.5072e-06	4.5066e-06	4.50315e-06	4.50325e-06	4.50758e-06	4.50667e-06
87409	4.50825e-06	4.5073e-06	4.51555e-06	4.50374e-06	4.50787e-06	4.50728e-06	4.50382e-06	4.50392e-06	4.50825e-06	4.50734e-06
87410	4.50892e-06	4.50797e-06	4.51622e-06	4.50441e-06	4.50854e-06	4.50795e-06	4.50449e-06	4.50459e-06	4.50893e-06	4.50801e-06
87411	4.50959e-06	4.50865e-06	4.5169e-06	4.50508e-06	4.50921e-06	4.50862e-06	4.50516e-06	4.50526e-06	4.5096e-06	4.50869e-06
87412	4.51026e-06	4.50932e-06	4.51757e-06	4.50575e-06	4.50988e-06	4.50929e-06	4.50583e-06	4.50593e-06	4.51027e-06	4.50936e-06
87413	4.51093e-06	4.50999e-06	4.51824e-06	4.50642e-06	4.51056e-06	4.50996e-06	4.5065e-06	4.5066e-06	4.51094e-06	4.51003e-06
87414	4.5116e-06	4.51066e-06	4.51891e-06	4.50709e-06	4.51123e-06	4.51063e-06	4.50717e-06	4.50727e-06	4.51161e-06	4.5107e-06
87415	4.51228e-06	4.51133e-06	4.51959e-06	4.50776e-06	4.5119e-06	4.5113e-06	4.50785e-06	4.50794e-06	4.51228e-06	4.51137e-06
87416	4.51295e-06	4.512e-06	4.52026e-06	4.50843e-06	4.51257e-06	4.51198e-06	4.50852e-06	4.50861e-06	4.51295e-06	4.51204e-06
87417	4.51362e-06	4.51268e-06	4.52093e-06	4.50911e-06	4.51324e-06	4.51265e-06	4.50919e-06	4.50929e-06	4.51363e-06	4.51272e-06
87418	4.51429e-06	4.51335e-06	4.5216e-06	4.50978e-06	4.51391e-06	4.51332e-06	4.50986e-06	4.50996e-06	4.5143e-06	4.51339e-06
87419	4.51496e-06	4.51402e-06	4.52228e-06	4.51045e-06	4.51459e-06	4.51399e-06	4.51053e-06	4.51063e-06	4.51497e-06	4.51406e-06
87420	4.51564e-06	4.51469e-06	4.52295e-06	4.51112e-06	4.51526e-06	4.51466e-06	4.5112e-06	4.5113e-06	4.51564e-06	4.51473e-06
87421	4.51631e-06	4.51536e-06	4.52362e-06	4.51179e-06	4.51593e-06	4.51533e-06	4.51187e-06	4.51197e-06	4.51631e-06	4.5154e-06
87422	4.51698e-06	4.51603e-06	4.52429e-06	4.51246e-06	4.5166e-06	4.51601e-06	4.51255e-06	4.51264e-06	4.51699e-06	4.51608e-06
87423	4.51765e-06	4.51671e-06	4.52497e-06	4.51314e-06	4.51727e-06	4.51668e-06	4.51322e-06	4.51332e-06	4.51766e-06	4.51675e-06
87424	4.51832e-06	4.51738e-06	4.52564e-06	4.51381e-06	4.51795e-06	4.51735e-06	4.51389e-06	4.51399e-06	4.51833e-06	4.51742e-06
87425	4.519e-06	4.51805e-06	4.52631e-06	4.51448e-06	4.51862e-06	4.51802e-06	4.51456e-06	4.51466e-06	4.519e-06	4.51809e-06
87426	4.51967e-06	4.51872e-06	4.52699e-06	4.51515e-06	4.51929e-06	4.5187e-06	4.51523e-06	4.51533e-06	4.51968e-06	4.51876e-06
87427	4.52034e-06	4.5194e-06	4.52766e-06	4.51582e-06	4.51996e-06	4.51937e-06	4.51591e-06	4.516e-06	4.52035e-06	4.51944e-06
87428	4.52101e-06	4.52007e-06	4.52833e-06	4.51649e-06	4.52064e-06	4.52004e-06	4.51658e-06	4.51668e-06	4.52102e-06	4.52011e-06
87429	4.52169e-06	4.52074e-06	4.52901e-06	4.51717e-06	4.52131e-06	4.52071e-06	4.51725e-06	4.51735e-06	4.52169e-06	4.52078e-06
87430	4.52236e-06	4.52141e-06	4.52968e-06	4.51784e-06	4.52198e-06	4.52139e-06	4.51792e-06	4.51802e-06	4.52237e-06	4.52145e-06
87431	4.52303e-06	4.52209e-06	4.53035e-06	4.51851e-06	4.52265e-06	4.52206e-06	4.51859e-06	4.51869e-06	4.52304e-06	4.52213e-06
87432	4.52371e-06	4.52276e-06	4.53103e-06	4.51918e-06	4.52333e-06	4.52273e-06	4.51927e-06	4.51936e-06	4.52371e-06	4.5228e-06
87433	4.52438e-06	4.52343e-06	4.5317e-06	4.51986e-06	4.524e-06	4.5234e-06	4.51994e-06	4.52004e-06	4.52438e-06	4.52347e-06
87434	4.52505e-06	4.5241e-06	4.53237e-06	4.52053e-06	4.52467e-06	4.52408e-06	4.52061e-06	4.52071e-06	4.52506e-06	4.52414e-06
87435	4.52572e-06	4.52478e-06	4.53305e-06	4.5212e-06	4.52534e-06	4.52475e-06	4.52128e-06	4.52138e-06	4.52573e-06	4.52482e-06
87436	4.5264e-06	4.52545e-06	4.53372e-06	4.52187e-06	4.52602e-06	4.52542e-06	4.52196e-06	4.52205e-06	4.5264e-06	4.52549e-06
87437	4.52707e-06	4.52612e-06	4.53439e-06	4.52255e-06	4.52669e-06	4.5261e-06	4.52263e-06	4.52273e-06	4.52708e-06	4.52616e-06
87438	4.52774e-06	4.5268e-06	4.53507e-06	4.52322e-06	4.52736e-06	4.52677e-06	4.5233e-06	4.5234e-06	4.52775e-06	4.52684e-06
87439	4.52842e-06	4.52747e-06	4.53574e-06	4.52389e-06	4.52804e-06	4.52744e-06	4.52397e-06	4.52407e-06	4.52842e-06	4.52751e-06
87440	4.52909e-06	4.52814e-06	4.53641e-06	4.52457e-06	4.52871e-06	4.52811e-06	4.52465e-06	4.52475e-06	4.5291e-06	4.52818e-06
87441	4.52976e-06	4.52882e-06	4.53709e-06	4.52524e-06	4.52938e-06	4.52879e-06	4.52532e-06	4.52542e-06	4.52977e-06	4.52886e-06
87442	4.53044e-06	4.52949e-06	4.53776e-06	4.52591e-06	4.53006e-06	4.52946e-06	4.52599e-06	4.52609e-06	4.53044e-06	4.52953e-06
87443	4.53111e-06	4.53016e-06	4.53844e-06	4.52658e-06	4.53073e-06	4.53013e-06	4.52667e-06	4.52676e-06	4.53112e-06	4.5302e-06
87444	4.53178e-06	4.53084e-06	4.53911e-06	4.52726e-06	4.5314e-06	4.53081e-06	4.52734e-06	4.52744e-06	4.53179e-06	4.53088e-06
87445	4.53246e-06	4.53151e-06	4.53979e-06	4.52793e-06	4.53208e-06	4.53148e-06	4.52801e-06	4.52811e-06	4.53246e-06	4.53155e-06
87446	4.53313e-06	4.53218e-06	4.54046e-06	4.5286e-06	4.53275e-06	4.53216e-06	4.52869e-06	4.52878e-06	4.53314e-06	4.53222e-06
87447	4.5338e-06	4.53286e-06	4.54113e-06	4.52928e-06	4.53342e-06	4.53283e-06	4.52936e-06	4.52946e-06	4.53381e-06	4.5329e-06
87448	4.53448e-06	4.53353e-06	4.54181e-06	4.52995e-06	4.5341e-06	4.5335e-06	4.53003e-06	4.53013e-06	4.53448e-06	4.53357e-06
87449	4.53515e-06	4.5342e-06	4.54248e-06	4.53062e-06	4.53477e-06	4.53418e-06	4.53071e-06	4.5308e-06	4.53516e-06	4.53424e-06
87450	4.53583e-06	4.53488e-06	4.54316e-06	4.5313e-06	4.53545e-06	4.53485e-06	4.53138e-06	4.53148e-06	4.53583e-06	4.53492e-06
87451	4.5365e-06	4.53555e-06	4.54383e-06	4.53197e-06	4.53612e-06	4.53552e-06	4.53205e-06	4.53215e-06	4.53651e-06	4.53559e-06
87452	4.53717e-06	4.53623e-06	4.54451e-06	4.53264e-06	4.53679e-06	4.5362e-06	4.53273e-06	4.53282e-06	4.53718e-06	4.53627e-06
87453	4.53785e-06	4.5369e-06	4.54518e-06	4.53332e-06	4.53747e-06	4.53687e-06	4.5334e-06	4.5335e-06	4.53785e-06	4.53694e-06
87454	4.53852e-06	4.53757e-06	4.54586e-06	4.53399e-06	4.53814e-06	4.53755e-06	4.53407e-06	4.53417e-06	4.53853e-06	4.53761e-06
87455	4.5392e-06	4.53825e-06	4.54653e-06	4.53467e-06	4.53882e-06	4.53822e-06	4.53475e-06	4.53485e-06	4.5392e-06	4.53829e-06
87456	4.53987e-06	4.53892e-06	4.5472e-06	4.53534e-06	4.53949e-06	4.53889e-06	4.53542e-06	4.53552e-06	4.53988e-06	4.53896e-06
87457	4.54054e-06	4.5396e-06	4.54788e-06	4.53601e-06	4.54016e-06	4.53957e-06	4.5361e-06	4.53619e-06	4.54055e-06	4.53964e-06
87458	4.54122e-06	4.54027e-06	4.54855e-06	4.53669e-06	4.54084e-06	4.54024e-06	4.53677e-06	4.53687e-06	4.54122e-06	4.54031e-06
87459	4.54189e-06	4.54094e-06	4.54923e-06	4.53736e-06	4.54151e-06	4.54092e-06	4.53744e-06	4.53754e-06	4.5419e-06	4.54098e-06
87460	4.54257e-06	4.54162e-06	4.5499e-06	4.53803e-06	4.54219e-06	4.54159e-06	4.53812e-06	4.53821e-06	4.54257e-06	4.54166e-06
87461	4.54324e-06	4.54229e-06	4.55058e-06	4.53871e-06	4.54286e-06	4.54226e-06	4.53879e-06	4.53889e-06	4.54325e-06	4.54233e-06
87462	4.54392e-06	4.54297e-06	4.55125e-06	4.53938e-06	4.54354e-06	4.54294e-06	4.53947e-06	4.53956e-06	4.54392e-06	4.54301e-06
87463	4.54459e-06	4.54364e-06	4.55193e-06	4.54006e-06	4.54421e-06	4.54361e-06	4.54014e-06	4.54024e-06	4.5446e-06	4.54368e-06
87464	4.54527e-06	4.54432e-06	4.5526e-06	4.54073e-06	4.54489e-06	4.54429e-06	4.54081e-06	4.54091e-06	4.54527e-06	4.54436e-06
87465	4.54594e-06	4.54499e-06	4.55328e-06	4.54141e-06	4.54556e-06	4.54496e-06	4.54149e-06	4.54159e-06	4.54595e-06	4.54503e-06
87466	4.54661e-06	4.54567e-06	4.55396e-06	4.54208e-06	4.54623e-06	4.54564e-06	4.54216e-06	4.54226e-06	4.54662e-06	4.54571e-06
87467	4.54729e-06	4.54634e-06	4.55463e-06	4.54275e-06	4.54691e-06	4.54631e-06	4.54284e-06	4.54293e-06	4.5473e-06	4.54638e-06
87468	4.54796e-06	4.54701e-06	4.55531e-06	4.54343e-06	4.54758e-06	4.54699e-06	4.54351e-06	4.54361e-06	4.54797e-06	4.54706e-06
87469	4.54864e-06	4.54769e-06	4.55598e-06	4.5441e-06	4.54826e-06	4.54766e-06	4.54419e-06	4.54428e-06	4.54865e-06	4.54773e-06
87470	4.54931e-06	4.54836e-06	4.55666e-06	4.54478e-06	4.54893e-06	4.54834e-06	4.54486e-06	4.54496e-06	4.54932e-06	4.54841e-06
87471	4.54999e-06	4.54904e-06	4.55733e-06	4.54545e-06	4.54961e-06	4.54901e-06	4.54553e-06	4.54563e-06	4.55e-06	4.54908e-06
87472	4.55066e-06	4.54971e-06	4.55801e-06	4.54613e-06	4.55028e-06	4.54969e-06	4.54621e-06	4.54631e-06	4.55067e-06	4.54976e-06
87473	4.55134e-06	4.55039e-06	4.55868e-06	4.5468e-06	4.55096e-06	4.55036e-06	4.54688e-06	4.54698e-06	4.55135e-06	4.55043e-06
87474	4.55201e-06	4.55106e-06	4.55936e-06	4.54748e-06	4.55163e-06	4.55104e-06	4.54756e-06	4.54766e-06	4.55202e-06	4.55111e-06
87475	4.55269e-06	4.55174e-06	4.56003e-06	4.54815e-06	4.55231e-06	4.55171e-06	4.54823e-06	4.54833e-06	4.5527e-06	4.55178e-06
87476	4.55336e-06	4.55241e-06	4.56071e-06	4.54883e-06	4.55298e-06	4.55239e-06	4.54891e-06	4.54901e-06	4.55337e-06	4.55246e-06
87477	4.55404e-06	4.55309e-06	4.56139e-06	4.5495e-06	4.55366e-06	4.55306e-06	4.54958e-06	4.54968e-06	4.55405e-06	4.55313e-06
87478	4.55472e-06	4.55377e-06	4.56206e-06	4.55018e-06	4.55433e-06	4.55374e-06	4.55026e-06	4.55036e-06	4.55472e-06	4.55381e-06
87479	4.55539e-06	4.55444e-06	4.56274e-06	4.55085e-06	4.55501e-06	4.55441e-06	4.55093e-06	4.55103e-06	4.5554e-06	4.55448e-06
87480	4.55607e-06	4.55512e-06	4.56341e-06	4.55153e-06	4.55569e-06	4.55509e-06	4.55161e-06	4.55171e-06	4.55607e-06	4.55516e-06
87481	4.55674e-06	4.55579e-06	4.56409e-06	4.5522e-06	4.55636e-06	4.55576e-06	4.55228e-06	4.55238e-06	4.55675e-06	4.55583e-06
87482	4.55742e-06	4.55647e-06	4.56477e-06	4.55288e-06	4.55704e-06	4.55644e-06	4.55296e-06	4.55306e-06	4.55742e-06	4.55651e-06
87483	4.55809e-06	4.55714e-06	4.56544e-06	4.55355e-06	4.55771e-06	4.55711e-06	4.55363e-06	4.55373e-06	4.5581e-06	4.55718e-06
87484	4.55877e-06	4.55782e-06	4.56612e-06	4.55423e-06	4.55839e-06	4.55779e-06	4.55431e-06	4.55441e-06	4.55877e-06	4.55786e-06
87485	4.55944e-06	4.55849e-06	4.56679e-06	4.5549e-06	4.55906e-06	4.55847e-06	4.55498e-06	4.55508e-06	4.55945e-06	4.55853e-06
87486	4.56012e-06	4.55917e-06	4.56747e-06	4.55558e-06	4.55974e-06	4.55914e-06	4.55566e-06	4.55576e-06	4.56013e-06	4.55921e-06
87487	4.5608e-06	4.55984e-06	4.56815e-06	4.55625e-06	4.56041e-06	4.55982e-06	4.55633e-06	4.55643e-06	4.5608e-06	4.55989e-06
87488	4.56147e-06	4.56052e-06	4.56882e-06	4.55693e-06	4.56109e-06	4.56049e-06	4.55701e-06	4.55711e-06	4.56148e-06	4.56056e-06
87489	4.56215e-06	4.5612e-06	4.5695e-06	4.5576e-06	4.56177e-06	4.56117e-06	4.55769e-06	4.55778e-06	4.56215e-06	4.56124e-06
87490	4.56282e-06	4.56187e-06	4.57018e-06	4.55828e-06	4.56244e-06	4.56184e-06	4.55836e-06	4.55846e-06	4.56283e-06	4.56191e-06
87491	4.5635e-06	4.56255e-06	4.57085e-06	4.55896e-06	4.56312e-06	4.56252e-06	4.55904e-06	4.55914e-06	4.5635e-06	4.56259e-06
87492	4.56417e-06	4.56322e-06	4.57153e-06	4.55963e-06	4.56379e-06	4.5632e-06	4.55971e-06	4.55981e-06	4.56418e-06	4.56326e-06
87493	4.56485e-06	4.5639e-06	4.5722e-06	4.56031e-06	4.56447e-06	4.56387e-06	4.56039e-06	4.56049e-06	4.56486e-06	4.56394e-06
87494	4.56553e-06	4.56458e-06	4.57288e-06	4.56098e-06	4.56515e-06	4.56455e-06	4.56106e-06	4.56116e-06	4.56553e-06	4.56462e-06
87495	4.5662e-06	4.56525e-06	4.57356e-06	4.56166e-06	4.56582e-06	4.56522e-06	4.56174e-06	4.56184e-06	4.56621e-06	4.56529e-06
87496	4.56688e-06	4.56593e-06	4.57423e-06	4.56233e-06	4.5665e-06	4.5659e-06	4.56242e-06	4.56251e-06	4.56689e-06	4.56597e-06
87497	4.56755e-06	4.5666e-06	4.57491e-06	4.56301e-06	4.56717e-06	4.56658e-06	4.56309e-06	4.56319e-06	4.56756e-06	4.56664e-06
87498	4.56823e-06	4.56728e-06	4.57559e-06	4.56369e-06	4.56785e-06	4.56725e-06	4.56377e-06	4.56387e-06	4.56824e-06	4.56732e-06
87499	4.56891e-06	4.56796e-06	4.57626e-06	4.56436e-06	4.56853e-06	4.56793e-06	4.56444e-06	4.56454e-06	4.56891e-06	4.568e-06
87500	4.56958e-06	4.56863e-06	4.57694e-06	4.56504e-06	4.5692e-06	4.5686e-06	4.56512e-06	4.56522e-06	4.56959e-06	4.56867e-06
87501	4.57026e-06	4.56931e-06	4.57762e-06	4.56571e-06	4.56988e-06	4.56928e-06	4.56579e-06	4.56589e-06	4.57027e-06	4.56935e-06
87502	4.57094e-06	4.56998e-06	4.57829e-06	4.56639e-06	4.57056e-06	4.56996e-06	4.56647e-06	4.56657e-06	4.57094e-06	4.57003e-06
87503	4.57161e-06	4.57066e-06	4.57897e-06	4.56707e-06	4.57123e-06	4.57063e-06	4.56715e-06	4.56725e-06	4.57162e-06	4.5707e-06
87504	4.57229e-06	4.57134e-06	4.57965e-06	4.56774e-06	4.57191e-06	4.57131e-06	4.56782e-06	4.56792e-06	4.5723e-06	4.57138e-06
87505	4.57297e-06	4.57201e-06	4.58032e-06	4.56842e-06	4.57258e-06	4.57199e-06	4.5685e-06	4.5686e-06	4.57297e-06	4.57205e-06
87506	4.57364e-06	4.57269e-06	4.581e-06	4.5691e-06	4.57326e-06	4.57266e-06	4.56918e-06	4.56927e-06	4.57365e-06	4.57273e-06
87507	4.57432e-06	4.57337e-06	4.58168e-06	4.56977e-06	4.57394e-06	4.57334e-06	4.56985e-06	4.56995e-06	4.57433e-06	4.57341e-06
87508	4.575e-06	4.57404e-06	4.58235e-06	4.57045e-06	4.57461e-06	4.57402e-06	4.57053e-06	4.57063e-06	4.575e-06	4.57408e-06
87509	4.57567e-06	4.57472e-06	4.58303e-06	4.57112e-06	4.57529e-06	4.57469e-06	4.5712e-06	4.5713e-06	4.57568e-06	4.57476e-06
87510	4.57635e-06	4.5754e-06	4.58371e-06	4.5718e-06	4.57597e-06	4.57537e-06	4.57188e-06	4.57198e-06	4.57635e-06	4.57544e-06
87511	4.57703e-06	4.57607e-06	4.58439e-06	4.57248e-06	4.57664e-06	4.57605e-06	4.57256e-06	4.57266e-06	4.57703e-06	4.57611e-06
87512	4.5777e-06	4.57675e-06	4.58506e-06	4.57315e-06	4.57732e-06	4.57672e-06	4.57323e-06	4.57333e-06	4.57771e-06	4.57679e-06
87513	4.57838e-06	4.57743e-06	4.58574e-06	4.57383e-06	4.578e-06	4.5774e-06	4.57391e-06	4.57401e-06	4.57839e-06	4.57747e-06
87514	4.57906e-06	4.5781e-06	4.58642e-06	4.57451e-06	4.57867e-06	4.57808e-06	4.57459e-06	4.57469e-06	4.57906e-06	4.57814e-06
87515	4.57973e-06	4.57878e-06	4.58709e-06	4.57518e-06	4.57935e-06	4.57875e-06	4.57526e-06	4.57536e-06	4.57974e-06	4.57882e-06
87516	4.58041e-06	4.57946e-06	4.58777e-06	4.57586e-06	4.58003e-06	4.57943e-06	4.57594e-06	4.57604e-06	4.58042e-06	4.5795e-06
87517	4.58109e-06	4.58013e-06	4.58845e-06	4.57654e-06	4.5807e-06	4.58011e-06	4.57662e-06	4.57672e-06	4.58109e-06	4.58017e-06
87518	4.58176e-06	4.58081e-06	4.58913e-06	4.57721e-06	4.58138e-06	4.58078e-06	4.57729e-06	4.57739e-06	4.58177e-06	4.58085e-06
87519	4.58244e-06	4.58149e-06	4.5898e-06	4.57789e-06	4.58206e-06	4.58146e-06	4.57797e-06	4.57807e-06	4.58245e-06	4.58153e-06
87520	4.58312e-06	4.58216e-06	4.59048e-06	4.57857e-06	4.58274e-06	4.58214e-06	4.57865e-06	4.57875e-06	4.58312e-06	4.58221e-06
87521	4.58379e-06	4.58284e-06	4.59116e-06	4.57924e-06	4.58341e-06	4.58281e-06	4.57932e-06	4.57942e-06	4.5838e-06	4.58288e-06
87522	4.58447e-06	4.58352e-06	4.59184e-06	4.57992e-06	4.58409e-06	4.58349e-06	4.58e-06	4.5801e-06	4.58448e-06	4.58356e-06
87523	4.58515e-06	4.5842e-06	4.59251e-06	4.5806e-06	4.58477e-06	4.58417e-06	4.58068e-06	4.58078e-06	4.58515e-06	4.58424e-06
87524	4.58582e-06	4.58487e-06	4.59319e-06	4.58127e-06	4.58544e-06	4.58484e-06	4.58135e-06	4.58145e-06	4.58583e-06	4.58491e-06
87525	4.5865e-06	4.58555e-06	4.59387e-06	4.58195e-06	4.58612e-06	4.58552e-06	4.58203e-06	4.58213e-06	4.58651e-06	4.58559e-06
87526	4.58718e-06	4.58623e-06	4.59454e-06	4.58263e-06	4.5868e-06	4.5862e-06	4.58271e-06	4.58281e-06	4.58719e-06	4.58627e-06
87527	4.58786e-06	4.5869e-06	4.59522e-06	4.5833e-06	4.58748e-06	4.58688e-06	4.58338e-06	4.58348e-06	4.58786e-06	4.58694e-06
87528	4.58853e-06	4.58758e-06	4.5959e-06	4.58398e-06	4.58815e-06	4.58755e-06	4.58406e-06	4.58416e-06	4.58854e-06	4.58762e-06
87529	4.58921e-06	4.58826e-06	4.59658e-06	4.58466e-06	4.58883e-06	4.58823e-06	4.58474e-06	4.58484e-06	4.58922e-06	4.5883e-06
87530	4.58989e-06	4.58894e-06	4.59725e-06	4.58534e-06	4.58951e-06	4.58891e-06	4.58542e-06	4.58551e-06	4.58989e-06	4.58898e-06
87531	4.59057e-06	4.58961e-06	4.59793e-06	4.58601e-06	4.59018e-06	4.58958e-06	4.58609e-06	4.58619e-06	4.59057e-06	4.58965e-06
87532	4.59124e-06	4.59029e-06	4.59861e-06	4.58669e-06	4.59086e-06	4.59026e-06	4.58677e-06	4.58687e-06	4.59125e-06	4.59033e-06
87533	4.59192e-06	4.59097e-06	4.59929e-06	4.58737e-06	4.59154e-06	4.59094e-06	4.58745e-06	4.58755e-06	4.59193e-06	4.59101e-06
87534	4.5926e-06	4.59164e-06	4.59996e-06	4.58804e-06	4.59222e-06	4.59162e-06	4.58812e-06	4.58822e-06	4.5926e-06	4.59169e-06
87535	4.59327e-06	4.59232e-06	4.60064e-06	4.58872e-06	4.59289e-06	4.59229e-06	4.5888e-06	4.5889e-06	4.59328e-06	4.59236e-06
87536	4.59395e-06	4.593e-06	4.60132e-06	4.5894e-06	4.59357e-06	4.59297e-06	4.58948e-06	4.58958e-06	4.59396e-06	4.59304e-06
87537	4.59463e-06	4.59368e-06	4.602e-06	4.59008e-06	4.59425e-06	4.59365e-06	4.59016e-06	4.59025e-06	4.59464e-06	4.59372e-06
87538	4.59531e-06	4.59435e-06	4.60268e-06	4.59075e-06	4.59493e-06	4.59433e-06	4.59083e-06	4.59093e-06	4.59531e-06	4.59439e-06
87539	4.59598e-06	4.59503e-06	4.60335e-06	4.59143e-06	4.5956e-06	4.595e-06	4.59151e-06	4.59161e-06	4.59599e-06	4.59507e-06
87540	4.59666e-06	4.59571e-06	4.60403e-06	4.59211e-06	4.59628e-06	4.59568e-06	4.59219e-06	4.59229e-06	4.59667e-06	4.59575e-06
87541	4.59734e-06	4.59639e-06	4.60471e-06	4.59279e-06	4.59696e-06	4.59636e-06	4.59286e-06	4.59296e-06	4.59735e-06	4.59643e-06
87542	4.59802e-06	4.59706e-06	4.60539e-06	4.59346e-06	4.59764e-06	4.59704e-06	4.59354e-06	4.59364e-06	4.59802e-06	4.5971e-06
87543	4.59869e-06	4.59774e-06	4.60606e-06	4.59414e-06	4.59831e-06	4.59771e-06	4.59422e-06	4.59432e-06	4.5987e-06	4.59778e-06
87544	4.59937e-06	4.59842e-06	4.60674e-06	4.59482e-06	4.59899e-06	4.59839e-06	4.5949e-06	4.595e-06	4.59938e-06	4.59846e-06
87545	4.60005e-06	4.5991e-06	4.60742e-06	4.59549e-06	4.59967e-06	4.59907e-06	4.59557e-06	4.59567e-06	4.60006e-06	4.59914e-06
87546	4.60073e-06	4.59977e-06	4.6081e-06	4.59617e-06	4.60035e-06	4.59975e-06	4.59625e-06	4.59635e-06	4.60073e-06	4.59982e-06
87547	4.6014e-06	4.60045e-06	4.60877e-06	4.59685e-06	4.60102e-06	4.60042e-06	4.59693e-06	4.59703e-06	4.60141e-06	4.60049e-06
87548	4.60208e-06	4.60113e-06	4.60945e-06	4.59753e-06	4.6017e-06	4.6011e-06	4.59761e-06	4.59771e-06	4.60209e-06	4.60117e-06
87549	4.60276e-06	4.60181e-06	4.61013e-06	4.5982e-06	4.60238e-06	4.60178e-06	4.59828e-06	4.59838e-06	4.60277e-06	4.60185e-06
87550	4.60344e-06	4.60248e-06	4.61081e-06	4.59888e-06	4.60306e-06	4.60246e-06	4.59896e-06	4.59906e-06	4.60344e-06	4.60253e-06
87551	4.60412e-06	4.60316e-06	4.61149e-06	4.59956e-06	4.60373e-06	4.60313e-06	4.59964e-06	4.59974e-06	4.60412e-06	4.6032e-06
87552	4.60479e-06	4.60384e-06	4.61216e-06	4.60024e-06	4.60441e-06	4.60381e-06	4.60032e-06	4.60042e-06	4.6048e-06	4.60388e-06
87553	4.60547e-06	4.60452e-06	4.61284e-06	4.60092e-06	4.60509e-06	4.60449e-06	4.60099e-06	4.60109e-06	4.60548e-06	4.60456e-06
87554	4.60615e-06	4.6052e-06	4.61352e-06	4.60159e-06	4.60577e-06	4.60517e-06	4.60167e-06	4.60177e-06	4.60616e-06	4.60524e-06
87555	4.60683e-06	4.60587e-06	4.6142e-06	4.60227e-06	4.60644e-06	4.60584e-06	4.60235e-06	4.60245e-06	4.60683e-06	4.60591e-06
87556	4.6075e-06	4.60655e-06	4.61487e-06	4.60295e-06	4.60712e-06	4.60652e-06	4.60303e-06	4.60313e-06	4.60751e-06	4.60659e-06
87557	4.60818e-06	4.60723e-06	4.61555e-06	4.60363e-06	4.6078e-06	4.6072e-06	4.6037e-06	4.6038e-06	4.60819e-06	4.60727e-06
87558	4.60886e-06	4.60791e-06	4.61623e-06	4.6043e-06	4.60848e-06	4.60788e-06	4.60438e-06	4.60448e-06	4.60887e-06	4.60795e-06
87559	4.60954e-06	4.60858e-06	4.61691e-06	4.60498e-06	4.60916e-06	4.60856e-06	4.60506e-06	4.60516e-06	4.60954e-06	4.60862e-06
87560	4.61022e-06	4.60926e-06	4.61759e-06	4.60566e-06	4.60983e-06	4.60923e-06	4.60574e-06	4.60584e-06	4.61022e-06	4.6093e-06
87561	4.61089e-06	4.60994e-06	4.61826e-06	4.60634e-06	4.61051e-06	4.60991e-06	4.60641e-06	4.60651e-06	4.6109e-06	4.60998e-06
87562	4.61157e-06	4.61062e-06	4.61894e-06	4.60701e-06	4.61119e-06	4.61059e-06	4.60709e-06	4.60719e-06	4.61158e-06	4.61066e-06
87563	4.61225e-06	4.6113e-06	4.61962e-06	4.60769e-06	4.61187e-06	4.61127e-06	4.60777e-06	4.60787e-06	4.61226e-06	4.61134e-06
87564	4.61293e-06	4.61197e-06	4.6203e-06	4.60837e-06	4.61254e-06	4.61194e-06	4.60845e-06	4.60855e-06	4.61293e-06	4.61201e-06
87565	4.6136e-06	4.61265e-06	4.62098e-06	4.60905e-06	4.61322e-06	4.61262e-06	4.60913e-06	4.60923e-06	4.61361e-06	4.61269e-06
87566	4.61428e-06	4.61333e-06	4.62165e-06	4.60973e-06	4.6139e-06	4.6133e-06	4.6098e-06	4.6099e-06	4.61429e-06	4.61337e-06
87567	4.61496e-06	4.61401e-06	4.62233e-06	4.6104e-06	4.61458e-06	4.61398e-06	4.61048e-06	4.61058e-06	4.61497e-06	4.61405e-06
87568	4.61564e-06	4.61468e-06	4.62301e-06	4.61108e-06	4.61526e-06	4.61466e-06	4.61116e-06	4.61126e-06	4.61564e-06	4.61473e-06
87569	4.61632e-06	4.61536e-06	4.62369e-06	4.61176e-06	4.61593e-06	4.61533e-06	4.61184e-06	4.61194e-06	4.61632e-06	4.6154e-06
87570	4.61699e-06	4.61604e-06	4.62436e-06	4.61244e-06	4.61661e-06	4.61601e-06	4.61251e-06	4.61261e-06	4.617e-06	4.61608e-06
87571	4.61767e-06	4.61672e-06	4.62504e-06	4.61311e-06	4.61729e-06	4.61669e-06	4.61319e-06	4.61329e-06	4.61768e-06	4.61676e-06
87572	4.61835e-06	4.6174e-06	4.62572e-06	4.61379e-06	4.61797e-06	4.61737e-06	4.61387e-06	4.61397e-06	4.61836e-06	4.61744e-06
87573	4.61903e-06	4.61807e-06	4.6264e-06	4.61447e-06	4.61865e-06	4.61805e-06	4.61455e-06	4.61465e-06	4.61903e-06	4.61811e-06
87574	4.6197e-06	4.61875e-06	4.62708e-06	4.61515e-06	4.61932e-06	4.61872e-06	4.61522e-06	4.61533e-06	4.61971e-06	4.61879e-06
87575	4.62038e-06	4.61943e-06	4.62775e-06	4.61583e-06	4.62e-06	4.6194e-06	4.6159e-06	4.616e-06	4.62039e-06	4.61947e-06
87576	4.62106e-06	4.62011e-06	4.62843e-06	4.6165e-06	4.62068e-06	4.62008e-06	4.61658e-06	4.61668e-06	4.62107e-06	4.62015e-06
87577	4.62174e-06	4.62078e-06	4.62911e-06	4.61718e-06	4.62136e-06	4.62076e-06	4.61726e-06	4.61736e-06	4.62174e-06	4.62083e-06
87578	4.62242e-06	4.62146e-06	4.62979e-06	4.61786e-06	4.62203e-06	4.62143e-06	4.61794e-06	4.61804e-06	4.62242e-06	4.6215e-06
87579	4.62309e-06	4.62214e-06	4.63046e-06	4.61854e-06	4.62271e-06	4.62211e-06	4.61861e-06	4.61871e-06	4.6231e-06	4.62218e-06
87580	4.62377e-06	4.62282e-06	4.63114e-06	4.61921e-06	4.62339e-06	4.62279e-06	4.61929e-06	4.61939e-06	4.62378e-06	4.62286e-06
87581	4.62445e-06	4.6235e-06	4.63182e-06	4.61989e-06	4.62407e-06	4.62347e-06	4.61997e-06	4.62007e-06	4.62446e-06	4.62354e-06
87582	4.62513e-06	4.62417e-06	4.6325e-06	4.62057e-06	4.62475e-06	4.62415e-06	4.62065e-06	4.62075e-06	4.62513e-06	4.62421e-06
87583	4.62581e-06	4.62485e-06	4.63318e-06	4.62125e-06	4.62542e-06	4.62482e-06	4.62132e-06	4.62143e-06	4.62581e-06	4.62489e-06
87584	4.62648e-06	4.62553e-06	4.63385e-06	4.62193e-06	4.6261e-06	4.6255e-06	4.622e-06	4.6221e-06	4.62649e-06	4.62557e-06
87585	4.62716e-06	4.62621e-06	4.63453e-06	4.6226e-06	4.62678e-06	4.62618e-06	4.62268e-06	4.62278e-06	4.62717e-06	4.62625e-06
87586	4.62784e-06	4.62688e-06	4.63521e-06	4.62328e-06	4.62746e-06	4.62686e-06	4.62336e-06	4.62346e-06	4.62784e-06	4.62693e-06
87587	4.62852e-06	4.62756e-06	4.63589e-06	4.62396e-06	4.62813e-06	4.62753e-06	4.62404e-06	4.62414e-06	4.62852e-06	4.6276e-06
87588	4.62919e-06	4.62824e-06	4.63656e-06	4.62464e-06	4.62881e-06	4.62821e-06	4.62471e-06	4.62481e-06	4.6292e-06	4.62828e-06
87589	4.62987e-06	4.62892e-06	4.63724e-06	4.62531e-06	4.62949e-06	4.62889e-06	4.62539e-06	4.62549e-06	4.62988e-06	4.62896e-06
87590	4.63055e-06	4.6296e-06	4.63792e-06	4.62599e-06	4.63017e-06	4.62957e-06	4.62607e-06	4.62617e-06	4.63056e-06	4.62964e-06
87591	4.63123e-06	4.63027e-06	4.6386e-06	4.62667e-06	4.63085e-06	4.63025e-06	4.62675e-06	4.62685e-06	4.63123e-06	4.63031e-06
87592	4.6319e-06	4.63095e-06	4.63927e-06	4.62735e-06	4.63152e-06	4.63092e-06	4.62742e-06	4.62752e-06	4.63191e-06	4.63099e-06
87593	4.63258e-06	4.63163e-06	4.63995e-06	4.62803e-06	4.6322e-06	4.6316e-06	4.6281e-06	4.6282e-06	4.63259e-06	4.63167e-06
87594	4.63326e-06	4.63231e-06	4.64063e-06	4.6287e-06	4.63288e-06	4.63228e-06	4.62878e-06	4.62888e-06	4.63327e-06	4.63235e-06
87595	4.63394e-06	4.63298e-06	4.64131e-06	4.62938e-06	4.63356e-06	4.63296e-06	4.62946e-06	4.62956e-06	4.63394e-06	4.63303e-06
87596	4.63462e-06	4.63366e-06	4.64198e-06	4.63006e-06	4.63423e-06	4.63363e-06	4.63014e-06	4.63024e-06	4.63462e-06	4.6337e-06
87597	4.63529e-06	4.63434e-06	4.64266e-06	4.63074e-06	4.63491e-06	4.63431e-06	4.63081e-06	4.63091e-06	4.6353e-06	4.63438e-06
87598	4.63597e-06	4.63502e-06	4.64334e-06	4.63141e-06	4.63559e-06	4.63499e-06	4.63149e-06	4.63159e-06	4.63598e-06	4.63506e-06
87599	4.63665e-06	4.6357e-06	4.64402e-06	4.63209e-06	4.63627e-06	4.63567e-06	4.63217e-06	4.63227e-06	4.63665e-06	4.63574e-06
87600	4.63733e-06	4.63637e-06	4.64469e-06	4.63277e-06	4.63694e-06	4.63634e-06	4.63285e-06	4.63295e-06	4.63733e-06	4.63641e-06
87601	4.638e-06	4.63705e-06	4.64537e-06	4.63345e-06	4.63762e-06	4.63702e-06	4.63352e-06	4.63362e-06	4.63801e-06	4.63709e-06
87602	4.63868e-06	4.63773e-06	4.64605e-06	4.63413e-06	4.6383e-06	4.6377e-06	4.6342e-06	4.6343e-06	4.63869e-06	4.63777e-06
87603	4.63936e-06	4.63841e-06	4.64672e-06	4.6348e-06	4.63898e-06	4.63838e-06	4.63488e-06	4.63498e-06	4.63937e-06	4.63845e-06
87604	4.64004e-06	4.63908e-06	4.6474e-06	4.63548e-06	4.63965e-06	4.63905e-06	4.63556e-06	4.63566e-06	4.64004e-06	4.63912e-06
87605	4.64071e-06	4.63976e-06	4.64808e-06	4.63616e-06	4.64033e-06	4.63973e-06	4.63623e-06	4.63633e-06	4.64072e-06	4.6398e-06
87606	4.64139e-06	4.64044e-06	4.64876e-06	4.63684e-06	4.64101e-06	4.64041e-06	4.63691e-06	4.63701e-06	4.6414e-06	4.64048e-06
87607	4.64207e-06	4.64112e-06	4.64943e-06	4.63751e-06	4.64169e-06	4.64109e-06	4.63759e-06	4.63769e-06	4.64207e-06	4.64116e-06
87608	4.64275e-06	4.64179e-06	4.65011e-06	4.63819e-06	4.64236e-06	4.64176e-06	4.63827e-06	4.63837e-06	4.64275e-06	4.64183e-06
87609	4.64342e-06	4.64247e-06	4.65079e-06	4.63887e-06	4.64304e-06	4.64244e-06	4.63894e-06	4.63904e-06	4.64343e-06	4.64251e-06
87610	4.6441e-06	4.64315e-06	4.65146e-06	4.63955e-06	4.64372e-06	4.64312e-06	4.63962e-06	4.63972e-06	4.64411e-06	4.64319e-06
87611	4.64478e-06	4.64383e-06	4.65214e-06	4.64022e-06	4.6444e-06	4.6438e-06	4.6403e-06	4.6404e-06	4.64478e-06	4.64387e-06
87612	4.64546e-06	4.6445e-06	4.65282e-06	4.6409e-06	4.64507e-06	4.64447e-06	4.64098e-06	4.64108e-06	4.64546e-06	4.64454e-06
87613	4.64613e-06	4.64518e-06	4.6535e-06	4.64158e-06	4.64575e-06	4.64515e-06	4.64165e-06	4.64175e-06	4.64614e-06	4.64522e-06
87614	4.64681e-06	4.64586e-06	4.65417e-06	4.64226e-06	4.64643e-06	4.64583e-06	4.64233e-06	4.64243e-06	4.64682e-06	4.6459e-06
87615	4.64749e-06	4.64653e-06	4.65485e-06	4.64293e-06	4.64711e-06	4.64651e-06	4.64301e-06	4.64311e-06	4.64749e-06	4.64657e-06
87616	4.64816e-06	4.64721e-06	4.65553e-06	4.64361e-06	4.64778e-06	4.64718e-06	4.64369e-06	4.64379e-06	4.64817e-06	4.64725e-06
87617	4.64884e-06	4.64789e-06	4.6562e-06	4.64429e-06	4.64846e-06	4.64786e-06	4.64436e-06	4.64446e-06	4.64885e-06	4.64793e-06
87618	4.64952e-06	4.64857e-06	4.65688e-06	4.64497e-06	4.64914e-06	4.64854e-06	4.64504e-06	4.64514e-06	4.64952e-06	4.64861e-06
87619	4.6502e-06	4.64924e-06	4.65756e-06	4.64564e-06	4.64981e-06	4.64921e-06	4.64572e-06	4.64582e-06	4.6502e-06	4.64928e-06
87620	4.65087e-06	4.64992e-06	4.65823e-06	4.64632e-06	4.65049e-06	4.64989e-06	4.64639e-06	4.6465e-06	4.65088e-06	4.64996e-06
87621	4.65155e-06	4.6506e-06	4.65891e-06	4.647e-06	4.65117e-06	4.65057e-06	4.64707e-06	4.64717e-06	4.65156e-06	4.65064e-06
87622	4.65223e-06	4.65127e-06	4.65959e-06	4.64767e-06	4.65185e-06	4.65125e-06	4.64775e-06	4.64785e-06	4.65223e-06	4.65131e-06
87623	4.6529e-06	4.65195e-06	4.66026e-06	4.64835e-06	4.65252e-06	4.65192e-06	4.64843e-06	4.64853e-06	4.65291e-06	4.65199e-06
87624	4.65358e-06	4.65263e-06	4.66094e-06	4.64903e-06	4.6532e-06	4.6526e-06	4.6491e-06	4.6492e-06	4.65359e-06	4.65267e-06
87625	4.65426e-06	4.6533e-06	4.66161e-06	4.64971e-06	4.65388e-06	4.65328e-06	4.64978e-06	4.64988e-06	4.65426e-06	4.65335e-06
87626	4.65493e-06	4.65398e-06	4.66229e-06	4.65038e-06	4.65455e-06	4.65395e-06	4.65046e-06	4.65056e-06	4.65494e-06	4.65402e-06
87627	4.65561e-06	4.65466e-06	4.66297e-06	4.65106e-06	4.65523e-06	4.65463e-06	4.65113e-06	4.65123e-06	4.65562e-06	4.6547e-06
87628	4.65629e-06	4.65534e-06	4.66364e-06	4.65174e-06	4.65591e-06	4.65531e-06	4.65181e-06	4.65191e-06	4.65629e-06	4.65538e-06
87629	4.65696e-06	4.65601e-06	4.66432e-06	4.65241e-06	4.65658e-06	4.65598e-06	4.65249e-06	4.65259e-06	4.65697e-06	4.65605e-06
87630	4.65764e-06	4.65669e-06	4.665e-06	4.65309e-06	4.65726e-06	4.65666e-06	4.65316e-06	4.65327e-06	4.65765e-06	4.65673e-06
87631	4.65832e-06	4.65737e-06	4.66567e-06	4.65377e-06	4.65794e-06	4.65734e-06	4.65384e-06	4.65394e-06	4.65832e-06	4.65741e-06
87632	4.65899e-06	4.65804e-06	4.66635e-06	4.65444e-06	4.65861e-06	4.65801e-06	4.65452e-06	4.65462e-06	4.659e-06	4.65808e-06
87633	4.65967e-06	4.65872e-06	4.66702e-06	4.65512e-06	4.65929e-06	4.65869e-06	4.65519e-06	4.6553e-06	4.65968e-06	4.65876e-06
87634	4.66035e-06	4.65939e-06	4.6677e-06	4.6558e-06	4.65997e-06	4.65937e-06	4.65587e-06	4.65597e-06	4.66035e-06	4.65944e-06
87635	4.66102e-06	4.66007e-06	4.66837e-06	4.65647e-06	4.66064e-06	4.66004e-06	4.65655e-06	4.65665e-06	4.66103e-06	4.66011e-06
87636	4.6617e-06	4.66075e-06	4.66905e-06	4.65715e-06	4.66132e-06	4.66072e-06	4.65722e-06	4.65733e-06	4.66171e-06	4.66079e-06
87637	4.66238e-06	4.66142e-06	4.66973e-06	4.65783e-06	4.66199e-06	4.6614e-06	4.6579e-06	4.658e-06	4.66238e-06	4.66146e-06
87638	4.66305e-06	4.6621e-06	4.6704e-06	4.6585e-06	4.66267e-06	4.66207e-06	4.65858e-06	4.65868e-06	4.66306e-06	4.66214e-06
87639	4.66373e-06	4.66278e-06	4.67108e-06	4.65918e-06	4.66335e-06	4.66275e-06	4.65925e-06	4.65935e-06	4.66373e-06	4.66282e-06
87640	4.6644e-06	4.66345e-06	4.67175e-06	4.65986e-06	4.66402e-06	4.66342e-06	4.65993e-06	4.66003e-06	4.66441e-06	4.66349e-06
87641	4.66508e-06	4.66413e-06	4.67243e-06	4.66053e-06	4.6647e-06	4.6641e-06	4.66061e-06	4.66071e-06	4.66509e-06	4.66417e-06
87642	4.66576e-06	4.6648e-06	4.6731e-06	4.66121e-06	4.66538e-06	4.66478e-06	4.66128e-06	4.66138e-06	4.66576e-06	4.66485e-06
87643	4.66643e-06	4.66548e-06	4.67378e-06	4.66189e-06	4.66605e-06	4.66545e-06	4.66196e-06	4.66206e-06	4.66644e-06	4.66552e-06
87644	4.66711e-06	4.66616e-06	4.67445e-06	4.66256e-06	4.66673e-06	4.66613e-06	4.66264e-06	4.66274e-06	4.66711e-06	4.6662e-06
87645	4.66778e-06	4.66683e-06	4.67513e-06	4.66324e-06	4.6674e-06	4.6668e-06	4.66331e-06	4.66341e-06	4.66779e-06	4.66687e-06
87646	4.66846e-06	4.66751e-06	4.6758e-06	4.66391e-06	4.66808e-06	4.66748e-06	4.66399e-06	4.66409e-06	4.66847e-06	4.66755e-06
87647	4.66914e-06	4.66818e-06	4.67648e-06	4.66459e-06	4.66875e-06	4.66816e-06	4.66466e-06	4.66476e-06	4.66914e-06	4.66822e-06
87648	4.66981e-06	4.66886e-06	4.67715e-06	4.66527e-06	4.66943e-06	4.66883e-06	4.66534e-06	4.66544e-06	4.66982e-06	4.6689e-06
87649	4.67049e-06	4.66954e-06	4.67783e-06	4.66594e-06	4.67011e-06	4.66951e-06	4.66602e-06	4.66612e-06	4.67049e-06	4.66958e-06
87650	4.67116e-06	4.67021e-06	4.6785e-06	4.66662e-06	4.67078e-06	4.67018e-06	4.66669e-06	4.66679e-06	4.67117e-06	4.67025e-06
87651	4.67184e-06	4.67089e-06	4.67918e-06	4.66729e-06	4.67146e-06	4.67086e-06	4.66737e-06	4.66747e-06	4.67184e-06	4.67093e-06
87652	4.67251e-06	4.67156e-06	4.67985e-06	4.66797e-06	4.67213e-06	4.67153e-06	4.66804e-06	4.66814e-06	4.67252e-06	4.6716e-06
87653	4.67319e-06	4.67224e-06	4.68053e-06	4.66865e-06	4.67281e-06	4.67221e-06	4.66872e-06	4.66882e-06	4.67319e-06	4.67228e-06
87654	4.67386e-06	4.67291e-06	4.6812e-06	4.66932e-06	4.67348e-06	4.67289e-06	4.6694e-06	4.66949e-06	4.67387e-06	4.67295e-06
87655	4.67454e-06	4.67359e-06	4.68188e-06	4.67e-06	4.67416e-06	4.67356e-06	4.67007e-06	4.67017e-06	4.67454e-06	4.67363e-06
87656	4.67521e-06	4.67426e-06	4.68255e-06	4.67067e-06	4.67483e-06	4.67424e-06	4.67075e-06	4.67085e-06	4.67522e-06	4.6743e-06
87657	4.67589e-06	4.67494e-06	4.68322e-06	4.67135e-06	4.67551e-06	4.67491e-06	4.67142e-06	4.67152e-06	4.67589e-06	4.67498e-06
87658	4.67656e-06	4.67561e-06	4.6839e-06	4.67202e-06	4.67618e-06	4.67559e-06	4.6721e-06	4.6722e-06	4.67657e-06	4.67565e-06
87659	4.67724e-06	4.67629e-06	4.68457e-06	4.6727e-06	4.67686e-06	4.67626e-06	4.67277e-06	4.67287e-06	4.67724e-06	4.67633e-06
87660	4.67791e-06	4.67696e-06	4.68525e-06	4.67337e-06	4.67753e-06	4.67694e-06	4.67345e-06	4.67355e-06	4.67792e-06	4.677e-06
87661	4.67859e-06	4.67764e-06	4.68592e-06	4.67405e-06	4.67821e-06	4.67761e-06	4.67412e-06	4.67422e-06	4.67859e-06	4.67768e-06
87662	4.67926e-06	4.67831e-06	4.68659e-06	4.67472e-06	4.67888e-06	4.67829e-06	4.6748e-06	4.6749e-06	4.67927e-06	4.67835e-06
87663	4.67994e-06	4.67899e-06	4.68727e-06	4.6754e-06	4.67956e-06	4.67896e-06	4.67547e-06	4.67557e-06	4.67994e-06	4.67903e-06
87664	4.68061e-06	4.67966e-06	4.68794e-06	4.67607e-06	4.68023e-06	4.67963e-06	4.67615e-06	4.67625e-06	4.68062e-06	4.6797e-06
87665	4.68129e-06	4.68034e-06	4.68861e-06	4.67675e-06	4.68091e-06	4.68031e-06	4.67682e-06	4.67692e-06	4.68129e-06	4.68038e-06
87666	4.68196e-06	4.68101e-06	4.68929e-06	4.67742e-06	4.68158e-06	4.68098e-06	4.6775e-06	4.6776e-06	4.68197e-06	4.68105e-06
87667	4.68263e-06	4.68169e-06	4.68996e-06	4.6781e-06	4.68225e-06	4.68166e-06	4.67817e-06	4.67827e-06	4.68264e-06	4.68173e-06
87668	4.68331e-06	4.68236e-06	4.69063e-06	4.67877e-06	4.68293e-06	4.68233e-06	4.67885e-06	4.67895e-06	4.68331e-06	4.6824e-06
87669	4.68398e-06	4.68303e-06	4.69131e-06	4.67945e-06	4.6836e-06	4.68301e-06	4.67952e-06	4.67962e-06	4.68399e-06	4.68307e-06
87670	4.68466e-06	4.68371e-06	4.69198e-06	4.68012e-06	4.68428e-06	4.68368e-06	4.6802e-06	4.68029e-06	4.68466e-06	4.68375e-06
87671	4.68533e-06	4.68438e-06	4.69265e-06	4.6808e-06	4.68495e-06	4.68435e-06	4.68087e-06	4.68097e-06	4.68534e-06	4.68442e-06
87672	4.686e-06	4.68506e-06	4.69332e-06	4.68147e-06	4.68562e-06	4.68503e-06	4.68154e-06	4.68164e-06	4.68601e-06	4.6851e-06
87673	4.68668e-06	4.68573e-06	4.694e-06	4.68215e-06	4.6863e-06	4.6857e-06	4.68222e-06	4.68232e-06	4.68668e-06	4.68577e-06
87674	4.68735e-06	4.6864e-06	4.69467e-06	4.68282e-06	4.68697e-06	4.68638e-06	4.68289e-06	4.68299e-06	4.68736e-06	4.68644e-06
87675	4.68802e-06	4.68708e-06	4.69534e-06	4.68349e-06	4.68765e-06	4.68705e-06	4.68357e-06	4.68367e-06	4.68803e-06	4.68712e-06
87676	4.6887e-06	4.68775e-06	4.69601e-06	4.68417e-06	4.68832e-06	4.68772e-06	4.68424e-06	4.68434e-06	4.6887e-06	4.68779e-06
87677	4.68937e-06	4.68842e-06	4.69669e-06	4.68484e-06	4.68899e-06	4.6884e-06	4.68491e-06	4.68501e-06	4.68938e-06	4.68846e-06
87678	4.69004e-06	4.6891e-06	4.69736e-06	4.68552e-06	4.68967e-06	4.68907e-06	4.68559e-06	4.68569e-06	4.69005e-06	4.68914e-06
87679	4.69072e-06	4.68977e-06	4.69803e-06	4.68619e-06	4.69034e-06	4.68974e-06	4.68626e-06	4.68636e-06	4.69072e-06	4.68981e-06
87680	4.69139e-06	4.69044e-06	4.6987e-06	4.68686e-06	4.69101e-06	4.69042e-06	4.68694e-06	4.68703e-06	4.6914e-06	4.69048e-06
87681	4.69206e-06	4.69112e-06	4.69937e-06	4.68754e-06	4.69168e-06	4.69109e-06	4.68761e-06	4.68771e-06	4.69207e-06	4.69116e-06
87682	4.69274e-06	4.69179e-06	4.70005e-06	4.68821e-06	4.69236e-06	4.69176e-06	4.68828e-06	4.68838e-06	4.69274e-06	4.69183e-06
87683	4.69341e-06	4.69246e-06	4.70072e-06	4.68888e-06	4.69303e-06	4.69244e-06	4.68896e-06	4.68905e-06	4.69342e-06	4.6925e-06
87684	4.69408e-06	4.69314e-06	4.70139e-06	4.68956e-06	4.6937e-06	4.69311e-06	4.68963e-06	4.68973e-06	4.69409e-06	4.69318e-06
87685	4.69475e-06	4.69381e-06	4.70206e-06	4.69023e-06	4.69438e-06	4.69378e-06	4.6903e-06	4.6904e-06	4.69476e-06	4.69385e-06
87686	4.69543e-06	4.69448e-06	4.70273e-06	4.6909e-06	4.69505e-06	4.69445e-06	4.69098e-06	4.69107e-06	4.69543e-06	4.69452e-06
87687	4.6961e-06	4.69515e-06	4.7034e-06	4.69158e-06	4.69572e-06	4.69513e-06	4.69165e-06	4.69175e-06	4.69611e-06	4.69519e-06
87688	4.69677e-06	4.69583e-06	4.70407e-06	4.69225e-06	4.69639e-06	4.6958e-06	4.69232e-06	4.69242e-06	4.69678e-06	4.69587e-06
87689	4.69744e-06	4.6965e-06	4.70474e-06	4.69292e-06	4.69706e-06	4.69647e-06	4.69299e-06	4.69309e-06	4.69745e-06	4.69654e-06
87690	4.69812e-06	4.69717e-06	4.70541e-06	4.69359e-06	4.69774e-06	4.69714e-06	4.69367e-06	4.69377e-06	4.69812e-06	4.69721e-06
87691	4.69879e-06	4.69784e-06	4.70608e-06	4.69427e-06	4.69841e-06	4.69781e-06	4.69434e-06	4.69444e-06	4.69879e-06	4.69788e-06
87692	4.69946e-06	4.69851e-06	4.70676e-06	4.69494e-06	4.69908e-06	4.69849e-06	4.69501e-06	4.69511e-06	4.69946e-06	4.69855e-06
87693	4.70013e-06	4.69919e-06	4.70743e-06	4.69561e-06	4.69975e-06	4.69916e-06	4.69568e-06	4.69578e-06	4.70014e-06	4.69923e-06
87694	4.7008e-06	4.69986e-06	4.7081e-06	4.69628e-06	4.70042e-06	4.69983e-06	4.69636e-06	4.69645e-06	4.70081e-06	4.6999e-06
87695	4.70147e-06	4.70053e-06	4.70877e-06	4.69696e-06	4.7011e-06	4.7005e-06	4.69703e-06	4.69713e-06	4.70148e-06	4.70057e-06
87696	4.70214e-06	4.7012e-06	4.70944e-06	4.69763e-06	4.70177e-06	4.70117e-06	4.6977e-06	4.6978e-06	4.70215e-06	4.70124e-06
87697	4.70282e-06	4.70187e-06	4.7101e-06	4.6983e-06	4.70244e-06	4.70184e-06	4.69837e-06	4.69847e-06	4.70282e-06	4.70191e-06
87698	4.70349e-06	4.70254e-06	4.71077e-06	4.69897e-06	4.70311e-06	4.70251e-06	4.69904e-06	4.69914e-06	4.70349e-06	4.70258e-06
87699	4.70416e-06	4.70321e-06	4.71144e-06	4.69964e-06	4.70378e-06	4.70319e-06	4.69972e-06	4.69981e-06	4.70416e-06	4.70325e-06
87700	4.70483e-06	4.70388e-06	4.71211e-06	4.70032e-06	4.70445e-06	4.70386e-06	4.70039e-06	4.70049e-06	4.70483e-06	4.70392e-06
87701	4.7055e-06	4.70456e-06	4.71278e-06	4.70099e-06	4.70512e-06	4.70453e-06	4.70106e-06	4.70116e-06	4.7055e-06	4.7046e-06
87702	4.70617e-06	4.70523e-06	4.71345e-06	4.70166e-06	4.70579e-06	4.7052e-06	4.70173e-06	4.70183e-06	4.70618e-06	4.70527e-06
87703	4.70684e-06	4.7059e-06	4.71412e-06	4.70233e-06	4.70646e-06	4.70587e-06	4.7024e-06	4.7025e-06	4.70685e-06	4.70594e-06
87704	4.70751e-06	4.70657e-06	4.71479e-06	4.703e-06	4.70713e-06	4.70654e-06	4.70307e-06	4.70317e-06	4.70752e-06	4.70661e-06
87705	4.70818e-06	4.70724e-06	4.71546e-06	4.70367e-06	4.7078e-06	4.70721e-06	4.70374e-06	4.70384e-06	4.70819e-06	4.70728e-06
87706	4.70885e-06	4.70791e-06	4.71613e-06	4.70434e-06	4.70847e-06	4.70788e-06	4.70441e-06	4.70451e-06	4.70886e-06	4.70795e-06
87707	4.70952e-06	4.70858e-06	4.71679e-06	4.70501e-06	4.70914e-06	4.70855e-06	4.70508e-06	4.70518e-06	4.70953e-06	4.70862e-06
87708	4.71019e-06	4.70925e-06	4.71746e-06	4.70568e-06	4.70981e-06	4.70922e-06	4.70575e-06	4.70585e-06	4.7102e-06	4.70929e-06
87709	4.71086e-06	4.70992e-06	4.71813e-06	4.70635e-06	4.71048e-06	4.70989e-06	4.70642e-06	4.70652e-06	4.71086e-06	4.70996e-06
87710	4.71153e-06	4.71059e-06	4.7188e-06	4.70702e-06	4.71115e-06	4.71056e-06	4.7071e-06	4.70719e-06	4.71153e-06	4.71063e-06
87711	4.7122e-06	4.71126e-06	4.71947e-06	4.70769e-06	4.71182e-06	4.71123e-06	4.70777e-06	4.70786e-06	4.7122e-06	4.7113e-06
87712	4.71287e-06	4.71193e-06	4.72013e-06	4.70836e-06	4.71249e-06	4.7119e-06	4.70844e-06	4.70853e-06	4.71287e-06	4.71197e-06
87713	4.71354e-06	4.71259e-06	4.7208e-06	4.70903e-06	4.71316e-06	4.71257e-06	4.70911e-06	4.7092e-06	4.71354e-06	4.71263e-06
87714	4.7142e-06	4.71326e-06	4.72147e-06	4.7097e-06	4.71383e-06	4.71324e-06	4.70978e-06	4.70987e-06	4.71421e-06	4.7133e-06
87715	4.71487e-06	4.71393e-06	4.72213e-06	4.71037e-06	4.7145e-06	4.7139e-06	4.71044e-06	4.71054e-06	4.71488e-06	4.71397e-06
87716	4.71554e-06	4.7146e-06	4.7228e-06	4.71104e-06	4.71517e-06	4.71457e-06	4.71111e-06	4.71121e-06	4.71555e-06	4.71464e-06
87717	4.71621e-06	4.71527e-06	4.72347e-06	4.71171e-06	4.71583e-06	4.71524e-06	4.71178e-06	4.71188e-06	4.71622e-06	4.71531e-06
87718	4.71688e-06	4.71594e-06	4.72413e-06	4.71238e-06	4.7165e-06	4.71591e-06	4.71245e-06	4.71255e-06	4.71688e-06	4.71598e-06
87719	4.71755e-06	4.71661e-06	4.7248e-06	4.71305e-06	4.71717e-06	4.71658e-06	4.71312e-06	4.71322e-06	4.71755e-06	4.71665e-06
87720	4.71821e-06	4.71727e-06	4.72547e-06	4.71372e-06	4.71784e-06	4.71725e-06	4.71379e-06	4.71389e-06	4.71822e-06	4.71731e-06
87721	4.71888e-06	4.71794e-06	4.72613e-06	4.71439e-06	4.71851e-06	4.71791e-06	4.71446e-06	4.71456e-06	4.71889e-06	4.71798e-06
87722	4.71955e-06	4.71861e-06	4.7268e-06	4.71506e-06	4.71917e-06	4.71858e-06	4.71513e-06	4.71523e-06	4.71956e-06	4.71865e-06
87723	4.72022e-06	4.71928e-06	4.72746e-06	4.71573e-06	4.71984e-06	4.71925e-06	4.7158e-06	4.71589e-06	4.72022e-06	4.71932e-06
87724	4.72088e-06	4.71995e-06	4.72813e-06	4.71639e-06	4.72051e-06	4.71992e-06	4.71646e-06	4.71656e-06	4.72089e-06	4.71999e-06
87725	4.72155e-06	4.72061e-06	4.72879e-06	4.71706e-06	4.72118e-06	4.72058e-06	4.71713e-06	4.71723e-06	4.72156e-06	4.72065e-06
87726	4.72222e-06	4.72128e-06	4.72946e-06	4.71773e-06	4.72184e-06	4.72125e-06	4.7178e-06	4.7179e-06	4.72222e-06	4.72132e-06
87727	4.72289e-06	4.72195e-06	4.73012e-06	4.7184e-06	4.72251e-06	4.72192e-06	4.71847e-06	4.71857e-06	4.72289e-06	4.72199e-06
87728	4.72355e-06	4.72261e-06	4.73079e-06	4.71907e-06	4.72318e-06	4.72259e-06	4.71914e-06	4.71923e-06	4.72356e-06	4.72265e-06
87729	4.72422e-06	4.72328e-06	4.73145e-06	4.71973e-06	4.72384e-06	4.72325e-06	4.7198e-06	4.7199e-06	4.72422e-06	4.72332e-06
87730	4.72488e-06	4.72395e-06	4.73212e-06	4.7204e-06	4.72451e-06	4.72392e-06	4.72047e-06	4.72057e-06	4.72489e-06	4.72399e-06
87731	4.72555e-06	4.72461e-06	4.73278e-06	4.72107e-06	4.72518e-06	4.72459e-06	4.72114e-06	4.72124e-06	4.72556e-06	4.72465e-06
87732	4.72622e-06	4.72528e-06	4.73345e-06	4.72173e-06	4.72584e-06	4.72525e-06	4.7218e-06	4.7219e-06	4.72622e-06	4.72532e-06
87733	4.72688e-06	4.72595e-06	4.73411e-06	4.7224e-06	4.72651e-06	4.72592e-06	4.72247e-06	4.72257e-06	4.72689e-06	4.72599e-06
87734	4.72755e-06	4.72661e-06	4.73477e-06	4.72307e-06	4.72717e-06	4.72658e-06	4.72314e-06	4.72324e-06	4.72755e-06	4.72665e-06
87735	4.72821e-06	4.72728e-06	4.73544e-06	4.72374e-06	4.72784e-06	4.72725e-06	4.7238e-06	4.7239e-06	4.72822e-06	4.72732e-06
87736	4.72888e-06	4.72794e-06	4.7361e-06	4.7244e-06	4.7285e-06	4.72791e-06	4.72447e-06	4.72457e-06	4.72888e-06	4.72798e-06
87737	4.72954e-06	4.72861e-06	4.73676e-06	4.72507e-06	4.72917e-06	4.72858e-06	4.72514e-06	4.72524e-06	4.72955e-06	4.72865e-06
87738	4.73021e-06	4.72927e-06	4.73743e-06	4.72573e-06	4.72983e-06	4.72924e-06	4.7258e-06	4.7259e-06	4.73021e-06	4.72931e-06
87739	4.73087e-06	4.72994e-06	4.73809e-06	4.7264e-06	4.7305e-06	4.72991e-06	4.72647e-06	4.72657e-06	4.73088e-06	4.72998e-06
87740	4.73154e-06	4.7306e-06	4.73875e-06	4.72707e-06	4.73116e-06	4.73057e-06	4.72713e-06	4.72723e-06	4.73154e-06	4.73064e-06
87741	4.7322e-06	4.73127e-06	4.73941e-06	4.72773e-06	4.73183e-06	4.73124e-06	4.7278e-06	4.7279e-06	4.73221e-06	4.73131e-06
87742	4.73287e-06	4.73193e-06	4.74007e-06	4.7284e-06	4.73249e-06	4.7319e-06	4.72847e-06	4.72856e-06	4.73287e-06	4.73197e-06
87743	4.73353e-06	4.7326e-06	4.74074e-06	4.72906e-06	4.73316e-06	4.73257e-06	4.72913e-06	4.72923e-06	4.73354e-06	4.73264e-06
87744	4.73419e-06	4.73326e-06	4.7414e-06	4.72973e-06	4.73382e-06	4.73323e-06	4.7298e-06	4.72989e-06	4.7342e-06	4.7333e-06
87745	4.73486e-06	4.73392e-06	4.74206e-06	4.73039e-06	4.73448e-06	4.7339e-06	4.73046e-06	4.73056e-06	4.73486e-06	4.73396e-06
87746	4.73552e-06	4.73459e-06	4.74272e-06	4.73106e-06	4.73515e-06	4.73456e-06	4.73112e-06	4.73122e-06	4.73553e-06	4.73463e-06
87747	4.73618e-06	4.73525e-06	4.74338e-06	4.73172e-06	4.73581e-06	4.73522e-06	4.73179e-06	4.73189e-06	4.73619e-06	4.73529e-06
87748	4.73685e-06	4.73591e-06	4.74404e-06	4.73238e-06	4.73647e-06	4.73589e-06	4.73245e-06	4.73255e-06	4.73685e-06	4.73595e-06
87749	4.73751e-06	4.73658e-06	4.7447e-06	4.73305e-06	4.73714e-06	4.73655e-06	4.73312e-06	4.73322e-06	4.73751e-06	4.73662e-06
87750	4.73817e-06	4.73724e-06	4.74536e-06	4.73371e-06	4.7378e-06	4.73721e-06	4.73378e-06	4.73388e-06	4.73818e-06	4.73728e-06
87751	4.73883e-06	4.7379e-06	4.74602e-06	4.73438e-06	4.73846e-06	4.73787e-06	4.73444e-06	4.73454e-06	4.73884e-06	4.73794e-06
87752	4.7395e-06	4.73857e-06	4.74668e-06	4.73504e-06	4.73912e-06	4.73854e-06	4.73511e-06	4.73521e-06	4.7395e-06	4.7386e-06
87753	4.74016e-06	4.73923e-06	4.74734e-06	4.7357e-06	4.73979e-06	4.7392e-06	4.73577e-06	4.73587e-06	4.74016e-06	4.73927e-06
87754	4.74082e-06	4.73989e-06	4.748e-06	4.73637e-06	4.74045e-06	4.73986e-06	4.73643e-06	4.73653e-06	4.74083e-06	4.73993e-06
87755	4.74148e-06	4.74055e-06	4.74866e-06	4.73703e-06	4.74111e-06	4.74052e-06	4.7371e-06	4.7372e-06	4.74149e-06	4.74059e-06
87756	4.74214e-06	4.74121e-06	4.74932e-06	4.73769e-06	4.74177e-06	4.74118e-06	4.73776e-06	4.73786e-06	4.74215e-06	4.74125e-06
87757	4.7428e-06	4.74187e-06	4.74998e-06	4.73835e-06	4.74243e-06	4.74185e-06	4.73842e-06	4.73852e-06	4.74281e-06	4.74191e-06
87758	4.74346e-06	4.74254e-06	4.75064e-06	4.73902e-06	4.74309e-06	4.74251e-06	4.73908e-06	4.73918e-06	4.74347e-06	4.74257e-06
87759	4.74413e-06	4.7432e-06	4.75129e-06	4.73968e-06	4.74375e-06	4.74317e-06	4.73975e-06	4.73984e-06	4.74413e-06	4.74324e-06
87760	4.74479e-06	4.74386e-06	4.75195e-06	4.74034e-06	4.74441e-06	4.74383e-06	4.74041e-06	4.74051e-06	4.74479e-06	4.7439e-06
87761	4.74545e-06	4.74452e-06	4.75261e-06	4.741e-06	4.74507e-06	4.74449e-06	4.74107e-06	4.74117e-06	4.74545e-06	4.74456e-06
87762	4.74611e-06	4.74518e-06	4.75327e-06	4.74166e-06	4.74573e-06	4.74515e-06	4.74173e-06	4.74183e-06	4.74611e-06	4.74522e-06
87763	4.74677e-06	4.74584e-06	4.75392e-06	4.74232e-06	4.74639e-06	4.74581e-06	4.74239e-06	4.74249e-06	4.74677e-06	4.74588e-06
87764	4.74742e-06	4.7465e-06	4.75458e-06	4.74299e-06	4.74705e-06	4.74647e-06	4.74305e-06	4.74315e-06	4.74743e-06	4.74654e-06
87765	4.74808e-06	4.74716e-06	4.75524e-06	4.74365e-06	4.74771e-06	4.74713e-06	4.74371e-06	4.74381e-06	4.74809e-06	4.7472e-06
87766	4.74874e-06	4.74782e-06	4.75589e-06	4.74431e-06	4.74837e-06	4.74779e-06	4.74437e-06	4.74447e-06	4.74875e-06	4.74786e-06
87767	4.7494e-06	4.74848e-06	4.75655e-06	4.74497e-06	4.74903e-06	4.74845e-06	4.74504e-06	4.74513e-06	4.74941e-06	4.74851e-06
87768	4.75006e-06	4.74913e-06	4.75721e-06	4.74563e-06	4.74969e-06	4.74911e-06	4.7457e-06	4.74579e-06	4.75007e-06	4.74917e-06
87769	4.75072e-06	4.74979e-06	4.75786e-06	4.74629e-06	4.75035e-06	4.74976e-06	4.74635e-06	4.74645e-06	4.75072e-06	4.74983e-06
87770	4.75138e-06	4.75045e-06	4.75852e-06	4.74695e-06	4.75101e-06	4.75042e-06	4.74701e-06	4.74711e-06	4.75138e-06	4.75049e-06
87771	4.75203e-06	4.75111e-06	4.75917e-06	4.74761e-06	4.75166e-06	4.75108e-06	4.74767e-06	4.74777e-06	4.75204e-06	4.75115e-06
87772	4.75269e-06	4.75177e-06	4.75983e-06	4.74826e-06	4.75232e-06	4.75174e-06	4.74833e-06	4.74843e-06	4.7527e-06	4.75181e-06
87773	4.75335e-06	4.75243e-06	4.76048e-06	4.74892e-06	4.75298e-06	4.7524e-06	4.74899e-06	4.74909e-06	4.75336e-06	4.75246e-06
87774	4.75401e-06	4.75308e-06	4.76114e-06	4.74958e-06	4.75364e-06	4.75305e-06	4.74965e-06	4.74975e-06	4.75401e-06	4.75312e-06
87775	4.75466e-06	4.75374e-06	4.76179e-06	4.75024e-06	4.75429e-06	4.75371e-06	4.75031e-06	4.75041e-06	4.75467e-06	4.75378e-06
87776	4.75532e-06	4.7544e-06	4.76244e-06	4.7509e-06	4.75495e-06	4.75437e-06	4.75097e-06	4.75106e-06	4.75533e-06	4.75444e-06
87777	4.75598e-06	4.75505e-06	4.7631e-06	4.75156e-06	4.75561e-06	4.75502e-06	4.75163e-06	4.75172e-06	4.75598e-06	4.75509e-06
87778	4.75663e-06	4.75571e-06	4.76375e-06	4.75221e-06	4.75626e-06	4.75568e-06	4.75228e-06	4.75238e-06	4.75664e-06	4.75575e-06
87779	4.75729e-06	4.75637e-06	4.7644e-06	4.75287e-06	4.75692e-06	4.75634e-06	4.75294e-06	4.75304e-06	4.75729e-06	4.7564e-06
87780	4.75794e-06	4.75702e-06	4.76506e-06	4.75353e-06	4.75757e-06	4.75699e-06	4.7536e-06	4.7537e-06	4.75795e-06	4.75706e-06
87781	4.7586e-06	4.75768e-06	4.76571e-06	4.75419e-06	4.75823e-06	4.75765e-06	4.75425e-06	4.75435e-06	4.7586e-06	4.75772e-06
87782	4.75925e-06	4.75833e-06	4.76636e-06	4.75484e-06	4.75889e-06	4.7583e-06	4.75491e-06	4.75501e-06	4.75926e-06	4.75837e-06
87783	4.75991e-06	4.75899e-06	4.76701e-06	4.7555e-06	4.75954e-06	4.75896e-06	4.75557e-06	4.75567e-06	4.75991e-06	4.75903e-06
87784	4.76056e-06	4.75964e-06	4.76766e-06	4.75616e-06	4.76019e-06	4.75961e-06	4.75622e-06	4.75632e-06	4.76057e-06	4.75968e-06
87785	4.76122e-06	4.7603e-06	4.76831e-06	4.75681e-06	4.76085e-06	4.76027e-06	4.75688e-06	4.75698e-06	4.76122e-06	4.76034e-06
87786	4.76187e-06	4.76095e-06	4.76897e-06	4.75747e-06	4.7615e-06	4.76092e-06	4.75754e-06	4.75763e-06	4.76188e-06	4.76099e-06
87787	4.76253e-06	4.76161e-06	4.76962e-06	4.75812e-06	4.76216e-06	4.76158e-06	4.75819e-06	4.75829e-06	4.76253e-06	4.76165e-06
87788	4.76318e-06	4.76226e-06	4.77027e-06	4.75878e-06	4.76281e-06	4.76223e-06	4.75885e-06	4.75894e-06	4.76318e-06	4.7623e-06
87789	4.76383e-06	4.76291e-06	4.77092e-06	4.75943e-06	4.76346e-06	4.76288e-06	4.7595e-06	4.7596e-06	4.76384e-06	4.76295e-06
87790	4.76448e-06	4.76357e-06	4.77157e-06	4.76009e-06	4.76412e-06	4.76354e-06	4.76016e-06	4.76025e-06	4.76449e-06	4.76361e-06
87791	4.76514e-06	4.76422e-06	4.77222e-06	4.76074e-06	4.76477e-06	4.76419e-06	4.76081e-06	4.76091e-06	4.76514e-06	4.76426e-06
87792	4.76579e-06	4.76487e-06	4.77287e-06	4.7614e-06	4.76542e-06	4.76484e-06	4.76146e-06	4.76156e-06	4.7658e-06	4.76491e-06
87793	4.76644e-06	4.76552e-06	4.77351e-06	4.76205e-06	4.76607e-06	4.7655e-06	4.76212e-06	4.76222e-06	4.76645e-06	4.76556e-06
87794	4.76709e-06	4.76618e-06	4.77416e-06	4.7627e-06	4.76673e-06	4.76615e-06	4.76277e-06	4.76287e-06	4.7671e-06	4.76622e-06
87795	4.76774e-06	4.76683e-06	4.77481e-06	4.76336e-06	4.76738e-06	4.7668e-06	4.76343e-06	4.76352e-06	4.76775e-06	4.76687e-06
87796	4.7684e-06	4.76748e-06	4.77546e-06	4.76401e-06	4.76803e-06	4.76745e-06	4.76408e-06	4.76418e-06	4.7684e-06	4.76752e-06
87797	4.76905e-06	4.76813e-06	4.77611e-06	4.76466e-06	4.76868e-06	4.7681e-06	4.76473e-06	4.76483e-06	4.76905e-06	4.76817e-06
87798	4.7697e-06	4.76878e-06	4.77675e-06	4.76532e-06	4.76933e-06	4.76875e-06	4.76538e-06	4.76548e-06	4.7697e-06	4.76882e-06
87799	4.77035e-06	4.76943e-06	4.7774e-06	4.76597e-06	4.76998e-06	4.7694e-06	4.76604e-06	4.76613e-06	4.77035e-06	4.76947e-06
87800	4.771e-06	4.77008e-06	4.77805e-06	4.76662e-06	4.77063e-06	4.77005e-06	4.76669e-06	4.76678e-06	4.771e-06	4.77012e-06
87801	4.77165e-06	4.77073e-06	4.77869e-06	4.76727e-06	4.77128e-06	4.7707e-06	4.76734e-06	4.76744e-06	4.77165e-06	4.77077e-06
87802	4.7723e-06	4.77138e-06	4.77934e-06	4.76792e-06	4.77193e-06	4.77135e-06	4.76799e-06	4.76809e-06	4.7723e-06	4.77142e-06
87803	4.77295e-06	4.77203e-06	4.77999e-06	4.76857e-06	4.77258e-06	4.772e-06	4.76864e-06	4.76874e-06	4.77295e-06	4.77207e-06
87804	4.77359e-06	4.77268e-06	4.78063e-06	4.76923e-06	4.77323e-06	4.77265e-06	4.76929e-06	4.76939e-06	4.7736e-06	4.77272e-06
87805	4.77424e-06	4.77333e-06	4.78128e-06	4.76988e-06	4.77388e-06	4.7733e-06	4.76994e-06	4.77004e-06	4.77425e-06	4.77337e-06
87806	4.77489e-06	4.77398e-06	4.78192e-06	4.77053e-06	4.77453e-06	4.77395e-06	4.77059e-06	4.77069e-06	4.7749e-06	4.77402e-06
87807	4.77554e-06	4.77463e-06	4.78256e-06	4.77118e-06	4.77517e-06	4.7746e-06	4.77124e-06	4.77134e-06	4.77555e-06	4.77467e-06
87808	4.77619e-06	4.77528e-06	4.78321e-06	4.77183e-06	4.77582e-06	4.77525e-06	4.77189e-06	4.77199e-06	4.77619e-06	4.77531e-06
87809	4.77683e-06	4.77592e-06	4.78385e-06	4.77248e-06	4.77647e-06	4.77589e-06	4.77254e-06	4.77264e-06	4.77684e-06	4.77596e-06
87810	4.77748e-06	4.77657e-06	4.7845e-06	4.77312e-06	4.77712e-06	4.77654e-06	4.77319e-06	4.77329e-06	4.77749e-06	4.77661e-06
87811	4.77813e-06	4.77722e-06	4.78514e-06	4.77377e-06	4.77776e-06	4.77719e-06	4.77384e-06	4.77394e-06	4.77813e-06	4.77726e-06
87812	4.77877e-06	4.77787e-06	4.78578e-06	4.77442e-06	4.77841e-06	4.77784e-06	4.77449e-06	4.77458e-06	4.77878e-06	4.7779e-06
87813	4.77942e-06	4.77851e-06	4.78642e-06	4.77507e-06	4.77906e-06	4.77848e-06	4.77514e-06	4.77523e-06	4.77943e-06	4.77855e-06
87814	4.78007e-06	4.77916e-06	4.78707e-06	4.77572e-06	4.7797e-06	4.77913e-06	4.77578e-06	4.77588e-06	4.78007e-06	4.7792e-06
87815	4.78071e-06	4.7798e-06	4.78771e-06	4.77636e-06	4.78035e-06	4.77977e-06	4.77643e-06	4.77653e-06	4.78072e-06	4.77984e-06
87816	4.78136e-06	4.78045e-06	4.78835e-06	4.77701e-06	4.78099e-06	4.78042e-06	4.77708e-06	4.77717e-06	4.78136e-06	4.78049e-06
87817	4.782e-06	4.78109e-06	4.78899e-06	4.77766e-06	4.78164e-06	4.78106e-06	4.77772e-06	4.77782e-06	4.78201e-06	4.78113e-06
87818	4.78264e-06	4.78174e-06	4.78963e-06	4.77831e-06	4.78228e-06	4.78171e-06	4.77837e-06	4.77847e-06	4.78265e-06	4.78178e-06
87819	4.78329e-06	4.78238e-06	4.79027e-06	4.77895e-06	4.78293e-06	4.78235e-06	4.77902e-06	4.77911e-06	4.78329e-06	4.78242e-06
87820	4.78393e-06	4.78303e-06	4.79091e-06	4.7796e-06	4.78357e-06	4.783e-06	4.77966e-06	4.77976e-06	4.78394e-06	4.78307e-06
87821	4.78458e-06	4.78367e-06	4.79155e-06	4.78024e-06	4.78421e-06	4.78364e-06	4.78031e-06	4.78041e-06	4.78458e-06	4.78371e-06
87822	4.78522e-06	4.78431e-06	4.79219e-06	4.78089e-06	4.78486e-06	4.78429e-06	4.78095e-06	4.78105e-06	4.78522e-06	4.78435e-06
87823	4.78586e-06	4.78496e-06	4.79283e-06	4.78153e-06	4.7855e-06	4.78493e-06	4.7816e-06	4.7817e-06	4.78587e-06	4.785e-06
87824	4.7865e-06	4.7856e-06	4.79347e-06	4.78218e-06	4.78614e-06	4.78557e-06	4.78224e-06	4.78234e-06	4.78651e-06	4.78564e-06
87825	4.78714e-06	4.78624e-06	4.7941e-06	4.78282e-06	4.78678e-06	4.78621e-06	4.78289e-06	4.78298e-06	4.78715e-06	4.78628e-06
87826	4.78779e-06	4.78688e-06	4.79474e-06	4.78347e-06	4.78743e-06	4.78686e-06	4.78353e-06	4.78363e-06	4.78779e-06	4.78692e-06
87827	4.78843e-06	4.78753e-06	4.79538e-06	4.78411e-06	4.78807e-06	4.7875e-06	4.78417e-06	4.78427e-06	4.78843e-06	4.78756e-06
87828	4.78907e-06	4.78817e-06	4.79602e-06	4.78475e-06	4.78871e-06	4.78814e-06	4.78482e-06	4.78491e-06	4.78907e-06	4.78821e-06
87829	4.78971e-06	4.78881e-06	4.79665e-06	4.78539e-06	4.78935e-06	4.78878e-06	4.78546e-06	4.78556e-06	4.78971e-06	4.78885e-06
87830	4.79035e-06	4.78945e-06	4.79729e-06	4.78604e-06	4.78999e-06	4.78942e-06	4.7861e-06	4.7862e-06	4.79035e-06	4.78949e-06
87831	4.79099e-06	4.79009e-06	4.79792e-06	4.78668e-06	4.79063e-06	4.79006e-06	4.78675e-06	4.78684e-06	4.79099e-06	4.79013e-06
87832	4.79163e-06	4.79073e-06	4.79856e-06	4.78732e-06	4.79127e-06	4.7907e-06	4.78739e-06	4.78748e-06	4.79163e-06	4.79077e-06
87833	4.79227e-06	4.79137e-06	4.79919e-06	4.78796e-06	4.79191e-06	4.79134e-06	4.78803e-06	4.78812e-06	4.79227e-06	4.79141e-06
87834	4.79291e-06	4.79201e-06	4.79983e-06	4.7886e-06	4.79255e-06	4.79198e-06	4.78867e-06	4.78877e-06	4.79291e-06	4.79205e-06
87835	4.79354e-06	4.79265e-06	4.80046e-06	4.78924e-06	4.79318e-06	4.79262e-06	4.78931e-06	4.78941e-06	4.79355e-06	4.79268e-06
87836	4.79418e-06	4.79329e-06	4.8011e-06	4.78988e-06	4.79382e-06	4.79326e-06	4.78995e-06	4.79005e-06	4.79419e-06	4.79332e-06
87837	4.79482e-06	4.79392e-06	4.80173e-06	4.79052e-06	4.79446e-06	4.79389e-06	4.79059e-06	4.79069e-06	4.79483e-06	4.79396e-06
87838	4.79546e-06	4.79456e-06	4.80236e-06	4.79116e-06	4.7951e-06	4.79453e-06	4.79123e-06	4.79133e-06	4.79546e-06	4.7946e-06
87839	4.79609e-06	4.7952e-06	4.80299e-06	4.7918e-06	4.79574e-06	4.79517e-06	4.79187e-06	4.79197e-06	4.7961e-06	4.79524e-06
87840	4.79673e-06	4.79584e-06	4.80363e-06	4.79244e-06	4.79637e-06	4.79581e-06	4.79251e-06	4.7926e-06	4.79674e-06	4.79587e-06
87841	4.79737e-06	4.79647e-06	4.80426e-06	4.79308e-06	4.79701e-06	4.79644e-06	4.79315e-06	4.79324e-06	4.79737e-06	4.79651e-06
87842	4.798e-06	4.79711e-06	4.80489e-06	4.79372e-06	4.79764e-06	4.79708e-06	4.79378e-06	4.79388e-06	4.79801e-06	4.79715e-06
87843	4.79864e-06	4.79774e-06	4.80552e-06	4.79436e-06	4.79828e-06	4.79771e-06	4.79442e-06	4.79452e-06	4.79864e-06	4.79778e-06
87844	4.79927e-06	4.79838e-06	4.80615e-06	4.79499e-06	4.79891e-06	4.79835e-06	4.79506e-06	4.79516e-06	4.79928e-06	4.79842e-06
87845	4.79991e-06	4.79901e-06	4.80678e-06	4.79563e-06	4.79955e-06	4.79898e-06	4.7957e-06	4.79579e-06	4.79991e-06	4.79905e-06
87846	4.80054e-06	4.79965e-06	4.80741e-06	4.79627e-06	4.80018e-06	4.79962e-06	4.79633e-06	4.79643e-06	4.80055e-06	4.79969e-06
87847	4.80117e-06	4.80028e-06	4.80804e-06	4.7969e-06	4.80082e-06	4.80025e-06	4.79697e-06	4.79707e-06	4.80118e-06	4.80032e-06
87848	4.80181e-06	4.80092e-06	4.80867e-06	4.79754e-06	4.80145e-06	4.80089e-06	4.79761e-06	4.7977e-06	4.80181e-06	4.80095e-06
87849	4.80244e-06	4.80155e-06	4.8093e-06	4.79818e-06	4.80208e-06	4.80152e-06	4.79824e-06	4.79834e-06	4.80245e-06	4.80159e-06
87850	4.80307e-06	4.80218e-06	4.80993e-06	4.79881e-06	4.80272e-06	4.80215e-06	4.79888e-06	4.79897e-06	4.80308e-06	4.80222e-06
87851	4.8037e-06	4.80282e-06	4.81055e-06	4.79945e-06	4.80335e-06	4.80279e-06	4.79951e-06	4.79961e-06	4.80371e-06	4.80285e-06
87852	4.80434e-06	4.80345e-06	4.81118e-06	4.80008e-06	4.80398e-06	4.80342e-06	4.80015e-06	4.80024e-06	4.80434e-06	4.80349e-06
87853	4.80497e-06	4.80408e-06	4.81181e-06	4.80071e-06	4.80461e-06	4.80405e-06	4.80078e-06	4.80087e-06	4.80497e-06	4.80412e-06
87854	4.8056e-06	4.80471e-06	4.81243e-06	4.80135e-06	4.80524e-06	4.80468e-06	4.80141e-06	4.80151e-06	4.8056e-06	4.80475e-06
87855	4.80623e-06	4.80534e-06	4.81306e-06	4.80198e-06	4.80587e-06	4.80531e-06	4.80205e-06	4.80214e-06	4.80623e-06	4.80538e-06
87856	4.80686e-06	4.80597e-06	4.81368e-06	4.80261e-06	4.8065e-06	4.80594e-06	4.80268e-06	4.80277e-06	4.80686e-06	4.80601e-06
87857	4.80749e-06	4.8066e-06	4.81431e-06	4.80325e-06	4.80713e-06	4.80657e-06	4.80331e-06	4.80341e-06	4.80749e-06	4.80664e-06
87858	4.80812e-06	4.80723e-06	4.81493e-06	4.80388e-06	4.80776e-06	4.8072e-06	4.80394e-06	4.80404e-06	4.80812e-06	4.80727e-06
87859	4.80875e-06	4.80786e-06	4.81556e-06	4.80451e-06	4.80839e-06	4.80783e-06	4.80457e-06	4.80467e-06	4.80875e-06	4.8079e-06
87860	4.80937e-06	4.80849e-06	4.81618e-06	4.80514e-06	4.80902e-06	4.80846e-06	4.80521e-06	4.8053e-06	4.80938e-06	4.80853e-06
87861	4.81e-06	4.80912e-06	4.8168e-06	4.80577e-06	4.80965e-06	4.80909e-06	4.80584e-06	4.80593e-06	4.81001e-06	4.80916e-06
87862	4.81063e-06	4.80975e-06	4.81743e-06	4.8064e-06	4.81028e-06	4.80972e-06	4.80647e-06	4.80656e-06	4.81063e-06	4.80978e-06
87863	4.81126e-06	4.81037e-06	4.81805e-06	4.80703e-06	4.8109e-06	4.81035e-06	4.8071e-06	4.80719e-06	4.81126e-06	4.81041e-06
87864	4.81188e-06	4.811e-06	4.81867e-06	4.80766e-06	4.81153e-06	4.81097e-06	4.80773e-06	4.80782e-06	4.81189e-06	4.81104e-06
87865	4.81251e-06	4.81163e-06	4.81929e-06	4.80829e-06	4.81216e-06	4.8116e-06	4.80836e-06	4.80845e-06	4.81251e-06	4.81167e-06
87866	4.81313e-06	4.81226e-06	4.81991e-06	4.80892e-06	4.81278e-06	4.81223e-06	4.80898e-06	4.80908e-06	4.81314e-06	4.81229e-06
87867	4.81376e-06	4.81288e-06	4.82053e-06	4.80955e-06	4.81341e-06	4.81285e-06	4.80961e-06	4.80971e-06	4.81377e-06	4.81292e-06
87868	4.81438e-06	4.81351e-06	4.82115e-06	4.81017e-06	4.81403e-06	4.81348e-06	4.81024e-06	4.81033e-06	4.81439e-06	4.81354e-06
87869	4.81501e-06	4.81413e-06	4.82177e-06	4.8108e-06	4.81466e-06	4.8141e-06	4.81087e-06	4.81096e-06	4.81501e-06	4.81417e-06
87870	4.81563e-06	4.81476e-06	4.82239e-06	4.81143e-06	4.81528e-06	4.81473e-06	4.81149e-06	4.81159e-06	4.81564e-06	4.81479e-06
87871	4.81626e-06	4.81538e-06	4.82301e-06	4.81205e-06	4.81591e-06	4.81535e-06	4.81212e-06	4.81221e-06	4.81626e-06	4.81542e-06
87872	4.81688e-06	4.816e-06	4.82363e-06	4.81268e-06	4.81653e-06	4.81597e-06	4.81275e-06	4.81284e-06	4.81688e-06	4.81604e-06
87873	4.8175e-06	4.81663e-06	4.82424e-06	4.81331e-06	4.81715e-06	4.8166e-06	4.81337e-06	4.81346e-06	4.81751e-06	4.81666e-06
87874	4.81812e-06	4.81725e-06	4.82486e-06	4.81393e-06	4.81777e-06	4.81722e-06	4.814e-06	4.81409e-06	4.81813e-06	4.81729e-06
87875	4.81874e-06	4.81787e-06	4.82548e-06	4.81456e-06	4.8184e-06	4.81784e-06	4.81462e-06	4.81471e-06	4.81875e-06	4.81791e-06
87876	4.81937e-06	4.81849e-06	4.82609e-06	4.81518e-06	4.81902e-06	4.81846e-06	4.81525e-06	4.81534e-06	4.81937e-06	4.81853e-06
87877	4.81999e-06	4.81911e-06	4.82671e-06	4.8158e-06	4.81964e-06	4.81909e-06	4.81587e-06	4.81596e-06	4.81999e-06	4.81915e-06
87878	4.82061e-06	4.81974e-06	4.82732e-06	4.81643e-06	4.82026e-06	4.81971e-06	4.81649e-06	4.81659e-06	4.82061e-06	4.81977e-06
87879	4.82123e-06	4.82036e-06	4.82794e-06	4.81705e-06	4.82088e-06	4.82033e-06	4.81712e-06	4.81721e-06	4.82123e-06	4.82039e-06
87880	4.82185e-06	4.82098e-06	4.82855e-06	4.81767e-06	4.8215e-06	4.82095e-06	4.81774e-06	4.81783e-06	4.82185e-06	4.82101e-06
87881	4.82246e-06	4.8216e-06	4.82917e-06	4.81829e-06	4.82212e-06	4.82157e-06	4.81836e-06	4.81845e-06	4.82247e-06	4.82163e-06
87882	4.82308e-06	4.82221e-06	4.82978e-06	4.81892e-06	4.82274e-06	4.82218e-06	4.81898e-06	4.81907e-06	4.82309e-06	4.82225e-06
87883	4.8237e-06	4.82283e-06	4.83039e-06	4.81954e-06	4.82335e-06	4.8228e-06	4.8196e-06	4.81969e-06	4.82371e-06	4.82287e-06
87884	4.82432e-06	4.82345e-06	4.831e-06	4.82016e-06	4.82397e-06	4.82342e-06	4.82022e-06	4.82032e-06	4.82432e-06	4.82349e-06
87885	4.82494e-06	4.82407e-06	4.83162e-06	4.82078e-06	4.82459e-06	4.82404e-06	4.82084e-06	4.82094e-06	4.82494e-06	4.82411e-06
87886	4.82555e-06	4.82469e-06	4.83223e-06	4.8214e-06	4.82521e-06	4.82466e-06	4.82146e-06	4.82155e-06	4.82556e-06	4.82472e-06
87887	4.82617e-06	4.8253e-06	4.83284e-06	4.82202e-06	4.82582e-06	4.82527e-06	4.82208e-06	4.82217e-06	4.82617e-06	4.82534e-06
87888	4.82678e-06	4.82592e-06	4.83345e-06	4.82264e-06	4.82644e-06	4.82589e-06	4.8227e-06	4.82279e-06	4.82679e-06	4.82596e-06
87889	4.8274e-06	4.82653e-06	4.83406e-06	4.82325e-06	4.82705e-06	4.8265e-06	4.82332e-06	4.82341e-06	4.8274e-06	4.82657e-06
87890	4.82801e-06	4.82715e-06	4.83467e-06	4.82387e-06	4.82767e-06	4.82712e-06	4.82394e-06	4.82403e-06	4.82802e-06	4.82719e-06
87891	4.82863e-06	4.82776e-06	4.83528e-06	4.82449e-06	4.82828e-06	4.82773e-06	4.82455e-06	4.82465e-06	4.82863e-06	4.8278e-06
87892	4.82924e-06	4.82838e-06	4.83588e-06	4.82511e-06	4.8289e-06	4.82835e-06	4.82517e-06	4.82526e-06	4.82925e-06	4.82842e-06
87893	4.82985e-06	4.82899e-06	4.83649e-06	4.82572e-06	4.82951e-06	4.82896e-06	4.82579e-06	4.82588e-06	4.82986e-06	4.82903e-06
87894	4.83047e-06	4.8296e-06	4.8371e-06	4.82634e-06	4.83012e-06	4.82958e-06	4.8264e-06	4.82649e-06	4.83047e-06	4.82964e-06
87895	4.83108e-06	4.83022e-06	4.8377e-06	4.82695e-06	4.83073e-06	4.83019e-06	4.82702e-06	4.82711e-06	4.83108e-06	4.83025e-06
87896	4.83169e-06	4.83083e-06	4.83831e-06	4.82757e-06	4.83135e-06	4.8308e-06	4.82763e-06	4.82772e-06	4.83169e-06	4.83087e-06
87897	4.8323e-06	4.83144e-06	4.83892e-06	4.82818e-06	4.83196e-06	4.83141e-06	4.82825e-06	4.82834e-06	4.83231e-06	4.83148e-06
87898	4.83291e-06	4.83205e-06	4.83952e-06	4.8288e-06	4.83257e-06	4.83202e-06	4.82886e-06	4.82895e-06	4.83292e-06	4.83209e-06
87899	4.83352e-06	4.83266e-06	4.84012e-06	4.82941e-06	4.83318e-06	4.83263e-06	4.82947e-06	4.82956e-06	4.83353e-06	4.8327e-06
87900	4.83413e-06	4.83327e-06	4.84073e-06	4.83002e-06	4.83379e-06	4.83324e-06	4.83009e-06	4.83018e-06	4.83414e-06	4.83331e-06
87901	4.83474e-06	4.83388e-06	4.84133e-06	4.83063e-06	4.8344e-06	4.83385e-06	4.8307e-06	4.83079e-06	4.83474e-06	4.83392e-06
87902	4.83535e-06	4.83449e-06	4.84193e-06	4.83125e-06	4.83501e-06	4.83446e-06	4.83131e-06	4.8314e-06	4.83535e-06	4.83453e-06
87903	4.83595e-06	4.8351e-06	4.84254e-06	4.83186e-06	4.83561e-06	4.83507e-06	4.83192e-06	4.83201e-06	4.83596e-06	4.83514e-06
87904	4.83656e-06	4.83571e-06	4.84314e-06	4.83247e-06	4.83622e-06	4.83568e-06	4.83253e-06	4.83262e-06	4.83657e-06	4.83575e-06
87905	4.83717e-06	4.83632e-06	4.84374e-06	4.83308e-06	4.83683e-06	4.83629e-06	4.83314e-06	4.83323e-06	4.83717e-06	4.83635e-06
87906	4.83777e-06	4.83692e-06	4.84434e-06	4.83369e-06	4.83744e-06	4.83689e-06	4.83375e-06	4.83384e-06	4.83778e-06	4.83696e-06
87907	4.83838e-06	4.83753e-06	4.84494e-06	4.8343e-06	4.83804e-06	4.8375e-06	4.83436e-06	4.83445e-06	4.83839e-06	4.83757e-06
87908	4.83899e-06	4.83814e-06	4.84554e-06	4.83491e-06	4.83865e-06	4.83811e-06	4.83497e-06	4.83506e-06	4.83899e-06	4.83817e-06
87909	4.83959e-06	4.83874e-06	4.84614e-06	4.83551e-06	4.83925e-06	4.83871e-06	4.83558e-06	4.83567e-06	4.8396e-06	4.83878e-06
87910	4.84019e-06	4.83935e-06	4.84674e-06	4.83612e-06	4.83986e-06	4.83932e-06	4.83619e-06	4.83628e-06	4.8402e-06	4.83938e-06
87911	4.8408e-06	4.83995e-06	4.84733e-06	4.83673e-06	4.84046e-06	4.83992e-06	4.8368e-06	4.83688e-06	4.8408e-06	4.83999e-06
87912	4.8414e-06	4.84055e-06	4.84793e-06	4.83734e-06	4.84106e-06	4.84053e-06	4.8374e-06	4.83749e-06	4.84141e-06	4.84059e-06
87913	4.842e-06	4.84116e-06	4.84853e-06	4.83794e-06	4.84167e-06	4.84113e-06	4.83801e-06	4.8381e-06	4.84201e-06	4.84119e-06
87914	4.84261e-06	4.84176e-06	4.84912e-06	4.83855e-06	4.84227e-06	4.84173e-06	4.83861e-06	4.8387e-06	4.84261e-06	4.8418e-06
87915	4.84321e-06	4.84236e-06	4.84972e-06	4.83915e-06	4.84287e-06	4.84233e-06	4.83922e-06	4.83931e-06	4.84321e-06	4.8424e-06
87916	4.84381e-06	4.84296e-06	4.85031e-06	4.83976e-06	4.84347e-06	4.84294e-06	4.83982e-06	4.83991e-06	4.84381e-06	4.843e-06
87917	4.84441e-06	4.84357e-06	4.85091e-06	4.84036e-06	4.84407e-06	4.84354e-06	4.84043e-06	4.84052e-06	4.84441e-06	4.8436e-06
87918	4.84501e-06	4.84417e-06	4.8515e-06	4.84097e-06	4.84467e-06	4.84414e-06	4.84103e-06	4.84112e-06	4.84501e-06	4.8442e-06
87919	4.84561e-06	4.84477e-06	4.85209e-06	4.84157e-06	4.84527e-06	4.84474e-06	4.84163e-06	4.84172e-06	4.84561e-06	4.8448e-06
87920	4.84621e-06	4.84537e-06	4.85269e-06	4.84217e-06	4.84587e-06	4.84534e-06	4.84224e-06	4.84232e-06	4.84621e-06	4.8454e-06
87921	4.8468e-06	4.84596e-06	4.85328e-06	4.84277e-06	4.84647e-06	4.84594e-06	4.84284e-06	4.84293e-06	4.84681e-06	4.846e-06
87922	4.8474e-06	4.84656e-06	4.85387e-06	4.84337e-06	4.84707e-06	4.84653e-06	4.84344e-06	4.84353e-06	4.84741e-06	4.8466e-06
87923	4.848e-06	4.84716e-06	4.85446e-06	4.84397e-06	4.84766e-06	4.84713e-06	4.84404e-06	4.84413e-06	4.848e-06	4.8472e-06
87924	4.8486e-06	4.84776e-06	4.85505e-06	4.84457e-06	4.84826e-06	4.84773e-06	4.84464e-06	4.84473e-06	4.8486e-06	4.84779e-06
87925	4.84919e-06	4.84835e-06	4.85564e-06	4.84517e-06	4.84886e-06	4.84833e-06	4.84524e-06	4.84533e-06	4.8492e-06	4.84839e-06
87926	4.84979e-06	4.84895e-06	4.85623e-06	4.84577e-06	4.84945e-06	4.84892e-06	4.84584e-06	4.84593e-06	4.84979e-06	4.84899e-06
87927	4.85038e-06	4.84955e-06	4.85682e-06	4.84637e-06	4.85005e-06	4.84952e-06	4.84644e-06	4.84652e-06	4.85039e-06	4.84958e-06
87928	4.85098e-06	4.85014e-06	4.8574e-06	4.84697e-06	4.85064e-06	4.85011e-06	4.84704e-06	4.84712e-06	4.85098e-06	4.85018e-06
87929	4.85157e-06	4.85074e-06	4.85799e-06	4.84757e-06	4.85124e-06	4.85071e-06	4.84763e-06	4.84772e-06	4.85157e-06	4.85077e-06
87930	4.85216e-06	4.85133e-06	4.85858e-06	4.84816e-06	4.85183e-06	4.8513e-06	4.84823e-06	4.84832e-06	4.85217e-06	4.85137e-06
87931	4.85275e-06	4.85192e-06	4.85916e-06	4.84876e-06	4.85242e-06	4.85189e-06	4.84883e-06	4.84891e-06	4.85276e-06	4.85196e-06
87932	4.85335e-06	4.85251e-06	4.85975e-06	4.84936e-06	4.85301e-06	4.85249e-06	4.84942e-06	4.84951e-06	4.85335e-06	4.85255e-06
87933	4.85394e-06	4.85311e-06	4.86034e-06	4.84995e-06	4.85361e-06	4.85308e-06	4.85002e-06	4.8501e-06	4.85394e-06	4.85314e-06
87934	4.85453e-06	4.8537e-06	4.86092e-06	4.85055e-06	4.8542e-06	4.85367e-06	4.85061e-06	4.8507e-06	4.85453e-06	4.85373e-06
87935	4.85512e-06	4.85429e-06	4.8615e-06	4.85114e-06	4.85479e-06	4.85426e-06	4.8512e-06	4.85129e-06	4.85512e-06	4.85433e-06
87936	4.85571e-06	4.85488e-06	4.86209e-06	4.85173e-06	4.85538e-06	4.85485e-06	4.8518e-06	4.85189e-06	4.85571e-06	4.85492e-06
87937	4.8563e-06	4.85547e-06	4.86267e-06	4.85233e-06	4.85597e-06	4.85544e-06	4.85239e-06	4.85248e-06	4.8563e-06	4.85551e-06
87938	4.85688e-06	4.85606e-06	4.86325e-06	4.85292e-06	4.85656e-06	4.85603e-06	4.85298e-06	4.85307e-06	4.85689e-06	4.85609e-06
87939	4.85747e-06	4.85665e-06	4.86383e-06	4.85351e-06	4.85714e-06	4.85662e-06	4.85358e-06	4.85366e-06	4.85748e-06	4.85668e-06
87940	4.85806e-06	4.85723e-06	4.86441e-06	4.8541e-06	4.85773e-06	4.85721e-06	4.85417e-06	4.85425e-06	4.85807e-06	4.85727e-06
87941	4.85865e-06	4.85782e-06	4.86499e-06	4.85469e-06	4.85832e-06	4.85779e-06	4.85476e-06	4.85484e-06	4.85865e-06	4.85786e-06
87942	4.85923e-06	4.85841e-06	4.86557e-06	4.85528e-06	4.8589e-06	4.85838e-06	4.85535e-06	4.85543e-06	4.85924e-06	4.85845e-06
87943	4.85982e-06	4.85899e-06	4.86615e-06	4.85587e-06	4.85949e-06	4.85897e-06	4.85594e-06	4.85602e-06	4.85982e-06	4.85903e-06
87944	4.8604e-06	4.85958e-06	4.86673e-06	4.85646e-06	4.86007e-06	4.85955e-06	4.85652e-06	4.85661e-06	4.86041e-06	4.85962e-06
87945	4.86099e-06	4.86017e-06	4.8673e-06	4.85705e-06	4.86066e-06	4.86014e-06	4.85711e-06	4.8572e-06	4.86099e-06	4.8602e-06
87946	4.86157e-06	4.86075e-06	4.86788e-06	4.85764e-06	4.86124e-06	4.86072e-06	4.8577e-06	4.85779e-06	4.86157e-06	4.86079e-06
87947	4.86215e-06	4.86133e-06	4.86846e-06	4.85822e-06	4.86183e-06	4.86131e-06	4.85829e-06	4.85837e-06	4.86216e-06	4.86137e-06
87948	4.86274e-06	4.86192e-06	4.86903e-06	4.85881e-06	4.86241e-06	4.86189e-06	4.85887e-06	4.85896e-06	4.86274e-06	4.86195e-06
87949	4.86332e-06	4.8625e-06	4.86961e-06	4.85939e-06	4.86299e-06	4.86247e-06	4.85946e-06	4.85954e-06	4.86332e-06	4.86254e-06
87950	4.8639e-06	4.86308e-06	4.87018e-06	4.85998e-06	4.86357e-06	4.86305e-06	4.86004e-06	4.86013e-06	4.8639e-06	4.86312e-06
87951	4.86448e-06	4.86366e-06	4.87076e-06	4.86056e-06	4.86415e-06	4.86363e-06	4.86063e-06	4.86071e-06	4.86448e-06	4.8637e-06
87952	4.86506e-06	4.86424e-06	4.87133e-06	4.86115e-06	4.86473e-06	4.86422e-06	4.86121e-06	4.8613e-06	4.86506e-06	4.86428e-06
87953	4.86564e-06	4.86482e-06	4.8719e-06	4.86173e-06	4.86531e-06	4.8648e-06	4.8618e-06	4.86188e-06	4.86564e-06	4.86486e-06
87954	4.86622e-06	4.8654e-06	4.87247e-06	4.86231e-06	4.86589e-06	4.86537e-06	4.86238e-06	4.86246e-06	4.86622e-06	4.86544e-06
87955	4.86679e-06	4.86598e-06	4.87304e-06	4.8629e-06	4.86647e-06	4.86595e-06	4.86296e-06	4.86305e-06	4.8668e-06	4.86602e-06
87956	4.86737e-06	4.86656e-06	4.87361e-06	4.86348e-06	4.86705e-06	4.86653e-06	4.86354e-06	4.86363e-06	4.86738e-06	4.8666e-06
87957	4.86795e-06	4.86714e-06	4.87418e-06	4.86406e-06	4.86762e-06	4.86711e-06	4.86412e-06	4.86421e-06	4.86795e-06	4.86717e-06
87958	4.86852e-06	4.86771e-06	4.87475e-06	4.86464e-06	4.8682e-06	4.86769e-06	4.8647e-06	4.86479e-06	4.86853e-06	4.86775e-06
87959	4.8691e-06	4.86829e-06	4.87532e-06	4.86522e-06	4.86878e-06	4.86826e-06	4.86528e-06	4.86537e-06	4.8691e-06	4.86833e-06
87960	4.86967e-06	4.86887e-06	4.87589e-06	4.8658e-06	4.86935e-06	4.86884e-06	4.86586e-06	4.86595e-06	4.86968e-06	4.8689e-06
87961	4.87025e-06	4.86944e-06	4.87646e-06	4.86638e-06	4.86993e-06	4.86941e-06	4.86644e-06	4.86652e-06	4.87025e-06	4.86948e-06
87962	4.87082e-06	4.87001e-06	4.87702e-06	4.86695e-06	4.8705e-06	4.86999e-06	4.86702e-06	4.8671e-06	4.87083e-06	4.87005e-06
87963	4.87139e-06	4.87059e-06	4.87759e-06	4.86753e-06	4.87107e-06	4.87056e-06	4.8676e-06	4.86768e-06	4.8714e-06	4.87062e-06
87964	4.87197e-06	4.87116e-06	4.87815e-06	4.86811e-06	4.87165e-06	4.87113e-06	4.86817e-06	4.86826e-06	4.87197e-06	4.8712e-06
87965	4.87254e-06	4.87173e-06	4.87872e-06	4.86868e-06	4.87222e-06	4.87171e-06	4.86875e-06	4.86883e-06	4.87254e-06	4.87177e-06
87966	4.87311e-06	4.87231e-06	4.87928e-06	4.86926e-06	4.87279e-06	4.87228e-06	4.86932e-06	4.86941e-06	4.87311e-06	4.87234e-06
87967	4.87368e-06	4.87288e-06	4.87984e-06	4.86983e-06	4.87336e-06	4.87285e-06	4.8699e-06	4.86998e-06	4.87368e-06	4.87291e-06
87968	4.87425e-06	4.87345e-06	4.88041e-06	4.87041e-06	4.87393e-06	4.87342e-06	4.87047e-06	4.87055e-06	4.87425e-06	4.87348e-06
87969	4.87482e-06	4.87402e-06	4.88097e-06	4.87098e-06	4.8745e-06	4.87399e-06	4.87104e-06	4.87113e-06	4.87482e-06	4.87405e-06
87970	4.87539e-06	4.87459e-06	4.88153e-06	4.87155e-06	4.87507e-06	4.87456e-06	4.87162e-06	4.8717e-06	4.87539e-06	4.87462e-06
87971	4.87595e-06	4.87515e-06	4.88209e-06	4.87212e-06	4.87564e-06	4.87513e-06	4.87219e-06	4.87227e-06	4.87596e-06	4.87519e-06
87972	4.87652e-06	4.87572e-06	4.88265e-06	4.8727e-06	4.8762e-06	4.8757e-06	4.87276e-06	4.87284e-06	4.87652e-06	4.87576e-06
87973	4.87709e-06	4.87629e-06	4.88321e-06	4.87327e-06	4.87677e-06	4.87626e-06	4.87333e-06	4.87341e-06	4.87709e-06	4.87633e-06
87974	4.87765e-06	4.87686e-06	4.88377e-06	4.87384e-06	4.87734e-06	4.87683e-06	4.8739e-06	4.87398e-06	4.87766e-06	4.87689e-06
87975	4.87822e-06	4.87742e-06	4.88433e-06	4.87441e-06	4.8779e-06	4.8774e-06	4.87447e-06	4.87455e-06	4.87822e-06	4.87746e-06
87976	4.87878e-06	4.87799e-06	4.88488e-06	4.87498e-06	4.87847e-06	4.87796e-06	4.87504e-06	4.87512e-06	4.87879e-06	4.87802e-06
87977	4.87935e-06	4.87855e-06	4.88544e-06	4.87554e-06	4.87903e-06	4.87853e-06	4.87561e-06	4.87569e-06	4.87935e-06	4.87859e-06
87978	4.87991e-06	4.87912e-06	4.88599e-06	4.87611e-06	4.87959e-06	4.87909e-06	4.87617e-06	4.87626e-06	4.87991e-06	4.87915e-06
87979	4.88047e-06	4.87968e-06	4.88655e-06	4.87668e-06	4.88016e-06	4.87965e-06	4.87674e-06	4.87682e-06	4.88048e-06	4.87972e-06
87980	4.88103e-06	4.88024e-06	4.8871e-06	4.87724e-06	4.88072e-06	4.88022e-06	4.87731e-06	4.87739e-06	4.88104e-06	4.88028e-06
87981	4.88159e-06	4.8808e-06	4.88766e-06	4.87781e-06	4.88128e-06	4.88078e-06	4.87787e-06	4.87796e-06	4.8816e-06	4.88084e-06
87982	4.88215e-06	4.88137e-06	4.88821e-06	4.87837e-06	4.88184e-06	4.88134e-06	4.87844e-06	4.87852e-06	4.88216e-06	4.8814e-06
87983	4.88271e-06	4.88193e-06	4.88876e-06	4.87894e-06	4.8824e-06	4.8819e-06	4.879e-06	4.87908e-06	4.88272e-06	4.88196e-06
87984	4.88327e-06	4.88249e-06	4.88931e-06	4.8795e-06	4.88296e-06	4.88246e-06	4.87957e-06	4.87965e-06	4.88328e-06	4.88252e-06
87985	4.88383e-06	4.88305e-06	4.88987e-06	4.88006e-06	4.88352e-06	4.88302e-06	4.88013e-06	4.88021e-06	4.88384e-06	4.88308e-06
87986	4.88439e-06	4.8836e-06	4.89042e-06	4.88063e-06	4.88408e-06	4.88358e-06	4.88069e-06	4.88077e-06	4.88439e-06	4.88364e-06
87987	4.88495e-06	4.88416e-06	4.89096e-06	4.88119e-06	4.88463e-06	4.88414e-06	4.88125e-06	4.88133e-06	4.88495e-06	4.8842e-06
87988	4.8855e-06	4.88472e-06	4.89151e-06	4.88175e-06	4.88519e-06	4.88469e-06	4.88181e-06	4.88189e-06	4.88551e-06	4.88475e-06
87989	4.88606e-06	4.88528e-06	4.89206e-06	4.88231e-06	4.88575e-06	4.88525e-06	4.88237e-06	4.88245e-06	4.88606e-06	4.88531e-06
87990	4.88661e-06	4.88583e-06	4.89261e-06	4.88287e-06	4.8863e-06	4.88581e-06	4.88293e-06	4.88301e-06	4.88662e-06	4.88587e-06
87991	4.88717e-06	4.88639e-06	4.89316e-06	4.88343e-06	4.88686e-06	4.88636e-06	4.88349e-06	4.88357e-06	4.88717e-06	4.88642e-06
87992	4.88772e-06	4.88694e-06	4.8937e-06	4.88399e-06	4.88741e-06	4.88692e-06	4.88405e-06	4.88413e-06	4.88772e-06	4.88698e-06
87993	4.88827e-06	4.88749e-06	4.89425e-06	4.88454e-06	4.88796e-06	4.88747e-06	4.88461e-06	4.88469e-06	4.88828e-06	4.88753e-06
87994	4.88883e-06	4.88805e-06	4.89479e-06	4.8851e-06	4.88851e-06	4.88802e-06	4.88516e-06	4.88524e-06	4.88883e-06	4.88808e-06
87995	4.88938e-06	4.8886e-06	4.89534e-06	4.88566e-06	4.88907e-06	4.88857e-06	4.88572e-06	4.8858e-06	4.88938e-06	4.88864e-06
87996	4.88993e-06	4.88915e-06	4.89588e-06	4.88621e-06	4.88962e-06	4.88913e-06	4.88627e-06	4.88636e-06	4.88993e-06	4.88919e-06
87997	4.89048e-06	4.8897e-06	4.89642e-06	4.88677e-06	4.89017e-06	4.88968e-06	4.88683e-06	4.88691e-06	4.89048e-06	4.88974e-06
87998	4.89103e-06	4.89025e-06	4.89696e-06	4.88732e-06	4.89072e-06	4.89023e-06	4.88738e-06	4.88746e-06	4.89103e-06	4.89029e-06
87999	4.89158e-06	4.8908e-06	4.8975e-06	4.88787e-06	4.89127e-06	4.89078e-06	4.88794e-06	4.88802e-06	4.89158e-06	4.89084e-06
88000	4.89212e-06	4.89135e-06	4.89804e-06	4.88843e-06	4.89182e-06	4.89133e-06	4.88849e-06	4.88857e-06	4.89213e-06	4.89139e-06
88001	4.89267e-06	4.8919e-06	4.89858e-06	4.88898e-06	4.89236e-06	4.89187e-06	4.88904e-06	4.88912e-06	4.89267e-06	4.89194e-06
88002	4.89322e-06	4.89245e-06	4.89912e-06	4.88953e-06	4.89291e-06	4.89242e-06	4.88959e-06	4.88967e-06	4.89322e-06	4.89248e-06
88003	4.89376e-06	4.89299e-06	4.89966e-06	4.89008e-06	4.89346e-06	4.89297e-06	4.89014e-06	4.89022e-06	4.89377e-06	4.89303e-06
88004	4.89431e-06	4.89354e-06	4.9002e-06	4.89063e-06	4.894e-06	4.89352e-06	4.89069e-06	4.89077e-06	4.89431e-06	4.89358e-06
88005	4.89485e-06	4.89409e-06	4.90073e-06	4.89118e-06	4.89455e-06	4.89406e-06	4.89124e-06	4.89132e-06	4.89486e-06	4.89412e-06
88006	4.8954e-06	4.89463e-06	4.90127e-06	4.89173e-06	4.89509e-06	4.89461e-06	4.89179e-06	4.89187e-06	4.8954e-06	4.89467e-06
88007	4.89594e-06	4.89518e-06	4.90181e-06	4.89228e-06	4.89563e-06	4.89515e-06	4.89234e-06	4.89242e-06	4.89594e-06	4.89521e-06
88008	4.89648e-06	4.89572e-06	4.90234e-06	4.89282e-06	4.89618e-06	4.89569e-06	4.89289e-06	4.89297e-06	4.89649e-06	4.89575e-06
88009	4.89702e-06	4.89626e-06	4.90287e-06	4.89337e-06	4.89672e-06	4.89624e-06	4.89343e-06	4.89351e-06	4.89703e-06	4.8963e-06
88010	4.89756e-06	4.8968e-06	4.90341e-06	4.89391e-06	4.89726e-06	4.89678e-06	4.89398e-06	4.89406e-06	4.89757e-06	4.89684e-06
88011	4.89811e-06	4.89734e-06	4.90394e-06	4.89446e-06	4.8978e-06	4.89732e-06	4.89452e-06	4.8946e-06	4.89811e-06	4.89738e-06
88012	4.89864e-06	4.89788e-06	4.90447e-06	4.895e-06	4.89834e-06	4.89786e-06	4.89507e-06	4.89515e-06	4.89865e-06	4.89792e-06
88013	4.89918e-06	4.89842e-06	4.905e-06	4.89555e-06	4.89888e-06	4.8984e-06	4.89561e-06	4.89569e-06	4.89919e-06	4.89846e-06
88014	4.89972e-06	4.89896e-06	4.90553e-06	4.89609e-06	4.89942e-06	4.89894e-06	4.89615e-06	4.89623e-06	4.89972e-06	4.899e-06
88015	4.90026e-06	4.8995e-06	4.90606e-06	4.89663e-06	4.89996e-06	4.89948e-06	4.89669e-06	4.89677e-06	4.90026e-06	4.89954e-06
88016	4.9008e-06	4.90004e-06	4.90659e-06	4.89717e-06	4.90049e-06	4.90001e-06	4.89724e-06	4.89732e-06	4.9008e-06	4.90007e-06
88017	4.90133e-06	4.90058e-06	4.90712e-06	4.89771e-06	4.90103e-06	4.90055e-06	4.89778e-06	4.89786e-06	4.90133e-06	4.90061e-06
88018	4.90187e-06	4.90111e-06	4.90765e-06	4.89825e-06	4.90156e-06	4.90109e-06	4.89832e-06	4.8984e-06	4.90187e-06	4.90115e-06
88019	4.9024e-06	4.90165e-06	4.90817e-06	4.89879e-06	4.9021e-06	4.90162e-06	4.89886e-06	4.89894e-06	4.9024e-06	4.90168e-06
88020	4.90293e-06	4.90218e-06	4.9087e-06	4.89933e-06	4.90263e-06	4.90216e-06	4.89939e-06	4.89947e-06	4.90294e-06	4.90222e-06
88021	4.90347e-06	4.90272e-06	4.90922e-06	4.89987e-06	4.90317e-06	4.90269e-06	4.89993e-06	4.90001e-06	4.90347e-06	4.90275e-06
88022	4.904e-06	4.90325e-06	4.90975e-06	4.90041e-06	4.9037e-06	4.90323e-06	4.90047e-06	4.90055e-06	4.904e-06	4.90328e-06
88023	4.90453e-06	4.90378e-06	4.91027e-06	4.90094e-06	4.90423e-06	4.90376e-06	4.90101e-06	4.90109e-06	4.90453e-06	4.90382e-06
88024	4.90506e-06	4.90431e-06	4.91079e-06	4.90148e-06	4.90476e-06	4.90429e-06	4.90154e-06	4.90162e-06	4.90507e-06	4.90435e-06
88025	4.90559e-06	4.90485e-06	4.91132e-06	4.90202e-06	4.90529e-06	4.90482e-06	4.90208e-06	4.90216e-06	4.9056e-06	4.90488e-06
88026	4.90612e-06	4.90538e-06	4.91184e-06	4.90255e-06	4.90582e-06	4.90535e-06	4.90261e-06	4.90269e-06	4.90613e-06	4.90541e-06
88027	4.90665e-06	4.90591e-06	4.91236e-06	4.90308e-06	4.90635e-06	4.90588e-06	4.90314e-06	4.90322e-06	4.90665e-06	4.90594e-06
88028	4.90718e-06	4.90644e-06	4.91288e-06	4.90362e-06	4.90688e-06	4.90641e-06	4.90368e-06	4.90376e-06	4.90718e-06	4.90647e-06
88029	4.90771e-06	4.90696e-06	4.9134e-06	4.90415e-06	4.90741e-06	4.90694e-06	4.90421e-06	4.90429e-06	4.90771e-06	4.907e-06
88030	4.90823e-06	4.90749e-06	4.91392e-06	4.90468e-06	4.90794e-06	4.90747e-06	4.90474e-06	4.90482e-06	4.90824e-06	4.90752e-06
88031	4.90876e-06	4.90802e-06	4.91443e-06	4.90521e-06	4.90846e-06	4.90799e-06	4.90527e-06	4.90535e-06	4.90876e-06	4.90805e-06
88032	4.90928e-06	4.90854e-06	4.91495e-06	4.90574e-06	4.90899e-06	4.90852e-06	4.9058e-06	4.90588e-06	4.90929e-06	4.90858e-06
88033	4.90981e-06	4.90907e-06	4.91547e-06	4.90627e-06	4.90951e-06	4.90904e-06	4.90633e-06	4.90641e-06	4.90981e-06	4.9091e-06
88034	4.91033e-06	4.90959e-06	4.91598e-06	4.9068e-06	4.91004e-06	4.90957e-06	4.90686e-06	4.90694e-06	4.91033e-06	4.90963e-06
88035	4.91085e-06	4.91012e-06	4.9165e-06	4.90733e-06	4.91056e-06	4.91009e-06	4.90739e-06	4.90746e-06	4.91086e-06	4.91015e-06
88036	4.91138e-06	4.91064e-06	4.91701e-06	4.90785e-06	4.91108e-06	4.91062e-06	4.90791e-06	4.90799e-06	4.91138e-06	4.91067e-06
88037	4.9119e-06	4.91116e-06	4.91752e-06	4.90838e-06	4.9116e-06	4.91114e-06	4.90844e-06	4.90852e-06	4.9119e-06	4.9112e-06
88038	4.91242e-06	4.91168e-06	4.91804e-06	4.9089e-06	4.91212e-06	4.91166e-06	4.90896e-06	4.90904e-06	4.91242e-06	4.91172e-06
88039	4.91294e-06	4.91221e-06	4.91855e-06	4.90943e-06	4.91264e-06	4.91218e-06	4.90949e-06	4.90957e-06	4.91294e-06	4.91224e-06
88040	4.91346e-06	4.91273e-06	4.91906e-06	4.90995e-06	4.91316e-06	4.9127e-06	4.91001e-06	4.91009e-06	4.91346e-06	4.91276e-06
88041	4.91397e-06	4.91324e-06	4.91957e-06	4.91048e-06	4.91368e-06	4.91322e-06	4.91054e-06	4.91061e-06	4.91398e-06	4.91328e-06
88042	4.91449e-06	4.91376e-06	4.92008e-06	4.911e-06	4.9142e-06	4.91374e-06	4.91106e-06	4.91114e-06	4.9145e-06	4.9138e-06
88043	4.91501e-06	4.91428e-06	4.92059e-06	4.91152e-06	4.91472e-06	4.91426e-06	4.91158e-06	4.91166e-06	4.91501e-06	4.91431e-06
88044	4.91553e-06	4.9148e-06	4.9211e-06	4.91204e-06	4.91523e-06	4.91477e-06	4.9121e-06	4.91218e-06	4.91553e-06	4.91483e-06
88045	4.91604e-06	4.91532e-06	4.9216e-06	4.91256e-06	4.91575e-06	4.91529e-06	4.91262e-06	4.9127e-06	4.91604e-06	4.91535e-06
88046	4.91656e-06	4.91583e-06	4.92211e-06	4.91308e-06	4.91626e-06	4.91581e-06	4.91314e-06	4.91322e-06	4.91656e-06	4.91586e-06
88047	4.91707e-06	4.91635e-06	4.92261e-06	4.9136e-06	4.91678e-06	4.91632e-06	4.91366e-06	4.91374e-06	4.91707e-06	4.91638e-06
88048	4.91758e-06	4.91686e-06	4.92312e-06	4.91412e-06	4.91729e-06	4.91684e-06	4.91418e-06	4.91426e-06	4.91759e-06	4.91689e-06
88049	4.91809e-06	4.91737e-06	4.92362e-06	4.91464e-06	4.91781e-06	4.91735e-06	4.9147e-06	4.91477e-06	4.9181e-06	4.9174e-06
88050	4.91861e-06	4.91789e-06	4.92413e-06	4.91515e-06	4.91832e-06	4.91786e-06	4.91521e-06	4.91529e-06	4.91861e-06	4.91792e-06
88051	4.91912e-06	4.9184e-06	4.92463e-06	4.91567e-06	4.91883e-06	4.91837e-06	4.91573e-06	4.91581e-06	4.91912e-06	4.91843e-06
88052	4.91963e-06	4.91891e-06	4.92513e-06	4.91618e-06	4.91934e-06	4.91889e-06	4.91624e-06	4.91632e-06	4.91963e-06	4.91894e-06
88053	4.92014e-06	4.91942e-06	4.92563e-06	4.9167e-06	4.91985e-06	4.9194e-06	4.91676e-06	4.91684e-06	4.92014e-06	4.91945e-06
88054	4.92065e-06	4.91993e-06	4.92613e-06	4.91721e-06	4.92036e-06	4.91991e-06	4.91727e-06	4.91735e-06	4.92065e-06	4.91996e-06
88055	4.92115e-06	4.92044e-06	4.92663e-06	4.91773e-06	4.92087e-06	4.92041e-06	4.91778e-06	4.91786e-06	4.92116e-06	4.92047e-06
88056	4.92166e-06	4.92095e-06	4.92713e-06	4.91824e-06	4.92137e-06	4.92092e-06	4.9183e-06	4.91837e-06	4.92166e-06	4.92098e-06
88057	4.92217e-06	4.92145e-06	4.92763e-06	4.91875e-06	4.92188e-06	4.92143e-06	4.91881e-06	4.91888e-06	4.92217e-06	4.92148e-06
88058	4.92267e-06	4.92196e-06	4.92813e-06	4.91926e-06	4.92239e-06	4.92194e-06	4.91932e-06	4.9194e-06	4.92268e-06	4.92199e-06
88059	4.92318e-06	4.92247e-06	4.92862e-06	4.91977e-06	4.92289e-06	4.92244e-06	4.91983e-06	4.9199e-06	4.92318e-06	4.9225e-06
88060	4.92368e-06	4.92297e-06	4.92912e-06	4.92028e-06	4.9234e-06	4.92295e-06	4.92034e-06	4.92041e-06	4.92368e-06	4.923e-06
88061	4.92418e-06	4.92348e-06	4.92961e-06	4.92079e-06	4.9239e-06	4.92345e-06	4.92085e-06	4.92092e-06	4.92419e-06	4.92351e-06
88062	4.92469e-06	4.92398e-06	4.93011e-06	4.92129e-06	4.9244e-06	4.92396e-06	4.92135e-06	4.92143e-06	4.92469e-06	4.92401e-06
88063	4.92519e-06	4.92448e-06	4.9306e-06	4.9218e-06	4.92491e-06	4.92446e-06	4.92186e-06	4.92194e-06	4.92519e-06	4.92451e-06
88064	4.92569e-06	4.92498e-06	4.93109e-06	4.92231e-06	4.92541e-06	4.92496e-06	4.92237e-06	4.92244e-06	4.92569e-06	4.92502e-06
88065	4.92619e-06	4.92549e-06	4.93159e-06	4.92281e-06	4.92591e-06	4.92546e-06	4.92287e-06	4.92295e-06	4.92619e-06	4.92552e-06
88066	4.92669e-06	4.92599e-06	4.93208e-06	4.92332e-06	4.92641e-06	4.92596e-06	4.92338e-06	4.92345e-06	4.92669e-06	4.92602e-06
88067	4.92719e-06	4.92649e-06	4.93257e-06	4.92382e-06	4.92691e-06	4.92646e-06	4.92388e-06	4.92396e-06	4.92719e-06	4.92652e-06
88068	4.92769e-06	4.92699e-06	4.93306e-06	4.92432e-06	4.92741e-06	4.92696e-06	4.92438e-06	4.92446e-06	4.92769e-06	4.92702e-06
88069	4.92818e-06	4.92748e-06	4.93355e-06	4.92483e-06	4.9279e-06	4.92746e-06	4.92489e-06	4.92496e-06	4.92819e-06	4.92751e-06
88070	4.92868e-06	4.92798e-06	4.93404e-06	4.92533e-06	4.9284e-06	4.92796e-06	4.92539e-06	4.92546e-06	4.92868e-06	4.92801e-06
88071	4.92918e-06	4.92848e-06	4.93452e-06	4.92583e-06	4.9289e-06	4.92846e-06	4.92589e-06	4.92596e-06	4.92918e-06	4.92851e-06
88072	4.92967e-06	4.92897e-06	4.93501e-06	4.92633e-06	4.92939e-06	4.92895e-06	4.92639e-06	4.92646e-06	4.92967e-06	4.929e-06
88073	4.93017e-06	4.92947e-06	4.9355e-06	4.92683e-06	4.92989e-06	4.92945e-06	4.92689e-06	4.92696e-06	4.93017e-06	4.9295e-06
88074	4.93066e-06	4.92996e-06	4.93598e-06	4.92733e-06	4.93038e-06	4.92994e-06	4.92739e-06	4.92746e-06	4.93066e-06	4.92999e-06
88075	4.93115e-06	4.93046e-06	4.93647e-06	4.92783e-06	4.93087e-06	4.93044e-06	4.92788e-06	4.92796e-06	4.93115e-06	4.93049e-06
88076	4.93164e-06	4.93095e-06	4.93695e-06	4.92832e-06	4.93137e-06	4.93093e-06	4.92838e-06	4.92846e-06	4.93165e-06	4.93098e-06
88077	4.93214e-06	4.93144e-06	4.93743e-06	4.92882e-06	4.93186e-06	4.93142e-06	4.92888e-06	4.92895e-06	4.93214e-06	4.93147e-06
88078	4.93263e-06	4.93194e-06	4.93791e-06	4.92931e-06	4.93235e-06	4.93191e-06	4.92937e-06	4.92945e-06	4.93263e-06	4.93196e-06
88079	4.93312e-06	4.93243e-06	4.9384e-06	4.92981e-06	4.93284e-06	4.9324e-06	4.92987e-06	4.92994e-06	4.93312e-06	4.93245e-06
88080	4.9336e-06	4.93292e-06	4.93888e-06	4.9303e-06	4.93333e-06	4.93289e-06	4.93036e-06	4.93044e-06	4.93361e-06	4.93294e-06
88081	4.93409e-06	4.93341e-06	4.93936e-06	4.9308e-06	4.93382e-06	4.93338e-06	4.93085e-06	4.93093e-06	4.9341e-06	4.93343e-06
88082	4.93458e-06	4.93389e-06	4.93983e-06	4.93129e-06	4.9343e-06	4.93387e-06	4.93135e-06	4.93142e-06	4.93458e-06	4.93392e-06
88083	4.93507e-06	4.93438e-06	4.94031e-06	4.93178e-06	4.93479e-06	4.93436e-06	4.93184e-06	4.93191e-06	4.93507e-06	4.93441e-06
88084	4.93555e-06	4.93487e-06	4.94079e-06	4.93227e-06	4.93528e-06	4.93485e-06	4.93233e-06	4.9324e-06	4.93556e-06	4.9349e-06
88085	4.93604e-06	4.93536e-06	4.94127e-06	4.93276e-06	4.93576e-06	4.93533e-06	4.93282e-06	4.93289e-06	4.93604e-06	4.93538e-06
88086	4.93652e-06	4.93584e-06	4.94174e-06	4.93325e-06	4.93625e-06	4.93582e-06	4.93331e-06	4.93338e-06	4.93652e-06	4.93587e-06
88087	4.93701e-06	4.93633e-06	4.94222e-06	4.93374e-06	4.93673e-06	4.9363e-06	4.9338e-06	4.93387e-06	4.93701e-06	4.93635e-06
88088	4.93749e-06	4.93681e-06	4.94269e-06	4.93423e-06	4.93721e-06	4.93679e-06	4.93429e-06	4.93436e-06	4.93749e-06	4.93684e-06
88089	4.93797e-06	4.93729e-06	4.94317e-06	4.93472e-06	4.9377e-06	4.93727e-06	4.93477e-06	4.93485e-06	4.93797e-06	4.93732e-06
88090	4.93845e-06	4.93777e-06	4.94364e-06	4.9352e-06	4.93818e-06	4.93775e-06	4.93526e-06	4.93533e-06	4.93845e-06	4.9378e-06
88091	4.93893e-06	4.93826e-06	4.94411e-06	4.93569e-06	4.93866e-06	4.93823e-06	4.93574e-06	4.93582e-06	4.93893e-06	4.93828e-06
88092	4.93941e-06	4.93874e-06	4.94458e-06	4.93617e-06	4.93914e-06	4.93871e-06	4.93623e-06	4.9363e-06	4.93941e-06	4.93876e-06
88093	4.93989e-06	4.93922e-06	4.94505e-06	4.93666e-06	4.93962e-06	4.93919e-06	4.93671e-06	4.93679e-06	4.93989e-06	4.93924e-06
88094	4.94037e-06	4.9397e-06	4.94552e-06	4.93714e-06	4.9401e-06	4.93967e-06	4.9372e-06	4.93727e-06	4.94037e-06	4.93972e-06
88095	4.94085e-06	4.94018e-06	4.94599e-06	4.93762e-06	4.94058e-06	4.94015e-06	4.93768e-06	4.93775e-06	4.94085e-06	4.9402e-06
[truncated: 105 more rows]
