# Supplementary material for: Computational modeling and quantitative physiology reveal central parameters for brassinosteroid-regulated early cell physiological processes linked to elongation growth of the Arabidopsis root
Source: eLife. 2022 Sep 7;11:e73031. doi: 10.7554/eLife.73031 (PMC9525061; doi:10.7554/eLife.73031)
Supplement: Figure 6—source data 1. [file elife-73031-fig6-data1.xlsx]

## Sheet: 6A
BL [nM]	Experimental Data	Err Experimental Data	Model Data	Err Model Data
0	5.77352	0.325117				Shown values of Fig. 6A
	--		5.66138	0.02178
0.1	5.34828	0.426261	--	--
	--		5.63695	0.01768
1	5.37115	0.44128	--	--
	--		5.58105	0.02162
5	5.18136	0.27769	--	--
	--		5.44157	0.12085
10	5.02328	0.290281	--	--
	--		5.42394	0.1199
50	5.27863	0.416827	--	--
	--		5.40276	0.10466
100	5.25794	0.364893	--	--
	--	--	5.3881	0.09956
Simulation results of 10 models (structurally identical but independent parameterizations). Numbers correspond to the number of the model (internal numbering)
BL [nM]	3	6	14	23	34	38	40	45	47	50				mean	standard deviation
0	5.6744	5.66869	5.59409	5.66266	5.66966	5.67521	5.66534	5.66273	5.66706	5.67396				5.66138	0.0217849
0.1	5.64921	5.64372	5.58369	5.63492	5.64446	5.65021	5.6376	5.63499	5.64195	5.64877				5.63695	0.0176792
1	5.59493	5.58917	5.51507	5.58019	5.59028	5.59569	5.58287	5.58023	5.58761	5.59449				5.58105	0.0216162
5	5.48627	5.48319	5.06142	5.48209	5.48139	5.48975	5.48477	5.4821	5.47904	5.48564				5.44157	0.120849
10	5.46333	5.46373	5.04708	5.47181	5.4584	5.47025	5.47443	5.47176	5.45606	5.46257				5.42394	0.119902
50	5.4206	5.42842	5.07819	5.46425	5.41567	5.43949	5.4664	5.46373	5.43113	5.41975				5.40276	0.104655
100	5.40259	5.41212	5.08325	5.45618	5.39772	5.4187	5.45799	5.45532	5.39537	5.4018				5.3881	0.0995572
Experimental Data
	Meristem
	20102020 1	20102020 2	29092020										Mock	01 BL	1 BL	5 BL	10 BL	50 BL	100 BL
mock 1													5.71449	5.81657	5.71449	5.09081	5.26179	5.09081	4.76294
1	5.71449	5.67195	6.30324										5.31529	5.73539	5.89418	5.34144	5.14966	5.8558	5.49072
2	5.31529	5.36722	6.17194										5.71449	6.00456	5.65029	5.56088	5.34144	5.60615	5.69335
3	5.71449	6.10844	6.09403										6.0223	5.39262	4.72653	5.41766	5.23441	5.23441	5.31529
4	6.0223	5.71449	5.22428										5.8558	4.83356	4.83356	5.23441	4.90147	4.99868	5.5378
5	5.8558	5.62836	5.6347										6.10844	4.88851	5.65029	5.41766	4.83356	4.86784	4.6514
6	6.10844	5.81657	5.6347										5.67195	5.67672	6.07448	5.26179	5.4667	5.39262	5.31529
			5.75758										5.36722	5.11019	5.49072	5.20661	5.20661	5.56088	5.65029
			5.13949										6.10844	4.7832	4.7986	4.86784	5.36722	5.51442	5.31529
			6.24621		3 measurements ; all pooled, then averaged								5.71449	5.6347	4.7986	5.01892	5.20661	5.26179	5.09081
													5.62836	4.95505	5.81565	4.88851	4.76294	4.86784	4.83356
					Error is Standart-Deviation								5.81657		5.30481	5.71766	4.95505	4.5906	4.63102
													6.30324		5.08034	5.11019	5.01892	5.73775	5.67672
01 nM BL 1													6.17194		5.01892	4.63102	4.63102	5.43059	5.67672
1	5.81657		4.88851										6.09403		5.01892	4.95505	4.5906	5.25158	5.33077
2	5.73539		5.67672										5.22428		5.9609		4.41781	6.01214	5.52454
3	6.00456		5.11019										5.6347		5.47826		5.04993	4.46279	4.88851
4	5.39262		4.7832										5.6347
5	4.83356		5.6347										5.75758
			4.95505										5.13949
													6.24621
1 nM BL 1
1	5.71449	5.65029	5.81565
2	5.89418	6.07448	5.30481									mean	5.77352	5.34828	5.37115	5.18136	5.02328	5.27863	5.25794
3	5.65029	5.49072	5.08034									StDev	0.325117	0.426261	0.44128	0.27769	0.290281	0.416827	0.364893
4	4.72653	4.7986	5.01892									n	21	11	17	15	17	17	17
5	4.83356	4.7986	5.01892
			5.9609
			5.47826
5 nM BL
1	5.09081	5.41766	5.01892
		5.26179	4.88851
3	5.34144	5.20661	5.71766									Statistics for experimental Data of Fig. 6A
4	5.56088	4.86784	5.11019
5	5.41766		4.63102									The data is normally distributed (tested by Shapiro-Wilk Test). Variances are equal (tested with Levene Test). ANOVA is allowed.
6	5.23441		4.95505
												Reveals significant differences between groups. Tukey-HSD Post hoc test, shown below point out in which groups the differences are present.
10 nM BL 1
1	5.26179	4.83356	4.95505
2	5.14966	5.4667	5.01892
3	5.34144	5.20661	4.63102																Connecting Letters Report
4	5.23441	5.36722	4.5906
5	4.90147	5.20661	4.41781																Level			Mean
		4.76294	5.04993																Mock	A		5.77352
																			1 BL		B	5.37115
50 nM BL 1																			01 BL		B	5.34828
1	5.09081	5.39262	4.5906																50 BL		B	5.27863
2	5.8558	5.56088	5.73775																100 BL		B	5.25794
3	5.60615	5.51442	5.43059																5 BL		B	5.18136
4	5.23441	5.26179	5.25158																10 BL		B	5.02328
5	4.99868	4.86784	6.01214
6	4.86784		4.46279
																			Levels not connected by same letter are significantly different.
100 nM BL 1
1	4.76294	5.31529	4.63102
2	5.49072	5.65029	5.67672																										Exact p-Values are reported here
3	5.69335	5.31529	5.67672
4	5.31529	5.09081	5.33077
5	5.5378	4.83356	5.52454
6	4.6514		4.88851

## Sheet: 6B
Time [min]	Experimental Data	Err Experimental Data	Model Data	Err Model Data
10	-0.41265	0.213192				Shown values of Fig. 6B
	--		-0.18862	0.07201
20	-0.40809	0.188414	--	--
	--		-0.24593	0.10652
30	-0.27744	0.311289	--	--
	--		-0.2569	0.11925
40	-0.26864	0.265536	--	--
	--		-0.25424	0.11189
50	-0.52748	0.284478	--	--
	--		-0.24894	0.10433
60	-0.33766	0.262113	--	--
	--	--	-0.23908	0.09812
Simulation results of 10 models (structurally identical but independent parameterizations). Numbers correspond to the number of the model (internal numbering)
Time-course
		Modell #
	Time [min]	3	6	14	23	34	38	40	45	47	50				mean	standard deviation
	10	-0.16704	-0.16487	-0.41274	-0.14501	-0.16696	-0.16477	-0.18588	-0.1451	-0.16709	-0.16676				-0.188622	0.0720115
	20	-0.21347	-0.21085	-0.57952	-0.19121	-0.21354	-0.21075	-0.22562	-0.18729	-0.21354	-0.21348				-0.245927	0.106515
	30	-0.21918	-0.2161	-0.63132	-0.21007	-0.21932	-0.21602	-0.22486	-0.19357	-0.21924	-0.21932				-0.2569	0.119248
	40	-0.22133	-0.21752	-0.6052	-0.19721	-0.2215	-0.21748	-0.22197	-0.1973	-0.22135	-0.22154				-0.25424	0.111891
	50	-0.21878	-0.21398	-0.57627	-0.19673	-0.21897	-0.21396	-0.21606	-0.19684	-0.21876	-0.21905				-0.24894	0.104326
	60	-0.21107	-0.20496	-0.54701	-0.19085	-0.21126	-0.20496	-0.20735	-0.19097	-0.211	-0.21139				-0.239082	0.0981235
Experimental Data
																									3 days of measurment with several replicates for mock and BL treatment
										delta pH Meristem															each day of measurement is averaged (e.g. B51)
Meristem	6102020	7102020	21102020			6102020	7102020	21102020		6102020	7102020	21102020
																									Difference is calculated between mock and BL values (B51-G51) shown in K51
10 min BL	4.85799	6.10728	4.64176		10 min mock	5.36335	6.3952	4.84668																	These differences are averaged over the days (see N51); this value is shown in the manuscript
	4.85799	6.02672	5.21951			5.92419	5.88903	5.87154
	5.55916	5.81562	4.24352			5.77745	5.77766																		For the errors the standart deviation of each day is calculated (for both, mock and BL)
	5.48421	5.5295	5.3902			5.69762	5.28976	5.46891																	Since it is mathematically not allowed to just substract SD's, the root must be drawn from the addition of the square roots of the individual SD's.
	5.46481	5.48426	4.4052			5.34211	6.22854	5.33538																	The same is the case for the average of these (see e.g. N52).
	5.42514	5.06926	4.68499			5.1342		5.56795
	5.2763																								Since the values are based on three different days of measurement, the calculated SD can be divided by root three (3 days of replicates) (see N53)
	4.76274															BL	mock	delta pH							(=corrected SD)
	5.10899															Mittelwert alles
																Standardfehler alles
MW	5.1997	5.67211	4.7642			5.53982	5.91604	5.41809		-0.340117	-0.24393	-0.653897	-0.412648			5.21025	5.61935	-0.409103
Stabw	0.310208	0.38853	0.45176			0.304588	0.429928	0.375502		0.133667	0.238647	0.248058	0.369259			0.289243	0.233229	0.522472
Stabw ^2	0.0962289	0.150956	0.204087			0.0927737	0.184838	0.141001					0.213192
20 min BL	5.54081	5.06926	4.64176		20 min mock	5.74608	6.10728	4.76797
	5.48421	5.59512	5.27854			5.82317	6.16902	5.09417
	4.97534	4.70813	4.55147			5.71397	5.88903	5.21951
	5.2763	5.69901	4.95767			5.71397	5.79675	5.49428
	5.61276	6.05942	4.95767			5.50335	6.30003	5.15812
			5.30723					5.61518
MW	5.37789	5.42619	4.94905			5.70011	6.05242	5.22487		-0.322219	-0.626235	-0.275814	-0.408089			5.23217	5.63199	-0.399822
Stabw	0.257574	0.53548	0.31289			0.118699	0.206144	0.301745		0.0678242	0.28987	0.133695	0.326342			0.24391	0.239587	0.483497
Stabw ^2	0.0663446	0.286738	0.0978999			0.0140894	0.0424953	0.0910498					0.188414
30 min BL	5.54081	5.63747	4.29933		30 min mock	6.00514	4.94688	5.02743
	5.55916	5.90688	4.88458			5.95172	6.12294	5.12647
	5.2763	5.73881	5.51923			5.83807	6.51001	5.27854
	5.20712	5.31536	5.15812			5.8081	5.21048	5.02743
	4.85799	5.81562	5.12647			5.85282	6.30003	5.18912
	4.82698	5.38987	5.15812			5.42514		5.24931
	5.68107							5.85174
	5.93803
	5.59513
	5.77745
	5.48421
	4.94695
MW	5.39093	5.634	5.02431			5.8135	5.81807	5.25001		-0.422565	-0.184066	-0.2257	-0.277444			5.36004	5.59563	-0.235588
Stabw	0.366826	0.236465	0.40898			0.204371	0.695007	0.28312		0.140895	0.486261	0.185479	0.539169			0.232633	0.279716	0.512349
Stabw ^2	0.134561	0.0559156	0.167265			0.0417676	0.483035	0.0801567					0.311289
40 min BL	5.36335	5.06926	4.84668		40 min mock	5.91022	5.21048	4.88458
	5.52221	6.21386	5.02743			5.96528	6.25751	5.09417
	5.52221	6.28598	4.12541			5.48421	6.12294	5.06116
	5.69762	5.55167	4.95767			5.0833	6.38193	5.54379
	5.40485	5.38987	5.70547			5.63017	5.90688	5.63825
	4.79524	5.26375	4.64176			5.05711	6.04315
							5.63747
MW	5.38425	5.62906	4.88407			5.52171	5.93719	5.24439		-0.137467	-0.30813	-0.360317	-0.268638			5.29913	5.60625	-0.307127
Stabw	0.311145	0.506668	0.516981			0.392152	0.414772	0.328014		0.181719	0.309027	0.288114	0.459922			0.307877	0.266735	0.574613
Stabw ^2	0.0968111	0.256712	0.26727			0.153783	0.172036	0.107593					0.265536
50 min BL	4.79524	5.73881	5.02743		50 min mock	5.95172	6.22854	4.99295
	5.57727	5.63747	4.50424			5.2763	6.38193	5.36304
	5.46481	4.88212	5.09417			6.10603	6.1538	5.46891
	5.23058	5.0092	5.30723			5.40485	6.04315	6.14146
	5.36335	4.51364	4.35318			5.05711	5.23733	5.09417
	5.05711	5.95931				5.25364	6.30003
MW	5.24806	5.29009	4.85725			5.50828	6.05746	5.4121		-0.260216	-0.767375	-0.554856	-0.527482			5.14795	5.67382	-0.525872
Stabw	0.286517	0.568874	0.408128			0.421154	0.418447	0.451214		0.195447	0.36795	0.263051	0.49273			0.262151	0.287472	0.549623
Stabw ^2	0.082092	0.323617	0.166568			0.177371	0.175098	0.203594					0.284478
60 min BL	5.52221	5.94202	4.99295		60 min mock	6.08151	5.61643	4.29933
	5.74608	5.85273	4.84668			5.8081	6.1538	5.81135
	5.66431	6.07553	4.88458			5.68107	6.32779	5.15812
	5.40485	5.73881	5.27854			5.36335	6.09148	6.1081
	5.34211	5.63747	4.64176			5.52221	6.35508	5.56795
	5.20712	4.97834	4.59728			5.48421	5.50703	5.49428
MW	5.48111	5.70415	4.87363			5.65674	6.0086	5.40652		-0.175627	-0.304455	-0.53289	-0.337657			5.35296	5.69062	-0.337657
Stabw	0.202813	0.387048	0.248663			0.25995	0.362008	0.62888		0.0791089	0.199038	0.400294	0.453993			0.261254	0.282441	0.543695
Stabw ^2	0.0411333	0.149806	0.0618333			0.0675742	0.13105	0.39549					0.262113
Statistics for experimental Data of Fig. 6B
A linear mixed effect model was performed; here: measurement time was used as fixed factor and day of measurment was used as random factor. In this model a Tukey HSD test revelead that there is no influence of the day of measurement. Due to this it would be allowed to pool the values.
However this not ideal, due to the fact, that delta values have to be calculated (see above). Therefore, we have decided to continue to treat the measurement days separately.
Data is normally distributed (tested with Shapiro-Wilk Test) and variances are equal (Levene Test). ANOVA is allowed. Reveals no significant differences between groups. Tukey-HSD Post hoc test, shown below, point out comparisions between all groups. The exact p-values are reported.
																					Exact p-Values are reported here
