# Supplementary material for: Computational modeling and quantitative physiology reveal central parameters for brassinosteroid-regulated early cell physiological processes linked to elongation growth of the Arabidopsis root
Source: eLife. 2022 Sep 7;11:e73031. doi: 10.7554/eLife.73031 (PMC9525061; doi:10.7554/eLife.73031)
Supplement: Figure 7—source data 1. [file elife-73031-fig7-data1.xlsx]

## Sheet: 7A
Distance	Col-0	Err Col-0	bir1-301	Err bir1-301
285.75	73.7241	9.90542	49.9663	3.00564		Shown values of Fig. 7A
476.25	74.982	9.70642	47.6359	5.7422
635	58.3975	10.0737	42.7102	4.10078
952.5	41.8978	6.82983	34.9217	4.52329
1500	19.3267	6.12415	32.2216	4.53537
																																Corresponding RAW Data
	col															bri301
	45	285.75		75	476.25		100	635		150	952.5		2500	1500		285.75			476.25			635			952.5			1500
	102.641	5.48451		104.87	5.48739		87.3036	5.46671		36.9225	5.41051		-3.45983	5.36427
	84.0399	5.53655		69.6504	5.47975		53.9167	5.45396		43.2375	5.43927		24.3418	5.42266		55.1509	5.78429		54.8936	5.71521		52.991	5.69074		52.4039	5.69404		48.114	5.65486
	42.4687	5.76938					43.5496	5.71863		39.727	5.68896		22.9207	5.64404		57.7979	5.75927		62.3974	5.74231		47.2357	5.71561		26.8794	5.6846		23.9421	5.67539
	67.3896	5.92944		74.6239	5.89081		74.9115	5.86792		65.8344	5.80372		33.2092	5.6502		47.7344	5.8473		48.5936	5.79259		41.6119	5.7619		33.9498	5.75939		31.0653	5.73777
	72.081	5.69932		50.7835	5.77359		32.3059	5.74527		23.7674	5.72517		19.6218	5.70209		40.7446	5.88959		44.0213	5.87832		43.4387	5.84943		31.7118	5.79815		34.8281	5.77973
																48.404	5.89899		28.2736	5.84056		28.2736	5.84056		29.6634	5.82904		23.1584	5.77071
MW	73.7241	5.68384		74.982	5.65788		58.3975	5.6505		41.8978	5.61353		19.3267	5.55665		49.9663	5.83589		47.6359	5.7938		42.7102	5.77165		34.9217	5.75304		32.2216	5.72369
SD	19.8108	0.160811		19.4128	0.179197		20.1474	0.16328		13.6597	0.158687		12.2483	0.136019		6.01127	0.0557314		11.4844	0.0602655		8.20155	0.0641582		9.04659	0.0565957		9.07074	0.0502389
SD/2	9.90542	0.0804056		9.70642	0.0895986		10.0737	0.0816401		6.82983	0.0793433		6.12415	0.0680094		3.00564	0.0278657		5.7422	0.0301327		4.10078	0.0320791		4.52329	0.0282978		4.53537	0.0251195
SE	8.85967	0.0719169		9.70642	0.0895986		9.01018	0.0730211		6.10879	0.0709668		5.4776	0.0608295		2.68832	0.0249239	0	5.13598	0.0269515	0	3.66785	0.0286924	0	4.04576	0.0253104	0	4.05656	0.0224675
SE/2	4.42984	0.0359585		4.85321	0.0447993		4.50509	0.0365106		3.05439	0.0354834		2.7388	0.0304147		1.34416	0.0124619	0	2.56799	0.0134758	0	1.83392	0.0143462	0	2.02288	0.0126552	0	2.02828	0.0112338

## Sheet: 7B
	Col0 mock Meristem	Col0 mock meristem realtiv	Col0 mock Early Elong	Col mock earyl elong relative		Col0 BL Meristem	Col0 BL meristem realtiv to mock col0 meristem	Col0 BL Early elongation	Col0 BL early elongation zone realtiv to mock col0 early elongation		bri1-301 mock Meristem	bri1-301 mock Meristem relativ	bri1-301 mock Early elongation	bri1-301 mock Early elongation relative		bri1-301 BL Meristem	bri1-301 BL Meristem relative to bri1-mock meristem	bri1-301 BL Early elongation	bri1-301 BL Early elongation relative to bri1-301 mock early elongation
	0.081	99.6033	0.068	106.778		0.08	98.3737	0.035	54.9595		0.059	77.3035	0.077	137.579		0.064	83.8546	0.049	87.5504
	0.057	70.0912	0.073	114.63		0.073	89.766	0.032	50.2487		0.101	132.333	0.086	153.66		0.082	107.439	0.038	67.8963
	0.095	116.819	0.062	97.3568		0.081	99.6033	0.032	50.2487		0.11	144.125	0.073	130.432		0.086	112.68	0.061	108.991
	0.101	124.197	0.039	61.2406		0.071	87.3066	0.036	56.5298		0.092	120.541	0.048	85.7637		0.08	104.818	0.054	96.4841
	0.087	106.981	0.056	87.9352		0.066	81.1583	0.037	58.1		0.081	106.128	0.043	76.83		0.085	111.369	0.041	73.2565
	0.093	114.359	0.073	114.63		0.078	95.9143	0.035	54.9595		0.066	86.4751	0.039	69.683		0.081	106.128	0.036	64.3228
	0.108	132.804	0.075	117.77		0.075	92.2253	0.053	83.2244		0.07	91.716	0.051	91.1239		0.06	78.6137	0.038	67.8963
	0.082	100.833	0.057	89.5054		0.076	93.455	0.049	76.9433		0.071	93.0262	0.062	110.778		0.06	78.6137	0.041	73.2565
	0.093	114.359	0.066	103.638		0.06	73.7802	0.042	65.9514		0.066	86.4751	0.049	87.5504		0.055	72.0626	0.038	67.8963
	0.061	75.0099	0.048	75.373		0.057	70.0912	0.046	72.2325		0.065	85.1648	0.066	117.925		0.056	73.3728	0.033	58.9625
	0.063	77.4693	0.047	73.8027		0.057	70.0912	0.047	73.8027		0.087	113.99	0.071	126.859		0.055	72.0626	0.037	66.1095
	0.109	134.034	0.064	100.497		0.054	66.4022	0.053	83.2244		0.102	133.643	0.062	110.778		0.084	110.059	0.062	110.778
	0.088	108.211	0.087	136.614		0.082	100.833	0.052	81.6541		0.086	112.68	0.069	123.285		0.091	119.231	0.067	119.712
	0.087	106.981	0.068	106.778		0.066	81.1583	0.058	91.0757		0.071	93.0262	0.043	76.83		0.088	115.3	0.066	117.925
	0.079	97.144	0.052	81.6541		0.041	50.4165	0.039	61.2406		0.078	102.198	0.056	100.058		0.078	102.198	0.056	100.058
	0.088	108.211	0.066	103.638		0.046	56.5649	0.037	58.1		0.082	107.439	0.05	89.3372		0.064	83.8546	0.048	85.7637
	0.065	79.9286	0.068	106.778		0.041	50.4165	0.034	53.3892		0.057	74.683	0.052	92.9107		0.073	95.6467	0.059	105.418
	0.088	108.211	0.051	80.0838		0.04	49.1868	0.031	48.6784		0.061	79.9239	0.044	78.6167		0.067	87.7853	0.05	89.3372
	0.092	113.13	0.051	80.0838		0.038	46.7275	0.029	45.5379		0.048	62.891	0.039	69.683		0.071	93.0262	0.031	55.389
	0.075	92.2253	0.045	70.6622		0.032	39.3495	0.037	58.1		0.052	68.1319	0.041	73.2565		0.062	81.2342	0.04	71.4697
	0.064	78.6989	0.044	69.0919		0.034	41.8088	0.023	36.1162		0.083	108.749	0.05	89.3372		0.054	70.7523	0.045	80.4035
	0.058	71.3209	0.057	89.5054		0.038	46.7275	0.025	39.2568		0.074	96.9569	0.057	101.844		0.044	57.65	0.038	67.8963
	0.075	92.2253	0.053	83.2244		0.035	43.0385	0.029	45.5379		0.072	94.3364	0.048	85.7637		0.062	81.2342	0.042	75.0432
	0.0766061	94.2002	0.080862	126.975		0.057	70.0912	0.043	67.5217		0.094	123.161	0.068	121.499		0.069	90.4057	0.047	83.9769
	0.0723502	88.9669	0.0510707	80.1948		0.0617104	75.8835	0.0595825	93.5607		0.081	106.128	0.063	112.565		0.0680943	89.219	0.0468148	83.6461
	0.0936296	115.134	0.0893737	140.341		0.0617104	75.8835	0.0361751	56.8047		0.086	112.68	0.06	107.205		0.0680943	89.219	0.0617104	110.261
	0.0766061	94.2002	0.0744781	116.951		0.0893737	109.9	0.0446869	70.1705		0.082	107.439	0.06	107.205		0.0617104	80.8548	0.0638384	114.063
	0.0744781	91.5836	0.0851178	133.658		0.0617104	75.8835	0.0510707	80.1948		0.071	93.0262	0.043	76.83		0.0638384	83.6429	0.0425589	76.0419
	0.078734	96.8169	0.0851178	133.658		0.0659663	81.1169	0.040431	63.4876		0.075	98.2671	0.053	94.6974		0.0638384	83.6429	0.0617104	110.261
	0.078734	96.8169	0.0744781	116.951		0.0638384	78.5002	0.0361751	56.8047		0.053	69.4421	0.058	103.631		0.0702222	92.0071	0.0617104	110.261
	0.080862	99.4336				0.0553266	68.0335	0.0446869	70.1705		0.09	117.921	0.054	96.4841		0.0553266	72.4905	0.0574545	102.657
						0.0659663	81.1169	0.0340471	53.4632							0.0617104	80.8548	0.0489428	87.4482
AVER	0.0813226	100	0.0636833	100		0.0594876	73.1501	0.0400267	62.8528		0.0763226	100	0.0559677	100		0.0682448	89.4163	0.0488044	87.2009
StDev	0.013553	16.6658	0.0141077	22.153		0.0159606	19.6263	0.00932362	14.6406		0.0152127	19.9321	0.0118081	21.0981		0.0116486	15.2624	0.0107439	19.1966
StErr	0.0024342	2.99326	0.00257571	4.04456		0.00286022	3.51713	0.00166393	2.61282		0.00273228	3.57991	0.00212081	3.78933		0.00208225	2.72822	0.00193066	3.44959
		RAW-Data and Calculations for Fig. 7B								Rel. Ratio 458/405 [%]	StDev
									Meristem Col-0 mock	100	16.6658		Shown values of Fig. 7B
									Early Elong. Col-0 mock	100	22.153
									Meristem Col-0 BL	73.1501	19.6263
									Early Elong. Col-0 BL	62.8528	14.6406
									Meristem bri1-301 mock	100	19.9321
									Early Elong. bri1-301 mock	100	21.0981
Shown are e.g. in Column B the measured RAW values of all days of measurement for Col-0 mock meristem.									Meristem bri1-301 BL	89.4163	15.2624
These values are averaged (see B34), the error is calculated as standart deviation (see B35)									Early Elong. bri1-301 BL	87.2009	19.1966
The calculated average value was set to 100 percent for the mock treatments, corresponding to this, the relative values are calculated (see e.g. Column C)
As a consequence the average of this column is 100. Error is calculated similar as before.
Statistics for Data of Fig. 7B
The groups are compared seperately (e.g. Col-0 mock Meristem is only compared to Col-0 BL meristem)
Col-0 mock meristem vs. Col-0 BL meristem
Data is normally distrubuted (Shapiro-Wilk Test), variances are equal (Levene Test); pooled two-tailed t-Test is allowed
Col-0 mock early elongation vs. Col-0 BL early elongation
Data is normally distrubuted (Shapiro-Wilk Test), variances are unequal (Levene Test); two-tailed t-Test is allowed
bri1-301 mock meristem vs. bri1-301 BL meristem
Data is normally distrubuted (Shapiro-Wilk Test), variances are equal (Levene Test); pooled two-tailed t-Test is allowed
bri1-301 mock early elongation vs. bri1-301 BL early elongation
Data is not normally distrubuted (Shapiro-Wilk Test), two-tailed Wilcoxon Test needs to be applied

## Sheet: 7C
	_3131403_3pm_1h45				_31317476pm_2h30				_3151108_12_1h30				_3161155.FLX written on 16Mar17				_3151206_13uhr_2h								_31316225pm_2h15				_3131909_8pm_2h45				_3141321_2pm_2h				_3141618_5pm_2h								_3151407_BL				_3161641_bri301+BL
	_3131342.AVC included at 23.0 Deg				_3131737.AVC included at 23.0 Deg				_3151036.AVC included at 23.0 Deg				_3161105.AVC included at 23.0 Deg												_3131342.AVC included at 23.0 Deg				_3131737.AVC included at 23.0 Deg				_3141009.AVC included at 23.0 Deg				_3141433.AVC included at 23.0 Deg								_3151036.AVC included at 23.0 Deg				_3161524.AVC included at 23.0 Deg
	_3131342.AVC				_3131737.AVC				_3151036.AVC				_3161105.AVC												_3131342.AVC				_3131737.AVC				_3141009.AVC				_3141433.AVC								_3151036.AVC				_3161524.AVC
	DMSO	15uhr	1h45		DMSO	18uhr	2h20			12uhr	1h30		Col DMSO												BL	17uhr	2h15		BL	20uht	2h45			14uhr	2h			17uhr	2h						bri301-1	15uhr	2h
	70units				40units	H+	H+			H+	H+			H+	H+										40units	H+	H+		40units				70units	!bending of root				H+	H+						40 min measure, then BL
		H+	H+			4	4			4	4			4	4											4	4			H+	H+			H+	H+			4	4							H+	H+
		4	4		Time	Flux	Concentration		Time	Flux	Concentration		Time	Flux	Concentration										Time	Flux	Concentration			4	4			4	4		Time	Flux	Concentration							4	4
	Time	Flux	Concentration		minutes	nmol.m-2.s-1	pH		minutes	nmol.m-2.s-1	pH		minutes	nmol.m-2.s-1	pH										minutes	nmol.m-2.s-1	pH		Time	Flux	Concentration		Time	Flux	Concentration		minutes	nmol.m-2.s-1	pH						Time	Flux	Concentration		Time
-21.3	minutes	nmol.m-2.s-1	pH																										minutes	nmol.m-2.s-1	pH		minutes	nmol.m-2.s-1	pH										minutes	nmol.m-2.s-1	pH		minutes
-21.2					1	39.3216	5.6993						0.4	92.7853	5.81569										-21.2	43.3647	5.65935		11	35.7611	5.74006
-21.1					1.1	39.0596	5.6997						0.5	53.0403	5.61391										-21.1	44.2239	5.65944		11.1	35.3601	5.74025														0.4	27.3971	5.78704		0.4
-21	14.95	42.149	5.68063	100	18.55	50.5166	5.64908	100	14.95	44.066	5.59663	92.5307	13.95	51.5354	5.63235	100	16.45	62.5047	5.61868	100	#DIV/0!	#DIV/0!	#DIV/0!	#DIV/0!	-2.45	45.1079	5.64097	100	28.55	43.1396	5.71222	100	17.45	82.0021	5.58608	100	14.05	62.3923	5.76586	100	#DIV/0!	#DIV/0!	#DIV/0!	#DIV/0!	39.55	66.7029	#DIV/0!		17.45
-20.9				57.851	1.3	38.4716	5.69975	87.955				48.4646				48.4646				37.4953					-19.7	43.2783	5.65857	98.1704	11.3	34.2769	5.74033	91.1373				17.9979				37.6077				#DIV/0!
-20.8				57.851	1.4	39.1529	5.69852	88.6363				48.4646				48.4646				37.4953					-19.6	44.237	5.66108	99.1291	11.4	34.8352	5.73983	91.6956				17.9979				37.6077				#DIV/0!
-20.7				57.851	1.5	39.2699	5.69803	88.7533				48.4646				48.4646				37.4953					-19.5	46.6222	5.66509	101.514	11.5	34.8792	5.74003	91.7396	0.4			17.9979				37.6077				#DIV/0!
-20.6				57.851	1.6	39.0857	5.69745	88.5691				48.4646				48.4646				37.4953					-19.4	45.3225	5.6656	100.215	11.6	34.0444	5.74015	90.9048	0.5	72.7095	5.56484	90.7074				37.6077				#DIV/0!
-20.5				57.851	1.7	39.3008	5.69656	88.7842				48.4646				48.4646				37.4953					-19.3	44.6054	5.66453	99.4975	11.7	33.7789	5.73916	90.6393	0.6	77.5909	5.56461	95.5888				37.6077				#DIV/0!					0.6
-20.4				57.851	1.8	40.7202	5.69551	90.2036				48.4646				48.4646				37.4953					-19.2	44.9362	5.66451	99.8283	11.8	34.064	5.73863	90.9244	0.7	77.7767	5.56909	95.7746				37.6077				#DIV/0!					0.7
-20.3				57.851	1.9	40.1573	5.69614	89.6407				48.4646				48.4646				37.4953					-19.1	45.9273	5.6649	100.819	11.9	33.5421	5.73842	90.4025	0.8	72.6035	5.57261	90.6014				37.6077				#DIV/0!					0.8
-20.2				57.851	2	39.2084	5.69741	88.6918				48.4646				48.4646				37.4953					-19	46.406	5.66399	101.298	12	32.934	5.73895	89.7944	0.9	73.3703	5.57162	91.3682				37.6077				#DIV/0!					0.9
-20.1				57.851	2.1	40.3008	5.69763	89.7842				48.4646				48.4646				37.4953					-18.9	45.9494	5.66356	100.841	12.1	33.0289	5.7387	89.8893	1	76.1724	5.57004	94.1703				37.6077				#DIV/0!					1
-20				57.851	2.2	40.4367	5.69641	89.9201				48.4646				48.4646				37.4953					-18.8	44.789	5.66376	99.6811	12.2	32.7135	5.73835	89.5739	1.1	75.4026	5.57096	93.4005				37.6077				#DIV/0!					1.1
-19.9				57.851	2.3	41.2312	5.69522	90.7146				48.4646				48.4646				37.4953					-18.7	44.2819	5.66254	99.174	12.3	32.868	5.73755	89.7284	1.2	72.7115	5.57247	90.7094				37.6077				#DIV/0!					1.2
-19.8				57.851	2.4	42.2484	5.69316	91.7318				48.4646				48.4646				37.4953					-18.6	45.1486	5.6621	100.041	12.4	33.5475	5.73661	90.4079	1.3	72.4662	5.57158	90.4641				37.6077				#DIV/0!	23.4	70.3276			1.3
-19.7				57.851	2.5	41.8731	5.69214	91.3565				48.4646				48.4646				37.4953					-18.5	44.7471	5.6627	99.6392	12.5	33.1377	5.73649	89.9981	1.4	73.5226	5.57108	91.5205				37.6077				#DIV/0!	23.5	70.151			1.4
-19.6				57.851	2.6	42.1921	5.69172	91.6755				48.4646				48.4646				37.4953					-18.4	44.0386	5.66371	98.9307	12.6	33.0068	5.73693	89.8672	1.5	74.0622	5.57154	92.0601				37.6077				#DIV/0!	23.6	69.5559			1.5
-19.5				57.851	2.7	42.0676	5.69166	91.551				48.4646				48.4646				37.4953					-18.3	45.0902	5.66398	99.9823	12.7	33.7784	5.73725	90.6388	1.6	74.8951	5.57139	92.893				37.6077				#DIV/0!	23.7	70.381			1.6
-19.4				57.851	2.8	42.1391	5.69176	91.6225				48.4646				48.4646				37.4953					-18.2	45.3669	5.66289	100.259	12.8	33.5513	5.73649	90.4117	1.7	73.7966	5.57204	91.7945				37.6077				#DIV/0!	23.8	70.6534			1.7
-19.3				57.851	2.9	42.2381	5.69196	91.7215				48.4646				48.4646				37.4953					-18.1	44.2605	5.662	99.1526	12.9	33.8875	5.73534	90.7479	1.8	73.7548	5.57366	91.7527				37.6077				#DIV/0!	23.9	69.3855			1.8
-19.2				57.851	3	41.2729	5.69201	90.7563				48.4646				48.4646				37.4953					-18	43.5057	5.66261	98.3978	13	34.7373	5.73387	91.5977	1.9	73.5274	5.57551	91.5253				37.6077				#DIV/0!	24	69.6749			1.9
-19.1				57.851	3.1	40.9442	5.69085	90.4276				48.4646				48.4646				37.4953					-17.9	43.6332	5.66235	98.5253	13.1	33.6438	5.73338	90.5042	2	71.7911	5.57728	89.789				37.6077				#DIV/0!	24.1	70.5588			2
-19				57.851	3.2	40.8374	5.69024	90.3208				48.4646				48.4646				37.4953					-17.8	44.7575	5.66197	99.6496	13.2	32.6327	5.73439	89.4931	2.1	71.0243	5.57761	89.0222				37.6077				#DIV/0!	24.2	69.04			2.1
-18.9				57.851	3.3	41.8557	5.68943	91.3391				48.4646				48.4646				37.4953					-17.7	45.8103	5.66294	100.702	13.3	33.4947	5.73416	90.3551	2.2	72.3088	5.57865	90.3067				37.6077				#DIV/0!	24.3	69.1379			2.2
-18.8				57.851	3.4	43.2971	5.68742	92.7805				48.4646				48.4646				37.4953					-17.6	45.3703	5.66247	100.262	13.4	34.388	5.7328	91.2484	2.3	72.9769	5.58114	90.9748				37.6077				#DIV/0!	24.4	70.0335			2.3
-18.7				57.851	3.5	42.8278	5.68698	92.3112				48.4646				48.4646				37.4953					-17.5	44.2631	5.66139	99.1552	13.5	34.2301	5.73249	91.0905	2.4	71.8161	5.58255	89.814				37.6077				#DIV/0!	24.5	69.8851			2.4
-18.6				57.851	3.6	43.2596	5.68719	92.743				48.4646				48.4646				37.4953					-17.4	44.2	5.66183	99.0921	13.6	34.2655	5.73242	91.1259	2.5	70.1829	5.58302	88.1808				37.6077				#DIV/0!	24.6	69.18			2.5
-18.5				57.851	3.7	44.0409	5.68796	93.5243				48.4646				48.4646				37.4953					-17.3	44.3854	5.66225	99.2775	13.7	33.2995	5.73239	90.1599	2.6	69.5156	5.58507	87.5135				37.6077				#DIV/0!	24.7	70.3975			2.6
-18.4				57.851	3.8	43.8802	5.68765	93.3636				48.4646				48.4646				37.4953					-17.2	44.0843	5.66239	98.9764	13.8	32.5537	5.73365	89.4141	2.7	69.5113	5.58677	87.5092				37.6077				#DIV/0!	24.8	73.3505			2.7
-18.3				57.851	3.9	44.5037	5.6871	93.9871				48.4646				48.4646				37.4953					-17.1	44.4009	5.66217	99.293	13.9	32.6765	5.73404	89.5369	2.8	69.0464	5.5882	87.0443				37.6077				#DIV/0!	24.9	73.1328			2.8
-18.2				57.851	4	44.7163	5.68584	94.1997	0.4			48.4646				48.4646				37.4953					-17	45.5261	5.66157	100.418	14	33.0329	5.73422	89.8933	2.9	68.7823	5.58938	86.7802				37.6077				#DIV/0!	25	71.7881			2.9
-18.1				57.851	4.1	43.3774	5.68469	92.8608	0.5	50.5004	5.62561	98.965				48.4646				37.4953					-16.9	46.0725	5.66231	100.965	14.1	32.4734	5.73491	89.3338	3	68.5399	5.59064	86.5378				37.6077				#DIV/0!	25.1	69.8567			3
-18	0.6	25.3876	5.71537	83.2386	4.2	43.0272	5.68535	92.5106	0.6	51.7302	5.62415	100.195				48.4646				37.4953					-16.8	46.0332	5.66227	100.925	14.2	32.042	5.73627	88.9024	3.1	68.7634	5.59186	86.7613				37.6077				#DIV/0!	25.2	68.2969			3.1
-17.9	0.7	30.825	5.72189	88.676	4.3	43.4475	5.68566	92.9309	0.7	49.686	5.62391	98.1506				48.4646				37.4953					-16.7	45.9841	5.66217	100.876	14.3	33.0815	5.73718	89.9419	3.2	68.4547	5.59265	86.4526				37.6077				#DIV/0!	25.3	68.4469			3.2
-17.8	0.8	32.3192	5.72029	90.1702	4.4	42.6458	5.68541	92.1292	0.8	46.8405	5.62606	95.3051				48.4646				37.4953					-16.6	45.4747	5.66215	100.367	14.4	33.5139	5.73662	90.3743	3.3	66.5274	5.59325	84.5253				37.6077				#DIV/0!	25.4	68.6271			3.3
-17.7	0.9	32.4952	5.72062	90.3462	4.5	43.4899	5.68412	92.9733	0.9	47.5502	5.6252	96.0148				48.4646				37.4953					-16.5	45.265	5.66149	100.157	14.5	33.3035	5.73657	90.1639	3.4	64.6487	5.59575	82.6466				37.6077				#DIV/0!	25.5	67.9603			3.4
-17.6	1	31.4998	5.72066	89.3508	4.6	44.8647	5.68194	94.3481	1	47.954	5.62363	96.4186				48.4646				37.4953					-16.4	45.5727	5.66118	100.465	14.6	32.9341	5.73681	89.7945	3.5	64.6663	5.59669	82.6642				37.6077				#DIV/0!	25.6	66.7441			3.5
-17.5	1.1	31.1793	5.71932	89.0303	4.7	44.1228	5.68119	93.6062	1.1	47.9499	5.62233	96.4145				48.4646				37.4953					-16.3	45.7362	5.66121	100.628	14.7	32.4367	5.73658	89.2971	3.6	65.089	5.59747	83.0869				37.6077				#DIV/0!	25.7	67.3403			3.6
-17.4	1.2	31.6043	5.71857	89.4553	4.8	44.236	5.68146	93.7194	1.2	49.5814	5.62119	98.046				48.4646				37.4953					-16.2	44.8541	5.66103	99.7462	14.8	31.599	5.73703	88.4594	3.7	65.4683	5.5988	83.4662				37.6077				#DIV/0!	25.8	68.8657			3.7
-17.3	1.3	32.6787	5.71832	90.5297	4.9	43.6509	5.6819	93.1343	1.3	49.6627	5.62178	98.1273				48.4646				37.4953					-16.1	44.0409	5.65973	98.933	14.9	31.5355	5.73641	88.3959	3.8	64.8556	5.59953	82.8535	0.4	50.5214	5.87799	88.1291				#DIV/0!	25.9	68.2706			3.8
-17.2	1.4	33.7925	5.71662	91.6435	5	42.5249	5.683	92.0083	1.4	48.3892	5.6222	96.8538				48.4646				37.4953					-16	44.752	5.65961	99.6441	15	32.5911	5.73594	89.4515	3.9	66.1356	5.59973	84.1335	0.5	61.2834	5.78324	98.8911				#DIV/0!	26	66.9586			3.9
-17.1	1.5	34.5134	5.71627	92.3644	5.1	42.5312	5.68285	92.0146	1.5	49.4053	5.62121	97.8699				48.4646				37.4953					-15.9	45.6499	5.66036	100.542	15.1	33.7996	5.73683	90.66	4	67.5052	5.59855	85.5031	0.6	62.6353	5.78292	100.243				#DIV/0!	26.1	68.1522			4
-17	1.6	35.0576	5.71497	92.9086	5.2	42.8544	5.68271	92.3378	1.6	51.1621	5.61919	99.6267				48.4646				37.4953					-15.8	44.7324	5.65989	99.6245	15.2	34.402	5.73601	91.2624	4.1	68.211	5.59862	86.2089	0.7	66.8599	5.78471	104.468				#DIV/0!	26.2	69.4028			4.1
-16.9	1.7	34.7937	5.71427	92.6447	5.3	43.0282	5.68295	92.5116	1.7	51.9363	5.6189	100.401	0.7	45.6693	5.61858	94.1339				37.4953					-15.7	43.8912	5.65822	98.7833	15.3	34.2116	5.73591	91.072	4.2	69.3465	5.59793	87.3444	0.8	67.6745	5.77927	105.282				#DIV/0!	26.3	67.4721			4.2
-16.8	1.8	35.1374	5.71401	92.9884	5.4	42.508	5.68295	91.9914	1.8	51.3296	5.61777	99.7942	0.8	44.6515	5.62072	93.1161				37.4953					-15.6	44.6673	5.65781	99.5594	15.4	33.8606	5.73607	90.721	4.3	69.3766	5.59833	87.3745	0.9	65.6013	5.77378	103.209				#DIV/0!	26.4	65.5924			4.3
-16.7	1.9	37.5791	5.71419	95.4301	5.5	41.4349	5.6823	90.9183	1.9	48.7375	5.6158	97.2021	0.9	44.7489	5.62202	93.2135				37.4953					-15.5	44.666	5.6583	99.5581	15.5	33.4554	5.73578	90.3158	4.4	68.4194	5.59862	86.4173	1	65.8551	5.77291	103.463				#DIV/0!	26.5	65.9024			4.4
-16.6	2	38.1053	5.711	95.9563	5.6	40.6098	5.68306	90.0932	2	48.0586	5.61701	96.5232	1	44.1491	5.62308	92.6137				37.4953					-15.4	44.4097	5.65874	99.3018	15.6	32.4357	5.73607	89.2961	4.5	69.8229	5.59796	87.8208	1.1	65.9174	5.77223	103.525				#DIV/0!	26.6	65.3311			4.5
-16.5	2.1	35.564	5.70816	93.415	5.7	41.0588	5.68289	90.5422	2.1	48.4258	5.61762	96.8904	1.1	43.8048	5.62361	92.2694				37.4953					-15.3	44.4545	5.65891	99.3466	15.7	32.2262	5.73502	89.0866	4.6	72.0364	5.59594	90.0343	1.2	66.5695	5.77162	104.177				#DIV/0!	26.7	65.1224			4.6
-16.4	2.2	35.2768	5.70908	93.1278	5.8	41.3948	5.68218	90.8782	2.2	48.4641	5.61773	96.9287	1.2	43.284	5.62446	91.7486				37.4953					-15.2	43.81	5.659	98.7021	15.8	32.43	5.73435	89.2904	4.7	72.0296	5.59589	90.0275	1.3	66.3626	5.77188	103.97				#DIV/0!	26.8	65.8415			4.7
-16.3	2.3	35.4548	5.70972	93.3058	5.9	40.9264	5.6818	90.4098	2.3	49.1022	5.6179	97.5668	1.3	42.5247	5.62484	90.9894				37.4953					-15.1	43.4132	5.65831	98.3053	15.9	32.4761	5.73388	89.3365	4.8	71.8376	5.59585	89.8355	1.4	65.9251	5.7724	103.533				#DIV/0!	26.9	65.2318			4.8
-16.2	2.4	35.1128	5.71005	92.9638	6	41.7916	5.68204	91.275	2.4	48.3226	5.61733	96.7873	1.4	39.7773	5.62599	88.2419				37.4953					-15	43.9347	5.65819	98.8268	16	32.8324	5.7334	89.6928	4.9	70.6554	5.59561	88.6533	1.5	66.4152	5.77236	104.023				#DIV/0!	27	63.5255			4.9
-16.1	2.5	35.2915	5.70995	93.1425	6.1	41.8994	5.68339	91.3828	2.5	48.4763	5.61579	96.9409	1.5	40.4999	5.62434	88.9645				37.4953					-14.9	45.2287	5.65871	100.121	16.1	33.2664	5.73335	90.1268	5	70.304	5.59664	88.3019	1.6	66.8433	5.77156	104.451				#DIV/0!	27.1	64.2772			5
-16	2.6	35.7133	5.70962	93.5643	6.2	40.8964	5.68444	90.3798	2.6	48.6783	5.61428	97.1429	1.6	43.332	5.62208	91.7966				37.4953					-14.8	45.5965	5.65755	100.489	16.2	34.1789	5.73273	91.0393	5.1	71.5362	5.59748	89.5341	1.7	66.236	5.77124	103.844				#DIV/0!	27.2	66.2549			5.1
-15.9	2.7	36.1376	5.70983	93.9886	6.3	41.3001	5.68437	90.7835	2.7	47.9992	5.6128	96.4638	1.7	41.2501	5.62258	89.7147				37.4953					-14.7	45.3502	5.65671	100.242	16.3	34.9446	5.73326	91.805	5.2	71.3962	5.59688	89.3941	1.8	66.1942	5.77194	103.802				#DIV/0!	27.3	65.6464			5.2
-15.8	2.8	35.9427	5.70943	93.7937	6.4	41.4283	5.6838	90.9117	2.8	47.6585	5.61227	96.1231	1.8	39.1177	5.62523	87.5823				37.4953					-14.6	45.4935	5.65627	100.386	16.4	34.7	5.73271	91.5604	5.3	70.8208	5.59604	88.8187	1.9	66.4427	5.77275	104.05				#DIV/0!	27.4	63.8717			5.3
-15.7	2.9	35.4769	5.70873	93.3279	6.5	42.1098	5.68332	91.5932	2.9	47.0314	5.61129	95.496	1.9	40.6119	5.62589	89.0765				37.4953					-14.5	44.7352	5.65596	99.6273	16.5	33.9172	5.73178	90.7776	5.4	71.1877	5.59594	89.1856	2	66.3894	5.77297	103.997				#DIV/0!	27.5	64.5841			5.4
-15.6	3	34.8667	5.70873	92.7177	6.6	42.322	5.68205	91.8054	3	48.2515	5.61113	96.7161	2	43.4256	5.62489	91.8902				37.4953					-14.4	44.936	5.65662	99.8281	16.6	33.7936	5.73198	90.654	5.5	71.4197	5.59621	89.4176	2.1	66.3426	5.77317	103.95				#DIV/0!	27.6	66.1624			5.5
-15.5	3.1	34.8981	5.70791	92.7491	6.7	41.6336	5.6809	91.117	3.1	48.8617	5.61232	97.3263	2.1	43.8539	5.62678	92.3185				37.4953					-14.3	45.8921	5.65762	100.784	16.7	33.5899	5.73204	90.4503	5.6	72.3006	5.59619	90.2985	2.2	65.9151	5.77339	103.523				#DIV/0!	27.7	65.4312			5.6
-15.4	3.2	35.713	5.70714	93.564	6.8	41.575	5.68073	91.0584	3.2	47.6708	5.61267	96.1354	2.2	44.0322	5.62801	92.4968				37.4953					-14.2	45.6451	5.6573	100.537	16.8	32.8656	5.73237	89.726	5.7	72.3132	5.59709	90.3111	2.3	66.406	5.773	104.014				#DIV/0!	27.8	63.9019			5.7
-15.3	3.3	36.5871	5.70738	94.4381	6.9	42.4488	5.68048	91.9322	3.3	47.2679	5.61173	95.7325	2.3	43.9266	5.62956	92.3912	4.8	61.0209	5.63463	98.5162					-14.1	45.5044	5.65664	100.396	16.9	32.637	5.73177	89.4974	5.8	70.7743	5.59781	88.7722	2.4	67.2179	5.77192	104.826				#DIV/0!	27.9	65.0059			5.8
-15.2	3.4	36.7174	5.70642	94.5684	7	43.3397	5.67917	92.8231	3.4	47.337	5.61136	95.8016	2.4	44.3217	5.63106	92.7863	4.9	60.5335	5.6349	98.0288					-14	45.9775	5.65624	100.87	17	33.4619	5.73153	90.3223	5.9	70.7226	5.59705	88.7205	2.5	66.7434	5.77186	104.351				#DIV/0!	28	66.6905			5.9
-15.1	3.5	35.9205	5.70552	93.7715	7.1	43.4873	5.6788	92.9707	3.5	46.9231	5.61102	95.3877	2.5	45.3205	5.63315	93.7851	5	60.1239	5.63566	97.6192					-13.9	45.8802	5.65637	100.772	17.1	34.8968	5.73236	91.7572	6	71.6748	5.59648	89.6727	2.6	65.4598	5.77256	103.067				#DIV/0!	28.1	67.0546			6
-15	3.6	35.9874	5.7058	93.8384	7.2	44.1862	5.6783	93.6696	3.6	47.7089	5.61119	96.1735	2.6	40.6416	5.63392	89.1062	5.1	60.3703	5.6361	97.8656					-13.8	45.4235	5.6566	100.316	17.2	35.1431	5.7312	92.0035	6.1	72.0763	5.5968	90.0742	2.7	65.0841	5.77142	102.692				#DIV/0!	28.2	67.605			6.1
-14.9	3.7	36.6502	5.7062	94.5012	7.3	44.9593	5.67859	94.4427	3.7	47.7842	5.61225	96.2488	2.7	37.9727	5.62972	86.4373	5.2	60.3594	5.6362	97.8547					-13.7	45.4263	5.6563	100.318	17.3	34.7318	5.73024	91.5922	6.2	72.7232	5.59664	90.7211	2.8	65.9847	5.77113	103.592				#DIV/0!	28.3	68.7197			6.2
-14.8	3.8	36.2875	5.70566	94.1385	7.4	44.2122	5.6779	93.6956	3.8	46.3594	5.6131	94.824	2.8	39.3901	5.6288	87.8547	5.3	61.5621	5.6363	99.0574					-13.6	45.7652	5.65604	100.657	17.4	34.7092	5.72993	91.5696	6.3	72.1546	5.59714	90.1525	2.9	66.214	5.77218	103.822				#DIV/0!	28.4	69.2163			6.3
-14.7	3.9	38.1256	5.70457	95.9766	7.5	44.2324	5.6762	93.7158	3.9	47.2957	5.61245	95.7603	2.9	39.5774	5.62932	88.042	5.4	61.9588	5.63507	99.4541					-13.5	45.7972	5.65616	100.689	17.5	35.5254	5.72955	92.3858	6.4	70.0198	5.59815	88.0177	3	66.099	5.77262	103.707				#DIV/0!	28.5	68.9649			6.4
-14.6	4	40.0054	5.70114	97.8564	7.6	44.9664	5.67469	94.4498	4	48.5308	5.61083	96.9954	3	41.7032	5.62958	90.1678	5.5	60.4929	5.63409	97.9882					-13.4	45.8467	5.65622	100.739	17.6	36.6201	5.72814	93.4805	6.5	69.6386	5.59709	87.6365	3.1	66.2874	5.77299	103.895				#DIV/0!	28.6	69.5831			6.5
-14.5	4.1	38.0429	5.6998	95.8939	7.7	44.6121	5.67388	94.0955	4.1	47.2351	5.6104	95.6997	3.1	45.018	5.63215	93.4826	5.6	60.3917	5.63485	97.887					-13.3	46.5968	5.65635	101.489	17.7	37.3205	5.72801	94.1809	6.6	71.6469	5.59661	89.6448	3.2	66.0735	5.77297	103.681				#DIV/0!	28.7	69.1207			6.6
-14.4	4.2	37.5718	5.70124	95.4228	7.8	44.4953	5.6736	93.9787	4.2	46.3794	5.61146	94.844	3.2	47.5125	5.63088	95.9771	5.7	60.1793	5.63562	97.6746					-13.2	46.1942	5.65554	101.086	17.8	38.027	5.72698	94.8874	6.7	72.8288	5.59815	90.8267	3.3	66.3233	5.77261	103.931				#DIV/0!	28.8	68.7767			6.7
-14.3	4.3	38.3106	5.70221	96.1616	7.9	44.8717	5.67315	94.3551	4.3	47.1683	5.6117	95.6329	3.3	47.2199	5.63215	95.6846	5.8	59.7339	5.6365	97.2292					-13.1	45.0276	5.65413	99.9197	17.9	38.1903	5.72676	95.0507	6.8	71.4204	5.59818	89.4183	3.4	65.7023	5.77195	103.31				#DIV/0!	28.9	67.9565			6.8
-14.2	4.4	38.5704	5.70208	96.4214	8	46.1242	5.6723	95.6076	4.4	46.8008	5.61102	95.2654	3.4	44.6923	5.63358	93.1569	5.9	60.5926	5.63702	98.0879					-13	45.013	5.65434	99.9051	18	37.739	5.72635	94.5994	6.9	71.2168	5.59674	89.2147	3.5	64.9973	5.77016	102.605				#DIV/0!	29	67.3966			6.9
-14.1	4.5	39.0902	5.70229	96.9412	8.1	47.4289	5.67285	96.9123	4.5	46.2588	5.60986	94.7234	3.5	41.6654	5.63245	90.13	6	60.5488	5.63654	98.0441					-12.9	44.8152	5.65455	99.7073	18.1	38.3906	5.7253	95.251	7	72.5369	5.59576	90.5348	3.6	66.1044	5.76989	103.712				#DIV/0!	29.1	67.723			7
-14	4.6	37.7235	5.70177	95.5745	8.2	46.9702	5.67176	96.4536	4.6	47.1036	5.60943	95.5682	3.6	41.832	5.63471	90.2966	6.1	60.3436	5.63593	97.8389					-12.8	44.8654	5.65498	99.7575	18.2	38.7182	5.72352	95.5786	7.1	72.6182	5.59599	90.6161	3.7	66.6828	5.77128	104.29				#DIV/0!	29.2	66.5421			7.1
-13.9	4.7	36.0051	5.69937	93.8561	8.3	45.3675	5.66996	94.8509	4.7	48.2508	5.6099	96.7154	3.7	45.0566	5.63739	93.5212	6.2	59.9715	5.63564	97.4668					-12.7	45.6913	5.65552	100.583	18.3	38.2943	5.72195	95.1547	7.2	73.4065	5.5961	91.4044	3.8	66.5541	5.77144	104.162				#DIV/0!	29.3	65.67			7.2
-13.8	4.8	36.7592	5.69953	94.6102	8.4	45.609	5.67033	95.0924	4.8	47.6437	5.60903	96.1084	3.8	47.0392	5.63626	95.5038	6.3	60.5402	5.6349	98.0355					-12.6	45.4024	5.65498	100.294	18.4	39.5807	5.72112	96.4411	7.3	73.4379	5.59705	91.4358	3.9	66.0429	5.77143	103.651				#DIV/0!	29.4	66.3151			7.3
-13.7	4.9	37.6237	5.70071	95.4747	8.5	47.2439	5.67104	96.7273	4.9	47.4429	5.60738	95.9075	3.9	49.2064	5.63716	97.671	6.4	61.9933	5.63365	99.4886					-12.5	44.7444	5.65401	99.6365	18.5	40.1244	5.72186	96.9848	7.4	72.4219	5.5978	90.4198	4	65.1711	5.77223	102.779				#DIV/0!	29.5	65.7875			7.4
-13.6	5	37.0215	5.7006	94.8725	8.6	47.3282	5.66968	96.8116	5	48.6733	5.60615	97.1379	4	50.2069	5.63559	98.6715	6.5	62.7103	5.63379	100.206					-12.4	45.0659	5.65398	99.958	18.6	39.3718	5.7218	96.2322	7.5	72.6178	5.59761	90.6157	4.1	64.4478	5.77185	102.055				#DIV/0!	29.6	62.9159			7.5
-13.5	5.1	37.5016	5.69968	95.3526	8.7	47.2367	5.66825	96.7201	5.1	48.8943	5.60614	97.3589	4.1	45.7273	5.63492	94.1919	6.6	62.958	5.63313	100.453					-12.3	45.0227	5.65433	99.9148	18.7	38.6922	5.72077	95.5526	7.6	72.871	5.59725	90.8689	4.2	64.178	5.77269	101.786				#DIV/0!	29.7	63.5862			7.6
-13.4	5.2	38.5928	5.69823	96.4438	8.8	48.0733	5.66711	97.5567	5.2	48.3031	5.60588	96.7677	4.2	41.6084	5.63919	90.073	6.7	62.2904	5.63264	99.7857					-12.2	44.4293	5.65469	99.3214	18.8	39.315	5.72073	96.1754	7.7	73.3614	5.59709	91.3593	4.3	64.3283	5.77331	101.936				#DIV/0!	29.8	65.9772			7.7
-13.3	5.3	38.9411	5.69805	96.7921	8.9	47.9264	5.66682	97.4098	5.3	47.574	5.60493	96.0386	4.3	43.0673	5.63945	91.5319	6.8	61.5749	5.63295	99.0702					-12.1	44.9174	5.65437	99.8095	18.9	40.6297	5.72149	97.4901	7.8	74.7512	5.59644	92.7491	4.4	64.1457	5.77354	101.753				#DIV/0!	29.9	66.4855			7.8
-13.2	5.4	39.6306	5.69743	97.4816	9	47.8355	5.66675	97.3189	5.4	47.6334	5.60491	96.0981	4.4	44.3411	5.63807	92.8057	6.9	61.0721	5.63252	98.5674					-12	46.1852	5.65349	101.077	19	40.3948	5.72046	97.2552	7.9	76.1051	5.59714	94.103	4.5	64.8631	5.77354	102.471				#DIV/0!	30	66.9808			7.9
-13.1	5.5	37.7207	5.69765	95.5717	9.1	48.6471	5.66656	98.1305	5.5	47.699	5.60495	96.1636	4.5	43.9294	5.63794	92.394	7	60.9494	5.63271	98.4447					-11.9	46.4654	5.65406	101.357	19.1	39.8658	5.71901	96.7262	8	76.4739	5.59629	94.4718	4.6	65.1854	5.77242	102.793				#DIV/0!	30.1	64.2528			8
-13	5.6	35.678	5.70037	93.529	9.2	49.1721	5.66543	98.6555	5.6	46.987	5.60491	95.4517	4.6	44.4443	5.63827	92.9089	7.1	61.2938	5.63279	98.7891					-11.8	45.7041	5.6542	100.596	19.2	40.2671	5.7184	97.1275	8.1	75.7855	5.59567	93.7834	4.7	64.8193	5.77153	102.427				#DIV/0!	30.2	63.8561			8.1
-12.9	5.7	38.2881	5.70068	96.1391	9.3	49.4352	5.66477	98.9186	5.7	45.2692	5.60408	93.7338	4.7	44.7659	5.6392	93.2305	7.2	60.8511	5.63249	98.3464					-11.7	45.1038	5.65344	99.9959	19.3	39.9667	5.71825	96.8271	8.2	75.1963	5.59588	93.1942	4.8	64.288	5.77143	101.896				#DIV/0!	30.3	67.9816			8.2
-12.8	5.8	40.7343	5.69749	98.5853	9.4	49.3047	5.66388	98.7881	5.8	45.0512	5.60524	93.5159	4.8	43.3765	5.63968	91.8411	7.3	61.1859	5.63166	98.6812					-11.6	45.7044	5.6535	100.596	19.4	40.1384	5.71849	96.9988	8.3	76.321	5.59551	94.3189	4.9	65.0273	5.77047	102.635				#DIV/0!	30.4	72.939			8.3
-12.7	5.9	40.6218	5.69715	98.4728	9.5	49.8483	5.66273	99.3317	5.9	45.9394	5.60629	94.404	4.9	43.2344	5.63868	91.699	7.4	62.1695	5.6306	99.6648					-11.5	46.5865	5.65431	101.479	19.5	39.8184	5.71899	96.6788	8.4	76.7192	5.59404	94.7171	5	66.6541	5.76858	104.262				#DIV/0!	30.5	69.6798			8.4
-12.6	6	38.5073	5.69701	96.3583	9.6	50.2572	5.66108	99.7406	6	44.9198	5.60624	93.3844	5	44.3392	5.63795	92.8038	7.5	62.2859	5.63043	99.7812					-11.4	46.8189	5.65393	101.711	19.6	39.1792	5.71984	96.0396	8.5	75.7783	5.59272	93.7762	5.1	65.3006	5.76877	102.908				#DIV/0!	30.6	63.9881			8.5
-12.5	6.1	35.4175	5.69405	93.2685	9.7	49.6468	5.6597	99.1302	6.1	44.7451	5.60506	93.2097	5.1	44.106	5.63835	92.5707	7.6	62.2839	5.63016	99.7792					-11.3	46.7779	5.65379	101.67	19.7	38.8111	5.71997	95.6715	8.6	76.0231	5.59261	94.021	5.2	64.0316	5.77102	101.639				#DIV/0!	30.7	67.1262			8.6
-12.4	6.2	34.1083	5.69549	91.9593	9.8	49.9115	5.65922	99.3949	6.2	46.6822	5.60421	95.1469	5.2	44.1216	5.63895	92.5862	7.7	61.1293	5.62985	98.6246					-11.2	46.1552	5.65371	101.047	19.8	37.8682	5.72055	94.7286	8.7	75.944	5.59274	93.9419	5.3	64.1591	5.77182	101.767				#DIV/0!	30.8	70.7841			8.7
-12.3	6.3	36.7304	5.69536	94.5814	9.9	50.8	5.65899	100.283	6.3	46.6835	5.60539	95.1481	5.3	44.4019	5.63965	92.8665	7.8	59.6957	5.63083	97.191					-11.1	46.2861	5.65287	101.178	19.9	38.1765	5.71999	95.0369	8.8	75.9898	5.59293	93.9877	5.4	64.068	5.77223	101.676				#DIV/0!	30.9	69.9004			8.8
-12.2	6.4	41.6273	5.6918	99.4783	10	52.7638	5.65775	102.247	6.4	45.0847	5.60643	93.5493	5.4	43.904	5.63995	92.3687	7.9	60.414	5.63041	97.9093					-11	47.0495	5.65197	101.942	20	39.523	5.71909	96.3834	8.9	76.1658	5.5932	94.1637	5.5	64.9703	5.7726	102.578				#DIV/0!	31	68.3121			8.9
-12.1	6.5	41.1559	5.69422	99.0069	10.1	52.9242	5.65864	102.408	6.5	46.5218	5.60582	94.9864	5.5	44.3215	5.63975	92.7861	8	62.5869	5.62928	100.082					-10.9	46.9991	5.65189	101.891	20.1	40.5147	5.71983	97.3751	9	76.3463	5.59323	94.3442	5.6	64.9674	5.77147	102.575				#DIV/0!	31.1	69.8719			9
-12	6.6	38.3046	5.69696	96.1556	10.2	52.3073	5.65921	101.791	6.6	46.8895	5.60371	95.3541	5.6	45.009	5.63911	93.4736	8.1	63.5433	5.63032	101.039					-10.8	46.2124	5.65188	101.104	20.2	41.1752	5.7192	98.0356	9.1	76.6307	5.59346	94.6286	5.7	63.5965	5.77007	101.204				#DIV/0!	31.2	70.499			9.1
-11.9	6.7	37.1022	5.69629	94.9532	10.3	51.972	5.65914	101.455	6.7	46.0681	5.60174	94.5327	5.7	44.7621	5.63914	93.2267	8.2	63.6047	5.63016	101.1					-10.7	45.2154	5.6509	100.107	20.3	40.9105	5.71934	97.7709	9.2	77.3308	5.59335	95.3287	5.8	63.5106	5.77113	101.118				#DIV/0!	31.3	69.7103			9.2
-11.8	6.8	37.6075	5.69727	95.4585	10.4	50.1796	5.65948	99.663	6.8	46.521	5.60091	94.9856	5.8	45.5807	5.63945	94.0453	8.3	63.3913	5.63005	100.887					-10.6	45.801	5.65127	100.693	20.4	39.9806	5.7198	96.841	9.3	77.3169	5.59395	95.3148	5.9	65.2629	5.77231	102.871				#DIV/0!	31.4	70.7096			9.3
-11.7	6.9	41.965	5.69904	99.816	10.5	48.8244	5.65775	98.3078	6.9	46.1336	5.60047	94.5982	5.9	46.2034	5.64069	94.668	8.4	62.7569	5.63019	100.252					-10.5	46.7857	5.6524	101.678	20.5	39.9059	5.71913	96.7663	9.4	76.437	5.59445	94.4349	6	65.6491	5.77046	103.257				#DIV/0!	31.5	71.4467			9.4
-11.6	7	41.7293	5.69483	99.5803	10.6	49.3888	5.65784	98.8722	7	46.7958	5.60051	95.2604	6	46.1766	5.6411	94.6412	8.5	61.2207	5.62966	98.716					-10.4	46.4864	5.65218	101.378	20.6	40.7831	5.71863	97.6435	9.5	76.2785	5.59414	94.2764	6.1	65.4486	5.76879	103.056				#DIV/0!	31.6	70.8533			9.5
-11.5	7.1	38.3901	5.68978	96.2411	10.7	49.6205	5.65861	99.1039	7.1	47.4623	5.60128	95.9269	6.1	46.3545	5.64153	94.8191	8.6	59.1513	5.63087	96.6466					-10.3	46.6923	5.65156	101.584	20.7	41.2038	5.7192	98.0642	9.6	76.2199	5.59404	94.2178	6.2	66.1954	5.76782	103.803				#DIV/0!	31.7	70.1361			9.6
-11.4	7.2	40.0708	5.68969	97.9218	10.8	49.3599	5.65901	98.8433	7.2	48.0215	5.60122	96.4861	6.2	46.3043	5.64171	94.7689	8.7	59.5584	5.63003	97.0537					-10.2	47.6675	5.65077	102.56	20.8	41.3744	5.71915	98.2348	9.7	77.1218	5.59387	95.1197	6.3	67.4956	5.76779	105.103				#DIV/0!	31.8	69.8359			9.7
-11.3	7.3	40.2294	5.69176	98.0804	10.9	49.6036	5.65915	99.087	7.3	48.5676	5.60178	97.0322	6.3	46.1784	5.64186	94.643	8.8	60.9844	5.62887	98.4797					-10.1	47.5241	5.65107	102.416	20.9	41.3948	5.71933	98.2552	9.8	77.6688	5.59279	95.6667	6.4	68.93	5.76574	106.538				#DIV/0!	31.9	68.5447			9.8
-11.2	7.4	37.9335	5.69338	95.7845	11	49.0109	5.65899	98.4943	7.4	47.9052	5.60167	96.3698	6.4	45.5614	5.64213	94.026	8.9	61.0048	5.62908	98.5001					-10	46.9287	5.6515	101.821	21	40.4294	5.71945	97.2898	9.9	76.8673	5.59208	94.8652	6.5	67.8735	5.76543	105.481				#DIV/0!	32	67.8313			9.9
-11.1	7.5	39.51	5.6922	97.361	11.1	48.8343	5.6581	98.3177	7.5	46.6215	5.60082	95.0861	6.5	45.2175	5.64175	93.6821	9	61.1208	5.62923	98.6161					-9.9	47.2398	5.65126	102.132	21.1	40.5812	5.71835	97.4416	10	76.3855	5.59233	94.3834	6.6	66.5703	5.76682	104.178				#DIV/0!	32.1	66.8445			10
-11	7.6	41.6536	5.68909	99.5046	11.2	49.8564	5.65755	99.3398	7.6	46.4559	5.60147	94.9205	6.6	45.8061	5.64179	94.2707	9.1	61.7686	5.62954	99.2639					-9.8	48.0461	5.65068	102.938	21.2	40.9535	5.71718	97.8139	10.1	75.7223	5.59213	93.7202	6.7	67.7645	5.76652	105.372				#DIV/0!	32.2	64.5343			10.1
-10.9	7.7	40.4576	5.6884	98.3086	11.3	50.0677	5.65811	99.5511	7.7	46.5055	5.60202	94.9701	6.7	47.2204	5.64249	95.685	9.2	60.7957	5.6291	98.291					-9.7	48.2689	5.65099	103.161	21.3	41.0916	5.71636	97.952	10.2	76.2536	5.59265	94.2515	6.8	68.9578	5.76446	106.565				#DIV/0!	32.3	65.1071			10.2
-10.8	7.8	41.9016	5.68933	99.7526	11.4	49.8397	5.65835	99.3231	7.8	45.8311	5.60246	94.2957	6.8	47.7967	5.64154	96.2613	9.3	59.6013	5.62755	97.0966					-9.6	47.6496	5.651	102.542	21.4	41.6362	5.71545	98.4966	10.3	77.0299	5.59382	95.0278	6.9	68.8568	5.76372	106.464				#DIV/0!	32.4	65.7374			10.3
-10.7	7.9	43.6936	5.69225	101.545	11.5	49.9827	5.65836	99.4661	7.9	45.8581	5.6022	94.3227	6.9	46.2152	5.64112	94.6798	9.4	60.1396	5.62751	97.6349					-9.5	47.9387	5.65025	102.831	21.5	42.0611	5.71513	98.9215	10.4	76.695	5.59397	94.6929	7	68.9145	5.76333	106.522				#DIV/0!	32.5	65.0904			10.4
-10.6	8	43.5238	5.69247	101.375	11.6	50.3466	5.6582	99.83	8	45.2636	5.60195	93.7282	7	45.2629	5.64249	93.7275	9.5	61.0288	5.62805	98.5241					-9.4	48.0296	5.64924	102.922	21.6	43.2609	5.71431	100.121	10.5	77.1364	5.59379	95.1343	7.1	68.6373	5.76293	106.245				#DIV/0!	32.6	65.4576			10.5
-10.5	8.1	43.64	5.69249	101.491	11.7	50.8689	5.65845	100.352	8.1	44.7456	5.60101	93.2103	7.1	46.606	5.64297	95.0707	9.6	61.6498	5.62755	99.1451					-9.3	47.0852	5.64822	101.977	21.7	43.2848	5.71492	100.145	10.6	76.554	5.59319	94.5519	7.2	69.0721	5.76305	106.68				#DIV/0!	32.7	66.1186			10.6
-10.4	8.2	43.5052	5.69236	101.356	11.8	50.0034	5.65805	99.4868	8.2	45.9063	5.60075	94.3709	7.2	48.5995	5.6419	97.0641	9.7	61.0395	5.62764	98.5348					-9.2	46.9968	5.64847	101.889	21.8	42.3738	5.71541	99.2342	10.7	75.5677	5.59188	93.5656	7.3	68.7617	5.76386	106.369				#DIV/0!	32.8	66.3302			10.7
-10.3	8.3	43.197	5.69203	101.048	11.9	49.6657	5.65658	99.1491	8.3	47.4288	5.60172	95.8935	7.3	48.4686	5.64291	96.9332	9.8	60.8802	5.62837	98.3755					-9.1	47.5521	5.64864	102.444	21.9	41.4847	5.71481	98.3451	10.8	76.7239	5.59182	94.7218	7.4	67.8876	5.76496	105.495				#DIV/0!	32.9	66.8425			10.8
-10.2	8.4	41.6047	5.69215	99.4557	12	50.3938	5.6557	99.8772	8.4	47.2142	5.60091	95.6788	7.4	47.6858	5.64394	96.1504	9.9	61.0754	5.62904	98.5707					-9	46.9899	5.64813	101.882	22	41.3043	5.71542	98.1647	10.9	78.2947	5.59295	96.2926	7.5	67.2603	5.76498	104.868				#DIV/0!	33	67.1833			10.9
-10.1	8.5	40.2841	5.69021	98.1351	12.1	50.242	5.65556	99.7254	8.5	45.9987	5.59977	94.4633	7.5	48.521	5.64423	96.9856	10	60.1859	5.6294	97.6812					-8.9	45.4209	5.64686	100.313	22.1	41.4299	5.71586	98.2903	11	77.6609	5.59224	95.6588	7.6	66.0355	5.76596	103.643				#DIV/0!	33.1	68.4295			11
-10	8.6	41.2106	5.69022	99.0616	12.2	49.5672	5.65561	99.0506	8.6	46.2974	5.6001	94.762	7.6	48.396	5.64356	96.8606	10.1	60.8326	5.62886	98.3279					-8.8	44.568	5.64765	99.4601	22.2	40.9927	5.7161	97.8531	11.1	76.7938	5.59075	94.7917	7.7	66.1601	5.76528	103.768				#DIV/0!	33.2	69.7885			11.1
-9.9	8.7	42.4433	5.69144	100.294	12.3	49.7202	5.65488	99.2036	8.7	47.2313	5.60078	95.6959	7.7	47.5989	5.64267	96.0635	10.2	61.3245	5.6277	98.8198					-8.7	45.3744	5.64751	100.266	22.3	40.0668	5.7158	96.9272	11.2	78.4562	5.59042	96.4541	7.8	66.7787	5.76456	104.386				#DIV/0!	33.3	70.9573			11.2
-9.8	8.8	42.9823	5.69091	100.833	12.4	50.3002	5.65407	99.7836	8.8	46.461	5.60037	94.9256	7.8	48.6086	5.64277	97.0733	10.3	61.2752	5.6269	98.7705					-8.6	46.2657	5.64641	101.158	22.4	40.0876	5.71671	96.948	11.3	79.0807	5.59175	97.0786	7.9	66.9068	5.76464	104.514				#DIV/0!	33.4	72.2535			11.3
-9.7	8.9	43.5521	5.691	101.403	12.5	48.9019	5.65383	98.3853	8.9	44.8605	5.59907	93.3251	7.9	49.324	5.64399	97.7886	10.4	61.6889	5.62628	99.1842					-8.5	46.4512	5.64625	101.343	22.5	41.2679	5.71777	98.1283	11.4	78.4728	5.59219	96.4707	8	66.9647	5.7645	104.572				#DIV/0!	33.5	74.7974			11.4
-9.6	9	44.026	5.69035	101.877	12.6	48.4215	5.65525	97.9049	9	45.0474	5.59966	93.512	8	48.6929	5.64427	97.1575	10.5	60.6952	5.626	98.1905					-8.4	47.2218	5.64589	102.114	22.6	41.2962	5.71718	98.1566	11.5	78.4978	5.59208	96.4957	8.1	65.6432	5.76442	103.251				#DIV/0!	33.6	77.4736			11.5
-9.5	9.1	43.5899	5.69022	101.441	12.7	49.0721	5.65629	98.5555	9.1	46.0542	5.60051	94.5188	8.1	48.507	5.64389	96.9716	10.6	59.4573	5.62682	96.9526					-8.3	47.3699	5.64641	102.262	22.7	40.0875	5.71656	96.9479	11.6	78.5253	5.59196	96.5232	8.2	64.1719	5.76639	101.78				#DIV/0!	33.7	79.5305			11.6
-9.4	9.2	41.4405	5.69067	99.2915	12.8	49.4145	5.65643	98.8979	9.2	45.9677	5.60018	94.4323	8.2	48.4148	5.64376	96.8794	10.7	59.4067	5.62644	96.902					-8.2	46.8099	5.64668	101.702	22.8	39.3542	5.71756	96.2146	11.7	77.7299	5.59185	95.7278	8.3	64.7484	5.76654	102.356				#DIV/0!	33.8	80.6896			11.7
-9.3	9.3	39.9833	5.6884	97.8343	12.9	50.4987	5.65699	99.9821	9.3	45.7947	5.59971	94.2593	8.3	49.2267	5.6435	97.6913	10.8	60.8349	5.62617	98.3302					-8.1	46.3265	5.64632	101.219	22.9	39.3808	5.71774	96.2412	11.8	77.9243	5.59258	95.9222	8.4	64.8828	5.76577	102.49				#DIV/0!	33.9	80.3152			11.8
-9.2	9.4	38.3817	5.68828	96.2327	13	49.7702	5.65622	99.2536	9.4	45.7389	5.59949	94.2035	8.4	50.5229	5.64238	98.9875	10.9	63.2917	5.62739	100.787					-8	45.3924	5.64658	100.284	23	39.52	5.71787	96.3804	11.9	78.7658	5.59365	96.7637	8.5	64.167	5.76503	101.775				#DIV/0!	34	80.8024			11.9
-9.1	9.5	36.8558	5.68609	94.7068	13.1	48.833	5.65448	98.3164	9.5	45.2422	5.59917	93.7068	8.5	49.3636	5.64256	97.8282	11	64.2892	5.6258	101.785					-7.9	44.6703	5.64576	99.5624	23.1	40.1953	5.71819	97.0557	12	79.7996	5.59365	97.7975	8.6	64.5337	5.76556	102.141				#DIV/0!	34.1	79.1316			12
-9	9.6	38.656	5.6861	96.507	13.2	49.7132	5.65407	99.1966	9.6	46.4904	5.59943	94.955	8.6	47.717	5.64399	96.1816	11.1	63.3195	5.62503	100.815					-7.8	44.2176	5.6459	99.1097	23.2	40.7791	5.7176	97.6395	12.1	80.2663	5.59472	98.2642	8.7	65.3516	5.76678	102.959				#DIV/0!	34.2	78.2111			12.1
-8.9	9.7	41.2733	5.68844	99.1243	13.3	49.8225	5.65462	99.3059	9.7	47.773	5.60108	96.2377	8.7	47.5447	5.64377	96.0093	11.2	61.7149	5.62541	99.2102					-7.7	44.3475	5.64552	99.2396	23.3	39.9399	5.71769	96.8003	12.2	79.9039	5.5951	97.9018	8.8	65.0027	5.76645	102.61				#DIV/0!	34.3	75.5973			12.2
-8.8	9.8	43.2874	5.68712	101.138	13.4	49.4337	5.65498	98.9171	9.8	46.5421	5.60114	95.0067	8.8	47.4777	5.64378	95.9423	11.3	61.7338	5.62413	99.2291					-7.6	45.3483	5.64503	100.24	23.4	39.7203	5.71885	96.5807	12.3	79.4198	5.59518	97.4177	8.9	64.86	5.76551	102.468				#DIV/0!	34.4	73.4771			12.3
-8.7	9.9	43.7707	5.68824	101.622	13.5	50.1198	5.65493	99.6032	9.9	46.4985	5.59985	94.9631	8.9	47.7342	5.64371	96.1988	11.4	64.2784	5.62303	101.774					-7.5	45.9621	5.64568	100.854	23.5	41.3378	5.71986	98.1982	12.4	78.1632	5.59574	96.1611	9	65.571	5.76501	103.179				#DIV/0!	34.5	71.6505			12.4
-8.6	10	43.5962	5.68858	101.447	13.6	49.9674	5.65409	99.4508	10	47.6306	5.59877	96.0952	9	47.7264	5.64336	96.191	11.5	64.9452	5.62446	102.441					-7.4	46.1343	5.64551	101.026	23.6	41.4347	5.71867	98.2951	12.5	77.5362	5.5951	95.5341	9.1	65.0868	5.76549	102.694				#DIV/0!	34.6	68.7528			12.5
-8.5	10.1	43.4288	5.68875	101.28	13.7	48.9917	5.65295	98.4751	10.1	48.2487	5.59879	96.7133	9.1	47.0059	5.64296	95.4705	11.6	64.7674	5.62495	102.263					-7.3	46.106	5.64552	100.998	23.7	40.6705	5.71746	97.5309	12.6	76.8577	5.59523	94.8556	9.2	63.9207	5.7666	101.528				#DIV/0!	34.7	68.6805			12.6
-8.4	10.2	41.7958	5.68912	99.6468	13.8	49.4077	5.6531	98.8911	10.2	48.2535	5.59813	96.7181	9.2	47.2938	5.64341	95.7584	11.7	64.3302	5.62533	101.826					-7.2	46.5402	5.64557	101.432	23.8	40.5265	5.71737	97.3869	12.7	76.8123	5.59469	94.8102	9.3	63.123	5.76617	100.731				#DIV/0!	34.8	67.2022			12.7
-8.3	10.3	41.0735	5.68742	98.9245	13.9	49.8716	5.65376	99.355	10.3	47.6205	5.59741	96.0851	9.3	48.4143	5.64423	96.8789	11.8	62.2177	5.62612	99.713					-7.1	47.5151	5.64614	102.407	23.9	41.0887	5.7171	97.9491	12.8	76.8986	5.59429	94.8965	9.4	63.1642	5.76707	100.772				#DIV/0!	34.9	68.3748			12.8
-8.2	10.4	41.8787	5.68686	99.7297	14	48.9945	5.65379	98.4779	10.4	46.4129	5.59745	94.8775	9.4	48.1709	5.64371	96.6355	11.9	61.0694	5.62478	98.5647					-7	48.3404	5.64547	103.232	24	42.0822	5.71613	98.9426	12.9	77.4585	5.5939	95.4564	9.5	64.2228	5.76824	101.83				#DIV/0!	35	71.1707			12.9
-8.1	10.5	42.9916	5.68727	100.843	14.1	48.4405	5.6528	97.9239	10.5	45.0664	5.59619	93.531	9.5	47.6073	5.64286	96.0719	12	60.778	5.62487	98.2733					-6.9	48.102	5.6457	102.994	24.1	42.9177	5.71632	99.7781	13	79.2845	5.59301	97.2824	9.6	64.7522	5.7675	102.36				#DIV/0!	35.1	71.8312			13
-8	10.6	43.908	5.68619	101.759	14.2	48.5001	5.65259	97.9835	10.6	45.2582	5.59653	93.7228	9.6	47.4636	5.64274	95.9282	12.1	60.989	5.62465	98.4843					-6.8	47.7901	5.64618	102.682	24.2	43.2319	5.71541	100.092	13.1	80.8082	5.59384	98.8061	9.7	64.1014	5.76742	101.709				#DIV/0!	35.2	70.8761			13.1
-7.9	10.7	43.5145	5.68616	101.366	14.3	48.9224	5.65242	98.4058	10.7	45.5425	5.59712	94.0071	9.7	47.1604	5.64244	95.625	12.2	60.5011	5.62425	97.9964					-6.7	47.1572	5.64636	102.049	24.3	41.7223	5.71479	98.5827	13.2	80.7214	5.59293	98.7193	9.8	62.926	5.76836	100.534				#DIV/0!	35.3	71.3259			13.2
-7.8	10.8	41.8722	5.68664	99.7232	14.4	49.803	5.65178	99.2864	10.8	46.316	5.59733	94.7806	9.8	47.7906	5.64251	96.2552	12.3	60.8216	5.62327	98.3169					-6.6	46.2841	5.64728	101.176	24.4	40.3446	5.71618	97.205	13.3	80.6579	5.59176	98.6558	9.9	62.9331	5.7677	100.541				#DIV/0!	35.4	73.234			13.3
-7.7	10.9	42.776	5.68507	100.627	14.5	49.6667	5.65208	99.1501	10.9	46.3466	5.5984	94.8113	9.9	48.972	5.64329	97.4366	12.4	62.7716	5.62209	100.267					-6.5	47.2236	5.64726	102.116	24.5	40.226	5.71597	97.0864	13.4	80.5522	5.59088	98.5501	10	62.9088	5.76717	100.516				#DIV/0!	35.5	75.2074			13.4
-7.6	11	46.0149	5.68253	103.866	14.6	49.4415	5.65249	98.9249	11	44.5011	5.59932	92.9657	10	48.6988	5.64266	97.1634	12.5	62.289	5.62279	99.7843					-6.4	47.8783	5.64611	102.77	24.6	40.2037	5.71594	97.0641	13.5	80.6289	5.58971	98.6268	10.1	62.6399	5.76649	100.248				#DIV/0!	35.6	76.4861			13.5
-7.5	11.1	44.0601	5.6838	101.911	14.7	49.684	5.6527	99.1674	11.1	44.1913	5.59834	92.6559	10.1	48.1111	5.64165	96.5757	12.6	61.145	5.6239	98.6403					-6.3	48.1623	5.6456	103.054	24.7	41.5921	5.71587	98.4525	13.6	80.8456	5.58869	98.8435	10.2	63.7002	5.76638	101.308				#DIV/0!	35.7	75.583			13.6
-7.4	11.2	41.2146	5.6874	99.0656	14.8	48.6465	5.65261	98.1299	11.2	44.8781	5.5978	93.3427	10.2	48.1369	5.64142	96.6015	12.7	61.7949	5.62396	99.2902					-6.2	48.3875	5.64482	103.28	24.8	43.6514	5.71405	100.512	13.7	79.2421	5.5877	97.24	10.3	63.7333	5.76788	101.341				#DIV/0!	35.8	76.3633			13.7
-7.3	11.3	43.6473	5.6878	101.498	14.9	46.7857	5.6513	96.2691	11.3	43.5729	5.59794	92.0375	10.3	48.3974	5.64119	96.862	12.8	62.1253	5.62332	99.6206					-6.1	47.5095	5.6442	102.402	24.9	43.7616	5.71461	100.622	13.8	77.7686	5.58854	95.7665	10.4	62.2133	5.76899	99.821				#DIV/0!	35.9	76.2642			13.8
-7.2	11.4	44.7319	5.68501	102.583	15	45.5963	5.6523	95.0797	11.4	43.0689	5.59949	91.5335	10.4	49.2566	5.6407	97.7212	12.9	61.5189	5.62294	99.0142					-6	46.668	5.64472	101.56	25	43.5646	5.71497	100.425	13.9	77.0237	5.58803	95.0216	10.5	62.7064	5.76799	100.314				#DIV/0!	36	75.6555			13.9
-7.1	11.5	45.3608	5.68325	103.212	15.1	46.6587	5.65206	96.1421	11.5	44.4607	5.60065	92.9253	10.5	49.3642	5.64109	97.8288	13	61.4306	5.62325	98.9259					-5.9	47.0159	5.64429	101.908	25.1	42.3113	5.71512	99.1717	14	77.7135	5.58837	95.7114	10.6	64.3135	5.76644	101.921				#DIV/0!	36.1	74.5485			14
-7	11.6	45.5162	5.68092	103.367	15.2	48.0857	5.65061	97.5691	11.6	45.231	5.60017	93.6957	10.6	48.5201	5.64131	96.9847	13.1	62.3914	5.62352	99.8867					-5.8	48.0754	5.6435	102.967	25.2	40.5182	5.71685	97.3786	14.1	78.2393	5.58949	96.2372	10.7	65.08	5.76703	102.688				#DIV/0!	36.2	72.5175			14.1
-6.9	11.7	41.2494	5.67848	99.1004	15.3	47.2335	5.65064	96.7169	11.7	44.8989	5.60048	93.3635	10.7	48.3946	5.64064	96.8592	13.2	63.2518	5.62273	100.747					-5.7	48.1464	5.64388	103.038	25.3	41.2426	5.7165	98.103	14.2	78.7898	5.58986	96.7877	10.8	65.6048	5.7663	103.212				#DIV/0!	36.3	71.1773			14.2
-6.8	11.8	39.8638	5.68175	97.7148	15.4	46.6397	5.65164	96.1231	11.8	44.8406	5.60111	93.3053	10.8	48.9231	5.64018	97.3877	13.3	62.8434	5.62273	100.339					-5.6	47.1561	5.64412	102.048	25.4	42.3638	5.71526	99.2242	14.3	79.3544	5.59086	97.3523	10.9	65.2602	5.76621	102.868				#DIV/0!	36.4	69.9188			14.3
-6.7	11.9	42.9775	5.68365	100.829	15.5	46.8722	5.65208	96.3556	11.9	46.0927	5.60176	94.5573	10.9	49.6604	5.64025	98.125	13.4	61.6284	5.62316	99.1237					-5.5	46.6789	5.64321	101.571	25.5	43.7787	5.7153	100.639	14.4	78.3277	5.59109	96.3256	11	64.9597	5.76668	102.567				#DIV/0!	36.5	69.5342			14.4
-6.6	12	45.9517	5.68135	103.803	15.6	46.6498	5.6522	96.1332	12	46.1275	5.60096	94.5921	11	49.8781	5.6395	98.3427	13.5	60.7814	5.62237	98.2767					-5.4	46.8902	5.64299	101.782	25.6	44.5278	5.71354	101.388	14.5	77.4123	5.59031	95.4102	11.1	65.1547	5.76679	102.762				#DIV/0!	36.6	70.2416			14.5
-6.5	12.1	46.5975	5.68253	104.449	15.7	47.3069	5.65208	96.7903	12.1	44.2307	5.60011	92.6953	11.1	49.3001	5.63889	97.7647	13.6	60.4855	5.6226	97.9808					-5.3	46.3823	5.64299	101.274	25.7	43.9088	5.7125	100.769	14.6	77.8997	5.59061	95.8976	11.2	64.4176	5.76657	102.025				#DIV/0!	36.7	70.8041			14.6
-6.4	12.2	44.8608	5.68274	102.712	15.8	48.9097	5.65121	98.3931	12.2	43.0669	5.60142	91.5315	11.2	48.9244	5.639	97.389	13.7	61.231	5.62255	98.7263					-5.2	46.1372	5.6436	101.029	25.8	43.4804	5.71238	100.341	14.7	79.0861	5.59147	97.084	11.3	63.8676	5.76517	101.475				#DIV/0!	36.8	69.778			14.7
-6.3	12.3	42.0391	5.68075	99.8901	15.9	49.0307	5.65208	98.5141	12.3	44.1838	5.60161	92.6484	11.3	50.1716	5.6387	98.6362	13.8	63.1394	5.62171	100.635					-5.1	46.0244	5.64399	100.916	25.9	42.9096	5.7117	99.77	14.8	79.052	5.59095	97.0499	11.4	64.5352	5.76493	102.143				#DIV/0!	36.9	69.3304			14.8
-6.2	12.4	40.5315	5.68262	98.3825	16	47.5574	5.6527	97.0408	12.4	45.3309	5.60055	93.7955	11.4	50.8322	5.63708	99.2968	13.9	64.3324	5.62277	101.828					-5	44.9924	5.64447	99.8845	26	43.0783	5.71183	99.9387	14.9	79.2411	5.5903	97.239	11.5	65.2793	5.76567	102.887				#DIV/0!	37	70.0239			14.9
-6.1	12.5	41.2691	5.68278	99.1201	16.1	47.8576	5.65169	97.341	12.5	45.1227	5.60063	93.5873	11.5	50.0698	5.63597	98.5344	14	63.8047	5.62241	101.3					-4.9	45.2356	5.64377	100.128	26.1	43.1043	5.71219	99.9647	15	79.4392	5.58957	97.4371	11.6	65.35	5.76509	102.958				#DIV/0!	37.1	70.8196			15
-6	12.6	41.572	5.68199	99.423	16.2	49.6032	5.65047	99.0866	12.6	43.7135	5.60093	92.1781	11.6	50.4861	5.63583	98.9507	14.1	62.63	5.62143	100.125					-4.8	45.6073	5.64287	100.499	26.2	43.3339	5.71248	100.194	15.1	79.6476	5.5889	97.6455	11.7	64.725	5.76449	102.333				#DIV/0!	37.2	70.8404			15.1
-5.9	12.7	42.3173	5.68149	100.168	16.3	50.0525	5.6511	99.5359	12.7	43.1324	5.59972	91.597	11.7	50.8458	5.63613	99.3104	14.2	61.7069	5.62184	99.2022					-4.7	43.8945	5.64229	98.7866	26.3	43.9896	5.71309	100.85	15.2	80.3446	5.58815	98.3425	11.8	64.4755	5.76499	102.083				#DIV/0!	37.3	70.4444			15.2
-5.8	12.8	43.0762	5.6801	100.927	16.4	49.8653	5.65113	99.3487	12.8	44.3195	5.59928	92.7841	11.8	50.5685	5.636	99.0331	14.3	62.6249	5.62134	100.12					-4.6	43.9619	5.64384	98.854	26.4	44.3261	5.71278	101.187	15.3	79.0528	5.58797	97.0507	11.9	63.8836	5.76522	101.491				#DIV/0!	37.4	69.4148			15.3
-5.7	12.9	41.6306	5.6795	99.4816	16.5	49.9298	5.65095	99.4132	12.9	46.3551	5.60008	94.8197	11.9	50.6155	5.63555	99.0801	14.4	64.0865	5.61994	101.582					-4.5	45.8971	5.64565	100.789	26.5	43.9029	5.71287	100.763	15.4	79.0269	5.58915	97.0248	12	63.0642	5.76631	100.672				#DIV/0!	37.5	67.4269			15.4
-5.6	13	40.6031	5.68081	98.4541	16.6	50.5619	5.65072	100.045	13	47.1173	5.59857	95.5819	12	51.6934	5.6351	100.158	14.5	63.1813	5.61987	100.677					-4.4	45.7039	5.64491	100.596	26.6	43.9354	5.71348	100.796	15.5	79.812	5.59052	97.8099	12.1	63.6654	5.76639	101.273				#DIV/0!	37.6	66.1546			15.5
-5.5	13.1	41.2292	5.68097	99.0802	16.7	50.5434	5.65119	100.027	13.1	46.3735	5.59772	94.8381	12.1	52.9637	5.63577	101.428	14.6	62.3304	5.62077	99.8257					-4.3	45.3167	5.64385	100.209	26.7	43.7385	5.71421	100.599	15.6	78.3514	5.59083	96.3493	12.2	64.0734	5.76551	101.681				#DIV/0!	37.7	66.4664			15.6
-5.4	13.2	42.4232	5.68031	100.274	16.8	49.8055	5.65162	99.2889	13.2	46.4389	5.59777	94.9035	12.2	52.7213	5.63497	101.186	14.7	62.6453	5.6209	100.141					-4.2	44.917	5.64339	99.8091	26.8	42.3794	5.7151	99.2398	15.7	78.598	5.58968	96.5959	12.3	64.1521	5.76507	101.76				#DIV/0!	37.8	65.96			15.7
-5.3	13.3	43.2792	5.68109	101.13	16.9	49.5393	5.65125	99.0227	13.3	46.1114	5.5979	94.576	12.3	52.7782	5.6338	101.243	14.8	62.8327	5.62068	100.328					-4.1	44.4998	5.64239	99.3919	26.9	41.6185	5.71437	98.4789	15.8	80.3873	5.5885	98.3852	12.4	64.15	5.7646	101.758				#DIV/0!	37.9	65.8272			15.8
-5.2	13.4	43.3942	5.68069	101.245	17	48.2242	5.65124	97.7076	13.4	45.0638	5.59837	93.5284	12.4	52.6772	5.63272	101.142	14.9	62.6412	5.62062	100.137					-4	45.296	5.64201	100.188	27	41.4134	5.7147	98.2738	15.9	80.1988	5.58892	98.1967	12.5	63.3118	5.76403	100.919				#DIV/0!	38	67.8171			15.9
-5.1	13.5	42.7514	5.68038	100.602	17.1	47.786	5.64971	97.2694	13.5	44.1681	5.59776	92.6327	12.5	51.4109	5.63139	99.8755	15	61.837	5.62077	99.3323					-3.9	46.5602	5.64254	101.452	27.1	42.3522	5.71481	99.2126	16	79.8935	5.58946	97.8914	12.6	62.9784	5.76487	100.586				#DIV/0!	38.1	68.3093			16
-5	13.6	42.1568	5.68093	100.008	17.2	49.3417	5.64887	98.8251	13.6	43.6971	5.59819	92.1617	12.6	50.8691	5.6316	99.3337	15.1	61.5706	5.6201	99.0659					-3.8	46.7606	5.64149	101.653	27.2	43.2544	5.71371	100.115	16.1	79.4363	5.58979	97.4342	12.7	63.3231	5.76539	100.931				#DIV/0!	38.2	67.8942			16.1
-4.9	13.7	42.4838	5.68078	100.335	17.3	49.1121	5.64972	98.5955	13.7	42.859	5.59816	91.3236	12.7	51.4361	5.63125	99.9007	15.2	62.6727	5.61981	100.168					-3.7	45.5104	5.64054	100.402	27.3	43.3127	5.71362	100.173	16.2	78.9119	5.59052	96.9098	12.8	63.989	5.76527	101.597				#DIV/0!	38.3	67.8838			16.2
-4.8	13.8	43.2056	5.68024	101.057	17.4	48.1523	5.65072	97.6357	13.8	42.9493	5.59904	91.4139	12.8	52.6748	5.63034	101.139	15.3	62.1686	5.62063	99.6639					-3.6	44.4225	5.64121	99.3146	27.4	43.3762	5.71347	100.237	16.3	80.2844	5.59086	98.2823	12.9	63.7968	5.76614	101.404				#DIV/0!	38.4	66.8754			16.3
-4.7	13.9	42.5093	5.68055	100.36	17.5	48.4705	5.65075	97.9539	13.9	44.9854	5.60011	93.45	12.9	52.2274	5.63064	100.692	15.4	60.9714	5.62185	98.4667					-3.5	44.7551	5.64066	99.6472	27.5	43.1115	5.71338	99.9719	16.4	80.7323	5.58971	98.7302	13	62.506	5.76712	100.114				#DIV/0!	38.5	66.6616			16.4
-4.6	14	41.0055	5.6817	98.8565	17.6	48.5027	5.6504	97.9861	14	45.2608	5.59885	93.7254	13	51.1335	5.63138	99.5981	15.5	61.6474	5.622	99.1427					-3.4	45.4116	5.63978	100.304	27.6	42.7652	5.71363	99.6256	16.5	80.1964	5.58881	98.1943	13.1	62.0576	5.76631	99.6653				#DIV/0!	38.6	66.5914			16.5
-4.5	14.1	40.347	5.68108	98.198	17.7	48.2797	5.65004	97.7631	14.1	43.5345	5.59775	91.9991	13.1	51.5898	5.63104	100.054	15.6	62.2243	5.62141	99.7196					-3.3	44.939	5.63957	99.8311	27.7	42.0309	5.71348	98.8913	16.6	81.2985	5.58863	99.2964	13.2	61.7649	5.76638	99.3726				#DIV/0!	38.7	67.8795			16.6
-4.4	14.2	41.7071	5.68137	99.5581	17.8	48.9497	5.64999	98.4331	14.2	42.2162	5.59864	90.6808	13.2	52.2024	5.63025	100.667	15.7	61.8794	5.62134	99.3747					-3.2	45.0233	5.63995	99.9154	27.8	41.0923	5.71428	97.9527	16.7	82.5829	5.58955	100.581	13.3	61.3225	5.76601	98.9302				#DIV/0!	38.8	70.4701			16.7
-4.3	14.3	43.9616	5.68343	101.813	17.9	50.2305	5.6507	99.7139	14.3	42.7768	5.5982	91.2414	13.3	51.6426	5.63002	100.107	15.8	61.9744	5.62165	99.4697					-3.1	45.4987	5.64047	100.391	27.9	41.0745	5.71398	97.9349	16.8	81.6786	5.58897	99.6765	13.4	61.3829	5.7664	98.9906				#DIV/0!	38.9	71.0472			16.8
-4.2	14.4	43.9429	5.68236	101.794	18	50.5886	5.64984	100.072	14.4	43.7829	5.59719	92.2475	13.4	51.0065	5.63042	99.4711	15.9	62.1213	5.6221	99.6166					-3	44.87	5.64037	99.7621	28	41.3179	5.71374	98.1783	16.9	80.4695	5.58735	98.4674	13.5	61.6855	5.76697	99.2932				#DIV/0!	39	70.2271			16.9
-4.1	14.5	42.4775	5.68112	100.329	18.1	50.1063	5.64928	99.5897	14.5	42.5564	5.59717	91.021	13.5	50.6888	5.63018	99.1534	16	60.8654	5.62233	98.3607					-2.9	43.911	5.63951	98.8031	28.1	42.0555	5.71379	98.9159	17	81.079	5.58728	99.0769	13.6	62.1617	5.76695	99.7694				#DIV/0!	39.1	68.8607			17
-4	14.6	42.2897	5.6819	100.141	18.2	50.7141	5.64935	100.198	14.6	42.8851	5.59848	91.3498	13.6	52.4109	5.63031	100.876	16.1	61.6177	5.62126	99.113					-2.8	44.2012	5.63988	99.0933	28.2	42.7543	5.71288	99.6147	17.1	81.6246	5.58782	99.6225	13.7	62.7151	5.76766	100.323				#DIV/0!	39.2	67.4642			17.1
-3.9	14.7	43.1852	5.68255	101.036	18.3	51.4542	5.65013	100.938	14.7	43.7377	5.60028	92.2023	13.7	53.7927	5.63232	102.257	16.2	62.2536	5.61957	99.7489					-2.7	44.7786	5.64065	99.6707	28.3	42.833	5.71276	99.6934	17.2	81.0034	5.5877	99.0013	13.8	62.4846	5.76736	100.092				#DIV/0!	39.3	66.9206			17.2
-3.8	14.8	43.0138	5.68197	100.865	18.4	50.8059	5.64995	100.289	14.8	42.0237	5.60096	90.4883	13.8	51.9073	5.63257	100.372	16.3	61.9855	5.61828	99.4808					-2.6	44.2935	5.64064	99.1856	28.4	43.0301	5.71255	99.8905	17.3	81.3052	5.58692	99.3031	13.9	62.8546	5.76663	100.462				#DIV/0!	39.4	66.3799			17.3
-3.7	14.9	42.412	5.6811	100.263	18.5	50.0081	5.649	99.4915	14.9	42.1098	5.59984	90.5744	13.9	50.5687	5.63082	99.0333	16.4	63.0081	5.61747	100.503					-2.5	43.7216	5.64005	98.6137	28.5	43.2873	5.71257	100.148	17.4	81.8339	5.58598	99.8318	14	63.1995	5.76549	100.807				#DIV/0!	39.5	66.2672			17.4
-3.6	15	41.5322	5.68111	99.3832	18.6	49.674	5.64909	99.1574	15	43.6971	5.59875	92.1617	14	51.1926	5.63073	99.6572	16.5	62.8165	5.6176	100.312					-2.4	43.7052	5.64021	98.5973	28.6	43.2834	5.71226	100.144	17.5	81.414	5.5854	99.4119	14.1	62.0439	5.76463	99.6516				#DIV/0!	39.6	66.3412			17.5
-3.5	15.1	40.6148	5.68	98.4658	18.7	49.1884	5.64881	98.6718	15.1	44.4431	5.59927	92.9077	14.1	51.3506	5.63131	99.8152	16.6	62.7005	5.61792	100.196					-2.3	44.4654	5.64038	99.3575	28.7	43.4959	5.7119	100.356	17.6	81.9392	5.58536	99.9371	14.2	61.1392	5.76574	98.7469				#DIV/0!	39.7	65.6419			17.6
-3.4	15.2	41.3307	5.68019	99.1817	18.8	49.1113	5.64913	98.5947	15.2	43.8824	5.59892	92.347	14.2	50.7813	5.63164	99.2459	16.7	62.4742	5.61816	99.9695					-2.2	45.5071	5.63962	100.399	28.8	43.6076	5.71132	100.468	17.7	82.8111	5.58585	100.809	14.3	60.7916	5.7657	98.3993				#DIV/0!	39.8	63.6959			17.7
-3.3	15.3	42.2647	5.68131	100.116	18.9	49.9917	5.6494	99.4751	15.3	43.4609	5.59792	91.9255	14.3	51.285	5.6314	99.7496	16.8	62.0369	5.6186	99.5322					-2.1	45.8372	5.64	100.729	28.9	43.3617	5.7108	100.222	17.8	82.5187	5.58536	100.517	14.4	60.6756	5.7662	98.2833				#DIV/0!	39.9	63.1451			17.8
-3.2	15.4	42.4185	5.68111	100.27	19	51.8408	5.64862	101.324	15.4	42.8581	5.59749	91.3227	14.4	52.5748	5.63065	101.039	16.9	62.4483	5.61865	99.9436					-2	45.2298	5.63995	100.122	29	44.1029	5.71067	100.963	17.9	82.1802	5.58447	100.178	14.5	60.7809	5.76664	98.3886				#DIV/0!	40	63.2617			17.9
-3.1	15.5	43.0256	5.68108	100.877	19.1	52.6445	5.64985	102.128	15.5	41.74	5.59637	90.2046	14.5	52.9411	5.63119	101.406	17	61.9718	5.61826	99.4671					-1.9	44.6223	5.63917	99.5144	29.1	44.4285	5.71145	101.289	18	83.1643	5.5841	101.162	14.6	60.8112	5.76682	98.4189				#DIV/0!	40.1	63.9015			18
-3	15.6	43.0033	5.68029	100.854	19.2	51.8458	5.65	101.329	15.6	41.5471	5.59657	90.0117	14.6	53.1575	5.63127	101.622	17.1	62.1127	5.61732	99.608					-1.8	44.8509	5.6392	99.743	29.2	43.9503	5.71172	100.811	18.1	82.299	5.58465	100.297	14.7	61.2641	5.76708	98.8718				#DIV/0!	40.2	66.726			18.1
-2.9	15.7	41.2552	5.67936	99.1062	19.3	50.8129	5.64924	100.296	15.7	42.417	5.59658	90.8816	14.7	54.1812	5.63159	102.646	17.2	62.5444	5.61637	100.04					-1.7	44.7114	5.63951	99.6035	29.3	43.7772	5.71141	100.638	18.2	81.5163	5.58598	99.5142	14.8	61.3842	5.76659	98.9919				#DIV/0!	40.3	68.0778			18.2
-2.8	15.8	39.9879	5.68076	97.8389	19.4	50.1342	5.64977	99.6176	15.8	43.4878	5.59565	91.9524	14.8	54.0412	5.63076	102.506	17.3	62.2742	5.61573	99.7695					-1.6	44.9688	5.63995	99.8609	29.4	43.0965	5.71137	99.9569	18.3	82.1942	5.58677	100.192	14.9	61.9362	5.76617	99.5439				#DIV/0!	40.4	67.1494			18.3
-2.7	15.9	40.4633	5.68072	98.3143	19.5	51.3386	5.64959	100.822	15.9	44.8473	5.59578	93.3119	14.9	52.7148	5.62968	101.179	17.4	62.7012	5.61546	100.197					-1.5	45.4698	5.64075	100.362	29.5	42.9367	5.71046	99.7971	18.4	82.3566	5.58671	100.354	15	63.3068	5.76499	100.914				#DIV/0!	40.5	66.377			18.4
-2.6	16	42.0072	5.68008	99.8582	19.6	52.8549	5.64806	102.338	16	46.6681	5.59443	95.1327	15	53.2054	5.63016	101.67	17.5	63.5991	5.6156	101.094					-1.4	45.0635	5.64086	99.9556	29.6	44.0823	5.70986	100.943	18.5	82.8787	5.5868	100.877	15.1	63.2572	5.76567	100.865				#DIV/0!	40.6	65.7993			18.5
-2.5	16.1	42.6596	5.68132	100.511	19.7	53.0049	5.64805	102.488	16.1	46.1228	5.59489	94.5874	15.1	54.4627	5.63123	102.927	17.6	64.3168	5.61479	101.812					-1.3	45.0065	5.64049	99.8986	29.7	44.1155	5.71064	100.976	18.6	82.2438	5.58635	100.242	15.2	62.5319	5.76627	100.14				#DIV/0!	40.7	64.49			18.6
-2.4	16.2	41.4299	5.68157	99.2809	19.8	53.082	5.64786	102.565	16.2	44.4463	5.59588	92.9109	15.2	54.7865	5.6308	103.251	17.7	62.9459	5.61459	100.441					-1.2	45.793	5.64024	100.685	29.8	43.5189	5.71127	100.379	18.7	83.003	5.58515	101.001	15.3	61.7583	5.76588	99.366				#DIV/0!	40.8	63.4953			18.7
-2.3	16.3	41.1357	5.6803	98.9867	19.9	53.5041	5.64774	102.988	16.3	45.4387	5.59517	93.9033	15.3	53.8114	5.63067	102.276	17.8	62.3526	5.61585	99.8479					-1.1	46.6463	5.64089	101.538	29.9	44.4305	5.71123	101.291	18.8	83.8434	5.58341	101.841	15.4	60.7091	5.76677	98.3168				#DIV/0!	40.9	62.9303			18.8
-2.2	16.4	42.4091	5.67955	100.26	20	53.3478	5.64716	102.831	16.4	46.5776	5.59348	95.0422	15.4	52.5947	5.6316	101.059	17.9	62.7375	5.61667	100.233					-1	46.5762	5.64045	101.468	30	44.5633	5.71004	101.424	18.9	83.5939	5.58219	101.592	15.5	60.7819	5.76624	98.3896				#DIV/0!	41	63.5274			18.9
-2.1	16.5	42.7473	5.68032	100.598	20.1	52.3447	5.64632	101.828	16.5	46.2655	5.59282	94.7301	15.5	51.9565	5.63135	100.421	18	62.4096	5.61697	99.9049					-0.9	45.0718	5.63986	99.9639	30.1	42.8632	5.70886	99.7236	19	85.0494	5.58145	103.047	15.6	61.563	5.7657	99.1707				#DIV/0!	41.1	65.8659			19
-2	16.6	41.7907	5.68057	99.6417	20.2	51.7219	5.64673	101.205	16.6	44.9009	5.59256	93.3655	15.6	51.7221	5.63181	100.187	18.1	62.4616	5.61697	99.9569					-0.8	44.2743	5.64113	99.1664	30.2	41.9628	5.70997	98.8232	19.1	85.3725	5.58205	103.37	15.7	62.632	5.76626	100.24				#DIV/0!	41.2	65.5081			19.1
-1.9	16.7	42.084	5.67964	99.935	20.3	51.3088	5.6465	100.792	16.7	43.2481	5.59082	91.7127	15.7	50.8619	5.63209	99.3265	18.2	62.3767	5.61692	99.872					-0.7	45.4862	5.64161	100.378	30.3	41.9783	5.71009	98.8387	19.2	84.4123	5.5822	102.41	15.8	63.4061	5.76505	101.014				#DIV/0!	41.3	64.9008			19.2
-1.8	16.8	43.6267	5.67845	101.478	20.4	50.514	5.64677	99.9974	16.8	43.7204	5.59103	92.185	15.8	49.7505	5.63326	98.2151	18.3	62.3457	5.61677	99.841					-0.6	45.8575	5.64059	100.75	30.4	42.7548	5.71017	99.6152	19.3	85.218	5.58141	103.216	15.9	62.7339	5.76475	100.342				#DIV/0!	41.4	66.6582			19.3
-1.7	16.9	43.9189	5.67906	101.77	20.5	50.416	5.64617	99.8994	16.9	43.6675	5.59176	92.1321	15.9	49.0859	5.63337	97.5505	18.4	61.9235	5.61668	99.4188					-0.5	45.3392	5.63989	100.231	30.5	43.0655	5.71124	99.9259	19.4	86.0402	5.57996	104.038	16	61.7875	5.76556	99.3952				#DIV/0!	41.5	67.0606			19.4
-1.6	17	42.8527	5.67922	100.704	20.6	50.9727	5.64576	100.456	17	41.9687	5.59248	90.4333	16	48.2848	5.63419	96.7494	18.5	62.6521	5.61613	100.147					-0.4	45.3924	5.63988	100.284	30.6	43.1508	5.71179	100.011	19.5	85.4327	5.57905	103.431	16.1	61.5121	5.76509	99.1198				#DIV/0!	41.6	65.8846			19.5
-1.5	17.1	41.8758	5.67806	99.7268	20.7	50.8641	5.64592	100.348	17.1	42.3251	5.59145	90.7897	16.1	47.947	5.63424	96.4116	18.6	63.9511	5.61491	101.446					-0.3	44.9113	5.63994	99.8034	30.7	43.9633	5.71251	100.824	19.6	86.1183	5.57893	104.116	16.2	61.5355	5.76514	99.1432				#DIV/0!	41.7	65.5545			19.6
-1.4	17.2	41.892	5.67828	99.743	20.8	50.4277	5.64619	99.9111	17.2	43.6801	5.59014	92.1447	16.2	48.1756	5.63465	96.6402	18.7	63.1901	5.61485	100.685					-0.2	44.5732	5.64057	99.4653	30.8	43.0439	5.71211	99.9043	19.7	86.2419	5.57947	104.24	16.3	61.1004	5.76525	98.7081				#DIV/0!	41.8	66.5941			19.7
-1.3	17.3	41.3928	5.67854	99.2438	20.9	50.9215	5.646	100.405	17.3	44.0293	5.59015	92.4939	16.3	47.9855	5.63535	96.4501	18.8	63.015	5.61559	100.51					-0.1	45.3968	5.64087	100.289	30.9	42.9504	5.71049	99.8108	19.8	85.6181	5.57979	103.616	16.4	60.4743	5.766	98.082				#DIV/0!	41.9	66.6374			19.8
-1.2	17.4	41.4875	5.6794	99.3385	21	55.4754	5.64527	104.959	17.4	44.5703	5.58978	93.0349	16.4	46.9359	5.63618	95.4005	18.9	63.595	5.61625	101.09					0	45.6536	5.64015	100.546	31	45.1054	5.7092	101.966	19.9	85.4571	5.57953	103.455	16.5	60.6271	5.76594	98.2348				#DIV/0!	42	65.0161			19.9
-1.1	17.5																								0.1				31.1				20				16.6							#DIV/0!	42.1				20
-1	17.6																								0.2				31.2				20.1				16.7							#DIV/0!	42.2				20.1
-0.9	17.7																								0.3				31.3				20.2				16.8							#DIV/0!	42.3				20.2
-0.8	17.8																								0.4				31.4				20.3				16.9							#DIV/0!	42.4				20.3
-0.7	17.9																								0.5				31.5				20.4				17							#DIV/0!	42.5				20.4
-0.6	18																								0.6				31.6				20.5				17.1							#DIV/0!	42.6				20.5
-0.5	18.1																								0.7				31.7				20.6				17.2							#DIV/0!	42.7				20.6
-0.4	18.2																								0.8				31.8				20.7				17.3							#DIV/0!	42.8				20.7
-0.3	18.3																								0.9				31.9				20.8				17.4							#DIV/0!	42.9				20.8
-0.2	18.4																								1				32	48.0784	5.67425	104.939	20.9				17.5							#DIV/0!	43				20.9
-0.1	18.5																								1.1				32.1	49.7891	5.68741	106.65	21				17.6							#DIV/0!	43.1	86.3659			21
0	18.6																								1.2				32.2	44.446	5.6968	101.306	21.1				17.7								43.2	69.8615			21.1
0.1	18.7																								1.3				32.3	44.4592	5.70097	101.32	21.2				17.8								43.3	74.9107			21.2
0.2	18.8	50.6717	5.60948		22.4				18.8				17.8	64.8771	5.58918		20.3								1.4				32.4	43.432	5.70459	100.292	21.3				17.9								43.4	77.6345			21.3
0.3	18.9	53.9012	5.61683		22.5				18.9				17.9	64.5927	5.5888	113.057	20.4								1.5	57.7584	5.59414	112.65	32.5	42.5759	5.7074	99.4363	21.4				18	61.5968	5.75486	99.2045					43.5	88.1043			21.4
0.4	19	55.0421	5.61971	112.893	22.6	63.3591	5.63944		19	57.9804	5.54306		18	63.7334	5.58876	112.198	20.5								1.6	57.172	5.5986	112.064	32.6	40.5902	5.71093	97.4506	21.5				18.1	62.687	5.75013	100.295					43.6	91.7628			21.5
0.5	19.1	56.5617	5.62424	114.413	22.7	64.1411	5.63793	113.625	19.1	55.9187	5.53716	104.383	18.1	61.7817	5.58787	110.246	20.6	76.1232	5.60827	113.619					1.7	57.2482	5.60307	112.14	32.7	41.571	5.71238	98.4314	21.6	78.3291	5.55011	96.327	18.2	65.7712	5.74479	103.379					43.7	93.3716			21.6
0.6	19.2	54.9475	5.62643	112.799	22.8	67.626	5.63579	117.109	19.2	58.2786	5.53394	106.743	18.2	61.4794	5.58902	109.944	20.7	77.2944	5.60675	114.79					1.8	55.7385	5.60682	110.631	32.8	41.3386	5.71242	98.199	21.7	77.4492	5.54924	95.4471	18.3	64.0169	5.74284	101.625					43.8	101.246			21.7
0.7	19.3	53.9643	5.62714	111.815	22.9	65.7908	5.63717	115.274	19.3	57.0577	5.53254	105.522	18.3	60.0641	5.59002	108.529	20.8	79.0088	5.60432	116.504					1.9	56.3549	5.60945	111.247	32.9	40.6131	5.71217	97.4735	21.8	77.7225	5.54934	95.7204	18.4	64.5888	5.74389	102.196					43.9	99.665			21.8
0.8	19.4	52.8105	5.62886	110.662	23	62.3837	5.64037	111.867	19.4	60.3307	5.53246	108.795	18.4	59.1421	5.59227	107.607	20.9	78.805	5.60318	116.3					2	55.2502	5.61103	110.142	33	39.6679	5.71287	96.5283	21.9	80.8525	5.54972	98.8504	18.5	63.5476	5.74601	101.155					44	102.469			21.9
0.9	19.5	52.2649	5.62951	110.116	23.1	63.7598	5.64027	113.243	19.5	62.0507	5.53541	110.515	18.5	57.9879	5.59392	106.453	21	79.638	5.60245	117.133					2.1	54.8742	5.61161	109.766	33.1	40.1184	5.71246	96.9788	22	83.4983	5.5471	101.496	18.6	62.9249	5.7492	100.533					44.1	103.441			22
1	19.6	52.6496	5.63069	110.501	23.2	64.9382	5.63865	114.422	19.6	61.9482	5.53637	110.413	18.6	56.8035	5.59649	105.268	21.1	78.0741	5.60244	115.569					2.2	55.0189	5.61252	109.911	33.2	40.3495	5.71152	97.2099	22.1	85.67	5.54648	103.668	18.7	65.1059	5.75216	102.714				#DIV/0!	44.2	104.636			22.1
1.1	19.7	52.9037	5.63246	110.755	23.3	64.5498	5.63807	114.033	19.7	62.3804	5.53736	110.845	18.7	55.3697	5.59822	103.834	21.2	77.9347	5.604	115.43					2.3	54.6317	5.61372	109.524	33.3	43.4013	5.71076	100.262	22.2	88.4152	5.54396	106.413	18.8	65.9374	5.75122	103.545				#DIV/0!	44.3	104.156			22.2
1.2	19.8	51.905	5.63371	109.756	23.4	64.2805	5.63803	113.764	19.8	62.1371	5.53781	110.602	18.8	52.5712	5.60115	101.036	21.3	77.6025	5.60571	115.098					2.4	54.64	5.61519	109.532	33.4	45.9149	5.70623	102.775	22.3	88.4904	5.54351	106.488	18.9	70.7062	5.75131	108.314				#DIV/0!	44.4	103.115			22.3
1.3	19.9	49.5751	5.63398	107.426	23.5	64.2349	5.63768	113.718	19.9	62.0914	5.5381	110.556	18.9	51.1873	5.60165	99.6519	21.4	77.3798	5.60744	114.875					2.5	54.353	5.61687	109.245	33.5	47.3331	5.70428	104.194	22.4	89.6887	5.54308	107.687	19	74.7967	5.74425	112.404				#DIV/0!	44.5	102.529			22.4
1.4	20	47.4229	5.63688	105.274	23.6	65.8494	5.63744	115.333	20	62.2708	5.53838	110.735	19	50.8367	5.60348	99.3013	21.5	76.9056	5.60926	114.401					2.6	53.8587	5.61864	108.751	33.6	47.8631	5.70083	104.724	22.5	90.4283	5.54367	108.426	19.1	76.1399	5.7415	113.748				#DIV/0!	44.6	101.148			22.5
1.5	20.1	47.4292	5.63768	105.28	23.7	65.6616	5.63896	115.145	20.1	64.3658	5.53888	112.83	19.1	52.1178	5.60517	100.582	21.6	76.0718	5.61124	113.567					2.7	54.2846	5.6201	109.177	33.7	48.6395	5.69755	105.5	22.6	91.686	5.54346	109.684	19.2	78.6476	5.73749	116.255				#DIV/0!	44.7	102.092			22.6
1.6	20.2	48.684	5.63837	106.535	23.8	64.1753	5.64043	113.659	20.2	66.4419	5.53733	114.907	19.2	51.6579	5.60536	100.123	21.7	75.6271	5.61271	113.122					2.8	52.907	5.62087	107.799	33.8	50.8779	5.69377	107.738	22.7	90.5231	5.54438	108.521	19.3	79.3404	5.73608	116.948				#DIV/0!	44.8	103.708			22.7
1.7	20.3	50.0049	5.6406	107.856	23.9	65.6956	5.64049	115.179	20.3	67.0544	5.53752	115.519	19.3	51.6668	5.60511	100.131	21.8	73.5865	5.61438	111.082					2.9	52.654	5.62018	107.546	33.9	51.3506	5.6922	108.211	22.8	87.5459	5.5462	105.544	19.4	80.1326	5.73404	117.74				#DIV/0!	44.9	104.807			22.8
1.8	20.4	49.8524	5.641	107.703	24	66.9949	5.63882	116.478	20.4	65.8816	5.5371	114.346	19.4	52.334	5.60487	100.799	21.9	74.5968	5.61424	112.092					3	53.7535	5.61988	108.646	34	51.5545	5.69027	108.415	22.9	88.3525	5.54559	106.35	19.5	79.3371	5.73261	116.945				#DIV/0!	45	107.191			22.9
1.9	20.5	47.3665	5.64129	105.218	24.1	67.1134	5.63833	116.597	20.5	65.8747	5.53551	114.339	19.5	53.6348	5.60529	102.099	22	75.2146	5.61308	112.71					3.1	54.0293	5.62078	108.921	34.1	51.1615	5.68832	108.022	23	88.5931	5.54435	106.591	19.6	78.576	5.73269	116.184				#DIV/0!	45.1	106.402			23
2	20.6	45.5598	5.64442	103.411	24.2	68.5753	5.63779	118.059	20.6	67.6534	5.53416	116.118	19.6	54.6048	5.60433	103.069	22.1	76.0163	5.61234	113.512					3.2	53.5244	5.62124	108.416	34.2	52.5638	5.68712	109.424	23.1	87.3075	5.5431	105.305	19.7	79.0839	5.73171	116.692				#DIV/0!	45.2	104.291			23.1
2.1	20.7	44.7545	5.64584	102.606	24.3	68.3091	5.63879	117.793	20.7	66.3073	5.53428	114.772	19.7	54.629	5.60424	103.094	22.2	76.3213	5.61092	113.817					3.3	53.5613	5.62119	108.453	34.3	53.9057	5.68742	110.766	23.2	87.6054	5.54327	105.603	19.8	80.1859	5.73025	117.794				#DIV/0!	45.3	102.553			23.2
2.2	20.8	42.5244	5.64803	100.375	24.4	67.3464	5.63992	116.83	20.8	65.6181	5.53564	114.083	19.8	55.4735	5.60413	103.938	22.3	77.0699	5.60954	114.565					3.4	53.2584	5.62111	108.15	34.4	54.7387	5.68608	111.599	23.3	88.6888	5.54375	106.687	19.9	80.2884	5.72999	117.896				#DIV/0!	45.4	101.708			23.3
2.3	20.9	43.0238	5.64786	100.875	24.5	67.9967	5.64016	117.48	20.9	65.5403	5.53655	114.005	19.9	56.7199	5.60486	105.185	22.4	78.1153	5.60765	115.611					3.5	52.7408	5.62067	107.633	34.5	55.5017	5.68553	112.362	23.4	88.4987	5.54314	106.497	20	80.7554	5.72965	118.363				#DIV/0!	45.5	101.35			23.4
2.4	21	45.8214	5.64712	103.672	24.6	68.9737	5.63962	118.457	21	64.6442	5.53741	113.109	20	55.9087	5.60423	104.373	22.5	78.9911	5.60648	116.486					3.6	52.5963	5.62088	107.488	34.6	56.286	5.68415	113.146	23.5	87.7015	5.54224	105.699	20.1	81.3649	5.72988	118.973				#DIV/0!	45.6	99.8176			23.5
2.5	21.1	45.2888	5.64958	103.14	24.7	68.2622	5.64009	117.746	21.1	65.3353	5.53754	113.8	20.1	55.6633	5.6027	104.128	22.6	79.8689	5.60464	117.364					3.7	52.7431	5.62096	107.635	34.7	55.4371	5.6835	112.298	23.6	88.0557	5.54224	106.054	20.2	81.4506	5.72918	119.058				#DIV/0!	45.7	101.766			23.6
2.6	21.2	44.2795	5.65237	102.131	24.8	66.7741	5.64127	116.258	21.2	66.1434	5.537	114.608	20.2	56.7757	5.60162	105.24	22.7	80.7779	5.60334	118.273					3.8	51.4273	5.62085	106.319	34.8	54.6608	5.68396	111.521	23.7	88.174	5.54257	106.172	20.3	82.5461	5.72842	120.154				#DIV/0!	45.8	103.904			23.7
2.7	21.3	45.2879	5.65429	103.139	24.9	67.4605	5.64099	116.944	21.3	66.2625	5.53715	114.727	20.3	58.3155	5.60152	106.78	22.8	81.5337	5.60136	119.029					3.9	50.813	5.61924	105.705	34.9	54.0748	5.68356	110.935	23.8	87.6357	5.54273	105.634	20.4	84.3213	5.7263	121.929				#DIV/0!	45.9	104.828			23.8
2.8	21.4	43.6504	5.65478	101.501	25	68.301	5.63998	117.784	21.4	63.9917	5.53716	112.456	20.4	59.0629	5.59988	107.528	22.9	80.7451	5.59978	118.24					4	51.3978	5.61855	106.29	35	54.8415	5.68392	111.702	23.9	85.8963	5.54242	103.894	20.5	84.9085	5.72613	122.516				#DIV/0!	46	106.212			23.9
2.9	21.5	42.9592	5.65337	100.81	25.1	68.9777	5.63974	118.461	21.5	63.2896	5.53504	111.754	20.5	57.9677	5.59877	106.432	23	81.2473	5.59928	118.743					4.1	51.2107	5.61842	106.103	35.1	54.8939	5.68524	111.754	24	83.4087	5.54378	101.407	20.6	84.7906	5.72517	122.398				#DIV/0!	46.1	105.36			24
3	21.6	44.9379	5.65296	102.789	25.2	69.8841	5.63878	119.368	21.6	64.1277	5.53386	112.592	20.6	58.3236	5.59891	106.788	23.1	81.4827	5.5992	118.978					4.2	50.5207	5.61852	105.413	35.2	54.4222	5.6863	111.283	24.1	82.1412	5.54308	100.139	20.7	83.5869	5.72379	121.195				#DIV/0!	46.2	104.652			24.1
3.1	21.7	44.332	5.65485	102.183	25.3	69.0783	5.63867	118.562	21.7	62.1672	5.53332	110.632	20.7	59.7732	5.59942	108.238	23.2	81.6636	5.59889	119.159					4.3	49.5747	5.61785	104.467	35.3	54.4783	5.68696	111.339	24.2	82.1272	5.54367	100.125	20.8	83.1812	5.72447	120.789				#DIV/0!	46.3	102.903			24.2
3.2	21.8	42.1784	5.65724	100.029	25.4	67.8919	5.63948	117.375	21.8	61.8737	5.53468	110.338	20.8	60.5518	5.59841	109.016	23.3	82.7004	5.59871	120.196					4.4	48.7704	5.61834	103.662	35.4	54.2474	5.68745	111.108	24.3	83.2391	5.54436	101.237	20.9	83.0174	5.72477	120.625				#DIV/0!	46.4	101.247			24.3
3.3	21.9	41.9317	5.65733	99.7827	25.5	67.6951	5.6391	117.179	21.9	62.9207	5.53594	111.385	20.9	60.4919	5.59805	108.957	23.4	82.9148	5.59753	120.41					4.5	49.3613	5.61798	104.253	35.5	53.8988	5.68774	110.759	24.4	83.8891	5.54389	101.887	21	83.1864	5.72522	120.794				#DIV/0!	46.5	100.678			24.4
3.4	22	40.6563	5.6577	98.5073	25.6	68.9059	5.63902	118.389	22	64.4143	5.53605	112.879	21	60.1354	5.59779	108.6	23.5	82.4721	5.59633	119.967					4.6	49.4996	5.617	104.392	35.6	52.7924	5.6884	109.653	24.5	84.0806	5.54395	102.078	21.1	83.2474	5.72603	120.855				#DIV/0!	46.6	98.8527			24.5
3.5	22.1	38.8338	5.65659	96.6848	25.7	69.7507	5.64027	119.234	22.1	65.034	5.53759	113.499	21.1	59.6359	5.59714	108.101	23.6	80.988	5.5958	118.483					4.7	49.0917	5.61606	103.984	35.7	51.3084	5.68783	108.169	24.6	83.4816	5.54382	101.479	21.2	81.83	5.72653	119.438				#DIV/0!	46.7	99.7115			24.6
3.6	22.2	38.4047	5.65779	96.2557	25.8	69.3848	5.64035	118.868	22.2	63.142	5.53832	111.607	21.2	60.0711	5.59708	108.536	23.7	80.6845	5.5937	118.18					4.8	49.6899	5.61569	104.582	35.8	51.1148	5.68913	107.975	24.7	82.6563	5.54311	100.654	21.3	81.5118	5.72517	119.119				#DIV/0!	46.8	101.844			24.7
3.7	22.3	38.7761	5.65859	96.6271	25.9	68.2157	5.64003	117.699	22.3	61.5877	5.53737	110.052	21.3	60.8351	5.59745	109.3	23.8	82.3202	5.59229	119.816					4.9	49.2591	5.61595	104.151	35.9	51.3542	5.69037	108.215	24.8	81.2911	5.54329	99.289	21.4	81.2535	5.72462	118.861				#DIV/0!	46.9	100.938			24.8
3.8	22.4	39.7581	5.65887	97.6091	26	67.2093	5.64108	116.693	22.4	62.1398	5.53802	110.604	21.4	61.4732	5.597	109.938	23.9	82.1059	5.59223	119.601					5	47.6489	5.61665	102.541	36	50.3017	5.69115	107.162	24.9	80.6167	5.54223	98.6146	21.5	81.6499	5.72356	119.258				#DIV/0!	47	100.916			24.9
3.9	22.5	40.1243	5.66036	97.9753	26.1	68.4818	5.64119	117.965	22.5	64.2588	5.53927	112.723	21.5	62.3367	5.59713	110.801	24	80.5633	5.59239	118.059					5.1	47.007	5.61564	101.899	36.1	49.99	5.69077	106.85	25	81.4947	5.54199	99.4926	21.6	83.4212	5.72223	121.029				#DIV/0!	47.1	100.287			25
4	22.6	39.0195	5.66124	96.8705	26.2	70.307	5.63984	119.79	22.6	63.6265	5.53835	112.091	21.6	63.6218	5.59638	112.086	24.1	80.1081	5.59106	117.603					5.2	46.688	5.61547	101.58	36.2	50.7372	5.69082	107.598	25.1	80.2806	5.54251	98.2785	21.7	82.9974	5.72301	120.605				#DIV/0!	47.2	98.8841			25.1
4.1	22.7	38.273	5.66088	96.124	26.3	70.1216	5.6403	119.605	22.7	61.7286	5.5367	110.193	21.7	64.1452	5.5968	112.61	24.2	80.5873	5.59042	118.083					5.3	46.3674	5.61493	101.259	36.3	51.1496	5.69177	108.01	25.2	78.996	5.54406	96.9939	21.8	82.048	5.72418	119.656				#DIV/0!	47.3	97.1281			25.2
4.2	22.8	38.3675	5.66146	96.2185	26.4	68.6677	5.64089	118.151	22.8	61.4962	5.53707	109.961	21.8	63.7805	5.59664	112.245	24.3	80.8509	5.59013	118.346					5.4	46.9467	5.6148	101.839	36.4	50.5679	5.6921	107.428	25.3	79.9616	5.54468	97.9595	21.9	82.3939	5.72433	120.002				#DIV/0!	47.4	95.8213			25.3
4.3	22.9	38.5571	5.66222	96.4081	26.5	67.4469	5.63994	116.93	22.9	62.9947	5.53726	111.459	21.9	63.8827	5.59609	112.347	24.4	81.5091	5.58964	119.004					5.5	47.2171	5.61532	102.109	36.5	49.341	5.69176	106.201	25.4	79.5896	5.54431	97.5875	22	82.5671	5.72396	120.175				#DIV/0!	47.5	95.9767			25.4
4.4	23	38.2465	5.66266	96.0975	26.6	67.2169	5.64054	116.7	23	62.9467	5.53602	111.411	22	64.0158	5.59552	112.48	24.5	83.0267	5.58971	120.522					5.6	46.9526	5.61547	101.845	36.6	48.7386	5.69295	105.599	25.5	77.8607	5.54352	95.8586	22.1	82.5675	5.72373	120.175				#DIV/0!	47.6	95.7525			25.5
4.5	23.1	37.989	5.66278	95.84	26.7	68.1347	5.64098	117.618	23.1	61.7665	5.53456	110.231	22.1	63.9694	5.595	112.434	24.6	84.6648	5.58828	122.16					5.7	47.281	5.61534	102.173	36.7	49.3553	5.69358	106.216	25.6	78.1734	5.54448	96.1713	22.2	82.8643	5.72356	120.472				#DIV/0!	47.7	95.2477			25.6
4.6	23.2	37.3531	5.6632	95.2041	26.8	68.4297	5.64031	117.913	23.2	60.778	5.53441	109.243	22.2	63.2283	5.59461	111.693	24.7	84.5903	5.58818	122.086					5.8	48.0911	5.61485	102.983	36.8	49.4495	5.69338	106.31	25.7	78.7203	5.54587	96.7182	22.3	82.7477	5.72376	120.355				#DIV/0!	47.8	92.5146			25.7
4.7	23.3	36.7249	5.66289	94.5759	26.9	68.3257	5.63985	117.809	23.3	60.3931	5.53331	108.858	22.3	62.7029	5.59342	111.168	24.8	83.8587	5.58817	121.354					5.9	48.3222	5.61522	103.214	36.9	49.1191	5.69326	105.98	25.8	78.5791	5.54653	96.577	22.4	82.1348	5.72407	119.742				#DIV/0!	47.9	90.5305			25.8
4.8	23.4	35.6903	5.66338	93.5413	27	68.9391	5.63959	118.423	23.4	59.5993	5.53271	108.064	22.4	62.0115	5.59292	110.476	24.9	83.8471	5.58745	121.342					6	48.0986	5.61528	102.991	37	49.1256	5.69356	105.986	25.9	78.6552	5.54716	96.6531	22.5	82.7051	5.72361	120.313				#DIV/0!	48	89.8923			25.9
4.9	23.5	35.0694	5.66265	92.9204	27.1	68.502	5.63997	117.985	23.5	58.4602	5.5313	106.925	22.5	62.7575	5.59167	111.222	25	81.8214	5.58687	119.317					6.1	48.7365	5.6151	103.629	37.1	49.4975	5.69391	106.358	26	77.5568	5.54761	95.5547	22.6	82.4139	5.72247	120.022				#DIV/0!	48.1	89.8985			26
5	23.6	36.4326	5.66275	94.2836	27.2	68.1966	5.64078	117.68	23.6	59.1134	5.53112	107.578	22.6	63.4567	5.58986	111.921	25.1	81.4201	5.58422	118.915					6.2	48.593	5.61422	103.485	37.2	48.7026	5.69376	105.563	26.1	78.0645	5.54711	96.0624	22.7	81.2764	5.72062	118.884				#DIV/0!	48.2	89.8418			26.1
5.1	23.7	36.5737	5.66453	94.4247	27.3	68.4987	5.64138	117.982	23.7	58.9901	5.53154	107.455	22.7	61.9994	5.58847	110.464	25.2	82.2292	5.58244	119.725					6.3	47.7704	5.61308	102.662	37.3	47.8744	5.69262	104.735	26.2	78.1142	5.54623	96.1121	22.8	81.8728	5.72084	119.48				#DIV/0!	48.3	86.3943			26.2
5.2	23.8	35.4969	5.66595	93.3479	27.4	68.7866	5.64154	118.27	23.8	57.6356	5.53201	106.1	22.8	61.4167	5.58871	109.881	25.3	82.3364	5.58112	119.832					6.4	47.9443	5.61299	102.836	37.4	47.6379	5.69264	104.498	26.3	77.4953	5.54523	95.4932	22.9	81.6527	5.72195	119.26				#DIV/0!	48.4	83.7621			26.3
5.3	23.9	35.4375	5.66619	93.2885	27.5	69.5656	5.64205	119.049	23.9	55.7169	5.53129	104.182	22.9	62.7306	5.58841	111.195	25.4	84.1582	5.57993	121.654					6.5	47.9625	5.61309	102.855	37.5	47.5641	5.69238	104.425	26.4	78.4698	5.54498	96.4677	23	80.8657	5.72308	118.473				#DIV/0!	48.5	81.3141			26.4
5.4	24	34.9157	5.66649	92.7667	27.6	69.4125	5.64159	118.896	24	56.7171	5.53244	105.182	23	64.0318	5.58687	112.496	25.5	84.3784	5.58027	121.874					6.6	47.9555	5.61315	102.848	37.6	48.6236	5.69224	105.484	26.5	78.9286	5.54559	96.9265	23.1	79.8825	5.7234	117.49				#DIV/0!	48.6	78.9845			26.5
5.5	24.1	34.9869	5.66617	92.8379	27.7	68.2194	5.64087	117.703	24.1	57.2153	5.53466	105.68	23.1	63.3165	5.58638	111.781	25.6	83.666	5.58034	121.161					6.7	47.9831	5.61321	102.875	37.7	49.2298	5.69336	106.09	26.6	78.0956	5.54568	96.0935	23.2	78.3477	5.72501	115.955				#DIV/0!	48.7	75.4975			26.6
5.6	24.2	35.2056	5.6658	93.0566	27.8	68.7856	5.64163	118.269	24.2	57.5132	5.53614	105.978	23.2	62.5778	5.58666	111.042	25.7	82.1887	5.57973	119.684					6.8	47.0153	5.61324	101.907	37.8	48.8445	5.6936	105.705	26.7	79.5047	5.545	97.5026	23.3	77.8283	5.72489	115.436				#DIV/0!	48.8	71.3214			26.7
5.7	24.3	34.0527	5.66566	91.9037	27.9	70.6976	5.64316	120.181	24.3	57.9218	5.53809	106.386	23.3	62.8264	5.58625	111.291	25.8	82.1237	5.58065	119.619					6.9	46.2689	5.61219	101.161	37.9	48.9557	5.6934	105.816	26.8	81.2451	5.54313	99.243	23.4	77.9745	5.72553	115.582				#DIV/0!	48.9	69.4239			26.8
5.8	24.4	33.6442	5.66695	91.4952	28	71.2868	5.64226	120.77	24.4	56.8206	5.5394	105.285	23.4	63.3833	5.58566	111.848	25.9	83.2569	5.58168	120.752					7	46.9181	5.61209	101.81	38	48.4873	5.69308	105.348	26.9	80.5391	5.54255	98.537	23.5	78.5469	5.72653	116.155				#DIV/0!	49	66.6106			26.9
5.9	24.5	34.741	5.66787	92.592	28.1	70.0021	5.64185	119.486	24.5	55.8518	5.53984	104.316	23.5	63.2309	5.58553	111.696	26	83.2064	5.58143	120.702					7.1	46.8052	5.61271	101.697	38.1	47.8247	5.69216	104.685	27	80.5904	5.54272	98.5883	23.6		5.72653					#DIV/0!	49.1	63.1403			27
6	24.6	35.3729	5.66734	93.2239	28.2	69.02	5.64296	118.503	24.6	56.7909	5.54114	105.256	23.6	62.2794	5.58557	110.744	26.1	83.0033	5.58108	120.499					7.2	45.3715	5.61338	100.264	38.2	47.2589	5.69217	104.119	27.1	78.8548	5.54296	96.8527	23.7		5.72653					#DIV/0!	49.2	59.0163			27.1
6.1	24.7	35.8115	5.66754	93.6625	28.3	70.1209	5.64317	119.604	24.7	57.2489	5.54349	105.714	23.7	62.2406	5.58468	110.705	26.2	81.6458	5.581	119.141					7.3	45.8026	5.61253	100.695	38.3	46.9608	5.69149	103.821	27.2	76.6354	5.54477	94.6333	23.8		5.72653					#DIV/0!	49.3	56.9997			27.2
6.2	24.8	36.5802	5.66717	94.4312	28.4	71.6817	5.64209	121.165	24.8	55.3881	5.54511	103.853	23.8	62.4125	5.58396	110.877	26.3	80.1293	5.57959	117.625					7.4	46.1135	5.61131	101.006	38.4	48.0741	5.69126	104.935	27.3	77.2402	5.54483	95.2381	23.9	76.8921	5.73083	114.5				#DIV/0!	49.4	55.2578			27.3
6.3	24.9	35.2489	5.66772	93.0999	28.5	71.2835	5.64258	120.767	24.9	55.5436	5.54515	104.008	23.9	62.767	5.58331	111.232	26.4	79.5597	5.57989	117.055					7.5	45.0448	5.61028	99.9369	38.5	49.0651	5.69235	105.926	27.4	76.1517	5.54431	94.1496	24	76.6398	5.7302	114.247				#DIV/0!	49.5	53.27			27.4
6.4	25	33.5701	5.66985	91.4211	28.6	69.8122	5.64343	119.296	25	55.5099	5.54504	103.975	24	62.447	5.5824	110.912	26.5	79.5698	5.5797	117.065					7.6	44.8258	5.61056	99.7179	38.6	48.6873	5.69209	105.548	27.5	74.3067	5.54269	92.3046	24.1	76.2263	5.72906	113.834				#DIV/0!	49.6	49.8414			27.5
6.5	25.1	34.2201	5.67011	92.0711	28.7	69.7183	5.64277	119.202	25.1	56.2781	5.54487	104.743	24.1	62.2243	5.58106	110.689	26.6	78.4033	5.57953	115.899					7.7	45.045	5.61063	99.9371	38.7	48.4946	5.69134	105.355	27.6	73.9487	5.54305	91.9466	24.2	76.5885	5.72878	114.196				#DIV/0!	49.7	47.7726			27.6
6.6	25.2	34.9908	5.66954	92.8418	28.8	70.5826	5.64233	120.066	25.2	56.0974	5.54399	104.562	24.2	62.586	5.58012	111.051	26.7	80.8339	5.57822	118.329					7.8	45.4748	5.61044	100.367	38.8	49.2592	5.69092	106.12	27.7	75.1142	5.54312	93.1121	24.3	77.3235	5.72896	114.931				#DIV/0!	49.8	46.4737			27.7
6.7	25.3	34.8617	5.66987	92.7127	28.9	70.1334	5.64279	119.617	25.3	55.7624	5.54283	104.227	24.3	61.4629	5.5794	109.928	26.8	83.0429	5.57482	120.538					7.9	44.7714	5.61072	99.6635	38.9	49.6005	5.69137	106.461	27.8	75.8126	5.54211	93.8105	24.4	76.6505	5.72804	114.258				#DIV/0!	49.9	44.3481			27.8
6.8	25.4	34.0499	5.67033	91.9009	29	69.8554	5.64367	119.339	25.4	56.6097	5.54213	105.074	24.4	61.2481	5.57984	109.713	26.9	82.4597	5.5729	119.955					8	43.1694	5.61174	98.0615	39	49.5855	5.69135	106.446	27.9	75.3662	5.54158	93.3641	24.5	76.4723	5.72595	114.08				#DIV/0!	50	42.1552			27.9
6.9	25.5	34.5133	5.66982	92.3643	29.1	70.3417	5.64441	119.825	25.5	56.2169	5.54215	104.682	24.5	61.2375	5.58015	109.702	27	83.0872	5.57188	120.583					8.1	42.8899	5.61109	97.782	39.1	49.5537	5.69131	106.414	28	75.1086	5.54154	93.1065	24.6	76.7785	5.72463	114.386				#DIV/0!	50.1	39.9161			28
7	25.6	35.265	5.66879	93.116	29.2	69.4695	5.64445	118.953	25.6	57.4186	5.54254	105.883	24.6	60.9789	5.58042	109.444	27.1	80.2702	5.57127	117.766					8.2	43.4018	5.61083	98.2939	39.2	48.3853	5.69131	105.246	28.1	74.647	5.54127	92.6449	24.7	76.7118	5.72341	114.319				#DIV/0!	50.2	41.1334			28.1
7.1	25.7	35.1679	5.66859	93.0189	29.3	68.7121	5.64352	118.196	25.7	59.0568	5.54412	107.521	24.7	62.7219	5.58048	111.187	27.2	78.5049	5.57341	116					8.3	44.2715	5.61111	99.1636	39.3	47.2713	5.6899	104.132	28.2	74.5254	5.54146	92.5233	24.8	76.5498	5.72259	114.157				#DIV/0!	50.3	43.6817			28.2
7.2	25.8	35.2446	5.66853	93.0956	29.4	69.7316	5.64361	119.215	25.8	56.6759	5.54394	105.141	24.8	64.001	5.57886	112.466	27.3	79.1632	5.57426	116.659					8.4	45.0797	5.61039	99.9718	39.4	48.1039	5.69002	104.964	28.3	74.7007	5.54157	92.6986	24.9	76.9488	5.72133	114.556				#DIV/0!	50.4	41.2596			28.3
7.3	25.9	35.5305	5.66856	93.3815	29.5	70.7233	5.64487	120.207	25.9	56.2751	5.54145	104.74	24.9	64.6462	5.57825	113.111	27.4	80.9832	5.57434	118.479					8.5	44.5576	5.61048	99.4497	39.5	49.6649	5.69116	106.525	28.4	75.6495	5.5415	93.6474	25	77.3985	5.71983	115.006				#DIV/0!	50.5	42.0331			28.4
7.4	26	35.6761	5.66823	93.5271	29.6	71.2489	5.64478	120.732	26	57.5592	5.53965		25	65.3094	5.5771	113.774	27.5	82.7278	5.57615	120.223					8.6	43.3604	5.61114	98.2525	39.6	50.1776	5.69026	107.038	28.5	74.2083	5.5423	92.2062	25.1	77.2592	5.71858	114.867				#DIV/0!	50.6	41.1383			28.5
7.5	26.1	35.3125	5.66805	93.1635	29.7	71.6482	5.64526	121.132	26.1	57.2704	5.53885		25.1	64.1252	5.57642	112.59	27.6	82.0284	5.57599	119.524					8.7	43.8926	5.61055	98.7847	39.7	49.9973	5.68986	106.858	28.6	71.9755	5.5443	89.9734	25.2	77.8788	5.71783	115.486				#DIV/0!	50.7	41.1248			28.6
7.6	26.2	35.3338	5.66833	93.1848	29.8	71.2941	5.6452	120.778	26.2	58.8062	5.53843	107.271	25.2	64.0988	5.57696	112.563	27.7	79.8322	5.57513	117.328					8.8	44.5542	5.60944	99.4463	39.8	48.9594	5.68973	105.82	28.7	72.648	5.54454	90.6459	25.3	77.487	5.71776	115.095				#DIV/0!	50.8	42.6665			28.7
7.7	26.3	35.6059	5.66867	93.4569	29.9	70.0693	5.64473	119.553	26.3	58.1602	5.5394	106.625	25.3	63.1461	5.57755	111.611	27.8	78.3436	5.57651	115.839					8.9	44.0614	5.60893	98.9535	39.9	48.5274	5.68833	105.388	28.8	73.8641	5.54412	91.862	25.4	76.1481	5.71825	113.756				#DIV/0!	50.9	43.2259			28.8
7.8	26.4	34.6477	5.66864	92.4987	30	68.5062	5.64574	117.99	26.4	56.5546	5.54086	105.019	25.4	61.7586	5.57897	110.223	27.9	79.7134	5.57671	117.209					9	42.9724	5.60903	97.8645	40	49.3842	5.68764	106.245	28.9	75.9765	5.54477	93.9744	25.5	75.2592	5.717	112.867				#DIV/0!	51	43.0032			28.9
7.9	26.5	34.4326	5.66742	92.2836	30.1	68.0068	5.64515	117.49	26.5	57.2427	5.54098	105.707	25.5	61.2616	5.57926	109.726	28	78.6886	5.57557	116.184					9.1	41.5976	5.60793	96.4897	40.1	49.4968	5.68789	106.357	29	76.9877	5.54335	94.9856	25.6	75.4506	5.71729	113.058				#DIV/0!	51.1	42.7911			29
8	26.6	34.618	5.66659	92.469	30.2	68.7564	5.64524	118.24	26.6	57.7359	5.54043	106.201	25.6	59.1969	5.57998	107.662	28.1	78.2228	5.57327	115.718					9.2	41.0081	5.60846	95.9002	40.2	48.5126	5.68797	105.373	29.1	76.4056	5.54263	94.4035	25.7	75.9512	5.7179	113.559				#DIV/0!	51.2	46.4412			29.1
8.1	26.7	35.5242	5.6659	93.3752	30.3	69.9627	5.64619	119.446	26.7	56.7032	5.54027	105.168	25.7	59.0754	5.57883	107.54	28.2	79.2275	5.57179	116.723					9.3	41.8057	5.6084	96.6978	40.3	48.8475	5.68688	105.708	29.2	74.5679	5.54257	92.5658	25.8	75.6049	5.71768	113.213				#DIV/0!	51.3	49.2939			29.2
8.2	26.8	36.4154	5.66417	94.2664	30.4	70.0878	5.6456	119.571	26.8	57.3077	5.54112	105.772	25.8	60.3438	5.57794	108.808	28.3	78.9473	5.57102	116.443					9.4	43.0064	5.60747	97.8985	40.4	50.1921	5.68554	107.053	29.3	74.3554	5.5408	92.3533	25.9	74.6921	5.71692	112.3				#DIV/0!	51.4	47.7821			29.3
8.3	26.9	36.2106	5.66336	94.0616	30.5	70.2684	5.64504	119.752	26.9	56.095	5.54265	104.56	25.9	61.7918	5.57815	110.256	28.4	79.2103	5.57063	116.706					9.5	42.8971	5.60777	97.7892	40.5	50.0005	5.68561	106.861	29.4	76.2417	5.53951	94.2396	26	74.4109	5.71761	112.019				#DIV/0!	51.5	47.274			29.4
8.4	27	36.7513	5.66288	94.6023	30.6	71.0332	5.64438	120.517	27	53.911	5.54514	102.376	26	62.7003	5.57694	111.165	28.5	77.8272	5.57043	115.323					9.6	41.772	5.60815	96.6641	40.6	50.0205	5.68591	106.881	29.5	76.2861	5.53974	94.284	26.1	75.1144	5.71806	112.722				#DIV/0!	51.6	48.3552			29.5
8.5	27.1	36.8856	5.663	94.7366	30.7	71.0676	5.64447	120.551	27.1	55.3799	5.54585	103.845	26.1	62.2862	5.57644	110.751	28.6	77.984	5.57156	115.479					9.7	41.1838	5.60733	96.0759	40.7	50.3542	5.68627	107.215	29.6	75.6415	5.53989	93.6394	26.2	75.657	5.71744	113.265				#DIV/0!	51.7	49.7104			29.6
8.6	27.2	36.8144	5.66296	94.6654	30.8	70.9463	5.6445	120.43	27.2	57.047	5.54505	105.512	26.2	63.1045	5.5764	111.569	28.7	79.2163	5.57302	116.712					9.8	41.2209	5.60725	96.113	40.8	49.5971	5.68618	106.458	29.7	74.0616	5.53948	92.0595	26.3	74.5583	5.71741	112.166				#DIV/0!					29.7
8.7	27.3	37.003	5.66282	94.854	30.9	69.3686	5.6444	118.852	27.3	56.3065	5.54576	104.771	26.3	63.518	5.57713	111.983	28.8	78.6547	5.57308	116.15					9.9	41.3968	5.6072	96.2889	40.9	48.9801	5.68518	105.841	29.8	71.9745	5.54058	89.9724	26.4	73.6014	5.71891	111.209				#DIV/0!					29.8
8.8	27.4	37.1032	5.66247	94.9542	31	68.6921	5.64611	118.176	27.4	55.5786	5.54709	104.043	26.4	63.5188	5.57737	111.983	28.9	78.9963	5.57261	116.492					10	41.6303	5.60696	96.5224	41	49.8195	5.68505	106.68	29.9	72.5376	5.53993	90.5355	26.5	73.693	5.71943	111.301				#DIV/0!					29.9
8.9	27.5	36.765	5.6622	94.616	31.1	69.6137	5.64736	119.097	27.5	56.146	5.54789	104.611	26.5	64.2231	5.57764	112.688	29	79.6609	5.57191	117.156					10.1	41.8767	5.60695	96.7688	41.1	50.6158	5.6859	107.476	30	74.717	5.53887	92.7149	26.6	73.7932	5.71971	111.401				#DIV/0!					30
9	27.6	37.0731	5.66237	94.9241	31.2	69.8934	5.64733	119.377	27.6	54.8172	5.54804	103.282	26.6	64.1129	5.57721	112.578	29.1	77.9463	5.5717	115.442					10.2	42.3457	5.60668	97.2378	41.2	49.9347	5.68568	106.795	30.1	73.8356	5.53964	91.8335	26.7	74.1098	5.72019	111.717				#DIV/0!					30.1
9.1	27.7	37.5322	5.66293	95.3832	31.3	69.3806	5.64762	118.864	27.7	54.5258	5.54692	102.99	26.7	64.1629	5.57661	112.628	29.2	77.7135	5.57315	115.209					10.3	41.7045	5.60689	96.5966	41.3	49.725	5.68462	106.585	30.2	72.3106	5.54109	90.3085	26.8	76.3961	5.72011	114.004				#DIV/0!					30.2
9.2	27.8	36.0775	5.66288	93.9285	31.4	68.4666	5.64844	117.95	27.8	56.159	5.54622	104.624	26.8	65.0679	5.57604	113.533	29.3	78.8949	5.57461	116.39					10.4	41.1938	5.60778	96.0859	41.4	50.7064	5.68396	107.567	30.3	74.1175	5.54137	92.1154	26.9	74.4338	5.7232	112.041				#DIV/0!					30.3
9.3	27.9	35.9184	5.66104	93.7694	31.5	69.0917	5.64836	118.575	27.9	57.3271	5.547	105.792	26.9	64.4906	5.57625	112.955	29.4	77.7996	5.57471	115.295					10.5	42.2673	5.6082	97.1594	41.5	51.5822	5.68437	108.443	30.4	74.5747	5.53994	92.5726	27	70.1749	5.72827	107.783				#DIV/0!					30.4
9.4	28	36.6991	5.65959	94.5501	31.6	70.3529	5.64759	119.836	28	56.2995	5.54656	104.764	27	62.8755	5.57699	111.34	29.5	77.3897	5.5738	114.885					10.6	43.324	5.6074	98.2161	41.6	51.6429	5.68369	108.503	30.5	73.4842	5.53871	91.4821	27.1	73.0115	5.72854	110.619				#DIV/0!					30.5
9.5	28.1	35.5217	5.65893	93.3727	31.7	70.6517	5.64811	120.135	28.1	57.5118	5.54508	105.976	27.1	63.0597	5.57629	111.524	29.6	78.3323	5.57342	115.828					10.7	43.0238	5.60767	97.9159	41.7	51.4256	5.68298	108.286	30.6	74.418	5.53867	92.4159	27.2	75.3946	5.72473	113.002				#DIV/0!					30.6
9.6	28.2	35.6161	5.65976	93.4671	31.8	69.9501	5.64819	119.434	28.2	59.5395	5.54261	108.004	27.2	63.4656	5.57551	111.93	29.7	78.0351	5.57387	115.53					10.8	41.9559	5.60824	96.848	41.8	51.5642	5.68263	108.425	30.7	73.7961	5.53948	91.794	27.3	75.8752	5.72336	113.483				#DIV/0!					30.7
9.7	28.3	37.329	5.66079	95.18	31.9	69.9341	5.64748	119.418	28.3	58.747	5.54178	107.212	27.3	61.8775	5.575	110.342	29.8	77.0914	5.57453	114.587					10.9	41.1786	5.60769	96.0707	41.9	50.8958	5.6824	107.756	30.8	73.6468	5.54074	91.6447	27.4	77.4155	5.72165	115.023				#DIV/0!					30.8
9.8	28.4	36.8253	5.65964	94.6763	32	70.6638	5.64692	120.147	28.4	58.9743	5.5418	107.439	27.4	61.6262	5.57608	110.091	29.9	76.9595	5.5744	114.455					11	41.0311	5.60806	95.9232	42	50.0345	5.68299	106.895	30.9	74.9165	5.54205	92.9144	27.5	76.5421	5.72167	114.15				#DIV/0!					30.9
9.9	28.5	36.0148	5.65776	93.8658	32.1	70.2859	5.64709	119.769	28.5	59.6311	5.54205	108.096	27.5	61.0184	5.57705	109.483	30	76.1823	5.57442	113.678					11.1	40.6927	5.60831	95.5848	42.1	50.3573	5.68264	107.218	31	75.0018	5.54199	92.9997	27.6	75.0165	5.72291	112.624				#DIV/0!					31
10	28.6	37.2413	5.65705	95.0923	32.2	69.5732	5.64766	119.057	28.6	59.2312	5.54163	107.696	27.6	59.7971	5.57847	108.262	30.1	76.6831	5.57371	114.178					11.2	39.0998	5.6089	93.9919	42.2	51.1997	5.68195	108.06	31.1	73.8886	5.54199	91.8865	27.7	73.5336	5.72232	111.141				#DIV/0!					31.1
10.1	28.7	37.4173	5.65774	95.2683	32.3	69.1977	5.64751	118.681	28.7	58.9587	5.54079	107.423	27.7	59.1228	5.57892	107.587	30.2	78.0934	5.57264	115.589					11.3	39.6698	5.6078	94.5619	42.3	51.3594	5.68217	108.22	31.2	73.0706	5.54302	91.0685	27.8	72.2358	5.72394	109.843				#DIV/0!					31.2
10.2	28.8	36.1365	5.65814	93.9875	32.4	69.1678	5.64783	118.651	28.8	60.737	5.54031	109.202	27.8	58.9747	5.57995	107.439	30.3	78.3205	5.57272	115.816					11.4	40.2187	5.60617	95.1108	42.4	51.0585	5.68217	107.919	31.3	73.6562	5.54345	91.6541	27.9	72.6279	5.72413	110.236				#DIV/0!					31.3
10.3	28.9	35.3135	5.65705	93.1645	32.5	69.3257	5.64816	118.809	28.9	59.4697	5.54145	107.934	27.9	59.3978	5.58097	107.862	30.4	78.9873	5.57258	116.483					11.5	41.121	5.60499	96.0131	42.5	50.964	5.68182	107.824	31.4	73.2053	5.54328	91.2032	28	73.3096	5.72373	110.917				#DIV/0!					31.4
10.4	29	34.9572	5.65705	92.8082	32.6	69.6414	5.64826	119.125	29	56.2182	5.54366	104.683	28	58.4595	5.58145	106.924	30.5	78.6132	5.57304	116.109					11.6	43.3884	5.60294	98.2805	42.6	50.1389	5.68162	106.999	31.5	73.6273	5.54266	91.6252	28.1	73.0329	5.72418	110.641				#DIV/0!					31.5
10.5	29.1	34.083	5.65662	91.934	32.7	69.0586	5.64873	118.542	29.1	56.5086	5.54303	104.973	28.1	57.6904	5.5811	106.155	30.6	79.334	5.57377	116.829					11.7	43.2245	5.60314	98.1166	42.7	49.6405	5.68042	106.501	31.6	74.6837	5.54174	92.6816	28.2	71.182	5.72492	108.79				#DIV/0!					31.6
10.6	29.2	34.3867	5.65729	92.2377	32.8	67.9476	5.64979	117.431	29.2	55.9631	5.54221	104.428	28.2	57.2148	5.58153	105.679	30.7	79.5192	5.57531	117.015					11.8	41.6333	5.60351	96.5254	42.8	50.1649	5.67998	107.025	31.7	72.95	5.54166	90.9479	28.3	69.8338	5.72322	107.441				#DIV/0!					31.7
10.7	29.3	35.073	5.65838	92.924	32.9	68.0628	5.64976	117.546	29.3	54.5631	5.54077	103.028	28.3	58.2512	5.58156	106.716	30.8	78.5939	5.5764	116.089					11.9	41.3171	5.60218	96.2092	42.9	50.4793	5.68009	107.34	31.8	71.5071	5.54318	89.505	28.4	69.8597	5.72381	107.467				#DIV/0!					31.8
10.8	29.4	35.0838	5.65854	92.9348	33	68.549	5.6496	118.032	29.4	55.004	5.54083	103.469	28.4	59.0482	5.58059	107.513	30.9	78.0794	5.57681	115.575					12	42.7604	5.60133	97.6525	43	50.3494	5.67981	107.21	31.9	72.0895	5.54361	90.0874	28.5	72.0155	5.72456	109.623				#DIV/0!					31.9
10.9	29.5	34.6161	5.65874	92.4671	33.1	68.5857	5.64998	118.069	29.5	54.2677	5.54132	102.732	28.5	58.7668	5.58026	107.231	31	77.7572	5.57764	115.253					12.1	42.981	5.60196	97.8731	43.1	50.3392	5.67935	107.2	32	72.3053	5.54344	90.3032	28.6	73.6294	5.72212	111.237				#DIV/0!					32
11	29.6	33.3738	5.65948	91.2248	33.2	67.6108	5.65025	117.094	29.6	52.7968	5.54245	101.261	28.6	58.4686	5.58024	106.933	31.1	78.2423	5.5783	115.738					12.2	42.4354	5.60229	97.3275	43.2	49.9515	5.67896	106.812	32.1	73.2934	5.54343	91.2913	28.7	73.162	5.72136	110.77				#DIV/0!					32.1
11.1	29.7	32.9401	5.65879	90.7911	33.3	67.9917	5.64944	117.475	29.7	53.8091	5.54231	102.274	28.7	56.9122	5.57994	105.377	31.2	77.9439	5.57839	115.439					12.3	43.0205	5.60206	97.9126	43.3	48.9665	5.67807	105.827	32.2	73.4429	5.54252	91.4408	28.8	72.4453	5.72144	110.053				#DIV/0!					32.2
11.2	29.8	33.7801	5.65869	91.6311	33.4	69.5778	5.64834	119.061	29.8	55.5187	5.54123	103.983	28.8	57.2254	5.58116	105.69	31.3	76.6947	5.57821	114.19					12.4	43.8308	5.60122	98.7229	43.4	48.6504	5.67845	105.511	32.3	71.2143	5.54159	89.2122	28.9	71.9313	5.72053	109.539				#DIV/0!					32.3
11.3	29.9	33.6846	5.65959	91.5356	33.5	70.6578	5.64886	120.141	29.9	53.4552	5.54164	101.92	28.9	58.6365	5.58284	107.101	31.4	75.4894	5.57925	112.985					12.5	44.8269	5.60116	99.719	43.5	48.7067	5.6785	105.567	32.4	71.5503	5.54287	89.5482	29	72.0436	5.72055	109.651				#DIV/0!					32.4
11.4	30	32.4715	5.66052	90.3225	33.6	70.6106	5.64805	120.094	30	51.171	5.54396	99.6356	29	58.8028	5.58294	107.267	31.5	76.4282	5.57931	113.924					12.6	44.9017	5.60004	99.7938	43.6	49.0629	5.67849	105.923	32.5	72.5588	5.54465	90.5567	29.1	71.9377	5.72073	109.545				#DIV/0!					32.5
11.5	30.1	33.0756	5.66007	90.9266	33.7	69.6001	5.64703	119.084	30.1	51.6848	5.54437	100.149	29.1	59.3702	5.58322	107.835	31.6	78.0629	5.57847	115.558					12.7	44.5696	5.59887	99.4617	43.7	48.7851	5.67889	105.646	32.6	72.383	5.54522	90.3809	29.2	71.4024	5.72101	109.01				#DIV/0!					32.6
11.6	30.2	34.2662	5.65893	92.1172	33.8	69.9625	5.64735	119.446	30.2	52.8919	5.54425	101.357	29.2	58.5952	5.58292	107.06	31.7	78.5376	5.57904	116.033					12.8	44.3708	5.59818	99.2629	43.8	48.1041	5.67956	104.965	32.7	72.8678	5.54571	90.8657	29.3	71.2902	5.72062	108.898				#DIV/0!					32.7
11.7	30.3	33.9311	5.65912	91.7821	33.9	69.2686	5.64815	118.752	30.3	53.4851	5.54526	101.95	29.3	58.3965	5.58183	106.861	31.8	77.6125	5.57906	115.108					12.9	43.0018	5.59721	97.8939	43.9	48.574	5.67953	105.434	32.8	72.3078	5.54568	90.3057	29.4	72.0548	5.72047	109.662				#DIV/0!					32.8
11.8	30.4	32.872	5.65971	90.723	34	68.1717	5.6496	117.655	30.4	52.3365	5.54559	100.801	29.4	58.8645	5.58107	107.329	31.9	77.1576	5.5782	114.653					13	41.7519	5.59782	96.644	44	48.9204	5.67894	105.781	32.9	70.8773	5.54512	88.8752	29.5	71.145	5.72136	108.753				#DIV/0!					32.9
11.9	30.5	31.5924	5.65906	89.4434	34.1	68.3273	5.65005	117.811	30.5	52.7615	5.54485	101.226	29.5	58.0041	5.58066	106.469	32	78.4042	5.57792	115.9					13.1	41.8033	5.59714	96.6954	44.1	48.8943	5.67869	105.755	33	70.2228	5.54598	88.2207	29.6	69.0663	5.7233	106.674				#DIV/0!					33
12	30.6	31.9004	5.66002	89.7514	34.2	67.8119	5.65025	117.295	30.6	54.5848	5.54379	103.049	29.6	58.8478	5.58113	107.312	32.1	78.9952	5.57878	116.491					13.2	43.0318	5.59648	97.9239	44.2	48.3416	5.67849	105.202	33.1	70.5757	5.54636	88.5736	29.7	68.0547	5.72278	105.662				#DIV/0!					33.1
12.1	30.7	33.4268	5.66143	91.2778	34.3	67.4715	5.64988	116.955	30.7	55.768	5.54435	104.233	29.7	58.9625	5.58247	107.427	32.2	78.8931	5.57892	116.388					13.3	43.4854	5.59708	98.3775	44.3	47.9073	5.67763	104.768	33.2	71.6205	5.54635	89.6184	29.8	67.8398	5.7238	105.447				#DIV/0!					33.2
12.2	30.8	32.657	5.66086	90.508	34.4	67.88	5.64997	117.363	30.8	55.7196	5.54371	104.184	29.8	58.1718	5.58353	106.636	32.3	79.3783	5.579	116.874					13.4	42.9572	5.59712	97.8493	44.4	48.0746	5.67738	104.935	33.3	73.3401	5.54732	91.338	29.9	68.7684	5.72473	106.376				#DIV/0!					33.3
12.3	30.9	30.8455	5.65931	88.6965	34.5	67.8016	5.65055	117.285	30.9	54.918	5.54295	103.383	29.9	58.4524	5.58395	106.917	32.4	78.4888	5.5786	115.984					13.5	42.0496	5.5966	96.9417	44.5	48.1689	5.6773	105.029	33.4	74.0642	5.54653	92.0621	30	68.4456	5.72415	106.053				#DIV/0!					33.4
12.4	31	31.2528	5.66009	89.1038	34.6	67.2171	5.65112	116.701	31	55.5949	5.54304	104.06	30	58.2541	5.58405	106.719	32.5	77.172	5.57728	114.667					13.6	41.2174	5.5971	96.1095	44.6	48.4699	5.67712	105.33	33.5	72.3943	5.54629	90.3922	30.1	67.6583	5.72299	105.266				#DIV/0!					33.5
12.5	31.1	32.7946	5.66143	90.6456	34.7	68.0852	5.65111	117.569	31.1	55.7725	5.54378	104.237	30.1	58.8417	5.58397	107.306	32.6	77.5262	5.57743	115.022					13.7	40.7531	5.59677	95.6452	44.7	48.1032	5.67727	104.964	33.6	71.637	5.54765	89.6349	30.2	67.006	5.72319	104.614				#DIV/0!					33.6
12.6	31.2	33.8458	5.66078	91.6968	34.8	69.4857	5.65011	118.969	31.2	55.0186	5.54427	103.483	30.2	58.1554	5.58334	106.62	32.7	79.0839	5.57796	116.579					13.8	40.8543	5.59697	95.7464	44.8	47.1873	5.67782	104.048	33.7	72.2873	5.54851	90.2852	30.3	66.3867	5.72252	103.994				#DIV/0!					33.7
12.7	31.3	33.8268	5.66135	91.6778	34.9	70.3051	5.65053	119.789	31.3	55.0292	5.54409	103.494	30.3	57.7386	5.58196	106.203	32.8	78.6699	5.57691	116.165					13.9	40.9161	5.5973	95.8082	44.9	46.918	5.67738	103.778	33.8	71.3303	5.54862	89.3282	30.4	66.2041	5.72286	103.812				#DIV/0!					33.8
12.8	31.4	32.4056	5.66188	90.2566	35	70.7487	5.64993	120.232	31.4	56.0989	5.54393	104.564	30.4	59.3102	5.58115	107.775	32.9	76.8211	5.57528	114.316					14	40.4578	5.59753	95.3499	45	46.784	5.67731	103.644	33.9	70.4359	5.54786	88.4338	30.5	66.0817	5.72302	103.689				#DIV/0!					33.9
12.9	31.5	30.9313	5.66074	88.7823	35.1	70.3138	5.64974	119.797	31.5	56.6745	5.54477	105.139	30.5	60.3929	5.58176	108.858	33	77.8071	5.57568	115.302					14.1	39.7334	5.59729	94.6255	45.1	47.1533	5.67708	104.014	34	71.7126	5.54806	89.7105	30.6	65.9742	5.72332	103.582				#DIV/0!					34
13	31.6	30.3478	5.66149	88.1988	35.2	69.5801	5.65008	119.064	31.6	55.8783	5.54495	104.343	30.6	59.2762	5.58124	107.741	33.1	79.6854	5.57709	117.181					14.2	39.1617	5.59785	94.0538	45.2	47.604	5.67644	104.464	34.1	73.0083	5.54947	91.0062	30.7	64.9514	5.72353	102.559				#DIV/0!					34.1
13.1	31.7	30.6582	5.6616	88.5092	35.3	69.0437	5.64963	118.527	31.7	56.1373	5.5444	104.602	30.7	58.7962	5.57958	107.261	33.2	80.0422	5.57647	117.538					14.3	38.6144	5.59785	93.5065	45.3	47.8291	5.67624	104.69	34.2	72.1343	5.54946	90.1322	30.8	63.3145	5.72513	100.922				#DIV/0!					34.2
13.2	31.8	31.0451	5.66132	88.8961	35.4	69.4593	5.64989	118.943	31.8	56.4586	5.54366	104.923	30.8	59.5331	5.5786	107.998	33.3	78.4404	5.57608	115.936					14.4	38.3723	5.59844	93.2644	45.4	47.7359	5.67581	104.596	34.3	72.1399	5.54862	90.1378	30.9	63.8423	5.72476	101.45				#DIV/0!					34.3
13.3	31.9	32.349	5.66149	90.2	35.5	68.7169	5.65067	118.2	31.9	55.121	5.54315	103.586	30.9	59.1753	5.57819	107.64	33.4	76.6447	5.57728	114.14					14.5	39.3419	5.59883	94.234	45.5	47.5706	5.67521	104.431	34.4	72.9988	5.54791	90.9967	31	65.5305	5.72372	103.138				#DIV/0!					34.4
13.4	32	33.4823	5.66006	91.3333	35.6	67.3431	5.65216	116.827	32	55.4636	5.54397	103.928	31	59.3596	5.57818	107.824	33.5	77.6495	5.57698	115.145					14.6	40.0472	5.59813	94.9393	45.6	47.8372	5.67489	104.698	34.5	72.4585	5.54789	90.4564	31.1	66.4359	5.72483	104.044				#DIV/0!					34.5
13.5	32.1	32.6976	5.65986	90.5486	35.7	67.5881	5.65233	117.072	32.1	56.067	5.54523	104.532	31.1	58.9533	5.57834	107.418	33.6	79.5064	5.57577	117.002					14.7	39.1901	5.59813	94.0822	45.7	47.6813	5.67483	104.542	34.6	73.1654	5.54838	91.1633	31.2	66.627	5.72444	104.235				#DIV/0!					34.6
13.6	32.2	31.9184	5.66064	89.7694	35.8	67.3339	5.65219	116.817	32.2	55.9278	5.54575	104.392	31.2	58.193	5.57886	106.658	33.7	80.2457	5.57612	117.741					14.8	37.6895	5.59905	92.5816	45.8	48.0098	5.67496	104.87	34.7	74.3821	5.5496	92.38	31.3	66.4114	5.72423	104.019				#DIV/0!					34.7
13.7	32.3	30.4901	5.66054	88.3411	35.9	67.5616	5.65173	117.045	32.3	56.6527	5.5462	105.117	31.3	58.8605	5.57874	107.325	33.8	80.7962	5.5757	118.292					14.9	37.1377	5.59845	92.0298	45.9	48.2369	5.67549	105.097	34.8	73.7099	5.54949	91.7078	31.4	65.884	5.72437	103.492				#DIV/0!					34.8
13.8	32.4	29.506	5.66218	87.357	36	68.8532	5.65109	118.337	32.4	56.2749	5.5459	104.74	31.4	59.3808	5.57799	107.845	33.9	79.562	5.57574	117.057					15	37.6771	5.59849	92.5692	46	47.5432	5.67569	104.404	34.9	72.4195	5.54874	90.4174	31.5	66.2598	5.7238	103.867				#DIV/0!					34.9
13.9	32.5	30.8576	5.66276	88.7086	36.1	69.9944	5.65183	119.478	32.5	53.9886	5.5452	102.453	31.5	59.3707	5.57763	107.835	34	79.2655	5.57693	116.761					15.1	38.5272	5.59912	93.4193	46.1	46.8964	5.67511	103.757	35	71.5181	5.54931	89.516	31.6	66.0182	5.72282	103.626				#DIV/0!					35
14	32.6	31.9488	5.66165	89.7998	36.2	70.2407	5.65111	119.724	32.6	53.4698	5.54678	101.934	31.6	59.1506	5.57734	107.615	34.1	79.7154	5.57806	117.211					15.2	38.6327	5.59877	93.5248	46.2	46.6236	5.67536	103.484	35.1	72.6252	5.54913	90.6231	31.7	64.6597	5.72129	102.267				#DIV/0!					35.1
14.1	32.7	32.3256	5.66177	90.1766	36.3	69.7013	5.65054	119.185	32.7	53.6757	5.54805	102.14	31.7	57.5896	5.57679	106.054	34.2	78.6357	5.57855	116.131					15.3	38.3655	5.5985	93.2576	46.3	46.362	5.67531	103.222	35.2	73.1504	5.54794	91.1483	31.8	64.0514	5.72198	101.659				#DIV/0!					35.2
14.2	32.8	30.6582	5.66141	88.5092	36.4	68.712	5.6507	118.195	32.8	54.4864	5.54897	102.951	31.8	57.6466	5.5778	106.111	34.3	78.2218	5.57811	115.717					15.4	38.5479	5.59855	93.44	46.4	46.8864	5.67558	103.747	35.3	72.2088	5.54705	90.2067	31.9	64.334	5.72197	101.942				#DIV/0!					35.3
14.3	32.9	27.941	5.659	85.792	36.5	68.0943	5.64975	117.578	32.9	53.9444	5.55078	102.409	31.9	58.8915	5.57899	107.356	34.4	76.8061	5.57813	114.301					15.5	38.6913	5.5988	93.5834	46.5	46.4055	5.6765	103.266	35.4	72.8188	5.54718	90.8167	32	65.3664	5.72156	102.974				#DIV/0!					35.4
14.4	33	28.6627	5.66008	86.5137	36.6	68.0864	5.64968	117.57	33	52.0127	5.5529	100.477	32	58.6293	5.57885	107.094	34.5	77.4601	5.57681	114.955					15.6	39.3891	5.59887	94.2812	46.6	44.6033	5.67786	101.464	35.5	71.7328	5.5479	89.7307	32.1	66.0264	5.72251	103.634				#DIV/0!					35.5
14.5	33.1	33.1201	5.66212	90.9711	36.7	67.8787	5.64959	117.362	33.1	52.7004	5.55339	101.165	32.1	58.9828	5.57843	107.447	34.6	79.2463	5.57509	116.742					15.7	40.7622	5.5997	95.6543	46.7	43.7013	5.67728	100.562	35.6	70.8939	5.54953	88.8918	32.2	65.0501	5.72234	102.658				#DIV/0!					35.6
14.6	33.2	36.0919	5.65857	93.9429	36.8	68.7562	5.64975	118.24	33.2	53.8485	5.55314	102.313	32.2	60.2503	5.57773	108.715	34.7	79.1096	5.57477	116.605					15.8	41.2563	5.59896	96.1484	46.8	43.099	5.67782	99.9594	35.7	71.5892	5.55061	89.5871	32.3	64.2073	5.72076	101.815				#DIV/0!					35.7
14.7	33.3	34.5034	5.65828	92.3544	36.9	68.7334	5.65096	118.217	33.3	53.2124	5.554	101.677	32.3	60.3297	5.57815	108.794	34.8	77.8028	5.57464	115.298					15.9	40.1207	5.59868	95.0128	46.9	43.6118	5.67773	100.472	35.8	71.5922	5.55088	89.5901	32.4	63.8104	5.72069	101.418				#DIV/0!					35.8
14.8	33.4	33.3097	5.65993	91.1607	37	67.9692	5.65197	117.453	33.4	52.4651	5.55537	100.93	32.4	60.0169	5.57843	108.482	34.9	77.308	5.57324	114.803					16	38.8176	5.59966	93.7097	47	44.7504	5.67704	101.611	35.9	71.8886	5.55119	89.8865	32.5	64.5536	5.72005	102.161				#DIV/0!					35.9
14.9	33.5	33.231	5.6603	91.082	37.1	68.6135	5.65229	118.097	33.5	52.707	5.55617	101.172	32.5	61.5094	5.57846	109.974	35	77.7297	5.57255	115.225					16.1	39.1367	5.59932	94.0288	47.1	45.3714	5.6776	102.232	36	71.5508	5.55117	89.5487	32.6	65.7192	5.71851	103.327				#DIV/0!					36
15	33.6	32.4152	5.66073	90.2662	37.2	68.8008	5.6518	118.284	33.6	51.6476	5.55664	100.112	32.6	62.2001	5.57707	110.665	35.1	77.0922	5.57214	114.588					16.2	38.9983	5.59867	93.8904	47.2	45.1779	5.67737	102.038	36.1	72.5202	5.55084	90.5181	32.7	65.7706	5.71827	103.378				#DIV/0!					36.1
15.1	33.7	31.9664	5.6602	89.8174	37.3	69.4773	5.65144	118.961	33.7	51.3279	5.55613	99.7925	32.7	61.6372	5.57614	110.102	35.2	77.1645	5.57239	114.66					16.3	38.4718	5.59781	93.3639	47.3	44.9135	5.67688	101.774	36.2	73.0435	5.54964	91.0414	32.8	65.4829	5.718	103.091				#DIV/0!					36.2
15.2	33.8	32.5579	5.66027	90.4089	37.4	70.0068	5.65036	119.49	33.8	51.5437	5.55598	100.008	32.8	60.7919	5.57587	109.257	35.3	77.7774	5.57276	115.273					16.4	38.4368	5.5976	93.3289	47.4	44.2521	5.67676	101.113	36.3	70.9897	5.54874	88.9876	32.9	66.2064	5.71728	103.814				#DIV/0!					36.3
15.3	33.9	33.9443	5.66107	91.7953	37.5	69.7459	5.6497	119.229	33.9	50.7244	5.55604	99.189	32.9	61.1653	5.57476	109.63	35.4	80.0249	5.57249	117.52					16.5	38.0613	5.59732	92.9534	47.5	44.1299	5.67586	100.99	36.4	70.4468	5.54991	88.4447	33	67.3068	5.71571	104.914				#DIV/0!					36.4
15.4	34	32.0189	5.66011	89.8699	37.6	69.5364	5.64946	119.02	34	51.2916	5.55689	99.7562	33	63.2384	5.57345	111.703	35.5	80.6433	5.57428	118.139					16.6	37.7899	5.59748	92.682	47.6	44.6617	5.6752	101.522	36.5	71.654	5.55075	89.6519	33.1	66.7466	5.71533	104.354				#DIV/0!					36.5
15.5	34.1	30.0574	5.65672	87.9084	37.7	69.4857	5.64893	118.969	34.1	52.35	5.5584	100.815	33.1	63.7494	5.57391	112.214	35.6	79.5499	5.57518	117.045					16.7	37.5741	5.59737	92.4662	47.7	44.3386	5.67509	101.199	36.6	71.2339	5.55032	89.2318	33.2	65.6601	5.71579	103.268				#DIV/0!					36.6
15.6	34.2	32.2776	5.656	90.1286	37.8	70.4108	5.64856	119.894	34.2	51.6613	5.55869	100.126	33.2	63.0774	5.57383	111.542	35.7	79.2614	5.57521	116.757					16.8	37.4988	5.5975	92.3909	47.8	44.2564	5.67537	101.117	36.7	70.9298	5.54943	88.9277	33.3	65.9105	5.71487	103.518				#DIV/0!					36.7
15.7	34.3	33.6578	5.65787	91.5088	37.9	69.7785	5.64918	119.262	34.3	50.4969	5.55832	98.9615	33.3	61.1201	5.57311	109.585	35.8	78.1131	5.5755	115.608					16.9	37.1707	5.59755	92.0628	47.9	44.8101	5.67558	101.671	36.8	72.0971	5.54897	90.095	33.4	66.5691	5.71379	104.177				#DIV/0!					36.8
15.8	34.4	31.3991	5.65792	89.2501	38	67.7675	5.65041	117.251	34.4	51.0831	5.55915	99.5477	33.4	59.586	5.57433	108.051	35.9	76.8502	5.57475	114.346					17	37.9055	5.59796	92.7976	48	44.1745	5.67512	101.035	36.9	71.6937	5.54953	89.6916	33.5	65.2891	5.71339	102.897				#DIV/0!					36.9
15.9	34.5	29.7137	5.65524	87.5647	38.1	67.3177	5.64956	116.801	34.5	53.3534	5.56066	101.818	33.5	59.802	5.57426	108.267	36	76.7266	5.57533	114.222					17.1	38.1168	5.59919	93.0089	48.1	43.5287	5.67387	100.389	37	71.1966	5.55038	89.1945	33.6	63.548	5.71483	101.156				#DIV/0!					37
16	34.6	29.8207	5.65482	87.6717	38.2	68.8768	5.64937	118.36	34.6	54.1524	5.55973	102.617	33.6	59.807	5.574	108.272	36.1	77.8261	5.57588	115.321					17.2	37.2151	5.60008	92.1072	48.2	44.0804	5.67351	100.941	37.1	71.2439	5.55089	89.2418	33.7	63.7848	5.71417	101.392				#DIV/0!					37.1
16.1	34.7	31.0727	5.65449	88.9237	38.3	69.6776	5.65095	119.161	34.7	52.578	5.55949	101.043	33.7	60.2584	5.57371	108.723	36.2	78.0932	5.5753	115.589					17.3	37.1796	5.60008	92.0717	48.3	44.3705	5.67376	101.231	37.2	71.1728	5.55128	89.1707	33.8	64.8329	5.71333	102.441				#DIV/0!					37.2
16.2	34.8	33.6815	5.65269	91.5325	38.4	68.8508	5.65131	118.334	34.8	51.2873	5.56083	99.7519	33.8	60.423	5.57303	108.888	36.3	78.1823	5.57487	115.678					17.4	35.8992	5.60012	90.7913	48.4	43.8381	5.67363	100.699	37.3	71.3652	5.55167	89.3631	33.9	64.3942	5.71374	102.002				#DIV/0!					37.3
16.3	34.9	33.5759	5.65385	91.4269	38.5	69.4251	5.65079	118.909	34.9	52.701	5.56105	101.166	33.9	61.0256	5.57242	109.49	36.4	78.0087	5.57443	115.504					17.5	36.2077	5.59877	91.0998	48.5	43.2533	5.67288	100.114	37.4	70.5851	5.55182	88.583	34	64.2559	5.71468	101.864				#DIV/0!					37.4
16.4	35	33.5929	5.65502	91.4439	38.6	70.3349	5.6497	119.818	35	53.3989	5.55984	101.864	34	62.1355	5.57132	110.6	36.5	78.7869	5.57375	116.282					17.6	37.555	5.59721	92.4471	48.6	43.0323	5.67289	99.8927	37.5	71.2238	5.55125	89.2217	34.1	63.5334	5.71561	101.141				#DIV/0!					37.5
16.5	35.1	35.9434	5.65632	93.7944	38.7	69.4184	5.64945	118.902	35.1	53.0081	5.55918	101.473	34.1	63.3155	5.57112	111.78	36.6	78.936	5.57245	116.431					17.7	37.3685	5.59696	92.2606	48.7	44.2272	5.67264	101.088	37.6	72.1415	5.55017	90.1394	34.2	62.3478	5.71735	99.9555				#DIV/0!					37.6
16.6	35.2	35.8383	5.65469	93.6893	38.8	68.8091	5.6503	118.293	35.2	53.9901	5.55899	102.455	34.2	63.908	5.56983	112.373	36.7	77.6434	5.57107	115.139					17.8	37.7873	5.59693	92.6794	48.8	44.9919	5.67104	101.852	37.7	71.7215	5.54978	89.7194	34.3	62.8172	5.7178	100.425				#DIV/0!					37.7
16.7	35.3	34.8984	5.65276	92.7494	38.9	68.7603	5.65061	118.244	35.3	53.6444	5.55974	102.109	34.3	63.5943	5.56893	112.059	36.8	79.5036	5.57113	116.999					17.9	37.5548	5.59735	92.4469	48.9	44.2047	5.67014	101.065	37.8	71.6146	5.54985	89.6125	34.4	62.5585	5.71751	100.166				#DIV/0!					37.8
16.8	35.4	35.6938	5.65215	93.5448	39	68.363	5.65092	117.846	35.4	53.0514	5.56074	101.516	34.4	64.226	5.56844	112.691	36.9	80.3353	5.57296	117.831					18	37.221	5.59798	92.1131	49	44.158	5.67024	101.018	37.9	71.5883	5.54983	89.5862	34.5	61.7118	5.71681	99.3195				#DIV/0!					37.9
16.9	35.5	35.8853	5.65242	93.7363	39.1	69.4774	5.65082	118.961	35.5	53.4142	5.56128	101.879	34.5	65.1377	5.56847	113.602	37	80.222	5.57368	117.717					18.1	37.0525	5.59831	91.9446	49.1	45.038	5.6703	101.898	38	71.417	5.54984	89.4149	34.6	61.4744	5.71742	99.0821				#DIV/0!					38
17	35.6	34.9707	5.65243	92.8217	39.2	70.1231	5.64946	119.607	35.6	53.1126	5.56139	101.577	34.6	65.461	5.56765	113.926	37.1	78.8021	5.57442	116.297					18.2	36.661	5.59879	91.5531	49.2	44.925	5.66935	101.785	38.1	70.4614	5.54969	88.4593	34.7	61.7742	5.71782	99.3819				#DIV/0!					38.1
17.1	35.7	34.654	5.65137	92.505	39.3	69.4281	5.64859	118.912	35.7	51.1199	5.56121	99.5845	34.7	65.5464	5.56702	114.011	37.2	77.0021	5.57638	114.497					18.3	37.0207	5.59889	91.9128	49.3	44.6062	5.66814	101.467	38.2	70.9846	5.55046	88.9825	34.8	61.3366	5.71773	98.9443				#DIV/0!					38.2
17.2	35.8	35.4659	5.65077	93.3169	39.4	68.9945	5.64867	118.478	35.8	48.6587	5.56304	97.1233	34.8	65.9356	5.5664	114.4	37.3	78.1285	5.57696	115.624					18.4	36.7818	5.59859	91.6739	49.4	45.158	5.66745	102.018	38.3	73.2046	5.55184	91.2025	34.9	60.2027	5.71701	97.8104				#DIV/0!					38.3
17.3	35.9	36.055	5.65109	93.906	39.5	69.5062	5.64827	118.99	35.9	49.4373	5.56263	97.9019	34.9	66.5329	5.56606	114.998	37.4	79.2762	5.57638	116.772					18.5	37.2059	5.59801	92.098	49.5	44.7999	5.6673	101.66	38.4	73.6484	5.55091	91.6463	35	59.4	5.718	97.0077				#DIV/0!					38.4
17.4	36	35.3667	5.65067	93.2177	39.6	71.1805	5.64736	120.664	36	51.0697	5.56148	99.5343	35	65.9211	5.56521	114.386	37.5	80.3551	5.57678	117.85					18.6	37.8354	5.59703	92.7275	49.6	43.5583	5.66758	100.419	38.5	72.9003	5.55025	90.8982	35.1	59.6541	5.71807	97.2618				#DIV/0!					38.5
17.5	36.1	34.1991	5.6494	92.0501	39.7	71.0153	5.6482	120.499	36.1	51.7268	5.56182	100.191	35.1	64.1989	5.56367	112.664	37.6	79.7527	5.57609	117.248					18.7	37.4473	5.59663	92.3394	49.7	42.5572	5.66648	99.4176	38.6	72.7867	5.5504	90.7846	35.2	59.9277	5.71777	97.5354				#DIV/0!					38.6
17.6	36.2	34.7813	5.64964	92.6323	39.8	69.8697	5.64907	119.353	36.2	51.474	5.56147	99.9386	35.2	64.3235	5.56393	112.788	37.7	78.6982	5.57471	116.194					18.8	36.7622	5.59669	91.6543	49.8	42.5991	5.66664	99.4595	38.7	72.3407	5.55047	90.3386	35.3	60.14	5.7178	97.7477				#DIV/0!					38.7
17.7	36.3	35.3093	5.65058	93.1603	39.9	69.3444	5.64879	118.828	36.3	50.8332	5.56083	99.2978	35.3	64.9091	5.56435	113.374	37.8	78.7501	5.57456	116.245					18.9	36.4533	5.59601	91.3454	49.9	43.5815	5.66687	100.442	38.8	71.1525	5.55094	89.1504	35.4	59.7546	5.71753	97.3623				#DIV/0!					38.8
17.8	36.4	34.5155	5.6508	92.3665	40	68.8789	5.64916	118.362	36.4	50.9202	5.5609	99.3849	35.4	65.0649	5.56416	113.53	37.9	78.8857	5.57444	116.381					19	37.569	5.59573	92.4611	50	44.1167	5.66595	100.977	38.9	71.6046	5.55037	89.6025	35.5	61.1188	5.71668	98.7265				#DIV/0!					38.9
17.9	36.5	33.7354	5.65011	91.5864	40.1	69.7626	5.64906	119.246	36.5	51.5857	5.56106	100.05	35.5	65.4549	5.5641	113.92	38	78.3161	5.57421	115.811					19.1	38.113	5.59662	93.0051	50.1	43.1332	5.66554	99.9936	39	72.6643	5.54946	90.6622	35.6	61.9562	5.7141	99.5639				#DIV/0!					39
18	36.6	33.2014	5.65041	91.0524	40.2	70.7382	5.64797	120.222	36.6	51.2766	5.56054	99.7412	35.6	66.3042	5.56369	114.769	38.1	78.1639	5.5734	115.659					19.2	37.5902	5.59684	92.4823	50.2	42.5147	5.6663	99.3751	39.1	72.4288	5.54941	90.4267	35.7	61.1103	5.71218	98.718				#DIV/0!					39.1
18.1	36.7	33.9882	5.6501	91.8392	40.3	70.3581	5.64779	119.842	36.7	50.3976	5.55965	98.8622	35.7	66.8912	5.564	115.356	38.2	78.7559	5.57288	116.251					19.3	37.546	5.59652	92.4381	50.3	43.0218	5.66643	99.8822	39.2	72.2923	5.54958	90.2902	35.8	62.1603	5.71178	99.768				#DIV/0!					39.2
18.2	36.8	34.4924	5.64889	92.3434	40.4	69.4255	5.64808	118.909	36.8	50.9335	5.55974	99.3981	35.8	65.9251	5.56372	114.39	38.3	78.8277	5.57282	116.323					19.4	37.27	5.59627	92.1621	50.4	42.7129	5.66598	99.5733	39.3	72.242	5.54966	90.2399	35.9	62.5612	5.71274	100.169				#DIV/0!					39.3
18.3	36.9	35.2936	5.64816	93.1446	40.5	69.9045	5.64736	119.388	36.9	51.1645	5.56037	99.6291	35.9	63.4861	5.56251	111.951	38.4	79.9474	5.57271	117.443					19.5	37.5224	5.59571	92.4145	50.5	42.6746	5.66512	99.535	39.4	72.9525	5.54976	90.9504	36	61.7232	5.71297	99.3309				#DIV/0!					39.4
18.4	37	36.5749	5.64655	94.4259	40.6	71.0186	5.64623	120.502	37	49.7815	5.5607	98.2462	36	62.9327	5.56371	111.397	38.5	79.5149	5.57362	117.01					19.6	38.0487	5.59493	92.9408	50.6	43.2398	5.6644	100.1	39.5	71.4946	5.55056	89.4925	36.1	61.1193	5.71209	98.727				#DIV/0!					39.5
18.5	37.1	36.665	5.6463	94.516	40.7	70.096	5.64615	119.579	37.1	49.9717	5.55969	98.4363	36.1	63.5622	5.56457	112.027	38.6	78.2285	5.57479	115.724					19.7	37.4641	5.59465	92.3562	50.7	42.5202	5.66424	99.3806	39.6	70.053	5.5526	88.0509	36.2	61.3756	5.71221	98.9833				#DIV/0!					39.6
18.6	37.2	37.2438	5.64596	95.0948	40.8	69.4827	5.64714	118.966	37.2	50.5923	5.5586	99.057	36.2	61.9044	5.56473	110.369	38.7	76.4539	5.57494	113.949					19.8	37.2777	5.59501	92.1698	50.8	41.9021	5.66492	98.7625	39.7	71.3628	5.55359	89.3607	36.3	61.668	5.7127	99.2757				#DIV/0!					39.7
18.7	37.3	36.7628	5.64628	94.6138	40.9	69.382	5.64761	118.865	37.3	50.1847	5.55801	98.6493	36.3	60.4996	5.56338	108.964	38.8	74.8188	5.57675	112.314					19.9	37.6968	5.59521	92.5889	50.9	41.2239	5.66497	98.0843	39.8	71.7706	5.5532	89.7685	36.4	61.7338	5.71269	99.3415				#DIV/0!					39.8
18.8	37.4	35.408	5.64712	93.259	41	68.477	5.64811	117.96	37.4	49.6295	5.55788	98.0941	36.4	61.0379	5.5635	109.503	38.9	75.1264	5.5773	112.622					20	37.5138	5.59494	92.4059	51	40.3909	5.66578	97.2513	39.9	71.0561	5.55312	89.054	36.5	62.1792	5.71277	99.7869				#DIV/0!					39.9
18.9	37.5	35.9353	5.64646	93.7863	41.1	67.9611	5.64767	117.445	37.5	49.2173	5.5572	97.682	36.5	63.3823	5.56412	111.847	39	74.9469	5.57747	112.442					20.1	37.1478	5.59445	92.0399	51.1	39.9357	5.66574	96.7961	40	70.1237	5.55374	88.1216	36.6	62.3631	5.71223	99.9708				#DIV/0!					40
19	37.6	37.4311	5.64524	95.2821	41.2	67.7944	5.64789	117.278	37.6	51.6564	5.55699	100.121	36.6	65.3856	5.56251	113.85	39.1	75.8166	5.5775	113.312					20.2	37.773	5.5944	92.6651	51.2	39.6576	5.66622	96.518	40.1	71.1044	5.55357	89.1023	36.7	61.673	5.71183	99.2807				#DIV/0!					40.1
19.1	37.7	36.7303	5.64565	94.5813	41.3	68.5731	5.64797	118.057	37.7	53.7679	5.55917	102.233	36.7	64.0229	5.56252	112.488	39.2	76.4266	5.57669	113.922					20.3	38.6663	5.59501	93.5584	51.3	39.0545	5.66643	95.9149	40.2	72.8013	5.55249	90.7992	36.8	60.3972	5.71245	98.0049				#DIV/0!					40.2
19.2	37.8	34.8931	5.64685	92.7441	41.4	69.1444	5.64714	118.628	37.8	54.1742	5.559	102.639	36.8	61.7917	5.56378	110.256	39.3	76.5662	5.57633	114.062					20.4	38.7369	5.59461	93.629	51.4	37.8844	5.66731	94.7448	40.3	71.964	5.55285	89.9619	36.9	59.8003	5.71145	97.408				#DIV/0!					40.3
19.3	37.9	34.0179	5.646	91.8689	41.5	69.371	5.64681	118.854	37.9	53.9989	5.55921	102.464	36.9	60.8222	5.56315	109.287	39.4	76.1435	5.5759	113.639					20.5	37.6574	5.59424	92.5495	51.5	38.3639	5.66694	95.2243	40.4	69.8755	5.55395	87.8734	37	59.8472	5.71145	97.4549				#DIV/0!					40.4
19.4	38	34.6195	5.64626	92.4705	41.6	70.2514	5.64629	119.735	38	53.4934	5.55957	101.958	37	61.2229	5.5635	109.688	39.5	76.4803	5.57499	113.976					20.6	37.0026	5.59506	91.8947	51.6	48.0857	5.66606	104.946	40.5	68.1522	5.55323	86.1501	37.1	60.696	5.71151	98.3037				#DIV/0!					40.5
19.5	38.1	36.3361	5.64724	94.1871	41.7	71.2528	5.64667	120.736	38.1	54.6612	5.55948	103.126	37.1	61.534	5.56426	109.999	39.6	78.6383	5.57392	116.134					20.7	37.8174	5.59526	92.7095	51.7	52.3929	5.67618	109.253	40.6	68.1476	5.55426	86.1455	37.2	60.8012	5.71041	98.4089				#DIV/0!					40.6
19.6	38.2	36.8063	5.64612	94.6573	41.8	72.3642	5.64584	121.848	38.2	55.3692	5.55823	103.834	37.2	60.5872	5.56464	109.052	39.7	78.7875	5.57471	116.283					20.8	37.7875	5.59456	92.6796	51.8	51.1458	5.67997	108.006	40.7	70.7376	5.55543	88.7355	37.3	59.9573	5.70924	97.565				#DIV/0!					40.7
19.7	38.3	36.7913	5.64544	94.6423	41.9	71.9086	5.64612	121.392	38.3	54.812	5.55754	103.277	37.3	60.7329	5.56419	109.198	39.8	78.4102	5.57522	115.906					20.9	37.0506	5.59377	91.9427	51.9	52.8921	5.68283	109.753	40.8	72.5418	5.55397	90.5397	37.4	60.5554	5.70943	98.1631				#DIV/0!					40.8
19.8	38.4	37.4877	5.64484	95.3387	42	69.9585	5.64686	119.442	38.4	53.652	5.55747	102.117	37.4	62.0506	5.56367	110.515	39.9	78.8049	5.57546	116.3					21	36.9135	5.59384	91.8056	52	52.0195	5.68323	108.88	40.9	72.8546	5.55399	90.8525	37.5	59.6926	5.71048	97.3003				#DIV/0!					40.9
19.9	38.5	37.4645	5.645	95.3155	42.1	68.5769	5.64552	118.06	38.5	52.9389	5.55626	101.404	37.5	61.9332	5.56429	110.398	40	79.0853	5.57529	116.581					21.1	36.2587	5.59377	91.1508	52.1	51.6445	5.68265	108.505	41	72.6092	5.55371	90.6071	37.6	58.6502	5.7125	96.2579				#DIV/0!					41
20	38.6	35.8333	5.64517	93.6843	42.2	68.9473	5.646	118.431	38.6	54.3393	5.5559	102.804	37.6	61.291	5.56494	109.756	40.1	79.646	5.57535	117.141					21.2	36.1155	5.5944	91.0076	52.2	51.8659	5.6826	108.726	41.1	71.0223	5.55315	89.0202	37.7	58.5177	5.71347	96.1254				#DIV/0!					41.1
20.1	38.7	35.4439	5.64344	93.2949	42.3	69.3633	5.64698	118.847	38.7	55.0328	5.55687	103.497	37.7	61.4141	5.56509	109.879	40.2	78.8999	5.57487	116.395					21.3	36.8354	5.59494	91.7275	52.3	51.8016	5.6828	108.662	41.2	70.2009	5.55419	88.1988	37.8	57.3903	5.71444	94.998				#DIV/0!					41.2
20.2	38.8	36.9606	5.64234	94.8116	42.4	69.1172	5.64731	118.601	38.8	55.2213	5.55704	103.686	37.8	60.8548	5.5651	109.319	40.3	78.1158	5.57361	115.611					21.4	36.5205	5.59466	91.4126	52.4	51.7252	5.68305	108.586	41.3	70.8885	5.5546	88.8864	37.9	57.0111	5.71405	94.6188				#DIV/0!					41.3
20.3	38.9	37.3617	5.64289	95.2127	42.5	67.4696	5.64742	116.953	38.9	55.1477	5.55741	103.612	37.9	59.7588	5.56459	108.223	40.4	77.5186	5.57329	115.014					21.5	36.0605	5.59401	90.9526	52.5	52.1069	5.68325	108.967	41.4	71.5639	5.5543	89.5618	38	57.9301	5.71425	95.5378				#DIV/0!					41.4
20.4	39	37.236	5.64292	95.087	42.6	66.0364	5.6494	115.52	39	54.6248	5.55781	103.089	38	59.2438	5.56517	107.708	40.5	77.0433	5.57237	114.539					21.6	36.4589	5.59392	91.351	52.6	52.2123	5.68296	109.073	41.5	71.1085	5.5546	89.1064	38.1	57.536	5.71575	95.1437				#DIV/0!					41.5
20.5	39.1	37.3564	5.64281	95.2074	42.7	67.0079	5.65008	116.491	39.1	56.2954	5.55774	104.76	38.1	59.2008	5.56533	107.665	40.6	77.6947	5.57204	115.19					21.7	35.7611	5.59424	90.6532	52.7	52.687	5.68276	109.547	41.6	70.8068	5.55528	88.8047	38.2	56.1297	5.71752	93.7374				#DIV/0!					41.6
20.6	39.2	36.5413	5.64256	94.3923	42.8	68.0833	5.64952	117.567	39.2	57.1043	5.55603	105.569	38.2	58.9125	5.56552	107.377	40.7	77.5368	5.57228	115.032					21.8	35.4833	5.59528	90.3754	52.8	53.43	5.68203	110.29	41.7	71.6783	5.55578	89.6762	38.3	56.713	5.71766	94.3207				#DIV/0!					41.7
20.7	39.3	35.0364	5.64135	92.8874	42.9	68.4194	5.6501	117.903	39.3	55.3813	5.5549	103.846	38.3	58.3096	5.56547	106.774	40.8	78.2166	5.57262	115.712					21.9	35.9992	5.59611	90.8913	52.9	53.5653	5.68207	110.426	41.8	71.5967	5.55537	89.5946	38.4	57.6396	5.71697	95.2473				#DIV/0!					41.8
20.8	39.4	34.7582	5.642	92.6092	43	67.6175	5.65018	117.101	39.4	54.5136	5.5556	102.978	38.4	58.8626	5.56598	107.327	40.9	77.7825	5.57366	115.278					22	35.7378	5.59632	90.6299	53	53.2137	5.68194	110.074	41.9	70.8954	5.55482	88.8933	38.5	57.3666	5.71744	94.9743				#DIV/0!					41.9
20.9	39.5	36.0843	5.64238	93.9353	43.1	67.8969	5.64937	117.38	39.5	54.7316	5.55554	103.196	38.5	59.5426	5.56706	108.007	41	77.5136	5.57494	115.009					22.1	36.0906	5.59626	90.9827	53.1	53.3838	5.68138	110.244	42	70.6654	5.55502	88.6633	38.6	56.4963	5.7182	94.104				#DIV/0!					42
21	39.6	36.7123	5.64119	94.5633	43.2	70.1038	5.64838	119.587	39.6	55.0395	5.55527	103.504	38.6	58.474	5.56738	106.939	41.1	77.6596	5.57618	115.155					22.2	35.9042	5.59583	90.7963	53.2	54.4264	5.6807	111.287	42.1	71.8097	5.55504	89.8076	38.7	56.0483	5.71789	93.656				#DIV/0!					42.1
21.1	39.7	36.7973	5.64062	94.6483	43.3	69.676	5.64974	119.159	39.7	54.8678	5.55528	103.332	38.7	58.0125	5.56674	106.477	41.2	78.3357	5.57707	115.831					22.3	36.0933	5.59516	90.9854	53.3	54.3138	5.68115	111.174	42.2	72.9827	5.55396	90.9806	38.8	56.1092	5.71826	93.7169				#DIV/0!					42.2
21.2	39.8	36.3707	5.64	94.2217	43.4	67.7813	5.65135	117.265	39.8	54.8853	5.55545	103.35	38.8	58.3599	5.56661	106.825	41.3	79.4225	5.57875	116.918					22.4	36.9368	5.59435	91.8289	53.4	53.6725	5.68167	110.533	42.3	72.6563	5.55383	90.6542	38.9	55.0709	5.71878	92.6786				#DIV/0!					42.3
21.3	39.9	35.2627	5.63883	93.1137	43.5	68.5645	5.65106	118.048	39.9	55.0448	5.55566	103.509	38.9	60.1404	5.56679	108.605	41.4	77.8888	5.5791	115.384					22.5	37.0393	5.59436	91.9314	53.5	53.8264	5.68151	110.687	42.4	71.7696	5.55403	89.7675	39	53.0312	5.72064	90.6389				#DIV/0!					42.4
21.4	40	36.0374	5.63905	93.8884	43.6	69.3045	5.64992	118.788	40	55.6708	5.55568	104.135	39	60.5828	5.56529	109.047	41.5	77.478	5.57805	114.973					22.6	36.4596	5.59427	91.3517	53.6	53.7544	5.68119	110.615	42.5	70.8168	5.55341	88.8147	39.1	54.3069	5.71999	91.9146				#DIV/0!					42.5
21.5	40.1	37.1374	5.64018	94.9884	43.7	68.742	5.64943	118.225	40.1	56.7686	5.55633	105.233	39.1	60.7735	5.56401	109.238	41.6	76.706	5.57758	114.201					22.7	36.2772	5.59355	91.1693	53.7	54.2569	5.68074	111.117	42.6	70.5516	5.55379	88.5495	39.2	56.132	5.71768	93.7397				#DIV/0!					42.6
21.6	40.2	37.0554	5.63994	94.9064	43.8	68.9769	5.64967	118.46	40.2	57.0889	5.55581	105.554	39.2	62.4996	5.56272	110.964	41.7	75.9688	5.57628	113.464					22.8	36.5877	5.59309	91.4798	53.8	55.2701	5.67976	112.131	42.7	70.2991	5.55398	88.297	39.3	57.927	5.7175	95.5347				#DIV/0!					42.7
21.7	40.3	37.5924	5.63957	95.4434	43.9	68.1043	5.65023	117.588	40.3	56.6285	5.55554	105.093	39.3	62.6132	5.56285	111.078	41.8	77.3356	5.5759	114.831					22.9	36.4344	5.59292	91.3265	53.9	54.7606	5.67983	111.621	42.8	70.8113	5.55438	88.8092	39.4	58.9738	5.71486	96.5815				#DIV/0!					42.8
21.8	40.4	37.1076	5.63862	94.9586	44	66.3183	5.6517	115.802	40.4	56.3849	5.55576	104.85	39.4	62.2205	5.56286	110.685	41.9	77.6329	5.57675	115.128					23	37.2635	5.59293	92.1556	54	54.0227	5.68048	110.883	42.9	71.3712	5.55533	89.3691	39.5	59.1009	5.71318	96.7086				#DIV/0!					42.9
21.9	40.5	34.4692	5.63702	92.3202	44.1	66.3054	5.65136	115.789	40.5	55.8575	5.55577	104.322	39.5	62.2306	5.56251	110.695	42	78.2649	5.57718	115.76					23.1	37.5129	5.59382	92.405	54.1	53.9027	5.68037	110.763	43	70.6731	5.5556	88.671	39.6	60.9981	5.71164	98.6058				#DIV/0!					43
22	40.6	33.7321	5.6386	91.5831	44.2	67.98	5.6511	117.463	40.6	54.2351	5.55629	102.7	39.6	62.5121	5.56219	110.977	42.1	79.8881	5.57828	117.383					23.2	36.2787	5.59436	91.1708	54.2	53.9441	5.68042	110.805	43.1	68.7899	5.55524	86.7878	39.7	62.375	5.7124	99.9827				#DIV/0!					43.1
22.1	40.7	35.8078	5.63948	93.6588	44.3	67.9808	5.65273	117.464	40.7	52.6133	5.55528	101.078	39.7	62.5916	5.56209	111.056	42.2	80.9044	5.57764	118.4					23.3	36.1384	5.59364	91.0305	54.3	53.6934	5.68051	110.554	43.2	67.9841	5.55673	85.982	39.8	63.5771	5.71113	101.185				#DIV/0!					43.2
22.2	40.8	36.4896	5.63788	94.3406	44.4	66.2087	5.65406	115.692	40.8	52.2653	5.55599	100.73	39.8	62.1984	5.56193	110.663	42.3	80.9441	5.57786	118.439					23.4	37.3125	5.59313	92.2046	54.4	53.3978	5.6809	110.258	43.3	69.9369	5.55768	87.9348	39.9	63.8788	5.71125	101.486				#DIV/0!					43.3
22.3	40.9	35.8962	5.63692	93.7472	44.5	66.6216	5.65357	116.105	40.9	52.4229	5.55643	100.888	39.9	61.0655	5.56139	109.53	42.4	81.0723	5.57801	118.568					23.5	37.2405	5.59383	92.1326	54.5	53.0616	5.68099	109.922	43.4	71.5244	5.55661	89.5223	40	63.2771	5.71094	100.885				#DIV/0!					43.4
22.4	41	35.6524	5.63673	93.5034	44.6	67.3796	5.65269	116.863	41	53.5199	5.55667	101.985	40	60.4843	5.56196	108.949	42.5	81.3476	5.5783	118.843					23.6	36.2486	5.59454	91.1407	54.6	52.7674	5.68146	109.628	43.5	72.5543	5.5569	90.5522	40.1	63.1958	5.70974	100.803				#DIV/0!					43.5
22.5	41.1	34.3626	5.63624	92.2136	44.7	66.9971	5.65253	116.481	41.1	55.1934	5.55802	103.658	40.1	59.7114	5.56207	108.176	42.6	79.7826	5.57828	117.278					23.7	36.1425	5.59426	91.0346	54.7	52.9891	5.68165	109.85	43.6	72.6323	5.55615	90.6302	40.2	63.6775	5.70889	101.285				#DIV/0!					43.6
22.6	41.2	34.292	5.63728	92.143	44.8	66.1074	5.65285	115.591	41.2	55.6625	5.55755	104.127	40.2	59.1857	5.56287	107.65	42.7	78.3407	5.57676	115.836					23.8	36.8329	5.59412	91.725	54.8	52.8993	5.68156	109.76	43.7	72.2915	5.55537	90.2894	40.3	64.0075	5.70852	101.615				#DIV/0!					43.7
22.7	41.3	36.9528	5.63833	94.8038	44.9	64.8399	5.65219	114.323	41.3	53.7935	5.55749	102.258	40.3	60.2695	5.5633	108.734	42.8	78.1039	5.57687	115.599					23.9	37.8738	5.5947	92.7659	54.9	52.8408	5.68135	109.701	43.8	71.4619	5.55503	89.4598	40.4	64.2932	5.70778	101.901				#DIV/0!					43.8
22.8	41.4	39.2465	5.63622	97.0975	45	64.5516	5.65311	114.035	41.4	51.9536	5.55927	100.418	40.4	61.6037	5.56267	110.068	42.9	78.6214	5.57678	116.117					24	37.9686	5.59411	92.8607	55	52.7429	5.68123	109.603	43.9	69.8294	5.55385	87.8273	40.5	64.6032	5.70728	102.211				#DIV/0!					43.9
22.9	41.5	40.0267	5.63653	97.8777	45.1	66.1643	5.65385	115.648	41.5	52.368	5.55946	100.833	40.5	61.9178	5.56319	110.382	43	79.2124	5.57622	116.708					24.1	37.101	5.59357	91.9931	55.1	52.7999	5.68099	109.66	44	70.0098	5.5544	88.0077	40.6	64.6098	5.70646	102.217				#DIV/0!					44
23	41.6	40.6935	5.63591	98.5445	45.2	66.797	5.6526	116.28	41.6	52.4674	5.55921	100.932	40.6	62.035	5.56336	110.5	43.1	78.3758	5.57611	115.871					24.2	37.5734	5.59401	92.4655	55.2	53.22	5.68071	110.08	44.1	70.6297	5.55521	88.6276	40.7	64.8491	5.70548	102.457				#DIV/0!					44.1
23.1	41.7	40.1798	5.636	98.0308	45.3	66.9656	5.65186	116.449	41.7	52.6055	5.55903	101.07	40.7	62.0348	5.56365	110.499	43.2	78.4975	5.57682	115.993					24.3	38.6141	5.59499	93.5062	55.3	53.1578	5.68089	110.018	44.2	71.0865	5.55531	89.0844	40.8	65.2986	5.70438	102.906				#DIV/0!					44.2
23.2	41.8	38.5402	5.63666	96.3912	45.4	67.6979	5.65105	117.181	41.8	53.0963	5.55874	101.561	40.8	60.7014	5.56391	109.166	43.3	78.916	5.57777	116.411					24.4	38.5241	5.59476	93.4162	55.4	53.0027	5.68112	109.863	44.3	69.9586	5.55586	87.9565	40.9	66.2684	5.70366	103.876				#DIV/0!					44.3
23.3	41.9	38.3088	5.63551	96.1598	45.5	66.6458	5.65095	116.129	41.9	53.3718	5.55889	101.836	40.9	60.3114	5.56296	108.776	43.4	77.697	5.57816	115.192					24.5	38.6238	5.59442	93.5159	55.5	53.1077	5.68119	109.968	44.4	68.9767	5.5574	86.9746	41	66.6926	5.70179	104.3				#DIV/0!					44.4
23.4	42	39.0164	5.63474	96.8674	45.6	65.9515	5.65207	115.435	42	53.9599	5.55876	102.425	41	61.6486	5.5625	110.113	43.5	77.6219	5.57745	115.117					24.6	38.6578	5.59401	93.5499	55.6	52.9471	5.68114	109.808	44.5	69.7952	5.55823	87.7931	41.1	65.6738	5.7001	103.281				#DIV/0!					44.5
23.5	42.1	38.6264	5.63471	96.4774	45.7	66.743	5.6526	116.226	42.1	55.5336	5.55919	103.998	41.1	62.4311	5.56321	110.896	43.6	78.9847	5.57693	116.48					24.7	38.5247	5.59359	93.4168	55.7	54.0046	5.68088	110.865	44.6	70.7856	5.55816	88.7835	41.2	65.2062	5.70011	102.814				#DIV/0!					44.6
23.6	42.2	37.4899	5.63512	95.3409	45.8	66.4777	5.65211	115.961	42.2	57.2532	5.55801	105.718	41.2	62.0398	5.5631	110.504	43.7	79.0967	5.57762	116.592					24.8	39.473	5.59335	94.3651	55.8	55.2666	5.67941	112.127	44.7	71.4963	5.55902	89.4942	41.3	65.7535	5.69951	103.361				#DIV/0!					44.7
23.7	42.3	36.5808	5.63428	94.4318	45.9	66.1012	5.65124	115.585	42.3	55.9451	5.55838	104.41	41.3	60.3437	5.56262	108.808	43.8	77.4626	5.57808	114.958					24.9	39.4229	5.5941	94.315	55.9	55.4641	5.67922	112.325	44.8	70.4413	5.55906	88.4392	41.4	66.1151	5.6983	103.723				#DIV/0!					44.8
23.8	42.4	37.3666	5.63456	95.2176	46	66.1742	5.65095	115.658	42.4	55.7532	5.56	104.218	41.4	58.6757	5.56376	107.14	43.9	77.7698	5.57707	115.265					25	37.9568	5.59483	92.8489	56	55.1675	5.67882	112.028	44.9	69.2444	5.5581	87.2423	41.5	66.3855	5.69732	103.993				#DIV/0!					44.9
23.9	42.5	38.0167	5.63576	95.8677	46.1	66.3139	5.6507	115.797	42.5	54.7411	5.56163	103.206	41.5	59.3897	5.56351	107.854	44	79.1971	5.57594	116.692					25.1	37.5714	5.59407	92.4635	56.1	54.4322	5.67801	111.293	45	69.1862	5.55843	87.1841	41.6	66.1189	5.69618	103.727				#DIV/0!					45
24	42.6	37.377	5.6361	95.228	46.2	67.2338	5.65033	116.717	42.6	53.832	5.56407	102.297	41.6	60.6617	5.56263	109.126	44.1	78.9453	5.57597	116.441					25.2	38.3652	5.59378	93.2573	56.2	54.3909	5.67818	111.251	45.1	69.7374	5.55876	87.7353	41.7	66.8029	5.69447	104.411				#DIV/0!					45.1
24.1	42.7	36.7005	5.63575	94.5515	46.3	66.7656	5.65096	116.249	42.7	52.0065	5.5659	100.471	41.7	60.1844	5.56282	108.649	44.2	79.109	5.57623	116.604					25.3	38.1414	5.59432	93.0335	56.3	54.9373	5.67833	111.798	45.2	69.8544	5.55851	87.8523	41.8	67.6743	5.6922	105.282				#DIV/0!					45.2
24.2	42.8	36.5218	5.6362	94.3728	46.4	65.9491	5.65201	115.433	42.8	50.065	5.56934	98.5296	41.8	60.8672	5.56341	109.332	44.3	78.1911	5.57669	115.686					25.4	38.0054	5.59505	92.8975	56.4	54.9381	5.67782	111.799	45.3	69.3575	5.55833	87.3554	41.9	67.1523	5.69061	104.76				#DIV/0!					45.3
24.3	42.9	36.0228	5.63649	93.8738	46.5	65.836	5.65231	115.319	42.9	52.8063	5.57122	101.271	41.9	61.9062	5.56472	110.371	44.4	75.7911	5.57794	113.286					25.5	39.0767	5.5957	93.9688	56.5	55.0258	5.67723	111.886	45.4	68.3743	5.55865	86.3722	42	68.2494	5.69002	105.857				#DIV/0!					45.4
24.4	43	34.8118	5.63733	92.6628	46.6	65.1529	5.65269	114.636	43	52.0842	5.57009	100.549	42	60.9237	5.56489	109.388	44.5	76.0654	5.57713	113.561					25.6	38.864	5.59514	93.7561	56.6	55.3101	5.67663	112.171	45.5	68.5812	5.55809	86.5791	42.1	67.6191	5.69073	105.227				#DIV/0!					45.5
24.5	43.1	34.5638	5.63685	92.4148	46.7	66.226	5.65235	115.709	43.1	51.6533	5.56809	100.118	42.1	60.4629	5.56418	108.928	44.6	78.079	5.57619	115.574					25.7	38.4211	5.5943	93.3132	56.7	55.7613	5.67626	112.622	45.6	70.63	5.55741	88.6279	42.2	66.8187	5.69212	104.426				#DIV/0!					45.6
24.6	43.2	35.5055	5.63671	93.3565	46.8	66.9317	5.65082	116.415	43.2	51.8733	5.56676	100.338	42.2	59.6218	5.56399	108.086	44.7	78.7052	5.577	116.201					25.8	39.2065	5.59401	94.0986	56.8	55.612	5.67543	112.472	45.7	71.1749	5.55858	89.1728	42.3	66.3511	5.69274	103.959				#DIV/0!					45.7
24.7	43.3	36.3418	5.63763	94.1928	46.9	65.8998	5.64984	115.383	43.3	51.8681	5.5655	100.333	42.3	60.4191	5.56299	108.884	44.8	77.8662	5.57708	115.362					25.9	39.6261	5.59453	94.5182	56.9	55.5201	5.67429	112.381	45.8	70.2689	5.55906	88.2668	42.4	67.1608	5.69385	104.768				#DIV/0!					45.8
24.8	43.4	36.5025	5.6375	94.3535	47	66.0943	5.65022	115.578	43.4	52.766	5.56439	101.231	42.4	62.6102	5.56139	111.075	44.9	77.4453	5.57637	114.941					26	38.9145	5.59456	93.8066	57	56.4786	5.67343	113.339	45.9	71.3678	5.55873	89.3657	42.5	68.6374	5.69624	106.245				#DIV/0!					45.9
24.9	43.5	35.0358	5.63754	92.8868	47.1	66.002	5.65089	115.485	43.5	51.6458	5.56405	100.11	42.5	62.5289	5.5616	110.994	45	79.1884	5.57619	116.684					26.1	38.033	5.59382	92.9251	57.1	56.3659	5.67355	113.226	46	71.6914	5.55741	89.6893	42.6	68.0984	5.69621	105.706				#DIV/0!					46
25	43.6	33.3825	5.63926	91.2335	47.2	65.7426	5.65154	115.226	43.6	51.3561	5.56488	99.8207	42.6	61.9946	5.56185	110.459	45.1	80.0801	5.57763	117.575					26.2	38.6239	5.5941	93.516	57.2	55.8949	5.67379	112.755	46.1	69.9606	5.55619	87.9585	42.7	68.2145	5.69545	105.822				#DIV/0!					46.1
25.1	43.7	33.9688	5.63924	91.8198	47.3	65.2248	5.65202	114.708	43.7	51.404	5.56551	99.8687	42.7	62.7641	5.56164	111.229	45.2	79.0848	5.57797	116.58					26.3	38.6207	5.59503	93.5128	57.3	55.1176	5.67351	111.978	46.2	69.9004	5.5568	87.8983	42.8	68.1615	5.6947	105.769				#DIV/0!					46.2
25.2	43.8	33.9299	5.63854	91.7809	47.4	63.5017	5.65301	112.985	43.8	49.7547	5.56602	98.2193	42.8	62.4684	5.56076	110.933	45.3	78.0421	5.57742	115.537					26.4	37.6415	5.59588	92.5336	57.4	54.4859	5.67418	111.346	46.3	69.889	5.55746	87.8869	42.9	67.4797	5.69372	105.087				#DIV/0!					46.3
25.3	43.9	34.6675	5.63773	92.5185	47.5	63.5455	5.65217	113.029	43.9	49.0307	5.56493	97.4954	42.9	62.3061	5.55948	110.771	45.4	76.3565	5.57796	113.852					26.5	37.5979	5.59576	92.49	57.5	54.5385	5.67422	111.399	46.4	68.8331	5.55802	86.831	43	67.1851	5.69384	104.793				#DIV/0!					46.4
25.4	44	36.3139	5.63615	94.1649	47.6	63.951	5.65143	113.434	44	49.2909	5.56469	97.7555	43	63.4715	5.55852	111.936	45.5	75.9779	5.57699	113.473					26.6	37.9609	5.5957	92.853	57.6	54.9097	5.67419	111.77	46.5	69.3173	5.55766	87.3152	43.1	66.3148	5.6936	103.922				#DIV/0!					46.5
25.5	44.1	35.8456	5.63631	93.6966	47.7	62.9885	5.65102	112.472	44.1	48.3843	5.56468	96.849	43.1	64.5195	5.5585	112.984	45.6	76.1785	5.57654	113.674					26.7	38.3022	5.59602	93.1943	57.7	54.3529	5.67458	111.213	46.6	70.8629	5.5569	88.8608	43.2	65.2468	5.69454	102.854				#DIV/0!					46.6
25.6	44.2	35.056	5.63699	92.907	47.8	62.285	5.6518	111.768	44.2	48.2692	5.56559	96.7338	43.2	66.1164	5.55752	114.581	45.7	76.4639	5.5762	113.959					26.8	38.7081	5.59594	93.6002	57.8	53.3186	5.67556	110.179	46.7	69.4916	5.55749	87.4895	43.3	65.4012	5.69428	103.009				#DIV/0!					46.7
25.7	44.3	33.2808	5.63683	91.1318	47.9	62.4719	5.6519	111.955	44.3	48.6506	5.56648	97.1152	43.3	67.313	5.55787	115.778	45.8	77.1597	5.57565	114.655					26.9	38.7607	5.59629	93.6528	57.9	53.3847	5.67549	110.245	46.8	67.8481	5.5593	85.846	43.4	65.4189	5.69386	103.027				#DIV/0!					46.8
25.8	44.4	32.0512	5.63872	89.9022	48	62.9843	5.65176	112.468	44.4	49.2168	5.56689	97.6814	43.4	68.0122	5.55708	116.477	45.9	78.314	5.57567	115.809					27	38.6008	5.59656	93.4929	58	54.273	5.67535	111.133	46.9	68.6921	5.55981	86.69	43.5	64.4331	5.69338	102.041				#DIV/0!					46.9
25.9	44.5	31.9398	5.63936	89.7908	48.1	63.6888	5.65219	113.172	44.5	49.4323	5.56791	97.8969	43.5	68.1609	5.55681	116.626	46	79.6711	5.57459	117.166					27.1	39.8719	5.59667	94.764	58.1	54.6508	5.67622	111.511	47	69.858	5.55944	87.8559	43.6	64.6259	5.69429	102.234				#DIV/0!					47
26	44.6	31.6144	5.64008	89.4654	48.2	64.8156	5.65173	114.299	44.6	48.007	5.5686	96.4716	43.6	66.7882	5.55645	115.253	46.1	79.2815	5.5746	116.777					27.2	40.2478	5.59541	95.1399	58.2	53.5878	5.67652	110.448	47.1	70.2662	5.56012	88.2641	43.7	64.7739	5.69562	102.382				#DIV/0!					47.1
26.1	44.7	31.6159	5.64048	89.4669	48.3	64.4491	5.6525	113.933	44.7	47.6569	5.56792	96.1215	43.7	65.7077	5.55479	114.172	46.2	79.4642	5.57499	116.96					27.3	39.352	5.59443	94.2441	58.3	52.7292	5.67563	109.59	47.2	69.4113	5.56031	87.4092	43.8	63.04	5.6965	100.648				#DIV/0!					47.2
26.2	44.8	31.5615	5.64084	89.4125	48.4	62.9321	5.65356	112.416	44.8	47.8094	5.56767	96.274	43.8	67.0462	5.55433	115.511	46.3	80.6516	5.57561	118.147					27.4	39.1434	5.59451	94.0355	58.4	52.8902	5.67586	109.751	47.3	67.1363	5.5597	85.1342	43.9	64.6197	5.69527	102.227				#DIV/0!					47.3
26.3	44.9	30.6155	5.64118	88.4665	48.5	62.1619	5.65305	111.645	44.9	47.5974	5.56755	96.062	43.9	66.7349	5.55502	115.2	46.4	82.0632	5.575	119.559					27.5	39.1636	5.59437	94.0557	58.5	53.2385	5.67631	110.099	47.4	67.1216	5.56137	85.1195	44	64.7744	5.6922	102.382				#DIV/0!					47.4
26.4	45	30.4256	5.64258	88.2766	48.6	62.0718	5.65351	111.555	45	47.0463	5.56766	95.5109	44	65.6344	5.5559	114.099	46.5	82.5656	5.57562	120.061					27.6	38.8454	5.59422	93.7375	58.6	53.8557	5.6763	110.716	47.5	68.8371	5.56328	86.835	44.1	64.3281	5.68874	101.936				#DIV/0!					47.5
26.5	45.1	31.323	5.64387	89.174	48.7	63.676	5.65395	113.159	45.1	47.3796	5.56722	95.8442	44.1	65.4503	5.5559	113.915	46.6	81.9266	5.57565	119.422					27.7	38.3713	5.59372	93.2634	58.7	54.1545	5.677	111.015	47.6	69.807	5.56324	87.8049	44.2	65.8587	5.68652	103.466				#DIV/0!					47.6
26.6	45.2	30.8396	5.64401	88.6906	48.8	64.5947	5.65245	114.078	45.2	48.7664	5.5665	97.231	44.2	65.865	5.55607	114.33	46.7	82.0217	5.57508	119.517					27.8	38.6216	5.59377	93.5137	58.8	52.8938	5.67725	109.754	47.7	69.9269	5.56414	87.9248	44.3	65.4232	5.68585	103.031				#DIV/0!					47.7
26.7	45.3	30.6573	5.64361	88.5083	48.9	63.4555	5.65176	112.939	45.3	48.5285	5.56709	96.9931	44.3	64.8012	5.55664	113.266	46.8	82.008	5.57453	119.503					27.9	38.2414	5.59409	93.1335	58.9	52.0452	5.67607	108.906	47.8	68.5256	5.56477	86.5235	44.4	64.4293	5.68587	102.037				#DIV/0!					47.8
26.8	45.4	30.0403	5.64344	87.8913	49	63.2062	5.65251	112.69	45.4	47.368	5.56785	95.8327	44.4	63.4254	5.5581	111.89	46.9	82.0936	5.57386	119.589					28	37.823	5.59479	92.7151	59	52.1786	5.67604	109.039	47.9	68.5557	5.56415	86.5536	44.5	62.7081	5.68461	100.316				#DIV/0!					47.9
26.9	45.5	28.7154	5.64255	86.5664	49.1	62.5945	5.65309	112.078	45.5	47.2127	5.56753	95.6773	44.5	64.293	5.5585	112.758	47	82.5735	5.57323	120.069					28.1	38.5908	5.59512	93.4829	59.1	52.4935	5.67617	109.354	48	69.3901	5.56359	87.388	44.6	62.0294	5.6858	99.6371				#DIV/0!					48
27	45.6	28.4925	5.64327	86.3435	49.2	61.2609	5.65428	110.744	45.6	46.8236	5.5674	95.2882	44.6	63.7069	5.55806	112.172	47.1	81.726	5.57294	119.221					28.2	38.811	5.59459	93.7031	59.2	52.8628	5.67591	109.723	48.1	68.9169	5.56375	86.9148	44.7	62.3477	5.68634	99.9554				#DIV/0!					48.1
27.1	45.7	29.0426	5.64378	86.8936	49.3	61.4456	5.65412	110.929	45.7	46.3968	5.56686	94.8614	44.7	63.2396	5.55703	111.704	47.2	81.2447	5.5735	118.74					28.3	39.5729	5.59424	94.465	59.3	52.9212	5.67605	109.782	48.2	69.0838	5.56435	87.0817	44.8	62.7106	5.68637	100.318				#DIV/0!					48.2
27.2	45.8	29.5038	5.64361	87.3548	49.4	62.489	5.65378	111.972	45.8	46.3413	5.56682	94.8059	44.8	63.8532	5.55655	112.318	47.3	81.8469	5.57371	119.342					28.4	39.5004	5.59311	94.3925	59.4	53.0072	5.6761	109.868	48.3	70.6292	5.5652	88.6271	44.9	60.9171	5.68687	98.5248				#DIV/0!					48.3
27.3	45.9	29.9003	5.64397	87.7513	49.5	62.7071	5.65458	112.191	45.9	46.0619	5.56671	94.5265	44.9	64.4575	5.55658	112.922	47.4	81.9986	5.57331	119.494					28.5	38.0728	5.5918	92.9649	59.5	52.984	5.67626	109.844	48.4	70.676	5.56442	88.6739	45	58.4357	5.68959	96.0434				#DIV/0!					48.4
27.4	46	29.9494	5.64384	87.8004	49.6	62.0512	5.655	111.535	46	46.7032	5.5669	95.1678	45	64.5682	5.55605	113.033	47.5	80.7784	5.57298	118.274					28.6	37.6774	5.59213	92.5695	59.6	52.4896	5.67642	109.35	48.5	69.6398	5.56356	87.6377	45.1	58.8281	5.68959	96.4358				#DIV/0!					48.5
27.5	46.1	29.8104	5.64375	87.6614	49.7	62.9816	5.65472	112.465	46.1	47.7469	5.56775	96.2115	45.1	63.0308	5.55555	111.495	47.6	80.3719	5.57386	117.867					28.7	37.3812	5.59207	92.2733	59.7	52.2434	5.67603	109.104	48.6	69.5867	5.56384	87.5846	45.2	59.7799	5.68908	97.3876				#DIV/0!					48.6
27.6	46.2	30.0379	5.64384	87.8889	49.8	63.8687	5.6534	113.352	46.2	48.574	5.56746	97.0386	45.2	61.907	5.55651	110.372	47.7	80.097	5.57451	117.592					28.8	37.3801	5.59233	92.2722	59.8	52.4477	5.67598	109.308	48.7	68.2357	5.56411	86.2336	45.3	59.9817	5.68971	97.5894				#DIV/0!					48.7
27.7	46.3	29.1723	5.64419	87.0233	49.9	64.2751	5.65289	113.759	46.3	48.214	5.56797	96.6786	45.3	60.5581	5.55658	109.023	47.8	79.823	5.57531	117.318					28.9	37.3634	5.59261	92.2555	59.9	52.2886	5.67617	109.149	48.8	67.2533	5.56565	85.2512	45.4	59.039	5.68997	96.6467				#DIV/0!					48.8
27.8	46.4	28.4945	5.64552	86.3455	50	63.8474	5.652	113.331	46.4	46.6424	5.56879	95.107	45.4	58.7393	5.55786	107.204	47.9	80.8416	5.57599	118.337					29	37.7209	5.59288	92.613	60	52.0264	5.67651	108.887	48.9	68.3787	5.56647	86.3766	45.5	59.2678	5.68905	96.8755				#DIV/0!					48.9
27.9	46.5	28.9835	5.64617	86.8345	50.1	63.3178	5.65045	112.801	46.5	45.7557	5.56811	94.2203	45.5	59.5029	5.55765	107.968	48	81.5537	5.57558	119.049					29.1	38.4982	5.59356	93.3903	60.1	52.5388	5.6766	109.399	49	69.2541	5.56607	87.252	45.6	60.369	5.68799	97.9767				#DIV/0!					49
28	46.6	29.6424	5.64619	87.4934	50.2	63.5985	5.64978	113.082	46.6	45.3565	5.56839	93.8211	45.6	61.0932	5.55677	109.558	48.1	81.38	5.57578	118.875					29.2	39.5229	5.59335	94.415	60.2	51.9854	5.67608	108.846	49.1	70.5828	5.56645	88.5807	45.7	60.7696	5.68818	98.3773				#DIV/0!					49.1
28.1	46.7	29.4842	5.64698	87.3352	50.3	64.5049	5.64932	113.988	46.7	45.5368	5.5683	94.0014	45.7	60.4919	5.55722	108.957	48.2	81.1772	5.5761	118.673					29.3	40.4501	5.59421	95.3422	60.3	51.0658	5.67483	107.926	49.2	71.1856	5.56548	89.1835	45.8	61.035	5.68781	98.6427				#DIV/0!					49.2
28.2	46.8	27.8691	5.64789	85.7201	50.4	65.908	5.6479	115.391	46.8	45.9779	5.56804	94.4425	45.8	59.4641	5.55816	107.929	48.3	82.2062	5.57629	119.702					29.4	39.4931	5.59399	94.3852	60.4	51.3204	5.67483	108.181	49.3	70.337	5.56495	88.3349	45.9	61.1411	5.68771	98.7488				#DIV/0!					49.3
28.3	46.9	27.188	5.64698	85.039	50.5	66.4091	5.64784	115.893	46.9	43.9221	5.5682	92.3867	45.9	60.3633	5.55829	108.828	48.4	82.4073	5.57547	119.903					29.5	37.8503	5.59273	92.7424	60.5	51.4912	5.67513	108.352	49.4	70.0204	5.56532	88.0183	46	60.6069	5.6875	98.2146				#DIV/0!					49.4
28.4	47	28.2979	5.64694	86.1489	50.6	66.2429	5.64721	115.726	47	41.9641	5.57042	90.4287	46	60.6973	5.55758	109.162	48.5	81.8627	5.57469	119.358					29.6	37.5328	5.59334	92.4249	60.6	51.6112	5.67518	108.472	49.5	70.1675	5.56545	88.1654	46.1	59.9343	5.68656	97.542				#DIV/0!					49.5
28.5	47.1	28.1875	5.64819	86.0385	50.7	66.7686	5.64629	116.252	47.1	41.0413	5.57088	89.5059	46.1	61.2311	5.55709	109.696	48.6	81.748	5.57457	119.243					29.7	37.8123	5.59367	92.7044	60.7	51.1866	5.67539	108.047	49.6	69.7884	5.56541	87.7863	46.2	59.529	5.68665	97.1367				#DIV/0!					49.6
28.6	47.2	27.4051	5.64948	85.2561	50.8	67.3738	5.64493	116.857	47.2	40.6187	5.57223	89.0833	46.2	61.8209	5.55617	110.286	48.7	82.6572	5.57432	120.153					29.8	37.2539	5.59367	92.146	60.8	51.0448	5.67605	107.905	49.7	69.0287	5.565	87.0266	46.3	59.7662	5.68624	97.3739				#DIV/0!					49.7
28.7	47.3	27.7704	5.64995	85.6214	50.9	65.839	5.64401	115.322	47.3	40.9578	5.57328	89.4224	46.3	62.695	5.55567	111.16	48.8	82.7785	5.57326	120.274					29.9	37.6073	5.59308	92.4994	60.9	51.5451	5.67665	108.406	49.8	68.7858	5.56539	86.7837	46.4	60.7883	5.68559	98.396				#DIV/0!					49.8
28.8	47.4	27.4671	5.64994	85.3181	51	64.8163	5.645	114.3	47.4	41.2531	5.57387	89.7177	46.4	63.4439	5.55445	111.909	48.9	81.4016	5.57212	118.897					30	39.1424	5.59216	94.0345	61	52.0317	5.67658	108.892	49.9	69.6416	5.56561	87.6395	46.5	61.5946	5.68615	99.2023				#DIV/0!					49.9
28.9	47.5	26.7001	5.64958	84.5511	51.1	65.4305	5.645	114.914	47.5	41.5848	5.57484	90.0494	46.5	64.0076	5.55374	112.472	49	81.7846	5.57247	119.28					30.1	39.8511	5.59278	94.7432	61.1	52.014	5.67706	108.874	50	69.7327	5.56496	87.7306	46.6	61.284	5.68557	98.8917				#DIV/0!					50
29	47.6	27.0976	5.65015	84.9486	51.2	66.1455	5.6443	115.629	47.6	41.7247	5.57536	90.1893	46.6	64.3793	5.55261	112.844	49.1	83.019	5.57326	120.514					30.2	39.9697	5.59259	94.8618	61.2	51.0844	5.6775	107.945	50.1	69.1165	5.56429	87.1144	46.7	60.5799	5.68448	98.1876				#DIV/0!					50.1
29.1	47.7	27.2282	5.65124	85.0792	51.3	65.6738	5.64429	115.157	47.7	42.8536	5.57608	91.3182	46.7	64.6338	5.55167	113.098	49.2	83.2905	5.57274	120.786					30.3	39.3703	5.59251	94.2624	61.3	49.8787	5.67692	106.739	50.2	69.6409	5.56433	87.6388	46.8	61.3961	5.68449	99.0038				#DIV/0!					50.2
29.2	47.8	25.8522	5.65208	83.7032	51.4	64.3846	5.64482	113.868	47.8	42.7159	5.57557	91.1805	46.8	65.4194	5.55063	113.884	49.3	83.3881	5.57238	120.883					30.4	38.7539	5.59308	93.646	61.4	50.0739	5.67782	106.934	50.3	69.7772	5.56488	87.7751	46.9	61.8608	5.68555	99.4685				#DIV/0!					50.3
29.3	47.9	26.3374	5.65136	84.1884	51.5	64.4342	5.64398	113.918	47.9	42.4566	5.57486	90.9212	46.9	64.3908	5.55014	112.855	49.4	84.1241	5.57199	121.619					30.5	39.2422	5.59304	94.1343	61.5	50.2523	5.67907	107.113	50.4	70.4402	5.56521	88.4381	47	61.775	5.68582	99.3827				#DIV/0!					50.4
29.4	48	27.6932	5.65011	85.5442	51.6	64.9829	5.64322	114.466	48	43.3362	5.57449	91.8008	47	64.4593	5.55065	112.924	49.5	84.0663	5.57223	121.562					30.6	39.8414	5.59249	94.7335	61.6	49.5855	5.67995	106.446	50.5	71.3287	5.56624	89.3266	47.1	61.2143	5.68603	98.822				#DIV/0!					50.5
29.5	48.1	28.0515	5.65038	85.9025	51.7	65.3137	5.64296	114.797	48.1	44.2742	5.57498	92.7388	47.1	63.3691	5.55128	111.834	49.6	82.3601	5.57248	119.855					30.7	39.5115	5.59253	94.4036	61.7	49.8524	5.68015	106.713	50.6	70.9275	5.56624	88.9254	47.2	60.3484	5.68692	97.9561				#DIV/0!					50.6
29.6	48.2	28.2657	5.6502	86.1167	51.8	65.7082	5.64236	115.192	48.2	43.8368	5.57446	92.3014	47.2	62.2363	5.5528	110.701	49.7	81.2161	5.57116	118.711					30.8	39.2592	5.59291	94.1513	61.8	50.2315	5.68002	107.092	50.7	70.6199	5.56586	88.6178	47.3	59.8405	5.68685	97.4482				#DIV/0!					50.7
29.7	48.3	29.0641	5.65026	86.9151	51.9	64.9485	5.64212	114.432	48.3	41.6031	5.57344	90.0677	47.3	64.0251	5.5535	112.49	49.8	82.277	5.57116	119.772					30.9	39.14	5.59306	94.0321	61.9	50.3367	5.68032	107.197	50.8	69.5544	5.56583	87.5523	47.4	59.7758	5.68745	97.3835				#DIV/0!					50.8
29.8	48.4	29.1455	5.64937	86.9965	52	64.4347	5.64277	113.918	48.4	41.0898	5.57481	89.5544	47.4	64.0405	5.5525	112.505	49.9	83.3063	5.57215	120.802					31	37.97	5.59332	92.8621	62	49.8748	5.68045	106.735	50.9	68.8043	5.56476	86.8022	47.5	59.8925	5.68808	97.5002				#DIV/0!					50.9
29.9	48.5	28.5468	5.6485	86.3978	52.1	63.8492	5.64295	113.333	48.5	41.9908	5.57578	90.4554	47.5	63.5561	5.55138	112.021	50	82.6368	5.57199	120.132					31.1	36.5917	5.59236	91.4838	62.1	49.4405	5.68005	106.301	51	69.7455	5.56458	87.7434	47.6	59.9653	5.68844	97.573				#DIV/0!					51
30	48.6	29.7463	5.64841	87.5973	52.2	63.1859	5.64376	112.669	48.6	41.4861	5.57574	89.9507	47.6	65.164	5.55085	113.629	50.1	82.1697	5.57118	119.665					31.2	36.1787	5.59296	91.0708	62.2	49.4644	5.68022	106.325	51.1	71.8704	5.5653	89.8683	47.7	59.9837	5.68896	97.5914				#DIV/0!					51.1
30.1	48.7	31.1881	5.64973	89.0391	52.3	63.9078	5.64396	113.391	48.7	41.1152	5.57516	89.5798	47.7	66.2344	5.55168	114.699	50.2	83.9837	5.57094	121.479					31.3	36.8743	5.59317	91.7664	62.3	49.5228	5.68044	106.383	51.2	72.6926	5.56384	90.6905	47.8	59.6632	5.68937	97.2709				#DIV/0!					51.2
30.2	48.8	32.3633	5.64923	90.2143	52.4	64.6188	5.64331	114.102	48.8	41.5428	5.57503	90.0074	47.8	66.1507	5.55144	114.615	50.3	84.1444	5.57237	121.64					31.4	37.5155	5.59262	92.4076	62.4	48.4871	5.68056	105.348	51.3	72.5493	5.56293	90.5472	47.9	59.3167	5.68943	96.9244				#DIV/0!					51.3
30.3	48.9	33.2687	5.65008	91.1197	52.5	64.4888	5.64335	113.972	48.9	41.2951	5.57532	89.7597	47.9	64.2575	5.55109	112.722	50.4	81.5783	5.57339	119.074					31.5	38.0422	5.5927	92.9343	62.5	48.3157	5.67948	105.176	51.4	72.8531	5.56232	90.851	48	58.692	5.68993	96.2997				#DIV/0!					51.4
30.4	49	34.3451	5.64978	92.1961	52.6	64.3708	5.64354	113.854	49	39.1817	5.57584	87.6463	48	62.5022	5.55249	110.967	50.5	81.6108	5.57217	119.106					31.6	38.477	5.59221	93.3691	62.6	49.4476	5.67874	106.308	51.5	72.3541	5.56189	90.352	48.1	58.1869	5.68971	95.7946				#DIV/0!					51.5
30.5	49.1	33.9525	5.65073	91.8035	52.7	64.1152	5.64362	113.599	49.1	38.7803	5.57423	87.2449	48.1	61.3397	5.55249	109.804	50.6	83.0186	5.57114	120.514					31.7	38.998	5.59214	93.8901	62.7	49.5675	5.67924	106.428	51.6	72.5845	5.56202	90.5824	48.2	57.7035	5.69018	95.3112				#DIV/0!					51.6
30.6	49.2	32.2053	5.65205	90.0563	52.8	63.4416	5.64398	112.925	49.2	39.1778	5.57318	87.6424	48.2	61.0211	5.55353	109.486	50.7	82.7077	5.57125	120.203					31.8	39.6024	5.59153	94.4945	62.8	48.0954	5.67952	104.956	51.7	72.6526	5.56239	90.6505	48.3	57.1116	5.6901	94.7193				#DIV/0!					51.7
30.7	49.3	31.5972	5.65142	89.4482	52.9	63.6778	5.64363	113.161	49.3	37.9844	5.57244	86.449	48.3	60.0068	5.55443	108.471	50.8	82.2923	5.57163	119.788					31.9	39.5205	5.59149	94.4126	62.9	47.8691	5.67812	104.73	51.8	71.8119	5.56263	89.8098	48.4	56.5727	5.69081	94.1804				#DIV/0!					51.8
30.8	49.4	30.5659	5.65156	88.4169	53	64.1011	5.64307	113.585				48.4646	48.4	59.2885	5.55612	107.753	50.9	82.5253	5.57169	120.021					32	39.0845	5.59155	93.9766				56.8604	51.9	71.1814	5.5621	89.1793	48.5	56.7722	5.69094	94.3799				#DIV/0!					51.9
30.9	49.5	30.7064	5.65049	88.5574	53.1	63.9704	5.6429	113.454				48.4646	48.5	60.783	5.55738	109.248	51	82.0556	5.57152	119.551					32.1	39.0535	5.59116	93.9456				56.8604	52	70.6576	5.56226	88.6555	48.6	57.4677	5.69078	95.0754				#DIV/0!					52
31	49.6	32.2728	5.64935	90.1238	53.2	62.747	5.64291	112.23				48.4646	48.6	62.1568	5.55713	110.621	51.1	82.271	5.57088	119.766					32.2	39.7162	5.59083	94.6083				56.8604	52.1	71.7284	5.56194	89.7263	48.7	57.9602	5.6915	95.5679				#DIV/0!					52.1
31.1	49.7	33.0469	5.64995	90.8979	53.3	63.2376	5.64153	112.721				48.4646	48.7	62.539	5.55808	111.004	51.2	83.1802	5.57015	120.676					32.3	40.0717	5.59118	94.9638				56.8604	52.2	72.9167	5.56064	90.9146	48.8	57.5923	5.69146	95.2				#DIV/0!					52.2
31.2	49.8	32.2314	5.64959	90.0824	53.4	64.6787	5.63982	114.162				48.4646	48.8	61.7186	5.55857	110.183	51.3	81.6087	5.57014	119.104					32.4	39.7211	5.59111	94.6132				56.8604	52.3	72.0045	5.56027	90.0024	48.9	58.7476	5.69093	96.3553				#DIV/0!					52.3
31.3	49.9	31.8392	5.64823	89.6902	53.5	63.3343	5.63945	112.818				48.4646	48.9	61.7553	5.55837	110.22	51.4	80.8593	5.5716	118.355					32.5	38.7118	5.59066	93.6039				56.8604	52.4	70.2832	5.56084	88.2811	49	60.456	5.68899	98.0637				#DIV/0!					52.4
31.4	50	32.5847	5.64746	90.4357	53.6	62.058	5.64065	111.541				48.4646	49	61.2569	5.55817	109.722	51.5	82.8237	5.57262	120.319					32.6	38.1364	5.59133	93.0285				56.8604	52.5	69.577	5.55984	87.5749	49.1	60.4034	5.68892	98.0111				#DIV/0!					52.5
31.5	50.1	32.6385	5.64749	90.4895	53.7	62.7952	5.64062	112.279				48.4646	49.1	61.3589	5.55748	109.824	51.6	82.9141	5.57161	120.409					32.7	38.9296	5.59145	93.8217				56.8604	52.6	70.5853	5.55968	88.5832	49.2	60.3012	5.68892	97.9089				#DIV/0!					52.6
31.6	50.2	32.2772	5.64745	90.1282	53.8	63.3978	5.63975	112.881				48.4646	49.2	62.2374	5.55679	110.702	51.7	81.4921	5.5705	118.987					32.8	40.0407	5.59072	94.9328				56.8604	52.7	72.0027	5.56046	90.0006	49.3	59.6616	5.6888	97.2693				#DIV/0!					52.7
31.7	50.3	35.2546	5.64699	93.1056	53.9	63.2128	5.63943	112.696				48.4646	49.3	62.9461	5.5568	111.411	51.8	81.6811	5.57093	119.176					32.9	40.1913	5.5911	95.0834				56.8604	52.8	70.8065	5.55975	88.8044	49.4	59.1793	5.68953	96.787				#DIV/0!					52.8
31.8	50.4	36.7136	5.64306	94.5646	54	63.5526	5.63937	113.036				48.4646	49.4	63.0917	5.55617	111.556	51.9	83.4108	5.5716	120.906					33	40.1564	5.59128	95.0485				56.8604	52.9	68.8963	5.55777	86.8942	49.5	58.0054	5.68976	95.6131				#DIV/0!					52.9
31.9	50.5	33.6306	5.64047	91.4816	54.1	62.7059	5.63968	112.189				48.4646	49.5	62.5021	5.5556	110.967	52	83.5173	5.57053	121.013					33.1	39.5819	5.59144	94.474				56.8604	53	68.9319	5.55794	86.9298	49.6	56.9818	5.69148	94.5895				#DIV/0!					53
32	50.6	34.164	5.64169	92.015	54.2	60.6209	5.64088	110.104				48.4646	49.6	62.5757	5.55563	111.04	52.1	82.1742	5.56937	119.67					33.2	38.2095	5.59219	93.1016				56.8604	53.1	69.4584	5.55816	87.4563	49.7	58.0836	5.69215	95.6913				#DIV/0!					53.1
32.1	50.7	34.8444	5.64365	92.6954	54.3	59.6706	5.63994	109.154				48.4646	49.7	63.0694	5.55573	111.534	52.2	81.891	5.56967	119.386					33.3	37.792	5.59156	92.6841				56.8604	53.2	70.878	5.55784	88.8759	49.8	58.9698	5.69128	96.5775				#DIV/0!					53.2
32.2	50.8	33.716	5.64463	91.567	54.4	59.8188	5.64021	109.302				48.4646	49.8	63.9454	5.55537	112.41	52.3	82.5158	5.56976	120.011					33.4	38.6391	5.59143	93.5312				56.8604	53.3	71.0216	5.55884	89.0195	49.9	58.5911	5.69141	96.1988				#DIV/0!					53.3
32.3	50.9	32.6267	5.64439	90.4777	54.5	60.6712	5.64069	110.155				48.4646	49.9	62.854	5.55576	111.319	52.4	82.6131	5.56924	120.108					33.5	39.164	5.59219	94.0561				56.8604	53.4	69.7518	5.55954	87.7497	50	58.183	5.692	95.7907				#DIV/0!					53.4
32.4	51	32.8544	5.64544	90.7054	54.6	60.9343	5.64013	110.418				48.4646	50	60.7464	5.55709	109.211	52.5	82.6039	5.56873	120.099					33.6	38.721	5.59231	93.6131				56.8604	53.5	69.1213	5.55913	87.1192	50.1	57.9667	5.69217	95.5744				#DIV/0!					53.5
32.5	51.1	32.8273	5.64685	90.6783	54.7	59.7952	5.63979	109.279				48.4646	50.1	60.8795	5.55667	109.344	52.6	82.4587	5.56832	119.954					33.7	38.8627	5.59198	93.7548				56.8604	53.6	68.5862	5.55939	86.5841	50.2	57.2226	5.69259	94.8303				#DIV/0!					53.6
32.6	51.2	31.3315	5.64817	89.1825	54.8	58.9321	5.64077	108.416				48.4646	50.2	62.902	5.55618	111.367	52.7	81.8343	5.5677	119.33					33.8	39.2048	5.59153	94.0969				56.8604	53.7	69.1906	5.55917	87.1885	50.3	56.3854	5.69211	93.9931				#DIV/0!					53.7
32.7	51.3	30.8247	5.64784	88.6757	54.9	58.5893	5.64094	108.073				48.4646	50.3	62.4163	5.55747	110.881	52.8	80.6652	5.56777	118.161					33.9	39.4426	5.5914	94.3347				56.8604	53.8	70.251	5.55841	88.2489				37.6077				#DIV/0!					53.8
32.8	51.4	30.6165	5.64814	88.4675	55	58.0487	5.64147	107.532				48.4646	50.4	60.3394	5.55902	108.804	52.9	81.6762	5.56676	119.172					34	39.9635	5.59103	94.8556				56.8604	53.9	70.4397	5.55855	88.4376				37.6077				#DIV/0!					53.9
32.9	51.5	31.4187	5.64821	89.2697	55.1	58.1004	5.64147	107.584				48.4646	50.5	60.8428	5.55889	109.307	53	84.5487	5.56499	122.044					34.1	41.351	5.59118	96.2431				56.8604	54	70.3939	5.55848	88.3918				37.6077				#DIV/0!					54
33	51.6	31.077	5.64733	88.928	55.2	58.2455	5.64141	107.729				48.4646	50.6	60.1456	5.55831	108.61	53.1	83.2489	5.56556	120.744					34.2	41.7924	5.58984	96.6845				56.8604	54.1	68.8023	5.55837	86.8002				37.6077				#DIV/0!					54.1
33.1	51.7	30.1113	5.64598	87.9623	55.3	58.9233	5.64151	108.407				48.4646	50.7	59.6606	5.55703	108.125	53.2	82.1141	5.56724	119.609					34.3	41.2058	5.58883	96.0979				56.8604	54.2	68.231	5.55979	86.2289				37.6077				#DIV/0!					54.2
33.2	51.8	30.2646	5.64587	88.1156	55.4	59.9816	5.64083	109.465				48.4646	50.8	61.1201	5.55635	109.585	53.3	83.7978	5.56816	121.293					34.4	41.0437	5.58854	95.9358				56.8604	54.3	70.2206	5.56088	88.2185				37.6077				#DIV/0!					54.3
33.3	51.9	30.4444	5.64593	88.2954	55.5	59.222	5.64123	108.705				48.4646	50.9	63.0215	5.5569	111.486	53.4	83.5959	5.56735	121.091					34.5	39.5273	5.58806	94.4194				56.8604	54.4	71.5537	5.55989	89.5516				37.6077				#DIV/0!					54.4
33.4				57.851	55.6	58.2909	5.64243	107.774				48.4646	51	62.487	5.55566	110.952	53.5	82.3312	5.5662	119.827					34.6	38.475	5.58922	93.3671				56.8604	54.5	70.0384	5.56003	88.0363				37.6077				#DIV/0!					54.5
33.5				57.851	55.7	57.7979	5.64276	107.281				48.4646	51.1	60.7853	5.55378	109.25	53.6	82.3007	5.56644	119.796					34.7	38.4989	5.58938	93.391				56.8604	54.6	68.5735	5.5616	86.5714				37.6077				#DIV/0!					54.6
33.6				57.851	55.8	56.9571	5.6436	106.441				48.4646	51.2	61.2176	5.55367	109.682	53.7	83.3056	5.56668	120.801					34.8	38.6881	5.5895	93.5802				56.8604	54.7	69.8378	5.562	87.8357				37.6077				#DIV/0!					54.7
33.7				57.851	55.9	57.5067	5.64361	106.99				48.4646	51.3	61.8974	5.55394	110.362	53.8	84.1463	5.56595	121.642					34.9	37.9584	5.58982	92.8505				56.8604	54.8	71.288	5.56112	89.2859				37.6077				#DIV/0!					54.8
33.8				57.851	56	58.2831	5.64299	107.767				48.4646	51.4	61.8405	5.55356	110.305	53.9	84.0666	5.56587	121.562					35	36.8886	5.59089	91.7807				56.8604	54.9	71.2346	5.5615	89.2325				37.6077				#DIV/0!					54.9
33.9				57.851	56.1	58.7638	5.64317	108.247				48.4646	51.5	61.6523	5.55308	110.117	54	83.1722	5.56588	120.668					35.1	37.9747	5.59093	92.8668				56.8604	55	70.8096	5.56186	88.8075				37.6077				#DIV/0!					55
34				57.851	56.2	59.5064	5.64277	108.99				48.4646	51.6	62.0202	5.55282	110.485	54.1	83.591	5.56506	121.086					35.2	39.804	5.5898	94.6961				56.8604	55.1	70.9165	5.56188	88.9144				37.6077				#DIV/0!					55.1
34.1				57.851	56.3	60.0043	5.64315	109.488				48.4646	51.7	63.4706	5.55287	111.935	54.2	84.2075	5.564	121.703					35.3	39.1446	5.59051	94.0367				56.8604	55.2	71.11	5.56179	89.1079				37.6077				#DIV/0!					55.2
34.2				57.851	56.4	60.1435	5.64291	109.627				48.4646	51.8	63.6434	5.55161	112.108	54.3	83.5444	5.56332	121.04					35.4	37.6693	5.59185	92.5614				56.8604	55.3	69.9457	5.56188	87.9436				37.6077				#DIV/0!					55.3
34.3				57.851	56.5	59.3524	5.64279	108.836				48.4646	51.9	63.987	5.55034	112.452	54.4	84.7446	5.56337	122.24					35.5	37.9644	5.59175	92.8565				56.8604	55.4	68.912	5.56307	86.9099				37.6077				#DIV/0!					55.4
34.4				57.851	56.6	58.7737	5.64358	108.257				48.4646	52	65.8182	5.54892	114.283	54.5	84.5457	5.56453	122.041					35.6	38.8978	5.59135	93.7899				56.8604	55.5	69.6598	5.56346	87.6577				37.6077				#DIV/0!					55.5
34.5				57.851	56.7	58.9082	5.64383	108.392				48.4646	52.1	65.2968	5.54895	113.761	54.6	83.7858	5.56567	121.281					35.7	38.9911	5.5919	93.8832				56.8604	55.6	69.4211	5.56306	87.419				37.6077				#DIV/0!					55.6
34.6				57.851	56.8	58.2706	5.6439	107.754				48.4646	52.2	63.844	5.54944	112.309	54.7	84.6146	5.56631	122.11					35.8	38.259	5.5923	93.1511				56.8604	55.7	67.6311	5.56236	85.629				37.6077				#DIV/0!					55.7
34.7				57.851	56.9	58.5842	5.64325	108.068				48.4646	52.3	62.4159	5.5487	110.881	54.8	84.5581	5.56607	122.053					35.9	38.6074	5.59196	93.4995				56.8604	55.8	66.0785	5.56351	84.0764				37.6077				#DIV/0!					55.8
34.8				57.851	57	59.8589	5.64234	109.342				48.4646	52.4	61.9112	5.54933	110.376	54.9	83.8104	5.56573	121.306					36	38.9273	5.59128	93.8194				56.8604	55.9	66.7514	5.56332	84.7493				37.6077				#DIV/0!					55.9
34.9				57.851	57.1	59.4855	5.64274	108.969				48.4646	52.5	60.9684	5.54959	109.433	55	82.4176	5.56615	119.913					36.1	37.4704	5.59087	92.3625				56.8604	56	68.428	5.5625	86.4259				37.6077				#DIV/0!					56
35				57.851	57.2	58.8659	5.6435	108.349				48.4646	52.6	61.4246	5.55066	109.889	55.1	82.3896	5.56535	119.885					36.2	36.6887	5.59205	91.5808				56.8604	56.1	67.0179	5.56319	85.0158				37.6077				#DIV/0!					56.1
35.1				57.851	57.3	59.0331	5.64367	108.517				48.4646	52.7	61.7085	5.55227	110.173	55.2	84.2778	5.56471	121.773					36.3	36.7153	5.59251	91.6074				56.8604	56.2	65.7149	5.56514	83.7128				37.6077				#DIV/0!					56.2
35.2				57.851	57.4	59.5287	5.64363	109.012				48.4646	52.8	60.4543	5.55342	108.919	55.3	83.8673	5.56571	121.363					36.4	37.0757	5.59289	91.9678				56.8604	56.3	66.1643	5.56611	84.1622				37.6077				#DIV/0!					56.3
35.3				57.851	57.5	60.1884	5.64414	109.672				48.4646	52.9	59.8327	5.55359	108.297	55.4	82.0939	5.56692	119.589					36.5	38.5687	5.5937	93.4608				56.8604	56.4	66.3685	5.5665	84.3664				37.6077				#DIV/0!					56.4
35.4				57.851	57.6	59.6154	5.64382	109.099				48.4646	53	58.8447	5.55429	107.309	55.5	81.8659	5.56669	119.361					36.6	38.7358	5.59284	93.6279				56.8604	56.5	67.8162	5.56715	85.8141				37.6077				#DIV/0!					56.5
35.5				57.851	57.7	58.852	5.64281	108.335				48.4646	53.1	58.9177	5.55419	107.382	55.6	82.7473	5.56671	120.243					36.7	38.1131	5.59208	93.0052				56.8604	56.6	66.8607	5.56629	84.8586				37.6077				#DIV/0!					56.6
35.6				57.851	57.8	59.4302	5.64281	108.914				48.4646	53.2	59.7528	5.55404	108.217	55.7	84.0322	5.56756	121.528					36.8	38.1338	5.59205	93.0259				56.8604	56.7	65.2812	5.56436	83.2791				37.6077				#DIV/0!					56.7
35.7				57.851	57.9	59.9653	5.64347	109.449				48.4646	53.3	60.8339	5.55463	109.299	55.8	82.9292	5.56706	120.425					36.9	37.4089	5.59204	92.301				56.8604	56.8	65.2737	5.56425	83.2716				37.6077				#DIV/0!					56.8
35.8				57.851	58	59.9759	5.64343	109.459				48.4646	53.4	61.3669	5.55416	109.832	55.9	84.2976	5.56545	121.793					37	36.7929	5.59281	91.685				56.8604	56.9	64.2759	5.56412	82.2738				37.6077				#DIV/0!					56.9
35.9				57.851	58.1	60.4218	5.64338	109.905				48.4646	53.5	60.2887	5.55412	108.753	56	86.2263	5.56286	123.722					37.1	37.9508	5.59298	92.8429				56.8604	57	63.313	5.56498	81.3109				37.6077				#DIV/0!					57
36				57.851	58.2	60.3545	5.64285	109.838				48.4646	53.6	59.5319	5.55505	107.997	56.1	84.3165	5.56157	121.812					37.2	39.2719	5.59191	94.164				56.8604	57.1	64.5394	5.56503	82.5373				37.6077				#DIV/0!					57.1
36.1				57.851	58.3	60.4397	5.64215	109.923				48.4646	53.7	60.2221	5.55542	108.687	56.2	82.7077	5.56227	120.203					37.3	39.3252	5.59214	94.2173				56.8604	57.2	65.7775	5.56387	83.7754				37.6077				#DIV/0!					57.2
36.2				57.851	58.4	60.8795	5.64146	110.363				48.4646	53.8	61.6595	5.55512	110.124	56.3	82.8529	5.56162	120.348					37.4	38.6422	5.5923	93.5343				56.8604	57.3	65.8125	5.56375	83.8104				37.6077				#DIV/0!					57.3
36.3				57.851	58.5	60.4357	5.64116	109.919				48.4646	53.9	62.197	5.55607	110.662	56.4	84.3567	5.56095	121.852					37.5	38.3269	5.59174	93.219				56.8604	57.4	66.1476	5.56361	84.1455				37.6077				#DIV/0!					57.4
36.4				57.851	58.6	60.3537	5.64141	109.837				48.4646	54	61.6718	5.55642	110.136	56.5	82.7184	5.56154	120.214					37.6	37.8251	5.59156	92.7172				56.8604	57.5	64.8723	5.56378	82.8702				37.6077				#DIV/0!					57.5
36.5				57.851	58.7	61.2295	5.6416	110.713				48.4646	54.1	60.5457	5.55634	109.01	56.6	82.0015	5.56352	119.497					37.7	37.0208	5.59084	91.9129				56.8604	57.6	63.5109	5.56516	81.5088				37.6077				#DIV/0!					57.6
36.6				57.851	58.8	61.407	5.64078	110.89				48.4646	54.2	59.9356	5.55728	108.4	56.7	82.5512	5.5652	120.047					37.8	36.9571	5.59103	91.8492				56.8604	57.7	65.0263	5.56542	83.0242				37.6077				#DIV/0!					57.7
36.7				57.851	58.9	60.6474	5.64002	110.131				48.4646	54.3	60.2284	5.5578	108.693	56.8	82.3909	5.56607	119.886					37.9	36.893	5.59118	91.7851				56.8604	57.8	66.735	5.56417	84.7329				37.6077				#DIV/0!					57.8
36.8				57.851	59	61.4053	5.64024	110.889				48.4646	54.4	60.3044	5.55798	108.769	56.9	82.5249	5.56695	120.02					38	37.07	5.59138	91.9621				56.8604	57.9	66.7295	5.56439	84.7274				37.6077				#DIV/0!					57.9
36.9				57.851	59.1	61.3063	5.64134	110.79				48.4646	54.5	59.975	5.55826	108.44	57	80.7061	5.56755	118.201					38.1	37.8476	5.59179	92.7397				56.8604	58	66.559	5.56458	84.5569				37.6077				#DIV/0!					58
37				57.851	59.2	60.3396	5.64239	109.823				48.4646	54.6	59.4391	5.5588	107.904	57.1	80.6077	5.56656	118.103					38.2	38.8187	5.59134	93.7108				56.8604	58.1	65.4558	5.56464	83.4537				37.6077				#DIV/0!					58.1
37.1				57.851	59.3	58.9558	5.6425	108.439				48.4646	54.7	60.4982	5.55892	108.963	57.2	82.2459	5.56584	119.741					38.3	37.1221	5.59187	92.0142				56.8604	58.2	63.9979	5.56576	81.9958				37.6077				#DIV/0!					58.2
37.2				57.851	59.4	57.444	5.64416	106.927				48.4646	54.8	59.8226	5.55807	108.287	57.3	82.7537	5.56651	120.249					38.4	34.6178	5.59416	89.5099				56.8604	58.3	64.4024	5.56562	82.4003				37.6077				#DIV/0!					58.3
37.3				57.851	59.5	58.7389	5.64436	108.222				48.4646	54.9	59.2481	5.55648	107.713	57.4	82.1875	5.56659	119.683					38.5	35.6696	5.59398	90.5617				56.8604	58.4	65.9801	5.56511	83.978				37.6077				#DIV/0!					58.4
37.4				57.851	59.6	60.35	5.64306	109.833				48.4646	55	60.0143	5.55562	108.479	57.5	81.612	5.56615	119.107					38.6	37.2366	5.59269	92.1287				56.8604	58.5	66.6825	5.56607	84.6804				37.6077				#DIV/0!					58.5
37.5				57.851	59.7	59.4736	5.64339	108.957				48.4646	55.1	59.5129	5.55534	107.978	57.6	81.183	5.56633	118.678					38.7	37.7608	5.59296	92.6529				56.8604	58.6	66.0146	5.5662	84.0125				37.6077				#DIV/0!					58.6
37.6				57.851	59.8	58.088	5.64465	107.571				48.4646	55.2	58.6806	5.55555	107.145	57.7	80.9804	5.56614	118.476					38.8	37.7413	5.59265	92.6334				56.8604	58.7	65.367	5.56569	83.3649				37.6077				#DIV/0!					58.7
37.7				57.851	59.9	59.8315	5.64454	109.315				48.4646	55.3	58.7503	5.55504	107.215	57.8	81.5011	5.56617	118.996					38.9	36.7178	5.59228	91.6099				56.8604	58.8	64.2987	5.56589	82.2966				37.6077				#DIV/0!					58.8
37.8				57.851	60	60.8723	5.64247	110.356				48.4646	55.4	59.1561	5.55452	107.621	57.9	82.0453	5.56668	119.541					39	36.9501	5.59304	91.8422				56.8604	58.9	62.7676	5.56508	80.7655				37.6077				#DIV/0!					58.9
37.9				57.851	60.1	59.2298	5.64125	108.713				48.4646	55.5	59.6389	5.55431	108.104	58	82.1692	5.5666	119.665					39.1	38.0153	5.59411	92.9074				56.8604	59	62.4653	5.56588	80.4632				37.6077				#DIV/0!					59
38				57.851	60.2	59.0917	5.64207	108.575				48.4646	55.6	60.1499	5.55369	108.615	58.1	82.4966	5.56662	119.992					39.2	37.4007	5.59395	92.2928				56.8604	59.1	61.9279	5.56649	79.9258				37.6077				#DIV/0!					59.1
38.1				57.851	60.3	59.1369	5.64287	108.62				48.4646	55.7	59.9896	5.55345	108.454	58.2	81.5691	5.56634	119.064					39.3	37.8956	5.59311	92.7877				56.8604	59.2	61.5413	5.56755	79.5392				37.6077				#DIV/0!					59.2
38.2				57.851	60.4	58.5556	5.64349	108.039				48.4646	55.8	59.6802	5.55339	108.145	58.3	82.2346	5.56514	119.73					39.4	37.8306	5.59183	92.7227				56.8604	59.3	62.7612	5.56837	80.7591				37.6077				#DIV/0!					59.3
38.3				57.851	60.5	59.2908	5.64355	108.774				48.4646	55.9	59.6014	5.55304	108.066	58.4	84.2683	5.56354	121.764					39.5	37.4131	5.59036	92.3052				56.8604	59.4	63.06	5.56788	81.0579				37.6077				#DIV/0!					59.4
38.4				57.851	60.6	59.2651	5.64276	108.749				48.4646	56	59.608	5.55281	108.073	58.5	83.5658	5.56352	121.061					39.6	38.8159	5.58946	93.708				56.8604	59.5	62.2145	5.56762	80.2124				37.6077				#DIV/0!					59.5
38.5				57.851	60.7	58.1807	5.64183	107.664				48.4646	56.1	59.0524	5.55255	107.517	58.6	82.6229	5.56416	120.118					39.7	38.4207	5.58997	93.3128				56.8604	59.6	62.7951	5.56822	80.793				37.6077				#DIV/0!					59.6
38.6				57.851	60.8	58.5285	5.64226	108.012				48.4646	56.2	58.1985	5.55282	106.663	58.7	82.4907	5.56405	119.986					39.8	37.4001	5.59084	92.2922				56.8604	59.7	60.7589	5.56947	78.7568				37.6077				#DIV/0!					59.7
38.7				57.851	60.9	59.2564	5.64315	108.74				48.4646	56.3	57.993	5.55236	106.458	58.8	82.4288	5.56407	119.924					39.9	37.3485	5.59072	92.2406				56.8604	59.8	57.1527	5.57255	75.1506				37.6077				#DIV/0!					59.8
38.8				57.851	61	58.9595	5.64308	108.443				48.4646	56.4	58.2198	5.55214	106.684	58.9	83.4212	5.56404	120.917					40			54.8921				56.8604	59.9	58.2926	5.57248	76.2905				37.6077				#DIV/0!					59.9
38.9				57.851	61.1	59.111	5.64267	108.594				48.4646	56.5	59.3204	5.55209	107.785	59	85.068	5.5631	122.563					40.1			54.8921				56.8604	60	59.9163	5.5713	77.9142				37.6077				#DIV/0!
39				57.851	61.2	59.0234	5.64214	108.507				48.4646				48.4646	59.1	83.7344	5.56352	121.23					40.2			54.8921				56.8604	60.1	60.9413	5.57156	78.9392				37.6077				#DIV/0!
39.1				57.851	61.3	59.5515	5.64144	109.035				48.4646				48.4646	59.2	81.7458	5.56508	119.241					40.3			54.8921				56.8604				17.9979				37.6077				#DIV/0!
39.2				57.851	61.4	59.9863	5.64025	109.47				48.4646				48.4646	59.3	82.0216	5.56509	119.517					40.4			54.8921				56.8604				17.9979				37.6077				#DIV/0!
39.3				57.851	61.5	58.8512	5.63937	108.335				48.4646				48.4646	59.4	82.0493	5.56484	119.545					40.5			54.8921				56.8604				17.9979				37.6077				#DIV/0!
39.4				57.851	61.6	58.8059	5.63989	108.289				48.4646				48.4646	59.5	82.5574	5.56458	120.053					40.6			54.8921				56.8604				17.9979				37.6077				#DIV/0!
39.5				57.851	61.7	58.1745	5.64045	107.658				48.4646				48.4646	59.6	83.1366	5.56389	120.632					40.7			54.8921				56.8604				17.9979				37.6077				#DIV/0!
39.6				57.851	61.8	57.1109	5.64163	106.594				48.4646				48.4646	59.7	83.6937	5.56362	121.189					40.8			54.8921				56.8604				17.9979				37.6077				#DIV/0!
39.7				57.851	61.9	57.4717	5.64179	106.955				48.4646				48.4646	59.8	84.5563	5.56288	122.052					40.9			54.8921				56.8604				17.9979				37.6077				#DIV/0!
39.8				57.851	62	58.4921	5.64152	107.976				48.4646				48.4646	59.9	84.0397	5.5628	121.535					41			54.8921				56.8604				17.9979				37.6077				#DIV/0!
39.9				57.851	62.1	58.2231	5.64236	107.707				48.4646				48.4646	60	84.2611	5.56321	121.756					41.1			54.8921				56.8604				17.9979				37.6077				#DIV/0!
40				57.851	62.2	56.9984	5.64338	106.482				48.4646				48.4646	60.1	85.4988	5.5639	122.994					41.2			54.8921				56.8604				17.9979				37.6077				#DIV/0!
40.1				57.851	62.3	57.3914	5.64316	106.875				48.4646				48.4646	60.2	84.8931	5.56333	122.388					41.3			54.8921				56.8604				17.9979				37.6077				#DIV/0!
40.2				57.851	62.4	58.2483	5.64253	107.732				48.4646				48.4646	60.3	82.9587	5.56209	120.454					41.4			54.8921				56.8604				17.9979				37.6077				#DIV/0!
40.3				57.851	62.5	58.723	5.64277	108.206				48.4646				48.4646	60.4	81.1055	5.56285	118.601					41.5			54.8921				56.8604				17.9979				37.6077				#DIV/0!
40.4				57.851	62.6	58.6255	5.64244	108.109				48.4646				48.4646	60.5	81.1275	5.56204	118.623					41.6			54.8921				56.8604				17.9979				37.6077				#DIV/0!
40.5				57.851				49.4834				48.4646				48.4646	60.6	80.9594	5.56135	118.455					41.7			54.8921				56.8604				17.9979				37.6077				#DIV/0!
40.6				57.851				49.4834				48.4646				48.4646	60.7	82.4903	5.56039	119.986					41.8			54.8921				56.8604				17.9979				37.6077				#DIV/0!
40.7				57.851				49.4834				48.4646				48.4646	60.8	84.5944	5.55819	122.09					41.9			54.8921				56.8604				17.9979				37.6077				#DIV/0!
40.8				57.851				49.4834				48.4646				48.4646	60.9	84.0374	5.55753	121.533					42			54.8921				56.8604				17.9979				37.6077				#DIV/0!
40.9				57.851				49.4834				48.4646				48.4646	61	83.0394	5.55749	120.535					42.1			54.8921				56.8604				17.9979				37.6077				#DIV/0!
41				57.851				49.4834				48.4646				48.4646				37.4953					42.2			54.8921				56.8604				17.9979				37.6077				#DIV/0!
41.1				57.851				49.4834				48.4646				48.4646				37.4953					42.3			54.8921				56.8604				17.9979				37.6077				#DIV/0!
41.2				57.851				49.4834				48.4646				48.4646				37.4953					42.4			54.8921				56.8604				17.9979				37.6077				#DIV/0!
41.3				57.851				49.4834				48.4646				48.4646				37.4953					42.5			54.8921				56.8604				17.9979				37.6077				#DIV/0!
41.4				57.851				49.4834				48.4646				48.4646				37.4953					42.6			54.8921				56.8604				17.9979				37.6077				#DIV/0!
41.5				57.851				49.4834				48.4646				48.4646				37.4953					42.7			54.8921				56.8604				17.9979				37.6077				#DIV/0!
41.6				57.851				49.4834				48.4646				48.4646				37.4953					42.8			54.8921				56.8604				17.9979				37.6077				#DIV/0!
41.7				57.851				49.4834				48.4646				48.4646				37.4953					42.9			54.8921				56.8604				17.9979				37.6077				#DIV/0!
41.8				57.851				49.4834				48.4646				48.4646				37.4953					43			54.8921				56.8604				17.9979				37.6077				#DIV/0!
41.9				57.851				49.4834				48.4646				48.4646				37.4953					43.1			54.8921				56.8604				17.9979				37.6077				#DIV/0!
42				57.851				49.4834				48.4646				48.4646				37.4953					43.2			54.8921				56.8604				17.9979				37.6077				#DIV/0!
42.1				57.851				49.4834				48.4646				48.4646				37.4953					43.3			54.8921				56.8604				17.9979				37.6077				#DIV/0!
42.2				57.851				49.4834				48.4646				48.4646				37.4953					43.4			54.8921				56.8604				17.9979				37.6077				#DIV/0!
42.3				57.851				49.4834				48.4646				48.4646				37.4953					43.5			54.8921				56.8604				17.9979				37.6077				#DIV/0!
42.4				57.851				49.4834				48.4646				48.4646				37.4953					43.6			54.8921				56.8604				17.9979				37.6077				#DIV/0!
42.5				57.851				49.4834				48.4646				48.4646				37.4953					43.7			54.8921				56.8604				17.9979				37.6077				#DIV/0!
42.6				57.851				49.4834				48.4646				48.4646				37.4953					43.8			54.8921				56.8604				17.9979				37.6077				#DIV/0!
42.7				57.851				49.4834				48.4646				48.4646				37.4953					43.9			54.8921				56.8604				17.9979				37.6077				#DIV/0!
42.8				57.851				49.4834				48.4646				48.4646				37.4953					44			54.8921				56.8604				17.9979				37.6077				#DIV/0!
42.9				57.851				49.4834				48.4646				48.4646				37.4953					44.1			54.8921				56.8604				17.9979				37.6077				#DIV/0!
43				57.851				49.4834				48.4646				48.4646				37.4953					44.2			54.8921				56.8604				17.9979				37.6077				#DIV/0!
43.1				57.851				49.4834				48.4646				48.4646				37.4953					44.3			54.8921				56.8604				17.9979				37.6077				#DIV/0!
43.2				57.851				49.4834				48.4646				48.4646				37.4953					44.4			54.8921				56.8604				17.9979				37.6077				#DIV/0!
43.3				57.851				49.4834				48.4646				48.4646				37.4953					44.5			54.8921				56.8604				17.9979				37.6077				#DIV/0!
43.4				57.851				49.4834				48.4646				48.4646				37.4953					44.6			54.8921				56.8604				17.9979				37.6077				#DIV/0!
43.5				57.851				49.4834				48.4646				48.4646				37.4953					44.7			54.8921				56.8604				17.9979				37.6077				#DIV/0!
43.6				57.851				49.4834				48.4646				48.4646				37.4953					44.8			54.8921				56.8604				17.9979				37.6077				#DIV/0!
43.7				57.851				49.4834				48.4646				48.4646				37.4953					44.9			54.8921				56.8604				17.9979				37.6077				#DIV/0!
43.8				57.851				49.4834				48.4646				48.4646				37.4953					45			54.8921				56.8604				17.9979				37.6077				#DIV/0!
43.9				57.851				49.4834				48.4646				48.4646				37.4953					45.1			54.8921				56.8604				17.9979				37.6077				#DIV/0!
44				57.851				49.4834				48.4646				48.4646				37.4953					45.2			54.8921				56.8604				17.9979				37.6077				#DIV/0!
44.1				57.851				49.4834				48.4646				48.4646				37.4953					45.3			54.8921				56.8604				17.9979				37.6077				#DIV/0!
44.2				57.851				49.4834				48.4646				48.4646				37.4953					45.4			54.8921				56.8604				17.9979				37.6077				#DIV/0!
44.3				57.851				49.4834				48.4646				48.4646				37.4953					45.5			54.8921				56.8604				17.9979				37.6077				#DIV/0!
44.4				57.851				49.4834				48.4646				48.4646				37.4953					45.6			54.8921				56.8604				17.9979				37.6077				#DIV/0!
44.5				57.851				49.4834				48.4646				48.4646				37.4953					45.7			54.8921				56.8604				17.9979				37.6077				#DIV/0!
44.6				57.851				49.4834				48.4646				48.4646				37.4953					45.8			54.8921				56.8604				17.9979				37.6077				#DIV/0!
44.7				57.851				49.4834				48.4646				48.4646				37.4953					45.9			54.8921				56.8604				17.9979				37.6077				#DIV/0!
44.8				57.851				49.4834				48.4646				48.4646				37.4953					46			54.8921				56.8604				17.9979				37.6077				#DIV/0!
44.9				57.851				49.4834				48.4646				48.4646				37.4953					46.1			54.8921				56.8604				17.9979				37.6077				#DIV/0!
45				57.851				49.4834				48.4646				48.4646				37.4953					46.2			54.8921				56.8604				17.9979				37.6077				#DIV/0!
45.1				57.851				49.4834				48.4646				48.4646				37.4953					46.3			54.8921				56.8604				17.9979				37.6077				#DIV/0!
45.2				57.851				49.4834				48.4646				48.4646				37.4953					46.4			54.8921				56.8604				17.9979				37.6077				#DIV/0!
45.3				57.851				49.4834				48.4646				48.4646				37.4953					46.5			54.8921				56.8604				17.9979				37.6077				#DIV/0!
45.4				57.851				49.4834				48.4646				48.4646				37.4953					46.6			54.8921				56.8604				17.9979				37.6077				#DIV/0!
45.5				57.851				49.4834				48.4646				48.4646				37.4953					46.7			54.8921				56.8604				17.9979				37.6077				#DIV/0!
45.6				57.851				49.4834				48.4646				48.4646				37.4953					46.8			54.8921				56.8604				17.9979				37.6077				#DIV/0!
45.7				57.851				49.4834				48.4646				48.4646				37.4953					46.9			54.8921				56.8604				17.9979				37.6077				#DIV/0!
45.8				57.851				49.4834				48.4646				48.4646				37.4953					47			54.8921				56.8604				17.9979				37.6077				#DIV/0!
45.9				57.851				49.4834				48.4646				48.4646				37.4953					47.1			54.8921				56.8604				17.9979				37.6077				#DIV/0!
46				57.851				49.4834				48.4646				48.4646				37.4953					47.2			54.8921				56.8604				17.9979				37.6077				#DIV/0!
46.1				57.851				49.4834				48.4646				48.4646				37.4953					47.3			54.8921				56.8604				17.9979				37.6077				#DIV/0!
46.2				57.851				49.4834				48.4646				48.4646				37.4953					47.4			54.8921				56.8604				17.9979				37.6077				#DIV/0!
46.3				57.851				49.4834				48.4646				48.4646				37.4953					47.5			54.8921				56.8604				17.9979				37.6077				#DIV/0!
46.4				57.851				49.4834				48.4646				48.4646				37.4953					47.6			54.8921				56.8604				17.9979				37.6077				#DIV/0!
46.5				57.851				49.4834				48.4646				48.4646				37.4953					47.7			54.8921				56.8604				17.9979				37.6077				#DIV/0!
46.6				57.851				49.4834				48.4646				48.4646				37.4953					47.8			54.8921				56.8604				17.9979				37.6077				#DIV/0!
46.7				57.851				49.4834				48.4646				48.4646				37.4953					47.9			54.8921				56.8604				17.9979				37.6077				#DIV/0!
46.8				57.851				49.4834				48.4646				48.4646				37.4953					48			54.8921				56.8604				17.9979				37.6077				#DIV/0!
46.9				57.851				49.4834				48.4646				48.4646				37.4953					48.1			54.8921				56.8604				17.9979				37.6077				#DIV/0!
47				57.851				49.4834				48.4646				48.4646				37.4953					48.2			54.8921				56.8604				17.9979				37.6077				#DIV/0!
47.1				57.851				49.4834				48.4646				48.4646				37.4953					48.3			54.8921				56.8604				17.9979				37.6077				#DIV/0!
47.2				57.851				49.4834				48.4646				48.4646				37.4953					48.4			54.8921				56.8604				17.9979				37.6077				#DIV/0!
47.3				57.851				49.4834				48.4646				48.4646				37.4953					48.5			54.8921				56.8604				17.9979				37.6077				#DIV/0!
47.4				57.851				49.4834				48.4646				48.4646				37.4953					48.6			54.8921				56.8604				17.9979				37.6077				#DIV/0!
47.5				57.851				49.4834				48.4646				48.4646				37.4953					48.7			54.8921				56.8604				17.9979				37.6077				#DIV/0!
47.6				57.851				49.4834				48.4646				48.4646				37.4953					48.8			54.8921				56.8604				17.9979				37.6077				#DIV/0!
47.7				57.851				49.4834				48.4646				48.4646				37.4953					48.9			54.8921				56.8604				17.9979				37.6077				#DIV/0!
47.8				57.851				49.4834				48.4646				48.4646				37.4953					49			54.8921				56.8604				17.9979				37.6077				#DIV/0!
47.9				57.851				49.4834				48.4646				48.4646				37.4953					49.1			54.8921				56.8604				17.9979				37.6077				#DIV/0!
48				57.851				49.4834				48.4646				48.4646				37.4953					49.2			54.8921				56.8604				17.9979				37.6077				#DIV/0!
48.1				57.851				49.4834				48.4646				48.4646				37.4953					49.3			54.8921				56.8604				17.9979				37.6077				#DIV/0!
48.2				57.851				49.4834				48.4646				48.4646				37.4953					49.4			54.8921				56.8604				17.9979				37.6077				#DIV/0!
48.3				57.851				49.4834				48.4646				48.4646				37.4953					49.5			54.8921				56.8604				17.9979				37.6077				#DIV/0!
48.4				57.851				49.4834				48.4646				48.4646				37.4953					49.6			54.8921				56.8604				17.9979				37.6077				#DIV/0!
48.5				57.851				49.4834				48.4646				48.4646				37.4953					49.7			54.8921				56.8604				17.9979				37.6077				#DIV/0!
48.6				57.851				49.4834				48.4646				48.4646				37.4953					49.8			54.8921				56.8604				17.9979				37.6077				#DIV/0!
48.7				57.851				49.4834				48.4646				48.4646				37.4953					49.9			54.8921				56.8604				17.9979				37.6077				#DIV/0!
48.8				57.851				49.4834				48.4646				48.4646				37.4953					50			54.8921				56.8604				17.9979				37.6077				#DIV/0!
48.9				57.851				49.4834				48.4646				48.4646				37.4953					50.1			54.8921				56.8604				17.9979				37.6077				#DIV/0!
49				57.851				49.4834				48.4646				48.4646				37.4953					50.2			54.8921				56.8604				17.9979				37.6077				#DIV/0!
49.1				57.851				49.4834				48.4646				48.4646				37.4953					50.3			54.8921				56.8604				17.9979				37.6077				#DIV/0!
49.2				57.851				49.4834				48.4646				48.4646				37.4953					50.4			54.8921				56.8604				17.9979				37.6077				#DIV/0!
49.3				57.851				49.4834				48.4646				48.4646				37.4953					50.5			54.8921				56.8604				17.9979				37.6077				#DIV/0!
49.4				57.851				49.4834				48.4646				48.4646				37.4953					50.6			54.8921				56.8604				17.9979				37.6077				#DIV/0!
49.5				57.851				49.4834				48.4646				48.4646				37.4953					50.7			54.8921				56.8604				17.9979				37.6077				#DIV/0!
49.6				57.851				49.4834				48.4646				48.4646				37.4953					50.8			54.8921				56.8604				17.9979				37.6077				#DIV/0!
49.7				57.851				49.4834				48.4646				48.4646				37.4953					50.9			54.8921				56.8604				17.9979				37.6077				#DIV/0!
49.8				57.851				49.4834				48.4646				48.4646				37.4953					51			54.8921				56.8604				17.9979				37.6077				#DIV/0!
49.9				57.851				49.4834				48.4646				48.4646				37.4953					51.1			54.8921				56.8604				17.9979				37.6077				#DIV/0!
50				57.851				49.4834				48.4646				48.4646				37.4953					51.2			54.8921				56.8604				17.9979				37.6077				#DIV/0!
50.1				57.851				49.4834				48.4646				48.4646				37.4953					51.3			54.8921				56.8604				17.9979				37.6077				#DIV/0!
50.2				57.851				49.4834				48.4646				48.4646				37.4953					51.4			54.8921				56.8604				17.9979				37.6077				#DIV/0!
50.3				57.851				49.4834				48.4646				48.4646				37.4953					51.5			54.8921				56.8604				17.9979				37.6077				#DIV/0!
50.4				57.851				49.4834				48.4646				48.4646				37.4953					51.6			54.8921				56.8604				17.9979				37.6077				#DIV/0!
50.5				57.851				49.4834				48.4646				48.4646				37.4953					51.7			54.8921				56.8604				17.9979				37.6077				#DIV/0!
50.6				57.851				49.4834				48.4646				48.4646				37.4953					51.8			54.8921				56.8604				17.9979				37.6077				#DIV/0!
50.7				57.851				49.4834				48.4646				48.4646				37.4953					51.9			54.8921				56.8604				17.9979				37.6077				#DIV/0!
50.8				57.851				49.4834				48.4646				48.4646				37.4953					52			54.8921				56.8604				17.9979				37.6077				#DIV/0!
50.9				57.851				49.4834				48.4646				48.4646				37.4953					52.1			54.8921				56.8604				17.9979				37.6077				#DIV/0!
51				57.851				49.4834				48.4646				48.4646				37.4953					52.2			54.8921				56.8604				17.9979				37.6077				#DIV/0!
51.1				57.851				49.4834				48.4646				48.4646				37.4953					52.3			54.8921				56.8604				17.9979				37.6077				#DIV/0!
51.2				57.851				49.4834				48.4646				48.4646				37.4953					52.4			54.8921				56.8604				17.9979				37.6077				#DIV/0!
51.3				57.851				49.4834				48.4646				48.4646				37.4953					52.5			54.8921				56.8604				17.9979				37.6077				#DIV/0!
51.4				57.851				49.4834				48.4646				48.4646				37.4953					52.6			54.8921				56.8604				17.9979				37.6077				#DIV/0!
51.5				57.851				49.4834				48.4646				48.4646				37.4953					52.7			54.8921				56.8604				17.9979				37.6077				#DIV/0!
51.6				57.851				49.4834				48.4646				48.4646				37.4953					52.8			54.8921				56.8604				17.9979				37.6077				#DIV/0!
51.7				57.851				49.4834				48.4646				48.4646				37.4953					52.9			54.8921				56.8604				17.9979				37.6077				#DIV/0!
51.8				57.851				49.4834				48.4646				48.4646				37.4953					53			54.8921				56.8604				17.9979				37.6077				#DIV/0!
51.9				57.851				49.4834				48.4646				48.4646				37.4953					53.1			54.8921				56.8604				17.9979				37.6077				#DIV/0!
52				57.851				49.4834				48.4646				48.4646				37.4953					53.2			54.8921				56.8604				17.9979				37.6077				#DIV/0!
52.1				57.851				49.4834				48.4646				48.4646				37.4953					53.3			54.8921				56.8604				17.9979				37.6077				#DIV/0!
52.2				57.851				49.4834				48.4646				48.4646				37.4953					53.4			54.8921				56.8604				17.9979				37.6077				#DIV/0!
52.3				57.851				49.4834				48.4646				48.4646				37.4953					53.5			54.8921				56.8604				17.9979				37.6077				#DIV/0!
52.4				57.851				49.4834				48.4646				48.4646				37.4953					53.6			54.8921				56.8604				17.9979				37.6077				#DIV/0!
52.5				57.851				49.4834				48.4646				48.4646				37.4953					53.7			54.8921				56.8604				17.9979				37.6077				#DIV/0!
52.6				57.851				49.4834				48.4646				48.4646				37.4953					53.8			54.8921				56.8604				17.9979				37.6077				#DIV/0!
52.7				57.851				49.4834				48.4646				48.4646				37.4953					53.9			54.8921				56.8604				17.9979				37.6077				#DIV/0!
52.8				57.851				49.4834				48.4646				48.4646				37.4953					54			54.8921				56.8604				17.9979				37.6077				#DIV/0!
52.9				57.851				49.4834				48.4646				48.4646				37.4953					54.1			54.8921				56.8604				17.9979				37.6077				#DIV/0!
53				57.851				49.4834				48.4646				48.4646				37.4953					54.2			54.8921				56.8604				17.9979				37.6077				#DIV/0!
53.1				57.851				49.4834				48.4646				48.4646				37.4953					54.3			54.8921				56.8604				17.9979				37.6077				#DIV/0!
53.2				57.851				49.4834				48.4646				48.4646				37.4953					54.4			54.8921				56.8604				17.9979				37.6077				#DIV/0!
53.3				57.851				49.4834				48.4646				48.4646				37.4953					54.5			54.8921				56.8604				17.9979				37.6077				#DIV/0!
53.4				57.851				49.4834				48.4646				48.4646				37.4953					54.6			54.8921				56.8604				17.9979				37.6077				#DIV/0!
53.5				57.851				49.4834				48.4646				48.4646				37.4953					54.7			54.8921				56.8604				17.9979				37.6077				#DIV/0!
53.6				57.851				49.4834				48.4646				48.4646				37.4953					54.8			54.8921				56.8604				17.9979				37.6077				#DIV/0!
53.7				57.851				49.4834				48.4646				48.4646				37.4953					54.9			54.8921				56.8604				17.9979				37.6077				#DIV/0!
53.8				57.851				49.4834				48.4646				48.4646				37.4953					55			54.8921				56.8604				17.9979				37.6077				#DIV/0!
53.9				57.851				49.4834				48.4646				48.4646				37.4953					55.1			54.8921				56.8604				17.9979				37.6077				#DIV/0!
54				57.851				49.4834				48.4646				48.4646				37.4953					55.2			54.8921				56.8604				17.9979				37.6077				#DIV/0!
54.1				57.851				49.4834				48.4646				48.4646				37.4953					55.3			54.8921				56.8604				17.9979				37.6077				#DIV/0!
54.2				57.851				49.4834				48.4646				48.4646				37.4953					55.4			54.8921				56.8604				17.9979				37.6077				#DIV/0!
54.3				57.851				49.4834				48.4646				48.4646				37.4953					55.5			54.8921				56.8604				17.9979				37.6077				#DIV/0!
54.4				57.851				49.4834				48.4646				48.4646				37.4953					55.6			54.8921				56.8604				17.9979				37.6077				#DIV/0!
54.5				57.851				49.4834				48.4646				48.4646				37.4953					55.7			54.8921				56.8604				17.9979				37.6077				#DIV/0!
54.6				57.851				49.4834				48.4646				48.4646				37.4953					55.8			54.8921				56.8604				17.9979				37.6077				#DIV/0!
54.7				57.851				49.4834				48.4646				48.4646				37.4953					55.9			54.8921				56.8604				17.9979				37.6077				#DIV/0!
54.8				57.851				49.4834				48.4646				48.4646				37.4953					56			54.8921				56.8604				17.9979				37.6077				#DIV/0!
54.9				57.851				49.4834				48.4646				48.4646				37.4953					56.1			54.8921				56.8604				17.9979				37.6077				#DIV/0!
55				57.851				49.4834				48.4646				48.4646				37.4953					56.2			54.8921				56.8604				17.9979				37.6077				#DIV/0!
55.1				57.851				49.4834				48.4646				48.4646				37.4953					56.3			54.8921				56.8604				17.9979				37.6077				#DIV/0!
55.2				57.851				49.4834				48.4646				48.4646				37.4953					56.4			54.8921				56.8604				17.9979				37.6077				#DIV/0!
55.3				57.851				49.4834				48.4646				48.4646				37.4953					56.5			54.8921				56.8604				17.9979				37.6077				#DIV/0!
55.4				57.851				49.4834				48.4646				48.4646				37.4953					56.6			54.8921				56.8604				17.9979				37.6077				#DIV/0!
55.5				57.851				49.4834				48.4646				48.4646				37.4953					56.7			54.8921				56.8604				17.9979				37.6077				#DIV/0!
55.6				57.851				49.4834				48.4646				48.4646				37.4953					56.8			54.8921				56.8604				17.9979				37.6077				#DIV/0!
55.7				57.851				49.4834				48.4646				48.4646				37.4953					56.9			54.8921				56.8604				17.9979				37.6077				#DIV/0!
55.8				57.851				49.4834				48.4646				48.4646				37.4953					57			54.8921				56.8604				17.9979				37.6077				#DIV/0!
55.9				57.851				49.4834				48.4646				48.4646				37.4953					57.1			54.8921				56.8604				17.9979				37.6077				#DIV/0!
56				57.851				49.4834				48.4646				48.4646				37.4953					57.2			54.8921				56.8604				17.9979				37.6077				#DIV/0!
56.1				57.851				49.4834				48.4646				48.4646				37.4953					57.3			54.8921				56.8604				17.9979				37.6077				#DIV/0!
56.2				57.851				49.4834				48.4646				48.4646				37.4953					57.4			54.8921				56.8604				17.9979				37.6077				#DIV/0!
56.3				57.851				49.4834				48.4646				48.4646				37.4953					57.5			54.8921				56.8604				17.9979				37.6077				#DIV/0!
56.4				57.851				49.4834				48.4646				48.4646				37.4953					57.6			54.8921				56.8604				17.9979				37.6077				#DIV/0!
56.5				57.851				49.4834				48.4646				48.4646				37.4953					57.7			54.8921				56.8604				17.9979				37.6077				#DIV/0!
56.6				57.851				49.4834				48.4646				48.4646				37.4953					57.8			54.8921				56.8604				17.9979				37.6077				#DIV/0!
56.7				57.851				49.4834				48.4646				48.4646				37.4953					57.9			54.8921				56.8604				17.9979				37.6077				#DIV/0!
56.8				57.851				49.4834				48.4646				48.4646				37.4953					58			54.8921				56.8604				17.9979				37.6077				#DIV/0!
56.9				57.851				49.4834				48.4646				48.4646				37.4953					58.1			54.8921				56.8604				17.9979				37.6077				#DIV/0!
57				57.851				49.4834				48.4646				48.4646				37.4953					58.2			54.8921				56.8604				17.9979				37.6077				#DIV/0!
57.1				57.851				49.4834				48.4646				48.4646				37.4953					58.3			54.8921				56.8604				17.9979				37.6077				#DIV/0!
57.2				57.851				49.4834				48.4646				48.4646				37.4953					58.4			54.8921				56.8604				17.9979				37.6077				#DIV/0!
57.3				57.851				49.4834				48.4646				48.4646				37.4953					58.5			54.8921				56.8604				17.9979				37.6077				#DIV/0!
57.4				57.851				49.4834				48.4646				48.4646				37.4953					58.6			54.8921				56.8604				17.9979				37.6077				#DIV/0!
57.5				57.851				49.4834				48.4646				48.4646				37.4953					58.7			54.8921				56.8604				17.9979				37.6077				#DIV/0!
57.6				57.851				49.4834				48.4646				48.4646				37.4953					58.8			54.8921				56.8604				17.9979				37.6077				#DIV/0!
57.7				57.851				49.4834				48.4646				48.4646				37.4953					58.9			54.8921				56.8604				17.9979				37.6077				#DIV/0!
57.8				57.851				49.4834				48.4646				48.4646				37.4953					59			54.8921				56.8604				17.9979				37.6077				#DIV/0!
57.9				57.851				49.4834				48.4646				48.4646				37.4953					59.1			54.8921				56.8604				17.9979				37.6077				#DIV/0!
58				57.851				49.4834				48.4646				48.4646				37.4953					59.2			54.8921				56.8604				17.9979				37.6077				#DIV/0!
58.1				57.851				49.4834				48.4646				48.4646				37.4953					59.3			54.8921				56.8604				17.9979				37.6077				#DIV/0!
58.2				57.851				49.4834				48.4646				48.4646				37.4953					59.4			54.8921				56.8604				17.9979				37.6077				#DIV/0!
58.3				57.851				49.4834				48.4646				48.4646				37.4953					59.5			54.8921				56.8604				17.9979				37.6077				#DIV/0!
58.4				57.851				49.4834				48.4646				48.4646				37.4953					59.6			54.8921				56.8604				17.9979				37.6077				#DIV/0!
58.5				57.851				49.4834				48.4646				48.4646				37.4953					59.7			54.8921				56.8604				17.9979				37.6077				#DIV/0!
58.6				57.851				49.4834				48.4646				48.4646				37.4953					59.8			54.8921				56.8604				17.9979				37.6077				#DIV/0!
58.7				57.851				49.4834				48.4646				48.4646				37.4953					59.9			54.8921				56.8604				17.9979				37.6077				#DIV/0!
58.8				57.851				49.4834				48.4646				48.4646				37.4953					60			54.8921				56.8604				17.9979				37.6077				#DIV/0!
58.9				57.851				49.4834				48.4646				48.4646				37.4953					60.1			54.8921				56.8604				17.9979				37.6077				#DIV/0!
59				57.851				49.4834				48.4646				48.4646				37.4953					60.2			54.8921				56.8604				17.9979				37.6077				#DIV/0!
59.1				57.851				49.4834				48.4646				48.4646				37.4953					60.3			54.8921				56.8604				17.9979				37.6077				#DIV/0!
59.2				57.851				49.4834				48.4646				48.4646				37.4953					60.4			54.8921				56.8604				17.9979				37.6077				#DIV/0!
59.3				57.851				49.4834				48.4646				48.4646				37.4953					60.5			54.8921				56.8604				17.9979				37.6077				#DIV/0!
59.4				57.851				49.4834				48.4646				48.4646				37.4953					60.6			54.8921				56.8604				17.9979				37.6077				#DIV/0!
59.5				57.851				49.4834				48.4646				48.4646				37.4953					60.7			54.8921				56.8604				17.9979				37.6077				#DIV/0!
59.6				57.851				49.4834				48.4646				48.4646				37.4953					60.8			54.8921				56.8604				17.9979				37.6077				#DIV/0!
59.7				57.851				49.4834				48.4646				48.4646				37.4953					60.9			54.8921				56.8604				17.9979				37.6077				#DIV/0!
59.8				57.851				49.4834				48.4646				48.4646				37.4953					61			54.8921				56.8604				17.9979				37.6077				#DIV/0!
59.9				57.851				49.4834				48.4646				48.4646				37.4953					61.1			54.8921				56.8604				17.9979				37.6077				#DIV/0!
60				57.851				49.4834				48.4646				48.4646				37.4953					61.2			54.8921				56.8604				17.9979				37.6077				#DIV/0!
60.1				57.851				49.4834				48.4646				48.4646				37.4953					61.3			54.8921				56.8604				17.9979				37.6077				#DIV/0!
60.2				57.851				49.4834				48.4646				48.4646				37.4953					61.4			54.8921				56.8604				17.9979				37.6077				#DIV/0!
60.3				57.851				49.4834				48.4646				48.4646				37.4953					61.5			54.8921				56.8604				17.9979				37.6077				#DIV/0!
60.4				57.851				49.4834				48.4646				48.4646				37.4953					61.6			54.8921				56.8604				17.9979				37.6077				#DIV/0!
60.5				57.851				49.4834				48.4646				48.4646				37.4953					61.7			54.8921				56.8604				17.9979				37.6077				#DIV/0!
60.6				57.851				49.4834				48.4646				48.4646				37.4953					61.8			54.8921				56.8604				17.9979				37.6077				#DIV/0!
60.7				57.851				49.4834				48.4646				48.4646				37.4953					61.9			54.8921				56.8604				17.9979				37.6077				#DIV/0!
60.8				57.851				49.4834				48.4646				48.4646				37.4953					62			54.8921				56.8604				17.9979				37.6077				#DIV/0!
60.9				57.851				49.4834				48.4646				48.4646				37.4953					62.1			54.8921				56.8604				17.9979				37.6077				#DIV/0!
61				57.851				49.4834				48.4646				48.4646				37.4953					62.2			54.8921				56.8604				17.9979				37.6077				#DIV/0!
61.1				57.851				49.4834				48.4646				48.4646				37.4953					62.3			54.8921				56.8604				17.9979				37.6077				#DIV/0!
61.2				57.851				49.4834				48.4646				48.4646				37.4953					62.4			54.8921				56.8604				17.9979				37.6077				#DIV/0!
61.3				57.851				49.4834				48.4646				48.4646				37.4953					62.5			54.8921				56.8604				17.9979				37.6077				#DIV/0!
61.4				57.851				49.4834				48.4646				48.4646				37.4953					62.6			54.8921				56.8604				17.9979				37.6077				#DIV/0!
61.5				57.851				49.4834				48.4646				48.4646				37.4953					62.7			54.8921				56.8604				17.9979				37.6077				#DIV/0!
61.6				57.851				49.4834				48.4646				48.4646				37.4953					62.8			54.8921				56.8604				17.9979				37.6077				#DIV/0!
61.7				57.851				49.4834				48.4646				48.4646				37.4953					62.9			54.8921				56.8604				17.9979				37.6077				#DIV/0!
61.8				57.851				49.4834				48.4646				48.4646				37.4953					63			54.8921				56.8604				17.9979				37.6077				#DIV/0!
61.9				57.851				49.4834				48.4646				48.4646				37.4953					63.1			54.8921				56.8604				17.9979				37.6077				#DIV/0!
62				57.851				49.4834				48.4646				48.4646				37.4953					63.2			54.8921				56.8604				17.9979				37.6077				#DIV/0!
62.1				57.851				49.4834				48.4646				48.4646				37.4953					63.3			54.8921				56.8604				17.9979				37.6077				#DIV/0!
62.2				57.851				49.4834				48.4646				48.4646				37.4953					63.4			54.8921				56.8604				17.9979				37.6077				#DIV/0!
62.3				57.851				49.4834				48.4646				48.4646				37.4953					63.5			54.8921				56.8604				17.9979				37.6077				#DIV/0!
62.4				57.851				49.4834				48.4646				48.4646				37.4953					63.6			54.8921				56.8604				17.9979				37.6077				#DIV/0!
62.5				57.851				49.4834				48.4646				48.4646				37.4953					63.7			54.8921				56.8604				17.9979				37.6077				#DIV/0!
62.6				57.851				49.4834				48.4646				48.4646				37.4953					63.8			54.8921				56.8604				17.9979				37.6077				#DIV/0!
62.7				57.851				49.4834				48.4646				48.4646				37.4953					63.9			54.8921				56.8604				17.9979				37.6077				#DIV/0!
62.8				57.851				49.4834				48.4646				48.4646				37.4953					64			54.8921				56.8604				17.9979				37.6077				#DIV/0!
62.9				57.851				49.4834				48.4646				48.4646				37.4953					64.1			54.8921				56.8604				17.9979				37.6077				#DIV/0!
63				57.851				49.4834				48.4646				48.4646				37.4953					64.2			54.8921				56.8604				17.9979				37.6077				#DIV/0!
63.1				57.851				49.4834				48.4646				48.4646				37.4953					64.3			54.8921				56.8604				17.9979				37.6077				#DIV/0!
63.2				57.851				49.4834				48.4646				48.4646				37.4953					64.4			54.8921				56.8604				17.9979				37.6077				#DIV/0!
63.3				57.851				49.4834				48.4646				48.4646				37.4953					64.5			54.8921				56.8604				17.9979				37.6077				#DIV/0!
63.4				57.851				49.4834				48.4646				48.4646				37.4953					64.6			54.8921				56.8604				17.9979				37.6077				#DIV/0!
63.5				57.851				49.4834				48.4646				48.4646				37.4953					64.7			54.8921				56.8604				17.9979				37.6077				#DIV/0!
63.6				57.851				49.4834				48.4646				48.4646				37.4953					64.8			54.8921				56.8604				17.9979				37.6077				#DIV/0!
63.7				57.851				49.4834				48.4646				48.4646				37.4953					64.9			54.8921				56.8604				17.9979				37.6077				#DIV/0!
63.8				57.851				49.4834				48.4646				48.4646				37.4953					65			54.8921				56.8604				17.9979				37.6077				#DIV/0!
63.9				57.851				49.4834				48.4646				48.4646				37.4953					65.1			54.8921				56.8604				17.9979				37.6077				#DIV/0!
64				57.851				49.4834				48.4646				48.4646				37.4953					65.2			54.8921				56.8604				17.9979				37.6077				#DIV/0!
64.1				57.851				49.4834				48.4646				48.4646				37.4953					65.3			54.8921				56.8604				17.9979				37.6077				#DIV/0!
64.2				57.851				49.4834				48.4646				48.4646				37.4953					65.4			54.8921				56.8604				17.9979				37.6077				#DIV/0!
64.3				57.851				49.4834				48.4646				48.4646				37.4953					65.5			54.8921				56.8604				17.9979				37.6077				#DIV/0!
64.4				57.851				49.4834				48.4646				48.4646				37.4953					65.6			54.8921				56.8604				17.9979				37.6077				#DIV/0!
64.5				57.851				49.4834				48.4646				48.4646				37.4953					65.7			54.8921				56.8604				17.9979				37.6077				#DIV/0!
64.6				57.851				49.4834				48.4646				48.4646				37.4953					65.8			54.8921				56.8604				17.9979				37.6077				#DIV/0!
64.7				57.851				49.4834				48.4646				48.4646				37.4953					65.9			54.8921				56.8604				17.9979				37.6077				#DIV/0!
64.8				57.851				49.4834				48.4646				48.4646				37.4953					66			54.8921				56.8604				17.9979				37.6077				#DIV/0!
64.9				57.851				49.4834				48.4646				48.4646				37.4953					66.1			54.8921				56.8604				17.9979				37.6077				#DIV/0!
65				57.851				49.4834				48.4646				48.4646				37.4953					66.2			54.8921				56.8604				17.9979				37.6077				#DIV/0!
65.1				57.851				49.4834				48.4646				48.4646				37.4953					66.3			54.8921				56.8604				17.9979				37.6077				#DIV/0!
65.2				57.851				49.4834				48.4646				48.4646				37.4953					66.4			54.8921				56.8604				17.9979				37.6077				#DIV/0!
65.3				57.851				49.4834				48.4646				48.4646				37.4953					66.5			54.8921				56.8604				17.9979				37.6077				#DIV/0!
65.4				57.851				49.4834				48.4646				48.4646				37.4953					66.6			54.8921				56.8604				17.9979				37.6077				#DIV/0!
65.5				57.851				49.4834				48.4646				48.4646				37.4953					66.7			54.8921				56.8604				17.9979				37.6077				#DIV/0!
65.6				57.851				49.4834				48.4646				48.4646				37.4953					66.8			54.8921				56.8604				17.9979				37.6077				#DIV/0!
65.7				57.851				49.4834				48.4646				48.4646				37.4953					66.9			54.8921				56.8604				17.9979				37.6077				#DIV/0!
65.8				57.851				49.4834				48.4646				48.4646				37.4953					67			54.8921				56.8604				17.9979				37.6077				#DIV/0!
65.9				57.851				49.4834				48.4646				48.4646				37.4953					67.1			54.8921				56.8604				17.9979				37.6077				#DIV/0!
66				57.851				49.4834				48.4646				48.4646				37.4953					67.2			54.8921				56.8604				17.9979				37.6077				#DIV/0!
66.1				57.851				49.4834				48.4646				48.4646				37.4953					67.3			54.8921				56.8604				17.9979				37.6077				#DIV/0!
66.2				57.851				49.4834				48.4646				48.4646				37.4953					67.4			54.8921				56.8604				17.9979				37.6077				#DIV/0!
66.3				57.851				49.4834				48.4646				48.4646				37.4953					67.5			54.8921				56.8604				17.9979				37.6077				#DIV/0!
66.4				57.851				49.4834				48.4646				48.4646				37.4953					67.6			54.8921				56.8604				17.9979				37.6077				#DIV/0!
66.5				57.851				49.4834				48.4646				48.4646				37.4953					67.7			54.8921				56.8604				17.9979				37.6077				#DIV/0!
66.6				57.851				49.4834				48.4646				48.4646				37.4953					67.8			54.8921				56.8604				17.9979				37.6077				#DIV/0!
66.7				57.851				49.4834				48.4646				48.4646				37.4953					67.9			54.8921				56.8604				17.9979				37.6077				#DIV/0!
66.8				57.851				49.4834				48.4646				48.4646				37.4953					68			54.8921				56.8604				17.9979				37.6077				#DIV/0!
66.9				57.851				49.4834				48.4646				48.4646				37.4953					68.1			54.8921				56.8604				17.9979				37.6077				#DIV/0!
67				57.851				49.4834				48.4646				48.4646				37.4953					68.2			54.8921				56.8604				17.9979				37.6077				#DIV/0!
67.1				57.851				49.4834				48.4646				48.4646				37.4953					68.3			54.8921				56.8604				17.9979				37.6077				#DIV/0!
67.2				57.851				49.4834				48.4646				48.4646				37.4953					68.4			54.8921				56.8604				17.9979				37.6077				#DIV/0!
67.3				57.851				49.4834				48.4646				48.4646				37.4953					68.5			54.8921				56.8604				17.9979				37.6077				#DIV/0!
67.4				57.851				49.4834				48.4646				48.4646				37.4953					68.6			54.8921				56.8604				17.9979				37.6077				#DIV/0!
67.5				57.851				49.4834				48.4646				48.4646				37.4953					68.7			54.8921				56.8604				17.9979				37.6077				#DIV/0!
67.6				57.851				49.4834				48.4646				48.4646				37.4953					68.8			54.8921				56.8604				17.9979				37.6077				#DIV/0!
67.7				57.851				49.4834				48.4646				48.4646				37.4953					68.9			54.8921				56.8604				17.9979				37.6077				#DIV/0!
67.8				57.851				49.4834				48.4646				48.4646				37.4953					69			54.8921				56.8604				17.9979				37.6077				#DIV/0!
67.9				57.851				49.4834				48.4646				48.4646				37.4953					69.1			54.8921				56.8604				17.9979				37.6077				#DIV/0!
68				57.851				49.4834				48.4646				48.4646				37.4953					69.2			54.8921				56.8604				17.9979				37.6077				#DIV/0!
68.1				57.851				49.4834				48.4646				48.4646				37.4953					69.3			54.8921				56.8604				17.9979				37.6077				#DIV/0!
68.2				57.851				49.4834				48.4646				48.4646				37.4953					69.4			54.8921				56.8604				17.9979				37.6077				#DIV/0!
68.3				57.851				49.4834				48.4646				48.4646				37.4953					69.5			54.8921				56.8604				17.9979				37.6077				#DIV/0!
68.4				57.851				49.4834				48.4646				48.4646				37.4953					69.6			54.8921				56.8604				17.9979				37.6077				#DIV/0!
68.5				57.851				49.4834				48.4646				48.4646				37.4953					69.7			54.8921				56.8604				17.9979				37.6077				#DIV/0!
68.6				57.851				49.4834				48.4646				48.4646				37.4953					69.8			54.8921				56.8604				17.9979				37.6077				#DIV/0!
68.7				57.851				49.4834				48.4646				48.4646				37.4953					69.9			54.8921				56.8604				17.9979				37.6077				#DIV/0!
68.8				57.851				49.4834				48.4646				48.4646				37.4953					70			54.8921				56.8604				17.9979				37.6077				#DIV/0!
68.9				57.851				49.4834				48.4646				48.4646				37.4953					70.1			54.8921				56.8604				17.9979				37.6077				#DIV/0!
69				57.851				49.4834				48.4646				48.4646				37.4953					70.2			54.8921				56.8604				17.9979				37.6077				#DIV/0!
69.1				57.851				49.4834				48.4646				48.4646				37.4953					70.3			54.8921				56.8604				17.9979				37.6077				#DIV/0!
69.2				57.851				49.4834				48.4646				48.4646				37.4953					70.4			54.8921				56.8604				17.9979				37.6077				#DIV/0!
69.3				57.851				49.4834				48.4646				48.4646				37.4953					70.5			54.8921				56.8604				17.9979				37.6077				#DIV/0!
69.4				57.851				49.4834				48.4646				48.4646				37.4953					70.6			54.8921				56.8604				17.9979				37.6077				#DIV/0!
69.5				57.851				49.4834				48.4646				48.4646				37.4953					70.7			54.8921				56.8604				17.9979				37.6077				#DIV/0!
69.6				57.851				49.4834				48.4646				48.4646				37.4953					70.8			54.8921				56.8604				17.9979				37.6077				#DIV/0!
69.7				57.851				49.4834				48.4646				48.4646				37.4953					70.9			54.8921				56.8604				17.9979				37.6077				#DIV/0!
69.8				57.851				49.4834				48.4646				48.4646				37.4953					71			54.8921				56.8604				17.9979				37.6077				#DIV/0!
69.9				57.851				49.4834				48.4646				48.4646				37.4953					71.1			54.8921				56.8604				17.9979				37.6077				#DIV/0!
70				57.851				49.4834				48.4646				48.4646				37.4953					71.2			54.8921				56.8604				17.9979				37.6077				#DIV/0!
70.1				57.851				49.4834				48.4646				48.4646				37.4953					71.3			54.8921				56.8604				17.9979				37.6077				#DIV/0!
70.2				57.851				49.4834				48.4646				48.4646				37.4953					71.4			54.8921				56.8604				17.9979				37.6077				#DIV/0!
70.3				57.851				49.4834				48.4646				48.4646				37.4953					71.5			54.8921				56.8604				17.9979				37.6077				#DIV/0!
70.4				57.851				49.4834				48.4646				48.4646				37.4953					71.6			54.8921				56.8604				17.9979				37.6077				#DIV/0!
70.5				57.851				49.4834				48.4646				48.4646				37.4953					71.7			54.8921				56.8604				17.9979				37.6077				#DIV/0!
70.6				57.851				49.4834				48.4646				48.4646				37.4953					71.8			54.8921				56.8604				17.9979				37.6077				#DIV/0!
70.7				57.851				49.4834				48.4646				48.4646				37.4953					71.9			54.8921				56.8604				17.9979				37.6077				#DIV/0!
70.8				57.851				49.4834				48.4646				48.4646				37.4953					72			54.8921				56.8604				17.9979				37.6077				#DIV/0!
70.9				57.851				49.4834				48.4646				48.4646				37.4953					72.1			54.8921				56.8604				17.9979				37.6077				#DIV/0!
71				57.851				49.4834				48.4646				48.4646				37.4953					72.2			54.8921				56.8604				17.9979				37.6077				#DIV/0!
71.1				57.851				49.4834				48.4646				48.4646				37.4953					72.3			54.8921				56.8604				17.9979				37.6077				#DIV/0!
71.2				57.851				49.4834				48.4646				48.4646				37.4953					72.4			54.8921				56.8604				17.9979				37.6077				#DIV/0!
71.3				57.851				49.4834				48.4646				48.4646				37.4953					72.5			54.8921				56.8604				17.9979				37.6077				#DIV/0!
71.4				57.851				49.4834				48.4646				48.4646				37.4953					72.6			54.8921				56.8604				17.9979				37.6077				#DIV/0!
71.5				57.851				49.4834				48.4646				48.4646				37.4953					72.7			54.8921				56.8604				17.9979				37.6077				#DIV/0!
71.6				57.851				49.4834				48.4646				48.4646				37.4953					72.8			54.8921				56.8604				17.9979				37.6077				#DIV/0!
71.7				57.851				49.4834				48.4646				48.4646				37.4953					72.9			54.8921				56.8604				17.9979				37.6077				#DIV/0!
71.8				57.851				49.4834				48.4646				48.4646				37.4953					73			54.8921				56.8604				17.9979				37.6077				#DIV/0!
71.9				57.851				49.4834				48.4646				48.4646				37.4953					73.1			54.8921				56.8604				17.9979				37.6077				#DIV/0!
72				57.851				49.4834				48.4646				48.4646				37.4953					73.2			54.8921				56.8604				17.9979				37.6077				#DIV/0!
72.1				57.851				49.4834				48.4646				48.4646				37.4953					73.3			54.8921				56.8604				17.9979				37.6077				#DIV/0!
72.2				57.851				49.4834				48.4646				48.4646				37.4953					73.4			54.8921				56.8604				17.9979				37.6077				#DIV/0!
72.3				57.851				49.4834				48.4646				48.4646				37.4953					73.5			54.8921				56.8604				17.9979				37.6077				#DIV/0!
72.4				57.851				49.4834				48.4646				48.4646				37.4953					73.6			54.8921				56.8604				17.9979				37.6077				#DIV/0!
72.5				57.851				49.4834				48.4646				48.4646				37.4953					73.7			54.8921				56.8604				17.9979				37.6077				#DIV/0!
72.6				57.851				49.4834				48.4646				48.4646				37.4953					73.8			54.8921				56.8604				17.9979				37.6077				#DIV/0!
72.7				57.851				49.4834				48.4646				48.4646				37.4953					73.9			54.8921				56.8604				17.9979				37.6077				#DIV/0!
72.8				57.851				49.4834				48.4646				48.4646				37.4953					74			54.8921				56.8604				17.9979				37.6077				#DIV/0!
72.9				57.851				49.4834				48.4646				48.4646				37.4953					74.1			54.8921				56.8604				17.9979				37.6077				#DIV/0!
73				57.851				49.4834				48.4646				48.4646				37.4953					74.2			54.8921				56.8604				17.9979				37.6077				#DIV/0!
73.1				57.851				49.4834				48.4646				48.4646				37.4953					74.3			54.8921				56.8604				17.9979				37.6077				#DIV/0!
73.2				57.851				49.4834				48.4646				48.4646				37.4953					74.4			54.8921				56.8604				17.9979				37.6077				#DIV/0!
73.3				57.851				49.4834				48.4646				48.4646				37.4953					74.5			54.8921				56.8604				17.9979				37.6077				#DIV/0!
73.4				57.851				49.4834				48.4646				48.4646				37.4953					74.6			54.8921				56.8604				17.9979				37.6077				#DIV/0!
73.5				57.851				49.4834				48.4646				48.4646				37.4953					74.7			54.8921				56.8604				17.9979				37.6077				#DIV/0!
73.6				57.851				49.4834				48.4646				48.4646				37.4953					74.8			54.8921				56.8604				17.9979				37.6077				#DIV/0!
73.7				57.851				49.4834				48.4646				48.4646				37.4953					74.9			54.8921				56.8604				17.9979				37.6077				#DIV/0!
73.8				57.851				49.4834				48.4646				48.4646				37.4953					75			54.8921				56.8604				17.9979				37.6077				#DIV/0!
73.9				57.851				49.4834				48.4646				48.4646				37.4953					75.1			54.8921				56.8604				17.9979				37.6077				#DIV/0!
74				57.851				49.4834				48.4646				48.4646				37.4953					75.2			54.8921				56.8604				17.9979				37.6077				#DIV/0!
74.1				57.851				49.4834				48.4646				48.4646				37.4953					75.3			54.8921				56.8604				17.9979				37.6077				#DIV/0!
74.2				57.851				49.4834				48.4646				48.4646				37.4953					75.4			54.8921				56.8604				17.9979				37.6077				#DIV/0!
74.3				57.851				49.4834				48.4646				48.4646				37.4953					75.5			54.8921				56.8604				17.9979				37.6077				#DIV/0!
74.4				57.851				49.4834				48.4646				48.4646				37.4953					75.6			54.8921				56.8604				17.9979				37.6077				#DIV/0!
74.5				57.851				49.4834				48.4646				48.4646				37.4953					75.7			54.8921				56.8604				17.9979				37.6077				#DIV/0!
74.6				57.851				49.4834				48.4646				48.4646				37.4953					75.8			54.8921				56.8604				17.9979				37.6077				#DIV/0!
74.7				57.851				49.4834				48.4646				48.4646				37.4953					75.9			54.8921				56.8604				17.9979				37.6077				#DIV/0!
74.8				57.851				49.4834				48.4646				48.4646				37.4953					76			54.8921				56.8604				17.9979				37.6077				#DIV/0!
74.9				57.851				49.4834				48.4646				48.4646				37.4953					76.1			54.8921				56.8604				17.9979				37.6077				#DIV/0!
75				57.851				49.4834				48.4646				48.4646				37.4953					76.2			54.8921				56.8604				17.9979				37.6077				#DIV/0!
75.1				57.851				49.4834				48.4646				48.4646				37.4953					76.3			54.8921				56.8604				17.9979				37.6077				#DIV/0!
75.2				57.851				49.4834				48.4646				48.4646				37.4953					76.4			54.8921				56.8604				17.9979				37.6077				#DIV/0!
75.3				57.851				49.4834				48.4646				48.4646				37.4953					76.6			54.8921				56.8604				17.9979				37.6077				#DIV/0!
75.4				57.851				49.4834				48.4646				48.4646				37.4953					76.7			54.8921				56.8604				17.9979				37.6077				#DIV/0!
75.5				57.851				49.4834				48.4646				48.4646				37.4953					76.8			54.8921				56.8604				17.9979				37.6077				#DIV/0!
75.6				57.851				49.4834				48.4646				48.4646				37.4953					75.6			54.8921				56.8604				17.9979				37.6077				#DIV/0!
75.7				57.851				49.4834				48.4646				48.4646				37.4953					75.7			54.8921				56.8604				17.9979				37.6077				#DIV/0!
75.8				57.851				49.4834				48.4646				48.4646				37.4953					75.8			54.8921				56.8604				17.9979				37.6077				#DIV/0!
75.9				57.851				49.4834				48.4646				48.4646				37.4953					75.9			54.8921				56.8604				17.9979				37.6077				#DIV/0!
76																									76			54.8921				56.8604				17.9979
76.1																									76.1
76.2																									76.2
76.3																									76.3
76.4																									76.4
76.6																									76.6
76.7																									76.7
76.8																									76.8
Time	Col-0 + BL	SE Col-0 + BL	bri1-301 + BL	bri1-301 + BL SE
5	106.894	1.69389	111.787	0.64533					Values that are shown in Fig. 7C
10	101.26	1.9261	110.362	0.65781
15	97.8144	2.49262	106.142	0.99809					The RAW values can be found in the tables above, B1006 (106,3938) can be found in cell CL260
20	94.6245	2.05813	106.217	0.74093
[truncated: 64 more columns]

## Sheet: 7D
time	wt data	wt err	bri1-301 data	bri1-301 err
0	5.42376	0.02437		--			Shown values of Fig. 7D
	--	--	5.42376	0.02437
5	5.24729	0.04704	--	--			Error is StDev
	--	--	5.3234	0.00351
10	5.14873	0.06523	--	--
	--	--	5.26791	0.01425
15	5.10273	0.05462	--	--
	--	--	5.23908	0.0194
20	5.08051	0.04251	--	--
			5.22545	0.02115
Simulation results of 10 models (structurally identical but independent parameterizations). Numbers correspond to the number of the model (internal numbering)
normal BRI1 activity	Modell #
Time [min]	3	6	14	23	34	38	40	45	47	50		mean	std
0	5.43694	5.43116	5.35568	5.42505	5.43214	5.43776	5.42776	5.42512	5.4295	5.43649		5.42376	0.0243678
5	5.26305	5.25845	5.1138	5.2642	5.25848	5.26513	5.26687	5.26414	5.25558	5.2632		5.24729	0.0470355
10	5.16961	5.16456	4.9635	5.17312	5.16489	5.17126	5.17581	5.17307	5.16211	5.1694		5.14873	0.0652281
15	5.12144	5.11575	4.94757	5.12192	5.11663	5.12245	5.12462	5.12189	5.11393	5.12111		5.10273	0.0546241
20	5.09685	5.09059	4.95978	5.09339	5.09199	5.09729	5.0961	5.09337	5.08935	5.09642		5.08051	0.0425092
60	5.08781	5.08092	5.06268	5.06645	5.08287	5.08755	5.06917	5.06647	5.08057	5.08718		5.07717	0.00990306
bri1-301	Modell #
Time [min]	3	6	14	23	34	38	40	45	47	50
0	5.43694	5.43116	5.35568	5.42505	5.43214	5.43776	5.42776	5.42512	5.4295	5.43649		5.42376	0.0243678
5	5.32484	5.32001	5.32921	5.32271	5.32024	5.32663	5.32538	5.32267	5.31743	5.32492		5.3234	0.00350588
10	5.26478	5.25969	5.3073	5.26543	5.26005	5.26632	5.26812	5.26541	5.25738	5.26459		5.26791	0.0142501
15	5.23509	5.22954	5.29365	5.23364	5.23027	5.23615	5.23634	5.23364	5.22771	5.23473		5.23908	0.0193962
20	5.22205	5.21605	5.28514	5.21748	5.21718	5.22265	5.22019	5.21749	5.2147	5.22158		5.22545	0.0211454
60	5.2298	5.22342	5.28404	5.21161	5.22485	5.22994	5.21433	5.21167	5.2227	5.22916		5.22815	0.0208959
