# Supplementary material for: Computational modeling and quantitative physiology reveal central parameters for brassinosteroid-regulated early cell physiological processes linked to elongation growth of the Arabidopsis root
Source: eLife. 2022 Sep 7;11:e73031. doi: 10.7554/eLife.73031 (PMC9525061; doi:10.7554/eLife.73031)
Supplement: Figure 8—source data 1. [file elife-73031-fig8-data1.xlsx]

## Sheet: 8A
BL [nM]	Caesar et al.	Caesar et al. Err	Data fitted pH	Data fitted pH Err
10	-128.2	2					Values that are shown in Fig. 8A
			-155.199	0.70045
50	-128.1	1.2
			-189.363	17.3548
100	-131.8	2.6
			-193.496	17.2063
Data fitted pH are based on models without CNGC10 or K+ , where pH Data for the parameter estimation were used to calculate the membrane potential (shown are 5 out of 10 models; numbers are equal to internal numbering)
	without CNGC10 or Potassium in the model
									Standardabweichung
dose BL [nM]	1	2	3	4	9			mean	n-1	n
0	-121.008	-120.908	-121.006	-121.011	-120.985			-120.984	0.0434891	0.0388978
10	-154.325	-154.867	-155.022	-155.662	-156.117			-155.199	0.70045	0.626502
50	-210.437	-186.723	-174.559	-203.795	-171.301			-189.363	17.3548	15.5226
100	-216.128	-186.724	-182.792	-206.703	-175.134			-193.496	17.2063	15.3898
* Experimental data are based on experiments from Caesar et al. (2011)

## Sheet: 8B
BL [nM]	Caesar et al.	Caesar et al. Err	Data fitted Em	Data fitted Em Err
10	-128.2	2					Values that are shown in Fig. 8B
			-128.665	0.74059
50	-128.1	1.2
			-129.672	0.49175
100	-131.8	2.6
			-129.625	0.48346
Simulation results of 10 models (structurally identical but independent parameterizations). Numbers correspond to the number of the model (internal numbering)
with CNGC10 and Potassium in the model
	Model #													Standardabweichung
dose BL [nM]	3	6	14	23	34	38	40	45	47	50			mean	n-1	n
0	-120.706	-120.722	-120.554	-120.726	-120.704	-120.71	-120.725	-120.724	-120.708	-120.706			-120.698	0.0515391	0.0488943
10	-128.937	-128.958	-126.561	-128.825	-128.923	-128.894	-128.847	-128.845	-128.946	-128.911			-128.665	0.740589	0.702585
50	-129.777	-129.697	-131.011	-129.351	-129.5	-129.561	-129.322	-129.402	-129.556	-129.538			-129.672	0.491746	0.466511
100	-129.675	-129.575	-130.972	-129.374	-129.426	-129.524	-129.336	-129.431	-129.465	-129.468			-129.625	0.483462	0.458652
* Experimental data are based on experiments from Caesar et al. (2011) ; see also Fig. 8A

## Sheet: 8C
Mating based split ubiqiutin assay

## Sheet: 8D
Representative confocal images of transiently transformed tobacco epidermal leaf cells expressing the indicated fusion proteins.

## Sheet: 8E
Sample	FLT [ns]	Stdev
CNGC10-GFP	2.49995	0.032264
with AHA2-RFP	2.39712	0.0612777				Values that are shown in Fig. 8E
with BRI1-RFP	2.27792	0.0654963
withh BAK1-mCherry	2.26422	0.0996973
	CNGC10 GFP	CNGC10 GFP AHA2 RFP	CNGC10 GFP BRI1 RFP	CNGC10-GFP BAK1-mCherry
	2.4688	2.486	2.354	2.313
	2.5072	2.472	2.294	2.176
	2.4781	2.4957	2.26	2.114
	2.461	2.35	2.346	2.14
	2.458	2.359	2.362	2.12
	2.462	2.368	2.266	2.2739
	2.4859	2.436	2.355	2.294			RAW Data for Fig. 8E ; based on several days of measurement
	2.463	2.428	2.3483	2.202			In the manuscript the averaged values are shown; error is standard deviation
	2.464	2.365	2.3531	2.167
	2.49	2.364	2.3026	2.3
	2.475	2.3	2.212	2.14
	2.484	2.3	2.14	2.181
	2.49	2.331	2.192	2.13
	2.477	2.313	2.3	2.31
	2.479	2.39	2.2607	2.3
	2.5268	2.371	2.2571	2.34
	2.5	2.48	2.222	2.33
	2.485	2.468	2.2836	2.319
	2.483	2.5	2.173	2.3692
	2.5138	2.417	2.277	2.345
	2.47	2.46		2.427
	2.5326	2.4715		2.386
	2.514	2.488		2.4
	2.5144	2.48
	2.53	2.411
	2.55	2.384
	2.512	2.389
	2.522	2.34
	2.541	2.36
	2.499	2.345
	2.51	2.358
	2.472	2.351
	2.491	2.369
	2.52	2.346
	2.428	2.353
	2.5725
	2.572
	2.492
	2.524
	2.549
	2.531
MW	2.49995	2.39712	2.27792	2.26422
Stabw	0.032264	0.0612777	0.0654963	0.0996973
Stdfehler	0.016132	0.0306388	0.0463129	0.0704966
Statistics for Data of Fig. 8E
Data is not normally distrubuted (Shapiro-Wilk Test)
Kruskal Wallis Test needs to be applied. Shows significant differences. Steel-Dwass Post hoc test, shown below, point out comparisions between all groups. The exact p-values are reported.
							Exact p-Values are reported here

## Sheet: 8F
Sample	Aver	Err
Col Mock ME	100	17.0566		Values that are shown in Fig. 8F
Col Mock EE	100	22.3668
Col BL ME	89.0566	24.1993
Col BL EE	73.7473	18.8322
cngc10-1 mock ME	100	22.4234
cngc10-1 mock EE	100	25.8205
cngc10-1 BL ME	95.5913	18.1257
cngc10-1 BL EE	89.8285	30.3739
cngc10-2 mock ME	100	16.7233
cngc10-2 mock EE	100	14.3377
cngc10-2 BL ME	93.2525	19.2623
cngc10-2 BL EE	89.1315	30.1596
Col-0 Data
Day 1	Col0 mock Meristem	Col0 mock meristem relative	Col0 mock Early Elongation	Col mock earyl elongation relative		Col0 BL Meristem	Col0 BL meristem relative to mock col0 meristem	Col0 BL Early elongation	Col0 BL early elongation zone relative to mock col0 early elongation
	Raw data	Raw data converted to relative fraction of raw data mean	Raw data	Raw data converted to relative fraction of raw data mean			Raw data converted to relative fraction of mock treatment raw data mean		Raw data converted to relative fraction of mock treatment raw data mean												Several days of measurements (in total 9)
	0.67	83.1266	0.543	65.2383		0.444	55.0868	0.435	52.2627												Per day and condition at least 3 replicates were measured (e.g. B22-B24)
	0.91	112.903	0.894	107.409		0.433	53.7221	0.331	39.7677
	0.838	103.97	1.06	127.353		0.512	63.5236	0.471	56.5879												RAW data of each day are averaged and the average of the mock treatments are set to 100 percent
																					Based on this, the relative values are calculated .
Average	0.806	100	0.832333	100		0.463	57.4442	0.412333	49.5394
Standard error o. t. mean	0.0711056	8.82203	0.152397	18.3096		0.0247049	3.06513	0.0419735	5.04288												Error here is Std-Err
																					Formulas are exemplarily shown only for Day1 of Col-0 data.
																					Procedure is the same for all genotypes.
Day 2	Col0 mock Meristem	Col0 mock meristem relative	Col0 mock Early Elongation	Col mock earyl elongation relative		Col0 BL Meristem	Col0 BL meristem relative to mock col0 meristem	Col0 BL Early elongation	Col0 BL early elongation zone relative to mock col0 early elongation
	Raw data	Raw data converted to relative fraction of raw data mean	Raw data	Raw data converted to relative fraction of raw data mean			Raw data converted to relative fraction of mock treatment raw data mean		Raw data converted to relative fraction of mock treatment raw data mean
	0.554	65.3816	0.425	68.2914		0.627	73.9969	0.53	85.1634
	0.917	108.222	0.594	95.4472		0.785	92.6436	0.459	73.7547
	1.071	126.397	0.848	136.261		0.58	68.45	0.409	65.7204
Average	0.847333	100	0.622333	100		0.664	78.3635	0.466	74.8795
Standard error o. t. mean	0.153256	18.0869	0.122929	19.7529		0.0620027	7.31739	0.0351046	5.6408
Day 3	Col0 mock Meristem	Col0 mock meristem relative	Col0 mock Early Elongation	Col mock earyl elongation relative		Col0 BL Meristem	Col0 BL meristem relative to mock col0 meristem	Col0 BL Early elongation	Col0 BL early elongation zone relative to mock col0 early elongation
	Raw data	Raw data converted to relative fraction of raw data mean	Raw data	Raw data converted to relative fraction of raw data mean			Raw data converted to relative fraction of mock treatment raw data mean		Raw data converted to relative fraction of mock treatment raw data mean
	0.551	84.2508	0.923	103.669		0.535	81.8043	0.397	44.59
	0.68	103.976	0.769	86.3721		0.626	95.7187	0.521	58.5174
	0.731	111.774	0.979	109.959		0.639	97.7064	0.579	65.0318
Average	0.654	100	0.890333	100		0.6	91.7431	0.499	56.0464
Standard error o. t. mean	0.053563	8.19007	0.0627836	7.05169		0.0327159	5.00244	0.0536781	6.02898
Day 4	Col0 mock Meristem	Col0 mock meristem relative	Col0 mock Early Elongation	Col mock earyl elongation relative		Col0 BL Meristem	Col0 BL meristem relative to mock col0 meristem	Col0 BL Early elongation	Col0 BL early elongation zone relative to mock col0 early elongation
	Raw data	Raw data converted to relative fraction of raw data mean	Raw data	Raw data converted to relative fraction of raw data mean			Raw data converted to relative fraction of mock treatment raw data mean		Raw data converted to relative fraction of mock treatment raw data mean
	0.487	90.8017	0.49	68.0871		0.489	91.1746	0.511	71.0051
	0.549	102.362	0.753	104.632		0.524	97.7004	0.489	67.9481
	0.573	106.837	0.916	127.281		0.619	115.413	0.661	91.8481
Average	0.536333	100	0.719667	100		0.544	101.429	0.553667	76.9338
Standard error o. t. mean	0.0256212	4.7771	0.1241	17.2441		0.0388373	7.24126	0.0540411	7.50919
Day 5	Col0 mock Meristem	Col0 mock meristem relative	Col0 mock Early Elongation	Col mock earyl elongation relative		Col0 BL Meristem	Col0 BL meristem relative to mock col0 meristem	Col0 BL Early elongation	Col0 BL early elongation zone relative to mock col0 early elongation
	Raw data	Raw data converted to relative fraction of raw data mean	Raw data	Raw data converted to relative fraction of raw data mean			Raw data converted to relative fraction of mock treatment raw data mean		Raw data converted to relative fraction of mock treatment raw data mean
	0.316	92.7593	0.318	94.9254		0.179	52.544	0.13	38.806
	0.381	111.84	0.361	107.761		0.187	54.8924	0.176	52.5373
	0.325	95.4012	0.326	97.3134		0.224	65.7534	0.204	60.8955
Average	0.340667	100	0.335	100		0.196667	57.7299	0.17	50.7463
Standard error o. t. mean	0.0203333	5.96869	0.0132035	3.94135		0.0138604	4.06862	0.0215716	6.43928
Day 6	Col0 mock Meristem	Col0 mock meristem relative	Col0 mock Early Elongation	Col mock earyl elongation relative		Col0 BL Meristem	Col0 BL meristem relative to mock col0 meristem	Col0 BL Early elongation	Col0 BL early elongation zone relative to mock col0 early elongation
	Raw data	Raw data converted to relative fraction of raw data mean	Raw data	Raw data converted to relative fraction of raw data mean			Raw data converted to relative fraction of mock treatment raw data mean		Raw data converted to relative fraction of mock treatment raw data mean
	0.322	77.0335	0.577	105.807		0.446	106.699	0.442	81.0513
	0.373	89.2344	0.497	91.1369		0.428	102.392	0.502	92.0538
	0.559	133.732	0.562	103.056		0.457	109.33	0.458	83.9853
Average	0.418	100	0.545333	100		0.443667	106.14	0.467333	85.6968
Standard error o. t. mean	0.0720208	17.2299	0.0245515	4.50211		0.00845248	2.02212	0.0179382	3.28939
Day 7	Col0 mock Meristem	Col0 mock meristem relative	Col0 mock Early Elongation	Col mock earyl elongation relative		Col0 BL Meristem	Col0 BL meristem relative to mock col0 meristem	Col0 BL Early elongation	Col0 BL early elongation zone relative to mock col0 early elongation
	Raw data	Raw data converted to relative fraction of raw data mean	Raw data	Raw data converted to relative fraction of raw data mean			Raw data converted to relative fraction of mock treatment raw data mean		Raw data converted to relative fraction of mock treatment raw data mean
	0.401	70.9735	0.475	76.4895		0.544	96.2832	0.479	77.1337
	0.754	133.451	0.705	113.527		0.544	96.2832	0.564	90.8213
	0.54	95.5752	0.683	109.984		0.575	101.77	0.647	104.187
Average	0.565	100	0.621	100		0.554333	98.1121	0.563333	90.7139
Standard error o. t. mean	0.102666	18.171	0.0732757	11.7996		0.0103333	1.82891	0.0484986	7.80975
Day 8	Col0 mock Meristem	Col0 mock meristem relative	Col0 mock Early Elongation	Col mock earyl elongation relative		Col0 BL Meristem	Col0 BL meristem relative to mock col0 meristem	Col0 BL Early elongation	Col0 BL early elongation zone relative to mock col0 early elongation
	Raw data	Raw data converted to relative fraction of raw data mean	Raw data	Raw data converted to relative fraction of raw data mean			Raw data converted to relative fraction of mock treatment raw data mean		Raw data converted to relative fraction of mock treatment raw data mean
	0.42	88.9831	0.736	87.2038		0.497	105.297	0.844	100
	0.565	119.703	1.326	157.109		0.735	155.72	0.617	73.1043
	0.431	91.3136	0.47	55.6872		0.595	126.059	0.73	86.4929
Average	0.472	100	0.844	100		0.609	129.025	0.730333	86.5324
Standard error o. t. mean	0.0466083	9.87464	0.252937	29.9689		0.0690604	14.6314	0.0655295	7.76415
Day 9	Col0 mock Meristem	Col0 mock meristem relative	Col0 mock Early Elongation	Col mock earyl elongation relative		Col0 BL Meristem	Col0 BL meristem relative to mock col0 meristem	Col0 BL Early elongation	Col0 BL early elongation zone relative to mock col0 early elongation
	Raw data	Raw data converted to relative fraction of raw data mean	Raw data	Raw data converted to relative fraction of raw data mean			Raw data converted to relative fraction of mock treatment raw data mean		Raw data converted to relative fraction of mock treatment raw data mean
	0.498	99.6664	0.414	93.3133		0.368	73.6491	0.387	87.2276
	0.48	96.064	0.484	109.091		0.439	87.8586	0.398	89.707
	0.521	104.27	0.433	97.5958		0.415	83.0554	0.448	100.977
Average	0.499667	100	0.443667	100		0.407333	81.521	0.411	92.6371
Standard error o. t. mean	0.011865	2.37458	0.0208992	4.71057		0.0208513	4.17305	0.0187705	4.23078
cngc10-1 Data
Day 1	Salk_015952 mock Meristem	Salk_015952 mock meristem relative	Salk_015952 mock Early Elongation	Salk_015952 mock earyl elongation relative		Salk_015952 BL Meristem	Salk_015952 BL meristem relative to mock Salk_015952 meristem	Salk_015952 BL Early elongation	Salk_015952 BL early elongation zone relative to mock Salk_015952 early elongation
	Raw data	Raw data converted to relative fraction of raw data mean	Raw data	Raw data converted to relative fraction of raw data mean			Raw data converted to relative fraction of mock treatment raw data mean		Raw data converted to relative fraction of mock treatment raw data mean
	0.541	86.1465	0.44	50.7107		0.584	92.9936	0.463	53.3615
	0.673	107.166	0.923	106.377		0.587	93.4713	0.491	56.5886
	0.67	106.688	1.24	142.912		0.703	111.943	0.581	66.9612
Average	0.628	100	0.867667	100		0.624667	99.4692	0.511667	58.9704
Standard error o. t. mean	0.0435086	6.92812	0.232591	26.8065		0.0391762	6.23825	0.0355965	4.10256
Day 2	Salk_015952 mock Meristem	Salk_015952 mock meristem relative	Salk_015952 mock Early Elongation	Salk_015952 mock earyl elongation relative		Salk_015952 BL Meristem	Salk_015952 BL meristem relative to mock Salk_015952 meristem	Salk_015952 BL Early elongation	Salk_015952 BL early elongation zone relative to mock Salk_015952 early elongation
	Raw data	Raw data converted to relative fraction of raw data mean	Raw data	Raw data converted to relative fraction of raw data mean			Raw data converted to relative fraction of mock treatment raw data mean		Raw data converted to relative fraction of mock treatment raw data mean
	0.524	66.1895	0.452	83.1392		0.624	78.8211	0.549	100.981
	0.876	110.653	0.4	73.5745		0.686	86.6526	0.443	81.4838
	0.975	123.158	0.779	143.286		0.783	98.9053	0.537	98.7738
Average	0.791667	100	0.543667	100		0.697667	88.1263	0.509667	93.7462
Standard error o. t. mean	0.136851	17.2864	0.11862	21.8186		0.0462685	5.84445	0.0335128	6.16423
Day 3	Salk_015952 mock Meristem	Salk_015952 mock meristem relative	Salk_015952 mock Early Elongation	Salk_015952 mock earyl elongation relative		Salk_015952 BL Meristem	Salk_015952 BL meristem relative to mock Salk_015952 meristem	Salk_015952 BL Early elongation	Salk_015952 BL early elongation zone relative to mock Salk_015952 early elongation
	Raw data	Raw data converted to relative fraction of raw data mean	Raw data	Raw data converted to relative fraction of raw data mean			Raw data converted to relative fraction of mock treatment raw data mean		Raw data converted to relative fraction of mock treatment raw data mean
	0.664	78.0259	0.623	71.9756		0.513	60.282	0.413	47.7141
	1.292	151.821	0.972	112.296		0.564	66.275	0.472	54.5305
	1.042	122.444	1.008	116.455		0.687	80.7286	0.546	63.0797
	1.284	150.881	1.085	125.351		0.585	68.7427	0.501	57.8808
	0.481	56.5217	0.517	59.7293		0.747	87.7791	0.775	89.5362
	0.579	68.0376	0.625	72.2066		0.793	93.1845	0.755	87.2256
	0.615	72.2679	1.229	141.987
Average	0.851	100	0.865571	100		0.648167	76.1653	0.577	66.6612
Standard error o. t. mean	0.130931	15.3855	0.103517	11.9593		0.0453126	5.32462	0.0620607	7.16991
Day 4	Salk_015952 mock Meristem	Salk_015952 mock meristem relative	Salk_015952 mock Early Elongation	Salk_015952 mock earyl elongation relative		Salk_015952 BL Meristem	Salk_015952 BL meristem relative to mock Salk_015952 meristem	Salk_015952 BL Early elongation	Salk_015952 BL early elongation zone relative to mock Salk_015952 early elongation
	Raw data	Raw data converted to relative fraction of raw data mean	Raw data	Raw data converted to relative fraction of raw data mean			Raw data converted to relative fraction of mock treatment raw data mean		Raw data converted to relative fraction of mock treatment raw data mean
	0.472	82.3735	0.58	70.6742		0.531	92.6702	0.437	53.2494
	0.568	99.1274	1.099	133.916		0.585	102.094	0.815	99.3095
	0.679	118.499	0.783	95.4102		0.507	88.4817	0.543	66.1657
Average	0.573	100	0.820667	100		0.541	94.4154	0.598333	72.9082
Standard error o. t. mean	0.059808	10.4377	0.151001	18.3999		0.0230651	4.02533	0.112572	13.7171
Day 5	Salk_015952 mock Meristem	Salk_015952 mock meristem relative	Salk_015952 mock Early Elongation	Salk_015952 mock earyl elongation relative		Salk_015952 BL Meristem	Salk_015952 BL meristem relative to mock Salk_015952 meristem	Salk_015952 BL Early elongation	Salk_015952 BL early elongation zone relative to mock Salk_015952 early elongation
	Raw data	Raw data converted to relative fraction of raw data mean	Raw data	Raw data converted to relative fraction of raw data mean			Raw data converted to relative fraction of mock treatment raw data mean		Raw data converted to relative fraction of mock treatment raw data mean
	0.217	81.9899	0.179	82.4885		0.21	79.3451	0.276	127.189
	0.249	94.0806	0.227	104.608		0.228	86.1461	0.26	119.816
	0.328	123.929	0.245	112.903		0.259	97.8589	0.268	123.502
Average	0.264667	100	0.217	100		0.232333	87.7834	0.268	123.502
Standard error o. t. mean	0.0329865	12.4634	0.0196977	9.07729		0.0143101	5.40682	0.0046188	2.12848
Day 6	Salk_015952 mock Meristem	Salk_015952 mock meristem relative	Salk_015952 mock Early Elongation	Salk_015952 mock earyl elongation relative		Salk_015952 BL Meristem	Salk_015952 BL meristem relative to mock Salk_015952 meristem	Salk_015952 BL Early elongation	Salk_015952 BL early elongation zone relative to mock Salk_015952 early elongation
	Raw data	Raw data converted to relative fraction of raw data mean	Raw data	Raw data converted to relative fraction of raw data mean			Raw data converted to relative fraction of mock treatment raw data mean		Raw data converted to relative fraction of mock treatment raw data mean
	0.344	78.3005	0.468	80.2744		0.384	87.4052	0.378	64.837
	0.468	106.525	0.733	125.729		0.417	94.9165	0.361	61.9211
	0.506	115.175	0.548	93.9966		0.368	83.7633	0.485	83.1904
Average	0.439333	100	0.583	100		0.389667	88.695	0.408	69.9828
Standard error o. t. mean	0.0489126	11.1334	0.078475	13.4606		0.0144261	3.28362	0.0388115	6.65721
Day 7	Salk_015952 mock Meristem	Salk_015952 mock meristem relative	Salk_015952 mock Early Elongation	Salk_015952 mock earyl elongation relative		Salk_015952 BL Meristem	Salk_015952 BL meristem relative to mock Salk_015952 meristem	Salk_015952 BL Early elongation	Salk_015952 BL early elongation zone relative to mock Salk_015952 early elongation
	Raw data	Raw data converted to relative fraction of raw data mean	Raw data	Raw data converted to relative fraction of raw data mean			Raw data converted to relative fraction of mock treatment raw data mean		Raw data converted to relative fraction of mock treatment raw data mean
	0.453	87.5644	0.549	70.3846		0.481	92.9768	0.383	49.1026
	0.568	109.794	0.963	123.462		0.557	107.668	0.943	120.897
	0.531	102.642	0.828	106.154		0.744	143.814	0.973	124.744
Average	0.517333	100	0.78	100		0.594	114.82	0.766333	98.2479
Standard error o. t. mean	0.0338936	6.5516	0.121897	15.6279		0.078143	15.105	0.191862	24.5977
Day 8	Salk_015952 mock Meristem	Salk_015952 mock meristem relative	Salk_015952 mock Early Elongation	Salk_015952 mock earyl elongation relative		Salk_015952 BL Meristem	Salk_015952 BL meristem relative to mock Salk_015952 meristem	Salk_015952 BL Early elongation	Salk_015952 BL early elongation zone relative to mock Salk_015952 early elongation
	Raw data	Raw data converted to relative fraction of raw data mean	Raw data	Raw data converted to relative fraction of raw data mean			Raw data converted to relative fraction of mock treatment raw data mean		Raw data converted to relative fraction of mock treatment raw data mean
	0.404	88.5318	0.356	83.3073		0.481	105.405	0.593	138.768
	0.429	94.0102	0.353	82.6053		0.587	128.634	0.539	126.131
	0.536	117.458	0.573	134.087		0.546	119.649	0.547	128.003
Average	0.456333	100	0.427333	100		0.538	117.896	0.559667	130.967
Standard error o. t. mean	0.0404818	8.87111	0.0728385	17.0449		0.0308599	6.76258	0.0168259	3.93742
Day 9	Salk_015952 mock Meristem	Salk_015952 mock meristem relative	Salk_015952 mock Early Elongation	Salk_015952 mock earyl elongation relative		Salk_015952 BL Meristem	Salk_015952 BL meristem relative to mock Salk_015952 meristem	Salk_015952 BL Early elongation	Salk_015952 BL early elongation zone relative to mock Salk_015952 early elongation
	Raw data	Raw data converted to relative fraction of raw data mean	Raw data	Raw data converted to relative fraction of raw data mean			Raw data converted to relative fraction of mock treatment raw data mean		Raw data converted to relative fraction of mock treatment raw data mean
	0.469	98.9451	0.385	100.61		0.527	111.181	0.527	137.718
	0.474	100	0.387	101.132		0.53	111.814	0.385	100.61
	0.479	101.055	0.376	98.2578		0.541	114.135	0.427	111.585
Average	0.474	100	0.382667	100		0.532667	112.377	0.446333	116.638
Standard error o. t. mean	0.00288675	0.609019	0.00338296	0.88405		0.00425572	0.89783	0.0421162	11.006
cngc10-2 Data
Day 1	Salk_071112 mock Meristem	Salk_071112 mock meristem relative	Salk_071112 mock Early Elongation	Salk_071112 mock earyl elongation relative		Salk_071112 BL Meristem	Salk_071112 BL meristem relative to mock Salk_071112 meristem	Salk_071112 BL Early elongation	Salk_071112 BL early elongation zone relative to mock Salk_071112 early elongation
	Raw data	Raw data converted to relative fraction of raw data mean	Raw data	Raw data converted to relative fraction of raw data mean			Raw data converted to relative fraction of mock treatment raw data mean		Raw data converted to relative fraction of mock treatment raw data mean
	0.506	89.2941	0.972	90.2507		0.524	92.4706	0.507	47.0752
	0.505	89.1176	1.046	97.1216		0.52	91.7647	0.464	43.0826
	0.689	121.588	1.213	112.628		0.844	148.941	0.395	36.676
Average	0.566667	100	1.077	100		0.629333	111.059	0.455333	42.2779
Standard error o. t. mean	0.0611673	10.7942	0.0712765	6.61806		0.10734	18.9423	0.0326207	3.02885
Day 2	Salk_071112 mock Meristem	Salk_071112 mock meristem relative	Salk_071112 mock Early Elongation	Salk_071112 mock earyl elongation relative		Salk_071112 BL Meristem	Salk_071112 BL meristem relative to mock Salk_071112 meristem	Salk_071112 BL Early elongation	Salk_071112 BL early elongation zone relative to mock Salk_071112 early elongation
	Raw data	Raw data converted to relative fraction of raw data mean	Raw data	Raw data converted to relative fraction of raw data mean			Raw data converted to relative fraction of mock treatment raw data mean		Raw data converted to relative fraction of mock treatment raw data mean
	0.574	65.1656	0.374	76.587		0.594	67.4361	0.694	142.116
	0.734	83.3302	0.579	118.567		0.693	78.6755	0.444	90.9215
	1.373	155.875	0.575	117.747		0.74	84.0114	0.424	86.8259
	0.77	87.4172	0.411	84.1638		0.539	61.1921	0.376	76.9966
	0.952	108.079	0.452	92.5597		0.782	88.7796	0.474	97.0648
	0.882	100.132	0.539	110.375		0.799	90.7096	0.42	86.0068
Average	0.880833	100	0.488333	100		0.691167	78.4674	0.472	96.6553
Standard error o. t. mean	0.111846	12.6977	0.0359033	7.3522		0.042764	4.85495	0.0462947	9.48015
Day 3	Salk_071112 mock Meristem	Salk_071112 mock meristem relative	Salk_071112 mock Early Elongation	Salk_071112 mock earyl elongation relative		Salk_071112 BL Meristem	Salk_071112 BL meristem relative to mock Salk_071112 meristem	Salk_071112 BL Early elongation	Salk_071112 BL early elongation zone relative to mock Salk_071112 early elongation
	Raw data	Raw data converted to relative fraction of raw data mean	Raw data	Raw data converted to relative fraction of raw data mean			Raw data converted to relative fraction of mock treatment raw data mean		Raw data converted to relative fraction of mock treatment raw data mean
	0.904	83.2924	0.971	90.4939		0.75	69.1032	0.454	42.3113
	1.19	109.644	1.125	104.846		0.886	81.6339	0.858	79.9627
	1.162	107.064	1.123	104.66		0.883	81.3575	0.739	68.8723
Average	1.08533	100	1.073	100		0.839667	77.3649	0.683667	63.7154
Standard error o. t. mean	0.0910262	8.38694	0.0510033	4.75333		0.0448417	4.13161	0.119861	11.1707
Day 4	Salk_071112 mock Meristem	Salk_071112 mock meristem relative	Salk_071112 mock Early Elongation	Salk_071112 mock earyl elongation relative		Salk_071112 BL Meristem	Salk_071112 BL meristem relative to mock Salk_071112 meristem	Salk_071112 BL Early elongation	Salk_071112 BL early elongation zone relative to mock Salk_071112 early elongation
	Raw data	Raw data converted to relative fraction of raw data mean	Raw data	Raw data converted to relative fraction of raw data mean			Raw data converted to relative fraction of mock treatment raw data mean		Raw data converted to relative fraction of mock treatment raw data mean
	0.506	97.8093	0.492	92.5972		0.463	89.4974	0.402	75.6587
	0.526	101.675	0.438	82.4341		0.48	92.7835	0.538	101.255
	0.52	100.515	0.664	124.969		0.546	105.541	0.469	88.2685
Average	0.517333	100	0.531333	100		0.496333	95.9407	0.469667	88.394
Standard error o. t. mean	0.00592546	1.14539	0.0681404	12.8244		0.0253136	4.89309	0.0392612	7.38919
Day 5	Salk_071112 mock Meristem	Salk_071112 mock meristem relative	Salk_071112 mock Early Elongation	Salk_071112 mock earyl elongation relative		Salk_071112 BL Meristem	Salk_071112 BL meristem relative to mock Salk_071112 meristem	Salk_071112 BL Early elongation	Salk_071112 BL early elongation zone relative to mock Salk_071112 early elongation
	Raw data	Raw data converted to relative fraction of raw data mean	Raw data	Raw data converted to relative fraction of raw data mean			Raw data converted to relative fraction of mock treatment raw data mean		Raw data converted to relative fraction of mock treatment raw data mean
	0.202	86.944	0.223	88.7268		0.206	88.6657	0.168	66.8435
	0.197	84.792	0.241	95.8886		0.229	98.5653	0.217	86.3395
	0.298	128.264	0.29	115.385		0.286	123.099	0.31	123.342
Average	0.232333	100	0.251333	100		0.240333	103.443	0.231667	92.1751
Standard error o. t. mean	0.032865	14.1456	0.0200194	7.96529		0.0237791	10.2349	0.0416427	16.5687
Day 6	Salk_071112 mock Meristem	Salk_071112 mock meristem relative	Salk_071112 mock Early Elongation	Salk_071112 mock earyl elongation relative		Salk_071112 BL Meristem	Salk_071112 BL meristem relative to mock Salk_071112 meristem	Salk_071112 BL Early elongation	Salk_071112 BL early elongation zone relative to mock Salk_071112 early elongation
	Raw data	Raw data converted to relative fraction of raw data mean	Raw data	Raw data converted to relative fraction of raw data mean			Raw data converted to relative fraction of mock treatment raw data mean		Raw data converted to relative fraction of mock treatment raw data mean
	0.362	87.2289	0.392	95.0687		0.36	86.747	0.243	58.9329
	0.395	95.1807	0.363	88.0356		0.349	84.0964	0.567	137.51
	0.488	117.59	0.482	116.896		0.393	94.6988	0.537	130.234
Average	0.415	100	0.412333	100		0.367333	88.5141	0.449	108.892
Standard error o. t. mean	0.0377227	9.0898	0.0358252	8.68841		0.0132204	3.18563	0.103363	25.0679
Day 7	Salk_071112 mock Meristem	Salk_071112 mock meristem relative	Salk_071112 mock Early Elongation	Salk_071112 mock earyl elongation relative		Salk_071112 BL Meristem	Salk_071112 BL meristem relative to mock Salk_071112 meristem	Salk_071112 BL Early elongation	Salk_071112 BL early elongation zone relative to mock Salk_071112 early elongation
	Raw data	Raw data converted to relative fraction of raw data mean	Raw data	Raw data converted to relative fraction of raw data mean			Raw data converted to relative fraction of mock treatment raw data mean		Raw data converted to relative fraction of mock treatment raw data mean
	0.457	92.3232	0.656	87.0027		0.468	94.5455	0.558	74.0053
	0.45	90.9091	0.586	77.7188		0.512	103.434	0.698	92.5729
	0.578	116.768	1.02	135.279		0.643	129.899	1.239	164.324
Average	0.495	100	0.754	100		0.541	109.293	0.831667	110.301
Standard error o. t. mean	0.0415492	8.39377	0.134526	17.8417		0.0525579	10.6178	0.207638	27.5382
Day 8	Salk_071112 mock Meristem	Salk_071112 mock meristem relative	Salk_071112 mock Early Elongation	Salk_071112 mock earyl elongation relative		Salk_071112 BL Meristem	Salk_071112 BL meristem relative to mock Salk_071112 meristem	Salk_071112 BL Early elongation	Salk_071112 BL early elongation zone relative to mock Salk_071112 early elongation
	Raw data	Raw data converted to relative fraction of raw data mean	Raw data	Raw data converted to relative fraction of raw data mean			Raw data converted to relative fraction of mock treatment raw data mean		Raw data converted to relative fraction of mock treatment raw data mean
	0.504	100.465	0.516	103.2		0.303	60.3987	0.503	100.6
	0.492	98.0731	0.479	95.8		0.472	94.0864	0.457	91.4
	0.509	101.462	0.505	101		0.508	101.262	0.441	88.2
Average	0.501667	100	0.5	100		0.427667	85.2492	0.467	93.4
Standard error o. t. mean	0.00504425	1.0055	0.0109697	2.19393		0.0631937	12.5968	0.0185831	3.71663
Day 9	Salk_071112 mock Meristem	Salk_071112 mock meristem relative	Salk_071112 mock Early Elongation	Salk_071112 mock earyl elongation relative		Salk_071112 BL Meristem	Salk_071112 BL meristem relative to mock Salk_071112 meristem	Salk_071112 BL Early elongation	Salk_071112 BL early elongation zone relative to mock Salk_071112 early elongation
	Raw data	Raw data converted to relative fraction of raw data mean	Raw data	Raw data converted to relative fraction of raw data mean			Raw data converted to relative fraction of mock treatment raw data mean		Raw data converted to relative fraction of mock treatment raw data mean
	0.476	96.4213	0.382	94.2434		0.473	95.8136	0.319	78.7007
	0.502	101.688	0.384	94.7368		0.466	94.3957	0.407	100.411
	0.503	101.891	0.45	111.02		0.612	123.97	0.476	117.434
Average	0.493667	100	0.405333	100		0.517	104.727	0.400667	98.8487
Standard error o. t. mean	0.00883805	1.79029	0.0223408	5.51171		0.047543	9.63058	0.0454325	11.2087
Based on the converted relative values (yellow marked columns) this table was created
Col Mock ME	Col Mock EE		Col BL ME	Col BL EE		cngc10-1 mock ME	cngc10-1 mock EE		cngc10-1 BL ME	cngc10-1 BL EE		cngc10-2 mock ME	cngc10-2 mock EE		cngc10-2 BL ME	cngc10-2 BL EE
83.1266	65.2383		55.0868	52.2627		86.1465	50.7107		92.9936	53.3615		89.2941	90.2507		92.4706	47.0752
112.903	107.409		53.7221	39.7677		107.166	106.377		93.4713	56.5886		89.1176	97.1216		91.7647	43.0826
103.97	127.353		63.5236	56.5879		106.688	142.912		111.943	66.9612		121.588	112.628		148.941	36.676
65.3816	68.2914		73.9969	85.1634		66.1895	83.1392		78.8211	100.981		65.1656	76.587		67.4361	142.116
108.222	95.4472		92.6436	73.7547		110.653	73.5745		86.6526	81.4838		83.3302	118.567		78.6755	90.9215
126.397	136.261		68.45	65.7204		123.158	143.286		98.9053	98.7738		155.875	117.747		84.0114	86.8259
84.2508	103.669		81.8043	44.59		78.0259	71.9756		60.282	47.7141		87.4172	84.1638		61.1921	76.9966
103.976	86.3721		95.7187	58.5174		151.821	112.296		66.275	54.5305		108.079	92.5597		88.7796	97.0648
111.774	109.959		97.7064	65.0318		122.444	116.455		80.7286	63.0797		100.132	110.375		90.7096	86.0068
90.8017	68.0871		91.1746	71.0051		150.881	125.351		68.7427	57.8808		83.2924	90.4939		69.1032	42.3113
102.362	104.632		97.7004	67.9481		56.5217	59.7293		87.7791	89.5362		109.644	104.846		81.6339	79.9627
106.837	127.281		115.413	91.8481		68.0376	72.2066		93.1845	87.2256		107.064	104.66		81.3575	68.8723
92.7593	94.9254		52.544	38.806		72.2679	141.987		92.6702	53.2494		97.8093	92.5972		89.4974	75.6587
111.84	107.761		54.8924	52.5373		82.3735	70.6742		102.094	99.3095		101.675	82.4341		92.7835	101.255
95.4012	97.3134		65.7534	60.8955		99.1274	133.916		88.4817	66.1657		100.515	124.969		105.541	88.2685
77.0335	105.807		106.699	81.0513		118.499	95.4102		79.3451	127.189		86.944	88.7268		88.6657	66.8435
89.2344	91.1369		102.392	92.0538		81.9899	82.4885		86.1461	119.816		84.792	95.8886		98.5653	86.3395
133.732	103.056		109.33	83.9853		94.0806	104.608		97.8589	123.502		128.264	115.385		123.099	123.342
70.9735	76.4895		96.2832	77.1337		123.929	112.903		87.4052	64.837		87.2289	95.0687		86.747	58.9329
133.451	113.527		96.2832	90.8213		78.3005	80.2744		94.9165	61.9211		95.1807	88.0356		84.0964	137.51
95.5752	109.984		101.77	104.187		106.525	125.729		83.7633	83.1904		117.59	116.896		94.6988	130.234
88.9831	87.2038		105.297	100		115.175	93.9966		92.9768	49.1026		92.3232	87.0027		94.5455	74.0053
119.703	157.109		155.72	73.1043		87.5644	70.3846		107.668	120.897		90.9091	77.7188		103.434	92.5729
91.3136	55.6872		126.059	86.4929		109.794	123.462		143.814	124.744		116.768	135.279		129.899	164.324
99.6664	93.3133		73.6491	87.2276		102.642	106.154		105.405	138.768		100.465	103.2		60.3987	100.6
96.064	109.091		87.8586	89.707		88.5318	83.3073		128.634	126.131		98.0731	95.8		94.0864	91.4
104.27	97.5958		83.0554	100.977		94.0102	82.6053		119.649	128.003		101.462	101		101.262	88.2
						117.458	134.087		111.181	137.718		96.4213	94.2434		95.8136	78.7007
						98.9451	100.61		111.814	100.61		101.688	94.7368		94.3957	100.411
						100	101.132		114.135	111.585		101.891	111.02		123.97	117.434
						101.055	98.2578
Col Mock ME	Col Mock EE		Col BL ME	Col BL EE		cngc10-1 mock ME	cngc10-1 mock EE		cngc10-1 BL ME	cngc10-1 BL EE		cngc10-2 mock ME	cngc10-2 mock EE		cngc10-2 BL ME	cngc10-2 BL EE
100	100		89.0566	73.7473		100	100		95.5913	89.8285		100	100		93.2525	89.1315
17.0566	22.3668		24.1993	18.8322		22.4234	25.8205		18.1257	30.3739		16.7233	14.3377		19.2623	30.1596
The green marked values here are the values that are shown in the manuscript
Error is Standard Deviation
Statistics for Data of Fig. 8F
The groups are compared seperately (e.g. Col-0 mock Meristem is only compared to Col-0 BL meristem)
Col-0 mock meristem vs. Col-0 BL meristem
Data is normally distrubuted (Shapiro-Wilk Test), variances are equal (Levene Test); pooled two-tailed t-Test is allowed
Col-0 mock early elongation vs. Col-0 BL early elongation
Data is normally distrubuted (Shapiro-Wilk Test), variances are equal (Levene Test); pooled two-tailed t-Test is allowed
cngc10-1 mock meristem vs. cngc10-1 BL meristem
Data is normally distrubuted (Shapiro-Wilk Test), variances are equal (Levene Test); pooled two-tailed t-Test is allowed
cngc10-1 mock early elongation vs. cngc10-1 BL early elongation
Data is not normally distrubuted (Shapiro-Wilk Test), two-tailed Wilcoxon Test needs to be applied
cngc10-2 mock meristem vs. cngc10-2 BL meristem
Data is not normally distrubuted (Shapiro-Wilk Test), two-tailed Wilcoxon Test needs to be applied
cngc10-2 mock early elongation vs. cngc10-2 BL early elongation
Data is normally distrubuted (Shapiro-Wilk Test), variances are unequal (Levene Test); two-tailed t-Test is allowed
